# Supplementary material for: Identification of key modules and genes associated with breast cancer prognosis using WGCNA and ceRNA network analysis
Source: Aging (Albany NY). 2020 Dec 9;13(2):2519–38. doi: 10.18632/aging.202285 (PMC7880379; doi:10.18632/aging.202285)
Supplement: Supplementary Table 1 [file aging-13-202285-s002.xlsx]

## Sheet: de_result
Supplementary Table 1. Total differential genes.
gene symbol	baseMean	log2FoldChange	lfcSE	stat	pvalue	padj
MMP11	17294.2	6.25664	0.142649	43.8602	0	0		gene symbol
MYOM1	588.229	-4.7682	0.122645	-38.8781	0	0
NEK2	1475.81	4.24667	0.112047	37.9009	0	0
GPAM	4880.82	-4.45156	0.106272	-41.8883	0	0
COL10A1	8557.64	7.11246	0.155996	45.5937	0	0
AC093850.2	304.169	5.54606	0.153452	36.142	4.9633e-286	3.67508e-282
FHL1	9257.18	-5.03451	0.140012	-35.9578	3.82108e-283	2.42513e-279
TNS1	15338.8	-3.11053	0.0878041	-35.4258	6.83599e-275	3.79628e-271
COL11A1	12000.6	6.17857	0.176801	34.9465	1.46165e-267	7.21519e-264
PKMYT1	1123.23	3.99782	0.115907	34.4915	1.07469e-260	4.77452e-257
KIF4A	1574.07	3.84218	0.112245	34.2304	8.54301e-257	3.45036e-253
LYVE1	772.176	-4.95287	0.147828	-33.5042	4.19015e-246	1.5513e-242
PPAPDC1A	460.29	5.00095	0.152053	32.8894	3.11232e-237	1.06362e-233
KLB	370.684	-4.72707	0.143792	-32.8743	5.12402e-237	1.62603e-233
SORBS1	6667.85	-3.68138	0.112443	-32.7401	4.20322e-235	1.24491e-231
SIK2	3808.16	-2.4546	0.075191	-32.6448	9.49709e-234	2.63705e-230
HSPB7	1001.24	-5.12463	0.157146	-32.6105	2.90932e-233	7.60307e-230
KIAA0101	1105.74	3.31876	0.101794	32.6028	3.74504e-233	9.24338e-230
CAV1	8695.67	-3.38786	0.103938	-32.5951	4.81871e-233	1.12674e-229
IQGAP3	2255.5	3.69875	0.114452	32.3171	4.02744e-229	8.94636e-226
NPR1	1195.97	-3.60223	0.111784	-32.225	7.89405e-228	1.67004e-224
SLC2A4	308.931	-4.65424	0.144891	-32.1223	2.14999e-226	4.3417e-223
KCNIP2	996.852	-5.1391	0.160055	-32.1084	3.37078e-226	6.51102e-223
RDH5	152.296	-4.2839	0.133699	-32.0414	2.8917e-225	5.35289e-222
UBE2C	2267.34	4.18765	0.131001	31.9665	3.18234e-224	5.65528e-221
GYG2	2282.52	-4.12807	0.129169	-31.9585	4.1126e-224	7.02732e-221
ASF1B	1546.13	3.06383	0.0969594	31.5991	3.80239e-219	6.25662e-216
AOC3	4863.99	-3.97196	0.125718	-31.5942	4.43436e-219	7.0359e-216
TPX2	4493.39	3.57214	0.113368	31.5094	6.4676e-218	9.90814e-215
ACVR1C	575.493	-5.22418	0.165975	-31.4757	1.87117e-217	2.77102e-214
IBSP	161.001	6.92846	0.220159	31.4703	2.21291e-217	3.17139e-214
CDC25C	344.754	3.38872	0.107767	31.4448	4.95054e-217	6.87305e-214
NUF2	1006.78	3.77314	0.120628	31.2791	8.98255e-215	1.2093e-211
UHRF1	1242.35	3.34199	0.107023	31.2268	4.6066e-214	6.01934e-211
AQPEP	152.045	-5.09116	0.163756	-31.0899	3.30274e-212	4.19231e-209
UBE2T	1341.62	3.22092	0.103618	31.0846	3.88492e-212	4.79431e-209
HSD17B6	305.088	2.99713	0.096546	31.0435	1.3964e-211	1.6726e-208
CLEC3B	893.878	-3.89663	0.125525	-31.0427	1.43064e-211	1.6726e-208
SPC25	420.832	2.81871	0.0911533	30.9227	5.91426e-210	6.73726e-207
GSN	37872.5	-2.53247	0.0822173	-30.8022	2.44912e-208	2.72018e-205
HJURP	881.187	3.53025	0.114925	30.718	3.27313e-207	3.54672e-204
KLHL31	284.922	-3.88843	0.126673	-30.6967	6.29617e-207	6.66e-204
CRHBP	63.4448	-3.88875	0.127064	-30.6046	1.06422e-205	1.09954e-202
SPTBN1	22699.3	-2.05309	0.0671397	-30.5793	2.30385e-205	2.32621e-202
NUSAP1	2577.85	3.05117	0.0999285	30.5336	9.34394e-205	9.22496e-202
NIPSNAP3B	172.38	-2.90202	0.0952745	-30.4596	8.94182e-204	8.63605e-201
CFL2	1328.42	-2.26159	0.0743528	-30.417	3.27353e-203	3.09432e-200
RP11-175K6.2	99.9056	-3.49139	0.114937	-30.3766	1.12026e-202	1.03687e-199
ACACB	3762.45	-3.66344	0.120624	-30.3708	1.33661e-202	1.21187e-199
TROAP	832.987	3.57524	0.118116	30.269	2.93697e-201	2.60961e-198
MMP13	1674.43	6.17134	0.204968	30.1088	3.71263e-199	3.23414e-196
CDK1	2629.53	3.15161	0.105194	29.9601	3.24917e-197	2.77598e-194
CKAP2L	699.796	3.33715	0.112077	29.7756	8.08476e-195	6.77702e-192
ACSM5	218.693	-3.75948	0.126331	-29.7589	1.32975e-194	1.09402e-191
NAALAD2	110.276	-2.93127	0.0985165	-29.7541	1.53334e-194	1.23857e-191
PLK1	1760.5	3.427	0.115334	29.7138	5.09808e-194	4.04451e-191
CAT	6387.14	-2.03343	0.0685375	-29.6689	1.9357e-193	1.50873e-190
DTL	1735.55	3.04908	0.102863	29.6422	4.26924e-193	3.27016e-190
PYGM	111.679	-3.35274	0.113226	-29.6109	1.08027e-192	8.03126e-190
RP11-644F5.10	75.7265	-2.32796	0.0786186	-29.6108	1.08465e-192	8.03126e-190
RP11-736K20.4	299.175	-3.62013	0.1223	-29.6004	1.4786e-192	1.07688e-189
CEP55	1360	3.43107	0.116038	29.5684	3.80589e-192	2.72717e-189
KIF20A	1698.2	3.37663	0.114421	29.5106	2.10207e-191	1.48236e-188
PBK	830.96	3.45799	0.117326	29.4733	6.32566e-191	4.39109e-188
ITIH5	3036.31	-4.01139	0.136341	-29.4217	2.89978e-190	1.98198e-187
INHBA	4420.96	3.38642	0.115205	29.3946	6.44032e-190	4.33522e-187
LIPE	3678.61	-4.54329	0.154964	-29.3184	6.05279e-189	4.01354e-186
CENPF	6542.89	3.25784	0.111149	29.3106	7.59804e-189	4.96409e-186
BUB1	1544.95	3.29258	0.112429	29.2859	1.56887e-188	1.01015e-185
MMD	1779.83	-2.84131	0.0971944	-29.2333	7.33016e-188	4.59724e-185
EBF1	1163.84	-3.07321	0.105127	-29.2332	7.34698e-188	4.59724e-185
MELK	1190.72	3.62934	0.124348	29.187	2.83165e-187	1.74725e-184
WDR62	772.502	2.87143	0.0988902	29.0365	2.2777e-185	1.38618e-182
KIF18B	697.783	3.57097	0.123013	29.0291	2.8243e-185	1.69561e-182
SLC24A2	320.558	4.92681	0.169823	29.0114	4.72823e-185	2.80081e-182
KIFC1	2034.34	3.16174	0.109059	28.9912	8.49013e-185	4.96304e-182
CAV2	2756.84	-2.91381	0.100517	-28.9884	9.21039e-185	5.31416e-182
SPC24	650.38	3.14662	0.108562	28.9845	1.03113e-184	5.87309e-182
WISP1	1148.49	3.53046	0.121853	28.9731	1.43691e-184	8.08069e-182
HSD17B13	68.7263	-5.09029	0.175885	-28.9411	3.6371e-184	2.01982e-181
PDE2A	862.887	-3.12591	0.108082	-28.9216	6.38022e-184	3.49943e-181
HMMR	868.732	3.04077	0.105202	28.9041	1.06076e-183	5.74711e-181
FAM13A	1612.47	-2.46528	0.0856453	-28.7848	3.32407e-182	1.77926e-179
SYNE3	1360.11	-3.01653	0.105023	-28.7225	1.99743e-181	1.05643e-178
LPL	8352.11	-4.72166	0.164433	-28.7149	2.48709e-181	1.29993e-178
DLGAP5	1023.52	3.29965	0.114973	28.6994	3.88187e-181	2.00534e-178
PTTG1	1377.55	3.21788	0.112333	28.6459	1.80167e-180	9.20032e-178
PAFAH1B3	3567.46	2.49143	0.0871192	28.5979	7.12677e-180	3.59796e-177
SLC16A7	761.997	-3.40757	0.119375	-28.5452	3.22455e-179	1.60963e-176
CCNB1	2958.32	2.57157	0.0901101	28.5382	3.94096e-179	1.94539e-176
ITGA7	1806.72	-3.66017	0.128377	-28.5111	8.5251e-179	4.16203e-176
RRM2	3164.57	3.41295	0.119741	28.5028	1.08252e-178	5.22751e-176
CKS2	1908.06	2.65886	0.0933515	28.4823	1.94158e-178	9.27511e-176
ACO1	3689.26	-2.03924	0.0716024	-28.4801	2.06927e-178	9.77996e-176
ASPM	1852.61	3.51801	0.123716	28.4362	7.2144e-178	3.37384e-175
CDKN3	587.872	2.91318	0.102543	28.4095	1.542e-177	7.13608e-175
NEIL3	200.998	3.3986	0.119935	28.337	1.21082e-176	5.54569e-174
EXO1	824.563	3.43645	0.121369	28.314	2.32074e-176	1.05208e-173
CST1	725.32	6.94054	0.245378	28.2851	5.27459e-176	2.36701e-173
C16orf59	438.448	2.84578	0.100643	28.2761	6.8046e-176	3.02308e-173
AURKA	1477.26	3.11726	0.110294	28.263	9.84712e-176	4.33147e-173
ZWINT	2407.44	2.58513	0.0915112	28.2493	1.44986e-175	6.31501e-173
MTURN	3575.45	-2.56734	0.0909116	-28.2399	1.89165e-175	8.15927e-173
KIF2C	1604.69	3.32609	0.117825	28.229	2.57676e-175	1.10075e-172
BUB1B	1155.08	2.95711	0.105253	28.0953	1.11799e-173	4.73038e-171
FZD4	4157.21	-2.68096	0.0954415	-28.0901	1.29334e-173	5.42068e-171
BTNL9	1019.63	-4.0051	0.142623	-28.0817	1.63942e-173	6.80696e-171
HBB	1825.82	-4.93043	0.176604	-27.918	1.61213e-171	6.63169e-169
PPARG	1043.55	-3.38843	0.121417	-27.9075	2.16417e-171	8.82087e-169
SH3D19	4472.71	-2.01922	0.0723801	-27.8975	2.86027e-171	1.15521e-168
RP11-175K6.1	59.0469	-3.19265	0.114482	-27.8878	3.74694e-171	1.49969e-168
GPR146	106.964	-2.79083	0.100087	-27.884	4.1757e-171	1.65637e-168
SKA1	477.132	3.37787	0.121308	27.8455	1.22228e-170	4.80552e-168
GABRD	217.646	3.23108	0.116184	27.8099	3.28948e-170	1.28194e-167
HSPB6	1924.41	-4.55625	0.163958	-27.7891	5.87761e-170	2.27065e-167
TK1	3910.03	3.08788	0.111187	27.7719	9.47018e-170	3.627e-167
SGOL1	357.46	3.26773	0.117723	27.7579	1.39926e-169	5.31324e-167
PPP1R12B	3769.24	-2.0986	0.0756088	-27.756	1.47368e-169	5.5484e-167
ANLN	2613.28	3.36376	0.121376	27.7135	4.80062e-169	1.79224e-166
NDC80	921.636	3.20069	0.115515	27.708	5.591e-169	2.06993e-166
COMP	7646.78	4.49198	0.162121	27.7076	5.65008e-169	2.07451e-166
CCDC64	1398.63	2.73453	0.0987049	27.7041	6.22789e-169	2.26792e-166
CDCA8	1332.17	3.03317	0.109487	27.7034	6.35685e-169	2.29606e-166
ARHGAP20	259.243	-3.10002	0.112074	-27.6606	2.08217e-168	7.46004e-166
GJB2	2505.81	4.29468	0.155783	27.5683	2.66824e-167	9.48336e-165
PALMD	2452.78	-2.89159	0.1049	-27.5653	2.90022e-167	1.0226e-164
CDCA5	1647.74	3.10358	0.112784	27.5178	1.07427e-166	3.758e-164
PAMR1	738.376	-3.51314	0.127704	-27.51	1.33245e-166	4.62474e-164
ITSN1	3136.48	-1.80466	0.0656633	-27.4835	2.76639e-166	9.52731e-164
FOXM1	2657.45	3.47175	0.126358	27.4754	3.45842e-166	1.1819e-163
RP11-736K20.5	103.191	-3.22777	0.11756	-27.4563	5.84221e-166	1.98131e-163
SKA3	594.291	3.08797	0.112642	27.4141	1.86203e-165	6.26701e-163
NCAPG	1094.26	3.06489	0.11198	27.3699	6.26578e-165	2.093e-162
CDC20	2302.56	3.54335	0.129579	27.3451	1.23425e-164	4.09209e-162
MMP1	1981.47	6.51617	0.238343	27.3394	1.44247e-164	4.74701e-162
BIRC5	2755.85	3.56935	0.130612	27.3279	1.97545e-164	6.45317e-162
FIGF	243.586	-4.89414	0.179467	-27.2704	9.52981e-164	3.09037e-161
KIF14	709.49	3.50435	0.128561	27.2582	1.33039e-163	4.28298e-161
CCNB2	1419.8	3.04965	0.111974	27.2353	2.48117e-163	7.93028e-161
TOP2A	9370.24	3.50294	0.129084	27.1369	3.61955e-162	1.14861e-159
ABCD2	218.194	-4.12316	0.151965	-27.1322	4.10951e-162	1.29484e-159
FAM83D	1093.93	3.50572	0.129234	27.1269	4.74332e-162	1.48402e-159
GTSE1	731.811	3.04849	0.112382	27.1262	4.83646e-162	1.50258e-159
POC1A	726.193	2.11221	0.0779065	27.1121	7.09681e-162	2.18951e-159
ASPA	154.051	-3.59532	0.13282	-27.0691	2.2766e-161	6.97535e-159
RP11-427J23.1	31.3956	-3.80473	0.14076	-27.03	6.56876e-161	1.99884e-158
PYCR1	5907.34	2.3602	0.0873232	27.0283	6.87634e-161	2.0782e-158
ERCC6L	402.165	2.84972	0.105439	27.0271	7.09277e-161	2.12912e-158
GPRIN1	587.986	2.89109	0.107011	27.0168	9.37944e-161	2.79665e-158
PAQR4	1976.84	2.57938	0.0955943	26.9826	2.36648e-160	7.00905e-158
CASC5	838.172	2.81624	0.104403	26.9747	2.92799e-160	8.61468e-158
CDCA3	902.924	3.06172	0.113673	26.9344	8.68046e-160	2.53715e-157
ADAMTS5	1408.28	-3.07731	0.114396	-26.9005	2.16619e-159	6.29001e-157
MOCS1	1169.56	-2.16571	0.0805409	-26.8896	2.90695e-159	8.38617e-157
TPM3	28680.1	1.26995	0.0472586	26.8724	4.61777e-159	1.32357e-156
KIF23	1609.93	2.63236	0.0982268	26.7987	3.34186e-158	9.51722e-156
TNXB	2518.63	-4.06349	0.151988	-26.7356	1.81484e-157	5.13552e-155
KIF11	2261.81	2.51521	0.0941945	26.7023	4.43075e-157	1.24585e-154
GPBAR1	64.6476	-2.96257	0.11102	-26.685	7.02389e-157	1.96258e-154
LMNB1	3558.45	2.45525	0.092029	26.6791	8.22497e-157	2.28382e-154
HAGHL	725.072	3.47256	0.130662	26.5766	1.26479e-155	3.49011e-153
SPAG5	2087.81	2.80806	0.105722	26.5607	1.92977e-155	5.29222e-153
NUAK2	652.861	2.25703	0.0851556	26.5048	8.53507e-155	2.32631e-152
PRC1	3201.87	2.65229	0.100141	26.4854	1.42622e-154	3.86357e-152
LINC00922	60.7245	4.58115	0.173023	26.4771	1.77763e-154	4.78635e-152
CD34	5259.93	-2.11763	0.0800539	-26.4526	3.41009e-154	9.1265e-152
TMEM37	995.976	-3.00043	0.113521	-26.4307	6.07824e-154	1.61699e-151
EPYC	232.04	6.07266	0.230038	26.3985	1.4272e-153	3.77418e-151
RMI2	977.328	2.66945	0.101254	26.3639	3.55532e-153	9.34628e-151
CCDC69	2167.64	-2.9571	0.1122	-26.3555	4.43796e-153	1.1598e-150
AURKB	783.624	3.39301	0.128778	26.3478	5.43848e-153	1.41296e-150
RAD51	568.055	2.58457	0.0981533	26.332	8.25826e-153	2.13308e-150
DMGDH	125.126	-2.78683	0.105963	-26.3	1.91724e-152	4.92353e-150
MKI67	5918.78	3.08664	0.117641	26.2379	9.83007e-152	2.50989e-149
IGFBP6	1092.42	-3.212	0.122644	-26.1895	3.49738e-151	8.87876e-149
CCL11	75.383	4.10578	0.156782	26.1878	3.6549e-151	9.22591e-149
PDE3B	912.676	-3.80774	0.145435	-26.1816	4.30091e-151	1.07953e-148
MYBL2	3341.03	3.83919	0.146684	26.1731	5.3792e-151	1.34259e-148
CEP68	2354.79	-1.21568	0.0464489	-26.1725	5.47061e-151	1.35778e-148
GPX3	8929.24	-3.67483	0.140607	-26.1355	1.44101e-150	3.55666e-148
NCAPH	917.154	2.78535	0.106669	26.112	2.66216e-150	6.53435e-148
CENPM	514.254	2.82183	0.108093	26.1056	3.15254e-150	7.69548e-148
SDPR	1339.65	-3.95314	0.151579	-26.0798	6.1873e-150	1.5021e-147
DEPDC1B	364.624	2.94321	0.112912	26.0663	8.78398e-150	2.1209e-147
PPAP2B	4602.67	-1.95897	0.0752035	-26.0489	1.3838e-149	3.32315e-147
SVEP1	2691.16	-3.29577	0.126779	-25.9963	5.45386e-149	1.30268e-146
GINS1	1113.65	2.49494	0.0960059	25.9874	6.88256e-149	1.63514e-146
KLHL33	12.3448	-4.06711	0.156621	-25.9679	1.14213e-148	2.69902e-146
TACC3	2744.44	2.34458	0.0903144	25.9602	1.39448e-148	3.27792e-146
SLC50A1	5699.02	1.92973	0.0743394	25.9583	1.46441e-148	3.42417e-146
LRRC15	8037.41	3.81751	0.147089	25.9537	1.65198e-148	3.84253e-146
LEPR	1123.79	-2.98531	0.115082	-25.9406	2.3213e-148	5.37127e-146
CILP2	951.593	3.46033	0.13372	25.8774	1.19676e-147	2.75483e-145
TRIM59	768.9	1.99055	0.0770951	25.8194	5.37108e-147	1.23e-144
KIAA0408	11.2425	-4.55877	0.176831	-25.7804	1.47235e-146	3.35447e-144
DDR2	4492.72	-2.68208	0.104171	-25.747	3.48478e-146	7.89889e-144
ESPL1	1076.43	2.7385	0.106486	25.7169	7.56199e-146	1.70536e-143
RECQL4	1706.23	2.80506	0.109166	25.6954	1.31622e-145	2.95332e-143
LINC01537	31.1015	-3.60883	0.140501	-25.6854	1.70327e-145	3.80258e-143
GRM4	495.026	5.37343	0.209229	25.682	1.85774e-145	4.1267e-143
CCNA2	1400.55	2.86554	0.11168	25.6585	3.39602e-145	7.50621e-143
AOC4P	14.3221	-3.28783	0.128458	-25.5946	1.75147e-144	3.85211e-142
DEPDC1	787.615	3.25575	0.127283	25.5788	2.62323e-144	5.74099e-142
CENPA	437.047	3.27478	0.128049	25.5743	2.94784e-144	6.41978e-142
LDB2	1139.35	-2.14709	0.0840275	-25.5522	5.18652e-144	1.12401e-141
RP11-941H19.2	5.30131	-3.77904	0.148005	-25.5332	8.43416e-144	1.81895e-141
MYZAP	292.438	-3.23119	0.126637	-25.5153	1.33344e-143	2.86187e-141
NKAPL	30.6894	-2.71545	0.106459	-25.5069	1.65391e-143	3.53261e-141
RPLP0P2	242.667	2.69664	0.105863	25.4729	3.93364e-143	8.36172e-141
EZH2	1512.67	2.30832	0.0907193	25.4446	8.09392e-143	1.71233e-140
ABCA9	608.079	-3.64771	0.14348	-25.4231	1.40066e-142	2.94915e-140
MCAM	8790.25	-2.18078	0.0858448	-25.4037	2.29327e-142	4.80581e-140
ANKRD53	67.0212	-2.69281	0.106063	-25.3888	3.3531e-142	6.99381e-140
EPB42	28.548	-3.61916	0.142582	-25.3829	3.89094e-142	8.07771e-140
ACSS2	3167.09	-1.69661	0.0668718	-25.3711	5.25635e-142	1.08616e-139
ELMOD3	1553.86	-1.43268	0.0566467	-25.2916	3.95534e-141	8.13536e-139
E2F8	375.076	3.31582	0.131217	25.2698	6.86117e-141	1.40471e-138
OIP5	184.434	2.43791	0.0964822	25.2679	7.1936e-141	1.46601e-138
H2AFY	15017.8	1.08586	0.0431324	25.1749	7.54219e-140	1.53003e-137
NACC1	5893.14	1.4244	0.0565888	25.171	8.3224e-140	1.68063e-137
ESM1	604.788	2.94287	0.11701	25.1505	1.39638e-139	2.80709e-137
ALPK3	750.277	-2.56096	0.101927	-25.1253	2.63174e-139	5.26668e-137
FXYD1	70.6754	-3.59918	0.14334	-25.1094	3.92752e-139	7.82458e-137
APOB	113.457	-5.52546	0.220131	-25.1007	4.88263e-139	9.68396e-137
2020-03-01	1601.66	-2.73395	0.108925	-25.0993	5.06664e-139	1.00042e-136
CCDC50	4244.06	-1.28783	0.0513238	-25.0924	6.02647e-139	1.18468e-136
ANGPT4	46.3628	-3.48586	0.139229	-25.0369	2.42322e-138	4.74257e-136
PLAC1	82.7848	4.76708	0.190655	25.0036	5.58274e-138	1.08783e-135
ESCO2	432.998	2.7057	0.108238	24.9977	6.48325e-138	1.25778e-135
ALDH1L1	542.676	-4.73386	0.189391	-24.9952	6.88804e-138	1.3305e-135
CENPU	1441.65	2.37179	0.0949817	24.9711	1.26159e-137	2.42634e-135
RP11-417E7.2	154.701	3.65029	0.14637	24.9388	2.82478e-137	5.40932e-135
PFKFB1	177.052	-3.57656	0.143576	-24.9106	5.70815e-137	1.0884e-134
HCAR2	195.326	-3.42157	0.137481	-24.8876	1.0138e-136	1.92479e-134
ADAMTS14	396.018	3.10427	0.124851	24.8637	1.83715e-136	3.47316e-134
RP11-400N13.3	36.3667	5.73567	0.230923	24.838	3.48546e-136	6.56138e-134
CDC45	626.767	2.90814	0.117219	24.8093	7.10999e-136	1.33281e-133
PLIN1	8119.32	-5.31257	0.214563	-24.76	2.4209e-135	4.51905e-133
MTFR2	232.564	2.8426	0.115034	24.7111	8.13522e-135	1.51223e-132
GPD1	5129.77	-5.29458	0.214514	-24.6817	1.68118e-134	3.11208e-132
CNIH2	283.072	3.34903	0.135739	24.6726	2.1042e-134	3.87897e-132
AQP7	975.362	-5.14199	0.208462	-24.6663	2.46261e-134	4.52092e-132
TLN2	2795.68	-1.91999	0.0778582	-24.66	2.87235e-134	5.25143e-132
PLIN4	14850.6	-5.1821	0.211539	-24.4972	1.58408e-132	2.88426e-130
CCDC3	1799.93	-2.8115	0.11482	-24.4862	2.07451e-132	3.76181e-130
GNG11	1920.62	-2.16631	0.0885598	-24.4616	3.78784e-132	6.84075e-130
FAM64A	430.06	3.05037	0.124711	24.4595	3.99066e-132	7.17786e-130
SLC35A2	3209.12	1.33008	0.0544099	24.4456	5.60879e-132	1.00476e-129
HMGB3P10	7.49235	-2.98976	0.122311	-24.4439	5.84359e-132	1.04262e-129
RAD54L	425.733	2.79265	0.114306	24.4313	7.95219e-132	1.41317e-129
TMEM220	259.482	-2.24237	0.0918981	-24.4006	1.68629e-131	2.98473e-129
NMUR1	71.8534	-3.46772	0.142389	-24.3539	5.27289e-131	9.29597e-129
HIST1H3H	640.503	4.27773	0.175675	24.3502	5.76352e-131	1.01208e-128
SLC19A3	1092.09	-5.02037	0.20643	-24.32	1.20594e-130	2.10931e-128
C1QTNF6	2657.5	2.22334	0.0914247	24.3188	1.23993e-130	2.16026e-128
ACSL1	10408.3	-2.8014	0.115204	-24.3169	1.29776e-130	2.25218e-128
E2F1	1323.44	2.64735	0.108894	24.3112	1.49157e-130	2.5712e-128
GLYAT	168.614	-5.92662	0.243782	-24.3112	1.49317e-130	2.5712e-128
CTXN1	1462.37	2.87859	0.118456	24.301	1.91315e-130	3.28168e-128
CENPE	1159.47	2.60541	0.107288	24.2843	2.86943e-130	4.90308e-128
SEMA3G	2281.78	-2.85134	0.117622	-24.2415	8.13042e-130	1.38395e-127
SHCBP1	699.339	2.60708	0.107578	24.2343	9.68966e-130	1.64306e-127
SLC17A7	79.0783	-2.99531	0.123889	-24.1774	3.84363e-129	6.4928e-127
MAGI2-AS3	791.29	-2.22863	0.0922008	-24.1715	4.43774e-129	7.46801e-127
C1QTNF9	20.4324	-3.67374	0.152375	-24.1098	1.97238e-128	3.30668e-126
GHR	1888.71	-3.14629	0.130842	-24.0464	9.10857e-128	1.5213e-125
RP11-863P13.3	68.2086	3.28953	0.136949	24.0201	1.71566e-127	2.85474e-125
UBE2S	1348.43	2.5313	0.105447	24.0055	2.43556e-127	4.03749e-125
CLEC5A	382.499	3.24758	0.135405	23.9841	4.07037e-127	6.72247e-125
PLXNA4	1106	-3.32893	0.138803	-23.9831	4.17375e-127	6.86767e-125
RP5-864K19.4	41.2539	-1.92672	0.0803392	-23.9823	4.25236e-127	6.97121e-125
EBF3	386.721	-2.74975	0.11468	-23.9774	4.78119e-127	7.78073e-125
MAP1LC3C	63.1981	-3.74536	0.156203	-23.9776	4.76485e-127	7.78073e-125
FRMD1	47.8148	-4.36399	0.182104	-23.9642	6.56969e-127	1.06523e-124
NUP210	7634.52	1.91748	0.080022	23.9619	6.9375e-127	1.12077e-124
LRRN4CL	243.933	-3.3397	0.139628	-23.9185	1.96847e-126	3.1686e-124
AQP7P1	24.3316	-5.06295	0.211767	-23.9081	2.52055e-126	4.04262e-124
DPT	4403.91	-3.51313	0.146969	-23.9039	2.79174e-126	4.46147e-124
RHOQ	3431.43	-1.56485	0.0654719	-23.9011	2.98169e-126	4.74794e-124
KIF15	703.855	2.53752	0.1062	23.8937	3.55935e-126	5.64754e-124
TTK	928.781	2.86865	0.120143	23.8769	5.32354e-126	8.41669e-124
ZNF106	5956.64	-1.66857	0.0699914	-23.8397	1.2959e-125	2.0416e-123
CHRDL1	2858.58	-4.44097	0.186433	-23.8207	2.03768e-125	3.19887e-123
TGFBR2	8355.18	-2.21202	0.0928778	-23.8164	2.25791e-125	3.53213e-123
RNASEH2A	1911.05	1.79793	0.0755114	23.8101	2.62694e-125	4.09499e-123
LMOD1	2137.5	-2.65179	0.111462	-23.791	4.13901e-125	6.4295e-123
OXTR	2037.78	-4.0762	0.171406	-23.781	5.25445e-125	8.13378e-123
MCM10	804.226	3.13485	0.13187	23.7723	6.46903e-125	9.97915e-123
CCNF	1809.87	1.74695	0.0735304	23.7582	9.04482e-125	1.39043e-122
RDM1	58.1302	3.06992	0.129234	23.7548	9.81156e-125	1.5031e-122
CLSPN	465.765	2.86708	0.120722	23.7494	1.11429e-124	1.70119e-122
CXorf36	1530.32	-2.04685	0.0862268	-23.738	1.46224e-124	2.22475e-122
POLQ	485.268	2.60352	0.109732	23.7262	1.93458e-124	2.93336e-122
MYOC	191.893	-6.85747	0.289108	-23.7194	2.27297e-124	3.43474e-122
CST4	175.015	7.67197	0.323618	23.7069	3.06281e-124	4.6126e-122
RETSAT	7603.13	-1.69982	0.071751	-23.6905	4.52061e-124	6.78503e-122
BHMT2	373.395	-3.16265	0.133627	-23.6678	7.74548e-124	1.15861e-121
FERMT2	3707.68	-1.95219	0.0825051	-23.6615	8.98682e-124	1.33979e-121
C6orf99	72.4389	2.68405	0.113438	23.661	9.08816e-124	1.35037e-121
KIF26B	2028.54	2.80594	0.118607	23.6575	9.88753e-124	1.46424e-121
SCN4A	254.377	-3.60167	0.152309	-23.6472	1.26246e-123	1.86337e-121
SOX12	3273.83	1.82346	0.0771255	23.6428	1.40085e-123	2.06078e-121
RUSC1	3989.46	1.46941	0.0621812	23.6311	1.84696e-123	2.70808e-121
RP11-182J1.17	11.6808	-1.99125	0.084365	-23.6028	3.60898e-123	5.27421e-121
STARD9	675.861	-2.17767	0.0922847	-23.5973	4.10885e-123	5.96549e-121
FAM83H-AS1	3250.32	2.23182	0.0945791	23.5974	4.10297e-123	5.96549e-121
EPAS1	11528.8	-1.95506	0.0828692	-23.5922	4.63946e-123	6.71392e-121
GNAI1	1142.01	-2.48387	0.105285	-23.5918	4.68335e-123	6.75543e-121
CDO1	526.479	-3.63503	0.154103	-23.5884	5.07459e-123	7.29608e-121
SCARA5	835.038	-5.07942	0.215392	-23.5822	5.87158e-123	8.41473e-121
CST2	152.81	4.78739	0.203235	23.5559	1.09311e-122	1.56153e-120
ABCA10	227.344	-3.40658	0.144663	-23.5484	1.30335e-122	1.85589e-120
FAM47E-STBD1	43.2063	-2.06902	0.0878704	-23.5463	1.37022e-122	1.94488e-120
EZH1	2495.27	-1.31278	0.05576	-23.5433	1.46926e-122	2.07882e-120
PDK4	5956.41	-3.61673	0.153927	-23.4964	4.43523e-122	6.25536e-120
PRR19	184.369	1.932	0.0822744	23.4823	6.18009e-122	8.68869e-120
GALNT15	1145.3	-3.21666	0.137003	-23.4788	6.71248e-122	9.40742e-120
ROBO4	1514.99	-1.90184	0.081029	-23.4711	8.05941e-122	1.12596e-119
BGN	43976.2	2.33832	0.0996902	23.4559	1.15177e-121	1.60406e-119
DST	16119.4	-2.39623	0.102183	-23.4504	1.30986e-121	1.81853e-119
ADRA1A	48.6028	-4.47919	0.191018	-23.449	1.35271e-121	1.87218e-119
CLMP	2636.03	-2.4264	0.103537	-23.435	1.87824e-121	2.59145e-119
KLF15	235.728	-3.381	0.144338	-23.4243	2.41961e-121	3.32805e-119
PITX1	1920.24	3.81122	0.16276	23.4161	2.92665e-121	4.01303e-119
TXNIP	43131.2	-2.05222	0.0876629	-23.4103	3.35302e-121	4.58353e-119
PLSCR4	1549.52	-2.11778	0.0905083	-23.3988	4.39617e-121	5.99107e-119
RP5-965F6.2	11.0184	-3.80559	0.1627	-23.3902	5.37316e-121	7.3001e-119
RP11-159H22.2	9.34479	-3.12178	0.133568	-23.3723	8.18319e-121	1.1084e-118
CD36	13286	-4.19561	0.179637	-23.356	1.19697e-120	1.61635e-118
SYNPO	6001.64	-1.95375	0.0836977	-23.343	1.62432e-120	2.18678e-118
PPAP2A	2101.72	-1.766	0.075696	-23.3301	2.19435e-120	2.94527e-118
HBA2	314.304	-4.42851	0.190105	-23.2951	4.96616e-120	6.64553e-118
TRIP13	1189.23	2.57275	0.110453	23.2928	5.24334e-120	6.99537e-118
CCDC78	444.235	3.54183	0.152075	23.2899	5.60632e-120	7.45724e-118
RP11-424C20.2	51.1158	3.1765	0.136409	23.2865	6.07621e-120	8.05814e-118
FANCI	2749.28	1.97215	0.0847157	23.2796	7.13177e-120	9.42985e-118
FN1	273459	2.84897	0.122394	23.2771	7.56842e-120	9.97752e-118
LEP	2337.68	-6.16088	0.264749	-23.2706	8.80278e-120	1.15704e-117
LHFP	2749.86	-2.03772	0.0875786	-23.2674	9.49085e-120	1.2438e-117
SCT	37.0552	4.18259	0.179773	23.266	9.80278e-120	1.28091e-117
CCDC167	982.97	1.92271	0.0827869	23.2248	2.55787e-119	3.33251e-117
SPRY2	1027.89	-2.43045	0.104679	-23.2181	2.98598e-119	3.8789e-117
GPR116	2655.77	-1.94488	0.0837814	-23.2137	3.31108e-119	4.28867e-117
RABIF	1451.56	1.24135	0.0534837	23.2098	3.62488e-119	4.68147e-117
RP1-28O10.1	51.2797	-4.36991	0.188295	-23.2077	3.80272e-119	4.89691e-117
ECM2	1981.58	-2.62254	0.113145	-23.1785	7.50461e-119	9.63605e-117
GPIHBP1	410.879	-3.51441	0.151784	-23.1541	1.32279e-118	1.6936e-116
G0S2	1960.61	-4.05902	0.175343	-23.149	1.48828e-118	1.89999e-116
RP11-407P15.2	21.1828	-5.32595	0.2302	-23.1362	1.99964e-118	2.5455e-116
ADRB2	250.785	-2.82022	0.121899	-23.1356	2.02852e-118	2.57489e-116
RBP4	1830.51	-4.86228	0.210287	-23.1221	2.77581e-118	3.51341e-116
TIMP4	809.969	-4.52205	0.195838	-23.0908	5.72968e-118	7.23161e-116
CD300LG	628.317	-5.0119	0.217054	-23.0906	5.75698e-118	7.24548e-116
CTHRC1	5398.32	2.41788	0.104943	23.0399	1.85554e-117	2.3287e-115
ABCA8	1054.92	-3.90182	0.169369	-23.0374	1.96905e-117	2.4642e-115
DOCK11	1579.41	-2.3552	0.102296	-23.0233	2.72585e-117	3.40172e-115
RACGAP1	2751.08	1.91243	0.0831112	23.0105	3.65562e-117	4.54924e-115
LIFR	3059.01	-2.55972	0.111355	-22.987	6.2953e-117	7.81233e-115
ANO6	7124.75	-1.50317	0.0654913	-22.9522	1.40042e-116	1.73305e-114
EME1	308.786	2.617	0.114041	22.9479	1.54494e-116	1.90659e-114
FOXO1	2101.93	-1.854	0.0808016	-22.945	1.65159e-116	2.03255e-114
MAZ	4312.09	1.2837	0.0559605	22.9393	1.88242e-116	2.31023e-114
NMT2	1034.65	-1.88127	0.0820333	-22.933	2.17801e-116	2.66563e-114
PACSIN1	267.727	2.70495	0.117975	22.9282	2.43176e-116	2.96802e-114
FAM111B	1451.37	2.81569	0.122822	22.9249	2.62561e-116	3.19583e-114
ADRBK2	2259.48	-1.75328	0.0765718	-22.8972	4.95673e-116	6.01674e-114
HMGB3	4665.26	2.43466	0.106345	22.894	5.32673e-116	6.44824e-114
KIF18A	504.19	2.42974	0.106174	22.8844	6.63797e-116	8.01373e-114
CPED1	1119.45	-2.91317	0.127308	-22.883	6.8675e-116	8.26835e-114
ADH1A	18.4705	-4.85605	0.212251	-22.8789	7.54629e-116	9.06105e-114
AKAP12	3091.61	-2.7027	0.118221	-22.8615	1.12336e-115	1.34223e-113
PDZD2	2127.12	-2.65305	0.116049	-22.8615	1.12389e-115	1.34223e-113
E2F7	319.905	2.89094	0.126558	22.8428	1.72441e-115	2.0539e-113
CHRNA6	48.1503	3.90896	0.171133	22.8416	1.77102e-115	2.10377e-113
RAB26	592.933	3.12461	0.136942	22.8171	3.10337e-115	3.67663e-113
DCUN1D3	1030.68	-1.22721	0.0537855	-22.8167	3.13146e-115	3.70003e-113
KREMEN2	204.551	3.9764	0.174469	22.7914	5.57909e-115	6.5746e-113
PCOLCE2	1037.75	-4.59554	0.201649	-22.7898	5.79356e-115	6.80927e-113
EHD2	7379.69	-1.95046	0.0856009	-22.7855	6.38424e-115	7.48371e-113
TYRO3	920.629	-2.16201	0.0948867	-22.7852	6.43456e-115	7.52285e-113
ITGB1BP1	2804.93	-1.33831	0.0587368	-22.7849	6.46946e-115	7.5438e-113
HN1	6826.77	2.21863	0.0974188	22.7741	8.28094e-115	9.63082e-113
KLF4	2536.65	-2.56536	0.112789	-22.7447	1.61775e-114	1.87654e-112
RP1-302G2.5	47.3629	-3.46481	0.152687	-22.6922	5.34563e-114	6.18464e-112
RP3-414A15.12	52.4723	-2.22844	0.0982167	-22.689	5.74762e-114	6.63245e-112
LINC01561	23.9765	4.85527	0.214222	22.6646	1.00104e-113	1.15216e-111
CIT	1355.39	1.98231	0.0874877	22.6581	1.15962e-113	1.33122e-111
TDO2	283.611	3.77948	0.166826	22.6552	1.23937e-113	1.41911e-111
MAD2L1	1425.22	2.17753	0.0961421	22.6491	1.42466e-113	1.62708e-111
FOXN3	3537.38	-1.6328	0.0721013	-22.6459	1.53218e-113	1.74539e-111
HIST1H2AI	106.81	4.62894	0.204641	22.6198	2.76617e-113	3.14303e-111
CTD-2135D7.5	11.144	-2.9163	0.12895	-22.6157	3.03353e-113	3.43802e-111
KPNA2	8998.95	2.16107	0.0956804	22.5864	5.89889e-113	6.66845e-111
SPX	290.062	-5.19914	0.230344	-22.5712	8.3189e-113	9.3803e-111
HEPACAM	65.7341	-5.25626	0.232946	-22.5643	9.72346e-113	1.09363e-110
RP11-875O11.1	37.2521	-1.82511	0.0809041	-22.5589	1.09723e-112	1.23097e-110
CDCA2	560.823	2.93546	0.130252	22.5368	1.80743e-112	2.02263e-110
GNG13	57.3536	6.00975	0.266766	22.5282	2.19825e-112	2.45382e-110
SHE	652.125	-2.13561	0.0948403	-22.5179	2.77046e-112	3.0848e-110
TRHDE-AS1	197.517	-5.50936	0.244933	-22.4933	4.82305e-112	5.35684e-110
GNG2	1335.37	-2.06899	0.0920527	-22.4762	7.09849e-112	7.86445e-110
SLC35G2	233.094	-2.03149	0.090402	-22.4717	7.84642e-112	8.67147e-110
POLR3K	1543.34	1.53447	0.0682874	22.4708	8.00605e-112	8.82592e-110
EEPD1	780.436	-1.71277	0.0762955	-22.4492	1.30323e-111	1.43314e-109
KIF22	4310.99	1.47319	0.0656724	22.4324	1.89972e-111	2.07879e-109
ATOH8	280.401	-3.28065	0.146245	-22.4325	1.89829e-111	2.07879e-109
CORO2B	293.121	-2.34551	0.104603	-22.423	2.34858e-111	2.56364e-109
GOLGA8M	7.52914	-2.88031	0.128763	-22.3691	7.86991e-111	8.56953e-109
SGK2	151.627	-3.18378	0.142453	-22.3496	1.21751e-110	1.3225e-108
ADH5	6150.34	-0.913028	0.0408541	-22.3485	1.24843e-110	1.35278e-108
TLCD1	772.071	2.44825	0.109565	22.3452	1.34436e-110	1.45319e-108
ECT2	3328.91	1.88423	0.0843628	22.3348	1.69645e-110	1.82933e-108
GABARAPL1	2959.06	-1.51961	0.0680643	-22.3261	2.06003e-110	2.216e-108
SBK1	2378.55	2.28144	0.102457	22.2672	7.68108e-110	8.24269e-108
CDC14B	882.703	-1.82603	0.0820966	-22.2424	1.33516e-109	1.42933e-107
KCNIP2-AS1	11.4838	-2.25731	0.101505	-22.2385	1.45857e-109	1.55769e-107
MYCT1	693.572	-1.96178	0.0882814	-22.2219	2.1117e-109	2.24979e-107
SLC7A10	179.955	-4.72628	0.2127	-22.2205	2.17862e-109	2.31554e-107
VWF	13683.4	-2.0829	0.0937487	-22.2179	2.30518e-109	2.4442e-107
CABP1	42.8769	-2.24503	0.101098	-22.2065	2.97503e-109	3.14694e-107
S100P	3217.22	4.7609	0.214516	22.1937	3.95148e-109	4.16989e-107
RP4-612B15.3	47.2675	-1.5037	0.0677587	-22.192	4.10714e-109	4.32389e-107
CDC6	1747.39	3.01121	0.135731	22.1851	4.78716e-109	5.02787e-107
MND1	230.666	2.69381	0.121427	22.1846	4.83492e-109	5.06606e-107
TMEM63B	4645.41	1.31423	0.0592549	22.1793	5.43727e-109	5.6838e-107
TRIM11	2516.38	1.38276	0.0623623	22.1731	6.24963e-109	6.51766e-107
UNC5B	4512.05	1.9753	0.0892124	22.1416	1.25767e-108	1.30853e-106
ARHGAP11A	1258.07	2.22331	0.10049	22.1248	1.82589e-108	1.8953e-106
LGI4	233.447	-2.38822	0.107978	-22.1177	2.1366e-108	2.21265e-106
F8	1346.68	-1.74851	0.0790645	-22.115	2.26689e-108	2.34211e-106
AC015849.16	58.99	3.60193	0.162899	22.1114	2.4552e-108	2.53079e-106
DTX1	479.568	-2.45419	0.111128	-22.0845	4.45737e-108	4.58397e-106
OR2B6	33.3884	4.57844	0.20746	22.069	6.2701e-108	6.4333e-106
SLC20A1	4641.75	1.13923	0.0516232	22.0681	6.40462e-108	6.55618e-106
DGAT2	3882.44	-3.33035	0.150961	-22.061	7.4868e-108	7.64634e-106
AIM1L	183.303	3.24922	0.1474	22.0435	1.10154e-107	1.12243e-105
ABCA6	557.591	-2.72557	0.123721	-22.03	1.48649e-107	1.51122e-105
PNPLA2	9262.02	-1.84716	0.0838742	-22.023	1.73568e-107	1.76053e-105
ANTXR2	2691.18	-1.79814	0.0816919	-22.0113	2.24569e-107	2.27264e-105
SLIT3	4287.82	-2.41276	0.10966	-22.0021	2.74972e-107	2.7764e-105
SALL4	116.023	2.79588	0.127104	21.9969	3.0866e-107	3.10949e-105
RBMS2	2591.2	-1.16073	0.0528084	-21.9801	4.46949e-107	4.49245e-105
ANXA1	12096.7	-2.34392	0.106719	-21.9635	6.42766e-107	6.44609e-105
TSTA3	6812.99	1.81091	0.0824836	21.9548	7.78904e-107	7.79378e-105
TIMELESS	2981.64	1.52715	0.0695632	21.9534	8.03072e-107	8.01755e-105
PLAC9	506.106	-3.0896	0.140749	-21.9511	8.44683e-107	8.41407e-105
RP11-823E8.3	28.4967	-2.88969	0.13172	-21.9382	1.12333e-106	1.11647e-104
AIFM2	1562.63	-1.81196	0.0826642	-21.9195	1.6919e-106	1.67781e-104
CNN1	2246.27	-3.13571	0.143136	-21.9072	2.21808e-106	2.19471e-104
DMD	1641.37	-3.01155	0.137636	-21.8806	3.97599e-106	3.92536e-104
CSRNP1	2997.65	-1.88511	0.0861965	-21.8699	5.02617e-106	4.94021e-104
MMRN2	2578.7	-1.90986	0.0873282	-21.8699	5.02498e-106	4.94021e-104
LRRC2	64.8135	-2.85741	0.13069	-21.8641	5.71223e-106	5.60215e-104
CRTAP	10932.8	-1.09871	0.0502526	-21.8638	5.74202e-106	5.61896e-104
RBMS3	1162.6	-2.19949	0.100607	-21.8622	5.95056e-106	5.81023e-104
DNAJB4	1313.32	-1.50084	0.0686818	-21.852	7.43588e-106	7.24461e-104
JAM2	1263.82	-2.06306	0.0944579	-21.8411	9.45414e-106	9.19079e-104
NATD1	1268.75	-1.68393	0.0771272	-21.8332	1.12344e-105	1.08976e-103
RP11-679B19.1	47.9361	-2.11293	0.096816	-21.8242	1.3669e-105	1.32304e-103
P4HA3	570.473	2.45527	0.112503	21.824	1.37298e-105	1.32603e-103
METTL7A	5174.53	-1.75283	0.0803355	-21.8188	1.53687e-105	1.4811e-103
SRPX	1393.15	-2.50255	0.114705	-21.8173	1.58813e-105	1.52718e-103
FAM83H	8809.4	1.79336	0.082203	21.8162	1.62889e-105	1.56299e-103
MIR22HG	841.905	-1.61243	0.0739349	-21.8087	1.91789e-105	1.83634e-103
RP11-428L9.2	505.129	6.70861	0.308002	21.7811	3.5073e-105	3.35094e-103
CEP112	454.488	-1.74575	0.0801823	-21.7723	4.24984e-105	4.05166e-103
F10	177.445	-2.54926	0.117106	-21.7687	4.5916e-105	4.36812e-103
TBX15	541.722	-2.28791	0.105153	-21.758	5.80267e-105	5.50845e-103
F12	521.217	2.87882	0.132441	21.7366	9.24423e-105	8.75679e-103
CASQ2	201.843	-3.43234	0.157957	-21.7296	1.0782e-104	1.01917e-102
PARP1	16761.8	1.2008	0.0552814	21.7216	1.28177e-104	1.20903e-102
HN1L	14473.4	1.32273	0.0609016	21.7192	1.35158e-104	1.27217e-102
HES6	538.36	2.88192	0.132701	21.7173	1.40857e-104	1.32302e-102
FABP4	12342.3	-4.90836	0.226117	-21.7072	1.75586e-104	1.64573e-102
RP11-481H12.1	41.9803	-2.74152	0.126318	-21.7033	1.90896e-104	1.78546e-102
TNNT1	1789.72	4.58045	0.211131	21.6948	2.29508e-104	2.14209e-102
ANGPTL1	332.886	-3.14632	0.145178	-21.6721	3.75872e-104	3.50081e-102
TONSL	1427.63	2.11851	0.0977797	21.6661	4.28442e-104	3.98209e-102
MAMDC2	574.067	-3.03965	0.140324	-21.6616	4.72378e-104	4.38128e-102
VKORC1L1	5366.92	-1.20689	0.055737	-21.6533	5.65352e-104	5.23268e-102
NR3C1	4067.52	-1.7139	0.0791681	-21.6489	6.23059e-104	5.75481e-102
HIST1H2AM	35.1174	3.9137	0.180838	21.642	7.22491e-104	6.65936e-102
H2AFZ	11004	1.48289	0.0685694	21.6261	1.01951e-103	9.3776e-102
LTBP4	3696.3	-1.93276	0.0893737	-21.6256	1.03171e-103	9.4702e-102
ABCC9	957.435	-2.36667	0.109446	-21.6241	1.06605e-103	9.76526e-102
TMEM246	197.521	-2.23825	0.103538	-21.6177	1.22314e-103	1.11811e-101
LIMS2	1410.38	-1.99108	0.0921148	-21.6152	1.29165e-103	1.1759e-101
ADAMTS9-AS2	60.7731	-3.17207	0.146751	-21.6153	1.2903e-103	1.1759e-101
HIST1H2BD	2427.07	2.66781	0.123433	21.6134	1.34377e-103	1.22085e-101
TPRN	2350.91	2.01587	0.0933642	21.5915	2.15992e-103	1.95834e-101
CCT3	25616.8	1.21541	0.0563058	21.5859	2.43808e-103	2.20604e-101
TNS2	5634.56	-1.64806	0.0764372	-21.5609	4.18413e-103	3.77822e-101
ENPP2	2879.7	-2.71751	0.126076	-21.5544	4.81098e-103	4.33545e-101
C2CD2	2691.23	-1.71742	0.0796919	-21.5507	5.21253e-103	4.6878e-101
CENPI	359.989	2.20304	0.102233	21.5493	5.37433e-103	4.82355e-101
HAPLN1	268.826	4.94566	0.229511	21.5487	5.4437e-103	4.87595e-101
MME	3275.07	-3.27421	0.152089	-21.5282	8.46854e-103	7.57005e-101
RP11-100L22.1	5.15786	-3.41726	0.158737	-21.5278	8.55665e-103	7.63346e-101
DPP3	3859.71	1.52174	0.0707444	21.5104	1.24358e-102	1.10719e-100
RAD51AP1	719.18	2.28461	0.106211	21.5101	1.25283e-102	1.11319e-100
GPLD1	114.945	-2.69587	0.125361	-21.5049	1.39945e-102	1.24099e-100
AC096772.6	242.811	-1.39265	0.064782	-21.4975	1.64353e-102	1.45452e-100
CEBPA	1308.68	-2.21532	0.103104	-21.4862	2.09407e-102	1.84956e-100
ATP1A2	895.09	-4.5265	0.210737	-21.4794	2.42804e-102	2.13605e-100
GPATCH11	958.812	-1.12281	0.0522735	-21.4794	2.42525e-102	2.13605e-100
LAMP5	859.565	2.9538	0.137583	21.4692	3.02186e-102	2.6532e-100
FAM228A	13.7111	-2.72146	0.126769	-21.4679	3.10805e-102	2.7235e-100
PRKAR2B	4641.46	-2.49683	0.116328	-21.4638	3.39328e-102	2.96758e-100
RP11-172E9.2	6.72969	-4.75548	0.221563	-21.4633	3.42701e-102	2.9912e-100
BMP8A	74.5752	2.41174	0.112382	21.4601	3.67281e-102	3.19945e-100
ORC6	455.235	2.55442	0.119102	21.4474	4.82386e-102	4.19392e-100
CEMIP	1250.15	3.18109	0.148559	21.413	1.01137e-101	8.77583e-100
PTRF	19318	-1.87196	0.0874676	-21.4018	1.28535e-101	1.11314e-99
EHBP1	2671.96	-1.28645	0.0601215	-21.3974	1.41148e-101	1.22e-99
SCN4B	742.45	-2.55422	0.119447	-21.3837	1.89458e-101	1.63438e-99
MLXIPL	341.662	-3.52322	0.164942	-21.3604	3.11906e-101	2.68548e-99
GTF2IRD1	2244.3	1.10046	0.0515373	21.3526	3.68724e-101	3.16853e-99
STIL	1028.67	2.09701	0.0982656	21.3402	4.80919e-101	4.12467e-99
TFR2	213.445	3.25618	0.15261	21.3366	5.19336e-101	4.44558e-99
ALDH2	7515.79	-2.28445	0.107093	-21.3315	5.79741e-101	4.95311e-99
SQLE	6040.44	2.3184	0.108686	21.3313	5.81919e-101	4.96217e-99
PTBP1	16341.4	0.67065	0.0314444	21.3281	6.22258e-101	5.29598e-99
AC004490.1	6.90099	-3.37803	0.158429	-21.322	7.09609e-101	6.02788e-99
SYNGR3	178.801	3.18762	0.149622	21.3046	1.02964e-100	8.72977e-99
CIDEC	2189.5	-5.29214	0.248625	-21.2856	1.54361e-100	1.30625e-98
H2AFX	2357.79	1.91627	0.0900758	21.274	1.97721e-100	1.66999e-98
GYS2	23.9339	-4.84157	0.227655	-21.2671	2.2895e-100	1.93009e-98
RP11-1024P17.1	48.6796	-2.2842	0.107417	-21.2649	2.40178e-100	2.02091e-98
RP11-330O11.3	20.308	-1.68499	0.079255	-21.2603	2.64649e-100	2.2226e-98
KLF9	3558.78	-1.72175	0.081002	-21.2557	2.92105e-100	2.44856e-98
CDT1	1006.5	2.49218	0.117257	21.2541	3.02282e-100	2.52909e-98
CCNE2	499.615	2.42313	0.114044	21.2474	3.48409e-100	2.90954e-98
PEAR1	571.101	-2.02817	0.0954659	-21.245	3.66585e-100	3.05559e-98
RHPN1	2761.41	2.30739	0.108632	21.2404	4.0459e-100	3.36606e-98
ANKDD1A	270.499	-1.44854	0.0682111	-21.2362	4.42343e-100	3.67326e-98
DEFB132	120.543	-4.90856	0.231231	-21.228	5.26902e-100	4.36729e-98
FLVCR1	1587.4	1.47655	0.069605	21.2133	7.2053e-100	5.96108e-98
RP11-311H10.4	6.29327	-5.19774	0.245247	-21.1939	1.08645e-99	8.97169e-98
LLGL2	5836.62	1.76652	0.0833622	21.1909	1.15802e-99	9.54493e-98
LGALS12	492.828	-4.50818	0.21278	-21.187	1.25783e-99	1.03484e-97
VGF	86.1288	4.94867	0.233622	21.1823	1.38936e-99	1.14095e-97
RP11-798K3.2	13.75	-5.43896	0.256775	-21.1818	1.40424e-99	1.15104e-97
NNAT	225.748	-3.5651	0.168359	-21.1756	1.60327e-99	1.31176e-97
HCN2	104.282	3.70861	0.175154	21.1735	1.67655e-99	1.3692e-97
CDH20	25.5466	-3.34487	0.158024	-21.1669	1.92973e-99	1.57306e-97
RNFT2	401.256	2.12112	0.100241	21.1602	2.22185e-99	1.80788e-97
KANK1	3066.63	-1.86939	0.0883544	-21.1579	2.33388e-99	1.89556e-97
CDK5	1162.25	1.41231	0.0667522	21.1575	2.35392e-99	1.90835e-97
GRM8	47.3003	2.91807	0.137949	21.1533	2.57325e-99	2.08236e-97
LAGE3	1719.15	1.98594	0.0939819	21.1311	4.11915e-99	3.3273e-97
MFAP2	2516.97	2.34908	0.111221	21.1208	5.12413e-99	4.13157e-97
FEZ2	2683.72	-0.959092	0.0454306	-21.1111	6.28321e-99	5.05696e-97
ADAM8	1334.65	2.28824	0.108397	21.1098	6.45922e-99	5.18922e-97
TMEM132C	431.639	-4.71209	0.223305	-21.1016	7.68788e-99	6.16515e-97
ARHGAP39	1550.76	1.69098	0.0801524	21.0971	8.45961e-99	6.7718e-97
CXCL11	844.79	3.75533	0.178016	21.0954	8.76688e-99	7.00515e-97
EGFEM1P	4.94512	-3.54415	0.168068	-21.0876	1.03274e-98	8.23724e-97
ALDH1L1-AS2	19.8875	-5.08539	0.241329	-21.0724	1.42531e-98	1.13481e-96
GIPC2	157.674	-2.64867	0.125706	-21.0703	1.48854e-98	1.18303e-96
CA4	163.217	-5.28021	0.250609	-21.0695	1.51448e-98	1.20149e-96
PPP4C	7255.46	1.34226	0.0637135	21.0672	1.59215e-98	1.26086e-96
E2F2	618.067	2.58078	0.122565	21.0565	1.99444e-98	1.57663e-96
ANGPTL5	18.5376	-4.12863	0.196175	-21.0457	2.5038e-98	1.97578e-96
ZNF695	140.3	3.20486	0.152305	21.0423	2.68764e-98	2.11709e-96
HADH	4963.36	-1.30676	0.0621281	-21.0333	3.25471e-98	2.55924e-96
PKHD1L1	66.9038	-3.72166	0.177057	-21.0196	4.3431e-98	3.40903e-96
CES1	1522.63	-3.77473	0.1796	-21.0174	4.54418e-98	3.56057e-96
PPP2R1B	2471.82	-1.48868	0.0708595	-21.0089	5.43282e-98	4.24463e-96
RP11-116B13.1	3.64877	-3.43023	0.163275	-21.0089	5.43632e-98	4.24463e-96
ARHGEF15	1034.56	-1.84609	0.0879006	-21.002	6.28746e-98	4.90057e-96
ARF1	40506.6	1.07412	0.0512144	20.9729	1.15947e-97	9.0213e-96
GBE1	2187.88	-1.55131	0.0739799	-20.9694	1.24778e-97	9.69143e-96
HID1-AS1	14.5749	-2.21491	0.105639	-20.9667	1.3198e-97	1.0233e-95
GIMAP8	984.12	-1.8649	0.0889542	-20.9647	1.37804e-97	1.06659e-95
ISG15	7094.19	3.53061	0.168427	20.9623	1.44878e-97	1.11939e-95
ATP6V0B	8330.36	1.36983	0.0653955	20.9469	2.00291e-97	1.54485e-95
CENPK	323.959	1.89931	0.0906947	20.9418	2.22833e-97	1.71574e-95
CNRIP1	612.813	-1.77965	0.0849869	-20.9403	2.29978e-97	1.76769e-95
PROC	52.3625	2.57237	0.122929	20.9257	3.12507e-97	2.39788e-95
PDLIM3	2940.75	-2.46748	0.117959	-20.9181	3.66406e-97	2.8066e-95
RP11-394O4.5	721.331	-2.9465	0.140878	-20.9153	3.88363e-97	2.96967e-95
RP11-158M2.3	25.6718	-2.00932	0.0960877	-20.9113	4.22827e-97	3.22765e-95
MRAS	2889.27	-2.22176	0.10637	-20.8872	6.99707e-97	5.33206e-95
DENND2A	384.098	-2.17544	0.104167	-20.8842	7.4517e-97	5.66878e-95
GSTM5	543.061	-3.74335	0.179258	-20.8825	7.72692e-97	5.8681e-95
KLHL29	403.832	-2.48884	0.119366	-20.8505	1.50797e-96	1.14325e-94
STRBP	3877.05	1.11844	0.0536427	20.8498	1.52978e-96	1.15781e-94
OXCT1-AS1	20.6903	-2.30048	0.110364	-20.8444	1.71298e-96	1.29426e-94
FBXO43	68.4898	2.39626	0.114999	20.8373	1.9866e-96	1.49591e-94
LINC00968	53.8573	-3.79733	0.182236	-20.8374	1.98325e-96	1.49591e-94
MICU3	143.689	-2.25476	0.108216	-20.8357	2.05416e-96	1.54417e-94
ARTN	269.585	3.20837	0.15403	20.8295	2.33964e-96	1.75579e-94
UGP2	8103.27	-1.28201	0.0615627	-20.8244	2.60191e-96	1.94933e-94
RP11-51B23.3	6.47729	-2.35795	0.113236	-20.8234	2.65858e-96	1.98843e-94
AUNIP	247.15	2.21695	0.10647	20.8223	2.71828e-96	2.02966e-94
RBPMS-AS1	49.5202	-2.11535	0.101635	-20.8131	3.29258e-96	2.45435e-94
FOXD3-AS1	140.448	4.42508	0.21279	20.7955	4.75189e-96	3.53622e-94
TK2	2317.21	-1.10124	0.0530059	-20.7757	7.181e-96	5.33495e-94
MYT1	223.391	4.91754	0.2367	20.7754	7.22799e-96	5.3609e-94
HIST1H2BO	31.3671	4.35583	0.209708	20.7709	7.93564e-96	5.87595e-94
CGA	571.81	8.13408	0.3917	20.7661	8.7681e-96	6.48154e-94
MESTIT1	30.2391	-2.67368	0.128754	-20.7658	8.81818e-96	6.50773e-94
SLC52A2	4487.63	1.80852	0.0871989	20.7401	1.50534e-95	1.10908e-93
MISP	2420.39	3.25075	0.156824	20.7286	1.91119e-95	1.40577e-93
KIF24	587.664	1.57575	0.0760626	20.7165	2.45922e-95	1.80588e-93
INTS7	2819.52	1.22104	0.0589512	20.7127	2.65983e-95	1.94997e-93
ECSCR	16.4148	-1.39781	0.0675036	-20.7072	2.98527e-95	2.18495e-93
STX11	281.532	-2.15326	0.104025	-20.6995	3.50241e-95	2.55923e-93
WBSCR28	25.9166	4.35809	0.210741	20.6799	5.25969e-95	3.83698e-93
AC003986.6	17.6225	-3.36943	0.162947	-20.678	5.46279e-95	3.97861e-93
FAM180B	33.2911	-4.01675	0.194308	-20.672	6.18488e-95	4.49715e-93
IL17D	105.971	-2.0346	0.0984386	-20.6687	6.6271e-95	4.81082e-93
FEN1	2405.43	1.63127	0.0789364	20.6656	7.07125e-95	5.12487e-93
FAM122A	1622.97	-0.909549	0.0440238	-20.6604	7.87429e-95	5.69758e-93
PCNA	6965.06	1.40773	0.068184	20.646	1.05942e-94	7.65318e-93
ALDH1A1	2043	-2.538	0.123007	-20.6329	1.38971e-94	1.00228e-92
CXCL10	3152.15	3.61349	0.175169	20.6286	1.51911e-94	1.09383e-92
TOR3A	4251.9	1.02837	0.0498597	20.6252	1.62999e-94	1.17178e-92
TMEM206	816.632	1.41572	0.0686726	20.6155	1.99163e-94	1.42944e-92
ACTL8	156.571	7.01312	0.34024	20.6123	2.1305e-94	1.52664e-92
FAM149A	241.737	-2.15178	0.104395	-20.612	2.14206e-94	1.53245e-92
RIPPLY3	195.471	3.17503	0.154057	20.6094	2.26165e-94	1.61541e-92
C20orf194	1511.64	-1.21615	0.0590172	-20.6068	2.38667e-94	1.70196e-92
RP11-517I3.2	142.231	-1.99295	0.0968109	-20.586	3.664e-94	2.60866e-92
CTC-297N7.9	12.2348	-2.25987	0.109785	-20.5844	3.78805e-94	2.69267e-92
PRR11	1111.93	2.59503	0.126085	20.5815	4.01957e-94	2.85267e-92
GNAL	443.556	-2.06739	0.100472	-20.5768	4.43067e-94	3.13942e-92
PREX2	747.844	-2.33583	0.113595	-20.5628	5.91649e-94	4.18554e-92
PYGO2	5896.49	0.94712	0.0460785	20.5545	7.01566e-94	4.95525e-92
GGTA1P	624.864	-2.06302	0.100534	-20.5206	1.41021e-93	9.94466e-92
CFAP45	349.893	2.69429	0.131324	20.5164	1.53742e-93	1.08245e-91
MATN3	1513.03	2.82897	0.137904	20.5141	1.61247e-93	1.1335e-91
HSPA12A	879.513	-1.95115	0.0951504	-20.5059	1.90647e-93	1.33805e-91
PSRC1	661.511	1.86321	0.0909416	20.488	2.75436e-93	1.93009e-91
PGM5P4	5.28166	-3.31858	0.162126	-20.4692	4.05429e-93	2.83654e-91
LEF1-AS1	24.2325	2.41682	0.118128	20.4594	4.95587e-93	3.46186e-91
GINS2	1211.6	2.15967	0.10559	20.4534	5.60441e-93	3.90875e-91
RP11-742B18.1	27.6811	5.08506	0.248693	20.4471	6.37081e-93	4.4363e-91
ANK2	1145.85	-2.35608	0.115292	-20.4358	8.03552e-93	5.58676e-91
WDR34	5344.52	1.58064	0.0774237	20.4155	1.21824e-92	8.4567e-91
ARHGEF7-AS2	2.58446	-3.05023	0.149654	-20.3819	2.42008e-92	1.67733e-90
PRRT4	103.984	-3.62482	0.177943	-20.3706	3.04797e-92	2.10922e-90
HTR1D	71.3607	3.64671	0.179059	20.366	3.35255e-92	2.31639e-90
C19orf80	31.059	-3.9189	0.192448	-20.3634	3.5325e-92	2.43693e-90
S1PR1	1792.03	-2.03048	0.0997363	-20.3585	3.9049e-92	2.68966e-90
PYCRL	1935.46	1.82393	0.0896171	20.3525	4.41104e-92	3.03358e-90
POLE2	375.756	1.5371	0.0755363	20.3492	4.71944e-92	3.24066e-90
EBF2	310.744	-2.28357	0.112276	-20.339	5.81451e-92	3.98644e-90
ADH1B	9681.2	-5.12077	0.251792	-20.3373	6.01928e-92	4.12047e-90
CACHD1	1125.96	-2.11094	0.103807	-20.3352	6.28222e-92	4.29385e-90
PID1	467.161	-2.47995	0.121957	-20.3347	6.34862e-92	4.33257e-90
MGLL	6652.37	-2.22304	0.109348	-20.3298	7.00266e-92	4.77158e-90
ATP6AP1	17378	1.23625	0.0608196	20.3265	7.49132e-92	5.09674e-90
STAT5B	5069.36	-1.19851	0.0590347	-20.3018	1.2398e-91	8.42211e-90
FAM13C	183.697	-2.25908	0.111297	-20.2979	1.34277e-91	9.10765e-90
CBX4	3273.27	1.71313	0.0844085	20.2957	1.40341e-91	9.50444e-90
AL035610.1	46.9274	-4.30693	0.212281	-20.2888	1.61495e-91	1.09204e-89
P3H4	2444.1	1.57818	0.077797	20.2859	1.71239e-91	1.15618e-89
TIMM17A	4552.01	1.11988	0.0552179	20.281	1.89107e-91	1.27488e-89
HDGF	24851.3	1.23132	0.0607289	20.2757	2.1087e-91	1.41944e-89
LILRB5	309.617	-2.79327	0.137801	-20.2703	2.35025e-91	1.57965e-89
ESYT1	10356.1	-1.04551	0.0515867	-20.2671	2.51151e-91	1.68548e-89
ISG20L2	4474.04	0.908467	0.0448279	20.2656	2.58527e-91	1.73237e-89
GYPC	1497.81	-1.93437	0.0954714	-20.2612	2.82915e-91	1.89293e-89
FBXL6	1599.59	1.78327	0.0880195	20.2599	2.90609e-91	1.94149e-89
RTKN2	566.147	2.02686	0.100059	20.2567	3.10355e-91	2.07029e-89
SLC25A22	2029.45	1.55834	0.0769408	20.2537	3.29555e-91	2.19507e-89
KNOP1	1956.39	1.0656	0.0526433	20.242	4.18071e-91	2.78048e-89
NAT8L	1054.32	-3.21541	0.158866	-20.2397	4.37416e-91	2.90479e-89
BNIP2	3598.17	-0.907246	0.044846	-20.2302	5.30387e-91	3.51694e-89
BMX	111.954	-2.70522	0.133783	-20.221	6.39572e-91	4.23461e-89
PECAM1	11811.3	-1.64437	0.0813256	-20.2196	6.57863e-91	4.34924e-89
KCTD5	2550.01	1.08872	0.053863	20.2128	7.56131e-91	4.99148e-89
EIF2AK1	14785.7	0.877131	0.0434005	20.2101	7.97096e-91	5.25409e-89
EGFLAM	790.233	-1.75662	0.0869205	-20.2095	8.06834e-91	5.3104e-89
MYH11	7515.15	-3.20404	0.158627	-20.1986	1.0075e-90	6.62131e-89
TAL1	200.069	-1.9532	0.0967127	-20.1959	1.06415e-90	6.98328e-89
AMOTL2	4752.79	-1.47612	0.0731611	-20.1764	1.5795e-90	1.03499e-88
SDS	689.769	2.29453	0.11379	20.1645	2.00648e-90	1.31284e-88
LINC01230	43.2929	-4.7303	0.234586	-20.1644	2.01083e-90	1.31375e-88
HNRNPAB	10329.1	1.07086	0.0531151	20.1611	2.15139e-90	1.40352e-88
CRB3	887.465	1.60272	0.0795594	20.145	2.97941e-90	1.94085e-88
AFAP1L1	830.657	-1.58941	0.0789222	-20.1389	3.36544e-90	2.18911e-88
PRCC	5860.71	0.960118	0.0476902	20.1324	3.83872e-90	2.49332e-88
TUBA1C	5693.6	1.43026	0.0710631	20.1266	4.31402e-90	2.79794e-88
TSPAN7	859.985	-2.4837	0.123422	-20.1237	4.5793e-90	2.96567e-88
EMP1	13174.1	-1.88558	0.0937333	-20.1164	5.29952e-90	3.4271e-88
LDLRAD2	114.116	-1.88545	0.0937897	-20.1029	6.95682e-90	4.4923e-88
AC011738.4	13.523	-3.19105	0.15876	-20.0998	7.41195e-90	4.77926e-88
ESR2	46.9413	-2.09899	0.10444	-20.0976	7.74715e-90	4.98815e-88
ST6GALNAC3	190.882	-1.91277	0.0952035	-20.0913	8.78708e-90	5.64954e-88
AQP1	9930.91	-2.09771	0.104413	-20.0904	8.94651e-90	5.74373e-88
C19orf40	374.426	1.17251	0.0583636	20.0897	9.07475e-90	5.81766e-88
DIAPH3	656.194	2.28364	0.113742	20.0774	1.16222e-89	7.44005e-88
CAMK1	248.539	-1.45419	0.0724297	-20.0772	1.16779e-89	7.46494e-88
DQX1	131.571	3.9071	0.194635	20.0739	1.24782e-89	7.96508e-88
FHL5	148.416	-2.64459	0.131828	-20.0609	1.62099e-89	1.03323e-87
RP11-1101K5.1	8.09059	-5.26856	0.262683	-20.0567	1.76428e-89	1.12295e-87
FAM72D	38.8309	2.95034	0.14711	20.0553	1.81301e-89	1.15231e-87
FAM162B	51.3298	-2.1443	0.106929	-20.0535	1.88104e-89	1.19384e-87
MBOAT7	7451.21	1.44677	0.0721488	20.0526	1.91545e-89	1.21395e-87
METTL11B	11.7973	5.39182	0.269042	20.0408	2.4261e-89	1.53539e-87
LSM4	5803.42	1.39781	0.0697859	20.03	3.01551e-89	1.90569e-87
AC093110.3	50.9738	-2.54483	0.127061	-20.0283	3.11937e-89	1.96853e-87
FAM72A	82.6336	2.40637	0.120163	20.0258	3.27924e-89	2.06648e-87
MCM2	3898.76	1.80296	0.0900433	20.0233	3.45088e-89	2.17156e-87
AP1S1	3197.3	1.24339	0.0621012	20.022	3.54118e-89	2.22523e-87
APOA1BP	7281.77	1.33118	0.0665091	20.0151	4.07123e-89	2.5547e-87
GPRASP1	518.133	-2.0428	0.102105	-20.0068	4.80401e-89	3.01026e-87
CDC20B	291.013	6.58915	0.329366	20.0056	4.9242e-89	3.08123e-87
SPATA9	28.4956	-1.72221	0.0861017	-20.0021	5.28226e-89	3.30063e-87
NVL	2794.45	1.32903	0.0664552	19.9989	5.62642e-89	3.51074e-87
RP11-71E19.1	7.99799	-3.87648	0.193869	-19.9954	6.04256e-89	3.76511e-87
MARCKSL1	21796	1.46927	0.0734847	19.9942	6.18759e-89	3.85008e-87
CLIC5	566.482	-2.46228	0.123242	-19.9792	8.36276e-89	5.19625e-87
PALM2-AKAP2	50.9288	-2.82364	0.141453	-19.9617	1.18673e-88	7.36354e-87
LINC01140	141.596	-2.3567	0.118071	-19.9601	1.22367e-88	7.58216e-87
SAMD14	124.637	1.86185	0.0933371	19.9476	1.57265e-88	9.73096e-87
SAPCD2	1269.99	2.26082	0.113349	19.9457	1.6339e-88	1.00959e-86
MYLK	9853.58	-2.20389	0.110522	-19.9407	1.80541e-88	1.11401e-86
TYMS	1589.26	2.0253	0.101574	19.9391	1.8627e-88	1.14777e-86
TMEM8A	4265.9	1.32732	0.0665979	19.9303	2.22069e-88	1.36646e-86
HIST1H3D	123.27	3.36008	0.168624	19.9265	2.39813e-88	1.4736e-86
ITPKA	84.3384	3.36161	0.168723	19.9239	2.52523e-88	1.54956e-86
AC011893.3	11.9917	4.09347	0.205488	19.9208	2.68908e-88	1.64783e-86
ERG	1087.22	-1.67043	0.0838546	-19.9205	2.70023e-88	1.65238e-86
KL	166.361	-2.48308	0.124674	-19.9166	2.92354e-88	1.78658e-86
ORC1	391.801	2.28784	0.114881	19.9149	3.0196e-88	1.84274e-86
SOX17	273.793	-2.18817	0.109976	-19.8968	4.33387e-88	2.64116e-86
MUC2	627.877	7.5624	0.380122	19.8946	4.52763e-88	2.75546e-86
SYNPO2	4334.18	-2.56712	0.129048	-19.8927	4.70432e-88	2.85908e-86
RTBDN	71.7945	5.55953	0.27967	19.8789	6.19708e-88	3.76117e-86
TPD52	15779.4	1.89602	0.0953823	19.8781	6.301e-88	3.81902e-86
CDKN1C	1051.65	-2.09533	0.105415	-19.8769	6.44792e-88	3.90275e-86
IL4I1	648.255	2.70117	0.135912	19.8743	6.78627e-88	4.10196e-86
CYP2U1	671.784	-1.42412	0.071664	-19.8722	7.08339e-88	4.27573e-86
PPP1R1A	1573.89	-3.88092	0.195363	-19.8652	8.13944e-88	4.90652e-86
MRAP	75.2762	-4.48952	0.226	-19.8651	8.15916e-88	4.91175e-86
PGM5P3-AS1	4.75399	-3.75632	0.189136	-19.8604	8.95723e-88	5.38488e-86
B4GALT1-AS1	61.4226	-1.67334	0.0842785	-19.8549	9.99771e-88	6.00228e-86
TCEAL7	135.641	-2.15135	0.10836	-19.8538	1.02136e-87	6.12363e-86
TMPO-AS1	180.541	1.76988	0.0891517	19.8524	1.05067e-87	6.29083e-86
PLK4	668.172	1.75385	0.0884037	19.8391	1.36956e-87	8.18917e-86
SYT13	3811.47	4.99974	0.252033	19.8376	1.40956e-87	8.41698e-86
ZNF668	345.14	1.05074	0.0529762	19.8342	1.50942e-87	9.00121e-86
PROS1	1614.37	-1.95221	0.0985228	-19.8148	2.21994e-87	1.32206e-85
SCTR	12.1558	-3.06009	0.154487	-19.808	2.53878e-87	1.50991e-85
TUFT1	3637.55	1.4999	0.0757779	19.7933	3.39871e-87	2.01864e-85
MTHFD2	6078.14	1.47715	0.0746364	19.7913	3.54126e-87	2.1005e-85
NME1	4139.62	1.9347	0.0977883	19.7846	4.03949e-87	2.39283e-85
EMCN	1248.76	-1.93061	0.0976406	-19.7726	5.12509e-87	3.03185e-85
MAB21L1	114.829	-2.71722	0.13743	-19.7717	5.21852e-87	3.08302e-85
C3orf80	255.541	1.94331	0.0983166	19.7658	5.86332e-87	3.45936e-85
AC097724.3	55.2631	-2.12501	0.107516	-19.7646	6.01308e-87	3.54301e-85
SLC12A8	1342.37	1.53652	0.0777739	19.7562	7.09551e-87	4.17526e-85
HNRNPA1P21	76.4217	2.97784	0.150777	19.75	8.02745e-87	4.7174e-85
LRRC70	44.609	-2.07892	0.105278	-19.7469	8.53423e-87	5.00859e-85
HSPB2	89.8584	-2.52627	0.127936	-19.7463	8.6246e-87	5.05495e-85
MAOA	2815.31	-3.33324	0.168835	-19.7426	9.2913e-87	5.43853e-85
COL6A6	295.738	-3.21961	0.163085	-19.7419	9.41819e-87	5.50555e-85
EDNRB	854.011	-2.16868	0.109871	-19.7384	1.00852e-86	5.88772e-85
RP11-474O21.5	19.7973	-2.43326	0.123278	-19.7381	1.0157e-86	5.92185e-85
PKD2	1868.89	-1.46379	0.0741708	-19.7354	1.0715e-86	6.23902e-85
ST6GALNAC6	3327.06	-1.20379	0.0610218	-19.7271	1.26085e-86	7.33191e-85
NOTCH4	1688.82	-1.50346	0.0762336	-19.7218	1.40191e-86	8.14154e-85
C21orf58	562.758	1.71833	0.0871483	19.7173	1.53099e-86	8.87957e-85
B4GALT3	4647.5	1.23348	0.0625779	19.7111	1.73051e-86	1.00236e-84
GRAMD1A	5553.48	1.08364	0.0549944	19.7045	1.97379e-86	1.14179e-84
SH3BGRL2	1391.24	-1.93425	0.0981748	-19.7021	2.07025e-86	1.19604e-84
PGM5P4-AS1	3.17845	-3.60829	0.18316	-19.7002	2.14826e-86	1.23949e-84
RP11-108L7.15	37.2407	2.07629	0.1054	19.6992	2.19066e-86	1.26231e-84
RAB8A	2954.34	0.811811	0.0412267	19.6914	2.55644e-86	1.47118e-84
MCM4	8429.62	1.80705	0.091789	19.687	2.78706e-86	1.60182e-84
RHPN1-AS1	300.104	1.81476	0.0921932	19.6843	2.93828e-86	1.68655e-84
EOGT	1432.34	-1.31014	0.0665662	-19.6818	3.09084e-86	1.77183e-84
PDP2	981.919	-1.20126	0.061047	-19.6777	3.34919e-86	1.91745e-84
CETP	125.274	-2.24278	0.113987	-19.6758	3.47344e-86	1.98603e-84
BRIP1	692.692	2.19686	0.111686	19.67	3.89484e-86	2.22411e-84
PTPRB	2135.45	-1.87743	0.095453	-19.6687	4.00104e-86	2.28183e-84
TMEM132A	6070.72	2.1973	0.11172	19.668	4.05724e-86	2.31091e-84
CDH5	3203.06	-1.63914	0.0833497	-19.6658	4.23118e-86	2.4069e-84
KCTD12	6923.57	-1.63217	0.0830068	-19.6631	4.47014e-86	2.53957e-84
LINC01485	36.8775	-3.90579	0.198734	-19.6533	5.41634e-86	3.07321e-84
TMEM145	252.121	3.79983	0.19335	19.6526	5.48753e-86	3.10963e-84
OLR1	1178.17	2.22065	0.113037	19.6453	6.34001e-86	3.58812e-84
ADM2	894.061	2.19698	0.111845	19.6431	6.62435e-86	3.74428e-84
APOLD1	2584.24	-2.07636	0.105749	-19.6348	7.80067e-86	4.40356e-84
ADIPOQ	7268.61	-5.21147	0.265615	-19.6204	1.03541e-85	5.8376e-84
ODF2	4219.4	0.947678	0.0483248	19.6106	1.2556e-85	7.07001e-84
ATAD2	5045.66	1.96406	0.100164	19.6085	1.30758e-85	7.35338e-84
FGF1	1065.64	-2.08086	0.106182	-19.5972	1.63422e-85	9.17869e-84
RP11-571L19.8	41.4606	-1.47455	0.075254	-19.5943	1.72836e-85	9.69519e-84
DNAH14	765.081	1.55641	0.0794528	19.5891	1.91371e-85	1.07214e-83
TMEM255A	213.848	-2.24276	0.114545	-19.5797	2.30326e-85	1.28875e-83
FLAD1	3737.96	1.24542	0.0636291	19.5732	2.61896e-85	1.46355e-83
EZR	23914.7	1.29793	0.066369	19.5563	3.64473e-85	2.03423e-83
USHBP1	188.379	-1.87452	0.0958655	-19.5537	3.83854e-85	2.13971e-83
IL21R	294.333	2.6483	0.135442	19.553	3.8904e-85	2.1659e-83
CLCN6	1044.39	-0.978906	0.0500675	-19.5517	3.98743e-85	2.21714e-83
ANGPT1	431.508	-2.78001	0.142211	-19.5485	4.24797e-85	2.35905e-83
MGARP	24.7624	-2.31059	0.118214	-19.5458	4.47542e-85	2.48227e-83
DDX39A	3782.09	1.50601	0.0770677	19.5414	4.88355e-85	2.70526e-83
TRHDE	63.8894	-4.06807	0.208178	-19.5413	4.8944e-85	2.70789e-83
DCTPP1	3136.47	1.2673	0.0648713	19.5356	5.46603e-85	3.02039e-83
ITPRIPL1	188.859	-2.35624	0.120655	-19.5288	6.24887e-85	3.44868e-83
ADD3-AS1	13.1481	-2.31076	0.118343	-19.526	6.60011e-85	3.63801e-83
BLM	609.884	1.98667	0.101746	19.5258	6.62761e-85	3.64863e-83
ELTD1	2079.06	-1.6704	0.0855529	-19.5248	6.75618e-85	3.71481e-83
EIF4EBP2	12545.3	-1.03088	0.0528066	-19.5217	7.17956e-85	3.94272e-83
ALAS2	9.15712	-3.38931	0.173792	-19.5022	1.0526e-84	5.77332e-83
NKAIN1	2670.41	3.99047	0.20465	19.499	1.11876e-84	6.12863e-83
AC009133.12	344.462	1.15668	0.0593281	19.4963	1.18101e-84	6.46164e-83
HIST1H2BH	96.3937	3.3194	0.170348	19.486	1.44412e-84	7.89148e-83
MTMR10	1862.02	-1.0905	0.0559755	-19.4817	1.56839e-84	8.56004e-83
CCL14	194.006	-3.31403	0.170192	-19.4723	1.88651e-84	1.02837e-82
IRF7	2517.35	1.94996	0.100155	19.4695	1.99227e-84	1.08469e-82
SPATA20P1	13.6788	4.57414	0.234964	19.4674	2.07544e-84	1.12859e-82
COX6C	33989.4	2.78535	0.143136	19.4595	2.41997e-84	1.31433e-82
RP11-547D24.1	13.6269	2.7055	0.139052	19.4568	2.55476e-84	1.38584e-82
RP11-64C12.8	7.53586	-3.29232	0.169225	-19.4553	2.62669e-84	1.42312e-82
CA3	328.088	-3.7926	0.194981	-19.4511	2.85065e-84	1.54258e-82
2020-03-04	36.5252	4.06893	0.209251	19.4452	3.20105e-84	1.73009e-82
CRY2	3263.01	-1.19699	0.0615726	-19.4402	3.5247e-84	1.90039e-82
FFAR4	112.232	-2.03589	0.104725	-19.4403	3.52374e-84	1.90039e-82
CCDC178	54.2127	-3.00536	0.154652	-19.433	4.06124e-84	2.18702e-82
HELLS	1051.54	1.73754	0.0894305	19.4289	4.39743e-84	2.36519e-82
CKMT2	132.081	-2.31014	0.11896	-19.4195	5.27816e-84	2.83546e-82
ALDH18A1	8088.17	1.03255	0.0532022	19.408	6.60743e-84	3.54527e-82
SAMD5	503.611	-2.98442	0.153819	-19.4022	7.39362e-84	3.96232e-82
COX7A1	614.448	-2.51459	0.129607	-19.4017	7.46011e-84	3.99314e-82
DNA2	567.486	1.69407	0.0873192	19.4009	7.58117e-84	4.05305e-82
RCC2	13119.7	1.05828	0.0545655	19.3947	8.56233e-84	4.5721e-82
CBX3	14508.1	0.988736	0.0509876	19.3917	9.07149e-84	4.83816e-82
FREM1	359.884	-2.95031	0.152151	-19.3907	9.24966e-84	4.92727e-82
RP11-389C8.2	259.24	-1.62526	0.0838215	-19.3895	9.46234e-84	5.03453e-82
TNFRSF18	540.086	2.92915	0.151183	19.3749	1.25642e-83	6.67691e-82
CCDC36	50.926	-2.0496	0.105809	-19.3707	1.36496e-83	7.24506e-82
TMEM220-AS1	36.7767	-2.03375	0.10501	-19.3672	1.45981e-83	7.73928e-82
TSLP	50.2343	-3.24416	0.167532	-19.3644	1.5401e-83	8.15517e-82
ECE2	775.874	1.95804	0.101142	19.3594	1.69837e-83	8.98254e-82
DHDDS	2584.98	-0.890835	0.0460252	-19.3554	1.83693e-83	9.70386e-82
TRIB3	2752.36	1.67951	0.0867842	19.3527	1.93548e-83	1.02123e-81
VAMP3	5821.03	-0.778769	0.0402448	-19.3508	2.00717e-83	1.0578e-81
LHX2	49.9055	4.43107	0.229112	19.3402	2.46566e-83	1.29789e-81
FAM126A	1312.68	-1.90113	0.0983201	-19.3361	2.67026e-83	1.40392e-81
CENPL	654.819	1.36256	0.0704703	19.3352	2.71422e-83	1.42535e-81
IGSF9	3132.9	1.97751	0.102323	19.3262	3.23464e-83	1.69664e-81
ESRP1	9413.02	1.63051	0.0844392	19.3098	4.44112e-83	2.32672e-81
CCM2L	241.559	-1.66837	0.0864816	-19.2916	6.31904e-83	3.30666e-81
CPA1	19.6811	-4.17859	0.216624	-19.2896	6.57179e-83	3.43488e-81
FMO2	2142.96	-3.23026	0.16759	-19.2747	8.75226e-83	4.56917e-81
AC002066.1	6.02531	-3.53298	0.183397	-19.2641	1.07484e-82	5.60471e-81
THSD1	373.363	-1.46158	0.0758792	-19.2619	1.12253e-82	5.8465e-81
LSR	8781.46	1.58962	0.0825537	19.2556	1.26669e-82	6.58959e-81
MMRN1	665.91	-3.33497	0.173205	-19.2545	1.29541e-82	6.73116e-81
C9orf172	316.159	2.0348	0.105694	19.2519	1.36099e-82	7.06363e-81
CTD-2171N6.1	115.726	3.53306	0.183551	19.2484	1.45722e-82	7.55426e-81
RCBTB2	862.305	-1.17551	0.0611009	-19.2389	1.74915e-82	9.05707e-81
PQLC2L	104.707	-2.91166	0.151373	-19.235	1.88477e-82	9.74791e-81
RP11-703I16.3	15.3168	3.33357	0.173319	19.2337	1.93168e-82	9.97894e-81
ERICH4	2.98799	-2.7885	0.145072	-19.2216	2.44351e-82	1.26084e-80
FBXL19	1797.03	1.27499	0.0663341	19.2208	2.48068e-82	1.27853e-80
NRN1	1054.26	-2.23649	0.116461	-19.2039	3.43619e-82	1.76894e-80
RBMS3-AS3	8.38475	-2.77231	0.144384	-19.201	3.63108e-82	1.86711e-80
PFKFB3	9235.71	-1.98991	0.103653	-19.1979	3.85523e-82	1.98007e-80
C10orf10	6057.68	-2.23502	0.11644	-19.1945	4.11371e-82	2.11039e-80
CAMP	80.688	4.04096	0.210622	19.1859	4.85754e-82	2.48911e-80
CBLN2	700.217	5.90853	0.30797	19.1854	4.90255e-82	2.50928e-80
C5orf66-AS1	42.6911	6.01783	0.313754	19.1801	5.42845e-82	2.77525e-80
CEACAM5	2651.79	5.32122	0.277445	19.1794	5.50185e-82	2.80955e-80
FP325317.1	35.1029	-5.33869	0.278616	-19.1615	7.7633e-82	3.95982e-80
KISS1R	75.3697	4.54033	0.236998	19.1577	8.35036e-82	4.25437e-80
PRR36	2154.2	2.21722	0.115748	19.1556	8.6931e-82	4.42392e-80
PRCD	44.337	-1.88608	0.0984672	-19.1544	8.88721e-82	4.51753e-80
DSCAM-AS1	885.337	7.02302	0.366817	19.1458	1.04817e-81	5.32196e-80
XRCC2	457.977	1.87441	0.0979327	19.1397	1.17866e-81	5.97766e-80
MPRIP	8192.25	-0.932131	0.0487093	-19.1366	1.25161e-81	6.34041e-80
SH3GLB1	7841.03	-0.852265	0.0445448	-19.1328	1.34743e-81	6.81804e-80
PRAME	1669.76	5.9037	0.308581	19.1318	1.3732e-81	6.94054e-80
SYNDIG1	432.575	2.82522	0.147741	19.1228	1.63086e-81	8.23344e-80
TEK	943.825	-1.87125	0.0978861	-19.1167	1.83495e-81	9.25327e-80
CIDEA	615.13	-4.95917	0.259424	-19.1161	1.85466e-81	9.34205e-80
AP001627.1	12.8007	-3.01928	0.157962	-19.1139	1.93363e-81	9.72883e-80
JTB	10106.1	1.1161	0.0583973	19.1122	1.99971e-81	1.00499e-79
ALDH1A2	257.75	-2.81542	0.147319	-19.1111	2.0414e-81	1.02479e-79
TTC28	1613.64	-1.42608	0.074644	-19.1051	2.28844e-81	1.1475e-79
FOXP3	350.539	2.16281	0.113312	19.0873	3.2216e-81	1.6136e-79
VAV2	3722.72	1.0939	0.0573156	19.0855	3.33364e-81	1.66783e-79
RP11-384P7.7	28.9179	-3.24479	0.170121	-19.0734	4.20124e-81	2.09953e-79
CCDC141	46.4627	-2.69509	0.14134	-19.0681	4.65257e-81	2.32247e-79
AVPR2	92.8224	-2.75372	0.14444	-19.0648	4.95406e-81	2.47019e-79
FAM89A	546.444	-2.49439	0.130948	-19.0487	6.72974e-81	3.35182e-79
CTD-2033D24.2	2.7766	-3.47464	0.182584	-19.0303	9.56888e-81	4.76055e-79
RP11-64C12.1	5.97282	-3.70371	0.19463	-19.0295	9.70957e-81	4.82513e-79
AGAP11	14.8287	-2.77472	0.145835	-19.0265	1.02967e-80	5.11118e-79
RP4-635E18.7	16.748	-1.81023	0.0951444	-19.0261	1.0362e-80	5.13784e-79
RP11-276H19.1	68.2424	-2.2205	0.116743	-19.0204	1.15578e-80	5.7244e-79
ARHGEF39	380.375	1.75967	0.0925432	19.0146	1.29132e-80	6.38858e-79
MIR497HG	94.1365	-1.91841	0.100921	-19.0091	1.43426e-80	7.08788e-79
ARID5B	5199.2	-1.51146	0.0795185	-19.0077	1.47408e-80	7.27655e-79
CEACAM6	11394.3	4.77952	0.25146	19.0071	1.48966e-80	7.34531e-79
CAMK2N2	57.3106	3.13854	0.165164	19.0026	1.62345e-80	7.99611e-79
LRTM2	100.727	5.53953	0.29153	19.0016	1.65571e-80	8.14597e-79
PHLDB1	4989.88	-1.32403	0.069706	-18.9944	1.89576e-80	9.31668e-79
TEF	1875.08	-1.37923	0.0726525	-18.984	2.31348e-80	1.1357e-78
CSAG1	43.7136	8.31839	0.438381	18.9753	2.73201e-80	1.33968e-78
DLC1	3176.85	-1.7901	0.0943737	-18.9682	3.12304e-80	1.52974e-78
HIST1H2AD	85.8	3.38931	0.178691	18.9674	3.17176e-80	1.55189e-78
RPUSD1	1728.04	1.39157	0.0734005	18.9586	3.7532e-80	1.83436e-78
CERS2	19315.1	1.31888	0.0695783	18.9553	3.99461e-80	1.9502e-78
RNF150	1102.45	-2.64334	0.13948	-18.9514	4.30274e-80	2.09833e-78
WASF3	820.015	-2.1701	0.114522	-18.9493	4.47417e-80	2.17954e-78
RECK	1133.35	-1.75891	0.0928259	-18.9485	4.54121e-80	2.20978e-78
pk	5264.88	-1.51216	0.0798223	-18.944	4.94637e-80	2.40429e-78
TUSC5	2099.6	-5.06892	0.26776	-18.9308	6.35632e-80	3.08625e-78
CTD-2510F5.4	126.876	2.58536	0.136579	18.9294	6.52501e-80	3.1647e-78
EPB41L2	4659.73	-1.6698	0.0882365	-18.9241	7.22156e-80	3.49872e-78
PER1	3014.49	-2.0595	0.108852	-18.9202	7.77165e-80	3.76113e-78
RHOQP2	12.2431	-1.74696	0.0924324	-18.8999	1.14353e-79	5.52813e-78
RP5-826L7.1	1.88904	-2.70412	0.143104	-18.8962	1.22617e-79	5.9212e-78
ARHGEF40	3034.21	-1.25525	0.0664341	-18.8947	1.2602e-79	6.07894e-78
HIF3A	152.383	-3.70489	0.196098	-18.8931	1.30033e-79	6.26569e-78
APCDD1	1708.75	-2.14829	0.113709	-18.8928	1.3069e-79	6.29055e-78
MAPK8IP2	1929.82	2.73372	0.144697	18.8928	1.30842e-79	6.29105e-78
CLEC1A	185.087	-1.65757	0.0877465	-18.8904	1.36845e-79	6.57253e-78
C14orf180	188.184	-5.13862	0.272034	-18.8897	1.38726e-79	6.65569e-78
BCL9	3855.63	1.23902	0.0656043	18.8863	1.47841e-79	7.08539e-78
CALCOCO1	4846.19	-1.06082	0.0561767	-18.8835	1.55769e-79	7.45727e-78
TSHZ2	1407.9	-2.38757	0.126532	-18.8693	2.0412e-79	9.76149e-78
GPRC5A	19633.5	2.3637	0.125273	18.8684	2.07579e-79	9.91627e-78
RP11-480I12.5	239.465	2.51006	0.133047	18.866	2.17013e-79	1.03558e-77
SSX2IP	1920.97	1.26299	0.0669718	18.8585	2.50306e-79	1.19317e-77
SLC16A3	2691.97	2.24677	0.119159	18.8552	2.66259e-79	1.26786e-77
MAP7D3	674.446	-1.89261	0.100432	-18.8447	3.24506e-79	1.54356e-77
EGR1	22097.4	-2.6682	0.141613	-18.8416	3.44619e-79	1.63748e-77
HIST1H2BK	1935.5	2.09682	0.111304	18.8386	3.64467e-79	1.72993e-77
HGH1	2779.57	1.49598	0.0794357	18.8326	4.08588e-79	1.93728e-77
AC009005.2	120.54	2.52379	0.134033	18.8296	4.31802e-79	2.04517e-77
FAM196B	91.5272	-3.82872	0.203352	-18.8281	4.44512e-79	2.10312e-77
TLCD2	777.437	-1.69056	0.0897912	-18.8276	4.484e-79	2.11926e-77
CACFD1	2933.04	1.4391	0.0764442	18.8256	4.66313e-79	2.20158e-77
CACNB3	2604.56	1.44577	0.0768128	18.822	4.98621e-79	2.35162e-77
MAFG-AS1	490.509	1.75416	0.0932129	18.8188	5.29321e-79	2.49376e-77
CDC25A	488.76	2.175	0.115606	18.8139	5.80516e-79	2.73205e-77
CELF2	2342.58	-1.929	0.102554	-18.8096	6.3057e-79	2.96448e-77
SLC29A4	654.784	-2.5214	0.134102	-18.8021	7.2608e-79	3.40989e-77
TMED3	10051.6	1.33589	0.0710518	18.8017	7.31768e-79	3.43297e-77
DIXDC1	2250.55	-1.44956	0.0771257	-18.7948	8.33383e-79	3.90556e-77
HLF	779.732	-2.85066	0.151706	-18.7907	8.99478e-79	4.21086e-77
MEOX2-AS1	29.7954	-3.79019	0.201715	-18.7898	9.15512e-79	4.28142e-77
FKBP4	23328.5	1.47886	0.0787277	18.7844	1.0128e-78	4.73142e-77
SCAMP3	6225.65	1.04109	0.0554554	18.7735	1.24327e-78	5.80195e-77
MASP1	85.6626	-3.58626	0.191029	-18.7734	1.24659e-78	5.81134e-77
LINC00377	2.45463	-4.06984	0.216793	-18.7729	1.25842e-78	5.86037e-77
STAB2	73.394	-2.91689	0.155384	-18.7722	1.27494e-78	5.93107e-77
SBDS	5054.37	-0.830089	0.0442267	-18.769	1.3548e-78	6.29601e-77
GPR68	746.264	1.75214	0.0933594	18.7677	1.387e-78	6.43891e-77
GALE	2261.51	1.62165	0.0864592	18.7562	1.72173e-78	7.98449e-77
PABPC1P4	102.848	-1.66039	0.0885281	-18.7555	1.74628e-78	8.08989e-77
GAL3ST2	56.6522	4.75232	0.253435	18.7516	1.87687e-78	8.68579e-77
CXCL2	294.571	-3.40236	0.181472	-18.7487	1.98448e-78	9.17424e-77
EPM2A	471.231	-1.1593	0.0618398	-18.7468	2.05535e-78	9.492e-77
HIST1H2BE	17.6445	3.42601	0.182793	18.7425	2.2277e-78	1.02773e-76
RP11-368I23.2	1.97347	-3.98657	0.212777	-18.7359	2.52385e-78	1.16315e-76
KIAA1524	671.005	1.87263	0.0999664	18.7325	2.68737e-78	1.23722e-76
BCAS4	1877.66	2.0288	0.108326	18.7286	2.89506e-78	1.33146e-76
FANCD2	1411.31	1.47517	0.0787924	18.7223	3.25935e-78	1.49745e-76
GSG2	167.732	2.02294	0.108077	18.7176	3.55684e-78	1.63244e-76
CXCL12	8894.36	-1.91425	0.102316	-18.7091	4.17054e-78	1.91212e-76
TMEM88	127.319	-1.98583	0.10617	-18.7043	4.56655e-78	2.09153e-76
TRPA1	291.264	4.66526	0.249429	18.7038	4.61057e-78	2.10951e-76
HNRNPA1P57	177.642	6.35834	0.339968	18.7027	4.70193e-78	2.1491e-76
ROGDI	2588.85	1.51736	0.0811502	18.6982	5.12321e-78	2.33925e-76
RP11-632K20.7	84.1784	-1.41967	0.0759284	-18.6974	5.19592e-78	2.37001e-76
RP11-96C23.13	12.7517	-2.30284	0.123208	-18.6907	5.89093e-78	2.68427e-76
TBL2	3443.5	0.884262	0.0473131	18.6896	6.02126e-78	2.74084e-76
RP11-542B15.1	12.823	3.36727	0.18022	18.6842	6.65171e-78	3.02472e-76
RNF187	11177.8	1.01161	0.0541571	18.6792	7.31051e-78	3.3209e-76
RHOJ	938.33	-1.56654	0.0839004	-18.6714	8.45476e-78	3.83677e-76
AHNAK	99394.4	-1.52683	0.081781	-18.6697	8.73038e-78	3.9578e-76
SNRNP25	2289.41	1.34009	0.071794	18.6657	9.40584e-78	4.25967e-76
NDRG2	6985.09	-2.19556	0.117637	-18.6639	9.7439e-78	4.40827e-76
PARPBP	427.377	1.58211	0.0847739	18.6628	9.94648e-78	4.49534e-76
RP11-2E11.5	13.4428	-2.37123	0.127078	-18.6597	1.054e-77	4.75875e-76
NR3C2	586.509	-2.17075	0.116344	-18.658	1.08626e-77	4.89943e-76
KIFC2	1349.07	2.10446	0.112832	18.6512	1.23497e-77	5.5645e-76
SOX7	360.235	-1.8754	0.100558	-18.65	1.26186e-77	5.67989e-76
MRGPRF-AS1	3.68869	-3.08157	0.165235	-18.6496	1.27309e-77	5.72465e-76
ACAN	386.782	3.20862	0.172064	18.6478	1.31518e-77	5.90793e-76
PCK1	653.007	-4.90948	0.263341	-18.6431	1.43689e-77	6.44814e-76
TSEN54	2304.02	1.26449	0.0678429	18.6385	1.56485e-77	7.01528e-76
CPM	2407.84	-2.07629	0.111461	-18.6279	1.90872e-77	8.54825e-76
CFL1	49906.7	1.02517	0.0550655	18.6173	2.32618e-77	1.04074e-75
HM13	11589.9	1.03408	0.0555581	18.6127	2.53715e-77	1.13398e-75
NDN	1009	-1.84955	0.0993878	-18.6094	2.69477e-77	1.20322e-75
CHTF18	1264.93	1.83195	0.0984481	18.6082	2.75591e-77	1.22929e-75
NUDT16L1	2229.08	1.33253	0.0716123	18.6076	2.78981e-77	1.24316e-75
RP1-63M2.7	32.9809	2.45131	0.131746	18.6063	2.85457e-77	1.27074e-75
WT1	307.298	4.76728	0.25624	18.6047	2.9409e-77	1.30786e-75
SLC37A1	2203.17	1.23971	0.0666456	18.6015	3.12647e-77	1.389e-75
HOXA4	69.1422	-2.28623	0.122908	-18.6012	3.14165e-77	1.39435e-75
LINC01070	4.43596	-4.94569	0.265903	-18.5996	3.23554e-77	1.43459e-75
AC114730.3	82.5148	4.1376	0.222461	18.5992	3.26051e-77	1.44421e-75
STX12	3729.9	-0.747149	0.0402153	-18.5787	4.77626e-77	2.11349e-75
RP4-616B8.5	11.8242	3.58593	0.193022	18.5778	4.86227e-77	2.14942e-75
WDFY3-AS2	168.225	-1.47366	0.0793881	-18.5627	6.43833e-77	2.8433e-75
HIST1H4I	929.752	2.03627	0.109699	18.5624	6.47895e-77	2.85839e-75
WDPCP	398.859	-1.08061	0.0582418	-18.5539	7.57908e-77	3.34043e-75
KY	37.8829	-3.33938	0.180117	-18.5401	9.80792e-77	4.3185e-75
LINC00337	22.6432	2.80178	0.15118	18.5327	1.12477e-76	4.94754e-75
CRIM1	8725.17	-1.68739	0.0910539	-18.5318	1.14418e-76	5.02796e-75
TRPM3	20.8934	-2.75632	0.148865	-18.5156	1.54624e-76	6.78801e-75
CLPSL2	86.7263	3.37791	0.182457	18.5134	1.60917e-76	7.05731e-75
TIGD3	59.9969	2.04817	0.110635	18.5128	1.62788e-76	7.13234e-75
DBNDD1	2575.61	1.90082	0.102707	18.5073	1.8024e-76	7.88917e-75
SNRPB	9996.38	1.26695	0.0684785	18.5014	2.0121e-76	8.79836e-75
ACTA2-AS1	246.834	-2.56765	0.138824	-18.4957	2.23483e-76	9.76272e-75
PRRG3	105.264	-2.95455	0.159759	-18.4937	2.3187e-76	1.01191e-74
C2orf48	35.3459	3.26634	0.176643	18.4912	2.42926e-76	1.05912e-74
UBAP2L	13811.1	0.818907	0.0442869	18.491	2.44151e-76	1.06342e-74
CBX7	1960.53	-1.52449	0.08247	-18.4854	2.70602e-76	1.17747e-74
RNPEP	7998.18	1.01166	0.0547447	18.4797	3.00953e-76	1.30826e-74
ZWILCH	1271.24	1.12735	0.0610213	18.4747	3.30159e-76	1.43382e-74
KIAA1211	381.625	2.66955	0.144498	18.4746	3.30643e-76	1.43452e-74
INMT	344.188	-2.51886	0.136433	-18.4622	4.15732e-76	1.80193e-74
CASP14	1065.55	6.41225	0.347364	18.4598	4.35287e-76	1.88485e-74
ELAVL1	5795.23	0.628172	0.0340301	18.4593	4.38897e-76	1.89863e-74
TRAF2	1811.87	1.19688	0.0648395	18.4592	4.3992e-76	1.9012e-74
KAT2B	1157.54	-1.43427	0.0777483	-18.4476	5.45223e-76	2.354e-74
MEOX2	416.689	-2.72661	0.147807	-18.447	5.50922e-76	2.37629e-74
TSSC1	1457.43	0.893081	0.0484206	18.4442	5.80209e-76	2.50019e-74
RP11-6N17.3	24.4713	-1.3897	0.0754023	-18.4305	7.48569e-76	3.22255e-74
WHAMMP2	97.2706	-1.63515	0.0887269	-18.429	7.68349e-76	3.3045e-74
C8orf88	50.0659	-2.08922	0.113409	-18.422	8.74933e-76	3.75925e-74
HSH2D	1199.85	2.67719	0.145373	18.4161	9.76631e-76	4.19215e-74
CDADC1	465.505	-0.793763	0.0431033	-18.4154	9.8937e-76	4.24274e-74
AP1M2	6311.79	1.57424	0.0855102	18.4099	1.09395e-75	4.68667e-74
AOC2	82.9466	-2.28469	0.124132	-18.4053	1.19216e-75	5.10251e-74
PDE1B	452.704	-1.78652	0.0970718	-18.4042	1.21653e-75	5.20183e-74
PVRL2	13367.5	1.3139	0.0714191	18.3971	1.38681e-75	5.9242e-74
TNFRSF9	196.039	2.70437	0.147011	18.3957	1.42236e-75	6.0644e-74
HAS3	621.158	-2.88725	0.156952	-18.3957	1.42147e-75	6.0644e-74
ZNF300P1	88.8185	-2.19094	0.119112	-18.394	1.46686e-75	6.24816e-74
C10orf128	494.264	-1.80107	0.0979237	-18.3926	1.50567e-75	6.40733e-74
SYNM	6036.99	-3.08888	0.16798	-18.3884	1.62797e-75	6.92114e-74
AQP7P2	6.59614	-5.46189	0.297056	-18.3867	1.6778e-75	7.12616e-74
HOXC11	523.669	3.58241	0.194848	18.3857	1.71049e-75	7.25805e-74
PGM5	644.283	-2.53457	0.137867	-18.3841	1.76028e-75	7.46222e-74
MIR100HG	13.2068	-2.60175	0.141599	-18.3741	2.11912e-75	8.97486e-74
KIT	3598.21	-2.97525	0.161985	-18.3675	2.39335e-75	1.01266e-73
ADHFE1	358.082	-1.98563	0.108108	-18.3671	2.41111e-75	1.0192e-73
ATP13A1	5264.76	0.902642	0.0491566	18.3626	2.61824e-75	1.10571e-73
COA6	1349.06	1.27055	0.0692126	18.3572	2.88892e-75	1.21886e-73
LAMTOR2	3577.53	1.37652	0.0750075	18.3517	3.19689e-75	1.34624e-73
ZNF367	633.096	1.67749	0.0914077	18.3518	3.19567e-75	1.34624e-73
JADE1	2371.29	-1.08675	0.0592284	-18.3485	3.3944e-75	1.42806e-73
LMNB2	4333.3	1.39427	0.0759917	18.3477	3.44317e-75	1.44721e-73
HNRNPA1P66	2.40126	-3.4876	0.190096	-18.3465	3.52335e-75	1.47951e-73
DAP3	9241.78	0.887807	0.0483983	18.3437	3.70397e-75	1.55388e-73
GPR133	294.108	-2.55173	0.139124	-18.3413	3.8725e-75	1.62305e-73
GTF3C1	9124.94	0.926113	0.0504987	18.3393	4.01675e-75	1.68192e-73
RGL1	1723.49	-1.51251	0.0824877	-18.3362	4.25401e-75	1.77959e-73
RP11-429J17.7	98.245	2.0924	0.114233	18.317	6.05524e-75	2.53073e-73
ADAM33	435.991	-2.69987	0.147433	-18.3126	6.57056e-75	2.74352e-73
PHKG2	2177.76	1.15578	0.0631197	18.3109	6.77677e-75	2.82696e-73
TMEM170B	643.373	-1.61232	0.088064	-18.3085	7.08114e-75	2.95116e-73
LGALS8-AS1	35.6861	2.42773	0.132624	18.3054	7.50066e-75	3.12307e-73
ADCY4	751.13	-1.76568	0.0964695	-18.303	7.83447e-75	3.25901e-73
AASS	402.407	-1.81662	0.099268	-18.3002	8.24601e-75	3.42699e-73
C1orf112	785.829	1.32268	0.0723161	18.2903	9.89104e-75	4.10682e-73
C3orf67	275.48	2.09413	0.1145	18.2894	1.00559e-74	4.17135e-73
RP11-138H8.6	3.16389	-2.80705	0.153496	-18.2875	1.04163e-74	4.31685e-73
SNCA	172.064	-1.77638	0.0971548	-18.284	1.11003e-74	4.59602e-73
RP11-196G18.22	1041.44	1.87745	0.102702	18.2805	1.18303e-74	4.89371e-73
RP11-122M14.1	24.5692	2.93627	0.160693	18.2725	1.37002e-74	5.66194e-73
REEP4	1669.4	1.40318	0.0768028	18.27	1.4352e-74	5.92579e-73
RHBDL1	260.051	2.62002	0.143423	18.2677	1.49519e-74	6.16777e-73
CLCN2	596.166	1.33483	0.0730929	18.2621	1.65845e-74	6.83446e-73
RNU5B-3P	1.07218	-3.87931	0.212425	-18.262	1.65989e-74	6.83446e-73
C6orf3	62	-1.62035	0.0887317	-18.2612	1.6844e-74	6.92898e-73
MRPS34	4299.71	1.39776	0.0765463	18.2603	1.71282e-74	7.03937e-73
DONSON	1032.2	1.38987	0.076115	18.2601	1.72106e-74	7.06667e-73
CHL1	841.66	-2.98768	0.163743	-18.2461	2.22024e-74	9.10791e-73
RP13-270P17.2	53.3199	-1.39574	0.0765137	-18.2416	2.4109e-74	9.8809e-73
ADCYAP1R1	208.47	-2.6445	0.14498	-18.2405	2.46142e-74	1.00787e-72
TMEM252	9.22751	-3.21493	0.176336	-18.2319	2.88124e-74	1.17868e-72
LINC01366	4.84415	-2.14127	0.117463	-18.2294	3.01855e-74	1.23372e-72
CNTNAP2	2234.43	3.97043	0.217811	18.2288	3.04889e-74	1.24497e-72
KCNAB1	331.765	-1.83744	0.100805	-18.2276	3.11702e-74	1.27162e-72
ANGPTL2	5250.44	-1.84687	0.101354	-18.222	3.45053e-74	1.40639e-72
FAM96A	2214.73	0.868184	0.0476522	18.2192	3.63611e-74	1.48067e-72
SRP9	13518.6	0.971802	0.0533416	18.2185	3.68334e-74	1.49853e-72
RP11-138I17.1	11.3293	-4.18702	0.229846	-18.2167	3.80713e-74	1.54748e-72
EPN3	2762.7	2.20619	0.12111	18.2164	3.82774e-74	1.55443e-72
C9orf116	522.918	2.03316	0.111619	18.2152	3.91261e-74	1.58745e-72
TARS2	3115.91	1.04786	0.057529	18.2145	3.9609e-74	1.60557e-72
CD302	616.003	-1.68683	0.0926387	-18.2087	4.40195e-74	1.78273e-72
HIST3H2BB	158.06	3.11557	0.171128	18.2061	4.61804e-74	1.86854e-72
KLF10	5185.22	-1.23785	0.0679974	-18.2044	4.76607e-74	1.92668e-72
S100A14	12418.7	2.67563	0.146997	18.2019	4.98298e-74	2.01253e-72
ATP1A3	240.283	3.54317	0.194671	18.2008	5.08664e-74	2.05253e-72
STMN1	12262.1	1.78673	0.098197	18.1954	5.61514e-74	2.26374e-72
ZNF781	72.4473	-1.53298	0.0842547	-18.1946	5.6994e-74	2.29562e-72
MTL5	2123.09	2.00534	0.110218	18.1944	5.71656e-74	2.30045e-72
SAMD1	3082.42	1.15048	0.0632596	18.1866	6.59203e-74	2.65036e-72
RP11-464C19.3	5.54867	-3.8765	0.213219	-18.1809	7.31769e-74	2.93945e-72
HOXC13	658.321	2.97639	0.163809	18.1698	8.94733e-74	3.59081e-72
SPATS2	2286.02	0.854198	0.0470243	18.165	9.76714e-74	3.91629e-72
CBX8	722.548	1.49478	0.0822962	18.1634	1.00633e-73	4.03142e-72
SAMD4A	1142.23	-1.68917	0.0930061	-18.1619	1.0337e-73	4.13731e-72
MSRB3	2895.27	-1.79414	0.0988004	-18.1593	1.08493e-73	4.33845e-72
LEPROT	6907.03	-0.867669	0.0477817	-18.159	1.08967e-73	4.35347e-72
ZNF48	1209.33	1.06456	0.0586273	18.1582	1.1065e-73	4.41676e-72
MEF2C-AS1	21.1824	-2.24988	0.123919	-18.156	1.1518e-73	4.59344e-72
PARK2	195.328	-1.88268	0.103702	-18.1547	1.17919e-73	4.69846e-72
LRWD1	1156.54	1.14969	0.063328	18.1546	1.18123e-73	4.70236e-72
CENPO	804.891	1.27403	0.070178	18.1542	1.18951e-73	4.73108e-72
STXBP2	3250.94	1.4594	0.0803896	18.1541	1.19083e-73	4.73209e-72
AP000892.6	369.812	-2.14598	0.118238	-18.1496	1.29292e-73	5.13321e-72
NAT14	1229.76	1.74227	0.0960108	18.1466	1.36718e-73	5.42318e-72
CREB3L1	4433.26	2.30749	0.127168	18.1452	1.40052e-73	5.55046e-72
PDGFD	1720.73	-1.85208	0.102081	-18.1432	1.4523e-73	5.75055e-72
RELT	487.787	1.51863	0.0837035	18.143	1.45889e-73	5.77153e-72
PDIA4	15074.3	1.18336	0.0652274	18.1421	1.48389e-73	5.8652e-72
RP1-193H18.3	29.6121	-5.08657	0.280389	-18.1411	1.51019e-73	5.96384e-72
TWIST2	328.452	-2.27796	0.125574	-18.1404	1.52979e-73	6.03588e-72
NOVA2	305.501	-1.48355	0.0817848	-18.1397	1.54972e-73	6.10909e-72
PIF1	188.243	2.34601	0.129333	18.1393	1.55923e-73	6.14113e-72
CKAP2	2187.21	1.38563	0.0764289	18.1297	1.85751e-73	7.30946e-72
TMBIM1	8919.16	-1.12702	0.0621676	-18.1288	1.88948e-73	7.42867e-72
ABLIM1	8398.45	-1.44446	0.0796819	-18.1278	1.92223e-73	7.55075e-72
AK3	3644.1	-0.999521	0.0551755	-18.1153	2.41341e-73	9.47177e-72
DMRT2	72.2167	-2.8131	0.155291	-18.115	2.42466e-73	9.50755e-72
MATN2	2926.72	-2.5273	0.139601	-18.1037	2.9791e-73	1.16713e-71
ARRDC3	6052.1	-1.40897	0.0778407	-18.1006	3.14997e-73	1.23298e-71
NR2F6	3946.79	1.25887	0.069568	18.0955	3.45798e-73	1.35235e-71
ZFP36	12164.1	-2.20278	0.121732	-18.0954	3.46719e-73	1.35477e-71
CLDN5	942.052	-2.56184	0.141578	-18.0949	3.49388e-73	1.36399e-71
IFI6	21685.3	2.89001	0.159723	18.0939	3.55956e-73	1.38841e-71
TRAIP	382.985	1.30078	0.0718923	18.0934	3.59276e-73	1.40014e-71
ADIPOQ-AS1	8.26829	-5.29468	0.292741	-18.0866	4.0654e-73	1.58294e-71
RP11-61I13.3	64.6877	-2.32197	0.128449	-18.077	4.83431e-73	1.88068e-71
PPAPDC3	159.295	-1.89646	0.10494	-18.072	5.29912e-73	2.0597e-71
RPL26L1	1090.43	1.00538	0.0556384	18.0698	5.5097e-73	2.13968e-71
PTPRM	3152.72	-1.54551	0.085547	-18.0662	5.87883e-73	2.28104e-71
ABCB5	57.3998	-3.58851	0.198745	-18.0559	7.09342e-73	2.74751e-71
PFKFB4	754.058	1.30539	0.072297	18.0559	7.0877e-73	2.74751e-71
NUP62	5124.85	0.770403	0.0426764	18.0522	7.57865e-73	2.9329e-71
ALG1	1540.25	0.956667	0.0530287	18.0406	9.35802e-73	3.61835e-71
AKR1C1	1108.55	-3.47268	0.192498	-18.0401	9.44342e-73	3.6482e-71
RP5-875H18.4	2.44282	-3.01837	0.167334	-18.038	9.80383e-73	3.78414e-71
CNTD2	463.154	3.03011	0.167997	18.0367	1.00308e-72	3.86837e-71
SNRPE	4209.7	1.15552	0.0640818	18.032	1.09218e-72	4.20835e-71
PCAT19	315.91	-1.68528	0.0935073	-18.0229	1.28747e-72	4.95653e-71
HIST2H4A	32.7363	2.89671	0.160731	18.0221	1.30752e-72	5.02937e-71
HIST1H3J	11.8537	4.26246	0.236537	18.0203	1.35032e-72	5.18949e-71
TSACC	46.9196	1.82777	0.101452	18.0161	1.45684e-72	5.59404e-71
FADS3	1303.75	-1.55206	0.086152	-18.0153	1.47746e-72	5.66832e-71
FBXO31	1963.09	-0.871698	0.0484057	-18.0082	1.68036e-72	6.44117e-71
RP11-561I11.3	12.0912	-4.60593	0.255884	-18.0001	1.94531e-72	7.45036e-71
HMP19	78.3113	4.95829	0.275554	17.9939	2.17541e-72	8.32446e-71
PLA2R1	1352.21	-1.51639	0.0842729	-17.9938	2.17799e-72	8.32714e-71
AKAP6	305.483	-2.21964	0.123386	-17.9895	2.35617e-72	9.00064e-71
GPRASP2	738.375	-1.31752	0.073248	-17.9872	2.45554e-72	9.37217e-71
PARVA	6670.49	-0.988315	0.0549587	-17.9829	2.65417e-72	1.01216e-70
PDE1C	383.76	-2.76164	0.153614	-17.9778	2.9058e-72	1.10717e-70
MEDAG	702.102	-2.3773	0.132251	-17.9756	3.02351e-72	1.15103e-70
SSPN	2151.81	-1.6537	0.0920077	-17.9735	3.14464e-72	1.19612e-70
UTRN	7703.25	-1.4843	0.0825909	-17.9718	3.24317e-72	1.23254e-70
RAMP1	1106.94	3.08713	0.171843	17.9648	3.67403e-72	1.39509e-70
FANCA	694.162	1.9154	0.106633	17.9626	3.82721e-72	1.45202e-70
NANS	4315.34	1.19115	0.0663267	17.9589	4.09068e-72	1.55065e-70
SCN9A	86.9067	-2.30707	0.128469	-17.9582	4.14021e-72	1.56809e-70
HIST1H1PS1	63.406	3.29346	0.183404	17.9574	4.19805e-72	1.58864e-70
ATIC	6825.51	0.867102	0.0482879	17.9569	4.23752e-72	1.60221e-70
CELSR3	910.799	2.49584	0.138993	17.9566	4.25772e-72	1.60848e-70
CDCA4	1205.15	1.26751	0.0706025	17.9527	4.57114e-72	1.72542e-70
TMOD1	224.062	-2.79793	0.155889	-17.9482	4.95944e-72	1.8704e-70
RIBC2	218.209	1.82418	0.101641	17.9474	5.03096e-72	1.89576e-70
PAK4	5854.77	1.25984	0.070211	17.9436	5.38674e-72	2.02811e-70
NEURL1	836.452	3.49078	0.19457	17.941	5.6423e-72	2.12253e-70
FAM72B	72.3775	2.34288	0.130598	17.9396	5.7852e-72	2.17444e-70
TOR2A	1036.64	1.17979	0.0657723	17.9375	6.00936e-72	2.25679e-70
CD209	347.725	-2.61796	0.145959	-17.9362	6.14709e-72	2.30656e-70
LMO7DN	2.97919	-3.1235	0.174194	-17.9312	6.7343e-72	2.52477e-70
FBN2	751.467	3.07175	0.171349	17.9268	7.28004e-72	2.72707e-70
HSD52	3.97995	-4.47483	0.249619	-17.9266	7.30628e-72	2.73459e-70
NPR2	629.445	-1.58875	0.088638	-17.9241	7.65397e-72	2.86231e-70
ARHGAP19	1189.14	-0.965176	0.0538487	-17.9239	7.6805e-72	2.86982e-70
MANF	3815.27	1.12614	0.0628373	17.9215	8.01564e-72	2.99253e-70
KCNMB1	623.18	-2.40775	0.134387	-17.9165	8.76209e-72	3.26846e-70
METRN	3226.92	2.39011	0.133505	17.9028	1.12043e-71	4.17595e-70
N4BP3	2174.82	1.83887	0.102715	17.9026	1.12466e-71	4.18821e-70
MOB3C	1187.48	-0.864014	0.048274	-17.8981	1.21958e-71	4.53788e-70
TRDN	72.1942	-4.44399	0.248295	-17.898	1.22211e-71	4.54349e-70
PCNX	3760.69	-1.08422	0.0605797	-17.8974	1.23494e-71	4.58734e-70
KLF11	1658.35	-1.23861	0.0692259	-17.8922	1.35526e-71	5.03009e-70
C19orf12	1761.17	-1.27505	0.0712658	-17.8914	1.37602e-71	5.10289e-70
SGOL2	793.429	1.40284	0.0784149	17.8899	1.41327e-71	5.23663e-70
LINC00989	12.9748	-2.15841	0.120674	-17.8862	1.51004e-71	5.59056e-70
POLR2H	3052.34	1.06922	0.0597814	17.8856	1.52834e-71	5.65357e-70
FOXJ1	385.402	4.49726	0.251593	17.8751	1.84217e-71	6.80884e-70
CCR8	43.9528	3.22101	0.180242	17.8705	2.00355e-71	7.39914e-70
KCNJ2-AS1	34.3461	-2.12956	0.119188	-17.8672	2.12355e-71	7.83579e-70
AP000251.3	40.9484	2.59248	0.145117	17.8648	2.21727e-71	8.17481e-70
TLN1	24157.2	-0.889264	0.049784	-17.8624	2.31277e-71	8.51984e-70
CHPF	8217.26	1.44355	0.0808224	17.8607	2.38431e-71	8.77611e-70
HCAR3	26.7588	-2.21061	0.123786	-17.8583	2.49103e-71	9.16135e-70
GRAMD3	1771.07	-1.45231	0.0813251	-17.8581	2.50068e-71	9.18924e-70
RP11-255G12.2	3.06468	-2.82742	0.158328	-17.858	2.5051e-71	9.19787e-70
ASB1	1364.78	-0.93167	0.0521825	-17.8541	2.6881e-71	9.86163e-70
CTD-2135J3.3	9.79286	-1.67593	0.0938763	-17.8525	2.76362e-71	1.01303e-69
RMI1	1214.6	1.18672	0.0664752	17.852	2.78888e-71	1.02145e-69
RGCC	1384.61	-1.53715	0.0861596	-17.8408	3.41e-71	1.24791e-69
HSPB2-C11orf52	1.21462	-3.15575	0.176923	-17.8368	3.65938e-71	1.33807e-69
CTD-2078B5.2	9.30268	-2.5154	0.141027	-17.8362	3.69929e-71	1.35155e-69
CDC7	744.164	1.75984	0.0986672	17.8361	3.70685e-71	1.3532e-69
MGRN1	5673.5	0.859434	0.0481956	17.8322	3.97534e-71	1.45002e-69
DRP2	66.4846	2.11325	0.118563	17.8238	4.61504e-71	1.68197e-69
SMIM22	2979.94	2.52793	0.14184	17.8223	4.7421e-71	1.72686e-69
NKX3-2	66.939	2.94722	0.165411	17.8175	5.16676e-71	1.87997e-69
CSTF2	1196.53	0.852359	0.0478588	17.8099	5.92448e-71	2.1539e-69
PER2	2504.81	-1.21731	0.0683584	-17.8078	6.14828e-71	2.23344e-69
IGF1	243.601	-2.50503	0.140683	-17.8062	6.32672e-71	2.29638e-69
SMARCA4	10456.5	0.952527	0.0535152	17.7992	7.16946e-71	2.60014e-69
P2RY12	110.686	-2.54188	0.142823	-17.7975	7.38917e-71	2.67764e-69
A2M-AS1	83.0232	-1.37764	0.0774312	-17.7918	8.18493e-71	2.96359e-69
PKD1L2	8.24716	-1.47658	0.0829928	-17.7917	8.20262e-71	2.96757e-69
ADAMTS1	4292.21	-2.23117	0.125421	-17.7894	8.53895e-71	3.08674e-69
CD3EAP	473.583	1.12045	0.0629866	17.7887	8.64351e-71	3.12199e-69
PRG4	732.194	-3.54661	0.199424	-17.7843	9.36012e-71	3.37808e-69
RUVBL1	3634.7	1.0322	0.0580501	17.7812	9.89203e-71	3.56715e-69
AC112721.2	17.8764	3.42846	0.192855	17.7774	1.05816e-70	3.81271e-69
MICAL2	6000.39	1.49903	0.0843515	17.7712	1.18159e-70	4.254e-69
CD80	76.776	2.22148	0.125034	17.767	1.27389e-70	4.5826e-69
RP11-265N7.1	34.1872	3.58046	0.201531	17.7663	1.28943e-70	4.63473e-69
SLC9A9	481.791	-1.60477	0.090331	-17.7654	1.30906e-70	4.70152e-69
LINC00466	12.3945	4.27323	0.240562	17.7635	1.35465e-70	4.86132e-69
APH1A	17612.8	0.881882	0.0496471	17.763	1.36731e-70	4.90278e-69
CCNE1	508.66	2.80587	0.157979	17.761	1.41786e-70	5.07995e-69
CTD-2263F21.1	10.2933	-2.48074	0.139718	-17.7554	1.56684e-70	5.60918e-69
KLF6	12759.5	-1.33396	0.0751336	-17.7545	1.59149e-70	5.69285e-69
AC135178.7	3.3825	-2.90588	0.163712	-17.7499	1.72612e-70	6.16947e-69
COL1A1	397162	2.25933	0.127317	17.7457	1.86028e-70	6.64361e-69
SF3B4	7146.6	0.994572	0.0560474	17.7452	1.87695e-70	6.69777e-69
ITM2A	1736.1	-2.23245	0.125846	-17.7396	2.07384e-70	7.39443e-69
TMEM100	273.864	-3.24954	0.183185	-17.7391	2.09105e-70	7.44982e-69
STAT5A	3684.56	-1.43718	0.0810235	-17.7378	2.14147e-70	7.62334e-69
CYSRT1	136.405	2.28802	0.12906	17.7283	2.5363e-70	9.02163e-69
MIR143HG	348.046	-3.12944	0.176538	-17.7267	2.61087e-70	9.27946e-69
B3GALT1	40.2873	-3.14832	0.177622	-17.7248	2.69749e-70	9.57966e-69
IL11RA	606.357	-1.47182	0.0830428	-17.7236	2.75582e-70	9.77897e-69
SLCO1C1	27.1659	-2.04662	0.115521	-17.7164	3.13307e-70	1.11088e-68
EVPL	3146.98	1.67991	0.0948494	17.7113	3.43061e-70	1.2154e-68
ZNF687	3828.05	0.93307	0.0526879	17.7094	3.54846e-70	1.25615e-68
CREB5	534.812	-2.06176	0.116464	-17.703	3.97731e-70	1.40685e-68
MS4A15	222.624	4.64073	0.262315	17.6914	4.88125e-70	1.72521e-68
MAGOH2P	16.4099	-1.81557	0.102651	-17.6869	5.29295e-70	1.86923e-68
LINC00052	154.672	7.393	0.418127	17.6812	5.85013e-70	2.06437e-68
MYOM2	139.151	-2.5419	0.143784	-17.6786	6.13106e-70	2.16178e-68
FAM110A	2054.37	1.50013	0.0848703	17.6755	6.47428e-70	2.28003e-68
TANK	2833.5	-0.96211	0.0544318	-17.6755	6.47669e-70	2.28003e-68
SPDYC	165.268	6.23461	0.35274	17.6748	6.55648e-70	2.30629e-68
PPP1CA	10275.2	1.13403	0.0641658	17.6735	6.70874e-70	2.35799e-68
LINC00933	47.2671	-1.57979	0.0894	-17.6711	7.00645e-70	2.46068e-68
TLX1	117.205	5.91915	0.334965	17.6709	7.02176e-70	2.4641e-68
TMEM9	8672.49	1.13131	0.0640241	17.67	7.13552e-70	2.50205e-68
QKI	5664.53	-1.27029	0.0719349	-17.6589	8.69849e-70	3.04769e-68
MYLK2	24.218	2.5183	0.142624	17.657	8.99385e-70	3.1487e-68
CYYR1	1448.13	-1.81263	0.102669	-17.655	9.32009e-70	3.26034e-68
RYR3	168.279	-2.33142	0.132073	-17.6525	9.73958e-70	3.40441e-68
RSPO3	331.075	-2.43744	0.138166	-17.6414	1.18491e-69	4.13852e-68
SLC25A39	8934.67	1.17008	0.066327	17.6411	1.19216e-69	4.16058e-68
LINC00176	138.385	2.39023	0.135536	17.6354	1.31689e-69	4.59226e-68
CDH13	1314.89	-1.45369	0.0824435	-17.6326	1.38465e-69	4.82476e-68
FOSB	7049.03	-3.39591	0.192612	-17.6308	1.42962e-69	4.97757e-68
SLC22A3	175.764	-2.84683	0.161551	-17.6219	1.67325e-69	5.82126e-68
MMP10	300.605	3.82177	0.216886	17.6211	1.69677e-69	5.89848e-68
ISM1	854.861	-2.18591	0.124072	-17.618	1.79264e-69	6.22688e-68
HNRNPA2B1	45041.9	0.585747	0.0332509	17.616	1.85778e-69	6.44808e-68
RP5-875H18.10	3.17882	-2.92584	0.166093	-17.6157	1.86524e-69	6.46892e-68
SPRY1	2872.44	-1.79622	0.102012	-17.6078	2.14521e-69	7.43412e-68
BCL2L2	3013.73	-0.900593	0.0511506	-17.6067	2.18849e-69	7.57819e-68
SMYD1	250.673	-4.96081	0.281786	-17.6049	2.25916e-69	7.81681e-68
SMYD4	818.542	-0.746233	0.0423934	-17.6026	2.35446e-69	8.14019e-68
SPINT2	31903.9	1.40584	0.0798949	17.5961	2.63978e-69	9.11956e-68
HNRNPL	12533.5	0.498163	0.0283149	17.5937	2.75364e-69	9.50553e-68
RP11-124N14.3	11.4367	-1.95905	0.111376	-17.5896	2.96049e-69	1.02116e-67
PRRT3	1024.15	1.95786	0.111325	17.5868	3.10986e-69	1.07185e-67
PGP	1261.28	1.30014	0.0739285	17.5864	3.13118e-69	1.07836e-67
RXRG	37.3305	-3.03484	0.172654	-17.5776	3.65605e-69	1.25815e-67
RHOXF1	11.2962	-2.57999	0.146817	-17.5728	3.97846e-69	1.36804e-67
AC034236.2	0.963686	-4.42134	0.251635	-17.5704	4.14899e-69	1.42558e-67
HNRNPU	33842.9	0.549778	0.0312935	17.5685	4.29669e-69	1.47518e-67
LINC00924	34.7139	-2.34916	0.133745	-17.5644	4.61613e-69	1.58363e-67
IGFL3	28.9733	4.93009	0.28074	17.561	4.89842e-69	1.67918e-67
CSRNP3	254.102	-2.37342	0.135154	-17.5609	4.90815e-69	1.68122e-67
JAKMIP1	110.407	2.79351	0.159186	17.5487	6.08542e-69	2.08287e-67
TNFSF4	449.302	1.8437	0.105082	17.5454	6.45127e-69	2.20639e-67
UTS2B	13.3241	-2.2636	0.12903	-17.5433	6.69486e-69	2.28794e-67
HSD17B7	861.526	1.27336	0.0726012	17.5391	7.20352e-69	2.45988e-67
IER5L	1075.23	1.74788	0.0996678	17.537	7.47168e-69	2.5495e-67
N4BP2L1	908.374	-1.30484	0.0744543	-17.5254	9.16373e-69	3.12446e-67
LRP1	28444.4	-1.68666	0.0962453	-17.5246	9.29475e-69	3.1667e-67
CASP12	11.9439	-2.19082	0.125147	-17.506	1.28914e-68	4.3887e-67
PASK	1076.77	1.12704	0.0643851	17.5048	1.31793e-68	4.48328e-67
FAM49A	944.021	-1.58932	0.0908086	-17.5019	1.38587e-68	4.71079e-67
EMX2OS	173.952	-2.33422	0.13339	-17.4992	1.45378e-68	4.93784e-67
ILDR2	105.495	2.2635	0.129364	17.4971	1.50825e-68	5.11895e-67
SMIM3	1486.95	-1.43584	0.0821487	-17.4786	2.08576e-68	7.07361e-67
DPYSL2	5993.26	-1.36422	0.0780781	-17.4726	2.31798e-68	7.85515e-67
CAPN11	117.855	-2.34172	0.13403	-17.4716	2.35923e-68	7.98883e-67
LINC01197	61.3105	-1.95526	0.111925	-17.4694	2.45147e-68	8.29487e-67
USP44	39.238	-2.2834	0.130724	-17.4673	2.54425e-68	8.60223e-67
RP11-57A19.2	82.8293	2.54268	0.145572	17.4668	2.56437e-68	8.66366e-67
CFLAR	6118.83	-0.988043	0.0566062	-17.4547	3.17056e-68	1.07035e-66
WT1-AS	59.6029	4.8099	0.275573	17.4542	3.19905e-68	1.07915e-66
STX6	4359.42	0.840203	0.0481405	17.4531	3.25914e-68	1.09834e-66
TMCO1	9569.21	0.9019	0.0516756	17.4531	3.26088e-68	1.09834e-66
SLC7A5	7449.03	2.6062	0.149403	17.4441	3.81643e-68	1.28449e-66
ZEB2	2718.85	-1.5721	0.0901252	-17.4436	3.85291e-68	1.29579e-66
CFD	3274.06	-3.07354	0.176202	-17.4433	3.87344e-68	1.30171e-66
AC022007.5	343.604	-1.46807	0.0841696	-17.4418	3.9736e-68	1.33436e-66
PLAUR	2243.38	1.70994	0.0980644	17.4369	4.33062e-68	1.45314e-66
SRMS	320.319	2.36185	0.135475	17.4338	4.56786e-68	1.5316e-66
CSRP1	20655.6	-1.28307	0.0735981	-17.4335	4.5959e-68	1.53983e-66
P2RY14	139.445	-1.81711	0.104236	-17.4327	4.65554e-68	1.55864e-66
RP11-399C16.3	28.9672	2.67767	0.153609	17.4317	4.74497e-68	1.58739e-66
PLXNA3	4193.19	1.13951	0.0653721	17.4311	4.7942e-68	1.60265e-66
XXbac-BPGBPG55C20.2	82.6359	-1.47464	0.0846496	-17.4205	5.77084e-68	1.92768e-66
CTA-384D8.35	120.759	3.0532	0.17527	17.42	5.81806e-68	1.94199e-66
WHAMML1	119.342	-1.44852	0.083161	-17.4182	5.99938e-68	2.00101e-66
TICRR	573.955	2.07238	0.11902	17.412	6.69512e-68	2.23139e-66
AGAP1-IT1	36.2116	2.65832	0.152709	17.4078	7.19839e-68	2.39732e-66
RBP7	895.516	-2.21101	0.127037	-17.4044	7.63839e-68	2.54195e-66
SEL1L2	8.50459	-3.68845	0.211978	-17.4002	8.22569e-68	2.73535e-66
SAV1	3010.21	-0.961403	0.055276	-17.3928	9.36022e-68	3.1103e-66
CTB-43E15.2	1.08757	-3.6965	0.212544	-17.3917	9.54313e-68	3.1687e-66
KANK2	4800.13	-1.15916	0.0666588	-17.3894	9.92258e-68	3.29224e-66
KLHL4	61.6976	-2.05407	0.118134	-17.3877	1.0233e-67	3.39269e-66
WDR76	875.976	1.3147	0.0756327	17.3827	1.11587e-67	3.69686e-66
LAMA4	7270.88	-1.52137	0.0875527	-17.3766	1.24136e-67	4.10952e-66
RFC2	2222.97	1.04491	0.0601359	17.3759	1.25645e-67	4.1564e-66
DAAM2	1271.21	-1.78422	0.102696	-17.3739	1.3014e-67	4.30188e-66
ODF3L1	24.1749	-2.27571	0.130994	-17.3726	1.33089e-67	4.3961e-66
POU6F1	573.948	-1.13335	0.0652386	-17.3723	1.33665e-67	4.41183e-66
DPM2	3338.89	1.0403	0.0599075	17.3652	1.51451e-67	4.99519e-66
GIMAP6	1468.14	-1.56695	0.0902373	-17.3648	1.52454e-67	5.02082e-66
TBC1D10B	4656.35	0.768112	0.0442338	17.3648	1.52357e-67	5.02082e-66
RP11-7F17.3	22.3251	-2.14183	0.123362	-17.3622	1.5947e-67	5.24799e-66
PGM5-AS1	2.28998	-3.02651	0.174405	-17.3534	1.86062e-67	6.11855e-66
LEF1	1555.51	2.02733	0.11689	17.344	2.18957e-67	7.19498e-66
GPR34	559.643	-1.78965	0.10319	-17.3433	2.21622e-67	7.27717e-66
SPARCL1	19041.6	-1.71695	0.0990067	-17.3417	2.27743e-67	7.47263e-66
AGPAT2	4044.51	-1.72025	0.099201	-17.341	2.30583e-67	7.56023e-66
COPG1	16984.7	0.86796	0.0500994	17.3247	3.06068e-67	1.00278e-65
BAX	2458.8	1.16853	0.0674592	17.322	3.2086e-67	1.05047e-65
RP1-34B20.4	83.8644	3.398	0.19618	17.3208	3.2788e-67	1.07266e-65
C10orf54	2131.79	-1.57789	0.0911103	-17.3185	3.4132e-67	1.11581e-65
CUTC	757.938	-0.834458	0.048187	-17.3171	3.49771e-67	1.14259e-65
KCTD13	1325.67	1.10547	0.0638521	17.313	3.75206e-67	1.22478e-65
SHANK3	1742.56	-1.34755	0.0778463	-17.3103	3.93229e-67	1.28267e-65
KLK4	188.678	3.09775	0.178984	17.3075	4.13251e-67	1.34699e-65
HPD	56.4972	-2.90044	0.167605	-17.3052	4.29637e-67	1.39938e-65
GGCT	4786.01	1.40045	0.080939	17.3025	4.50254e-67	1.46545e-65
GPR19	101.011	2.34204	0.135386	17.299	4.78956e-67	1.55773e-65
RAD54B	271.571	1.5275	0.0883015	17.2987	4.8143e-67	1.56463e-65
RP11-31F15.2	25.0112	-1.90534	0.11015	-17.2976	4.90265e-67	1.59218e-65
RAB25	6913.11	1.49757	0.0865908	17.2948	5.14377e-67	1.66926e-65
DNASE1L2	88.1287	2.31125	0.133652	17.293	5.31367e-67	1.72314e-65
DNASE1L3	114.265	-2.73951	0.15849	-17.285	6.10317e-67	1.97772e-65
SUCLA2	2217.49	-0.925704	0.0535619	-17.2829	6.33016e-67	2.04978e-65
RP11-756G20.1	12.2853	-1.87563	0.108566	-17.2764	7.0841e-67	2.29224e-65
PSENEN	3615.68	1.14878	0.0665137	17.2714	7.72621e-67	2.4982e-65
HNRNPF	18357.7	0.730213	0.0422839	17.2693	8.01533e-67	2.5898e-65
FGF2	945.873	-2.73622	0.158568	-17.2558	1.01252e-66	3.26914e-65
PCDH18	1730.24	-1.8632	0.108	-17.2518	1.08536e-66	3.50176e-65
HIST1H2BC	440.98	2.59164	0.15023	17.2511	1.09737e-66	3.53794e-65
HOXB13	313.644	6.07131	0.35195	17.2505	1.10905e-66	3.57279e-65
RP4-755D9.1	115.536	-3.18713	0.184756	-17.2505	1.10979e-66	3.57279e-65
MLYCD	750.799	-0.987645	0.0572592	-17.2487	1.14528e-66	3.68438e-65
CBX2	1471.08	2.68948	0.15594	17.2469	1.18102e-66	3.7966e-65
PDE11A	198.545	-2.48125	0.143874	-17.246	1.19876e-66	3.85085e-65
TYMP	5983.76	1.82898	0.106146	17.2308	1.56045e-66	5.00912e-65
SYNGR4	16.8816	3.06619	0.177975	17.2282	1.63019e-66	5.22921e-65
RP11-693N9.2	146.877	-1.67465	0.0972272	-17.2241	1.75216e-66	5.6164e-65
ZCCHC24	2761.15	-1.55286	0.0902207	-17.2118	2.16481e-66	6.93411e-65
C1orf131	950.678	0.876041	0.0509144	17.2061	2.38796e-66	7.64337e-65
MRPL14	2803.09	1.31117	0.0762122	17.2042	2.46962e-66	7.89905e-65
PARN	4945.77	0.728451	0.0423451	17.2027	2.53328e-66	8.09683e-65
RP11-173M11.2	15.4421	-1.89666	0.110264	-17.2011	2.60694e-66	8.32627e-65
FBXW7	1420.03	-0.91794	0.0533699	-17.1996	2.67488e-66	8.53714e-65
ATP2A1-AS1	46.7621	2.19552	0.127655	17.1988	2.71e-66	8.64301e-65
NPW	77.18	3.87251	0.225248	17.1922	3.03657e-66	9.6776e-65
RP11-554A11.4	19.9848	-2.24928	0.130856	-17.189	3.21144e-66	1.02276e-64
CACNA2D1	936.053	-1.95732	0.113926	-17.1805	3.71493e-66	1.18226e-64
RP11-2E11.9	36.0747	-1.77237	0.103167	-17.1796	3.77317e-66	1.19993e-64
SMS	6995.74	1.12069	0.0652343	17.1795	3.78154e-66	1.20087e-64
POSTN	67137.1	2.13846	0.124477	17.1795	3.78054e-66	1.20087e-64
CLDN11	694.507	-2.41979	0.140926	-17.1706	4.40854e-66	1.39899e-64
TYMSOS	72.2711	2.20576	0.128478	17.1684	4.57756e-66	1.45159e-64
LA16c-380H5.1	34.4867	2.90644	0.169292	17.1683	4.58854e-66	1.45403e-64
LIG1	2605.92	1.07686	0.0627264	17.1675	4.64623e-66	1.47126e-64
YDJC	1092.79	1.43187	0.0834227	17.164	4.93897e-66	1.56285e-64
RP5-839B4.8	16.1667	-4.33998	0.252894	-17.1612	5.17969e-66	1.63785e-64
FANCF	1671.24	0.939905	0.0547906	17.1545	5.81818e-66	1.83844e-64
MBNL1	8415.55	-0.961731	0.0560675	-17.1531	5.95864e-66	1.88148e-64
CTA-941F9.9	8.70026	-2.47997	0.144603	-17.1502	6.26068e-66	1.97545e-64
SPATA17	354.764	1.84887	0.107848	17.1432	7.06282e-66	2.22697e-64
PSMA5	5791.44	0.883863	0.0515963	17.1303	8.81307e-66	2.77687e-64
TEAD1	4592.59	-1.29964	0.0758851	-17.1264	9.43572e-66	2.97095e-64
RP11-375I20.6	13.2733	-2.03098	0.118602	-17.1243	9.77137e-66	3.07445e-64
PTK6	1247.5	2.02895	0.118544	17.1155	1.13671e-65	3.57399e-64
TOMM40	3772.84	1.24023	0.0724897	17.109	1.27091e-65	3.99312e-64
RP1-18D14.7	10.9646	-2.24263	0.131109	-17.1051	1.36026e-65	4.27083e-64
SRSF1	11748.8	0.579431	0.0338755	17.1047	1.36878e-65	4.29455e-64
GPR89A	405.365	1.01129	0.0591345	17.1015	1.4454e-65	4.53173e-64
TSSC2	79.3648	-1.83709	0.107424	-17.1013	1.45205e-65	4.54937e-64
TACC1	6581.51	-1.80839	0.105757	-17.0995	1.49637e-65	4.68494e-64
SMIM10	230.506	-1.51068	0.0883543	-17.098	1.53546e-65	4.80392e-64
NABP2	2392.51	0.811203	0.0474448	17.0978	1.53995e-65	4.8146e-64
FGF13-AS1	12.4245	-2.96085	0.173172	-17.0977	1.54385e-65	4.8234e-64
AP004782.1	3.05798	-2.78426	0.162859	-17.0961	1.58578e-65	4.9509e-64
HABP4	648.6	-1.17553	0.0687604	-17.096	1.58905e-65	4.95765e-64
XPNPEP2	109.176	-2.81136	0.164482	-17.0923	1.69461e-65	5.28325e-64
RP4-575N6.4	13.0884	-2.016	0.117949	-17.0921	1.69814e-65	5.29055e-64
MIS18A	1011.78	1.09767	0.0642272	17.0905	1.74735e-65	5.44004e-64
AP001434.2	7.44317	4.4313	0.259486	17.0772	2.19268e-65	6.82173e-64
RP11-480I12.7	26.5475	2.13279	0.124907	17.075	2.27747e-65	7.08057e-64
TMEM79	1612.27	1.48065	0.086716	17.0747	2.2895e-65	7.11299e-64
PTPN14	4203.27	-1.61028	0.0943106	-17.0742	2.31115e-65	7.17523e-64
B4GALNT4	1833.35	1.93578	0.113381	17.0733	2.34717e-65	7.28197e-64
LINC00511	361.667	2.90415	0.1701	17.0732	2.35118e-65	7.2893e-64
MIR4653	17.888	2.65271	0.155382	17.0722	2.39081e-65	7.40702e-64
ARHGAP11B	311.679	1.61013	0.0943235	17.0703	2.46913e-65	7.64433e-64
MRPL17	3298.13	1.00525	0.058893	17.0691	2.52014e-65	7.7968e-64
CANT1	9710.86	1.30989	0.0767423	17.0687	2.53679e-65	7.84287e-64
NMRAL1	3293.71	1.17055	0.0685982	17.0638	2.75914e-65	8.52435e-64
SOGA3	5.93907	-2.04436	0.119811	-17.0633	2.78512e-65	8.59863e-64
bP-2189O9.2	8.26172	-2.94721	0.172756	-17.0599	2.9492e-65	9.09888e-64
RP11-213O5.4	2.80721	-2.0727	0.121545	-17.0529	3.32629e-65	1.02552e-63
PTPN21	1293.86	-1.44925	0.0849862	-17.0528	3.33184e-65	1.02652e-63
RP11-56D16.8	3.00106	-2.07139	0.121471	-17.0526	3.34555e-65	1.03002e-63
PDXDC1	14124.3	0.958014	0.0561804	17.0524	3.35242e-65	1.03143e-63
RP11-863K10.7	24.2125	-2.04184	0.119754	-17.0502	3.48088e-65	1.07021e-63
BUB3	8789.26	1.05621	0.0619647	17.0453	3.78589e-65	1.16318e-63
RP1-193H18.2	255.44	-1.76706	0.103686	-17.0424	3.98309e-65	1.22292e-63
TJP3	3367.68	1.73144	0.101605	17.041	4.07909e-65	1.25153e-63
PSMC4	5558.93	0.992019	0.058215	17.0406	4.10415e-65	1.25835e-63
BMPR1B	10734.2	4.2257	0.248012	17.0383	4.27057e-65	1.30847e-63
RP11-696N14.1	85.3874	-1.7669	0.103731	-17.0335	4.63518e-65	1.41921e-63
PAK3	244.612	-2.5613	0.150418	-17.0279	5.10124e-65	1.56083e-63
LBX2	80.4199	1.83052	0.107504	17.0274	5.14402e-65	1.57284e-63
CHAF1B	1288.41	1.39666	0.0820304	17.0261	5.25714e-65	1.60632e-63
AC112721.1	10.3215	3.6284	0.213124	17.0248	5.37453e-65	1.64106e-63
CHRNA9	72.2459	5.13858	0.302002	17.0151	6.35148e-65	1.93803e-63
PVALB	688.715	5.07857	0.29856	17.0102	6.89913e-65	2.10369e-63
CDH23	492.638	-1.95175	0.114776	-17.0049	7.55006e-65	2.30059e-63
DPEP1	89.8133	2.45926	0.144674	16.9986	8.40736e-65	2.56007e-63
HORMAD2-AS1	5.49812	-2.69088	0.158303	-16.9983	8.46067e-65	2.57453e-63
IGFL2	95.5029	3.12403	0.18379	16.9978	8.52296e-65	2.59171e-63
CREB3L4	7477.56	1.6818	0.0989436	16.9975	8.56556e-65	2.60289e-63
MRGPRF	413.84	-2.00619	0.118055	-16.9937	9.14564e-65	2.77726e-63
MUC1	32673.7	2.53139	0.149006	16.9885	9.98856e-65	3.03116e-63
COL22A1	509.337	3.24614	0.191088	16.9877	1.01319e-64	3.07255e-63
HIST1H4D	21.6346	3.59893	0.211863	16.9871	1.02329e-64	3.10106e-63
RIIAD1	54.5678	3.36705	0.19829	16.9805	1.14597e-64	3.47048e-63
MFAP4	4643.61	-2.47312	0.145664	-16.9782	1.19063e-64	3.60328e-63
RP11-442O1.3	5.45321	-2.01623	0.118759	-16.9775	1.20453e-64	3.64287e-63
DAB2IP	4240.87	-1.10193	0.0649108	-16.976	1.23527e-64	3.73329e-63
HOXA5	267.21	-2.35639	0.13881	-16.9756	1.24476e-64	3.75941e-63
PPP1R14B	4254.78	1.56984	0.0924836	16.9743	1.27262e-64	3.84093e-63
ZFAND5	10266.1	-0.86476	0.0509495	-16.9729	1.30396e-64	3.93287e-63
FAM110D	163.011	-2.0598	0.121363	-16.9722	1.31845e-64	3.97387e-63
KLHL13	731.491	-2.60547	0.153518	-16.9718	1.32897e-64	4.00285e-63
ADAM19	1404.17	1.69337	0.0997826	16.9706	1.35443e-64	4.07678e-63
TGFBR3	4422.37	-2.46256	0.145168	-16.9635	1.52834e-64	4.59712e-63
ACAA2	3174.59	-1.19614	0.0705291	-16.9595	1.63793e-64	4.92345e-63
H3F3A	3275.21	0.990049	0.0583789	16.959	1.65075e-64	4.95862e-63
STARD10	13998.8	2.14993	0.126791	16.9564	1.72498e-64	5.17809e-63
DBF4	903.673	1.21982	0.0719518	16.9532	1.82175e-64	5.46487e-63
SNTB2	2326.78	-0.999682	0.0590187	-16.9384	2.34481e-64	7.0292e-63
SNX33	3147.9	-0.761746	0.0449757	-16.9368	2.40792e-64	7.21352e-63
CHEK1	1032.15	1.54974	0.0915445	16.9288	2.75808e-64	8.25694e-63
EGR2	1697.53	-2.17953	0.128748	-16.9287	2.76564e-64	8.27401e-63
CA9	374.427	4.80104	0.283616	16.928	2.79774e-64	8.36443e-63
MAML2	1935.94	-1.85131	0.109393	-16.9235	3.02037e-64	9.02393e-63
APOO	991.935	1.11945	0.0661585	16.9207	3.16813e-64	9.45905e-63
TMC2	18.9493	-2.39206	0.141423	-16.9142	3.53615e-64	1.05507e-62
ADCK3	4012.38	-1.30918	0.0774023	-16.914	3.5486e-64	1.05808e-62
SDC1	22776.7	1.92505	0.113817	16.9136	3.57386e-64	1.0649e-62
TUBB3	15.0905	2.35112	0.13901	16.9132	3.59344e-64	1.07001e-62
FAM195A	1741.49	1.60851	0.0951073	16.9126	3.63579e-64	1.0819e-62
ABCB8	2269.98	0.970844	0.0574112	16.9104	3.77422e-64	1.12234e-62
KRT8	73701	1.8473	0.109257	16.9078	3.94168e-64	1.17135e-62
RP11-865I6.2	22.4895	3.8927	0.230296	16.9031	4.27215e-64	1.26871e-62
TMEM140	1519.87	-1.02428	0.0606157	-16.898	4.65467e-64	1.38138e-62
EPDR1	834.378	-1.82704	0.10814	-16.8952	4.88383e-64	1.44842e-62
LINC00641	499.628	-1.46341	0.0866232	-16.894	4.98001e-64	1.47596e-62
ADAMDEC1	541.535	3.11178	0.184195	16.894	4.98351e-64	1.47602e-62
HBA1	9.37465	-4.10022	0.24275	-16.8907	5.2658e-64	1.55858e-62
SPOCD1	314.384	2.53202	0.149927	16.8884	5.48066e-64	1.6211e-62
S100A7	1975.84	6.39608	0.378762	16.8868	5.6256e-64	1.66286e-62
BPNT1	3078.6	0.879444	0.0520863	16.8844	5.86441e-64	1.7323e-62
TMEM92	76.6131	2.60896	0.154532	16.8829	6.00908e-64	1.77386e-62
RP11-6O2.4	16.9992	-3.34706	0.198254	-16.8827	6.03727e-64	1.781e-62
RP11-438L7.3	9.66844	-1.87562	0.111137	-16.8766	6.68595e-64	1.97105e-62
MAPKAPK2	15091.8	1.08339	0.0642006	16.8751	6.85765e-64	2.02032e-62
ABCA5	1282.14	-1.51923	0.0900632	-16.8685	7.67281e-64	2.25898e-62
ALG3	3143.14	1.13809	0.0675003	16.8605	8.77686e-64	2.58231e-62
RNU6ATAC35P	4.48327	-2.59263	0.153827	-16.8542	9.76849e-64	2.87217e-62
RP11-3B7.1	15.5295	-1.84589	0.109534	-16.8522	1.0104e-63	2.96886e-62
HIST1H2BJ	199.965	2.5388	0.150655	16.8518	1.01725e-63	2.987e-62
DSN1	1656.75	1.12529	0.0667765	16.8516	1.02194e-63	2.9988e-62
ADIPOR1	11491.7	0.888817	0.0527623	16.8457	1.12876e-63	3.31006e-62
SEPHS2	8587.08	1.21694	0.0722506	16.8433	1.17449e-63	3.44188e-62
ULBP1	97.4512	3.10281	0.18422	16.843	1.18173e-63	3.46082e-62
LIMK1	3334.26	1.02656	0.0609592	16.8401	1.23929e-63	3.62699e-62
FGF14-AS2	95.346	-2.04633	0.121526	-16.8386	1.2712e-63	3.71793e-62
PECR	685.693	-1.37235	0.0815138	-16.8358	1.33362e-63	3.89794e-62
ABCB1	355.007	-2.02346	0.12022	-16.8313	1.43973e-63	4.20532e-62
ATP5G1P4	16.0519	2.51234	0.149272	16.8306	1.45674e-63	4.25222e-62
CTD-2377D24.6	24.5127	3.75083	0.222871	16.8296	1.48099e-63	4.32016e-62
CDKN2B-AS1	55.5551	2.09052	0.124228	16.8281	1.5187e-63	4.42724e-62
IL17REL	59.2823	3.55462	0.211295	16.823	1.6548e-63	4.82083e-62
CTIF	2830.12	-1.16888	0.069491	-16.8205	1.72594e-63	5.02478e-62
ZMYND10	837.272	2.52564	0.150154	16.8203	1.73208e-63	5.03936e-62
TIMM17B	2378.27	1.1964	0.0711319	16.8194	1.75925e-63	5.11506e-62
TPT1-AS1	657.366	-1.50445	0.0894473	-16.8194	1.76074e-63	5.11604e-62
DLG3	4932.47	0.976182	0.0581041	16.8006	2.41779e-63	7.02061e-62
LETMD1	2856.78	-0.80595	0.0479743	-16.7996	2.4559e-63	7.12309e-62
SYN2	246.062	-2.76255	0.164441	-16.7996	2.45629e-63	7.12309e-62
DDIAS	501.03	1.71278	0.101967	16.7975	2.54724e-63	7.382e-62
MAL2	18417.4	1.66685	0.0992409	16.796	2.61238e-63	7.56586e-62
GBX2	10.3966	4.47168	0.266284	16.7929	2.75135e-63	7.96314e-62
NDE1	2446.64	0.93785	0.0558594	16.7895	2.91393e-63	8.42819e-62
PPP2R4	13675.9	0.907334	0.0540512	16.7866	3.06123e-63	8.84848e-62
RNF125	778.682	-1.39371	0.0830328	-16.785	3.14098e-63	9.06722e-62
WBP4	882.875	-0.729482	0.0434602	-16.7851	3.1393e-63	9.06722e-62
AL928761.1	35.9288	4.75458	0.283275	16.7843	3.17941e-63	9.17219e-62
KLHL30	63.1173	-2.81677	0.167845	-16.782	3.3062e-63	9.53176e-62
UBQLN4	4735.36	0.965814	0.0575696	16.7765	3.62887e-63	1.04552e-61
RASSF7	1853.49	1.72747	0.103004	16.7708	3.98788e-63	1.14822e-61
ZNF672	2780.74	0.877228	0.0523106	16.7696	4.07152e-63	1.17154e-61
PPP2R2C	1314.99	3.5035	0.208924	16.7693	4.09473e-63	1.17745e-61
RITA1	1506.75	0.846979	0.0505112	16.7681	4.17305e-63	1.19842e-61
UBE2SP1	25.515	2.42789	0.144792	16.7682	4.17067e-63	1.19842e-61
MEF2C	1946.92	-1.38223	0.0824355	-16.7674	4.22664e-63	1.21303e-61
PGAM5	3127.91	0.923127	0.055071	16.7625	4.59065e-63	1.31665e-61
LINC01344	31.5816	3.72453	0.222317	16.7533	5.36073e-63	1.53652e-61
APOBEC3B	631.281	2.59098	0.154656	16.7531	5.37101e-63	1.53848e-61
NPHP3	468.615	-0.977883	0.0583734	-16.7522	5.45664e-63	1.562e-61
CABLES2	1114.08	1.25332	0.0748153	16.7522	5.46053e-63	1.56211e-61
ZBED3-AS1	79.3373	-1.37642	0.0821745	-16.75	5.66361e-63	1.61916e-61
DTYMK	1634.59	1.09978	0.0656645	16.7484	5.81498e-63	1.66136e-61
SYNGR2	16162.2	1.19605	0.0714135	16.7483	5.83144e-63	1.665e-61
FAM196A	737.033	3.91948	0.234052	16.7462	6.03563e-63	1.72219e-61
PCYOX1	9196.12	-1.08403	0.0647657	-16.7377	6.96404e-63	1.98583e-61
HPRT1	2307.57	1.11883	0.0668456	16.7375	6.9896e-63	1.99183e-61
AKR1C3	1480.55	-2.36776	0.141487	-16.7348	7.31143e-63	2.08221e-61
WDHD1	991.102	1.26194	0.0754338	16.7291	8.04575e-63	2.28987e-61
RPL21P135	4.10307	-2.21694	0.132525	-16.7286	8.11875e-63	2.30917e-61
ANKRD22	414.717	2.12874	0.12729	16.7236	8.81754e-63	2.50631e-61
DNAJC18	544.828	-1.02567	0.0613417	-16.7206	9.27967e-63	2.63598e-61
TUBG1	2761.33	1.10642	0.0662107	16.7106	1.09667e-62	3.1132e-61
RP11-1070N10.3	20.9714	-2.39352	0.143272	-16.7061	1.18418e-62	3.35948e-61
LPCAT1	5924.65	1.26602	0.0757975	16.7026	1.25404e-62	3.55541e-61
SMG7	8398.73	0.731263	0.043784	16.7016	1.27595e-62	3.61522e-61
CX3CL1	5766.63	-2.36301	0.141494	-16.7005	1.30019e-62	3.68154e-61
RP11-381O7.3	0.934007	-3.7502	0.224691	-16.6905	1.53692e-62	4.3491e-61
PAX7	117.355	6.87021	0.41168	16.6882	1.59695e-62	4.51608e-61
ABCC13	215.815	5.4111	0.324255	16.6878	1.60811e-62	4.54474e-61
C1orf233	1072.85	1.7517	0.104976	16.6867	1.6385e-62	4.62768e-61
STRA13	2491.67	1.47501	0.0883956	16.6865	1.64427e-62	4.64103e-61
HIST1H2BF	44.246	3.51162	0.210477	16.6841	1.71103e-62	4.8264e-61
ADH4	15.8655	-3.82052	0.229029	-16.6814	1.78939e-62	5.04425e-61
RP11-236L14.2	11.694	-2.26637	0.135865	-16.681	1.80095e-62	5.07362e-61
CTD-2224J9.8	5.98726	-2.17768	0.13055	-16.6808	1.80719e-62	5.08474e-61
LINC01058	7.37749	-1.9424	0.116445	-16.6809	1.80623e-62	5.08474e-61
CXCL9	6106.2	3.18374	0.190865	16.6806	1.81437e-62	5.1017e-61
DCAF13	4152.92	1.24835	0.0748587	16.6761	1.95429e-62	5.49166e-61
LINC00667	1512.8	-1.08502	0.0650697	-16.6747	2.00145e-62	5.62063e-61
RAPGEF3	1149.72	-1.68447	0.101029	-16.6731	2.05544e-62	5.7686e-61
GRK5	928.699	-1.22221	0.073317	-16.6702	2.15725e-62	6.05053e-61
RP5-963E22.6	26.369	2.09647	0.125809	16.6639	2.39998e-62	6.72705e-61
LHCGR	12.1545	-4.65696	0.279505	-16.6614	2.49892e-62	6.99998e-61
RP11-127I20.5	34.6791	2.14062	0.128513	16.6569	2.69504e-62	7.54457e-61
LINC01522	29.5714	4.67229	0.280507	16.6566	2.71141e-62	7.58562e-61
LRRC45	1672.15	1.51615	0.091027	16.6561	2.73449e-62	7.64538e-61
MDFIC	2620.73	-1.2592	0.0756096	-16.654	2.83149e-62	7.91161e-61
ACOT7	1810.92	1.41097	0.0847389	16.6507	2.98864e-62	8.34545e-61
VIP	9.92944	-2.05433	0.12343	-16.6437	3.36214e-62	9.38254e-61
IGSF10	564.331	-2.87512	0.172768	-16.6416	3.48435e-62	9.71745e-61
SLC9A3R1	20884.3	1.87567	0.112752	16.6354	3.86244e-62	1.07651e-60
ORAI2	3001.25	0.997628	0.0599844	16.6315	4.12327e-62	1.14849e-60
SCN11A	42.285	-2.11862	0.127408	-16.6286	4.32419e-62	1.2037e-60
RP11-624L4.1	71.0699	3.01948	0.181595	16.6276	4.39944e-62	1.22388e-60
CAPSL	74.167	3.99426	0.240319	16.6207	4.93778e-62	1.37278e-60
CTD-2154I11.2	9.38843	-1.84987	0.111322	-16.6173	5.22372e-62	1.45137e-60
PKMP3	33.8961	-1.41423	0.0851094	-16.6166	5.28286e-62	1.46688e-60
FOXO6	377.536	1.68423	0.101361	16.6162	5.31609e-62	1.47519e-60
LARP6	707.111	-1.65516	0.0996139	-16.6157	5.36191e-62	1.48698e-60
RP11-426C22.4	83.3723	1.99454	0.120054	16.6137	5.54964e-62	1.53808e-60
ARAP3	987.709	-1.21271	0.0730018	-16.612	5.7053e-62	1.58023e-60
COL5A1	28891.7	1.91728	0.115431	16.6098	5.92298e-62	1.6395e-60
MTX1	1201.47	0.868473	0.052295	16.6072	6.18239e-62	1.71024e-60
ORM1	230.034	5.29677	0.318953	16.6067	6.2289e-62	1.72204e-60
NUDT7	132.387	-1.43834	0.0866134	-16.6065	6.25729e-62	1.72881e-60
CD248	3513.33	-1.68311	0.101378	-16.6023	6.70515e-62	1.8514e-60
SIAH2	6227.14	1.66841	0.100513	16.599	7.08795e-62	1.95588e-60
RCC1	3349.36	1.17272	0.0706556	16.5977	7.24411e-62	1.99773e-60
DLK2	132.176	-1.69985	0.102463	-16.5899	8.24852e-62	2.27331e-60
RP11-1399P15.1	28.8846	3.21129	0.193575	16.5893	8.32176e-62	2.29207e-60
SYNE1	3472.03	-1.44556	0.0871473	-16.5875	8.57886e-62	2.36142e-60
CIB3	34.5736	3.08149	0.185801	16.5849	8.95918e-62	2.46458e-60
PCSK5	724.051	-1.69944	0.102493	-16.5811	9.54347e-62	2.62369e-60
FOS	21145.6	-2.56191	0.154515	-16.5804	9.66253e-62	2.65478e-60
C17orf62	4404.17	0.937431	0.0565418	16.5794	9.81806e-62	2.69584e-60
FCGR1A	319.324	1.68813	0.10187	16.5714	1.12098e-61	3.07607e-60
HSPE1	5449.29	1.16055	0.0700644	16.5641	1.26761e-61	3.4763e-60
LHX4-AS1	2706.3	0.796308	0.0480879	16.5594	1.36909e-61	3.75229e-60
HMGN1	11736.6	0.867409	0.0523895	16.5569	1.42692e-61	3.90837e-60
KANK3	271.326	-1.83484	0.110828	-16.5558	1.45486e-61	3.98243e-60
ZC3H3	2146.11	1.04567	0.0631611	16.5556	1.45988e-61	3.99372e-60
DCN	46493.6	-1.99242	0.120354	-16.5546	1.48241e-61	4.05286e-60
LINC01474	2.39089	-3.02759	0.182906	-16.5527	1.53065e-61	4.18218e-60
AC015849.15	25.5375	3.06593	0.185263	16.549	1.62671e-61	4.44189e-60
CALR	55468.7	1.07427	0.0649525	16.5394	1.91067e-61	5.2141e-60
CTA-407F11.8	3.73279	-2.7544	0.166559	-16.537	1.98609e-61	5.41658e-60
SNRK	2847.47	-0.846883	0.0512247	-16.5327	2.13276e-61	5.81301e-60
RP11-517I3.1	25.41	-1.94184	0.117492	-16.5275	2.32669e-61	6.33768e-60
SLC39A11	5726.76	1.4432	0.0873325	16.5254	2.40955e-61	6.55938e-60
ADAR	34485.3	0.925079	0.0559873	16.523	2.50585e-61	6.81736e-60
EEF1A2	6064.52	3.51172	0.212542	16.5225	2.528e-61	6.87341e-60
PPP1R37	3756.8	1.19074	0.0720682	16.5224	2.53294e-61	6.88262e-60
MBNL1-AS1	239.048	-1.76225	0.106725	-16.512	3.00595e-61	8.16291e-60
HIST2H2BC	27.0734	2.03336	0.123147	16.5116	3.02534e-61	8.21057e-60
TNMD	138.08	-3.91069	0.236854	-16.5109	3.06106e-61	8.30244e-60
KCNJ3	3240.73	5.18507	0.314066	16.5095	3.13443e-61	8.49622e-60
ZDHHC12	2112.49	1.20532	0.0730105	16.5089	3.16812e-61	8.58232e-60
BLOC1S3	1265.04	0.793842	0.0481017	16.5034	3.46705e-61	9.3864e-60
GINS4	580.149	1.9568	0.118576	16.5026	3.51614e-61	9.5135e-60
EIF3L	9788.38	-1.04555	0.0633726	-16.4985	3.76016e-61	1.01675e-59
MIR143	7.89909	-3.88699	0.235623	-16.4967	3.87729e-61	1.04779e-59
CTD-2536I1.2	13.2	-2.2359	0.135574	-16.4921	4.18347e-61	1.12984e-59
MMP28	329.312	-1.99757	0.121136	-16.4903	4.31131e-61	1.16366e-59
HOXC-AS3	75.3896	3.47762	0.210913	16.4884	4.44628e-61	1.19936e-59
SULF1	16749.1	1.88631	0.114412	16.487	4.54848e-61	1.22618e-59
MFSD3	1741.49	1.64775	0.0999458	16.4865	4.59024e-61	1.23669e-59
GPR182	15.3605	-2.35218	0.142775	-16.4748	5.56832e-61	1.49929e-59
RFX5	3878.22	0.907081	0.0550671	16.4723	5.80334e-61	1.56163e-59
RP11-467I17.1	1.81944	-4.06691	0.246911	-16.4712	5.913e-61	1.59018e-59
PARD3B	1248.36	-1.15799	0.0703262	-16.4659	6.44705e-61	1.73275e-59
CDKN2A	1206.42	2.76617	0.168126	16.453	7.98445e-61	2.14465e-59
FAM57B	132.385	2.86183	0.174004	16.4469	8.83115e-61	2.37064e-59
PMM2	1198.52	0.95964	0.058354	16.4451	9.08747e-61	2.43798e-59
NIPSNAP1	5164.73	0.985053	0.0599119	16.4417	9.62117e-61	2.5796e-59
AC105053.3	1.63042	-2.70589	0.164598	-16.4394	9.99627e-61	2.67855e-59
RTKN	3007.3	1.05638	0.0642708	16.4364	1.05e-60	2.81184e-59
ABHD12	5173.49	1.12257	0.0683093	16.4337	1.09776e-60	2.93797e-59
NMU	92.1069	3.62453	0.220559	16.4334	1.10318e-60	2.95069e-59
LINC01586	2.04569	-3.44758	0.209794	-16.4332	1.10684e-60	2.95869e-59
ICAM2	478.88	-1.44768	0.0880991	-16.4325	1.12031e-60	2.99289e-59
FAM102A	11805.7	1.1154	0.0678797	16.432	1.12852e-60	3.01303e-59
BRCA2	683.155	1.52554	0.0928404	16.4319	1.13059e-60	3.01673e-59
ARL4A	1319.84	-1.54719	0.094186	-16.4269	1.2272e-60	3.27255e-59
IL33	1108.66	-2.70334	0.164588	-16.4249	1.26807e-60	3.37951e-59
SCN3A	95.2641	-2.83282	0.172729	-16.4004	1.89946e-60	5.0592e-59
RP11-71E19.2	1.3781	-3.79087	0.23116	-16.3993	1.93405e-60	5.14823e-59
RP11-203I2.1	17.2978	-2.83843	0.173111	-16.3966	2.02307e-60	5.38197e-59
HIST1H3B	16.2924	4.33358	0.264444	16.3875	2.34809e-60	6.24288e-59
KIF1A	1008.88	4.6261	0.282344	16.3846	2.46427e-60	6.54784e-59
LINGO1	1387.67	2.50753	0.153046	16.3842	2.48063e-60	6.5874e-59
AC002451.3	6.88254	-2.12052	0.129432	-16.3833	2.51535e-60	6.6756e-59
UQCC2	2233.47	1.19624	0.0730272	16.3808	2.62365e-60	6.95886e-59
C20orf144	25.5181	1.82068	0.111158	16.3792	2.69212e-60	7.13621e-59
LA16c-312E8.4	140.432	3.12013	0.190508	16.3779	2.74942e-60	7.28374e-59
CAPS	2798.43	2.19138	0.133818	16.3759	2.8445e-60	7.53114e-59
LGALS17A	72.6138	3.64289	0.222552	16.3688	3.19625e-60	8.4574e-59
LRRC46	337.863	2.10663	0.128701	16.3684	3.21311e-60	8.49695e-59
ADAMTSL2	569.089	1.65725	0.10125	16.3679	3.24281e-60	8.5704e-59
RP11-298O21.2	1.94077	-2.5372	0.155057	-16.363	3.51471e-60	9.28348e-59
SOCS3	4991.88	-1.91204	0.116879	-16.3591	3.7461e-60	9.88877e-59
ACAD11	38.8306	-1.25479	0.0767156	-16.3564	3.91874e-60	1.03384e-58
RHNO1	2117.25	0.982207	0.0600732	16.3502	4.33746e-60	1.14362e-58
KLHL10	7.9146	-1.58977	0.0972643	-16.3448	4.73365e-60	1.24734e-58
BAK1	1395.51	1.02673	0.0628337	16.3405	5.08478e-60	1.33907e-58
NAT1	7754.1	3.22797	0.197579	16.3376	5.32908e-60	1.40258e-58
PPP6R1	5466.43	0.820787	0.0502416	16.3368	5.3994e-60	1.42024e-58
PPM1F	2158.34	-0.991449	0.0607028	-16.3329	5.76265e-60	1.5149e-58
FBLN5	3846.31	-1.8068	0.110647	-16.3294	6.0991e-60	1.60239e-58
CFB	3441.71	2.54715	0.15601	16.3269	6.35608e-60	1.66892e-58
MXD3	511.703	1.65772	0.101562	16.3222	6.86076e-60	1.80037e-58
GRIN2D	265.787	2.21924	0.135968	16.3218	6.9118e-60	1.81269e-58
TXNDC17	2105.39	1.08658	0.0665839	16.319	7.22779e-60	1.89445e-58
CNTNAP3B	58.087	-2.73925	0.167868	-16.3178	7.36893e-60	1.9303e-58
PSME2	8137.44	1.26214	0.0774014	16.3064	8.88347e-60	2.32567e-58
PELI2	592.751	-1.6991	0.104205	-16.3054	9.03222e-60	2.36322e-58
ASCL1	238.651	6.236	0.382683	16.2955	1.06253e-59	2.7784e-58
STX1A	473.802	1.5119	0.0927823	16.2951	1.06914e-59	2.79405e-58
HIST1H4E	46.5514	3.17698	0.194986	16.2934	1.10003e-59	2.87308e-58
CST5	202.312	6.5961	0.404936	16.2892	1.1768e-59	3.07177e-58
VAMP8	7649.42	1.07967	0.0662907	16.2869	1.22313e-59	3.19085e-58
ERMN	115.03	2.54602	0.156364	16.2826	1.31215e-59	3.42105e-58
SIPA1L3	5547.79	1.08006	0.0663409	16.2804	1.35926e-59	3.54181e-58
SNRPEP2	43.38	1.2886	0.079169	16.2765	1.44857e-59	3.77232e-58
FAM173A	831.763	1.78779	0.109842	16.276	1.46033e-59	3.80071e-58
ARPC5L	2971.82	0.946146	0.0581376	16.2743	1.5032e-59	3.91e-58
RASSF9	248.364	-2.04365	0.125584	-16.2732	1.52968e-59	3.97654e-58
BRI3BP	2253.38	1.09861	0.0675378	16.2666	1.70282e-59	4.42404e-58
MEOX1	473.094	-2.67199	0.164312	-16.2617	1.84586e-59	4.79287e-58
DUSP1	11816.4	-2.0009	0.123058	-16.2598	1.90342e-59	4.93945e-58
HMGA1	8189.93	1.57583	0.0969353	16.2565	2.00921e-59	5.21094e-58
MIR99AHG	230.113	-1.97346	0.121417	-16.2536	2.10782e-59	5.46348e-58
SMC4	3739.13	1.50377	0.0925394	16.2501	2.2316e-59	5.78095e-58
ARFGAP1	5579.22	1.10862	0.0682387	16.2463	2.37378e-59	6.14569e-58
CYP2B7P	8087.01	4.3387	0.267141	16.2413	2.57583e-59	6.6649e-58
UNC13A	173.726	3.35575	0.20662	16.2412	2.57878e-59	6.66864e-58
RP11-92K15.3	56.8119	2.03487	0.125333	16.2358	2.81592e-59	7.27765e-58
OCIAD2	2520.33	1.08953	0.0671128	16.2342	2.88761e-59	7.4586e-58
PFDN6	2155	1.1969	0.0737304	16.2334	2.92682e-59	7.55548e-58
IGHE	84.0134	4.03367	0.248601	16.2255	3.33148e-59	8.59511e-58
PSAT1P3	5.3233	-2.42869	0.149698	-16.2239	3.41649e-59	8.8093e-58
HIST2H2BE	4624.79	2.00754	0.123796	16.2165	3.85427e-59	9.93234e-58
AC133644.2	38.3294	1.90346	0.117405	16.2128	4.09498e-59	1.05465e-57
RP11-98G7.1	32.9261	2.22872	0.137481	16.2111	4.21272e-59	1.08435e-57
TCTEX1D2	329.397	1.22303	0.0754526	16.2093	4.33639e-59	1.11553e-57
MRGBP	1359.26	1.05996	0.0654191	16.2026	4.83159e-59	1.24221e-57
CTD-2521M24.11	3.45847	-3.27677	0.202262	-16.2006	4.99369e-59	1.28314e-57
VIT	349.06	-2.80326	0.173084	-16.196	5.38143e-59	1.38197e-57
KRT19	91506	1.92123	0.118628	16.1954	5.43566e-59	1.39509e-57
ILF2	15793.4	0.98277	0.0606853	16.1945	5.51255e-59	1.41401e-57
YIF1B	2183.1	1.13532	0.0701211	16.1909	5.84655e-59	1.49881e-57
RP4-673D20.3	12.3057	-2.84436	0.17574	-16.1851	6.42566e-59	1.64633e-57
TMEM245	5272.84	-0.938675	0.0580091	-16.1815	6.80975e-59	1.74373e-57
RP11-731F5.2	46.1761	4.13151	0.25534	16.1804	6.93161e-59	1.77391e-57
ENTPD7	1014.65	1.18478	0.0732412	16.1764	7.39778e-59	1.89212e-57
RP3-323A16.1	46.1081	3.0333	0.187548	16.1734	7.76351e-59	1.98452e-57
C3orf36	26.8587	1.89714	0.117336	16.1685	8.4189e-59	2.15081e-57
SYT5	74.2997	3.97129	0.245622	16.1683	8.43727e-59	2.15427e-57
DNASE2	5364.37	0.850563	0.0526099	16.1673	8.5715e-59	2.18728e-57
VIM	61994.6	-1.41288	0.0874039	-16.165	8.90722e-59	2.27165e-57
TSPAN17	2835.36	0.891474	0.0551503	16.1644	8.98535e-59	2.29026e-57
APITD1	223.616	1.08342	0.0670282	16.1636	9.10612e-59	2.31971e-57
PDRG1	1860.35	1.14588	0.0709007	16.1617	9.38837e-59	2.39024e-57
KDM5B	10725.9	1.0119	0.0626306	16.1566	1.01968e-58	2.59459e-57
SMKR1	199.927	2.00316	0.124016	16.1524	1.09261e-58	2.77855e-57
RNPS1	8105.82	0.758782	0.0469803	16.1511	1.11614e-58	2.83677e-57
IDH2	13326.2	1.43528	0.0888707	16.1502	1.13129e-58	2.87364e-57
TMEM178A	153.29	-2.11376	0.130922	-16.1452	1.22688e-58	3.11467e-57
RP11-783K16.13	69.9446	1.27053	0.0787125	16.1414	1.30555e-58	3.31249e-57
PRDM5	248.168	-1.41383	0.0875997	-16.1396	1.34313e-58	3.40588e-57
MED25	3391.91	0.931353	0.0577087	16.1389	1.35981e-58	3.44622e-57
MAPK15	940.365	2.69474	0.166998	16.1364	1.41652e-58	3.5879e-57
LRRC73	172.536	2.09148	0.129631	16.1341	1.46845e-58	3.71731e-57
PENK	111.314	-3.83377	0.237635	-16.133	1.49485e-58	3.78198e-57
DNAAF3	220.107	2.43927	0.151272	16.1251	1.69987e-58	4.29825e-57
GLYCTK	218.112	-1.37123	0.0850461	-16.1234	1.74866e-58	4.4191e-57
FARSA	3959.57	0.877499	0.0544581	16.1133	2.05803e-58	5.19796e-57
GLP2R	36.2296	-3.41996	0.212269	-16.1115	2.11859e-58	5.34788e-57
SLC30A8	2118.23	5.31348	0.329801	16.1112	2.12962e-58	5.37266e-57
DNMT1	6305.12	1.01027	0.0627071	16.111	2.13665e-58	5.38734e-57
RP11-347C12.10	295.373	1.69895	0.105473	16.1079	2.24419e-58	5.65529e-57
GFER	1344.81	1.18384	0.0734956	16.1076	2.25432e-58	5.67438e-57
PPP1R14BP3	693.488	1.59613	0.0990911	16.1077	2.25402e-58	5.67438e-57
RP6-65G23.3	126.735	1.52619	0.0947521	16.1072	2.27114e-58	5.71346e-57
TLR4	1250.33	-1.50212	0.0933232	-16.0959	2.72529e-58	6.85208e-57
PI16	1137.02	-3.67767	0.228517	-16.0937	2.82546e-58	7.09994e-57
2020-09-10	3323.54	-0.995415	0.06186	-16.0914	2.93058e-58	7.35992e-57
SLC39A4	1420.07	1.94599	0.120964	16.0874	3.1272e-58	7.84927e-57
AXIN1	2991.69	0.912136	0.0567063	16.0853	3.23619e-58	8.11824e-57
TLE3	8417.61	1.00203	0.0623052	16.0827	3.37541e-58	8.46271e-57
STIP1	11284.7	1.01426	0.063103	16.0731	3.93663e-58	9.86422e-57
CUBN	158.703	-1.58328	0.0985152	-16.0714	4.04625e-58	1.01332e-56
APEX2	2539.65	0.858511	0.0534458	16.0632	4.61991e-58	1.15633e-56
LHFPL5	40.0216	3.84684	0.239533	16.0598	4.88515e-58	1.22203e-56
LMO2	899.82	-1.1931	0.0742918	-16.0596	4.89618e-58	1.2241e-56
RP11-443B20.1	65.7869	1.61301	0.100477	16.0536	5.39771e-58	1.34873e-56
RAPGEF2	2286.38	-0.952722	0.0593512	-16.0523	5.51088e-58	1.37623e-56
ABHD11	3372.55	1.36537	0.0850583	16.0522	5.51697e-58	1.37698e-56
U2AF2	9527.98	0.735769	0.0458419	16.0501	5.7027e-58	1.42254e-56
HNRNPC	27202.7	0.496861	0.0309639	16.0465	6.05264e-58	1.50898e-56
MRPL13	2869.03	1.22985	0.0766495	16.0452	6.17723e-58	1.53918e-56
BARD1	1064.52	1.15806	0.0721971	16.0402	6.69277e-58	1.6667e-56
DNAJA3	4498.63	0.78012	0.0486532	16.0343	7.36125e-58	1.83215e-56
ZMYND19	1309.38	1.04626	0.0652575	16.0329	7.5317e-58	1.87352e-56
VTI1B	4492.86	-0.714203	0.0445678	-16.0251	8.5371e-58	2.12243e-56
ZBTB4	7367.32	-0.852791	0.0532203	-16.0238	8.71776e-58	2.16613e-56
ADH1C	187.168	-3.42579	0.213811	-16.0225	8.89435e-58	2.20877e-56
ANGPTL7	79.6047	-4.1711	0.260381	-16.0192	9.37746e-58	2.32744e-56
ANKRD29	407.55	-2.2058	0.137743	-16.0139	1.02155e-57	2.53404e-56
TRAF7	6465.42	0.814425	0.0508746	16.0085	1.11503e-57	2.76437e-56
CKAP4	9202.24	1.0223	0.0638798	16.0035	1.20763e-57	2.99226e-56
SHMT1	2080.1	-1.06252	0.0664309	-15.9944	1.39899e-57	3.46449e-56
XIRP1	116.721	3.15193	0.197077	15.9933	1.42193e-57	3.51934e-56
C9orf117	258.666	1.44349	0.0902918	15.9869	1.5761e-57	3.89874e-56
PSMD14	4171.7	0.818574	0.0512075	15.9854	1.61429e-57	3.99099e-56
DMBX1	40.8495	3.17713	0.198799	15.9816	1.71626e-57	4.24072e-56
ZNF25	1001.68	-0.855225	0.0535151	-15.981	1.73276e-57	4.27913e-56
CYB5R3	11856.7	-0.919186	0.0575232	-15.9794	1.77889e-57	4.39061e-56
LRRC59	12053.4	1.30949	0.0819639	15.9765	1.86428e-57	4.59879e-56
OASL	1185.14	2.36524	0.148055	15.9755	1.89468e-57	4.67119e-56
FOXO4	1565.05	-1.00636	0.0630388	-15.9642	2.27087e-57	5.59556e-56
TGFBR3L	36.5093	3.12522	0.195905	15.9527	2.72732e-57	6.71657e-56
SAMD10	714.268	1.23302	0.0773146	15.9481	2.93781e-57	7.23092e-56
RBBP8NL	514.289	1.61291	0.101144	15.9467	3.0024e-57	7.38581e-56
PIGU	1962.51	0.940382	0.0589712	15.9465	3.01478e-57	7.41216e-56
AC073850.6	11.5911	-3.84941	0.241509	-15.939	3.39697e-57	8.34719e-56
SRSF9	4588.95	0.706672	0.0443394	15.9378	3.46431e-57	8.50795e-56
C9orf163	43.4792	1.67832	0.105352	15.9307	3.88049e-57	9.52478e-56
ITGA1	3934.26	-1.24477	0.07814	-15.93	3.9239e-57	9.62602e-56
TRBV26OR9-2	1.73056	-3.47838	0.218375	-15.9284	4.0227e-57	9.86295e-56
LRFN2	55.4569	2.77742	0.17443	15.9228	4.40008e-57	1.07823e-55
ENTHD1	21.3067	2.8695	0.180244	15.92	4.60034e-57	1.12668e-55
INSM1	248.868	4.61005	0.289659	15.9154	4.9525e-57	1.21226e-55
PP14571	459.762	3.14477	0.19762	15.9132	5.12999e-57	1.25501e-55
COMMD5	1979.84	1.05499	0.0663224	15.9069	5.67467e-57	1.3875e-55
PAICS	10616.6	0.998694	0.0627861	15.9063	5.73012e-57	1.40029e-55
HIST2H2BF	185.255	2.58385	0.162499	15.9007	6.2708e-57	1.53157e-55
CD276	7511.42	0.929987	0.0584986	15.8976	6.58324e-57	1.607e-55
C1orf35	1437.29	1.2226	0.0769074	15.8971	6.63724e-57	1.61929e-55
TMEM43	6737.87	-0.747272	0.0470078	-15.8968	6.67108e-57	1.62665e-55
PVRL3	292.628	-1.76196	0.110881	-15.8906	7.36241e-57	1.79424e-55
RP11-429J17.5	10.0707	3.73574	0.235111	15.8892	7.52466e-57	1.83277e-55
RP11-714L20.1	2.79236	-2.26515	0.142599	-15.8847	8.08399e-57	1.96793e-55
TSPAN13	17974.9	1.60259	0.100892	15.8842	8.15257e-57	1.98354e-55
SAC3D1	813.982	1.44505	0.0909763	15.8838	8.20142e-57	1.99433e-55
KNSTRN	1100.4	1.18352	0.074517	15.8825	8.37461e-57	2.03533e-55
SPAG1	1109.24	1.34925	0.0849657	15.8799	8.72675e-57	2.11976e-55
ARRDC1	3588.04	1.17037	0.0737114	15.8777	9.03872e-57	2.19433e-55
CEP85	1413.82	1.04973	0.0661182	15.8765	9.2111e-57	2.23496e-55
RFC4	1373.56	1.24793	0.0786041	15.8761	9.27231e-57	2.24859e-55
LSM14B	3617.4	0.860551	0.0542363	15.8667	1.07779e-56	2.61226e-55
SCN2B	93.6936	-2.84106	0.179067	-15.866	1.09023e-56	2.64099e-55
PC	2859.24	-1.52788	0.0963034	-15.8653	1.10184e-56	2.66764e-55
SLC25A44	3341.69	0.644724	0.040661	15.8561	1.27614e-56	3.08796e-55
RFTN2	286.705	-1.33502	0.0842053	-15.8544	1.31089e-56	3.17032e-55
DEGS2	4319.9	2.52187	0.159065	15.8543	1.31342e-56	3.17472e-55
CYB561	12187.3	1.32204	0.0833945	15.8528	1.34421e-56	3.24738e-55
TTYH3	6418.19	1.28982	0.0813654	15.8521	1.35899e-56	3.28129e-55
ZNF467	1319.59	1.5273	0.0963595	15.85	1.40614e-56	3.39329e-55
LRRC3B	17.2649	-3.55681	0.224406	-15.8499	1.4083e-56	3.39667e-55
CETN4P	6.62881	-1.97965	0.124918	-15.8476	1.46e-56	3.51945e-55
PRDM11	671.181	-1.0447	0.0659247	-15.8468	1.47891e-56	3.5631e-55
RP11-166D19.1	842.285	-1.63788	0.103363	-15.8459	1.49963e-56	3.61105e-55
GPR124	2457.74	-1.43606	0.0906376	-15.844	1.54612e-56	3.72098e-55
MPDZ	2577.05	-1.20792	0.0762556	-15.8403	1.63921e-56	3.9429e-55
RUNX1T1	471.778	-1.75179	0.110606	-15.8381	1.69749e-56	4.08086e-55
JAZF1-AS1	5.48628	-1.72995	0.109249	-15.8349	1.78772e-56	4.29546e-55
POLA2	1493.98	0.936927	0.0591697	15.8346	1.79673e-56	4.31476e-55
KCNE1	21.2293	-2.48926	0.15721	-15.834	1.81274e-56	4.35088e-55
PTGIS	1945.88	-2.01502	0.12728	-15.8313	1.89195e-56	4.53854e-55
SIX4	1386.91	1.59115	0.100571	15.8211	2.22447e-56	5.33333e-55
RGS19	1106.81	1.05553	0.0667174	15.821	2.23048e-56	5.34485e-55
ABHD17C	1911.39	1.40086	0.0885477	15.8204	2.25159e-56	5.39252e-55
ARHGAP10	956.685	-1.38053	0.0872637	-15.8202	2.25666e-56	5.40088e-55
HIST1H4H	462.254	2.59513	0.164039	15.8202	2.25751e-56	5.40088e-55
POGK	7160.01	0.865081	0.0547043	15.8138	2.5004e-56	5.97876e-55
ACKR3	2206.38	-1.78368	0.112797	-15.8131	2.52574e-56	6.0361e-55
MFSD12	3035.29	1.01642	0.0642931	15.8092	2.68799e-56	6.4204e-55
SDF2L1	1182.39	1.51477	0.0958354	15.8059	2.83259e-56	6.76213e-55
IGIP	825.179	-1.00973	0.0638863	-15.8051	2.86752e-56	6.84185e-55
TNNI3	90.5399	4.08456	0.258466	15.8031	2.96115e-56	7.06146e-55
ETFDH	1422.1	-0.891517	0.0564225	-15.8007	3.07537e-56	7.32991e-55
TMEM54	3053.3	1.30042	0.0823045	15.8002	3.10294e-56	7.39165e-55
CPNE7	561.477	2.60082	0.164631	15.7979	3.21711e-56	7.65951e-55
PIGQ	4653.92	1.23951	0.0784668	15.7966	3.28479e-56	7.81646e-55
F11R	10317.2	0.957926	0.0606499	15.7944	3.4025e-56	8.09222e-55
TPSP2	152.794	3.76561	0.238468	15.7908	3.59911e-56	8.55525e-55
RUNDC3B	130.449	-1.66539	0.10549	-15.7871	3.81593e-56	9.0658e-55
ADSS	6072.91	0.858755	0.0544101	15.783	4.07389e-56	9.67346e-55
RP11-20J15.5	5.03903	-2.27216	0.144009	-15.7778	4.41994e-56	1.04896e-54
C2orf54	1006.74	3.8455	0.243741	15.777	4.48237e-56	1.0632e-54
PCDHGB7	270.972	-1.71336	0.108646	-15.7702	4.99271e-56	1.18362e-54
RP11-91K11.2	2.5983	-4.39745	0.278852	-15.7698	5.01987e-56	1.18943e-54
LHX6	424.731	-1.73197	0.109836	-15.7687	5.11188e-56	1.21058e-54
GLRA4	9.55102	-3.29277	0.208829	-15.7677	5.18727e-56	1.22778e-54
KCNF1	497.167	3.48495	0.221089	15.7627	5.62116e-56	1.32977e-54
USP53	2734.44	-1.25379	0.0795698	-15.7572	6.13262e-56	1.45e-54
ZNF366	165.006	-1.75878	0.11164	-15.7541	6.44038e-56	1.52195e-54
LCA5	533.335	-1.25523	0.0796848	-15.7525	6.60594e-56	1.56025e-54
SPEF1	160.949	2.44278	0.15508	15.7518	6.67862e-56	1.57657e-54
C6orf1	1639.25	1.16106	0.0737433	15.7446	7.4841e-56	1.76578e-54
FILIP1	429.431	-1.64008	0.104176	-15.7433	7.63525e-56	1.80049e-54
RP11-386I14.2	2.79397	-2.50807	0.159321	-15.7423	7.76251e-56	1.82952e-54
R3HDM4	4857.63	0.880767	0.0559613	15.7389	8.19044e-56	1.92936e-54
YAP1	6890.22	-1.10823	0.0704203	-15.7373	8.39347e-56	1.97614e-54
AC116035.1	3.86484	-3.2256	0.204969	-15.7371	8.42805e-56	1.98323e-54
THOC6	1907.98	1.10495	0.0702289	15.7336	8.90645e-56	2.09469e-54
GNG12-AS1	45.5318	-1.75451	0.111562	-15.7267	9.91976e-56	2.33177e-54
MIR568	57.3977	-1.44921	0.0921495	-15.7267	9.92752e-56	2.33236e-54
CTD-2396E7.11	694.184	1.3269	0.0843732	15.7266	9.94589e-56	2.33544e-54
AF001548.3	5.48388	-3.50121	0.222683	-15.7229	1.05456e-55	2.47495e-54
KLKP1	16.1182	3.16145	0.201129	15.7185	1.12947e-55	2.64936e-54
CAPN9	493.486	2.71736	0.172888	15.7175	1.14788e-55	2.69113e-54
PGM1	4506.02	-1.26914	0.0807497	-15.7169	1.15795e-55	2.71331e-54
SFXN1	2754.39	1.09495	0.0696824	15.7135	1.22283e-55	2.86381e-54
PPP1R15A	3699.39	-1.25018	0.0795704	-15.7116	1.26001e-55	2.94934e-54
LYPD1	88.2578	2.18264	0.138939	15.7093	1.30573e-55	3.05314e-54
RPS4XP5	3.30878	-2.48161	0.15797	-15.7093	1.30522e-55	3.05314e-54
SCX	72.8341	2.40376	0.153062	15.7045	1.40917e-55	3.29328e-54
AMZ1	251.604	2.65848	0.169317	15.7012	1.48486e-55	3.46833e-54
TDRKH	1624.34	1.15773	0.0737818	15.6913	1.73395e-55	4.04804e-54
PPP1R14A	305.741	-2.31635	0.147638	-15.6894	1.78703e-55	4.16977e-54
TTC7B	934.915	-1.00236	0.0638899	-15.6889	1.80261e-55	4.2039e-54
XPO6	6938.9	0.646012	0.0411808	15.6872	1.85027e-55	4.31279e-54
FGD4	1087.45	-1.22121	0.0778524	-15.6862	1.8793e-55	4.37817e-54
FAM212B	498.569	-1.36815	0.0872225	-15.6857	1.89484e-55	4.41206e-54
PRR14	2748.83	0.810213	0.0516598	15.6836	1.95705e-55	4.55453e-54
PRR7	217.689	1.9281	0.12297	15.6794	2.09192e-55	4.86584e-54
RP11-524N5.1	2.97213	-2.84222	0.181309	-15.6761	2.20466e-55	5.1254e-54
CTA-392C11.1	178.717	6.94551	0.443072	15.6758	2.21404e-55	5.14453e-54
AGMAT	149.286	1.46692	0.0936036	15.6716	2.36439e-55	5.49099e-54
TMED9	11694.7	0.942034	0.060111	15.6716	2.36606e-55	5.49201e-54
KLHL21	3428.33	-1.12951	0.0720874	-15.6687	2.47773e-55	5.74822e-54
RDH16	191.858	2.67705	0.170874	15.6669	2.5487e-55	5.90978e-54
VSTM2A	1288.01	6.33455	0.404598	15.6564	3.00498e-55	6.96411e-54
RP1-228H13.5	255.284	1.19416	0.0762764	15.6557	3.03616e-55	7.03271e-54
LDB3	118.025	-1.62608	0.103884	-15.6528	3.17852e-55	7.35863e-54
PYDC1	357.057	4.72509	0.301872	15.6526	3.18892e-55	7.37887e-54
PCDH17	684.463	1.33473	0.0852783	15.6515	3.24691e-55	7.50913e-54
SLC39A7	12574.8	0.97464	0.0622743	15.6507	3.28355e-55	7.58992e-54
CHPF2	4452.1	0.840567	0.0537086	15.6505	3.29611e-55	7.615e-54
RP11-359E3.4	100.129	-1.00753	0.0643842	-15.6486	3.39365e-55	7.83627e-54
EEF2KMT	731.315	0.814523	0.0520584	15.6463	3.51915e-55	8.12184e-54
CREBRF	2013.75	-0.997837	0.0637779	-15.6455	3.56564e-55	8.22487e-54
ARL6IP1	19736.4	0.972888	0.0621837	15.6454	3.57095e-55	8.23284e-54
NRSN2	3278.31	1.02131	0.0652834	15.6442	3.6374e-55	8.38168e-54
ACTL6A	4174.95	0.914043	0.0584432	15.6399	3.89555e-55	8.97187e-54
CTPS1	2177.57	1.34107	0.0857513	15.6391	3.94228e-55	9.07481e-54
DPY30	2416.14	0.836865	0.0535135	15.6384	3.98638e-55	9.17156e-54
CRABP2	31147.2	2.14727	0.137314	15.6376	4.03422e-55	9.27683e-54
TDRD10	62.4264	-1.98364	0.12688	-15.6339	4.27532e-55	9.82615e-54
RP3-337H4.8	41.4862	1.4083	0.0900867	15.6327	4.35835e-55	1.00118e-53
C1orf43	18454	0.773468	0.0494788	15.6323	4.38555e-55	1.00691e-53
HADHA	13966.4	-0.603426	0.0386028	-15.6316	4.43181e-55	1.017e-53
TNNT3	124.195	-2.98864	0.191209	-15.6303	4.52965e-55	1.03892e-53
LPAR2	1288.88	1.15788	0.074085	15.6291	4.61207e-55	1.05728e-53
COL4A3BP	2971.74	-0.933842	0.0597647	-15.6253	4.89482e-55	1.12152e-53
CCDC152	132.888	-1.47467	0.0943831	-15.6243	4.97204e-55	1.13862e-53
MYO19	2401.79	1.04354	0.0668109	15.6193	5.37905e-55	1.2312e-53
WDR86	240.965	-2.03018	0.13002	-15.6144	5.81084e-55	1.32934e-53
MB	1623.51	1.92097	0.123046	15.6118	6.05177e-55	1.38375e-53
LINC01281	10.682	4.20879	0.269594	15.6116	6.07107e-55	1.38744e-53
MMP27	17.4448	-2.74865	0.176088	-15.6095	6.27265e-55	1.43278e-53
GMIP	1419.44	0.95571	0.0612501	15.6034	6.89972e-55	1.5752e-53
SCUBE3	1299.35	2.88637	0.185094	15.5941	7.98432e-55	1.82188e-53
WDR86-AS1	59.916	-2.30626	0.147914	-15.5919	8.26361e-55	1.88464e-53
EIF4A3	6784.91	0.860589	0.055198	15.5909	8.38999e-55	1.91248e-53
VPS72	3501.02	0.934754	0.059961	15.5894	8.59997e-55	1.95934e-53
RP11-465N4.4	91.2903	1.3471	0.0864212	15.5876	8.84055e-55	2.01312e-53
ATP6V0C	2306.73	1.00618	0.0645573	15.5858	9.09552e-55	2.07012e-53
C2orf88	286.747	-2.26606	0.14544	-15.5808	9.83652e-55	2.23762e-53
EXOSC4	1541.83	1.51916	0.0975073	15.5799	9.96818e-55	2.26641e-53
CTA-212A2.1	23.4509	-1.60707	0.103151	-15.5798	9.98301e-55	2.26862e-53
TMEM238	298.574	1.92031	0.123303	15.574	1.09358e-54	2.48388e-53
AAGAB	4708.99	0.813437	0.0522398	15.5712	1.14226e-54	2.59311e-53
COPA	26742.2	0.831919	0.0534337	15.5692	1.17934e-54	2.67592e-53
STARD8	632.83	-1.14493	0.0735699	-15.5625	1.30884e-54	2.96824e-53
RET	3923.77	2.91155	0.187099	15.5615	1.32913e-54	3.01273e-53
DNAJC9	1256.41	0.899215	0.0577902	15.56	1.36114e-54	3.0837e-53
TMEM97	2376.31	1.53326	0.0985535	15.5577	1.41178e-54	3.19681e-53
ARMC3	152.392	2.85731	0.183663	15.5573	1.4197e-54	3.21309e-53
NMB	399.86	-1.87432	0.120485	-15.5564	1.44014e-54	3.25769e-53
PYCARD	2338.27	1.88613	0.121293	15.5501	1.58771e-54	3.58967e-53
DSC1	44.8801	-2.6335	0.169357	-15.55	1.59065e-54	3.5945e-53
RP11-25L3.3	7.65819	4.47522	0.287805	15.5495	1.60353e-54	3.62177e-53
RP11-236F9.2	3.48347	-3.88879	0.250103	-15.5487	1.62263e-54	3.66305e-53
RP11-98D18.9	57.1201	1.32222	0.0850678	15.5432	1.77012e-54	3.99396e-53
LPAR6	1928.57	-1.06293	0.0684006	-15.5398	1.86642e-54	4.2091e-53
AP001189.4	24.9525	-1.91878	0.123505	-15.5361	1.97645e-54	4.45499e-53
CDC42EP2	855.057	-1.16879	0.0752347	-15.5353	2.00132e-54	4.50876e-53
RP11-22C11.2	187.44	1.68508	0.108471	15.5348	2.0174e-54	4.54268e-53
LINC00982	28.122	-2.27232	0.14631	-15.5308	2.14599e-54	4.82978e-53
RBPMS2	274.083	-1.6863	0.108596	-15.5281	2.23769e-54	5.03362e-53
RP11-465L10.10	18.6428	2.90921	0.187445	15.5203	2.52754e-54	5.68275e-53
C16orf71	220.343	1.73501	0.111802	15.5185	2.60019e-54	5.84313e-53
MRPL40P1	10.1115	3.15263	0.203155	15.5184	2.60467e-54	5.85024e-53
RP11-295M3.4	181.523	-2.76266	0.178073	-15.5142	2.78143e-54	6.24408e-53
C1QTNF7	212.51	-2.54455	0.164061	-15.5097	2.98238e-54	6.69183e-53
PCAT6	359.122	1.67375	0.107952	15.5046	3.2286e-54	7.24064e-53
MEN1	3005.73	0.78816	0.0508352	15.5042	3.24873e-54	7.28211e-53
PDCL3	1611.67	0.80166	0.05172	15.5	3.46887e-54	7.77163e-53
LINC00671	4.78357	-2.58111	0.16653	-15.4993	3.5047e-54	7.84796e-53
PLEK2	482.491	1.42078	0.0916805	15.497	3.63223e-54	8.12941e-53
ST3GAL4-AS1	213.481	1.36903	0.0883507	15.4954	3.72587e-54	8.33481e-53
RP11-305L7.6	6.45583	-2.83888	0.183243	-15.4924	3.90452e-54	8.73005e-53
CD200	857.131	-1.25825	0.0812241	-15.4911	3.98503e-54	8.90558e-53
HCG23	9.29304	-2.37559	0.153406	-15.4856	4.33862e-54	9.69089e-53
CTD-2013N24.2	69.8501	-1.04313	0.0673624	-15.4853	4.35728e-54	9.72768e-53
PEX11B	3176.86	0.778924	0.0503061	15.4837	4.47036e-54	9.97407e-53
ADAMTS9-AS1	72.4252	-2.68375	0.173328	-15.4837	4.47213e-54	9.97407e-53
AC092155.4	1.66949	-3.94249	0.254672	-15.4807	4.68672e-54	1.04474e-52
SRL	62.8362	-1.79586	0.116036	-15.4767	4.98069e-54	1.10972e-52
RP11-345M22.2	18.306	-1.97905	0.127891	-15.4745	5.16016e-54	1.14912e-52
MARS	5850.35	0.713502	0.0461242	15.4691	5.60528e-54	1.24762e-52
ERH	6499.22	0.808847	0.0523003	15.4654	5.93748e-54	1.3209e-52
ZDHHC16	2545.06	0.789282	0.0510379	15.4646	6.01344e-54	1.33713e-52
[truncated: 56,389 more rows]
