# Supplementary material for: Identification of key modules and genes associated with breast cancer prognosis using WGCNA and ceRNA network analysis
Source: Aging (Albany NY). 2020 Dec 9;13(2):2519–38. doi: 10.18632/aging.202285 (PMC7880379; doi:10.18632/aging.202285)
Supplement: Supplementary Table 2 [file aging-13-202285-s003.xlsx]

## Sheet: DElncRNA
RP11-54O7.16
RP11-54O7.1
RP11-54O7.3
TTLL10-AS1
RP11-547D24.1
RP11-547D24.3
RP3-395M20.12
LINC00982
RP11-22L13.1
RP5-1092A11.5
LINC00337
RP1-202O8.2
RP13-392I16.1
RP1-69M21.2
RP5-888M10.2
RP11-474O21.5
RP11-91K11.2
RP3-340N1.2
RP11-111I12.1
RP11-84A19.3
RP4-533D7.5
RP1-18D14.7
RP11-466L17.1
RP11-90C4.1
LINC00466
RP11-335E6.3
RP4-694A7.2
RP3-333A15.1
RP4-660H19.1
RP5-1102E8.3
RP4-651E10.4
LINC01140
RP11-148B18.3
RP11-286B14.1
RP4-575N6.4
RP11-153F1.1
RP11-483I13.2
RP5-965F6.2
RP4-663N10.1
RP11-12L8.1
RP11-344P13.6
RP11-495P10.8
RP11-495P10.5
RP11-196G18.3
RP11-98D18.15
RP11-98G7.1
RP1-35C21.2
GS1-120K12.4
RP11-16L9.2
RP11-382E9.1
RP11-480I12.7
RP11-328D5.1
RP1-272L16.1
RP1-28O10.1
KCNH1-IT1
RP11-354K1.2
RP11-122M14.1
RP11-61J19.2
RNU6ATAC35P
RP11-400N13.3
RP4-781K5.4
RP4-781K5.5
RP4-781K5.6
LGALS8-AS1
RP11-561I11.3
RP11-62I21.1
RP11-83A16.1
RP11-36N20.1
AC093390.1
AC019172.2
AC107057.1
AC010729.1
U91324.1
RP11-734K21.5
AC010969.1
RP11-254F7.4
AC062028.1
MYCNOS
AC010745.4
AC016768.1
AC097724.3
AC105398.3
AC016995.3
AC093822.1
AC093609.1
RP11-89K21.1
SIX3-AS1
AC012354.6
AC009236.2
AC106869.2
AC007682.1
AC093110.3
RP11-481J13.1
AC092155.4
AC097495.2
AC105053.3
RP11-1399P15.1
AC068057.1
ST6GAL2-IT1
AC096669.3
AC023672.2
AC019100.3
AC017002.1
RP11-19E11.1
RP11-77A13.1
AC013275.2
RP11-286H15.1
AC018804.3
AC011893.3
AC078882.1
AC092484.1
AC009227.2
AC061961.2
AC074363.1
AC012594.1
AC007405.8
RAPGEF4-AS1
RP11-796E10.1
AC106900.6
AC018890.6
AC079613.1
AC098617.1
RP11-105N14.3
AC012462.2
AC093850.2
AC114803.3
AC097713.3
AC114814.4
AGAP1-IT1
AC011286.1
AC112721.2
AC011298.2
BOK-AS1
AC114730.5
AC114730.3
AC093642.3
CHL1-AS1
AC090044.2
SRGAP3-AS2
RP11-767C1.1
RP11-536I6.2
AC099754.1
AC114877.3
AC098973.2
RBMS3-AS3
AC116035.1
RP11-1024P17.1
AC018359.1
AC123023.1
RP11-157F20.3
SYNPR-AS1
RP11-14D22.1
ADAMTS9-AS1
ADAMTS9-AS2
RP11-654C22.2
PDZRN3-AS1
RP11-354H21.1
RP11-221J22.2
LINC00636
RP11-615J4.3
LSAMP-AS1
ALDH1L1-AS2
RP11-71E19.1
RP11-71E19.2
RP11-93K22.6
RP11-375I20.6
RP11-372E1.4
RP11-501O2.5
RP11-680B3.2
RP11-167H9.4
CLRN1-AS1
RP11-166N6.2
RP11-373I8.1
RP11-454C18.1
RP11-439C8.2
MME-AS1
KCNAB1-AS1
RP11-298O21.6
RP11-298O21.3
RP11-298O21.2
RP11-368I23.2
RP11-368I23.3
RP11-368I23.4
RP11-373E16.3
RP11-644C3.1
LINC00578
RP11-114M1.2
RP11-114M1.1
LINC01014
PEX5L-AS1
EIF2B5-IT1
ADIPOQ-AS1
RP11-135A1.3
AC124944.5
RP11-503N18.1
RP11-503N18.4
RP11-586D19.1
RP11-1406H17.1
AFAP1-AS1
RP11-338K13.1
RP11-774O3.1
LINC01096
RP11-3J1.1
RP11-608O21.1
RP11-415C15.1
RP11-415C15.3
RP11-734I18.1
RP11-103J17.2
RP11-328N19.1
RP11-345F18.1
RP11-319E12.1
RP11-319E12.2
RP11-25H12.1
LINC01088
LINC00989
RP11-234K19.1
RP11-529H2.1
RP11-742B18.1
RP11-431J17.1
RP11-713M6.2
RP11-269F21.3
AC113617.1
IL21-AS1
RP11-381N20.2
RP11-519M16.1
RP11-314N14.1
RP11-138I17.1
RP11-714L20.1
RP11-563M4.1
RP11-1336O20.2
RP11-92A5.2
RP11-364P22.1
AC005150.1
RP11-6E9.4
RP11-789C1.1
RP11-789C1.2
RP11-322J23.1
RP11-717H13.1
RP11-475B2.1
AC108142.1
RP11-386B13.4
RP11-217E13.1
RP11-696F12.1
RP11-756P10.2
CTD-2083E4.7
CTD-2008N3.1
RP11-445O3.1
CTD-2143L24.1
RP11-308B16.2
RP1-137K24.1
CTD-2139B15.5
RP11-774D14.1
CTD-2118P12.1
RP11-113I22.1
CTD-2263F21.1
CTD-2078B5.2
LINC00603
RP11-473L15.3
RP11-503D12.1
RP11-53O19.1
RP11-53O19.2
CTD-2013M15.1
CTD-2023N9.1
CTD-2023N9.2
CTD-2023N9.3
RP11-772C9.1
CTD-2116N20.1
RP11-83M16.5
RP11-136K7.2
CTD-2015A6.2
CTC-480C2.1
LINC00461
CTC-467M3.1
MEF2C-AS1
AC113167.1
AC113167.2
RP11-213H15.1
CTC-529L17.2
RP11-138J23.1
RP11-6N13.1
CTC-551A13.1
LINC00992
CTD-2280E9.1
RP11-166A12.1
RP11-257I8.2
RP11-508M8.1
RP11-756H20.1
ADAMTS19-AS1
CTB-49A3.4
AC009014.3
CTB-35F21.4
CTC-255N20.1
RP11-44B19.1
MIR143HG
RP11-32D16.1
RP11-175K6.1
CTD-2270F17.1
CTB-43E15.2
RP11-619L12.4
CTD-2532K18.2
RP11-91H12.4
RP11-274H24.1
LINC00518
RP1-86C11.7
XXbac-BPG27H4.8
HCG23
RP3-468B3.2
RP3-340B19.3
RP1-207H1.3
RP11-61I13.3
TDRG1
RP1-261G23.5
RP1-302G2.5
RP11-795J1.1
RP3-525N10.2
KCNQ5-IT1
RP1-45N11.1
RP1-60O19.1
RP1-142L7.5
RP11-346D19.1
RP11-735G4.1
RP11-95M15.1
RP11-10J5.1
RP11-12A2.3
RP11-440G9.1
RP11-350J20.12
RP3-443C4.2
SYNE1-AS1
RP11-13P5.2
FNDC1-IT1
RP11-235G24.1
RP11-235G24.3
RP5-826L7.1
RP11-300M24.1
RP4-655C5.4
RP11-351J23.1
RP11-503C24.2
RP11-503C24.6
RP3-495K2.2
RP11-417E7.2
RP5-894D12.5
XX-C2158C6.3
AC093627.7
AC093627.8
AC226118.1
AC147651.1
RBAKDN
AC007128.1
RP4-594A5.1
AC004160.4
AC005550.5
AC019117.1
AC019117.2
AC017060.1
AC003986.6
AC073072.5
AC083864.3
POU6F2-AS2
AC011738.4
AC073325.1
RP5-1185I7.1
AC002383.2
AC002451.3
NFE4
RP5-884M6.1
AC073130.3
AC002066.1
AC006159.5
AC006159.4
RP11-560I19.1
FEZF1-AS1
RP11-3B12.5
RP11-738B7.1
RP11-2E11.5
AC011625.1
RP5-912I13.1
RP5-1121A15.3
MNX1-AS2
MNX1-AS1
AC011899.10
LINC01022
PHEX-AS1
AL121578.2
RP13-43E11.1
AC092198.1
RP3-326I13.1
NDP-AS1
GS1-421I3.2
RP4-755D9.1
LINC00086
FGF13-AS1
AF003625.3
RP11-366F6.2
CSAG3
CSAG2
AF067845.1
RP11-378A12.1
CTD-3023L14.1
CTD-3023L14.2
RP11-10A14.5
AC100802.3
RP11-597M17.1
RP11-486M23.2
AC145110.1
RBPMS-AS1
RP11-317N12.1
RP11-431M3.1
RP11-150O12.1
RP11-150O12.3
RP11-44K6.4
CTA-392C11.1
RP11-301G7.1
RP11-930P14.1
RP11-10H3.1
RP11-17A4.2
LINC00968
RP11-17A4.3
RP11-513O17.2
RP11-246K15.1
CTD-2339F6.1
RP11-32K4.1
RP11-865I6.2
RP11-600K15.1
RP11-159H10.3
RP11-434I12.3
CASC9
RP11-92K15.3
RP11-92K15.1
CTA-392E5.1
RP11-100L22.1
RP11-320N21.2
RP11-402L5.1
KB-173C10.2
RP11-1C8.7
RP11-1C8.4
RP11-1101K5.1
RP11-58O3.2
LINC00536
RP11-654G14.1
RP11-539E17.5
FAM83A-AS1
FER1L6-AS2
RP11-383J24.1
HPYR1
RP11-157E21.1
RP11-30J20.1
RP11-909N17.2
RP11-661A12.9
RP11-429J17.5
FAM83H-AS1
RP11-429J17.7
GS1-393G12.14
RP11-109M17.2
CDKN2B-AS1
RP11-149I2.4
LINC00032
RP11-311H10.4
RP11-384P7.7
CNTFR-AS1
RP11-327L3.3
RP11-381O7.3
PGM5-AS1
RP11-88I18.3
RP11-470P21.2
RP11-276H19.1
XXyac-YM21GA2.7
RP11-305L7.6
RP11-308N19.1
RP11-284G10.1
RP11-145E17.2
RP11-447M12.2
LINC00200
RP11-398B16.2
RP11-298E9.5
RP11-464C19.3
RP13-463N16.6
GATA3-AS1
RP11-379F12.4
RP11-379F12.3
RP11-428L9.1
RP11-428L9.2
RP1-251M9.2
RP11-397O4.1
ST8SIA6-AS1
RP11-128B16.3
RP13-16H11.2
RP11-810B23.1
RP11-322I2.1
RP11-124O11.1
LINC00844
RP11-174J11.1
RP11-222G7.2
LINC00595
LINC00858
ACTA2-AS1
RP11-34A14.3
RP11-108L7.15
LBX1-AS1
RP11-107I14.2
RP11-190J1.3
KCNIP2-AS1
RP11-416N2.3
RP11-127O4.3
RP11-127O4.2
RP11-498B4.5
EMX2OS
AC025016.1
RP11-35J10.5
RP11-35J10.4
RP11-494M8.4
RP11-51B23.3
RP11-396O20.2
RP11-405K6.1
RP11-20J1.1
CTD-2507G9.1
RP11-159H22.2
RP11-215H22.1
WT1-AS
AC068858.1
CTD-2589M5.4
RP11-881M11.4
RP11-881M11.8
RP11-554A11.4
RP11-554A11.5
AP000439.3
RP11-626H12.1
RP11-939C17.4
CTD-2530H12.2
RP11-535A19.1
CTD-2337I7.1
RP11-686G23.2
RP11-179A16.1
RP11-736K20.5
RP11-347E10.1
RP11-64D24.2
RP11-831A10.2
RP11-831A10.1
RP11-702B10.2
AP002856.7
RP11-598F7.4
LINC00940
RP11-476M19.2
RP11-429A20.3
RP11-429A20.4
RP11-1038A11.1
RP11-20D14.6
RP11-871F6.3
RP11-361I14.2
RP11-153K16.1
RP11-662I13.2
RP11-977P2.1
RP11-310I24.1
RP11-551L14.6
RP11-115F18.1
RP11-118A3.1
RP11-493L12.5
RP1-228P16.3
RP11-607P23.1
HOTAIR
HOXC-AS3
RP11-767I20.1
RP11-542B15.1
RP11-81H3.2
RP11-390N6.1
RP11-315E17.1
RP11-408B11.2
RP11-248E9.6
RP11-13A1.3
RP11-341G23.3
RP4-809F18.2
RP4-809F18.1
RP5-944M2.3
RP11-474D1.3
RP11-417L19.2
SACS-AS1
LINC00445
RP11-172E9.2
LINC01050
LINC00371
LINC00355
LINC00383
ATXN8OS
LINC00393
LINC00392
RP11-471M2.3
FGF14-AS2
LINC00460
ARHGEF7-AS2
ARHGEF7-IT1
ARHGEF7-AS1
LINC01070
LINC01043
LINC01044
CTD-2314B22.1
AL161668.5
NOVA1-AS1
RP11-626P14.2
LINC00645
CTD-2591A6.2
RP11-1103G16.1
CTD-2298J14.2
LINC00640
RP11-255G12.2
RP11-930O11.2
RP6-114E22.1
RP3-514A23.2
RP11-488C13.4
RP11-7F17.3
RP11-299L17.3
RP11-356K23.1
CTD-3035D6.2
RP11-349I1.2
RP11-1070N10.5
RP11-1070N10.7
RP11-164H13.1
LINC00524
RP11-661D19.3
RP11-731F5.1
RP11-731F5.2
LINC00221
PWRN1
RP11-1084I9.1
RP11-578F21.6
RP11-489D6.2
RP11-463I20.2
RP11-624L4.1
RP11-62C7.2
RP11-265N7.2
RP11-265N7.1
RP11-462P6.1
RP11-27M9.1
RP11-108K3.1
RP11-108K3.2
CTD-2330J20.2
RP11-299H22.6
RP11-798K3.2
RP11-19J5.2
LINC00593
RP11-138H8.6
RP11-210M15.1
RP11-379K22.2
RP11-379K22.3
RP11-158M2.3
LINC00052
RP11-343B18.2
RP11-661P17.1
RP11-763K15.1
LINC00924
CTD-2147F2.1
CTD-2147F2.2
RP11-6O2.4
RP11-6O2.3
RP11-66B24.1
LA16c-381G6.1
RP11-616M22.1
RP11-616M22.2
PRSS29P
RP11-616M22.7
LA16c-312E8.2
LA16c-329F2.1
RP11-304L19.12
LA16c-380H5.3
LA16c-380H5.4
LA16c-380H5.2
AJ003147.8
AJ003147.9
RP11-127I20.5
CTD-2535I10.1
RP11-485G7.6
BCAR4
U91319.1
CTD-2135D7.5
RP11-65J21.1
RP11-65J21.4
CTA-363E6.2
CTD-2194A8.2
AC002331.1
RP11-673P17.4
RP11-57A19.2
CDIPT-AS1
RP11-120K18.2
RP11-14K3.7
RP11-21B23.2
CASC16
RP11-297L17.2
RP11-26L20.4
LINC00922
RP11-513N24.1
RP11-281J9.2
RP11-467I17.1
RP11-525K10.1
RP11-543N12.1
RP11-486L19.2
LINC01082
RP4-536B24.4
RP11-863P13.6
RP11-863P13.3
CTD-2555A7.2
AC135178.7
CTC-297N7.9
RP11-963H4.3
RP11-628O18.1
LINC00670
AC005863.1
SMCR2
RP11-1109M24.5
RP11-260A9.6
RP11-218F4.1
CTD-2008P7.8
CTD-2008P7.1
RP11-321A17.4
RP11-68I3.7
RP11-354P11.4
RP11-354P11.2
RP11-31I22.3
AC015849.16
RP11-445F12.1
RP5-1028K7.2
LINC00671
HOXB-AS3
HOXB-AS4
RP11-357H14.17
CTD-2377D24.6
PRAC2
RP5-875H18.4
CTD-2510F5.4
CTD-2319I12.5
RP11-855A2.5
ABCA9-AS1
RP1-193H18.3
AC002539.1
LINC01028
KCNJ2-AS1
RP11-238F2.1
LINC01152
LINC00511
RP11-1124B17.1
RP11-57A1.1
CTD-3010D24.3
RP11-806H10.4
RP11-559N14.5
RP11-353N14.1
RP11-353N14.4
CTD-2529O21.1
CTD-2047H16.2
AC139099.4
RP11-476K15.1
CTD-2015H3.1
RP11-161I6.2
CTD-3096M3.2
LINC00668
RP11-674N23.4
RP11-419J16.1
RP11-883A18.3
RP11-64C12.8
RP11-53B2.4
CXADRP3
RP11-1157N2__B.2
RP11-527H14.6
RP11-527H14.4
RP11-958F21.1
RP11-57J16.1
AC015933.2
RP11-110H1.8
CTD-2171N6.1
RP11-397A16.1
RP11-693L9.2
RP11-108P20.4
RP11-146N18.1
RP11-775G23.1
RP11-25L3.3
AC034110.1
RP11-849I19.1
RP11-567M16.2
CASC20
RP5-839B4.8
RP5-1002M8.4
RP11-218C14.5
FAM83C-AS1
RP5-881L22.5
RP11-465L10.10
RP4-530I15.6
RP11-80K6.2
RP11-93B14.4
LINC00659
HAR1B
LINC00176
AC009005.2
AC004490.1
AC005624.2
MIR7-3HG
TINCR
CTD-3193O13.8
CTD-2265O21.3
MIR24-2
CTC-548K16.1
CTD-2521M24.11
CTB-92J24.3
AC011524.1
AC008991.1
LINC00906
CTD-2540B15.6
CTD-2540B15.12
AC002398.12
AC092071.1
AC006262.10
AC007193.10
CTB-60B18.18
CTB-147C22.8
CTD-2620I22.3
CTD-2587H24.5
LA16c-83F12.6
AC005301.8
AC000067.1
XXbac-B33L19.4
FAM230C
KB-1440D3.13
CTA-407F11.8
CTA-992D9.7
CTA-929C8.5
RP1-302D9.1
RP1-293L6.1
CITF22-24E5.1
RP5-1170K4.7
CTA-126B4.7
Z82214.3
RP4-754E20__A.5
CTA-941F9.9
WI2-85898F10.1
CITF22-49D8.1
LINC00898
RP11-191L9.4
RP13-455A7.1
CTA-384D8.35
CTA-384D8.34
CTA-384D8.31
AP003900.6
AP001465.5
AF127577.8
AP000473.8
AL109763.2
AP001601.2
LINC00113
AP000251.3
HUNK-AS1
AF015262.2
AP000696.2
AP000697.6
AP001434.2
DSCAM-AS1
AP001627.1
AP001628.7
AP001631.9

## Sheet: DElncRNA_target
FEZF1
MIR199A1
MCRIP2
NFATC2
DEPDC7
AMDHD1
CRNN
ABCB1
RPTN
CAV1
FA2H
CCND1
PDCD4
HNRNPA2B1
KIR2DL3
CEMIP
CSF2RB
ABCC1
MIR218-1
SLC46A2
CDK4
ADIPOR1
VSIG10L
SNAI2
GNA14
LMTK3
TINCR
COL22A1
CDH2
KRT10
LY96
FNIP2
MIR34A
EPS8
KRT1
PLXDC2
FASN
SOX2
FHDC1
CD82
PTGER3
FABP4
CDKN1A
TNFRSF10B
ITGAM
MXRA5
AR
SMAD7
MSMB
TMEM258
QKI
MIR331
NDUFAF4
KRT2
LOC283070
TP53
KLF2
MMP2
RRM2B
UPK1A
TGFB1
SIRT1
MIR148A
BCS1L
MIR107
IL1F10
FRY
LAMC2
EDDM13
NPM3
PDZK1IP1
ABCC2
COTL1
VIM
EPCAM
CAMK1D
CACNA1C
OASL
ZBTB7C
EMX2
MRGPRX3
GPRIN2
PGLYRP3
PTEN
ACER1
NUPR1
KRT4
CDKN2B
MIR20A
PARP1
DNMT1
NMNAT2
SPTSSB
MMP1
MIR375
CD36
ARL5A
MIR122
CTH
ACOT4
ANGPT2
TM7SF3
ECI1
ADORA2B
PRC2
LAMB3
FAS
SLC6A14
ERBB2
ZNF662
CCL27
MAPK8
TBC1D24
KANK4
PITX1
E7
ARID4A
VEGFA
MMP9
CPM
LINC00113
MYH14
MIR149
F12
MIR452
CRYAB
RBM38
RB1
ELF5
RHOU
AADACL2
RDH12
WFDC21P
SMAD2
MIR765
GCNT3
MIR126
NANOG
EPB41L3
CCDC3
CARD8
NDRG4
MIR181A1
CASP9
RUNX3
MIR93
ALDOC
TJP1
HYAL4
C5orf46
ASNS
NEFM
SNAI1
PLA2G2F
MIR4443
MIR148B
MIR143
PADI1
PM20D2
MIR613
KRT9
TWIST1
HOXA5
PLBD1
AFAP1
ITPKB
PALD1
MMP3
PTPN21
SORT1
SLC39A2
VAMP3
CDH1
MIR454
MIR17
MCM3AP-AS1
NTRK3
GPX2
KRT19
MIR373
DLX5
PYDC1
HIF1A
FAM216A
CDKN2A
FLVCR1
CYP4F22
ADAMTS5
MIR125A
LYNX1
MIR23B
DSC1
MIR217
IL22RA1
ZEB1
NEB
BAX
NUF2
HOMER2
FETUB
MSX2
LIPH
FGD2
TGM5
EZH2
CCNE1
MIR15B
KCNE1
MIR29B1
TIPIN
TGFBI
KCTD11
MYRFL
SETD2
MIRLET7A1
AKT1
BCL2
ELOVL4
MIR326
LOC153684
SFTA2
CASP3
CRISPLD2
GLI2
MIR544A
FARP2
GPAT3
COL5A1
NDUFA4L2
SMKR1
MYC
NES
KDM1A
WIF1
SMIM5
HuR
KRT77

## Sheet: DEmRNA
Supplementary Table 2. Differential lncRNA and its target genes.
gene symbol
MMP11
MYOM1
NEK2
GPAM
COL10A1
FHL1
TNS1
COL11A1
PKMYT1
KIF4A
LYVE1
PPAPDC1A
KLB
SORBS1
SIK2
HSPB7
KIAA0101
CAV1
IQGAP3
NPR1
SLC2A4
KCNIP2
RDH5
UBE2C
GYG2
ASF1B
AOC3
TPX2
ACVR1C
IBSP
CDC25C
NUF2
UHRF1
AQPEP
UBE2T
HSD17B6
CLEC3B
SPC25
GSN
HJURP
KLHL31
CRHBP
SPTBN1
NUSAP1
NIPSNAP3B
CFL2
RP11-175K6.2
ACACB
TROAP
MMP13
CDK1
CKAP2L
ACSM5
NAALAD2
PLK1
CAT
DTL
PYGM
RP11-644F5.10
RP11-736K20.4
CEP55
KIF20A
PBK
ITIH5
INHBA
LIPE
CENPF
BUB1
MMD
EBF1
MELK
WDR62
KIF18B
SLC24A2
KIFC1
CAV2
SPC24
WISP1
HSD17B13
PDE2A
HMMR
FAM13A
SYNE3
LPL
DLGAP5
PTTG1
PAFAH1B3
SLC16A7
CCNB1
ITGA7
RRM2
CKS2
ACO1
ASPM
CDKN3
NEIL3
EXO1
CST1
C16orf59
AURKA
ZWINT
MTURN
KIF2C
BUB1B
FZD4
BTNL9
HBB
PPARG
SH3D19
GPR146
SKA1
GABRD
HSPB6
TK1
SGOL1
PPP1R12B
ANLN
NDC80
COMP
CCDC64
CDCA8
ARHGAP20
GJB2
PALMD
CDCA5
PAMR1
FOXM1
SKA3
NCAPG
CDC20
MMP1
BIRC5
FIGF
KIF14
CCNB2
TOP2A
ABCD2
FAM83D
GTSE1
POC1A
ASPA
RP11-427J23.1
PYCR1
ERCC6L
GPRIN1
PAQR4
CASC5
CDCA3
ADAMTS5
MOCS1
KIF23
TNXB
KIF11
GPBAR1
LMNB1
HAGHL
SPAG5
NUAK2
PRC1
CD34
TMEM37
EPYC
RMI2
CCDC69
AURKB
RAD51
DMGDH
MKI67
IGFBP6
CCL11
PDE3B
MYBL2
GPX3
NCAPH
CENPM
SDPR
DEPDC1B
SVEP1
GINS1
KLHL33
TACC3
LRRC15
LEPR
CILP2
KIAA0408
DDR2
ESPL1
RECQL4
LINC01537
GRM4
CCNA2
AOC4P
DEPDC1
CENPA
LDB2
RP11-941H19.2
MYZAP
NKAPL
RPLP0P2
EZH2
ABCA9
MCAM
ANKRD53
EPB42
E2F8
OIP5
ESM1
ALPK3
FXYD1
APOB
2020-03-01
ANGPT4
PLAC1
ESCO2
ALDH1L1
CENPU
PFKFB1
HCAR2
ADAMTS14
CDC45
PLIN1
MTFR2
GPD1
CNIH2
AQP7
PLIN4
CCDC3
GNG11
FAM64A
HMGB3P10
RAD54L
TMEM220
NMUR1
HIST1H3H
SLC19A3
C1QTNF6
ACSL1
E2F1
GLYAT
CTXN1
CENPE
SEMA3G
SHCBP1
SLC17A7
MAGI2-AS3
C1QTNF9
GHR
UBE2S
CLEC5A
PLXNA4
EBF3
MAP1LC3C
FRMD1
LRRN4CL
AQP7P1
DPT
KIF15
TTK
CHRDL1
TGFBR2
LMOD1
OXTR
MCM10
RDM1
CLSPN
CXorf36
POLQ
MYOC
CST4
BHMT2
C6orf99
KIF26B
SCN4A
STARD9
GNAI1
CDO1
SCARA5
CST2
ABCA10
FAM47E-STBD1
PDK4
GALNT15
BGN
DST
ADRA1A
CLMP
KLF15
PITX1
TXNIP
PLSCR4
CD36
HBA2
TRIP13
CCDC78
RP11-424C20.2
FN1
LEP
LHFP
SCT
SPRY2
ECM2
GPIHBP1
G0S2
RP11-407P15.2
ADRB2
RBP4
TIMP4
CD300LG
CTHRC1
ABCA8
DOCK11
LIFR
EME1
PACSIN1
FAM111B
HMGB3
KIF18A
CPED1
ADH1A
AKAP12
PDZD2
E2F7
CHRNA6
RAB26
KREMEN2
PCOLCE2
TYRO3
HN1
KLF4
RP3-414A15.12
LINC01561
TDO2
MAD2L1
HIST1H2AI
KPNA2
SPX
HEPACAM
CDCA2
GNG13
SHE
TRHDE-AS1
GNG2
SLC35G2
ATOH8
CORO2B
GOLGA8M
SGK2
TLCD1
SBK1
SLC7A10
VWF
CABP1
S100P
CDC6
MND1
ARHGAP11A
LGI4
DTX1
OR2B6
DGAT2
AIM1L
ABCA6
SLIT3
SALL4
ANXA1
PLAC9
RP11-823E8.3
CNN1
DMD
LRRC2
RBMS3
JAM2
RP11-679B19.1
P4HA3
SRPX
F10
TBX15
F12
CASQ2
HES6
FABP4
RP11-481H12.1
TNNT1
ANGPTL1
TONSL
MAMDC2
HIST1H2AM
ABCC9
TMEM246
HIST1H2BD
TPRN
ENPP2
CENPI
HAPLN1
MME
RAD51AP1
GPLD1
CEBPA
ATP1A2
LAMP5
FAM228A
PRKAR2B
BMP8A
ORC6
CEMIP
SCN4B
MLXIPL
STIL
TFR2
ALDH2
SQLE
SYNGR3
CIDEC
GYS2
CDT1
CCNE2
PEAR1
RHPN1
DEFB132
LGALS12
VGF
NNAT
HCN2
CDH20
RNFT2
GRM8
MFAP2
ADAM8
TMEM132C
CXCL11
EGFEM1P
GIPC2
CA4
E2F2
ANGPTL5
ZNF695
PKHD1L1
CES1
RP11-116B13.1
HID1-AS1
ISG15
PROC
PDLIM3
RP11-394O4.5
MRAS
DENND2A
GSTM5
KLHL29
OXCT1-AS1
FBXO43
MICU3
ARTN
AUNIP
FOXD3-AS1
MYT1
HIST1H2BO
CGA
MESTIT1
MISP
STX11
WBSCR28
FAM180B
IL17D
ALDH1A1
CXCL10
ACTL8
FAM149A
RIPPLY3
PRR11
GNAL
PREX2
GGTA1P
CFAP45
MATN3
PGM5P4
LEF1-AS1
GINS2
ANK2
PRRT4
HTR1D
C19orf80
S1PR1
EBF2
ADH1B
CACHD1
PID1
MGLL
FAM13C
AL035610.1
LILRB5
RTKN2
NAT8L
BMX
MYH11
SDS
LINC01230
TSPAN7
ESR2
AQP1
DIAPH3
DQX1
FHL5
FAM72D
FAM162B
METTL11B
FAM72A
GPRASP1
CDC20B
CLIC5
PALM2-AKAP2
SAPCD2
MYLK
TYMS
HIST1H3D
ITPKA
KL
ORC1
SOX17
MUC2
SYNPO2
RTBDN
CDKN1C
IL4I1
PPP1R1A
MRAP
PGM5P3-AS1
TCEAL7
SYT13
SCTR
MAB21L1
HNRNPA1P21
LRRC70
HSPB2
MAOA
COL6A6
EDNRB
PGM5P4-AS1
CETP
BRIP1
TMEM132A
LINC01485
TMEM145
OLR1
ADM2
APOLD1
ADIPOQ
FGF1
TMEM255A
IL21R
ANGPT1
MGARP
TRHDE
ITPRIPL1
ADD3-AS1
ALAS2
NKAIN1
HIST1H2BH
CCL14
SPATA20P1
COX6C
CA3
2020-03-04
FFAR4
CCDC178
CKMT2
SAMD5
COX7A1
FREM1
TNFRSF18
CCDC36
TMEM220-AS1
TSLP
LHX2
CPA1
FMO2
MMRN1
C9orf172
PQLC2L
RP11-703I16.3
ERICH4
NRN1
C10orf10
CAMP
CBLN2
C5orf66-AS1
CEACAM5
FP325317.1
KISS1R
PRR36
PRAME
SYNDIG1
CIDEA
ALDH1A2
FOXP3
CCDC141
AVPR2
FAM89A
CTD-2033D24.2
RP11-64C12.1
AGAP11
CEACAM6
CAMK2N2
LRTM2
CSAG1
HIST1H2AD
RNF150
WASF3
TUSC5
PER1
HIF3A
APCDD1
MAPK8IP2
C14orf180
TSHZ2
GPRC5A
RP11-480I12.5
SLC16A3
EGR1
HIST1H2BK
FAM196B
CDC25A
SLC29A4
HLF
MEOX2-AS1
MASP1
LINC00377
STAB2
GAL3ST2
CXCL2
HIST1H2BE
BCAS4
GSG2
TRPA1
HNRNPA1P57
RP11-96C23.13
NDRG2
NR3C2
KIFC2
MRGPRF-AS1
ACAN
PCK1
CPM
RP1-63M2.7
WT1
HOXA4
RP4-616B8.5
HIST1H4I
KY
TRPM3
CLPSL2
TIGD3
PRRG3
C2orf48
KIAA1211
INMT
CASP14
MEOX2
C8orf88
HSH2D
AOC2
TNFRSF9
HAS3
ZNF300P1
SYNM
AQP7P2
HOXC11
PGM5
MIR100HG
KIT
HNRNPA1P66
GPR133
ADAM33
C3orf67
RHBDL1
RNU5B-3P
CHL1
ADCYAP1R1
TMEM252
LINC01366
CNTNAP2
EPN3
C9orf116
HIST3H2BB
S100A14
ATP1A3
MTL5
HOXC13
AP000892.6
CREB3L1
TWIST2
PIF1
DMRT2
MATN2
ZFP36
CLDN5
IFI6
ABCB5
AKR1C1
CNTD2
HIST2H4A
HIST1H3J
HMP19
AKAP6
PDE1C
MEDAG
RAMP1
SCN9A
HIST1H1PS1
CELSR3
TMOD1
NEURL1
FAM72B
CD209
LMO7DN
FBN2
HSD52
KCNMB1
METRN
TRDN
FOXJ1
CCR8
HCAR3
HSPB2-C11orf52
DRP2
SMIM22
NKX3-2
IGF1
P2RY12
ADAMTS1
PRG4
CD80
CCNE1
COL1A1
ITM2A
TMEM100
CYSRT1
B3GALT1
SLCO1C1
CREB5
MS4A15
MYOM2
SPDYC
TLX1
MYLK2
RYR3
RSPO3
FOSB
SLC22A3
MMP10
ISM1
RP5-875H18.10
SMYD1
RXRG
RHOXF1
AC034236.2
IGFL3
CSRNP3
JAKMIP1
UTS2B
CASP12
ILDR2
CAPN11
USP44
SLC7A5
CFD
SRMS
RP11-399C16.3
TICRR
RBP7
SEL1L2
KLHL4
ODF3L1
LEF1
RP1-34B20.4
KLK4
HPD
GPR19
DNASE1L2
DNASE1L3
FGF2
HIST1H2BC
HOXB13
CBX2
PDE11A
SYNGR4
ATP2A1-AS1
NPW
POSTN
CLDN11
TYMSOS
LA16c-380H5.1
PTK6
AP004782.1
XPNPEP2
MIR4653
SOGA3
bP-2189O9.2
RP11-213O5.4
RP11-56D16.8
RP11-863K10.7
BMPR1B
PAK3
AC112721.1
CHRNA9
PVALB
DPEP1
HORMAD2-AS1
IGFL2
MRGPRF
MUC1
COL22A1
HIST1H4D
RIIAD1
MFAP4
RP11-442O1.3
HOXA5
FAM110D
KLHL13
TGFBR3
STARD10
EGR2
CA9
TMC2
TUBB3
ADAMDEC1
HBA1
SPOCD1
S100A7
TMEM92
HIST1H2BJ
ULBP1
ABCB1
ATP5G1P4
IL17REL
ZMYND10
SYN2
GBX2
AL928761.1
KLHL30
PPP2R2C
UBE2SP1
LINC01344
APOBEC3B
FAM196A
AKR1C3
RPL21P135
ANKRD22
RP11-1070N10.3
CX3CL1
PAX7
ABCC13
HIST1H2BF
ADH4
RP11-236L14.2
CTD-2224J9.8
CXCL9
RP5-963E22.6
LHCGR
LINC01522
VIP
IGSF10
SCN11A
CAPSL
ORM1
CIB3
FOS
LINC01474
AC015849.15
EEF1A2
HIST2H2BC
TNMD
KCNJ3
MIR143
CTD-2536I1.2
GPR182
CDKN2A
FAM57B
NMU
LINC01586
IL33
SCN3A
RP11-203I2.1
HIST1H3B
KIF1A
LINGO1
LA16c-312E8.4
CAPS
LGALS17A
LRRC46
NAT1
CFB
GRIN2D
CNTNAP3B
ASCL1
HIST1H4E
CST5
ERMN
RASSF9
MEOX1
DUSP1
CYP2B7P
UNC13A
IGHE
PSAT1P3
HIST2H2BE
VIT
RP4-673D20.3
RP3-323A16.1
SYT5
SMKR1
TMEM178A
MAPK15
LRRC73
PENK
DNAAF3
GLP2R
SLC30A8
PI16
LHFPL5
ADH1C
ANGPTL7
ANKRD29
XIRP1
DMBX1
OASL
TGFBR3L
AC073850.6
TRBV26OR9-2
LRFN2
ENTHD1
INSM1
PP14571
HIST2H2BF
SCN2B
DEGS2
LRRC3B
KCNE1
PTGIS
HIST1H4H
TNNI3
CPNE7
TPSP2
RP11-20J15.5
C2orf54
GLRA4
KCNF1
SPEF1
RP11-386I14.2
AF001548.3
KLKP1
CAPN9
LYPD1
RPS4XP5
SCX
AMZ1
PPP1R14A
RP11-524N5.1
RDH16
VSTM2A
PYDC1
CRABP2
TNNT3
WDR86
LINC01281
MMP27
SCUBE3
WDR86-AS1
C2orf88
RET
ARMC3
DSC1
RP11-236F9.2
MRPL40P1
RP11-295M3.4
C1QTNF7
SAA1
OACYLP
NELL2
RP11-320N21.1
OTX1
SLC22A12
PRR15
MYH1
IGHG1
AC129778.2
SOD3
HPSE2
MROH6
TACR1
CYP26B1
KCNA2
JPH2
TMTC1
FAM72C
HIST2H2AC
RP11-490N5.3
CMA1
ETV7
IL19
LINC01402
CSMD2
PCSK1
KCNJ10
SLC44A4
RP11-81K2.2
TYRP1
COL25A1
HIST1H1C
ZBTB16
MGC50722
HPN
PKDCC
EMX1
SAA2-SAA4
CRB2
RP11-459E5.1
AC018816.3
LPPR5
CHL1-AS2
GABRQ
FOXH1
BMP3
IQSEC3
MYBL1
SAMD11
MIR23A
HOXC10
MMP9
SLC6A4
EDN2
SCN5A
MSLN
RHBG
CXCR2P1
ASCL2
AC004538.3
CRYAB
CD177
LINC01224
KCNK15
LINC00634
ABI3BP
RNU6ATAC18P
FABP6
PAPPA2
TEX19
KCNG3
CTA-315H11.2
UMODL1
KCNH1
ELAVL2
WFDC21P
CLGN
LMO7DN-IT1
CXorf22
FAM107A
KCNB1
PTH1R
RP11-113K21.2
GBP5
DIO1
LINC01429
MEX3A
C19orf33
HIST1H4K
DUSP13
TMEM151A
HSD11B1
GPR17
TMEM215
MNX1
AMH
HOXC12
LOC100421166
AL122127.2
CLDN19
IGFALS
TUBA3D
HHIPL2
SPP1
OVCH2
GXYLT1P6
FGD3
HTR2A
LRRTM2
FCRLB
TLX1NB
GDF10
MTHFD2P1
SRPK3
LINC01497
ARNT2
CTC-276P9.4
IGF2BP1
ATF3
PARD6B
CELF3
AC011239.2
CH17-125A10.2
RP1-278D1.2
APLP1
PHYHIP
MAGEA1
HIST1H3G
C11orf87
NWD2
PTGES3P2
NT5DC4
IGHG4
ENTPD8
BRSK2
MSLNL
FBXL16
CLPSL1
STON1-GTF2A1L
RP11-1136G4.2
ORM2
NOTUM
RIMS4
GRIA4
IL6
FAM189A2
CH17-472G23.1
MIEN1
NTRK2
CST6
RUNDC3A-AS1
SLC7A11
DACT2
P2RX6
ACADL
SCN3B
EPHA8
CLDN9
KLHL38
FGFR3
MAPK10
HAGLROS
DLGAP2
EPHB1
BMP2
HIST1H2BL
CHST6
HIST1H4J
GPC3
RP11-35J10.7
RP11-288G3.4
GPR115
IGHG3
2020-03-10
CACNG1
AC005682.5
C6orf58
CYP1A1
PNCK
CH507-396I9.6
OR2W6P
CTD-3001H11.2
PRELP
TP63
PAK7
TERT
F7
FSIP1
HOXA2
TAS1R3
NKX6-1
PROX1
ACSM2B
CADM3-AS1
RP11-616M22.11
FCRL4
HIST1H2AL
RP11-643A5.3
ENAM
OPRD1
SLC25A24P1
HOXA6
C4orf48
DNM1P47
KCNE4
AOX1
SLC16A6
GRIN2B
RP5-827E24.1
ONECUT2
HIST1H1D
HIST1H2AJ
IL20
KRT37
MYOCD
LY6H
RP11-715H19.2
HMCN2
MT1M
HOXB9
URAD
SERTM1
CLDN6
ACTBP12
CCDC151
RCOR2
RGS6
TSPAN1
BPIFB1
GDF15
HIST1H2BG
TCEAL6
C6
CACNG4
CADPS
TMEM190
RELN
AC025627.7
LRRN3
SIM2
SOX11
NKX2-2
GUCY1B2
NXNL1
AOC1
HIST1H1B
CNKSR2
MAFA-AS1
PTENP1-AS
TP53AIP1
HIST1H3C
TCEAL5
HIST3H2A
SSTR1
AC005682.6
BMPR1B-AS1
COL17A1
CD1A
ADAMTS20
MRGPRX2
CDH2
MMP3
CYP21A2
MAFA
RNU6-242P
AKR1C2
CPLX2
RP11-676B18.1
EPO
SIX2
AKR7A3
CLCA4
CCL28
ZG16B
RP11-126H7.4
GALR1
SPINK4
SEMA3D
CCL16
NRG2
CCDC85A
MIR27A
MS4A8
LHX1
DLX4
HORMAD1
CCL23
RP11-96C23.14
RP11-345J13.1
TEPP
C2orf40
CNTNAP3
PLEKHD1
ZBED2
LINC01330
bP-21264C1.1
LL22NC03-75H12.2
S100A7A
FOXD1
CALHM1
RERGL
RUFY4
LINC01412
KISS1
FOXD4L1
AP000445.1
CLEC4G
CLPS
KLHDC7B
SRD5A2
EGR3
AADAC
CCL7
FUT7
HS6ST3
LAG3
S100B
FOXD3
OR7E91P
GLDN
SYN1
VSTM2L
TMEM249
SYT1
KCNJ6
C15orf54
TIGIT
AK5
FBXO40
COL6A5
HIST1H2AG
FGF5
BCAS1
PIK3C2G
PAX1
MAGEA12
TRH
FDPSP8
NTF4
GPR112
TUBA3E
FFAR3
NXPH4
MUC5AC
DMP1
JPH3
SLC7A3
MIR8071-1
ELFN1-AS1
RP11-35J10.6
GJA3
SHISA3
THRSP
HIST1H1T
CNTFR
GNG3
MUC19
LKAAEAR1
NR4A3
RGS8
DPY19L2P1
PLCZ1
SLC7A14
GATA5
MCIDAS
MIR8071-2
PSCA
KCNK9
IRX6
CAV3
DSCR8
CLEC3A
GFRA2
CDH7
HTR4
CYP21A1P
RP11-557C9.3
GAD1
NBPF4
CYP3A4
CLDN25
ADRB3
AC006960.5
FSD1
RP11-121C6.5
GATA4
HIST1H2AE
HMX2
CCNO
AADACP1
LINC01354
TNR
TRIM72
SUSD3
GABRA5
DLX5
PPM1E
MIR6503
RGS7BP
SCN2A
SLCO5A1
EFCAB1
OGN
CACNA1H
CTA-280A3.2
TDPX2
RP11-74M13.4
RP11-362K2.2
NCAN
DBX2
MAST1
MYLKP1
ELANE
RAET1K
LMX1A
LCN1
NBPF6
LINC00548
DES
SAA2
MIOX
GFAP
XKR7
PTPRN
UNC5A
A2ML1
PTN
RP11-166N6.1
HIST1H2BM
PTCHD2
MOCS1P1
TMPRSS6
CSF3
CRYBA2
C1orf140
IGFBPL1
RNASE7
RP11-182J1.14
AGMO
CTC-490E21.13
HIST1H2APS3
LCN12
CYP2T1P
GABRE
LINC01186
MSMB
IGHGP
GLDC
LINC01340
COL2A1
ACKR1
AGR2
PLA2G4D
IFNL3
KRT18P55
KCNH2
DOK7
GPR37L1
MIR3153
TCL6
CFAP99
LCN6
CPB1
PYY
NAT16
CCL20
MED15P4
SMC1B
INMT-FAM188B
CRISP3
TCAM1P
D4S234E
VN1R48P
CCDC185
GABRA3
ERVV-2
C1orf194
DNAJC12
AC093063.2
IFNL2
OTOR
LINC01267
HHATL
LARP1P1
LIN28A
PNLIPRP2
PCAT29
HIST1H3F
CARD17
CDK5R2
NRG1
AC012454.4
DPP6
TH
KIAA0319
UBE2SP2
GNG4
RP11-243M5.2
POTEC
STMND1
OR7E13P
ALX4
OTC
PTGFR
LTB
CNN2P3
DYDC2
SPACA4
DLL3
MUC5B
KCNA4
EFNA2
CPA2
NPR3
PCSK1N
SERPINB7
SLC16A12
MMP12
RP11-25L3.1
ELFN2
RNU6-1189P
USP41
PROZ
LLNLF-187D8.1
SERPINA9
TCL1A
LRRC38
GPR144
CADM3
LINC01484
SHISA8
GDPD2
TMEM171
SFRP1
SSTR2
LPHN3
NTSR1
SIX3
TCL1B
TRPM1
KRT75
IFNL1
FIBCD1
RUNDC3A
APOA1
LGALS9C
GABRG1
TFF3
LGALS9B
CTD-2033D15.3
RP13-49I15.6
LIX1
KPNA7
DDN
ZIC2
RP11-32D17.4
KRT89P
GPR158
RP11-557C9.1
CYP4F23P
FAM83A
KLF14
FGFBP2
SPANXB2
MAGEA6
ABRA
IL12B
FAT2
AC093642.1
NUPR1L
PCDH9
MGAT5B
AARD
LRG1
C2CD4B
AC234582.1
MIR221
RN7SL417P
TMPRSS4
CHGA
LA16c-380H5.6
PGLYRP4
SLC1A1
RNU6-813P
ROBO2
ACTN2
XXbac-BPG154L12.5
SLC25A24P2
MIR7152
GFRAL
CHST9
SPIB
TEX26
OR7E62P
CACNA1B
SLC8A2
CD19
GAL
TNIP3
RN7SL5P
NEU4
HRASLS5
SLC14A2
DEPDC1-AS1
CCL21
RP11-346C4.3
KCNH6
TACC1P1
GNGT1
ZPLD1
DPYSL5
AC068137.13
ALG1L
EIF4E1B
PAX2
PLCXD3
SBK2
MYO3B
C10orf91
C4orf50
RP4-697K14.15
TUBA4B
RP11-282A11.4
RP11-91H12.1
BEX1
PMCH
KRT18P8
MAS1L
WDR38
RP11-133K1.11
MAGEA3
CNGA2
GIMAP3P
HAS1
RPE65
SLC14A2-AS1
GSDMC
PRLH
CERS3-AS1
SGCG
AC013268.3
DRC7
AGR3
STXBP5L
BMPER
RP11-15E1.1
DCT
HOTAIR_4
RP11-243M5.3
RP11-312A15.2
RP3-453C12.15
RNASE10
CLEC4GP1
RP11-495P10.9
NPHS1
KIF4B
C10orf90
RNF186
TMEFF2
MIR6746
UNC13C
NGB
ZNF725P
KCNMB2-AS1
CALML5
TRPM5
GABBR2
TCF24
MUC13
KCNA1
MKRN3
XAGE3
TCF21
MGAT3-AS1
RNU1-36P
ZBBX
NXPH1
SNORA2
CYP2AC1P
IFNB1
APCDD1L-AS1
RP11-321P16.1
TMEM82
SOX2
PGA5
NETO1
VSTM2A-OT1
SHISA9
CARTPT
SLC7A13
SEZ6L
MIR4666A
SLITRK6
C20orf85
MAGEC1
AC234917.1
PRSS3P2
GABRA4
TMEM246-AS1
SNTN
RP11-616M22.12
RP11-697H10.1
CAPZA3
RP11-490D19.8
CCDC60
BFSP2
TGM3
KRT8P22
AMPD1
OR2L13
CXCL13
TLX2
IL17B
RP11-71L14.4
MRPL15P1
RP11-611O2.2
CLDN8
ZAN
TFF1
AC114776.1
LYPD8
RP11-167B3.2
CLEC6A
GRIA2
CALB2
C6orf222
LRRIQ4
IGHEP1
SLC5A8
RP11-166N6.3
SPTSSB
IRG1
S100A8
HIST2H3D
CXCR5
RP11-407P15.1
ZDHHC22
NDST4
ITIH2
FAM25A
NLGN1
SERPINA12
FAM135B
SALL3
RP11-63E5.1
GPR26
HIST1H2BPS2
VIL1
SIRPB3P
CDSN
UTS2
CYP4F24P
RN7SKP161
FAM71F1
DPRX
HIST1H2AB
SSTR5-AS1
DYDC1
LINC01264
RP4-673D20.4
IL17C
SLC27A6
RP11-470C13.4
RP11-35N6.1
ASCL4
SLC4A1
MIR27B
SCDP1
SPOCK3
KCNJ16
ELK2AP
CACNG6
CYP1A2
HIST1H3I
LINC01468
TPSG1
RP11-358L22.2
COX6CP1
SBSN
NELL1
ITLN1
RP11-459D22.1
RP11-8L2.1
RP11-281P11.1
CHGB
S100A9
CPA6
C18orf42
CXCL17
SLC5A5
MEIKIN
INA
RN7SKP44
RP11-312A15.3
MIR6071
AC012512.1
BPIFA4P
EN1
RP11-33I11.3
MAEL
CSMD3
HIST1H2BI
DLX2-AS1
HIST1H4B
C15orf59-AS1
COX6A2
FOXG1
CCDC108
SCRT1
MAGEC2
LINC00238
TMEM179
RPS3AP2
TRIM15
RNA5SP515
ZFP42
C1orf105
MOGAT1
PAPL
TPPP2
RAX2
SEZ6
IVL
SLC22A31
RP11-381E24.4
RP11-1221G12.3
MAS1
SLC36A2
LHX9
AKAP14
KRT8P2
RIMS2
MT3
HIST2H2AB
LINC01411
GPR139
ACSM2A
AL136985.1
OR10A3
ZP4
ADAMTS19
SLURP1
KRTAP13-4
IGF2BP3
GMNC
ANKRD30BP1
FMO9P
RP11-46I8.4
HUS1B
BEND2
FCAMR
ART3
NATP
AMER3
RP5-862K6.4
MT1H
ERVV-1
IGFBP1
NTNG1
KRT3
STK19B
HTR3A
C16orf92
GP2
KLHL30-AS1
C1orf167
PRSS1
ARL2BPP4
AL138935.1
RXFP3
CSTL1
CTD-2105E13.16
PF4
RP11-180I4.4
KCNG1
RP11-1134I14.2
LINC01532
MALRD1
PAGE2
LINC01208
HSPE1P9
RP11-14K3.1
KRT8P30
LYZL2
PEX5L
UPK1A
RP11-734K21.2
RP11-395P13.7
ELAVL3
RP11-326N17.2
KRT2
OR2L3
HTR1E
SLC26A9
CCKBR
C1orf185
MAGEA4
RP1-66C13.4
ARF4P2
HIST1H2BB
TF
KRT18P68
HIST1H4A
MKNK2P1
HIST1H2AH
RP5-984P4.6
MT1JP
TBX10
ISL2
DHRS2
KLHL1
ABCB11
RP11-114M1.3
SLC1A6
PGLYRP2
MAPT-IT1
TUBB4A
MUC21
RP1-170O19.23
CYP2T3P
SAA4
CCDC83
RP11-243M5.5
IL21
RP11-750B16.1
BBOX1
AC108004.1
SYT9
LINC01385
HOTAIR_5
MIR23B
STRA8
CCL24
ZMAT4
REG4
FOXA3
PROK1
APOBEC4
RP11-553N16.5
TUBA3C
NT5CP2
NCCRP1
MYOG
ANKRD30B
LGSN
BRINP3
LRRC31
OR2B11
DKK1
HS3ST5
PAH
ASIC5
KRT31
PROKR1
NKX2-3
WASF5P
OTP
B4GALNT2
C10orf82
RP11-1193F23.1
RP11-404G16.2
HMGB3P6
TLX3
SOHLH1
RP11-2K6.1
CALY
FADS6
R3HDML
HS3ST4
RP11-452L6.8
MIR125B1
ZIC1
RNU6-1161P
KRT20
ROS1
TUFMP1
RP11-583F24.7
NPY2R
RP11-493L12.6
AC098592.6
RP11-432M8.17
RN7SL128P
C4BPA
RP4-616B8.6
SLC18A1
AC112249.2
RP11-382H24.2
AACSP1
OTOG
PIGR
PADI6
RNU6-1039P
OR7E158P
PSAPL1
RP1-167O22.1
ARL14
LINC01105
RP11-54H7.4
BPIFA2
CYP2B6
F2
SPHKAP
RP4-673D20.6
BPIFB6
SNCB
DMRT1
IFNL3P1
CTC-458A3.1
SNX19P1
AL365361.1
MIR770
KIRREL2
RNU1-22P
PGK2
RP11-116D17.4
MRGPRX3
MIR4524B
MIR4530
DHRS7C
COL6A4P1
OSTN
RP11-638F5.2
[truncated: 450 more rows]
