# Supplementary material for: Identification of key modules and genes associated with breast cancer prognosis using WGCNA and ceRNA network analysis
Source: Aging (Albany NY). 2020 Dec 9;13(2):2519–38. doi: 10.18632/aging.202285 (PMC7880379; doi:10.18632/aging.202285)
Supplement: Supplementary Table 3 [file aging-13-202285-s004.xlsx]

## Sheet: DEmRNA GO
#Term	Database	ID	Input number	Background number	P-Value	Corrected P-Value	Input	Hyperlink
cellular anatomical entity	Gene Ontology	GO:0110165	260	2864	9.03684e-41	4.00784e-37	AOC1|KCNE1|LYVE1|KRT34|BGN|GSTA3|CCDC141|MFAP2|FAM71A|TEX19|PYCR1|GFAP|S100A14|CDC45|LHX2|VAX1|LINGO1|PALM2-AKAP2|INHBA|TP53AIP1|NAALAD2|EXO1|WDR62|SCN4B|ROS1|UNC93A|CDH7|MYT1|WT1|IL36RN|FHL5|CYP1A1|SPAG6|ISM1|ZIC1|RAMP1|ASZ1|DLX4|KLHL4|SFRP1|UMODL1|TSPAN7|GIPC2|SLC15A1|MUC13|RSPO3|RNASE10|ABCD2|PRRG3|SYT1|SRPX|PRR11|CLDN6|ANGPTL1|PENK|PNLIP|PPP1R14A|DMGDH|GPR17|OSTN|DMRT2|IL21R|CCL7|MMP12|KISS1R…	http://amigo.geneontology.org/amigo/term/GO:0110165
intracellular	Gene Ontology	GO:0005622	202	2228	1.7282e-31	1.53291e-28	MALRD1|TRIM15|COL11A1|MGARP|HIST1H4I|CAV3|KRT35|KIF4B|JPH3|APOC3|NKX2-2|APLP1|S100A14|SLC35G2|GHR|SAMD11|LIX1|GPR182|ACSM5|HIST1H2BJ|FAM64A|COX6A2|FMR1NB|CAPN9|MYT1|SP8|JAKMIP1|STRA8|CD34|DMP1|LDB2|CX3CL1|PER1|TSPAN1|RBP7|NKX6-1|CNN1|GFAP|AVPR2|SYT4|SYT5|CXorf67|KPNA7|NCAPG|PID1|ALDH1L1|ANKRD53|SLC7A5|NMRK2|MAFA|KREMEN2|MNX1|PPP1R1A|IFNL1|PPM1E|IFNL3|KLHDC7B|KRTAP4-1|DGAT2|SOHLH1|ZBBX|DOCK11|ITPK…	http://amigo.geneontology.org/amigo/term/GO:0005622
binding	Gene Ontology	GO:0005488	202	2247	4.83662e-31	3.57507e-28	AOC2|HIST1H4D|UTS2B|CDO1|DACT2|TNMD|CCDC151|TGM3|SQLE|CACNA1H|ITPKA|DENND2A|AMZ1|CD177|NTRK2|SIX3|NAALAD2|RELN|DLGAP5|RERGL|MSMB|FMO2|CDKN2A|LIPE|BMP8A|RNASE7|NUF2|CRB2|LDB2|NEUROD1|CCL20|CXCL10|MMP13|KCNJ6|RSPO3|CXCL2|RNASE10|SPRY2|SYT1|BPIFB1|PCK1|VIP|MFAP4|NPW|PAK7|SCN3A|XPNPEP2|SPC24|HHIPL2|DMD|CCDC60|CLSPN|ZWINT|NUAK2|SAA4|CELF3|SYT5|CALHM1|PAGE5|MNX1|DPEP1|KLHL33|CCKBR|AMH|TNNT3|TDPX2|USP44…	http://amigo.geneontology.org/amigo/term/GO:0005488
extracellular region	Gene Ontology	GO:0005576	105	736	2.77853e-30	1.76039e-27	AOC1|KRT38|ELANE|LYVE1|HIST1H4I|CD34|EPO|BPIFB6|APLP1|ADAMTS5|RTBDN|RELN|PGLYRP2|IL36RN|CETP|PYY|MUC1|ENPP2|CRB2|MUC13|CD300LG|CXCL2|BMP2|ORM2|PRRG3|CXCL9|MYLK|CSF3|FREM1|ANGPTL1|NPW|APOC3|DES|IGFL2|TMEM132A|PKHD1L1|C4BPA|CPA6|IGSF10|CEACAM6|PGK2|ANGPT4|FIGF|METRN|DNASE1L2|ABCB11|NPHS1|ACO1|HIST1H2BM|F10|FGF2|HIST1H2BK|PROK1|DDR2|CALML5|VSTM2A|KRT3|F12|FABP4|PRKAR2B|SLC4A1|COL2A1|FZD4|ASPA|PVALB|…	http://amigo.geneontology.org/amigo/term/GO:0005576
cellular process	Gene Ontology	GO:0009987	230	2852	4.73253e-29	2.6236e-26	AOC1|COX6A2|MGARP|HIST1H4D|GFRAL|HIST1H4H|LRFN2|SCRT1|APCDD1|CAV2|MGAT5B|LGSN|LINGO1|LRRC70|ZP4|SIX2|IRX6|TYRP1|CDKN2A|SOD3|HIST2H3D|CENPF|KRT20|OASL|POSTN|CCDC151|KLHL1|ADAMTS20|CXCL13|KIFC2|IGHEP1|NKX6-1|ZAN|SYT9|RAX2|PNCK|FN1|MAPK15|TUBB4A|SLC2A4|SYT4|MYLK|RHBDL1|CSTL1|PF4|GFRA2|PID1|SPPL2C|CSF3|SPC25|SPC24|STARD10|FOXP3|SSTR1|CLSPN|GRIA2|KCNG3|TBR1|GRIA4|LPPR5|PRG4|MAFA|CHL1|KREMEN2|NDRG2|KIT…	http://amigo.geneontology.org/amigo/term/GO:0009987
organelle	Gene Ontology	GO:0043226	187	2086	1.29881e-28	6.40025e-26	HIF3A|TMOD1|CPM|SSX1|KRT31|HIST1H4J|HIST1H4H|KRT35|HIST1H4L|EPO|SCRT1|SCRT2|PYCR1|CSRNP3|CAV3|GSN|SPX|LHX1|LHX2|GPAM|POC1A|SAMD11|DHRS2|SIX2|SIX3|ACAN|FGG|SCX|JAKMIP1|CRISP3|CREB5|TONSL|ACSM2B|HTR4|TSPAN1|CYP3A4|AKAP6|FN1|SYNPO2|PID1|SCN3B|DMRT2|MYO3B|MMP11|RAX2|ZWINT|NTSR1|CD209|FAM64A|APOA2|ZG16B|LHCGR|TDPX2|EGR2|TNXB|SOX17|ZIC3|ZIC1|GDF15|THRSP|TOP2A|KNCN|G0S2|PRSS56|CDC25C|DNASE1L2|NCAPH|MRAS…	http://amigo.geneontology.org/amigo/term/GO:0043226
protein binding	Gene Ontology	GO:0005515	153	1688	6.00212e-24	2.66194e-21	EXO1|COL11A1|BUB1B|KRT31|TBX20|UTS2B|RAET1L|HIST1H4L|LIFR|APCDD1|PYCR1|ROS1|TMEM171|TPX2|POC1A|RYR3|DHRS2|SIX3|RELN|PYGM|ADM2|DAZL|CAPZA3|IL36RN|DIAPH3|CENPF|SPAG5|CENPA|DMRTC2|PNCK|GIPC2|FGFR3|ADRA1A|CNN1|SYT1|AVPR2|MASP1|FOXA3|DLX2|SYNPO2|TAS1R3|TUBB4A|SPC25|CDC20|CD1A|SYT5|PAGE5|APOA2|TNNT1|AMH|IFNL2|IFNL3|USP44|CCNE1|APOBEC1|SOX17|CLDN9|PRLH|SCX|NKAIN1|TROAP|TFR2|PDLIM3|CDC25A|PMCH|HIST1H2BE|…	http://amigo.geneontology.org/amigo/term/GO:0005515
membrane-bounded organelle	Gene Ontology	GO:0043227	166	2030	1.26993e-21	4.69345e-19	HBM|HIST1H4E|SSX1|TBX20|HS3ST4|TNMD|PKDCC|MUC21|CASP14|DMGDH|NKX2-2|PLIN1|ADAMTS5|TPX2|LHX3|DCD|GSDMC|DHRS2|UPK1A|SORBS1|ESPL1|IRX6|PYGM|SP8|CDKN2A|B3GALT1|DIAPH3|SPAG6|CENPE|DMP1|OASL|CCDC78|TF|LPL|HIST3H2BB|DMRTC2|PNCK|GATA5|BMP3|SYT1|TUBB4A|URAD|KIT|GOLGA8M|PSG9|SLC4A1|PAK7|HSPB7|MAMDC2|PAH|APOA1|ZG16B|APOB|DRP2|EGR3|DGAT2|MEOX1|DLX6|AKR1C3|PGK2|SPX|DNASE1L3|CDC25A|NCAPH|GBP5|HIST1H2BE|HIST1H2…	http://amigo.geneontology.org/amigo/term/GO:0043227
ion binding	Gene Ontology	GO:0043167	98	962	9.21965e-19	3.14532e-16	HBM|EGR1|TRIM15|AGMO|JPH2|MOCS1|SCRT1|SQLE|RYR3|NTRK2|CAPN9|SP8|CYP2A13|F2|CRB2|GALNT15|KLK4|GATA4|GATA5|IGHEP1|MYLK|APOBEC1|STARD9|EME1|FOXP3|MMP11|DQX1|ACADL|DPEP1|EGR2|GLDC|CPA1|PAMR1|ZIC3|LCN12|DMRT1|HMMR|LIN28A|CNGA2|SMYD1|NELL1|NELL2|SBK1|SCUBE3|ESR2|INSM1|SNCB|SPOCK3|GNAL|POLQ|PAPL|ACAN|KIF15|FABP4|AKR1C1|AKR1C2|GNAI1|TP63|SIK2|PDE3B|ALAS2|TGFBR2|COMP|RXRG|CYP1A1|CYP1A2|SFRP1|ADH4|CLGN|APO…	http://amigo.geneontology.org/amigo/term/GO:0043167
intracellular organelle	Gene Ontology	GO:0043229	149	1863	1.07588e-18	3.40823e-16	AOC1|TIMP4|PBK|BUB1B|PLK1|ISL2|PCSK1|KRT35|KRT37|HBB|MOCS1|SCRT1|CAV1|LHX9|ACSM5|NTRK2|DCT|TNNI3|CENPM|DIAPH3|CENPE|ACSM2A|KLHL1|COX6A2|ORM2|FN1|ACSL1|CHST9|KIF23|SRPX|FOXA3|ULBP1|SYNM|MMP13|NUAK2|SLC7A5|ZNF280A|NDRG2|KLHL33|CCNE2|GLDC|EGR1|ATP1A3|COX6C|TRH|CFL2|ASZ1|TICRR|FOS|TSHZ2|SGOL1|LIN28A|HOXC11|HIST1H2BF|PAX1|HIST1H2BC|ACO1|COX7A1|FGF2|HIST1H2BJ|ORM1|ABCA10|HIST1H2BD|RDM1|PRDM13|SH3D19|HO…	http://amigo.geneontology.org/amigo/term/GO:0043229
intrinsic component of membrane	Gene Ontology	GO:0031224	90	843	1.70487e-18	5.04072e-16	LYVE1|JPH3|KIAA1024L|SLC30A8|TMEM179|CACNA1H|LINGO1|UPK1A|ABCD2|NPR1|ENTPD8|TSPAN7|CACHD1|SLC15A1|ZAN|SYT1|SLC2A4|SYT4|KCNIP2|GALR1|ULBP1|XPNPEP2|OR2L3|OR52E6|NTSR1|CD209|CHL1|KIT|TMEM132A|SPTSSB|GDPD2|CLDN8|CLDN9|HTR2A|TRPM1|CLDN6|ERVV-1|ERVV-2|OR2B11|ABCB11|MS4A15|FAM162B|TMEFF2|GABRQ|TMEM190|SLC18A1|SCN5A|SHISA9|SORCS3|ZP4|OLFM3|ADAM33|SLC22A24|MGAT5B|RNFT2|TGFBR3|SCN11A|COL25A1|NLGN1|SERTM1|M…	http://amigo.geneontology.org/amigo/term/GO:0031224
membrane	Gene Ontology	GO:0016020	125	1443	2.69827e-18	7.47926e-16	TUSC5|AOC3|AOC2|TMOD1|HIST1H4J|JPH2|TNMD|CLMP|HPSE2|ROS1|GPR182|NTRK2|GNG13|AQPEP|CT83|RERGL|GP2|TYRP1|CDH20|CENPE|CCDC78|CRB2|HTR4|LPL|UMODL1|CYP3A4|KCNMB1|GPR6|GNG4|C16orf92|GNG3|NETO1|LRTM2|SCN3B|RASSF9|OR52E6|GRIA2|EPB42|SLC7A3|GPR19|PRG4|CHL1|ACADL|APOA1|SPTSSB|LILRB5|GLDN|DRP2|PALMD|HTR2A|DIO1|FIGF|IGF1|KCNK15|MRAS|HCAR2|DDN|CORO2B|F10|MISP|SPACA4|KCNH1|SCN5A|SOGA3|RXFP3|SYN1|RPE65|OLFM3|KI…	http://amigo.geneontology.org/amigo/term/GO:0016020
cytoplasm	Gene Ontology	GO:0005737	135	1641	5.97362e-18	1.55841e-15	HIF3A|PCSK1|HBB|PIH1D3|CASP12|CCDC141|CAV2|CENPU|TPX2|NCAN|CCL28|LIX1|RELN|ABCD2|AQP7|LIPE|OIP5|SPAG6|KRT20|KLHL4|RBP7|GIPC2|KIFC2|FGFR3|FN1|ACSL1|AKAP14|NCAPG|SLC4A1|SPPL2C|SCN3A|HSPB6|MYO3B|DMD|GRIA2|MAMDC2|C10orf90|HOXB9|CAPN11|ACADL|APOA2|TNNT1|HN1|DRP2|WISP1|MT1M|SRMS|ATP1A3|FABP9|PPP1R14A|DPYSL5|GPLD1|ALDH2|HMP19|PGM5|LIN28A|DDN|TK1|ADAMTS1|HIST1H2BO|ARNT2|ASPA|ESR2|PEX5L|SSTR1|ABCA8|SCTR|V…	http://amigo.geneontology.org/amigo/term/GO:0005737
plasma membrane	Gene Ontology	GO:0005886	81	726	8.90443e-18	2.19395e-15	SERPINA12|C2CD4B|KCNE1|DTL|RAB26|GRIA4|LAG3|JPH2|CSMD3|OR52E6|PRKAR2B|AKAP12|GABRA4|SLC5A8|C2orf88|PRC1|MIEN1|SPTBN1|SLC14A2|SLC35G2|LHCGR|FZD4|NTNG1|CCR8|NEURL1|CD80|S1PR1|STAB2|CPNE7|PARD6B|AMER2|CLDN9|HRH3|CEACAM6|CT83|SCN4B|UNC93A|GP2|CLRN1|SLITRK6|SCN11A|KCNK15|LIPE|IL17REL|NLGN1|ASIC5|KIF18A|UNC5A|CDH12|MRAS|CLDN25|ORC1|CHRNA4|ABCB11|ALPP|CD36|SLCO1A2|LGSN|F10|GPR26|FFAR4|ENPP2|CA9|GJA3|BMP…	http://amigo.geneontology.org/amigo/term/GO:0005886
intracellular membrane-bounded organelle	Gene Ontology	GO:0043231	132	1606	1.5173e-17	3.404e-15	HIF3A|HIST1H4B|RDH5|BUB1B|AGMO|HIST1H4J|HIST1H4H|HIST1H4L|MAFA|PYCR1|GATA4|GSN|TUBA3E|LHX9|ACSM5|PARD6B|PLCZ1|CT83|ABCD2|RAX|MAS1L|WT1|CENPF|DMRTC2|CYP3A4|MUC13|DLX6|NKX6-1|ADAM8|RHBDL1|APOBEC1|SPC25|DHRS2|RECQL4|NGB|CLSPN|ZWINT|TBR1|DQX1|EDNRB|CCNE1|SOX17|CLDN8|ZIC3|DLX4|MAP1LC3C|COX6C|PRSS56|EPN3|PPARG|PAX2|MTFR2|HIST1H2BI|ASPA|LMNB1|TMEM190|ITM2A|DEPDC1|SNCB|NEIL3|UBE2S|HIST1H3D|ACAN|CLDN19|VC…	http://amigo.geneontology.org/amigo/term/GO:0043231
cell periphery	Gene Ontology	GO:0071944	86	812	1.53506e-17	3.404e-15	KCNE1|CPM|KCNE4|JPH3|LIFR|APLP1|GSN|GNG11|AQPEP|TPSG1|ENPP2|ENTPD8|PIK3C2G|ZAN|AKAP6|BMP2|CLEC2A|AVPR2|ROBO2|FAT2|OR2L3|ACVR1C|DTL|GRIA2|EPB42|NTSR1|LHCGR|CLDN9|DIO1|CEACAM6|TRPM5|BMX|ANGPT1|TRPM1|PGM5|ABCB11|GYS2|SLC26A9|APOLD1|TYRO3|SPACA4|OTOG|GNAL|GABRD|SCN5A|PTGFR|EPHA8|RET|CCR8|LHFPL5|CLCA4|CNKSR2|NEURL1|SLC6A19|SGCZ|MRGPRX3|SLC8A2|ART3|COL25A1|D4S234E|KCNJ6|KCNJ4|ATP1A3|COL10A1|CFB|CRYAB|G…	http://amigo.geneontology.org/amigo/term/GO:0071944
regulation of cellular metabolic process	Gene Ontology	GO:0031323	108	1229	2.3487e-16	4.96023e-14	HIST1H4B|ELANE|TRIM15|HIST1H4I|MAFA|SPX|LHX9|HTR2A|AURKA|WT1|STRA8|LDB2|CCL21|PER1|FN1|GNG3|GFRA2|CCL7|RAX2|NTSR1|GPLD1|MNX1|APOA1|PPP1R1A|IRG1|CCNE2|EGR1|SOHLH1|CSRNP3|ZIC2|GRM4|CCL20|DLX6|CCL24|TFR2|FOS|TSHZ2|HOXB1|LMX1A|HOXC11|HOXC13|SMYD1|PAX2|FGF4|HOXD12|CDC20|SLC22A3|UBE2S|HES6|DDN|MYOM1|ONECUT2|FOSB|KIF14|MAPK10|ITIH2|ITIH5|GBX2|MYH6|PRAME|TBX10|TCF24|S100A7|CST6|EEF1A2|LEPR|IGF2BP1|EBF2|R…	http://amigo.geneontology.org/amigo/term/GO:0031323
extracellular vesicle	Gene Ontology	GO:1903561	63	514	7.76995e-16	1.49825e-13	PTH1R|KRT38|CLDN11|CD177|CPM|HIST1H4B|AKR7A3|HIST1H4J|SAA4|KRT35|KRT34|KRT37|TFF3|KRT2|FABP4|MFAP4|SLC5A5|HIST1H2AJ|SLC5A8|HIST1H2AG|GPRC5A|DPEP1|CST4|HIST2H2AB|DCD|DHRS2|UPK1A|MIEN1|ABCB1|S100A9|S100A8|FGG|PRELP|HBA2|PI16|GP2|CST5|ANXA1|SCN11A|CLIC5|SOD3|HIST1H4L|DST|CAT|SLC26A9|GIPC2|GSTA3|HIST1H2BH|HIST1H2BI|F2|CDH2|HIST2H2AC|ORM2|PGLYRP2|LRRC15|GNG4|ITLN1|IGFBP6|ATP1A2|A2ML1|GNAL|RBP4|VWF	http://amigo.geneontology.org/amigo/term/GO:1903561
integral component of plasma membrane	Gene Ontology	GO:0005887	43	258	2.73622e-15	5.05632e-13	GHR|FXYD1|GABRG2|SLC7A5|NTSR1|SLCO5A1|TIGIT|PRG4|LIFR|SLC26A9|APCDD1|GABBR2|PLXNA4|CLCA4|SLC19A3|SCN2B|PROKR1|TPSG1|GRM4|SLC8A2|SYNDIG1|KCNIP2|KCNJ3|ART3|CALHM1|KCNJ16|KLB|KCNK16|NPY2R|TSPAN1|TSPAN7|CNTFR|FFAR3|ADRA1A|HCN2|SLC7A10|SLC7A13|IL6|COL25A1|OPRD1|NPBWR1|SCN1A|SHISA9	http://amigo.geneontology.org/amigo/term/GO:0005887
vesicle	Gene Ontology	GO:0031982	71	667	8.09356e-15	1.4358e-12	DPT|EPHB1|SLC6A4|KRT31|CLPS|HIST1H4H|RET|SYT5|CD300LG|F12|CLIC5|BHMT2|CHL1|BBOX1|CAV3|SPTBN1|ZG16B|APOB|CD1A|PPBP|CHGB|FGFR3|VIL1|SPHKAP|HIST1H3J|ADIPOQ|CRISP3|GDF15|BCAS1|CST6|CLDN5|CST4|TGFBR3|TYRP1|DES|PYGM|COMP|GPD1|CRHBP|CAPS|HIST1H3B|HIST1H2BE|LAMP5|GPC3|CREB5|KRT37|PMP2|KPRP|ACO1|SLC26A9|CADPS|S100A7|HPD|ORM1|PROZ|F7|IVL|ALDH1L1|SLC7A11|ALDH2|C6|GNG4|ITLN1|STAB2|RIMS2|DST|PTPRN|SLC18A1|C2o…	http://amigo.geneontology.org/amigo/term/GO:0031982
catalytic activity	Gene Ontology	GO:0003824	100	1162	1.03303e-14	1.76211e-12	AOC1|AOC2|CPM|CDO1|BGN|TIMP4|DMGDH|ROS1|TPX2|GPAM|CYP2F1|DHRS2|NTRK2|TYRP1|SOD3|ENTPD8|GRM4|PKMYT1|PAFAH1B3|AVPR2|KIF23|DPP6|ALDH1L1|MMP10|MMP13|PROL1|PRG4|GABBR2|FAM13A|ACADL|IRG1|TDPX2|DRP2|CPA1|CSRNP3|HTR2A|AKR1C2|CX3CL1|CCL23|ANGPT1|CCL24|BUB1|AGAP11|MRAS|GBP5|CMA1|ACO1|MYH6|CHST6|UBE2C|SYN1|SERPINA12|EPHA8|NDST4|KIF14|KIF15|ADAM33|ADAMTS19|GPRC5A|GAD1|CDC6|FZD4|S1PR1|BBOX1|PPAPDC1A|PDE3B|CST…	http://amigo.geneontology.org/amigo/term/GO:0003824
extracellular space	Gene Ontology	GO:0005615	66	596	1.33094e-14	2.18619e-12	FGF1|MRAS|TIMP4|CLPS|SAA2|KRT37|HBB|LGI4|FABP4|PCK1|GPD1|ALDH2|ITM2A|PAH|SLC44A4|ITIH2|MIEN1|ADIPOQ|GNAI1|AMH|RNASE7|DRP2|DHRS2|GNG4|MYLK|OGN|S100A9|RELN|PVALB|SCT|CST6|CLDN5|SAA1|HIST1H1B|EPHB1|CETP|TRHDE|LRG1|VGF|SLC7A11|RAMP1|TUBB3|RAET1L|HIST1H3B|MAST1|SPHKAP|CXCL11|CXCL10|GIPC2|GSTA3|HIST1H2BH|CD177|SERPINB7|OLFM3|PCSK1N|PKHD1L1|LTB|GPIHBP1|MASP1|CALML5|C6|GPX3|ITLN1|S100P|VWF|ALDH1L1	http://amigo.geneontology.org/amigo/term/GO:0005615
membrane-enclosed lumen	Gene Ontology	GO:0031974	72	697	2.05981e-14	3.1792e-12	C2CD4B|CAMP|MMP11|HIST1H3I|HIST1H2AM|MYOC|IGF1|MAPK10|HIST2H2BF|SOX3|NKX2-2|HIST1H2AD|HIST1H2AG|SOX17|MNX1|PYCR1|HIST2H4A|TRDN|CA9|HIST1H2BO|NEK2|ZBTB16|CLEC3B|USP44|GLDC|RDH5|PIF1|APOA1|CDCA2|HIST1H2BI|CDCA5|PRELP|SAPCD2|HIST2H2AA4|ASF1B|ATOH8|FIGF|SMC1B|BUB1|SOD3|CENPI|FOS|CDC25A|ANLN|STON1-GTF2A1L|FOXD3|LIN28A|HOXC11|PPARG|HIST1H2BG|EPN3|GINS1|MEIKIN|HIST1H3H|FOXH1|MUC13|UHRF1|HIST1H2BJ|HIST1H…	http://amigo.geneontology.org/amigo/term/GO:0031974
nucleus	Gene Ontology	GO:0005634	97	1182	3.53733e-13	5.06067e-11	HIST1H4A|SSX1|HIST1H4K|HIST1H4H|FAM71A|BUB1B|SIX3|NDRG2|CT83|WT1|CENPM|CDKN2A|AURKB|DMP1|HIST3H2BB|CENPU|NKX6-1|NCAPG|PID1|PAK7|FOXP3|DMD|CDKN1C|EDNRB|EMX1|TDPX2|GLDC|EGR1|ZIC1|DLX4|PGK2|DLX2|ALPK3|BUB1|DNASE1L3|HIST1H2BE|PYDC1|HIST1H2BB|FGF2|TYRO3|HIST1H2BK|CCNO|PRDM13|DEPDC1|SNCB|NXNL1|HLF|HIST3H2A|ISX|TIGD3|CBX2|TBX10|PTTG1|DUSP1|TCF21|FAM71E2|CCNB1|ASCL4|MEIKIN|LEF1|SYNE3|HIST1H1A|MAEL|IGFALS…	http://amigo.geneontology.org/amigo/term/GO:0005634
extracellular organelle	Gene Ontology	GO:0043230	53	444	3.8216e-13	5.2965e-11	MFAP4|MYH11|HIST1H4A|PCK1|ERMN|CPM|LYVE1|TFF3|HIST1H2AM|EPO|BPIFB1|PRKAR2B|BHMT2|HIST2H2BF|HIST1H2AJ|CLDN11|MUC5B|CHL1|MIEN1|SPTBN1|AKR1C3|WASF3|FHL5|S100A7|FGG|PGK2|GP2|TGFBR3|EPHB1|MIOX|HIST1H3C|GPC3|IGFBP6|HIST1H3D|KPRP|HIST1H2BM|HBA2|HIST2H2AB|PAFAH1B3|BMP3|MAST1|DDR2|FCRL4|ALDH1L1|SLURP1|SLC7A11|FAT2|OGN|ANGPTL1|PSG9|CASP14|SLC1A1|CD19	http://amigo.geneontology.org/amigo/term/GO:0043230
cellular metabolic process	Gene Ontology	GO:0044237	140	2027	5.53177e-13	7.31189e-11	TIMP4|HIST1H4E|TBX20|PKMYT1|URAD|PNLIP|PYCR1|LEF1|NKX2-5|ADAMTS5|ZP4|SIX2|SIX3|AQPEP|ZFP42|RELN|CETP|IL19|CYP2A13|ENPP2|DPRX|MUC19|CYP3A4|TMEM100|FGFR3|MOCS1|MAGEC2|PID1|SPPL2C|PAK3|HUS1B|DMRT2|EPHB1|BBOX1|TBR1|TXNIP|PRG4|COX7B2|CCKBR|IRG1|DRP2|DGAT2|OTX1|SOX17|CDK5R2|CCL20|GDF10|TRH|HOXB9|TICRR|FOS|CDC25A|LIN28B|LIN28A|CHST9|HOXC10|PAX1|FGF4|IGF1|GINS1|KCNH1|LRRC15|PLA2G4D|DUXA|RPE65|LAG3|KIF14|…	http://amigo.geneontology.org/amigo/term/GO:0044237
molecular function regulator	Gene Ontology	GO:0098772	43	307	5.60551e-13	7.31189e-11	LCN1|CCL7|DTL|CDKN1C|BIRC5|SAA4|TXNIP|ITIH2|DPEP1|ANGPT4|FAM13A|PREX2|SERPINA9|CSTL1|R3HDML|KLF4|IGHEP1|CCL21|EDN3|GPC3|GDF10|UTS2|CDKN2A|VGF|CX3CL1|NPY2R|IFNL3|DEPDC1B|DEPDC1|CXCL13|FGF4|GDF15|MAPK8IP2|C1QTNF9|ADH4|LRRC15|CDC20|HN1|APOBEC1|OGN|ABCC9|A2ML1|CST5	http://amigo.geneontology.org/amigo/term/GO:0098772
negative regulation of cellular process	Gene Ontology	GO:0048523	84	965	8.24519e-13	1.04478e-10	SERPINA12|HIST1H4L|CEMIP|DMD|B4GALNT2|HIST1H4D|NUAK2|FOXG1|NMRK2|E2F7|CAT|JPH2|KIRREL2|PKDCC|LHX9|MMP9|MYOC|ITIH2|CAV2|LEF1|ADIPOQ|CAV1|LEP|CEBPA|GPAM|CRHBP|MT3|COL1A1|SERPINA9|SLC6A4|PROX1|CDC25C|VIL1|SLIT3|AURKA|LRRTM2|CCL21|BIRC5|GNAI1|CST6|TCF21|HOXA2|OSTN|WT1|IGF1|HIST1H1B|A2ML1|ADAMTS20|NAT1|LBX1|CARD17|TMPRSS6|SALL4|NPY2R|SMYD1|CASC5|PLA2G2F|HIST1H3J|HIST1H3H|FOXH1|HIST2H2AB|UHRF1|ELFN2|LA…	http://amigo.geneontology.org/amigo/term/GO:0048523
metabolic process	Gene Ontology	GO:0008152	163	2527	1.19909e-12	1.43728e-10	ELANE|TWIST2|HIST1H4E|SSX1|AGMO|TBX20|HIST1H4H|BGN|CASP12|SCRT2|ADIPOQ|ADAMTS5|TTK|COL1A1|LGSN|AMZ1|LIX1|LHX9|AQPEP|INHBA|NAALAD2|RELN|IRX6|MYT1|CA4|NPR1|CDKN2A|LIPE|TRHDE|CENPE|ENPP2|MUC13|FGFR3|SERPINB7|NKX6-1|URAD|ADAM8|GNG3|RECQL4|DMD|CLPSL1|ELAVL2|NMRK2|LPPR5|PRG4|NDRG2|ACADL|APOA2|COX7B2|CCKBR|IFNL1|EGR3|PRSS33|PRLH|SRMS|MEOX2|ZIC1|DLX4|TOP2A|HMMR|FOXJ1|KLHL30|HOXB1|LIN28B|CHST9|PAX7|GYS2|I…	http://amigo.geneontology.org/amigo/term/GO:0008152
transporter activity	Gene Ontology	GO:0005215	34	210	4.34705e-12	4.70224e-10	SLC6A4|PPBP|SLC7A3|FABP4|SLC29A4|SLCO1B7|SLC5A8|KCNA4|CAV1|CASQ2|RYR3|SLC6A19|SLCO5A1|SCN2A|GAL|TNNI3|LCN12|TRPM5|SCN11A|SLC14A2|NLGN1|PPARG|CHRNA6|HBA2|CHRNA9|KCNMB1|KCNH6|ABCB11|NPY2R|GRIN2B|ATP1A3|GABRE|SLC1A6|CACNA1B	http://amigo.geneontology.org/amigo/term/GO:0005215
DNA packaging complex	Gene Ontology	GO:0044815	14	22	5.19013e-12	5.48053e-10	HIST1H4B|HIST1H2BB|HIST1H4E|HIST1H2AL|HIST1H1T|HIST1H3C|HIST1H2AE|HIST3H2BB|HIST2H2BF|HIST2H2BE|HIST1H2AJ|NCAPG|HIST1H3H|HIST1H2BI	http://amigo.geneontology.org/amigo/term/GO:0044815
hydrolase activity	Gene Ontology	GO:0016787	60	593	6.57366e-12	6.78005e-10	ERCC6L|CPM|PDE2A|ITIH2|PKMYT1|RUNDC3A|PROL1|CLGN|EZH2|ADAM33|IQSEC3|KL|DPEP1|GNAI1|GRIN2B|PNLIPRP2|ADAMTS1|ASPA|CDKN3|MT3|CPA1|NDST4|CSRNP3|AQPEP|VIL1|CPA2|ELFN2|NRG1|KIFC1|DPP6|CST5|LIPE|S100A8|KIF18A|MRAS|CX3CL1|CMA1|SFRP1|PAX2|ADAMTS20|F10|FGFR3|SERPINB7|PLA2G4D|PCSK1N|ALPP|CCL14|CCL16|FN1|KIF23|RHBDL1|CCL7|DRP2|ADRB2|GPLD1|FAM135B|SPPL2C|STXBP5L|MMP3|MMP1	http://amigo.geneontology.org/amigo/term/GO:0016787
intrinsic component of plasma membrane	Gene Ontology	GO:0031226	39	283	1.02509e-11	1.01028e-09	RET|LIFR|APCDD1|GABRA5|TRPA1|KCNA2|CLCA4|P2RX6|IFNL1|RHBG|P2RY12|SCN2B|ABCB5|SYNDIG1|IL17REL|KISS1R|JAM2|SCN1A|ULBP1|HCAR3|CHRNA6|GRIA4|F10|TACR3|KCNJ6|KCNH2|SHISA8|SLC22A12|PIGR|ADAM8|GLRA4|ADRB3|OPRD1|NPBWR1|OXTR|HTR1D|SLC1A6|CACNG4|SCN3A	http://amigo.geneontology.org/amigo/term/GO:0031226
synaptic signaling	Gene Ontology	GO:0099536	23	95	1.24756e-11	1.20281e-09	NTSR1|LRFN2|GABRA4|GAD1|ADIPOQ|KCNA1|PTN|HRH3|TH|LRRTM2|GNAI1|RIMS2|CAPS|CHRNA4|CHRNA6|UNC13C|CADPS|MAPK8IP2|KCNMB1|GABRA3|P2RX6|NPBWR1|CARTPT	http://amigo.geneontology.org/amigo/term/GO:0099536
organic substance metabolic process	Gene Ontology	GO:0071704	160	2548	1.36228e-11	1.27839e-09	GTSE1|TGM3|SLC6A4|PCSK1|GSTA3|CASP12|TIMP4|APOC3|PAH|NKX2-3|LEF1|CAV1|ADAMTS5|LHX2|LHX9|ZP4|NTRK2|ESPL1|FGG|PYGM|CAPN9|TRHDE|STRA8|CENPF|RAMP1|CRB2|UMODL1|CCL20|KIRREL2|GATA4|MUC13|IGHEP1|ANGPT1|PNCK|GFAP|AVPR2|SLC2A4|MOCS1|CPB1|ADAMDEC1|GALR1|ANGPT4|SPPL2C|XPNPEP2|HUS1B|DMRT2|HHIPL2|ELAVL2|LPPR5|PRG4|DQX1|DPEP1|GPRASP1|PPP1R1A|NEK2|CPA2|GLDC|EGR1|SOHLH1|PRSS33|DIO1|DLX5|BMX|PLIN1|CCL24|FAM135B|F…	http://amigo.geneontology.org/amigo/term/GO:0071704
signaling receptor activity	Gene Ontology	GO:0038023	36	246	1.3836e-11	1.27839e-09	GHR|EPHA8|GABRG1|GPR19|PGLYRP3|OR1F1|GPBAR1|GABRA5|GABRA4|GABBR2|GPR146|ACVR1C|RXFP3|PROKR1|HRH3|MRGPRX3|TNFRSF9|NR3C2|CXCR5|ACTN2|CELSR3|MRAP|SCTR|PIGR|OR52E6|GPR37L1|NMUR1|ESR2|AVPR2|HTR4|KIT|ADRB2|GABRE|TAS1R3|GPR182|GLP2R	http://amigo.geneontology.org/amigo/term/GO:0038023
positive regulation of metabolic process	Gene Ontology	GO:0009893	62	642	1.74959e-11	1.58356e-09	GHR|CD36|NTSR1|KIF14|MAPK15|PRKAR2B|BMPER|HOXA2|MAFA|EDNRB|IFNB1|APOA2|AKR1C3|CEBPA|GPAM|FZD4|INHBA|CLEC3B|C4BPA|APOBEC1|SIX3|EN1|PHYHIP|GDF15|ANGPT4|ZIC3|FOXJ1|TFR2|EDN3|S100A8|HIST1H4L|LMX1A|COL1A1|MYLK2|FOXD3|LIN28A|HIST1H3B|HIST1H3C|GPC3|RET|DMRTC2|F12|ESR2|GATA4|FGF4|UHRF1|FFAR4|NKX6-1|CCL11|F2|PROK1|E2F1|KL|HN1|SCX|FOXA3|MAGEC2|OPRD1|MT3|DAZL|CSF3|HIST1H3G	http://amigo.geneontology.org/amigo/term/GO:0009893
integral component of membrane	Gene Ontology	GO:0016021	75	871	2.20762e-11	1.95816e-09	LRRC15|FXYD1|GPAM|GABRG1|KCNG3|CD34|LAG3|CD300LG|GABRA5|BMPR1B|CACNA1B|OR56A3|SLCO1B7|ADAM18|CD1A|FAM189A2|CLCA4|TMEM171|SLC35G2|IFNL1|CNIH2|FAM163B|CASQ2|SGCG|RYR3|DTL|COX7B2|UPK1A|P2RY12|KCNG1|SLC6A19|FUT7|MRGPRX3|CEACAM6|SCT|DCT|SCN4B|CADM3|NKAIN1|NPR1|ERVV-2|COL25A1|KCNJ16|ENPP2|EPHA8|RAMP1|SCTR|CHST9|HN1|ABCB11|DLL3|TSPAN7|TRPM5|TMEM100|ELFN2|GALNT15|KCNH2|SLC7A14|SYT1|SLC17A7|SLC7A10|SYNGR4…	http://amigo.geneontology.org/amigo/term/GO:0016021
intracellular non-membrane-bounded organelle	Gene Ontology	GO:0043232	57	569	3.12632e-11	2.71867e-09	MYOM2|C2CD4B|ERCC6L|TMOD1|POLQ|HSPB7|KRT31|HIST1H4I|FAM83D|KRT2|AK5|HIST2H2BE|HIST1H2AE|HIST1H2AG|S100A14|PLIN1|KNCN|TP63|STIL|CENPU|CASQ2|CLEC3B|USP44|HIST1H4D|KIF4B|ORC6|AURKA|AURKB|CDCA5|SAPCD2|WT1|BUB1|SPAG6|TNNT3|CCDC78|ORC1|GNAT3|HIST1H3F|HIST1H3H|HIST1H1A|FGF1|CCNB2|LMNB1|CNN1|TUBB4A|GTSE1|ACTL8|KIF23|DRP2|PIF1|SCN3B|KY|SYN1|EME1|INA|ATF3|KIF20A	http://amigo.geneontology.org/amigo/term/GO:0043232
protein-containing complex	Gene Ontology	GO:0032991	60	639	1.02547e-10	8.58104e-09	HBM|CDH2|HIST1H4A|TMOD1|BIRC5|SAA4|KIF26B|HBB|DQX1|GPD1|APOC3|E2F8|GABRA5|MYOG|PITX1|KCNA2|GNAI1|CACNA1H|IFNL1|DYDC1|MYBL2|ZBTB16|GABRA1|CASQ2|DAZL|CCNE1|MLXIPL|KLF4|HIST1H2AH|TERT|GLRA4|TOP2A|TGFBR3|TRDN|MCM10|GINS1|ASCL2|TNNT3|ASCL4|LEPR|HIST1H2BG|HIST3H2BB|PPP2R2C|PAX2|HIST1H1D|GATA5|HIST1H1A|HIST1H1B|C1QTNF9|E2F7|GPR37L1|GJA3|COL22A1|CDC20|CACNG6|GABRE|CEBPA|KIF20A|ATF3|COL6A6	http://amigo.geneontology.org/amigo/term/GO:0032991
protein metabolic process	Gene Ontology	GO:0019538	80	1003	1.46631e-10	1.18238e-08	HS3ST4|CPM|ACVR1C|EPHA8|CDKN1C|ADIPOQ|PAX2|CST1|ALPK3|CAT|KIF14|PROL1|CRCT1|GTSE1|MYOCD|MUC1|LEF1|CDC6|IQGAP3|TPX2|NEK2|CLEC3B|HPN|EGR1|VIP|PGA5|HIST1H3J|RELN|DLGAP5|CCL14|HIST2H4A|PI16|EEF1A2|ADM2|DOK7|ART3|KLHL13|CDC25C|GSG2|CDC25A|MMP3|CARD17|WFDC13|TMPRSS6|ADAMTS1|PADI3|PYDC1|NPHS1|ACO1|AURKA|HIST1H3H|SBK1|IGHEP1|PROX1|HIST1H1B|SGK2|KLHL38|CCL11|F2|FGG|BMP3|BRSK2|FN1|KCNH2|IFI6|UBE2S|AVPR2|F7…	http://amigo.geneontology.org/amigo/term/GO:0019538
head development	Gene Ontology	GO:0060322	24	122	1.89187e-10	1.42211e-08	SOX2|KCNA1|PTN|LHX2|DMBX1|EGR2|FGF2|RELN|SEZ6|DCT|DLX2|TGFBR2|OXTR|LMX1A|IGF2BP1|PROX1|ARNT2|PCDH9|VCX3A|BMP2|SYNGR3|COL1A1|OTP|INA	http://amigo.geneontology.org/amigo/term/GO:0060322
extracellular exosome	Gene Ontology	GO:0070062	47	445	3.40759e-10	2.51877e-08	PTH1R|HBM|TGM3|ERMN|HIST1H4B|HIST1H4H|CAT|CYSRT1|BPIFB1|PCK1|HIST1H2AI|SLC5A5|HIST2H2BE|TMEM132A|S100A14|BCAS1|ASPA|CLEC3B|CNKSR2|VIL1|SCT|RASSF9|FGG|GP2|GPLD1|HIST2H3D|COMP|MRGPRF|MFAP4|TSPAN1|HIST1H3G|HIST1H3D|HBA1|HIST1H2BI|ACTN2|FN1|CD209|IVL|PAPPA2|PRELP|ALDH2|CA4|SPHKAP|ANGPTL1|CASP14|PSCA|CD19	http://amigo.geneontology.org/amigo/term/GO:0070062
inorganic cation transmembrane transport	Gene Ontology	GO:0098662	26	150	3.80211e-10	2.76432e-08	CEMIP|TMC2|FXYD1|KCNG1|NTSR1|TMEM37|P2RY12|SCN2A|GAL|TNNI3|SCN4A|TRPM5|TRPM1|KCNJ10|KCNK16|KCNK15|TF|CNGA2|CXCL11|KCNB1|KCNH1|CXCL9|HCN2|ABCC9|HTR3A|CACNG4	http://amigo.geneontology.org/amigo/term/GO:0098662
chromosome	Gene Ontology	GO:0005694	25	140	4.76413e-10	3.40789e-08	HIST1H2BJ|POLQ|HIST1H4D|HIST1H4I|HIST1H2AM|HIST1H2AI|HIST2H2BE|SCRT2|BUB1B|MYBL2|HIST2H4A|ERCC6L|AURKA|AURKB|HIST2H2AA4|BIRC5|BUB1|CENPF|CENPE|CENPA|SALL4|DMRTC2|UHRF1|HIST1H1B|PIF1	http://amigo.geneontology.org/amigo/term/GO:0005694
transporter complex	Gene Ontology	GO:1990351	17	60	7.56085e-10	5.23944e-08	CACNA1H|SCN11A|KCNE1|CASQ2|GABRG1|GRIA4|SCN9A|GRIN2B|ATP1A3|ABCC9|SCN3B|HTR3A|GABRA5|KCNA4|SCN5A|CACNA1B|DPP6	http://amigo.geneontology.org/amigo/term/GO:1990351
nucleic acid binding	Gene Ontology	GO:0003676	49	501	1.5251e-09	1.00953e-07	DMRT1|DMRT2|ELAVL2|HIST1H4D|ONECUT2|TBR1|RCOR2|LEF1|RMI2|LHX1|HJURP|FEZF1|KLF14|EGR2|SOX11|OTX1|KIF4B|TBX10|ASCL2|ZIC2|ZIC3|ZIC1|PAX7|DNASE1L2|RNASE7|FOS|HIST1H1T|NAT1|HOXB1|LIN28B|HOXC13|HIST3H2BB|SMYD1|HIST1H1D|HIST1H3H|HIST1H2BH|PROX1|HIST1H1B|DBX2|NEUROD1|E2F2|HOXD12|PER1|TLX2|TLX3|NEIL3|OTP|DUXA|DDN	http://amigo.geneontology.org/amigo/term/GO:0003676
positive regulation of macromolecule biosynthetic process	Gene Ontology	GO:0010557	37	315	1.91323e-09	1.24782e-07	FOXJ1|TBX20|FOSB|SORBS1|MAFA|MYBL1|NKX2-3|IFNB1|APOA2|IFNL1|PITX1|NEK2|FEZF1|INHBA|EGR1|SOHLH1|SOX17|EN1|MEOX2|ONECUT2|CCL20|TOP2A|WT1|ASCL1|GBX2|HOXB1|RAMP1|TMPRSS6|LTB|FGF2|ARNT2|E2F8|SCX|ADRB2|HOXA2|HAS3|ATF3	http://amigo.geneontology.org/amigo/term/GO:0010557
ion channel activity	Gene Ontology	GO:0005216	19	85	2.32922e-09	1.49711e-07	TRDN|GPLD1|KCNJ10|CALHM1|KCNJ16|KCNG1|HCN2|GABRQ|KCNIP2|CHRNA4|CHRNA6|CLIC5|SCN3B|GRIN2D|KCNB1|TRPM3|SCN3A|GABRA3|SGK2	http://amigo.geneontology.org/amigo/term/GO:0005216
plasma membrane bounded cell projection morphogenesis	Gene Ontology	GO:0120039	20	99	4.05401e-09	2.53233e-07	SEMA3D|CDH2|FEZF1|VAX1|LHX1|EGR2|MT3|TUBB3|KIF26B|RIMS2|PAK3|POU4F1|OGN|LIFR|SEMA3G|SYT1|LRTM2|S100B|CTNNA2|NKX6-1	http://amigo.geneontology.org/amigo/term/GO:0120039
organic cyclic compound binding	Gene Ontology	GO:0097159	67	845	5.59964e-09	3.44744e-07	MKI67|HMX3|MYO3B|ELAVL3|HMGB3|RAB26|ISL2|NMRK2|HIST1H4L|EPO|HOXB9|HIST1H2AI|ARL14|HIST2H2BE|MYBL1|PYGM|APOA2|TP63|CEBPA|SLC27A6|FEZF2|CREB3L1|ADRB3|ACSM5|KIF4B|TTK|GATA5|ALAS2|HOXA4|TH|DLX5|DLX6|PGK2|NUAK2|ATOH8|NPR1|SMC1B|LHX1|LBX1|KIF18A|OASL|PPARG|DDN|DMRTC2|HAO1|ACO1|HIST1H2BM|SBK1|SRPK3|HIST1H2BK|RAX2|NEUROD1|ESR2|E2F2|E2F1|PFKFB1|TLX2|PDE2A|RDM1|HOXA6|ADRB2|STARD9|HOXA2|SCRT1|PAK7|EME1|KIF2…	http://amigo.geneontology.org/amigo/term/GO:0097159
channel activity	Gene Ontology	GO:0015267	20	102	6.32391e-09	3.79007e-07	CACNA1H|TRDN|SLC24A5|GJB2|GRIA2|KCNG1|HCN2|KCNIP2|KCNF1|PDE2A|GABRA5|KCNE1|SCN3B|MMP9|GABRE|TRPM5|GLRA4|CHRNA9|MAPK8IP2|CAV1	http://amigo.geneontology.org/amigo/term/GO:0015267
somatodendritic compartment	Gene Ontology	GO:0036477	22	125	6.5002e-09	3.84379e-07	NTSR1|BMPR1B|GABRA5|GNG13|DRP2|CACNA1B|CNKSR2|ITPKA|MAPK8IP2|NRG1|TRPM5|SLC8A2|SYNDIG1|UNC5A|LAMP5|TMEM100|TACR3|TACR1|KCNH1|TUBB4A|GLRA4|GNG3	http://amigo.geneontology.org/amigo/term/GO:0036477
identical protein binding	Gene Ontology	GO:0042802	28	202	7.1539e-09	4.12046e-07	DMRT1|DES|CLDN19|NTSR1|GPR50|SLC4A1|PYCR1|FZD4|ZBTB16|CASQ2|CNKSR2|CEACAM5|SYNDIG1|CADM3|THRSP|DAZL|HSPB6|MCM10|CALHM1|C1QTNF9|TK1|SYT9|SFRP1|SDS|PFKFB1|SYT1|KCNIP2|MMP9	http://amigo.geneontology.org/amigo/term/GO:0042802
chromatin	Gene Ontology	GO:0000785	16	62	7.39188e-09	4.20294e-07	HIST1H4B|HIST1H2BK|OIP5|HIST2H3D|TP63|HIST1H4I|HIST1H2BE|KLF4|ACTL6B|HIST1H2BB|HIST1H2AE|DLX5|HIST1H2BO|UHRF1|HIST3H2A|HIST1H1C	http://amigo.geneontology.org/amigo/term/GO:0000785
lipid binding	Gene Ontology	GO:0008289	21	115	8.05844e-09	4.52395e-07	SYT5|JPH2|C2CD4B|CETP|BPIFA2|FFAR4|GPIHBP1|RBP7|BPIFB1|CDK5R2|CYP26B1|UNC13A|ATP1A3|BPIFB6|LCN12|PIK3C2G|PLIN1|PACSIN1|S1PR1|APOA2|UNC13C	http://amigo.geneontology.org/amigo/term/GO:0008289
positive regulation of biosynthetic process	Gene Ontology	GO:0009891	38	350	8.21855e-09	4.55616e-07	UTS2|ELANE|DMRT2|IGF1|NKX2-3|NKX2-2|SIX3|MYBL2|MYOG|SPX|LHX2|NEK2|ZBTB16|SOX11|DGAT2|ALX4|KLF4|DLX5|ANXA1|TYRP1|ASCL1|GPLD1|HOXB1|FOXD3|LDB2|PPARG|PER1|EBF1|PDX1|FOXH1|SERPINB7|ACTN2|SFRP1|BMP2|CSF3|CREB3L1|HLF|FGF21	http://amigo.geneontology.org/amigo/term/GO:0009891
synapse	Gene Ontology	GO:0045202	22	128	9.52021e-09	5.14904e-07	CX3CL1|LRFN2|KCNA2|CADPS|GABRA3|KCNK9|MT3|CACNA1B|NRG1|CDH2|CAPS|POSTN|CHRNA6|UNC13A|IGF2BP1|KCNB1|GABRE|SLC8A2|ATP1A3|NETO1|GABRD|SLC18A1	http://amigo.geneontology.org/amigo/term/GO:0045202
cation binding	Gene Ontology	GO:0043169	55	641	1.11837e-08	5.97588e-07	PADI3|CDH12|DMD|COL11A1|BBOX1|PLCZ1|PADI6|ZNF695|NMRK2|HBB|PGLYRP3|CD209|MIOX|APLP1|PDE11A|DPEP1|NCAN|LHX9|MMRN1|CPA1|MAOA|MYLK|CIB3|FHL1|MGAT5B|S100A8|PGM5|TF|SLIT3|KCNIP2|ANXA1|MT3|DNASE1L3|CRYAB|APOBEC4|ITGA7|TIMP4|CHRNA6|DLL3|UNC13A|NEK2|ZDHHC22|GATA5|MEX3A|SYT9|PLA2G2F|PGLYRP2|CA3|RNFT2|CABP1|FREM1|ADH1B|HTR3A|GNAL|S100G	http://amigo.geneontology.org/amigo/term/GO:0043169
anchored component of membrane	Gene Ontology	GO:0031225	12	31	1.38197e-08	7.29647e-07	ART3|ALPP|CPM|NRN1|GPIHBP1|LYPD1|CD177|LYPD8|CA4|TECTB|GFRA2|DPEP1	http://amigo.geneontology.org/amigo/term/GO:0031225
voltage-gated channel activity	Gene Ontology	GO:0022832	13	40	1.91998e-08	9.67626e-07	DMD|KCNJ10|CALHM1|KCNJ16|TMC2|KCNJ4|KCNK16|CNGA2|TRPM5|KCNA4|KCNA2|KCNK9|CAV1	http://amigo.geneontology.org/amigo/term/GO:0022832
mitotic nuclear division	Gene Ontology	GO:0140014	13	40	1.91998e-08	9.67626e-07	DMRT1|TPX2|SPAG5|BUB1|GSG2|CENPE|NCAPH|KIF18A|KIF14|AURKA|DLGAP5|UBE2S|KIFC1	http://amigo.geneontology.org/amigo/term/GO:0140014
regulation of protein metabolic process	Gene Ontology	GO:0051246	50	571	2.83531e-08	1.41288e-06	FGFR3|TIMP4|CCL7|EPHA8|BIRC5|CD36|PCOLCE2|KIRREL2|FABP4|MAGEC2|MYOCD|RBMS3|MAGEA3|APOA2|TP63|PROX1|CST9L|ZP4|IFNB1|TTK|INHBA|C19orf80|NRG1|HTR2A|S100A7|ANGPT4|TFR2|MLXIPL|ENPP2|PYDC1|PPARG|PAX7|IL33|IGF2BP1|UHRF1|PBK|FN1|IFI6|AVPR2|IL6|CDK1|ITM2A|ITLN1|GNG3|A2ML1|EIF4E1B|CARTPT|UBE2S|UBE2C|HPN	http://amigo.geneontology.org/amigo/term/GO:0051246
DNA binding	Gene Ontology	GO:0003677	40	401	2.87566e-08	1.41706e-06	ISX|POLQ|OTX1|TIGD3|MYOCD|NKX2-2|MAFA|MYBL2|MEOX2|PITX1|NEK2|ZBTB16|HOXA6|RAD54L|EGR3|CDT1|KIF4A|HYPM|RAD51AP1|VAX1|HIST1H4E|HOXB9|CREB5|OASL|CENPA|HIST1H2BD|HIST1H2BF|LHX3|HIST1H2BC|HOXB13|HIST1H3B|MAEL|INSM1|HN1|EGR2|PIF1|RAD51|EME1|HES6|HIST2H2BF	http://amigo.geneontology.org/amigo/term/GO:0003677
positive regulation of cellular metabolic process	Gene Ontology	GO:0031325	53	630	3.71898e-08	1.79279e-06	MYH11|ELANE|ACVR1C|CDKN1C|IL12B|NTSR1|IL21|PRKAR2B|GPD1|APOC3|PITX1|MEOX2|IQGAP3|TP63|TPX2|FZD4|CD80|S1PR1|CCNE1|APOBEC1|SIX2|ALX4|C19orf80|DOK7|ZIC1|GDF15|CREB5|HAS3|WT1|EDN3|CCL11|ENPP2|CENPE|RAMP1|LIN28A|IL33|CCL14|FGF4|PROX1|FGF1|GPR37L1|NEUROD1|BMP3|CCL16|AVPR2|ACSL1|IL6|FOXA3|ADRB3|MMP9|CARTPT|DAZL|HAPLN1	http://amigo.geneontology.org/amigo/term/GO:0031325
transmembrane transporter activity	Gene Ontology	GO:0022857	26	193	4.06856e-08	1.94022e-06	TMC2|SLC6A4|GRIA2|P2RX6|KCNK9|RYR3|RHBG|RELN|TF|TRPM5|SCN4B|SLC44A4|SLC24A2|SLC15A1|COX6A2|ABCA10|SLCO1C1|KCNH2|SLC16A3|SLC2A4|SLC7A10|ANK2|CACNG6|CACNG4|SCN3A|ABCA8	http://amigo.geneontology.org/amigo/term/GO:0022857
endomembrane system	Gene Ontology	GO:0012505	53	633	4.28729e-08	2.00149e-06	AOC3|CEMIP|GRIA2|CRYAB|PKMYT1|NTSR1|PKDCC|EDNRB|GAL3ST2|CDC6|PLIN1|CNIH2|CASQ2|ESCO2|RYR3|PDE3B|CLDN8|CYP2A13|PPBP|CRISP3|SEZ6|SRD5A2|PRELP|FABP9|SYNDIG1|BRINP3|DHRS7C|IGF1|NTF4|ACACB|HMP19|SLC24A5|EPN3|CHST9|TF|GPC3|IGFBP6|CASC5|MUC13|SPPL2C|KIFC1|CYP1A1|P2RX6|POSTN|F7|SYT4|CAPN11|STX11|RDH16|PDZD2|PTPRN|VWF|INA	http://amigo.geneontology.org/amigo/term/GO:0012505
protein dimerization activity	Gene Ontology	GO:0046983	26	194	4.46538e-08	2.06291e-06	DMRT1|AOC3|MAD2L1|MGLL|NTSR1|HIST1H2AD|GAD1|CAV1|ZBTB16|CEACAM5|TBX15|TCF24|TERT|SYNDIG1|NR4A3|SLC24A2|HIST1H2BE|HIST1H3H|HIST1H2BH|ARNT2|NEUROD1|PDE2A|TYMS|ADRB3|HLF|SPPL2C	http://amigo.geneontology.org/amigo/term/GO:0046983
nuclear chromosome segregation	Gene Ontology	GO:0098813	13	44	4.92017e-08	2.24958e-06	CENPM|PLK1|CAMP|MAEL|KIF4A|SGOL1|MAST1|KIF2C|CDCA5|KIF4B|PRC1|TRIP13|CDC6	http://amigo.geneontology.org/amigo/term/GO:0098813
intracellular organelle lumen	Gene Ontology	GO:0070013	57	712	5.5738e-08	2.52243e-06	HUS1B|COL17A1|CCNE1|CLSPN|HIST1H4H|P4HA3|EZH2|MAPK10|HIST1H2AH|HIST2H2BE|SCRT2|NKX2-2|HIST1H2AD|PRC1|MYOG|CENPU|USP44|MMRN1|CFAP45|CDT1|SIX2|RAD51AP1|ALAS2|PTK6|HIST1H2BJ|TF|DLX5|NKX6-1|RAX|TOP2A|BUB1B|COL25A1|MLXIPL|TONSL|LIN28B|HIST1H2BG|HIST3H2BB|HIST1H2BB|MEIKIN|F10|HIST1H2BH|FGF1|HIST1H1C|CCNB2|CA9|GINS1|ESR2|FN1|OLR1|OTC|PDE2A|OGN|SPP1|NEU4|SORBS1|ATF3|DMGDH	http://amigo.geneontology.org/amigo/term/GO:0070013
kinase activity	Gene Ontology	GO:0016301	29	241	6.42912e-08	2.88012e-06	ELANE|MYO3B|GHR|BUB1B|PLK1|EEF1A2|NMRK2|PKMYT1|KIF14|PKDCC|TPX2|NEK2|CCNE2|ZP4|NTRK2|DOK7|BMX|ANGPT1|CENPE|ANGPT4|TGFBR3|EPHB1|CDC25A|MAS1|PROX1|CCNB2|PFKFB1|CKMT2|ADRB2	http://amigo.geneontology.org/amigo/term/GO:0016301
non-membrane-bounded organelle	Gene Ontology	GO:0043228	51	606	6.59817e-08	2.92629e-06	HUS1B|MYH11|KCNE1|HIST1H4K|FMR1NB|CEP55|CRYAB|KIF14|HIST1H1D|CLMP|MYO3B|CORO2B|ADAM18|FAM83D|CAV3|BIRC5|HIST2H4A|TNNT3|NEK2|HIST1H2BH|CCNE1|SKA1|SKA3|CTNNA2|DLX5|MEX3A|CLDN5|HSPB7|MCM10|BUB1|CENPE|SPAG5|FOXD3|CCDC78|HIST1H3G|IGF2BP1|HIST1H2BM|KIFC2|HIST1H1A|FGF1|CIDEA|JPH2|HIST1H2AB|AUNIP|PIF1|TPX2|RAD51|MT3|DST|SYN1|CYP2A6	http://amigo.geneontology.org/amigo/term/GO:0043228
cation transmembrane transporter activity	Gene Ontology	GO:0008324	20	120	6.91039e-08	3.03441e-06	CACNA1H|ACTN2|SLC24A5|SLC44A4|TMC2|FXYD1|RHBG|SLC7A10|KCNIP2|KCNJ18|TRPM1|JPH3|GAL|ABCC9|SLC22A3|SLC6A4|KCNA4|MAPK8IP2|COX6C|COX6A2	http://amigo.geneontology.org/amigo/term/GO:0008324
signaling receptor binding	Gene Ontology	GO:0005102	29	243	7.54726e-08	3.28158e-06	CHGB|D4S234E|TFF1|IL21|PF4|GABRA5|REG1A|LINGO1|S100A8|S100A7|GNAI1|GABRG1|ADM2|FIGF|IGF1|BMP8A|OASL|PMCH|IGFBP6|CCL14|LEF1|IL19|PLSCR4|ANGPT1|BMP3|SEMA3D|SEMA3G|AGR2|NETO1	http://amigo.geneontology.org/amigo/term/GO:0005102
regulation of metabolic process	Gene Ontology	GO:0019222	75	1070	8.42748e-08	3.62872e-06	HIST1H4A|CEMIP|HLF|NGB|PTK6|HMGB3|ISL2|PKMYT1|EBF2|SCRT2|MYOC|LCN1|HIST1H2AG|IFNB1|MNX1|MEOX1|HYPM|NKX2-3|VAX1|PROX1|CLEC3B|CAV2|TNXB|TCF24|NTRK2|SIX3|CYP26B1|WFDC13|VIL1|ZFP42|ISG15|AURKA|AURKB|CDK5R2|CST2|PTTG1|TERT|PI16|RAX|RAX2|ASZ1|F2|IRG1|HIST2H2AC|SLC22A3|CARD17|FOXD3|DPRX|ORC1|LDB2|CX3CL1|UMODL1|PTGIS|TCEAL5|DKK1|HIST1H1D|FGF5|UHRF1|PCSK1N|BMP2|CCL16|POU4F1|IFI6|ZNF716|AGR2|MAFA|EMX1|PDE3…	http://amigo.geneontology.org/amigo/term/GO:0019222
nucleic acid-templated transcription	Gene Ontology	GO:0097659	51	612	8.76087e-08	3.736e-06	HIF3A|FOXP3|HMX3|DTX1|HIST1H4E|HIST1H4B|HIST1H4I|CD36|HIST1H2AM|SCRT2|IFNB1|MYOG|IFNL1|LHX2|LHX3|ZBTB16|FEZF2|EGR2|MT3|ALX4|GAL|AURKB|IRX6|SPOCD1|TCF21|WT1|TFR2|ASCL1|KLHL31|ASCL2|CREB5|LBX1|DMP1|TMPRSS6|HIST1H3B|HOXC12|PAX1|LIN28A|TCEAL5|CENPU|STON1-GTF2A1L|HIST1H1C|BMP3|HOXD12|EMX1|HOXA6|APOBEC1|GPC3|SPP1|OTP|HLF	http://amigo.geneontology.org/amigo/term/GO:0097659
cellular component organization or biogenesis	Gene Ontology	GO:0071840	100	1594	1.07533e-07	4.49913e-06	KRT31|CD34|HBB|LRFN2|GSN|ADAMTS5|NTNG1|LHX9|EDN3|CDH7|SPAG6|KRT20|SPAG5|LPL|AKAP6|CNN1|FN1|SYT1|SYT4|SYT5|APOBEC1|VIT|NCAPH|NCAPG|PAK3|DMRT1|SYNM|MMP13|KCNG1|TBR1|KIF26B|EPHB1|GPBAR1|EMX1|PTN|SYT13|SCX|TNS1|TRPM1|CLDN6|FOXJ1|IGF1|TICRR|PDLIM3|SGOL1|GBP5|CMA1|NPHS1|HIST1H2BM|TYRO3|PRDM13|DDR2|PALM2-AKAP2|EPHA8|ACAN|CLDN19|MAPK15|KIF11|GABRA5|CDC6|KCNA1|NUSAP1|ERCC6L|NEURL1|FBXO43|EFNA2|FOXD1|PAX2|…	http://amigo.geneontology.org/amigo/term/GO:0071840
inorganic molecular entity transmembrane transporter activity	Gene Ontology	GO:0015318	22	152	1.44202e-07	5.94799e-06	GRIA4|GPLD1|SLC5A5|GABRA5|GABRA1|P2RX6|CACNA1H|SCN2A|TF|CAV1|CLIC5|NLGN1|KCNK16|SLC24A5|CNGA2|CHRNA9|AKAP6|SLC16A3|SLC16A6|CACNG6|CACNG1|SCN3B	http://amigo.geneontology.org/amigo/term/GO:0015318
endopeptidase activity	Gene Ontology	GO:0004175	21	139	1.44844e-07	5.94799e-06	CST5|F2|PRSS56|S100A8|TP63|ADAMTS20|MT3|CRYAB|MASP1|TMPRSS6|MMP1|CST2|CLGN|ADAM33|A2ML1|ADAM18|CST1|ITIH2|PGA5|CLCA4|WFDC6	http://amigo.geneontology.org/amigo/term/GO:0004175
cation transmembrane transport	Gene Ontology	GO:0098655	23	167	1.68984e-07	6.81315e-06	FXYD1|MMP9|KCNA4|KCNA1|CACNA1B|RHBG|P2RY12|SCN2B|RELN|COX6C|DHRS7C|NLGN1|ASIC5|SLC24A5|KCNF1|COX7A1|FGF2|MAPK8IP2|KCNH2|CXCL9|PDE2A|HTR3A|KCNK16	http://amigo.geneontology.org/amigo/term/GO:0098655
negative regulation of biological process	Gene Ontology	GO:0048519	78	1152	1.72902e-07	6.90829e-06	HIF3A|HIST1H4B|ELANE|STXBP5L|DMD|DTX1|CLSPN|HIST1H4I|HIST1H4H|CD34|TFF1|HIST1H3I|HIST1H2AM|HIST1H1D|PKDCC|EZH2|HIST1H2AD|APOBEC3B|E2F8|COL2A1|PPM1E|IFNL3|FEZF1|CCNE2|ASPM|BUB1B|CDT1|ANK2|SOX17|PROKR1|KISS1R|CST9|ISG15|HRH3|AURKB|CTHRC1|CX3CL1|AVPR2|HIST1H1C|PI16|C8orf88|PPP1R14A|TGFBR3|DHRS7C|NPR3|JAM2|ACACB|COMP|SLC24A5|CREB3L1|TMPRSS6|HIST1H3B|HIST1H3C|PER1|IGFBP1|TCEAL7|ADAMTS20|AURKA|CCL21|OL…	http://amigo.geneontology.org/amigo/term/GO:0048519
plasma membrane region	Gene Ontology	GO:0098590	20	128	1.7566e-07	6.95583e-06	ANXA1|FSD1|SLC1A1|SHISA9|KCNJ16|SLC7A5|CABP1|DPEP1|KCNA1|SPRY2|CTNNA2|GRIN2D|SLC26A9|SLC8A2|S100G|ADCYAP1R1|MUC13|CLDN5|GABRA3|CAV1	http://amigo.geneontology.org/amigo/term/GO:0098590
cellular component biogenesis	Gene Ontology	GO:0044085	41	452	2.06646e-07	8.11038e-06	DMD|POLQ|HIST1H4J|KCNG3|HIST2H2BF|HIST2H2BE|KCNA4|LEF1|MIEN1|SPTBN1|TP63|PPM1E|NEK2|HIST1H1A|NTRK2|HIST1H2BI|TACR1|NRG1|MAP1LC3C|TERT|CCL24|CLRN1|CDKN2A|TICRR|HIST1H1T|CENPE|CAPS|CASC5|HIST1H3J|APOB|CADPS|HBA2|PROX1|HIST1H2BJ|CCL11|SFRP1|MYLK|KIF23|ANK2|COL1A1|TRPM3	http://amigo.geneontology.org/amigo/term/GO:0044085
sequence-specific DNA binding	Gene Ontology	GO:0043565	22	156	2.15669e-07	8.39029e-06	DMRT2|ZNF695|TBR1|EZH2|FOXM1|MEOX2|LHX3|FEZF1|VRTN|KIF2C|SCX|WT1|MLXIPL|ASCL1|DPRX|EBF2|ARNT2|DMBX1|NEUROD1|ZNF716|TLX1|EMX1	http://amigo.geneontology.org/amigo/term/GO:0043565
cytoskeleton	Gene Ontology	GO:0005856	33	320	2.26391e-07	8.65556e-06	GSDMC|CEP55|AUNIP|GNAI1|TTK|MYH1|NEK2|WASF3|DRP2|CCNE1|SKA1|S100A9|S100A8|AURKB|SCTR|WDR62|ESPL1|FAM83D|ABRA|CENPF|DST|KIF18A|SGOL1|MAST1|DENND2A|CYP2A6|CTNNA2|KIFC1|KIF1A|DRC7|MYZAP|CDC45|INA	http://amigo.geneontology.org/amigo/term/GO:0005856
supramolecular complex	Gene Ontology	GO:0099080	24	188	3.23625e-07	1.21634e-05	KRT75|KRT38|MYOM1|ZWINT|KIF15|COL2A1|CASQ2|SKA1|KRTAP5-6|BFSP2|ASZ1|FBN2|CENPA|CFL2|CASC5|KIFC2|ACTN2|CCNB1|SPRY2|ABCC9|KY|LMOD1|INA|SPC24	http://amigo.geneontology.org/amigo/term/GO:0099080
regulation of cellular protein metabolic process	Gene Ontology	GO:0032268	38	412	3.87943e-07	1.43377e-05	DMD|CLSPN|PLK1|BGN|KIF14|MAPK10|BMPER|ADAM18|KL|CAV2|CAV3|CDC6|PPM1E|FZD4|TDPX2|ITIH5|TNXB|DSC1|RELN|S100A7|ANGPT1|MUC1|DOK7|IGF1|KLB|CDC25A|ENPP2|CRB2|PPARG|PER1|MAS1|F2|CCL14|DDR2|KIT|CD80|PPP1R14A|FGF21	http://amigo.geneontology.org/amigo/term/GO:0032268
enzyme binding	Gene Ontology	GO:0019899	33	330	4.2814e-07	1.56926e-05	TIMP4|SLC6A4|HIST1H2AM|MAGEC2|FOXM1|GCGR|MAGEA1|IQGAP3|TPX2|FZD4|DRP2|AURKA|TH|NRG1|MAP1LC3C|TCF21|NKAIN1|ARTN|FGD3|COMP|CCNA2|AKAP6|NEK2|NELL2|FGFR3|MAPK8IP2|CCNB1|ESR2|SLC26A9|CDC20|ANK2|UBE2T|SYN1	http://amigo.geneontology.org/amigo/term/GO:0019899
protein heterodimerization activity	Gene Ontology	GO:0046982	15	76	4.48264e-07	1.62955e-05	HIST1H4E|HIST1H4D|MLXIPL|CENPA|HIST1H2AM|HIST1H3C|HIST1H2BG|HIST1H4K|LIFR|HIST2H2BE|HIST1H3H|HIST1H2BO|HIST1H2BI|HIST1H2BJ|HIST1H3G	http://amigo.geneontology.org/amigo/term/GO:0046982
calcium ion binding	Gene Ontology	GO:0005509	20	137	4.63314e-07	1.67057e-05	ACTN2|PROZ|MMP12|STAB2|EFCAB1|CACNA1B|SVEP1|SLC24A2|ADAM8|PVALB|CLGN|LPL|S100A9|COMP|MME|SLIT3|F10|PROC|DST|MMP1	http://amigo.geneontology.org/amigo/term/GO:0005509
drug binding	Gene Ontology	GO:0008144	31	300	4.98534e-07	1.78306e-05	RECQL4|PLK1|NMRK2|PKDCC|TPX2|MYH6|CDK1|DDX53|CACNA1B|CYP2B6|HTR2A|PGK2|PDK4|TGFBR2|ACSM2A|ORC1|HBA1|CYP3A4|KIF18B|SRPK3|CYP1A2|SFRP1|BRSK2|ADH4|CFD|MYLK|MELK|ADRB2|ATP1A2|RAD51|MT3	http://amigo.geneontology.org/amigo/term/GO:0008144
receptor ligand activity	Gene Ontology	GO:0048018	14	66	5.05863e-07	1.7948e-05	C1QTNF9|SEMA3D|CCL16|DTL|SAA4|CCL24|IL20|PPBP|GAL|CXCL13|PF4|FGF5|NRG2|CCL23	http://amigo.geneontology.org/amigo/term/GO:0048018
positive regulation of cellular biosynthetic process	Gene Ontology	GO:0031328	30	285	5.31144e-07	1.86954e-05	DMRT1|PCK1|DTX1|RBMS3|MYBL2|MEOX1|MEOX2|NKX2-5|LHCGR|KLF15|EGR2|DGAT2|ADRB2|KLF4|ZIC2|TERT|DLX2|DAZL|RAMP1|FOXD1|PPARG|PER1|PAX1|LEF1|SFRP1|CSF3|HN1|GALR1|ATF3|PAK3	http://amigo.geneontology.org/amigo/term/GO:0031328
protein homodimerization activity	Gene Ontology	GO:0042803	19	126	5.73645e-07	2.00324e-05	AOC1|FOXP3|MYOM1|SDS|CLEC2A|CENPF|ASCL1|CRYAB|NTRK2|E2F8|ADRB2|GYS2|GPD1|TYRP1|CRYBA2|ABCD2|CAV2|CADM3|THRSP	http://amigo.geneontology.org/amigo/term/GO:0042803
negative regulation of hemopoiesis	Gene Ontology	GO:1903707	9	22	6.2808e-07	2.15933e-05	HIST1H4A|HIST1H4E|HIST1H4J|HIST1H4H|IFNB1|PGLYRP3|INHBA|TMEM178A|HIST1H4L	http://amigo.geneontology.org/amigo/term/GO:1903707
double-stranded DNA binding	Gene Ontology	GO:0003690	19	127	6.38516e-07	2.17832e-05	E2F7|ZNF716|GATA5|DLX2|FOSB|RXRG|SIX2|INSM1|SOX2|DDN|NEIL3|ZIC1|CDC45|SOX3|EBF2|PITX1|UHRF1|HES6|NKX6-1	http://amigo.geneontology.org/amigo/term/GO:0003690
polymeric cytoskeletal fiber	Gene Ontology	GO:0099513	18	116	7.7926e-07	2.63818e-05	KRT75|KRT38|JAKMIP1|ACTN2|TUBA3E|PLK1|MAST1|KRTAP4-1|ASPM|BIRC5|DES|KIF18A|KIF23|SPAG6|KIF11|AURKB|KIFC2|AURKA	http://amigo.geneontology.org/amigo/term/GO:0099513
gated channel activity	Gene Ontology	GO:0022836	13	59	8.85624e-07	2.97556e-05	DMD|KCNJ10|CALHM1|KCNK9|TMC2|CASQ2|GRIA2|KCNG1|CNGA2|TRPM5|KCNA4|KCNB1|P2RX6	http://amigo.geneontology.org/amigo/term/GO:0022836
molecular transducer activity	Gene Ontology	GO:0060089	25	217	1.04279e-06	3.43096e-05	GHR|OR1F1|GPR50|GPBAR1|GABRA5|P2RX6|LPHN3|LILRB5|PROKR1|GAL|TNFRSF9|CXCR5|NR4A3|OR52E8|HCAR3|PPARG|HTR4|FGFR3|HCAR2|ACKR1|GLRA4|GRIN2B|GALR1|ADRB3|CACNG4	http://amigo.geneontology.org/amigo/term/GO:0060089
response to peptide hormone	Gene Ontology	GO:0043434	13	60	1.04393e-06	3.43096e-05	MGARP|SIK2|CYP21A2|ADIPOQ|OTC|GNG11|GNG3|PRLH|APOC3|COL1A1|GCGR|GLP2R|GNAI1	http://amigo.geneontology.org/amigo/term/GO:0043434
neuron projection	Gene Ontology	GO:0043005	22	173	1.04437e-06	3.43096e-05	GHRH|MGARP|SLC6A4|ZWINT|GPRIN1|GABRA5|KCNA4|P2RX6|TP63|GABRG2|TRPM5|RGS8|KISS1|NLGN1|DST|CALB2|LAMP5|SRD5A2|CTNNA2|NMU|SYT4|ANK2	http://amigo.geneontology.org/amigo/term/GO:0043005
nuclear chromatin	Gene Ontology	GO:0000790	12	50	1.06849e-06	3.47944e-05	ESCO2|HIST1H2BD|HIST1H2BF|EZH2|HIST2H2BE|HIST1H2BC|HIST1H2BL|HIST1H2BM|HIST1H1C|HIST1H1A|HIST1H1B|HIST1H2AB	http://amigo.geneontology.org/amigo/term/GO:0000790
inorganic ion transmembrane transport	Gene Ontology	GO:0098660	19	132	1.07482e-06	3.47944e-05	KCNJ3|ACTN2|AKAP6|DMD|KCNJ16|KCNH2|KCNG3|TRPM3|CASQ2|KCNIP2|TF|SLC4A1|SLC30A8|GABRE|EDN3|KCNA1|FGF2|DPP6|CAV1	http://amigo.geneontology.org/amigo/term/GO:0098660
cation channel activity	Gene Ontology	GO:0005261	14	71	1.08706e-06	3.49357e-05	KCNH6|KCNJ6|FXYD1|GRIA2|KCNK15|PDE2A|JPH2|SCN2B|ADRB2|KCNJ10|ABCC9|HTR3A|TRPM5|KCNA1	http://amigo.geneontology.org/amigo/term/GO:0005261
peptidase activity, acting on L-amino acid peptides	Gene Ontology	GO:0070011	20	148	1.37092e-06	4.34173e-05	SPINK4|LCN1|PROZ|MMP13|CST1|PAPPA2|PCSK1|CRYAB|MASP1|CPB1|CRB2|CLGN|ESPL1|ADAMTS20|PTTG1|MMP1|ITIH5|DPEP1|DPP6|CST5	http://amigo.geneontology.org/amigo/term/GO:0070011
microtubule binding	Gene Ontology	GO:0008017	9	25	1.4898e-06	4.65301e-05	KIF18A|BIRC5|CRYAB|KIF23|S100A9|S100A8|FAM83D|KIFC2|KIF20A	http://amigo.geneontology.org/amigo/term/GO:0008017
microtubule cytoskeleton organization involved in mitosis	Gene Ontology	GO:1902850	8	18	1.63177e-06	5.06078e-05	NEK2|PLK1|KIF23|SPRY2|KIF11|PRC1|NDC80|SPC25	http://amigo.geneontology.org/amigo/term/GO:1902850
positive regulation of small molecule metabolic process	Gene Ontology	GO:0062013	9	26	1.94468e-06	5.96887e-05	ANXA1|ADCYAP1R1|MLXIPL|GPLD1|GPD1|MAS1|HTR2A|ABCD2|APOA1	http://amigo.geneontology.org/amigo/term/GO:0062013
phosphotransferase activity, alcohol group as acceptor	Gene Ontology	GO:0016773	26	241	1.95529e-06	5.96887e-05	CEMIP|CLSPN|NUAK2|KIF14|MAPK15|CAV3|IQGAP3|PPP1R1A|FZD4|SIK2|TTK|HTR2A|CDK5R2|TGFBR3|CENPE|FGF2|FGF1|CCNB1|SFRP1|SGK2|DDR2|CFD|MYLK|KIT|LEP|MMD	http://amigo.geneontology.org/amigo/term/GO:0016773
anterograde trans-synaptic signaling	Gene Ontology	GO:0098916	15	88	2.27578e-06	6.82552e-05	NMU|SCN2B|EGR3|SLC24A2|GRIA4|DKK1|GRIN2B|LRFN2|ADRB2|CRHBP|GABRD|GABBR2|CDC20|SYN2|SYN1	http://amigo.geneontology.org/amigo/term/GO:0098916
receptor regulator activity	Gene Ontology	GO:0030545	13	65	2.27774e-06	6.82552e-05	IFNL1|CCL7|IL17B|IL20|VGF|CCL24|PMCH|LTB|PRLH|CXCL13|CCL21|GDF15|APOA1	http://amigo.geneontology.org/amigo/term/GO:0030545
transmembrane transporter complex	Gene Ontology	GO:1902495	11	45	2.56749e-06	7.61609e-05	CLIC5|CASQ2|GRIA2|GABRG2|GABRQ|CHRNA6|GRIN2D|SCN1A|GABRE|SCN4B|KCNIP2	http://amigo.geneontology.org/amigo/term/GO:1902495
cell-cell junction	Gene Ontology	GO:0005911	15	89	2.5759e-06	7.61609e-05	AOC1|STARD10|AKAP6|ADCYAP1R1|FZD4|DES|CAV3|KIT|ABCB11|NPHS1|SORBS1|CDH2|SCN4B|CADM3|IQGAP3	http://amigo.geneontology.org/amigo/term/GO:0005911
small molecule binding	Gene Ontology	GO:0036094	39	467	2.61694e-06	7.68619e-05	AOX1|LYVE1|PTK6|HBB|FABP6|DQX1|FABP4|ARL14|PAH|BRIP1|APOA1|KIF2C|GNAI1|NCAN|ELAVL2|CYP2F1|RAD54L|ERCC6L|CYP2B6|KIF4B|AKR1C1|ABCB1|S100A8|AURKB|ALPK3|GSG2|MYLK2|ACSM2B|CAT|PBK|SGK2|UBE2C|SIK2|MYLK|KIF23|GRIN2B|UBE2S|PAK7|PAK3	http://amigo.geneontology.org/amigo/term/GO:0036094
supramolecular fiber	Gene Ontology	GO:0099512	19	142	2.842e-06	8.29229e-05	JPH2|TPX2|GTSE1|NUSAP1|KIF1A|KRTAP5-2|MYH11|SPAG5|SKA3|KIF14|KRT2|CLMP|ABCC9|ANK2|KIFC1|KRTAP5-6|CAV3|PDLIM3|AURKA	http://amigo.geneontology.org/amigo/term/GO:0099512
RNA polymerase II regulatory region DNA binding	Gene Ontology	GO:0001012	15	90	2.91095e-06	8.43794e-05	FOXJ1|CEBPA|ETV7|DMRT1|ZIC3|SOHLH1|ASCL4|TBR1|ARNT2|EN1|DDN|DLX4|NKX2-5|HES6|NKX6-1	http://amigo.geneontology.org/amigo/term/GO:0001012
antibiotic metabolic process	Gene Ontology	GO:0016999	8	20	3.05457e-06	8.79677e-05	AKR1C1|MT3|CAT|GPX3|ADH1C|ADH1A|SRD5A2|DPEP1	http://amigo.geneontology.org/amigo/term/GO:0016999
G protein-coupled receptor binding	Gene Ontology	GO:0001664	11	46	3.08352e-06	8.82284e-05	CCKBR|CCL11|KISS1|NMU|UTS2B|RAMP1|PRLH|ATP1A3|CCL21|CXCL13|GNAI1	http://amigo.geneontology.org/amigo/term/GO:0001664
carboxylic acid binding	Gene Ontology	GO:0031406	9	28	3.22179e-06	9.10105e-05	CEMIP|NCAN|CRABP2|LYVE1|ACAN|GLRA4|CYP26B1|FFAR4|ADIPOQ	http://amigo.geneontology.org/amigo/term/GO:0031406
endopeptidase inhibitor activity	Gene Ontology	GO:0004866	9	28	3.22179e-06	9.10105e-05	BIRC5|CARD17|PROL1|CST2|LEF1|SPINK4|CST6|SERPINB7|WFDC6	http://amigo.geneontology.org/amigo/term/GO:0004866
nuclear chromosome	Gene Ontology	GO:0000228	14	79	3.29118e-06	9.23821e-05	HIST1H3B|HIST1H4A|HIST1H4J|HIST1H4H|SGOL1|HIST1H2BD|CDC45|HIST1H2BF|HIST1H3D|HIST1H2BC|HIST1H3J|DLX5|NDC80|UHRF1	http://amigo.geneontology.org/amigo/term/GO:0000228
anion binding	Gene Ontology	GO:0043168	38	454	3.32744e-06	9.28125e-05	AOX1|CEMIP|RET|BRIP1|HPSE2|APOA2|P2RX6|PTN|TPX2|ADAMTS1|CACNA1B|ERCC6L|KIF4A|ITPKA|RERGL|PYGM|FMO2|ALPK3|TDO2|CETP|SOD3|ACACB|HMMR|MRAS|ACSM2B|ENTPD8|PPARG|PKMYT1|SRPK3|SGK2|SFRP1|KIF1A|FN1|CKMT2|ABCA6|PDK4|UBE2S|SYN2	http://amigo.geneontology.org/amigo/term/GO:0043168
membrane microdomain	Gene Ontology	GO:0098857	11	47	3.68809e-06	0.000102229	GJA3|LIPE|SLC6A4|KIF18A|ANK2|PDE2A|ADRB2|OPRD1|DMD|NTSR1|GNAI1	http://amigo.geneontology.org/amigo/term/GO:0098857
regulation of nucleic acid-templated transcription	Gene Ontology	GO:1903506	43	549	3.79176e-06	0.00010445	DMRT1|DTX1|NKX2-2|SSX1|HIST1H4J|HIST1H4I|HIST1H2AL|HIST1H2AE|MYOG|PDE2A|MNX1|AMH|LHX3|LHX1|KLF14|LHX9|OTX1|GALR1|EN1|KLF4|TCF24|IRX6|DLX2|OPRD1|SP8|STRA8|LMX1A|LBX1|CHRDL1|TMPRSS6|HOXC11|OTP|ASCL4|CXCL10|HIST1H3I|HIST1H1B|ETV7|E2F1|KIT|RIPPLY3|ATF3|PID1|HES6	http://amigo.geneontology.org/amigo/term/GO:1903506
carbohydrate derivative binding	Gene Ontology	GO:0097367	32	351	3.86699e-06	0.000105865	RECQL4|ELANE|CCL7|ACVR1C|MYH11|PRKAR2B|HPSE2|ADAMTS5|ACSM5|NTRK2|VIL1|PRELP|RERGL|PGK2|PYGM|PDE2A|NPR1|KCNJ10|ACACB|EPYC|MRAS|ACSM2B|PIK3C2G|MKI67|SGK2|ACSL1|KIF23|KIT|RAD51|GNAL|HAO1|KIF20A	http://amigo.geneontology.org/amigo/term/GO:0097367
negative regulation of cell death	Gene Ontology	GO:0060548	21	175	4.15755e-06	0.000113121	WT1|STIL|GPAM|HSH2D|GFRAL|PRAME|EGR3|COMP|DHRS2|ADAM8|LHX3|GABRA5|NR4A3|KLF4|SNCB|MYOCD|SOX11|CCL21|EDNRB|FGF2|TYRO3	http://amigo.geneontology.org/amigo/term/GO:0060548
transferase activity, transferring phosphorus-containing groups	Gene Ontology	GO:0016772	27	269	4.32804e-06	0.000117042	ELANE|ACSL1|ACVR1C|CDKN1C|NMRK2|RET|MAPK10|CDC6|PPP1R1A|PPM1E|SIK2|SRPK3|BMX|PGK2|PBK|CCKBR|CDC25C|CDC25A|LDB2|CXCL10|TYRO3|BMP2|KCNH2|PFKFB1|LRRC15|PDK4|CAMK2N2	http://amigo.geneontology.org/amigo/term/GO:0016772
positive regulation of nucleobase-containing compound metabolic process	Gene Ontology	GO:0045935	28	287	4.76203e-06	0.000127998	DMRT1|FOSB|TBR1|SOX2|NKX2-3|MYBL2|NKX2-5|SPX|TP63|PITX1|SOX11|ALX4|NRG1|WT1|ABRA|NR4A3|ASCL1|TMPRSS6|FOXD1|POU4F1|HOXC13|EBF1|PROX1|FGF1|CSF3|ZFP36|CREB3L1|RAD51	http://amigo.geneontology.org/amigo/term/GO:0045935
peptide binding	Gene Ontology	GO:0042277	10	39	5.08996e-06	0.000135174	GPR37L1|INHBA|NPR1|AVPR2|CD209|SSTR5|OXTR|GCGR|EDNRB|MAPK8IP2	http://amigo.geneontology.org/amigo/term/GO:0042277
inorganic cation transmembrane transporter activity	Gene Ontology	GO:0022890	17	121	5.2041e-06	0.000136846	TRDN|MMP9|KCNJ18|TMC2|CASQ2|TMEM37|CRHBP|NTSR1|SLC6A19|KCNJ10|ATP1A3|TNNI3|HTR3A|CACNG1|SCN9A|SCN3A|CAV1	http://amigo.geneontology.org/amigo/term/GO:0022890
response to antibiotic	Gene Ontology	GO:0046677	11	49	5.21467e-06	0.000136846	CYP1A1|AOC3|GJA3|ESR2|GHR|OLR1|NR4A3|GRIN2B|RBP4|TXNIP|ADCYAP1R1	http://amigo.geneontology.org/amigo/term/GO:0046677
metal ion binding	Gene Ontology	GO:0046872	48	657	6.20543e-06	0.000160942	FOXP3|MMP12|PAPL|ACAN|BIRC5|SCRT1|ADAMTS14|PAH|GNAT3|ZDHHC22|GNAI1|TP63|NEK2|ZBTB16|KLF15|SIK2|SVEP1|NEURL1|S100A9|TH|PLCZ1|DMRT1|MT1H|S100A7|TGFBR2|TOP2A|TYRP1|AURKB|ACACB|DNASE1L2|AGAP11|CALB2|COL9A1|PADI3|UNC13A|CYP3A4|MEX3A|CYP1A1|GALNT15|PAPPA2|CALML5|INSM1|HN1|S100A7A|APOBEC4|MME|FTHL17|PAK3	http://amigo.geneontology.org/amigo/term/GO:0046872
cellular component organization	Gene Ontology	GO:0016043	96	1670	6.41486e-06	0.000165407	ELANE|GJB2|COL11A1|MGARP|SLC6A4|PLK1|TBX20|ISL2|PIH1D3|ADAMTS5|LHX1|TPX2|RYR3|BUB1B|INHBA|FGG|DAZL|CENPM|ASZ1|PER1|DMRTC2|KLHL1|CXCL13|KIFC1|SYT9|AKAP6|BRSK2|TUBB4A|VIT|SPC24|DMRT1|MMP11|KCNG1|DES|APOB|GLDN|USP44|SYT13|SCT|ANGPT4|TOP2A|SMC1B|CDC25C|HIST1H2BB|NPHS1|FGF2|TYRO3|HIST3H2A|PMP2|FOXM1|KCNA2|TRIP13|RAD21L1|S1PR1|NEURL1|HIST2H2AA4|ARTN|ACACB|COMP|GPHA2|COL9A1|MAST1|UHRF1|MAEL|FAM107A|CDK1…	http://amigo.geneontology.org/amigo/term/GO:0016043
peptide receptor activity	Gene Ontology	GO:0001653	8	23	7.07673e-06	0.000181418	NPBWR1|CXCR5|AVPR2|RAMP1|SSTR2|SSTR5|MAS1|EDNRB	http://amigo.geneontology.org/amigo/term/GO:0001653
ion channel complex	Gene Ontology	GO:0034702	11	51	7.26578e-06	0.000184136	SCN11A|KCNJ6|FXYD1|GRIA2|GABRG2|GLRA4|GRIN2B|KCNG1|KCNA4|CHRNA9|DPP6	http://amigo.geneontology.org/amigo/term/GO:0034702
condensed chromosome	Gene Ontology	GO:0000793	9	32	8.02321e-06	0.000201033	CENPM|MAD2L1|HJURP|NUF2|CENPF|CENPE|BUB1B|CDCA5|BIRC5	http://amigo.geneontology.org/amigo/term/GO:0000793
positive regulation of macromolecule metabolic process	Gene Ontology	GO:0010604	40	513	8.94188e-06	0.000220318	HIF3A|HIST1H4B|CEMIP|DTX1|CDKN1C|FOSB|D4S234E|HIST1H4L|KIF14|SPRY2|MYOCD|NKX2-2|PITX1|MEOX1|ADIPOQ|IFNL1|LHX2|KLF15|SIX2|ALX4|EN1|ZIC1|DLX5|HIST1H4I|ATOH8|IGF1|BMP8A|TP63|CENPE|RAMP1|LIN28A|SALL4|PAX7|GPC3|PAX1|GPR37L1|APOBEC1|ADRB3|ACTL6B|TOP2A	http://amigo.geneontology.org/amigo/term/GO:0010604
nuclear nucleosome	Gene Ontology	GO:0000788	6	10	9.3339e-06	0.00022745	HIST1H3C|HIST1H2BG|HIST1H3J|HIST1H3H|HIST1H2BO|HIST1H2BJ	http://amigo.geneontology.org/amigo/term/GO:0000788
exocytic vesicle membrane	Gene Ontology	GO:0099501	6	10	9.3339e-06	0.00022745	SYT9|SYT1|SYNGR3|SYT4|SYN2|SYN1	http://amigo.geneontology.org/amigo/term/GO:0099501
positive regulation of transcription by RNA polymerase II	Gene Ontology	GO:0045944	22	201	9.46611e-06	0.000229411	ONECUT2|FOSB|IGF1|SIX3|ALX4|MEOX2|MT3|S1PR1|EGR1|CSRNP3|ZIC3|ZIC1|NRG1|DLX2|HOXB1|ASCL1|TMPRSS6|EBF3|PAX2|ESR2|IFNB1|GALR1	http://amigo.geneontology.org/amigo/term/GO:0045944
export from cell	Gene Ontology	GO:0140352	19	156	9.67678e-06	0.000233242	ANXA1|HN1|ACTN2|NEUROD1|CLEC6A|RAB26|FXYD1|CLEC3B|KRT20|LEP|SYT13|SSTR5|FFAR4|CDK5R2|PF4|PDX1|TYRO3|ADIPOQ|SYN1	http://amigo.geneontology.org/amigo/term/GO:0140352
secretory granule	Gene Ontology	GO:0030141	11	53	9.98647e-06	0.000239405	FIGF|CAPZA3|IGF1|ORM1|ORM2|CLEC3B|SYT1|SYT4|GAL|SLC30A8|APOA1	http://amigo.geneontology.org/amigo/term/GO:0030141
CENP-A containing chromatin organization	Gene Ontology	GO:0061641	5	5	1.00415e-05	0.00023943	HIST1H4K|HIST1H4I|HIST1H4H|CENPU|HIST1H4E	http://amigo.geneontology.org/amigo/term/GO:0061641
regulation of blood circulation	Gene Ontology	GO:1903522	10	43	1.0669e-05	0.000251687	SPX|DMD|FXYD1|RYR3|DES|ATP1A3|CX3CL1|SLC8A2|SLC1A1|CACNG6	http://amigo.geneontology.org/amigo/term/GO:1903522
serine hydrolase activity	Gene Ontology	GO:0017171	10	43	1.0669e-05	0.000251687	MMP10|CPM|MMP12|SERPINA9|KLK4|HPN|MME|F10|SPINK4|MMP11	http://amigo.geneontology.org/amigo/term/GO:0017171
growth	Gene Ontology	GO:0040007	21	188	1.13012e-05	0.000263793	CCNB2|SFRP1|BMP3|SEMA3D|GHR|ACACB|S1PR1|TNR|CRYAB|GNG4|LEPR|KIF14|PKDCC|WISP1|FOXM1|AURKA|IGF1|LEP|SOX2|HIST1H1B|DMBX1	http://amigo.geneontology.org/amigo/term/GO:0040007
regulatory region nucleic acid binding	Gene Ontology	GO:0001067	17	130	1.21913e-05	0.000283082	LHX2|VAX1|RCOR2|MLXIPL|ZNF716|ASCL1|HMX3|TBR1|PPARG|EZH2|TBX15|DMRTC2|MYBL1|MAFA|LEF1|MEOX1|HES6	http://amigo.geneontology.org/amigo/term/GO:0001067
DNA-binding transcription factor activity	Gene Ontology	GO:0003700	23	221	1.26639e-05	0.000292523	FOXP3|TRIM15|DMRT1|MYOCD|MEOX2|FEZF2|ZIC2|ZIC3|DLX6|RELN|FOXJ1|ASCL1|PTGIS|TCEAL7|LEF1|UHRF1|ESR2|E2F2|ETV7|ADAM8|KIT|FOXA3|OPRD1	http://amigo.geneontology.org/amigo/term/GO:0003700
chromatin organization involved in negative regulation of transcription	Gene Ontology	GO:0097549	7	18	1.48991e-05	0.000340605	HIST1H4A|HIST1H4K|HIST1H4J|HIST1H4I|HIST1H3C|HIST1H3D|HIST1H2AB	http://amigo.geneontology.org/amigo/term/GO:0097549
condensed nuclear chromosome	Gene Ontology	GO:0000794	7	18	1.48991e-05	0.000340605	CCNB1|NEK2|PLK1|SGOL1|RAD21L1|AURKB|NDC80	http://amigo.geneontology.org/amigo/term/GO:0000794
catalytic activity, acting on a protein	Gene Ontology	GO:0140096	38	488	1.51957e-05	0.000345604	MAPK8IP2|MMP12|CDKN1C|KIF14|MAPK15|EZH2|SOX2|GSN|TP63|CDK1|SERPINA9|ZP4|DUSP13|PTTG1|NRG2|DPP6|S100A8|ALPK3|CDKN2A|BUB1|KLHL33|TMPRSS4|ADAMTS20|ELFN2|WFDC6|PRSS1|CCNB1|BMP2|F7|ACSL1|ADAM8|CDC20|IL6|MELK|IGF1|SPOCK3|MME|UBE2T	http://amigo.geneontology.org/amigo/term/GO:0140096
macromolecule metabolic process	Gene Ontology	GO:0043170	136	2637	1.65508e-05	0.000374504	KCNE1|COL11A1|SSX1|CD36|ADAMTS20|TGM3|NKX2-2|CENPU|GSN|ADAMTS1|VRTN|LHX9|HIST1H4D|ZP4|SIX2|ADM2|CETP|CENPF|CREB5|LDB2|DMRTC2|KIRREL2|CXCL10|GATA4|FOXH1|MUC13|ELFN2|CPB1|CSF3|APOBEC1|APOBEC4|MMP11|MMP12|MMP13|NDRG2|APOA1|GPRASP1|NEK2|CCNE2|DDX53|DGAT2|CSRNP3|VIL1|GRM4|DLX5|CCL23|NKX2-5|DNASE1L2|IGF1|KLHL31|CDC25A|HOXB1|CMA1|IGFBP1|SMYD1|FGF4|HHATL|FGF2|ARNT2|KCNH2|HIST2H3D|UBE2T|ISX|POLQ|FOSB|KLHL…	http://amigo.geneontology.org/amigo/term/GO:0043170
ribonucleotide binding	Gene Ontology	GO:0032553	27	292	1.68922e-05	0.000377731	RECQL4|PLK1|RET|BMPR1B|TTK|DDX53|CACNA1B|ACSM5|ITPKA|PYGM|SMC1B|CENPE|GBP5|ABCB11|PIK3C2G|TK1|KIFC2|FGFR3|SRPK3|CKMT2|BRSK2|DDR2|ACSL1|MYLK|MELK|PIF1|PAK3	http://amigo.geneontology.org/amigo/term/GO:0032553
ion transmembrane transporter activity	Gene Ontology	GO:0015075	19	163	1.69489e-05	0.000377731	CACNA1H|AKAP6|SLC4A1|NLGN1|SLC22A12|SLC1A1|RHBG|SLC24A2|SLC22A24|KCNIP2|ABCB11|ATP1A3|TNNI3|SLC26A9|COX7A1|COX6A2|CAV3|MAPK8IP2|SLCO1C1	http://amigo.geneontology.org/amigo/term/GO:0015075
regulation of primary metabolic process	Gene Ontology	GO:0080090	83	1427	1.80436e-05	0.000398125	FOXP3|ELANE|CEMIP|PCOLCE2|APOBEC1|GHR|HIST1H4D|PYDC1|SFRP1|TBX15|PIF1|CAT|FAM83D|HOXB9|GPD1|CCL23|ADAM18|MAFA|HIST1H2AG|ITIH2|ITIH5|MEOX1|AKR1C3|IRG1|LHX2|FZD4|DMRTA2|TP63|KLF14|HIST2H2AB|FOXA3|CBX2|CDCA2|HIST1H4K|HIST2H2AC|CSRNP3|AURKB|PTTG1|EDN3|TERT|CST6|CCL24|CST4|CST5|FGG|APOB|BMP8A|KLB|KLHL31|MLXIPL|CENPE|HOXB1|DMP1|HIST1H4B|ASCL4|FOXD1|OTP|TGFBR2|NEK2|HIST1H3F|HIST1H3G|MYH6|CXCL10|GATA4|FG…	http://amigo.geneontology.org/amigo/term/GO:0080090
protein kinase activity	Gene Ontology	GO:0004672	21	195	1.86447e-05	0.000407336	TGFBR3|NPR1|SFRP1|BUB1B|CCNE2|MT3|LRRC15|PROX1|IL6|DDR2|PKDCC|EZH2|MAPK10|MYOCD|MAS1|LEP|CARTPT|CXCL10|ROS1|FGF2|IGF1	http://amigo.geneontology.org/amigo/term/GO:0004672
oxidoreductase activity	Gene Ontology	GO:0016491	16	121	1.92296e-05	0.000418055	CYP1A1|AOC3|DHRS7C|HSD17B13|ADH4|RDH16|HBB|CYP26B1|GPX3|DIO1|HAO1|IL4I1|AKR7A3|SQLE|HSD17B6|COX6A2	http://amigo.geneontology.org/amigo/term/GO:0016491
primary metabolic process	Gene Ontology	GO:0044238	119	2249	1.97886e-05	0.00042811	KCNE1|CPM|BUB1B|AGMO|HIST1H4I|TGM3|SCRT2|ROS1|GSN|PCK1|NCAN|DHRS2|PAFAH1B3|DLGAP5|CAPN9|TYRP1|STRA8|CREB5|TONSL|DLX4|UMODL1|MUC19|GATA5|ELFN2|RHBDL1|ADAMDEC1|EME1|NGB|EPB42|NDRG2|ACADL|AMH|SOX11|GLDC|OTX1|SOHLH1|CSRNP3|TTK|PRLH|AKR1C2|GRM4|CCL23|NKX2-5|PPP1R14A|ALPK3|F12|ALG1L|FGF4|CDC20B|FGF1|FAM57B|GINS1|ESR2|KCNH2|MELK|HS6ST3|PF4|VWF|UBE2T|HIST3H2A|FGF21|POLQ|ACAN|RET|GMNC|CLCA4|LGALS12|MYH6|Z…	http://amigo.geneontology.org/amigo/term/GO:0044238
heterocyclic compound binding	Gene Ontology	GO:1901363	54	813	2.1141e-05	0.000455147	DMRT1|TWIST2|DMRTC2|NR3C2|HIST1H4I|CELF3|HBB|RBMS3|RMI2|TBX10|TPX2|DMBX1|FEZF2|CYP2F1|ZFP42|CAMP|APOBEC1|CSRNP3|HYPM|KLF4|TYRO3|IRX6|SCX|SP8|NPR1|ZBED2|SMC1B|GBX2|TLX1|NAT1|HOXB1|DMP1|LIN28B|DPRX|HOXC11|HIST1H3C|CYP2A7|HIST1H3D|HIST1H2BH|ARNT2|HIST1H1C|E2F7|KLF15|DDR2|UBE2C|HOXD12|MYLK|FOXA3|SPP1|NKX3-2|HTR1D|HIST3H2BB|CEBPA|ATF3	http://amigo.geneontology.org/amigo/term/GO:1901363
protein localization	Gene Ontology	GO:0008104	33	403	2.13833e-05	0.00045814	MGARP|KPNA7|CEP55|JAKMIP1|AKAP12|KCNB1|KCNA1|CLEC5A|ACVR1C|RELN|GSG2|GSN|SYNDIG1|RIMS2|AURKA|IL36RN|ANGPT1|KIF18A|VGF|CELSR3|CAPS|HN1|PADI6|CADPS|SYNE3|CIDEA|SYT9|NEUROD1|CLEC6A|LEP|CDK1|PDX1|SCN3B	http://amigo.geneontology.org/amigo/term/GO:0008104
signaling receptor activator activity	Gene Ontology	GO:0030546	12	70	2.18595e-05	0.00046609	IL17D|PROK1|SEMA3D|CHGB|SAA2|SAA1|ARTN|IL33|UCN3|FGF4|APOA1|GDF10	http://amigo.geneontology.org/amigo/term/GO:0030546
positive regulation of gene expression	Gene Ontology	GO:0010628	28	317	2.55371e-05	0.000534232	HIF3A|SLC6A4|HIST1H4J|BMPR1B|PITX1|MEOX2|KLF15|EGR2|OTX1|ADRB2|CYP26B1|INHBA|ADM2|FOXJ1|CREB5|LMX1A|HOXC13|LEF1|HIST1H3I|CCNB1|ESR2|E2F1|PER1|CSF3|ANK2|HOXA5|ABRA|PDX1	http://amigo.geneontology.org/amigo/term/GO:0010628
transcription regulatory region sequence-specific DNA binding	Gene Ontology	GO:0000976	15	112	3.03071e-05	0.000625172	NEUROD1|ESR2|FEZF1|NR4A3|ASCL1|RXRG|FOXD1|HOXC11|PER1|KLF4|MYBL1|MAFA|NKX2-5|ATF3|ATOH8	http://amigo.geneontology.org/amigo/term/GO:0000976
negative regulation of nucleic acid-templated transcription	Gene Ontology	GO:1903507	19	171	3.09662e-05	0.000635811	NUPR1L|FOXP3|CEBPA|PRDM13|HIF3A|HIST1H4D|CENPF|MUC1|ZNF280A|SOX3|HN1|RCOR2|EZH2|SMYD1|HIST1H2AJ|HIST1H2AH|MT3|EDNRB|HIST1H1C	http://amigo.geneontology.org/amigo/term/GO:1903507
transcription by RNA polymerase II	Gene Ontology	GO:0006366	39	525	3.13573e-05	0.000640873	NR3C2|EZH2|MEOX1|MYOCD|EDNRB|SCRT2|SOX3|MAGEA1|CBX2|CAV1|FEZF2|EGR2|EGR1|SIX2|SOX17|TBX10|EN1|SCX|DLX5|TBX15|TGFBR3|WT1|IGF1|CREB5|LMX1A|TMPRSS6|SPIB|EBF3|TMEM100|STON1-GTF2A1L|LDB2|SFRP1|BMP2|E2F1|KLF15|CREB3L1|HOXA2|PID1|ATF3	http://amigo.geneontology.org/amigo/term/GO:0006366
positive regulation of nitrogen compound metabolic process	Gene Ontology	GO:0051173	36	469	3.31555e-05	0.000671436	HMX2|CLSPN|CDKN1C|ONECUT2|CELF3|RBMS3|CAV3|NKX2-5|IFNL1|FEZF2|NTRK2|FGFR3|TTK|NEURL1|S100A9|CDK5R2|CDH2|DAZL|BMP8A|TP63|TMPRSS6|HOXC13|PAX2|FGF2|FGF1|CCL11|FGG|E2F1|PAX7|KL|ADRB2|ADRB3|RAD51|FGF21|ATF3|PAK3	http://amigo.geneontology.org/amigo/term/GO:0051173
whole membrane	Gene Ontology	GO:0098805	21	204	3.42606e-05	0.000690663	ANGPT1|OLR1|CD1A|GRIA2|SYN2|SYNGR3|STAB2|NTRK2|CAV3|ADAM8|SLC30A8|EDNRB|SYT1|SORBS1|KREMEN2|MAP1LC3C|ADCYAP1R1|CAV2|GAD1|HSD17B6|SYN1	http://amigo.geneontology.org/amigo/term/GO:0098805
cis-regulatory region sequence-specific DNA binding	Gene Ontology	GO:0000987	11	62	3.61016e-05	0.000724482	NR4A3|MUC1|MEOX1|EN1|PER1|CREB3L1|HOXA2|PAX2|LEF1|E2F8|TCF21	http://amigo.geneontology.org/amigo/term/GO:0000987
macromolecule modification	Gene Ontology	GO:0043412	55	852	3.6856e-05	0.000736291	MYO3B|TRIM72|NGB|ADIPOQ|NPHS1|KLHL29|BGN|SPRY2|MUC21|FOXM1|BMPER|MYOC|NDRG2|CAV3|SPTBN1|CCL7|PPP1R1A|NEK2|KLF15|SIK2|CD80|CCNE1|ZP4|NTRK2|MYH6|HTR2A|APOA2|EDN3|NRG2|ANGPT4|PPP1R14A|FGG|LIPE|KLB|KLHL31|MLXIPL|MYLK2|RAMP1|PYDC1|PADI3|PADI6|CCNA2|FGF5|FGFR3|FGF1|F2|GALNT15|DKK1|LEP|APOBEC1|GRIN2D|PAK7|CAMK2N2|TOP2A|ALG1L	http://amigo.geneontology.org/amigo/term/GO:0043412
serine-type peptidase activity	Gene Ontology	GO:0008236	10	51	3.85227e-05	0.000759325	F2|PRSS56|MMP12|PCSK1|TMPRSS6|PRSS1|F12|MMP9|MME|WFDC6	http://amigo.geneontology.org/amigo/term/GO:0008236
regulation of trans-synaptic signaling	Gene Ontology	GO:0099177	10	51	3.85227e-05	0.000759325	PTN|SLC6A4|SLC24A2|RIMS4|OXTR|GRM4|KCNB1|SHISA9|ADIPOQ|GNAI1	http://amigo.geneontology.org/amigo/term/GO:0099177
presynapse	Gene Ontology	GO:0098793	10	51	3.85227e-05	0.000759325	SYT9|KCNJ10|NLGN1|GRIA4|NTSR1|NMU|UNC13A|RIMS4|PENK|GAD1	http://amigo.geneontology.org/amigo/term/GO:0098793
transferase activity	Gene Ontology	GO:0016740	36	474	4.06437e-05	0.000797588	ELANE|NGB|NUAK2|PKMYT1|MAPK15|BHMT2|APOA1|CCKBR|FUT7|CEBPA|GHR|CCNE2|ESCO2|CCNE1|NDST4|KLF4|HTR2A|ZSWIM2|GRM4|BMX|PYGM|CDKN2A|CDC25C|MYLK2|PPARG|KLHDC7B|PNCK|FGF2|CCNB2|KCNH1|BRSK2|UBE2C|IL6|MELK|PDK4|MT3	http://amigo.geneontology.org/amigo/term/GO:0016740
purine ribonucleoside triphosphate binding	Gene Ontology	GO:0035639	27	309	4.18643e-05	0.000817921	ACVR1C|TGFBR2|RET|MOCS1|MAPK10|DQX1|ROS1|NEK2|ITPKA|ABCB1|PBK|ABCD2|TOP2A|NPR1|ACACB|MYLK2|MRAS|ORC1|SBK1|FGFR3|SRPK3|PNCK|RAB26|KIF23|KIT|TUBB3|PAK7	http://amigo.geneontology.org/amigo/term/GO:0035639
cell cycle G1/S phase transition	Gene Ontology	GO:0044843	9	41	4.3536e-05	0.000846852	CYP1A1|CCNB1|CDKN2A|CDKN3|CCNE1|PKMYT1|KIF14|TYMS|RRM2	http://amigo.geneontology.org/amigo/term/GO:0044843
response to nitrogen compound	Gene Ontology	GO:1901698	19	176	4.42825e-05	0.000857612	KCNE1|ACVR1C|SIK2|GABRG2|ASCL1|OTC|TFF1|CRHBP|IFNB1|HN1|NEURL1|SFRP1|FOXM1|HRH3|HTR3A|CAV1|APOC3|GLP2R|FGF21	http://amigo.geneontology.org/amigo/term/GO:1901698
cell projection	Gene Ontology	GO:0042995	25	276	4.63875e-05	0.000894472	PTH1R|MGARP|CLIC5|CHL1|LHFPL5|ADCYAP1R1|DPEP1|KCNA1|TMC2|DRP2|CFAP45|KIF4A|VIL1|SNCB|CDH2|SCN11A|DPYSL5|FOS|UNC13A|NELL2|ANGPT1|ROBO2|ATP1A3|GNG3|SCN3A	http://amigo.geneontology.org/amigo/term/GO:0042995
regulation of sister chromatid segregation	Gene Ontology	GO:0033045	5	8	4.70629e-05	0.000903567	UBE2C|BUB1B|BUB1|CENPE|CDCA5	http://amigo.geneontology.org/amigo/term/GO:0033045
aminoglycan catabolic process	Gene Ontology	GO:0006026	6	15	5.46118e-05	0.0010134	HMMR|CEMIP|LYVE1|BGN|PGLYRP3|PRELP	http://amigo.geneontology.org/amigo/term/GO:0006026
potassium channel complex	Gene Ontology	GO:0034705	6	15	5.46118e-05	0.0010134	KCNG3|KCNJ16|HCN2|KCNIP2|KCNA4|KCNB1	http://amigo.geneontology.org/amigo/term/GO:0034705
cell surface	Gene Ontology	GO:0009986	15	119	5.68696e-05	0.00104703	HMMR|SCUBE3|ELANE|FGG|FZD4|BMP2|ROBO2|TFR2|SRPX|TNFRSF18|ADAM18|F10|ADCYAP1R1|DPP6|KCNA1	http://amigo.geneontology.org/amigo/term/GO:0009986
nucleoside-triphosphatase activity	Gene Ontology	GO:0017111	21	212	5.70535e-05	0.00104703	GINS2|MYH11|MYH1|IQGAP3|BRSK2|SPRY2|EEF1A2|KIF18A|TUBB3|KL|KIT|KIF15|NPR3|FAM13A|GINS1|GNGT1|IQSEC3|FGF4|KIFC2|UHRF1|KIF20A	http://amigo.geneontology.org/amigo/term/GO:0017111
nucleoside phosphate binding	Gene Ontology	GO:1901265	31	388	5.71321e-05	0.00104703	MYO3B|NGB|PLK1|BMPR1B|PCK1|GPD1|PFKFB1|DQX1|KIF2C|CDK1|POLQ|MELK|ERCC6L|ABCB5|ABCD2|ELAVL2|FMO2|ALPK3|GSG2|CENPE|MRAS|SLC27A6|UHRF1|PBK|BRSK2|DDR2|MYLK|ABCA6|TYMS|GNAL|UBE2S	http://amigo.geneontology.org/amigo/term/GO:1901265
regulation of secretion by cell	Gene Ontology	GO:1903530	15	120	6.19817e-05	0.00113123	CPLX2|NEUROD1|FN1|FFAR4|NTRK2|PYDC1|CHRNA4|SSTR5|SLC30A8|NNAT|RIMS4|FFAR3|EDN3|KCNA2|APOA2	http://amigo.geneontology.org/amigo/term/GO:1903530
nuclear lumen	Gene Ontology	GO:0031981	42	603	6.28174e-05	0.00114178	C2CD4B|ERCC6L|ELAVL2|CLSPN|HIST1H4K|HIST1H2AH|HIST2H2BE|C2orf88|HIST1H2AD|NUSAP1|CLEC3B|PTK6|CDCA2|FAM64A|SAPCD2|RAX|TOP2A|ACTL6B|TNR|MLXIPL|DMP1|VCX3A|LIN28A|HOXC11|SALL4|HIST3H2BB|CASC5|MEIKIN|GATA4|STON1-GTF2A1L|HIST1H1C|CCNB1|TERT|PPARG|IGFALS|SOX3|CDK1|SPP1|RAD51|CDC45|RAD21L1|MYT1	http://amigo.geneontology.org/amigo/term/GO:0031981
response to chemokine	Gene Ontology	GO:1990868	6	16	7.29226e-05	0.00130408	CXCL2|CXCL9|PPBP|PF4|CXCL11|CXCL13	http://amigo.geneontology.org/amigo/term/GO:1990868
oxidoreductase activity, acting on the CH-OH group of donors, NAD or NADP as acceptor	Gene Ontology	GO:0016616	6	16	7.29226e-05	0.00130408	DHRS7C|BMP2|GPD1|ADH1B|AKR1C2|AKR1C3	http://amigo.geneontology.org/amigo/term/GO:0016616
peptidase activity	Gene Ontology	GO:0008233	18	169	8.13361e-05	0.0014429	TP63|MMP13|USP44|CRYAB|CARD17|CASP14|CST2|VIL1|S100A9|PTTG1|ADAM18|UMODL1|KY|SPINK4|PROC|BIRC5|CLCA4|ESPL1	http://amigo.geneontology.org/amigo/term/GO:0008233
G protein-coupled peptide receptor activity	Gene Ontology	GO:0008528	7	25	8.46326e-05	0.00148947	GPR37L1|NMUR1|NPR1|SSTR1|GALR1|OPRD1|GCGR	http://amigo.geneontology.org/amigo/term/GO:0008528
positive regulation of RNA biosynthetic process	Gene Ontology	GO:1902680	23	254	9.18325e-05	0.00159716	NKX2-2|MAFA|MYBL2|MEOX1|MEOX2|LHX3|FEZF2|CD80|S1PR1|OTX1|SOHLH1|SOX17|TFR2|IGF1|PAX7|DDN|FOXH1|E2F7|E2F8|HN1|ADRB2|PID1|HLF	http://amigo.geneontology.org/amigo/term/GO:1902680
cytoskeletal protein binding	Gene Ontology	GO:0008092	16	140	9.41171e-05	0.00163051	TNNT1|DPYSL5|DMD|DST|ANLN|CRYAB|KIF23|CAV3|KIF14|MAST1|GTSE1|S100A9|SNCB|XIRP1|MAPK8IP2|FAM83D	http://amigo.geneontology.org/amigo/term/GO:0008092
membrane raft	Gene Ontology	GO:0045121	9	46	9.48168e-05	0.00163624	TGFBR2|AKAP6|SDPR|TNR|PTGIS|PDE2A|P2RY12|EDNRB|SCN5A	http://amigo.geneontology.org/amigo/term/GO:0045121
hormone binding	Gene Ontology	GO:0042562	6	17	9.58126e-05	0.00164701	LHCGR|ESR2|CRHBP|CHRNA4|GALR1|ATP1A2	http://amigo.geneontology.org/amigo/term/GO:0042562
regulation of growth	Gene Ontology	GO:0040008	14	111	9.87341e-05	0.00169068	AKAP6|SLC44A4|SEMA3G|SLC6A4|PAPPA2|WISP1|CRYAB|CCNB1|MAEL|VIL1|HPN|NELL2|LEF1|FGF2	http://amigo.geneontology.org/amigo/term/GO:0040008
macromolecule localization	Gene Ontology	GO:0033036	33	440	0.000103586	0.00175154	KCNE1|CD34|CD36|FAM83D|PKDCC|GPLD1|PNLIP|RTP3|GSN|CLEC5A|APOB|INHBA|LCN12|CX3CL1|FGG|ANXA1|KISS1R|IL36RN|CETP|HCAR2|IGF2BP1|APOLD1|SLCO1C1|ACTN2|ANGPT1|CLEC6A|BRSK2|FN1|POSTN|CDK1|GNGT1|NETO1|ABCA9	http://amigo.geneontology.org/amigo/term/GO:0033036
beta-catenin-TCF complex assembly	Gene Ontology	GO:1904837	5	10	0.000103716	0.00175154	HIST1H4K|HIST1H4L|HIST1H4I|TERT|HIST2H4A	http://amigo.geneontology.org/amigo/term/GO:1904837
ligand-gated channel activity	Gene Ontology	GO:0022834	7	26	0.000104263	0.00175154	DMD|KCNH2|GABRG2|RYR3|NLGN1|JPH2|CHRNA6	http://amigo.geneontology.org/amigo/term/GO:0022834
positive regulation of supramolecular fiber organization	Gene Ontology	GO:1902905	7	26	0.000104263	0.00175154	ANKRD53|PPM1E|SFRP1|ACTN2|CSF3|PROX1|GSN	http://amigo.geneontology.org/amigo/term/GO:1902905
postsynaptic membrane	Gene Ontology	GO:0045211	8	36	0.000107212	0.00179428	KCNJ4|D4S234E|GABRG1|GABRQ|CHRNA6|HTR3A|GABRD|CHRNA9	http://amigo.geneontology.org/amigo/term/GO:0045211
transmembrane signaling receptor activity	Gene Ontology	GO:0004888	21	223	0.00011014	0.00183636	CCKBR|NPR1|LILRB5|LPHN3|NLGN1|TGFBR3|GPR17|MRGPRX2|NTSR1|SSTR1|CCR8|BMPR1B|OR56A3|TNFRSF9|GFRA2|ADAM18|HTR2A|ADCYAP1R1|OR5P2|GABRG1|MAS1L	http://amigo.geneontology.org/amigo/term/GO:0004888
organelle lumen	Gene Ontology	GO:0043233	47	725	0.000119114	0.00197854	ELAVL2|PTK6|HIST1H4K|BIRC5|PCSK1|CRYAB|PKMYT1|CAT|HIST1H2BL|RRM2|BUB1B|BRIP1|CBX2|UHRF1|NEK2|FOS|ALAS2|MIEN1|VIL1|TP53AIP1|TBX15|PPP1R12B|TF|DLX5|CDCA8|TERT|CST6|THRSP|CENPM|IGF1|TNR|CDC25A|TONSL|MRAP|CFL2|HIST1H3D|MUC5AC|LEF1|HIST1H2BO|PGA5|GINS1|ETV7|OLR1|COL22A1|HLF|CCNO|SPC24	http://amigo.geneontology.org/amigo/term/GO:0043233
collagen-containing extracellular matrix	Gene Ontology	GO:0062023	6	18	0.000124066	0.00204547	PTN|IGF1|COL11A1|FREM1|COL2A1|COL17A1	http://amigo.geneontology.org/amigo/term/GO:0062023
neurotransmitter receptor activity	Gene Ontology	GO:0030594	6	18	0.000124066	0.00204547	NLGN1|GABRG2|GLRA4|HTR4|HTR2A|GABRA4	http://amigo.geneontology.org/amigo/term/GO:0030594
transcription regulatory region DNA binding	Gene Ontology	GO:0044212	16	144	0.000126867	0.00208391	HMX3|ONECUT2|FOSB|CEBPA|SIX2|HOXC11|PPARG|SPP1|DMRT2|MAFA|DLX5|NKX2-5|MYOG|MEOX1|HES6|ATOH8	http://amigo.geneontology.org/amigo/term/GO:0044212
transcription regulator activity	Gene Ontology	GO:0140110	24	278	0.000128661	0.00210558	DTX1|VAX1|FOXJ1|MYOCD|SOX3|MYBL2|CSRNP3|SIM2|FEZF1|HOXA5|DSC1|MYT1|WT1|CDKN2A|AMH|TONSL|ASCL4|FOXD4L1|GATA5|GBX2|NKX6-1|NEUROD1|INSM1|FOXA3	http://amigo.geneontology.org/amigo/term/GO:0140110
positive regulation of nucleic acid-templated transcription	Gene Ontology	GO:1903508	22	244	0.00013652	0.00221783	PCK1|CDKN1C|TBX20|PF4|MYBL1|EGR2|SOHLH1|SIX3|GAL|ZIC2|ZIC3|SCX|IGF1|POU4F1|DDN|PAX2|LEF1|GATA5|FGF1|IL6|SPP1|TOP2A	http://amigo.geneontology.org/amigo/term/GO:1903508
cell junction	Gene Ontology	GO:0030054	18	177	0.000138761	0.00224601	ACTN2|C2CD4B|SYNM|KCNJ4|SYNDIG1|PGM5|SLC17A7|HN1|NEURL1|TIGIT|CLDN11|GABRG2|RIMS4|CAV1|CAV2|SHISA9|RIMS2|GSN	http://amigo.geneontology.org/amigo/term/GO:0030054
digestive system development	Gene Ontology	GO:0055123	9	49	0.000144893	0.00233672	SFRP1|PTK6|CDKN1C|ALX4|HOXA5|NKX3-2|OXTR|NKX2-2|PDX1	http://amigo.geneontology.org/amigo/term/GO:0055123
protein-containing complex binding	Gene Ontology	GO:0044877	13	102	0.000157364	0.00251953	MYH11|SLC6A4|COMP|CDC20|ANK2|ABI3BP|NRG1|CORO2B|CDC20B|GFAP|APOA1|CTNNA2|GNAI1	http://amigo.geneontology.org/amigo/term/GO:0044877
cellular protein metabolic process	Gene Ontology	GO:0044267	57	949	0.000163308	0.00259595	SERPINA12|HIST1H4B|TIMP4|HIST1H4E|KISS1R|HIST1H4I|KLHL29|ALPK3|BGN|MOCS1|MAGEC2|NNAT|SOX2|KIT|GPRC5A|ROS1|S100A8|B3GALT1|PPP1R1A|CEBPA|APOB|KLF15|CCNE2|MT3|EPHA8|TNXB|TRIML2|RELN|NRG2|CST6|DAZL|NPR1|ART3|EPHB1|LIPE|FBXO40|FBXO43|CDC25C|CKS2|PYDC1|CRB2|KLHL4|PKMYT1|MAS1|KLHDC7B|MUC13|HIST1H1C|CCNB1|PROK1|FN1|IFI6|INSM1|PCK1|GNG3|CARTPT|CDC20B|HPN	http://amigo.geneontology.org/amigo/term/GO:0044267
Ras guanyl-nucleotide exchange factor activity	Gene Ontology	GO:0005088	8	39	0.000173745	0.00274221	KLB|GRIN2B|NRG1|FGF5|FGF4|FGFR3|FGF1|ARTN	http://amigo.geneontology.org/amigo/term/GO:0005088
proteolysis	Gene Ontology	GO:0006508	29	378	0.000185091	0.00290063	SERPINA12|MAD2L1|TRIM72|BIRC5|RET|CASP12|CASP14|ADAMTS19|TP63|TPSG1|CST9|NAALAD2|C19orf80|DPP6|PRSS56|F2|GPC3|IL33|ADAMTS20|PGA5|BRSK2|PCSK1N|SFRP1|PROZ|OLR1|MASP1|ADAM8|MMP9|KY	http://amigo.geneontology.org/amigo/term/GO:0006508
trans-synaptic signaling	Gene Ontology	GO:0099537	13	104	0.000187259	0.00292427	CPLX2|TNR|EGR2|SYT13|CRHBP|PMCH|JPH3|SNCB|RELN|GRM4|HTR1E|GABBR2|S100B	http://amigo.geneontology.org/amigo/term/GO:0099537
negative regulation of cellular protein metabolic process	Gene Ontology	GO:0032269	16	150	0.000194549	0.00301687	FOXP3|PPM1E|MAD2L1|IFI6|CST9L|PYDC1|PID1|TIMP4|ISG15|MMP9|MAGEA3|CAMK2N2|NDRG2|CST1|PI16|PBK	http://amigo.geneontology.org/amigo/term/GO:0032269
nucleosome	Gene Ontology	GO:0000786	5	12	0.000201871	0.0031195	HIST1H4K|HIST1H4H|HIST2H2AB|HIST1H3G|HIST1H3D	http://amigo.geneontology.org/amigo/term/GO:0000786
response to growth factor	Gene Ontology	GO:0070848	15	135	0.000203553	0.00312725	FIGF|CAV1|ONECUT2|ASCL1|NTRK2|LRG1|TNMD|GPC3|MYOCD|TH|FGF5|FGF4|FGFR3|FGF1|FGF21	http://amigo.geneontology.org/amigo/term/GO:0070848
cell body	Gene Ontology	GO:0044297	11	77	0.000203782	0.00312725	RDH5|KCNH1|UNC5A|GRIA4|IGF1|AURKA|TH|SRD5A2|SLC8A2|GFAP|SEZ6L	http://amigo.geneontology.org/amigo/term/GO:0044297
monovalent inorganic cation transmembrane transporter activity	Gene Ontology	GO:0015077	10	64	0.000205552	0.00314353	SGK2|FXYD1|SLC24A5|SLC36A2|KCNF1|GAL|HTR3A|SLC1A6|KCNB1|KCNK9	http://amigo.geneontology.org/amigo/term/GO:0015077
cellular response to growth factor stimulus	Gene Ontology	GO:0071363	16	151	0.000208445	0.00317682	FIGF|PTN|FOXH1|BMP2|CIDEA|OPRD1|FBN2|PDE2A|HN1|SPRY2|TMEM100|BMPER|HTR3A|FGF4|COL2A1|CAV1	http://amigo.geneontology.org/amigo/term/GO:0071363
digestive tract development	Gene Ontology	GO:0048565	9	52	0.000215322	0.00327039	ASCL1|SIX2|KIT|TYMS|CLMP|ZIC3|GATA4|SOX17|NKX3-2	http://amigo.geneontology.org/amigo/term/GO:0048565
carbohydrate derivative metabolic process	Gene Ontology	GO:1901135	22	253	0.000218936	0.00331392	HS3ST4|COL11A1|AMPD1|CEMIP|KCNE1|PDE11A|MT3|NDST4|ITM2A|TH|CCL21|HMMR|IGF1|MLXIPL|ACSM2A|PID1|TK1|MUC5AC|SLC2A4|FUT7|APOBEC1|NEU4	http://amigo.geneontology.org/amigo/term/GO:1901135
G protein-coupled receptor activity	Gene Ontology	GO:0004930	14	121	0.000224252	0.00338285	GPR146|SFRP1|AVPR2|CELSR3|P2RY12|HCAR3|OR1F1|OR2L13|SSTR5|OR2L3|HTR1E|CCR8|GCGR|GPR115	http://amigo.geneontology.org/amigo/term/GO:0004930
negative regulation of chromosome separation	Gene Ontology	GO:1905819	4	6	0.000240492	0.00360332	TTK|CENPF|CCNB1|BUB1	http://amigo.geneontology.org/amigo/term/GO:1905819
positive regulation of transcription, DNA-templated	Gene Ontology	GO:0045893	23	273	0.000243417	0.00362266	HIF3A|CDKN1C|MAFA|MYBL2|MEOX2|FOXH1|FZD4|EGR2|SOHLH1|GAL|DLX5|TERT|TCF21|DLX2|ATOH8|TFR2|PITX1|EBF3|MCIDAS|FGF4|CREB3L1|SPP1|HLF	http://amigo.geneontology.org/amigo/term/GO:0045893
secretory vesicle	Gene Ontology	GO:0099503	11	79	0.000248983	0.00369311	FIGF|PCSK1N|MMRN1|PCSK1|SLC7A11|CRHBP|STX11|SVOP|ADAM8|TH|PF4	http://amigo.geneontology.org/amigo/term/GO:0099503
mucopolysaccharide metabolic process	Gene Ontology	GO:1903510	6	21	0.000249948	0.00369506	HMMR|ITIH2|NDST4|ANGPT1|FGF2|HAS3	http://amigo.geneontology.org/amigo/term/GO:1903510
supramolecular fiber organization	Gene Ontology	GO:0097435	15	139	0.000271437	0.00396329	CAPZA3|KISS1R|PPM1E|TRDN|COL11A1|ACTN2|DDR2|KRT20|PYDC1|MAST1|SORBS1|COL1A1|MYOC|CLRN1|GSN	http://amigo.geneontology.org/amigo/term/GO:0097435
trabecula formation	Gene Ontology	GO:0060343	5	13	0.000271666	0.00396329	TGFBR3|ADAMTS1|FBN2|CAV3|NKX2-5	http://amigo.geneontology.org/amigo/term/GO:0060343
regulation of transforming growth factor beta receptor signaling pathway	Gene Ontology	GO:0017015	5	13	0.000271666	0.00396329	ADAM18|ONECUT2|FBN2|TGFBR2|CIDEA	http://amigo.geneontology.org/amigo/term/GO:0017015
Golgi lumen	Gene Ontology	GO:0005796	5	13	0.000271666	0.00396329	NCAN|MUC1|PROC|SOD3|MUC19	http://amigo.geneontology.org/amigo/term/GO:0005796
response to organonitrogen compound	Gene Ontology	GO:0010243	17	173	0.000303592	0.00441452	ANXA1|TH|ASCL1|CCNA2|RAD51|TACR3|OTC|CDO1|ADRB2|UMODL1|TACR1|MAS1|HTR3A|P2RX6|RGS8|CDC6|PENK	http://amigo.geneontology.org/amigo/term/GO:0010243
hormone activity	Gene Ontology	GO:0005179	6	22	0.000308966	0.00447798	UTS2|PYY|C1QTNF9|OSTN|EDN2|PENK	http://amigo.geneontology.org/amigo/term/GO:0005179
purine nucleotide binding	Gene Ontology	GO:0017076	25	315	0.000311384	0.00449378	NGB|PLK1|NMRK2|PRKAR2B|DQX1|ROS1|MYH6|ACSM5|KIF4B|TTK|ABCD2|PGK2|TOP2A|GSG2|KIF18A|MRAS|TUBB3|PIK3C2G|ENTPD8|KIFC2|PNCK|CFD|HCN2|STARD9|ATP1A2	http://amigo.geneontology.org/amigo/term/GO:0017076
tissue homeostasis	Gene Ontology	GO:0001894	9	55	0.000312082	0.00449378	PTH1R|LCN1|PRLH|ADAM8|ADRB2|CARTPT|CLRN1|MUC13|ZG16B	http://amigo.geneontology.org/amigo/term/GO:0001894
gene expression	Gene Ontology	GO:0010467	63	1111	0.000331211	0.00475379	DMRT2|CPM|HIST1H4E|NR3C2|PLK1|TBX20|CRYAB|HIST1H2AL|HIST1H2AI|HIST1H2AH|BRIP1|HIST1H2AD|MYOG|PITX1|MNX1|GSN|SPX|LHX1|INHBA|CLEC3B|SOX11|APOBEC1|SCRT1|SOX17|CDKN1C|GAL|C19orf80|FGF1|HIST1H4J|NKX2-5|DLX2|ATOH8|TGFBR3|FOXJ1|HIST1H1B|ACACB|TSHZ2|NAT1|RXRG|STON1-GTF2A1L|LIN28B|DPRX|SPIB|HOXC13|HIST2H3D|TCEAL7|SMYD1|HIST1H3D|SLC26A9|TRIP13|HIST2H2AB|ARNT2|CIDEA|F2|NEUROD1|AVPR2|ZNF280A|HOXA6|RIPPLY3|CD…	http://amigo.geneontology.org/amigo/term/GO:0010467
neuronal cell body	Gene Ontology	GO:0043025	11	82	0.000332478	0.00475658	KCNH1|ESR2|KCNJ4|CACNA1B|ASCL1|CNTNAP2|HPN|SEZ6|PTPRN|PENK|SCN3A	http://amigo.geneontology.org/amigo/term/GO:0043025
hydrolase activity, acting on acid anhydrides, in phosphorus-containing anhydrides	Gene Ontology	GO:0016818	20	227	0.000353991	0.00503189	MYH11|MYH1|MYH6|CCL7|RAD54L|TUBB4A|ENPP2|RET|DOCK11|GRIN2B|GNG3|NPR3|KIF4A|CCL23|GCGR|IQSEC3|RGS8|ALDH1A1|KIF2C|ARTN	http://amigo.geneontology.org/amigo/term/GO:0016818
RNA polymerase II regulatory region sequence-specific DNA binding	Gene Ontology	GO:0000977	11	83	0.000365071	0.00514424	E2F7|DMRT2|FEZF1|ETV7|ONECUT2|FOSB|TBR1|HOXA5|HOXA2|ZIC1|PDX1	http://amigo.geneontology.org/amigo/term/GO:0000977
G protein-coupled neurotransmitter receptor activity	Gene Ontology	GO:0099528	4	7	0.000367694	0.00514424	HTR1D|GABBR2|HTR2A|HTR4	http://amigo.geneontology.org/amigo/term/GO:0099528
regulation of cardiocyte differentiation	Gene Ontology	GO:1905207	4	7	0.000367694	0.00514424	NRG1|CAV3|MYOCD|DKK1	http://amigo.geneontology.org/amigo/term/GO:1905207
neuroblast proliferation	Gene Ontology	GO:0007405	4	7	0.000367694	0.00514424	DCT|ARTN|LEF1|SIX3	http://amigo.geneontology.org/amigo/term/GO:0007405
metallopeptidase activity	Gene Ontology	GO:0008237	7	33	0.000369472	0.00515285	MMP10|CPA1|CPB1|NAALAD2|ADAMTS14|ADAM18|MMP27	http://amigo.geneontology.org/amigo/term/GO:0008237
nuclear chromosome, telomeric region	Gene Ontology	GO:0000784	6	23	0.000378368	0.00526039	HIST1H3I|HIST1H4L|CDK1|HIST1H3J|HIST1H3H|TERT	http://amigo.geneontology.org/amigo/term/GO:0000784
response to peptide	Gene Ontology	GO:1901652	10	70	0.000391774	0.00542974	ANXA1|CCNA2|EGR1|TFF1|PDE3B|HN1|PRLH|SORBS1|SRD5A2|CAV2	http://amigo.geneontology.org/amigo/term/GO:1901652
side of membrane	Gene Ontology	GO:0098552	9	57	0.000394661	0.00545272	ANXA1|STAB2|CD80|CD36|IL6|CEACAM5|GNG3|SPPL2C|CD19	http://amigo.geneontology.org/amigo/term/GO:0098552
cellular response to organonitrogen compound	Gene Ontology	GO:0071417	11	84	0.000400306	0.00551352	SFRP1|KLF15|CASQ2|RYR3|COL1A1|D4S234E|PRKAR2B|GNG2|IGFBP1|HTR3A|GCGR	http://amigo.geneontology.org/amigo/term/GO:0071417
mitotic cell cycle process	Gene Ontology	GO:1903047	13	115	0.000453853	0.00621138	CEP55|NEK2|TICRR|CCNE1|TTK|CDK1|AURKA|AURKB|NCAPH|KIFC1|MYBL2|CDCA8|KIF20A	http://amigo.geneontology.org/amigo/term/GO:1903047
carbohydrate transmembrane transport	Gene Ontology	GO:0034219	6	24	0.000459376	0.00621138	OSTN|AQP7|LEP|ITLN1|SORBS1|ADIPOQ	http://amigo.geneontology.org/amigo/term/GO:0034219
lipid phosphorylation	Gene Ontology	GO:0046834	6	24	0.000459376	0.00621138	CCKBR|EPHA8|CD80|KLF4|NRG1|CD19	http://amigo.geneontology.org/amigo/term/GO:0046834
protein-DNA complex	Gene Ontology	GO:0032993	6	24	0.000459376	0.00621138	HIST3H2BB|HIST2H2BF|HIST1H2AJ|HIST1H3H|HIST2H2AB|HIST1H2AB	http://amigo.geneontology.org/amigo/term/GO:0032993
chromosome, telomeric region	Gene Ontology	GO:0000781	6	24	0.000459376	0.00621138	HIST1H4B|HIST1H4J|HIST1H4I|HIST1H4H|HIST1H3H|HIST2H4A	http://amigo.geneontology.org/amigo/term/GO:0000781
neural crest cell differentiation	Gene Ontology	GO:0014033	5	15	0.000464408	0.00625699	GBX2|EDN3|SFRP1|EDNRB|RET	http://amigo.geneontology.org/amigo/term/GO:0014033
apical plasma membrane	Gene Ontology	GO:0016324	8	46	0.000465571	0.00625699	MUC1|SLC7A5|SLC1A1|HN1|HPN|SLC26A9|MUC13|DPEP1	http://amigo.geneontology.org/amigo/term/GO:0016324
positive regulation of cellular protein metabolic process	Gene Ontology	GO:0032270	22	269	0.000476869	0.00637023	PLK1|MAPK10|RBMS3|CAV2|GSN|MT3|FGF2|HTR2A|DOK7|CDK5R2|GDF15|FGG|KISS1|BMP8A|HPN|PROX1|HIST1H1B|ANGPT1|BMP3|CSF3|IL6|PAK3	http://amigo.geneontology.org/amigo/term/GO:0032270
anion transmembrane transport	Gene Ontology	GO:0098656	9	59	0.000494437	0.00656536	SLC6A4|GABRQ|SLC7A5|SLC7A10|SLC22A24|SLC22A12|SLCO5A1|SLC16A6|SLC1A1	http://amigo.geneontology.org/amigo/term/GO:0098656
contractile fiber	Gene Ontology	GO:0043292	7	35	0.000503842	0.00665041	TIMP4|MYH6|MYLK2|KCNE1|SYNM|SCN3B|SPTBN1	http://amigo.geneontology.org/amigo/term/GO:0043292
negative regulation of apoptotic process	Gene Ontology	GO:0043066	18	199	0.000512822	0.00674886	ANXA1|FGG|SFRP1|AURKB|PLK1|COMP|ASCL1|CAT|KIF14|CDK1|PAX7|KLF4|AURKA|CHL1|MAGEA3|EDNRB|CX3CL1|DPEP1	http://amigo.geneontology.org/amigo/term/GO:0043066
zinc ion binding	Gene Ontology	GO:0008270	17	182	0.000518516	0.00680361	AOC1|WT1|FBXO40|MMP12|NR4A3|CFD|LMX1A|ZBBX|ADAMDEC1|ADAMTS19|ADAMTS14|APOBEC4|MME|ZDHHC22|ENPP2|DUSP1|SLC30A8	http://amigo.geneontology.org/amigo/term/GO:0008270
receptor complex	Gene Ontology	GO:0043235	8	47	0.000528678	0.00691648	GRIA2|GABRG2|PLXNA4|CHRNA6|GABRA5|ADCYAP1R1|CACNG4|SHISA9	http://amigo.geneontology.org/amigo/term/GO:0043235
regulation of extrinsic apoptotic signaling pathway in absence of ligand	Gene Ontology	GO:2001239	4	8	0.00053664	0.007	CX3CL1|GFRAL|PF4|RET	http://amigo.geneontology.org/amigo/term/GO:2001239
negative regulation of cell adhesion	Gene Ontology	GO:0007162	9	60	0.000551581	0.00717378	FOXP3|BMP2|IFNL1|IFNB1|ADAMDEC1|KLF4|MUC21|LAG3|DTX1	http://amigo.geneontology.org/amigo/term/GO:0007162
negative regulation of RNA metabolic process	Gene Ontology	GO:0051253	27	368	0.000574113	0.00744501	VAX1|HIST1H4K|HIST1H4J|FOSB|CD36|RCOR2|HIST1H2AJ|CAV1|SIM2|HIST1H4E|EGR1|SCX|AURKB|NRG1|HIST1H4I|TBX15|LHX1|ASCL1|TMPRSS6|SALL4|HIST2H3D|HIST1H3F|SMYD1|PRDM13|ESR2|BMP2|ETV7	http://amigo.geneontology.org/amigo/term/GO:0051253
regulation of cell growth	Gene Ontology	GO:0001558	10	74	0.00058111	0.00748863	CRABP2|TNR|MT3|WISP1|CRYAB|SOX17|KIF14|PPARG|GNG4|ADAM18	http://amigo.geneontology.org/amigo/term/GO:0001558
plasma membrane bounded cell projection	Gene Ontology	GO:0120025	21	255	0.000582743	0.00748863	CNKSR2|AOC3|GHRH|ANGPT1|KCNJ4|KCNA2|CACNA1B|EPHA8|SCN2A|KIF4A|GNG13|LAMP5|LPL|TH|SYT1|GABRA5|PTPRN|KCNB1|NLGN1|PACSIN1|DST	http://amigo.geneontology.org/amigo/term/GO:0120025
peptidase regulator activity	Gene Ontology	GO:0061134	7	36	0.000584231	0.00748863	PCSK1N|WFDC13|CST9|SPOCK3|CST6|SERPINB7|WFDC6	http://amigo.geneontology.org/amigo/term/GO:0061134
ligand-gated ion channel activity	Gene Ontology	GO:0015276	7	36	0.000584231	0.00748863	JPH2|NLGN1|ASIC5|CHRNA4|GABRA5|GABRE|GABRD	http://amigo.geneontology.org/amigo/term/GO:0015276
skin epidermis development	Gene Ontology	GO:0098773	5	16	0.000592469	0.00757234	HOXC13|LDB2|LHX2|DNASE1L2|DKK1	http://amigo.geneontology.org/amigo/term/GO:0098773
passive transmembrane transporter activity	Gene Ontology	GO:0022803	12	104	0.000628063	0.00800419	GJA3|DMD|SGK2|GABRQ|NTSR1|JPH3|ADRB2|CLIC5|TNNI3|SCN4A|KCNA4|HPN	http://amigo.geneontology.org/amigo/term/GO:0022803
ligand-gated cation channel activity	Gene Ontology	GO:0099094	6	26	0.000661426	0.00835734	KCNJ18|NLGN1|HCN2|JPH3|CASQ2|MAPK8IP2	http://amigo.geneontology.org/amigo/term/GO:0099094
circadian rhythm	Gene Ontology	GO:0007623	7	37	0.000674478	0.00846463	UTS2|PROK1|PROKR1|PPARG|NPY2R|MAPK10|CARTPT	http://amigo.geneontology.org/amigo/term/GO:0007623
organic acid binding	Gene Ontology	GO:0043177	7	37	0.000674478	0.00846463	HMMR|CEMIP|STAB2|ACAN|GLRA4|PAH|AKR1C2	http://amigo.geneontology.org/amigo/term/GO:0043177
kinase binding	Gene Ontology	GO:0019900	12	105	0.000678441	0.00847573	ANGPT1|E2F1|EEF1A2|NTRK2|CAPS|PRKAR2B|NRG1|CADPS|CDH2|DUSP1|SPDYC|ANGPT4	http://amigo.geneontology.org/amigo/term/GO:0019900
regulation of nitrogen compound metabolic process	Gene Ontology	GO:0051171	96	1915	0.000681638	0.00849176	HIST1H4A|PCK1|TRIM15|HIST1H4D|PLK1|TBX20|HIST1H4L|SCRT2|MAFA|ADIPOQ|NTRK2|R3HDML|RELN|MUC1|DPRX|LDB2|FOXH1|ELFN2|ACSL1|ZNF280A|VIP|PID1|FOXM1|NGB|TBR1|EDNRB|APOA2|IRG1|PPM1E|TDPX2|TNXB|ZIC1|PPP1R14A|IGF1|TICRR|HOXB1|LMX1A|LIN28B|LIN28A|PPARG|HIST2H3D|PAX1|F12|PROK1|PRDM13|ETV7|CDC20|RIPPLY3|DUXA|SERPINA12|LAG3|KIF14|MAPK10|FZD4|PRAME|PTTG1|CIDEA|CST5|TGFBR3|TGFBR2|KISS1|ASCL2|CKS2|NAT1|FOXD1|LTB|…	http://amigo.geneontology.org/amigo/term/GO:0051171
blood microparticle	Gene Ontology	GO:0072562	5	17	0.000745277	0.00923269	HBA1|TF|ITIH2|SLC4A1|HBB	http://amigo.geneontology.org/amigo/term/GO:0072562
chromatin silencing at rDNA	Gene Ontology	GO:0000183	4	9	0.00075423	0.00926596	HIST1H3J|HIST1H4B|HIST1H3I|HIST1H3D	http://amigo.geneontology.org/amigo/term/GO:0000183
cytoskeleton-dependent cytokinesis	Gene Ontology	GO:0061640	4	9	0.00075423	0.00926596	ANLN|NUSAP1|KIF23|KIF20A	http://amigo.geneontology.org/amigo/term/GO:0061640
positive regulation of cellular carbohydrate metabolic process	Gene Ontology	GO:0010676	4	9	0.00075423	0.00926596	GPLD1|DUSP1|MAS1|NTSR1	http://amigo.geneontology.org/amigo/term/GO:0010676
intracellular vesicle	Gene Ontology	GO:0097708	21	261	0.000768376	0.00941367	ELANE|CEMIP|ORM1|TRIM72|RAB26|CAPS|CFD|SLC2A4|ACKR1|FGFR3|ADRB2|IGF1|SPPL2C|SYT1|HBA1|APOB|CADPS|HBA2|GAD1|SYNGR3|FABP9	http://amigo.geneontology.org/amigo/term/GO:0097708
osteoblast differentiation	Gene Ontology	GO:0001649	7	38	0.000775419	0.00947378	BMP2|MMP13|CAT|HN1|SOX2|MYOC|IBSP	http://amigo.geneontology.org/amigo/term/GO:0001649
peptidase inhibitor activity	Gene Ontology	GO:0030414	6	27	0.00078524	0.00948921	BIRC5|R3HDML|PROL1|PTTG1|ITIH5|CST4	http://amigo.geneontology.org/amigo/term/GO:0030414
chromosome, centromeric region	Gene Ontology	GO:0000775	6	27	0.00078524	0.00948921	CENPM|SMC1B|CENPI|CENPF|ERCC6L|CENPU	http://amigo.geneontology.org/amigo/term/GO:0000775
sodium ion transmembrane transporter activity	Gene Ontology	GO:0015081	6	27	0.00078524	0.00948921	SGK2|SLC6A4|ASIC5|HCN2|SCN2A|SCN4A	http://amigo.geneontology.org/amigo/term/GO:0015081
positive regulation of developmental growth	Gene Ontology	GO:0048639	6	27	0.00078524	0.00948921	TBX20|SYT4|CDK1|ADRB2|UNC13A|RIMS2	http://amigo.geneontology.org/amigo/term/GO:0048639
sequence-specific double-stranded DNA binding	Gene Ontology	GO:1990837	12	109	0.000915073	0.0109186	MCM10|FEZF2|MUC1|OTX1|TBR1|INSM1|EN1|MAFA|PDX1|LEF1|MEOX1|ATF3	http://amigo.geneontology.org/amigo/term/GO:1990837
negative regulation of protein metabolic process	Gene Ontology	GO:0051248	15	158	0.000924813	0.0109186	SERPINA12|WT1|PTK6|PI16|LRRC15|CSTL1|R3HDML|PROL1|ITM2A|C8orf88|FOXM1|MMP9|SPINK4|HHATL|ELFN2	http://amigo.geneontology.org/amigo/term/GO:0051248
condensed chromosome, centromeric region	Gene Ontology	GO:0000779	5	18	0.000925684	0.0109186	SKA1|ZWINT|CENPM|BUB1B|MAST1	http://amigo.geneontology.org/amigo/term/GO:0000779
extracellular ligand-gated ion channel activity	Gene Ontology	GO:0005230	5	18	0.000925684	0.0109186	GABRE|GRIN2B|CACNG4|GRIN2D|GRIA4	http://amigo.geneontology.org/amigo/term/GO:0005230
negative regulation of wound healing	Gene Ontology	GO:0061045	5	18	0.000925684	0.0109186	F12|MAST1|F2|CD34|FGF2	http://amigo.geneontology.org/amigo/term/GO:0061045
plasma membrane bounded cell projection organization	Gene Ontology	GO:0120036	17	193	0.000948398	0.0111274	CCDC64|NTNG1|FN1|WASF3|SYT1|EPYC|PARD6B|TLX2|TBR1|IL6|KLF4|P2RY12|RELN|ZMYND10|MYOC|EZH2|SPTBN1	http://amigo.geneontology.org/amigo/term/GO:0120036
response to abiotic stimulus	Gene Ontology	GO:0009628	17	193	0.000948398	0.0111274	FIGF|CYP1A1|GJA3|COL11A1|SCARA5|IVL|PENK|EEF1A2|CRYAB|CAT|TRPM1|SFRP1|UTS2|TH|TACR3|CHRNA9|CAV1	http://amigo.geneontology.org/amigo/term/GO:0009628
visual system development	Gene Ontology	GO:0150063	8	52	0.000956103	0.0111882	EPHB1|FZD4|CDKN1C|OLFM3|TH|PAX2|CRYBA2|TRPM1	http://amigo.geneontology.org/amigo/term/GO:0150063
sulfur compound binding	Gene Ontology	GO:1901681	7	40	0.00101291	0.011752	ADAMTS5|PTN|SFRP1|CD34|CXCL11|APLP1|FGF1	http://amigo.geneontology.org/amigo/term/GO:1901681
establishment or maintenance of cell polarity	Gene Ontology	GO:0007163	7	40	0.00101291	0.011752	FOXJ1|DST|KIF26B|CYP26B1|MAST1|NDC80|GSN	http://amigo.geneontology.org/amigo/term/GO:0007163
inorganic ion homeostasis	Gene Ontology	GO:0098771	11	95	0.00101489	0.011752	CCKBR|UTS2|CEMIP|SGK2|SLC24A2|PYGM|JPH3|GALR1|TF|CAV3|CCR8	http://amigo.geneontology.org/amigo/term/GO:0098771
regulation of postsynapse organization	Gene Ontology	GO:0099175	4	10	0.00102746	0.0118667	ITPKA|NLGN1|RELN|PAK3	http://amigo.geneontology.org/amigo/term/GO:0099175
glycerophospholipid biosynthetic process	Gene Ontology	GO:0046474	8	53	0.00106792	0.0123019	SLC44A4|KLB|KL|CWH43|PIK3C2G|FGF4|FGFR3|APOA2	http://amigo.geneontology.org/amigo/term/GO:0046474
positive regulation of RNA metabolic process	Gene Ontology	GO:0051254	20	250	0.00107916	0.0123991	E2F7|FOXP3|EGR1|CCNA2|MT3|MUC1|HOXB1|SOHLH1|FOXD1|SOX2|POU4F1|PAX7|MYOCD|PAX2|PF4|CXCL10|LEF1|NKX2-5|SCX|DDN	http://amigo.geneontology.org/amigo/term/GO:0051254
actin-based cell projection	Gene Ontology	GO:0098858	6	29	0.00108583	0.0124436	STARD10|ACTN2|AOC3|CLIC5|TMC2|VIL1	http://amigo.geneontology.org/amigo/term/GO:0098858
positive regulation of ion transmembrane transport	Gene Ontology	GO:0034767	5	19	0.00113664	0.0128596	JPH2|ACTN2|F2|TRDN|EDN3	http://amigo.geneontology.org/amigo/term/GO:0034767
neuron projection terminus	Gene Ontology	GO:0044306	5	19	0.00113664	0.0128596	PVALB|NMU|GHRH|SNCB|SYN1	http://amigo.geneontology.org/amigo/term/GO:0044306
cellular response to hexose stimulus	Gene Ontology	GO:0071331	5	19	0.00113664	0.0128596	MLXIPL|GATA4|BRSK2|FN1|TH	http://amigo.geneontology.org/amigo/term/GO:0071331
biomineralization	Gene Ontology	GO:0110148	5	19	0.00113664	0.0128596	S1PR1|MMP13|FBN2|BMP2|KL	http://amigo.geneontology.org/amigo/term/GO:0110148
protein modification process	Gene Ontology	GO:0036211	49	857	0.00121664	0.0136602	ELANE|NUAK2|KISS1|CD36|FABP4|MAGEC2|ADAM18|INHBA|EDNRB|CAV2|SPTBN1|IQGAP3|ADAMTS5|ZBTB16|KLF15|SIK2|CDKN3|ZP4|DSC1|CDCA2|TPTE|TRIML2|AURKA|CDK5R2|ANGPT4|ARTN|ART3|CDKN2A|MLXIPL|MUC1|PER1|SMYD1|MAS1|HIST1H1D|BMP3|F10|HIST1H1B|IGF1|CCL11|PROK1|UBE2C|NEURL1|PADI3|UBE2T|ADRB2|ITLN1|GRIN2D|CDC20B|AVPR2	http://amigo.geneontology.org/amigo/term/GO:0036211
maintenance of location	Gene Ontology	GO:0051235	9	68	0.00123179	0.0137954	DGAT2|ACACB|SLC17A7|FBN2|NTSR1|IL6|JPH3|CXCL10|CAV1	http://amigo.geneontology.org/amigo/term/GO:0051235
cell fate commitment	Gene Ontology	GO:0045165	11	98	0.00127721	0.014161	FOXP3|FEZF2|SPRY2|ONECUT2|TBR1|SIX2|TLX3|POU4F1|PAX2|PITX1|PROX1	http://amigo.geneontology.org/amigo/term/GO:0045165
lytic vacuole	Gene Ontology	GO:0000323	10	83	0.0012911	0.0142794	GPLD1|MMP13|CGA|CHGA|PSAPL1|CRHBP|SLC7A14|GPC3|MMD|GNAI1	http://amigo.geneontology.org/amigo/term/GO:0000323
serine-type endopeptidase activity	Gene Ontology	GO:0004252	7	42	0.00130409	0.0143872	PROZ|CFB|MASP1|CMA1|MMP9|SERPINB7|WFDC6	http://amigo.geneontology.org/amigo/term/GO:0004252
negative regulation of tumor necrosis factor superfamily cytokine production	Gene Ontology	GO:1903556	4	11	0.00136337	0.0149667	FOXP3|ORM1|ADIPOQ|CIDEA	http://amigo.geneontology.org/amigo/term/GO:1903556
regulation of cardiac muscle tissue development	Gene Ontology	GO:0055024	4	11	0.00136337	0.0149667	HN1|TBX20|RBP4|MYOCD	http://amigo.geneontology.org/amigo/term/GO:0055024
protein heterooligomerization	Gene Ontology	GO:0051291	5	20	0.00138116	0.0150502	HBA1|HIST1H4J|HIST1H4L|RRM2|COL1A1	http://amigo.geneontology.org/amigo/term/GO:0051291
organic acid transmembrane transporter activity	Gene Ontology	GO:0005342	5	20	0.00138116	0.0150502	SLC5A8|SLC16A3|SLC17A7|SLC7A5|SLCO1C1	http://amigo.geneontology.org/amigo/term/GO:0005342
electron transfer activity	Gene Ontology	GO:0009055	5	20	0.00138116	0.0150502	AOX1|CYP1A2|ACADL|DMGDH|HSD17B6	http://amigo.geneontology.org/amigo/term/GO:0009055
negative regulation of phosphorylation	Gene Ontology	GO:0042326	10	84	0.00140134	0.0152327	CCNB1|SFRP1|LRRC15|KLF4|BGN|DKK1|INHBA|PRKAR2B|MAS1|MYOG	http://amigo.geneontology.org/amigo/term/GO:0042326
organonitrogen compound metabolic process	Gene Ontology	GO:1901564	93	1894	0.001484	0.0160525	HIST1H4B|TIMP4|CPM|GHR|HIST1H4I|ADIPOQ|NCAN|HIST1H4E|EDN3|FGG|WT1|B3GALT1|MUC1|CCL21|UMODL1|ADAMTS20|IGHEP1|CPB1|KIT|GFRA2|NGB|EDNRB|ACADL|KLHL33|IL6|DGAT2|TNXB|PRSS33|SRMS|DIO1|CDK5R2|GRM4|PPP1R14A|HMMR|TFR2|TICRR|PAX7|IGFBP1|IGFBP6|ACO1|ADAMTS1|TACR3|TYRO3|KCNH1|HS6ST3|SERPINA12|INMT|EPHA8|ESCO2|PDE11A|HHATL|S100A8|CST2|PTTG1|S100A7|HAS3|KLHL13|PCSK1N|MUC5AC|PROK1|PROX1|IL19|DEGS2|SLC22A12|CLGN…	http://amigo.geneontology.org/amigo/term/GO:1901564
cell growth	Gene Ontology	GO:0016049	10	85	0.00151911	0.0163924	TGFBR3|NPR1|SGK2|WISP1|CRYAB|PPARG|S100A8|UNC13A|ROS1|RIMS2	http://amigo.geneontology.org/amigo/term/GO:0016049
regulation of proteolysis	Gene Ontology	GO:0030162	13	133	0.00155142	0.0167004	BRSK2|SH3D19|ITIH5|MMP9|ADAM8|CLEC3B|GPC3|MT3|PTTG1|PI16|CST6|PAX2|CST5	http://amigo.geneontology.org/amigo/term/GO:0030162
positive regulation of growth	Gene Ontology	GO:0045927	7	44	0.00165688	0.0176641	F2|SFRP1|SYT4|AKAP6|GPAM|UNC13A|NRG1	http://amigo.geneontology.org/amigo/term/GO:0045927
carbohydrate binding	Gene Ontology	GO:0030246	7	44	0.00165688	0.0176641	CLEC6A|ACAN|ENPP2|SLC7A11|FREM1|ITLN1|LGALS9B	http://amigo.geneontology.org/amigo/term/GO:0030246
cellular response to dopamine	Gene Ontology	GO:1903351	4	12	0.00176896	0.018635	GNAL|RGS8|CAV2|HTR1E	http://amigo.geneontology.org/amigo/term/GO:1903351
kinesin complex	Gene Ontology	GO:0005871	4	12	0.00176896	0.018635	KIF15|KIF11|KIF23|KIF4A	http://amigo.geneontology.org/amigo/term/GO:0005871
regulation of actomyosin structure organization	Gene Ontology	GO:0110020	4	12	0.00176896	0.018635	S1PR1|PROX1|TACR1|PPM1E	http://amigo.geneontology.org/amigo/term/GO:0110020
regulation of megakaryocyte differentiation	Gene Ontology	GO:0045652	4	12	0.00176896	0.018635	HIST1H4K|HIST1H4B|HIST1H4E|HIST1H4D	http://amigo.geneontology.org/amigo/term/GO:0045652
ear development	Gene Ontology	GO:0043583	8	58	0.00179333	0.0188469	SLITRK6|NEUROD1|HPN|LHX3|BMPER|SOX2|COL2A1|NKX3-2	http://amigo.geneontology.org/amigo/term/GO:0043583
cellular response to nitrogen compound	Gene Ontology	GO:1901699	11	103	0.00183658	0.0192558	WT1|GHR|ACTN2|RYR3|PDE2A|HTR4|SLC5A5|GNG13|CAV2|GLP2R|PDK4	http://amigo.geneontology.org/amigo/term/GO:1901699
regulation of gene expression	Gene Ontology	GO:0010468	55	1012	0.00185296	0.0193818	FOXP3|HIST1H4K|FOXG1|CRYAB|RET|TXNIP|FABP4|SCRT2|SOX2|PDE2A|COL2A1|CBX2|ALDH1A2|DYDC2|LHX3|APOB|FEZF1|PRAME|CCNE1|ZFP36|SOX17|MEOX2|ZIC3|DLX6|HIST2H2AA4|EEF1A2|TOP2A|TGFBR3|STRA8|CREB5|HOXB1|HOXC11|PAX7|UMODL1|SMYD1|PADI6|NELL1|IGF2BP3|FGF4|FGF2|FGF1|F2|ESR2|E2F2|RHOXF1|AVPR2|MAEL|DKK1|TYMS|HOXA5|HOXA4|COL1A1|CARTPT|EBF3|DAZL	http://amigo.geneontology.org/amigo/term/GO:0010468
voltage-gated cation channel activity	Gene Ontology	GO:0022843	6	33	0.00194366	0.0201797	DMD|KCNJ16|NLGN1|KCNG3|CACNG1|CACNG6	http://amigo.geneontology.org/amigo/term/GO:0022843
negative regulation of cell communication	Gene Ontology	GO:0010648	18	226	0.0019505	0.0201797	TGFBR2|IGF1|GFRAL|BMP2|CASQ2|IFI6|SLC24A2|MMP9|CHRDL1|PYDC1|PDE3B|HN1|NEURL1|GPC3|SCRT2|MAGEA3|NDRG2|DACT2	http://amigo.geneontology.org/amigo/term/GO:0010648
CXCR chemokine receptor binding	Gene Ontology	GO:0045236	3	5	0.00195199	0.0201797	CXCL9|CXCL13|PF4	http://amigo.geneontology.org/amigo/term/GO:0045236
calcium:cation antiporter activity	Gene Ontology	GO:0015368	3	5	0.00195199	0.0201797	SLC8A2|SLC24A5|ATP1A2	http://amigo.geneontology.org/amigo/term/GO:0015368
CCR chemokine receptor binding	Gene Ontology	GO:0048020	3	5	0.00195199	0.0201797	CCL23|CNIH2|CCL24	http://amigo.geneontology.org/amigo/term/GO:0048020
chromosomal region	Gene Ontology	GO:0098687	8	59	0.00197652	0.0203615	HIST1H4B|SMC1B|CENPE|CENPA|HIST1H4L|MEIKIN|HIST1H4I|BIRC5	http://amigo.geneontology.org/amigo/term/GO:0098687
response to nicotine	Gene Ontology	GO:0035094	5	22	0.00198335	0.0203615	CHRNA4|PDX1|ATP1A2|TH|NKX6-1	http://amigo.geneontology.org/amigo/term/GO:0035094
immune receptor activity	Gene Ontology	GO:0140375	5	22	0.00198335	0.0203615	PIGR|IL21R|IL12B|GHR|LEPR	http://amigo.geneontology.org/amigo/term/GO:0140375
plasma membrane protein complex	Gene Ontology	GO:0098797	10	89	0.00207309	0.0211546	KCNMB1|GJB2|KCNJ4|FXYD1|CASQ2|SCN9A|ATP1A3|ATP1A2|CDH2|KCNH2	http://amigo.geneontology.org/amigo/term/GO:0098797
regulation of macromolecule metabolic process	Gene Ontology	GO:0060255	86	1748	0.00207815	0.0211546	HIF3A|TIMP4|GHR|CD34|BGN|PCK1|CAV3|CAV1|NTRK2|CENPF|CREB5|TONSL|UMODL1|NKX6-1|BRSK2|GNG3|GDF10|DMRT1|ANGPT4|PPP1R1A|IFNL1|PPM1E|APOB|USP44|OTX1|ROS1|TTK|ZIC2|ZIC3|CDK5R2|GDF15|ANGPT1|THRSP|KPNA2|FOXJ1|HOXB1|LBX1|PAX7|FGF1|ITM2A|FGF21|POLQ|MAGEC2|TXNIP|GPRC5A|TP63|CST9L|HYPM|HAS3|TGFBR2|CKS2|CHRDL1|FOXD1|OLIG2|RAD51|HMX3|EEF1A2|IL12B|HIST1H2AM|MYBL1|PF4|HIST1H2AE|MYBL2|FAM83D|NUPR1L|FEZF2|SCARA5|C…	http://amigo.geneontology.org/amigo/term/GO:0060255
regulation of leukocyte cell-cell adhesion	Gene Ontology	GO:1903037	7	46	0.00207969	0.0211546	ANXA1|DTX1|EGR3|LAG3|CCL28|CD80|CCL21	http://amigo.geneontology.org/amigo/term/GO:1903037
cell-cell adhesion	Gene Ontology	GO:0098609	12	122	0.0022029	0.0223056	FOXJ1|CDH12|ROBO2|FOXP3|CLDN19|RET|CLDN8|NLGN1|MUC21|S100A9|KIF26B|FGG	http://amigo.geneontology.org/amigo/term/GO:0098609
cell-cell adhesion via plasma-membrane adhesion molecules	Gene Ontology	GO:0098742	6	34	0.00222146	0.0223913	PCDH9|CLDN9|CELSR3|CD209|CLDN5|CDH7	http://amigo.geneontology.org/amigo/term/GO:0098742
negative regulation of catabolic process	Gene Ontology	GO:0009895	6	34	0.00222146	0.0223913	ACACB|PDE3B|LEP|GPLD1|LEPR|MYOG	http://amigo.geneontology.org/amigo/term/GO:0009895
pyrophosphatase activity	Gene Ontology	GO:0016462	19	248	0.00223765	0.0225033	GINS2|RECQL4|NRG2|PREX2|FGD3|MYH11|CENPE|ERCC6L|GBP5|CCL11|CCL24|P2RY12|SPTBN1|GRIN2D|FAM13A|RGS8|STXBP5L|FGF1|GNAI1	http://amigo.geneontology.org/amigo/term/GO:0016462
collagen trimer	Gene Ontology	GO:0005581	4	13	0.00225114	0.0225878	COL22A1|COL25A1|COL11A1|COL1A1	http://amigo.geneontology.org/amigo/term/GO:0005581
chondrocyte differentiation	Gene Ontology	GO:0002062	5	23	0.00234735	0.023447	TGFBR2|COL9A1|BMP2|SIX2|SCX	http://amigo.geneontology.org/amigo/term/GO:0002062
perinuclear region of cytoplasm	Gene Ontology	GO:0048471	10	91	0.00240544	0.0238661	AKAP6|ESR2|PLCZ1|SYT5|CCDC78|MT1H|PACSIN1|S100A14|ALDH1A2|CAV1	http://amigo.geneontology.org/amigo/term/GO:0048471
cellular protein modification process	Gene Ontology	GO:0006464	46	821	0.00242903	0.0240463	ELANE|KCNE1|CCL11|CLSPN|PLK1|EPB42|MAPK15|FABP4|CEMIP|MYO3B|CXCL10|INSM1|CBX2|SPTBN1|IQGAP3|ADAMTS5|PPM1E|CCNE1|CAV3|CDCA2|KLF4|ADIPOQ|CCL23|FAM83D|ANGPT4|TOP2A|TGFBR2|HIST1H1B|KLHL33|KLHL31|SRMS|DMRTC2|PADI6|BMP3|F10|FGF4|ELFN2|HIST1H1C|CCNB2|AURKA|PROK1|AVPR2|CDC20|GRIN2B|EZH2|GRIN2D	http://amigo.geneontology.org/amigo/term/GO:0006464
endopeptidase regulator activity	Gene Ontology	GO:0061135	5	24	0.00275755	0.0272377	CST9L|PCSK1N|CARD17|LEF1|SPOCK3	http://amigo.geneontology.org/amigo/term/GO:0061135
mesoderm morphogenesis	Gene Ontology	GO:0048332	4	14	0.0028167	0.0275763	TBX20|NR4A3|SIX2|SOX17	http://amigo.geneontology.org/amigo/term/GO:0048332
positive regulation of gene expression, epigenetic	Gene Ontology	GO:0045815	4	14	0.0028167	0.0275763	HIST1H3H|HIST1H3F|HIST1H4I|APOBEC1	http://amigo.geneontology.org/amigo/term/GO:0045815
regulation of neural precursor cell proliferation	Gene Ontology	GO:2000177	4	14	0.0028167	0.0275763	HN1|DMRTA2|VAX1|SIX3	http://amigo.geneontology.org/amigo/term/GO:2000177
transmembrane receptor protein tyrosine kinase activity	Gene Ontology	GO:0004714	4	14	0.0028167	0.0275763	ADAM18|EPHB1|GPRC5A|RET	http://amigo.geneontology.org/amigo/term/GO:0004714
hyaluronic acid binding	Gene Ontology	GO:0005540	3	6	0.00285383	0.0276348	HMMR|ACAN|LYVE1	http://amigo.geneontology.org/amigo/term/GO:0005540
excitatory extracellular ligand-gated ion channel activity	Gene Ontology	GO:0005231	3	6	0.00285383	0.0276348	GRIA2|CHRNA9|P2RX6	http://amigo.geneontology.org/amigo/term/GO:0005231
lipase inhibitor activity	Gene Ontology	GO:0055102	3	6	0.00285383	0.0276348	SNCB|APOC3|APOA2	http://amigo.geneontology.org/amigo/term/GO:0055102
phosphatase regulator activity	Gene Ontology	GO:0019208	3	6	0.00285383	0.0276348	BMP2|ELFN2|PPP1R14A	http://amigo.geneontology.org/amigo/term/GO:0019208
cellular response to vitamin	Gene Ontology	GO:0071295	3	6	0.00285383	0.0276348	LEP|PTN|SFRP1	http://amigo.geneontology.org/amigo/term/GO:0071295
cytokine receptor binding	Gene Ontology	GO:0005126	7	49	0.00286459	0.0276786	IL17D|CXCL2|BMP2|CCL16|CSF3|CCL28|GDF15	http://amigo.geneontology.org/amigo/term/GO:0005126
peptidyl-lysine modification	Gene Ontology	GO:0018205	10	94	0.00298274	0.0287575	BIRC5|KLF15|EGR2|MUC1|SMYD1|DMRTC2|CDCA8|CBX2|HIST1H1B|HIST1H1C	http://amigo.geneontology.org/amigo/term/GO:0018205
growth factor activity	Gene Ontology	GO:0008083	5	25	0.00321718	0.0309506	FGF5|F2|CSF3|FGF2|REG1A	http://amigo.geneontology.org/amigo/term/GO:0008083
protein-containing complex assembly	Gene Ontology	GO:0065003	24	358	0.0033735	0.0322446	MYH11|KCNG3|HBB|PIH1D3|HIST2H2BF|TRPA1|DNAAF3|CAV3|HIST1H2BO|RYR3|VIL1|CDH2|GFAP|ASF1B|CENPF|HIST1H3C|HIST1H3D|HIST1H2BM|CAT|HIST1H2BJ|CAPZA3|C1QTNF6|GPX3|OPRD1	http://amigo.geneontology.org/amigo/term/GO:0065003
cis-regulatory region binding	Gene Ontology	GO:0035326	8	65	0.00340589	0.0324841	DMRTA2|TBX20|MUC1|PER1|SPP1|NKX2-5|MEOX1|ATOH8	http://amigo.geneontology.org/amigo/term/GO:0035326
nitrogen compound metabolic process	Gene Ontology	GO:0006807	131	2898	0.00341655	0.0325159	TGM3|HIST1H4E|HIST1H4H|PKDCC|DMGDH|PAH|CAV2|ADAMTS5|NCAN|LYVE1|LHX9|ESPL1|RELN|ZSWIM2|WT1|PCSK1|TRHDE|IL19|DMP1|ACSM2A|CCL21|UMODL1|FGFR3|NKX6-1|BRSK2|ALDH1L1|ADAM8|RHBDL1|CCNO|SLC19A3|PAK3|ELAVL2|KISS1R|TFR2|SOX11|KIT|MNX1|SPTSSB|PPP1R1A|IFNL1|APOB|EGR3|CCNE1|OTX1|SOHLH1|MYH6|MEOX2|DLX4|HMMR|ALPK3|KLHL30|ALG1L|TSHZ2|KLHL38|PPARG|PAX7|LGSN|FGF4|WFDC6|PAK7|PROK1|PRDM13|MAOA|NEIL3|SERPINA12|ACAN|SP…	http://amigo.geneontology.org/amigo/term/GO:0006807
chemical synaptic transmission, postsynaptic	Gene Ontology	GO:0099565	4	15	0.00347226	0.0326953	NETO1|GABRG2|GRIA4|NLGN1	http://amigo.geneontology.org/amigo/term/GO:0099565
cellular response to catecholamine stimulus	Gene Ontology	GO:0071870	4	15	0.00347226	0.0326953	HMP19|GNG2|HTR2A|RGS8	http://amigo.geneontology.org/amigo/term/GO:0071870
secretory granule lumen	Gene Ontology	GO:0034774	4	15	0.00347226	0.0326953	CLEC3B|ACTN2|VWF|ORM2	http://amigo.geneontology.org/amigo/term/GO:0034774
amino acid binding	Gene Ontology	GO:0016597	4	15	0.00347226	0.0326953	GRIN2B|GLDC|TDO2|GLRA4	http://amigo.geneontology.org/amigo/term/GO:0016597
regulation of cyclin-dependent protein kinase activity	Gene Ontology	GO:1904029	4	15	0.00347226	0.0326953	CDC25C|CCNE1|PROX1|NGB	http://amigo.geneontology.org/amigo/term/GO:1904029
cellular biosynthetic process	Gene Ontology	GO:0044249	88	1833	0.00351163	0.0329959	ELANE|HIST1H4E|PLK1|GSTA3|IL21|URAD|SCRT1|ADIPOQ|LHX2|DSC1|ONECUT2|NPR1|BMP8A|MUC1|NEUROD1|PIK3C2G|NKX6-1|FOXA3|HSD17B6|DMRT2|GPLD1|APOA1|CCNE2|SOX11|SOX17|EN1|HOXB9|FOS|PPARG|DDN|ACO1|FGF5|FGF4|HHATL|FAM57B|PRDM13|ITM2A|HS6ST3|ACAN|FABP4|TXNIP|AKR1C3|ASPA|TBX10|TCF21|HAS3|FOXD3|LTB|PLA2G2F|LEF1|UHRF1|CYP1A1|GALNT15|GSTM5|EMX1|SPP1|HOXA2|PTH1R|DTX1|SORBS1|GPD1|HIST1H2AJ|MYBL1|SOX3|ALDH1A2|NUPR1L|…	http://amigo.geneontology.org/amigo/term/GO:0044249
positive regulation of cellular process	Gene Ontology	GO:0048522	77	1567	0.00354299	0.0332202	HIF3A|GHRH|MGARP|FXYD1|CDKN1C|IL12B|PCOLCE2|MAPK15|GPLD1|MAPK10|LIFR|RBMS3|SOX2|NKX2-3|MYBL2|MIEN1|ALDH1A2|NKX2-5|NUPR1L|CCNA2|FEZF2|BRINP3|FOS|CBLN2|MAB21L1|CXCR5|SOX17|EN1|MEOX2|KLF4|ZIC2|DOK7|ZSWIM2|DLGAP5|NRG1|DLX6|FAM83D|C6|TGFBR2|TOP2A|FIGF|TRH|TFR2|CDKN2A|ACTL6B|METRN|MLXIPL|NR4A3|RAMP1|PYDC1|TBR1|HOXC11|TF|CDC6|IGFBP1|IL33|HBA1|APOB|F10|OLIG2|UHRF1|FGF1|SYT9|NMU|CLEC6A|SEMA3D|F7|GTSE1|LRR…	http://amigo.geneontology.org/amigo/term/GO:0048522
monooxygenase activity	Gene Ontology	GO:0004497	5	26	0.00372947	0.034895	PAH|CYP3A4|CYP2B6|PTGIS|CYP2F1	http://amigo.geneontology.org/amigo/term/GO:0004497
cellular response to abiotic stimulus	Gene Ontology	GO:0071214	7	52	0.00385836	0.0360198	ASCL1|CRYAB|MYLK|MFAP4|ATP1A2|AURKB|SCX	http://amigo.geneontology.org/amigo/term/GO:0071214
pattern specification process	Gene Ontology	GO:0007389	14	167	0.00386594	0.0360198	SP8|TP63|HOXB1|TBR1|SOX17|HOXA6|DLL3|PAX1|ZIC3|PAX2|SIX3|MEOX1|GPC3|NKX2-5	http://amigo.geneontology.org/amigo/term/GO:0007389
GABA-A receptor complex	Gene Ontology	GO:1902711	3	7	0.00397383	0.0363381	GABRE|GABRG1|GABRA3	http://amigo.geneontology.org/amigo/term/GO:1902711
monosaccharide binding	Gene Ontology	GO:0048029	3	7	0.00397383	0.0363381	P4HA3|GYS2|UPK1A	http://amigo.geneontology.org/amigo/term/GO:0048029
DNA-binding transcription repressor activity, RNA polymerase II-specific	Gene Ontology	GO:0001227	3	7	0.00397383	0.0363381	ISX|FEZF1|DMBX1	http://amigo.geneontology.org/amigo/term/GO:0001227
ligand-gated calcium channel activity	Gene Ontology	GO:0099604	3	7	0.00397383	0.0363381	TRPA1|CASQ2|JPH3	http://amigo.geneontology.org/amigo/term/GO:0099604
signal transduction involved in cellular response to ammonium ion	Gene Ontology	GO:1903831	3	7	0.00397383	0.0363381	D4S234E|HTR4|GNG2	http://amigo.geneontology.org/amigo/term/GO:1903831
3',5'-cyclic-AMP phosphodiesterase activity	Gene Ontology	GO:0004115	3	7	0.00397383	0.0363381	PDE11A|PDE3B|PDE2A	http://amigo.geneontology.org/amigo/term/GO:0004115
GABA receptor activity	Gene Ontology	GO:0016917	3	7	0.00397383	0.0363381	GABRA5|GABRD|GABRG1	http://amigo.geneontology.org/amigo/term/GO:0016917
protein localization to cell surface	Gene Ontology	GO:0034394	3	7	0.00397383	0.0363381	GPIHBP1|ANGPT1|CAV3	http://amigo.geneontology.org/amigo/term/GO:0034394
mast cell granule	Gene Ontology	GO:0042629	3	7	0.00397383	0.0363381	ANXA1|NR4A3|KIT	http://amigo.geneontology.org/amigo/term/GO:0042629
core promoter sequence-specific DNA binding	Gene Ontology	GO:0001046	4	16	0.00422422	0.0383117	NR4A3|ESR2|MEOX1|PROX1	http://amigo.geneontology.org/amigo/term/GO:0001046
regulation of response to drug	Gene Ontology	GO:2001023	4	16	0.00422422	0.0383117	CHRNA4|NPY2R|RGS8|GALR1	http://amigo.geneontology.org/amigo/term/GO:2001023
nucleoside diphosphate metabolic process	Gene Ontology	GO:0009132	4	16	0.00422422	0.0383117	MLXIPL|PFKFB1|HTR2A|GPD1	http://amigo.geneontology.org/amigo/term/GO:0009132
filopodium	Gene Ontology	GO:0030175	4	16	0.00422422	0.0383117	ACTN2|LPL|DMD|EPHB1	http://amigo.geneontology.org/amigo/term/GO:0030175
supramolecular polymer	Gene Ontology	GO:0099081	13	152	0.0045046	0.0407713	TMOD1|KRT2|DRP2|CENPE|KIF14|MAST1|MFAP2|SYNPO2|KY|SCN5A|BIRC5|SCN3B|KIF11	http://amigo.geneontology.org/amigo/term/GO:0099081
enzyme inhibitor activity	Gene Ontology	GO:0004857	7	54	0.00465309	0.041859	CDKN2A|CST9L|GPC3|TXNIP|LEF1|CST1|APOA1	http://amigo.geneontology.org/amigo/term/GO:0004857
sensory system development	Gene Ontology	GO:0048880	7	54	0.00465309	0.041859	LHX1|PRSS56|SLC17A7|MAB21L1|POU4F1|BMPR1B|KLF4	http://amigo.geneontology.org/amigo/term/GO:0048880
connective tissue development	Gene Ontology	GO:0061448	7	54	0.00465309	0.041859	COL11A1|TYMS|HOXA5|UMODL1|NKX3-2|COL2A1|SCX	http://amigo.geneontology.org/amigo/term/GO:0061448
carboxylic acid transmembrane transport	Gene Ontology	GO:1905039	5	28	0.00492484	0.0437709	SLC1A1|SLC7A5|SLC7A3|KCNJ10|ACACB	http://amigo.geneontology.org/amigo/term/GO:1905039
viral entry into host cell	Gene Ontology	GO:0046718	5	28	0.00492484	0.0437709	CD209|CLEC5A|CLEC4G|TYRO3|CD80	http://amigo.geneontology.org/amigo/term/GO:0046718
regulation of autophagy of mitochondrion	Gene Ontology	GO:1903146	5	28	0.00492484	0.0437709	MYH11|ADRB2|PGK2|HAPLN1|MYOM1	http://amigo.geneontology.org/amigo/term/GO:1903146
cytoplasmic side of plasma membrane	Gene Ontology	GO:0009898	5	28	0.00492484	0.0437709	PGM5|GNG4|SRMS|BMX|KIT	http://amigo.geneontology.org/amigo/term/GO:0009898
sarcomere	Gene Ontology	GO:0030017	5	28	0.00492484	0.0437709	MYOM2|TIMP4|ABCC9|PPP1R12B|CAV3	http://amigo.geneontology.org/amigo/term/GO:0030017
negative regulation of secretion by cell	Gene Ontology	GO:1903531	5	28	0.00492484	0.0437709	CGA|LEP|BMP8A|ACVR1C|CHGA	http://amigo.geneontology.org/amigo/term/GO:1903531
developmental growth	Gene Ontology	GO:0048589	13	154	0.00498199	0.0441903	SLITRK6|ANXA1|GHR|LHX1|ASPM|PSAPL1|EMX1|LEP|BMPR1B|IGFBP1|GATA4|PLAC1|NKX6-1	http://amigo.geneontology.org/amigo/term/GO:0048589
positive regulation of cellular protein localization	Gene Ontology	GO:1903829	6	41	0.00507839	0.0449554	NMUR1|IFNL3|CDK1|LRRC46|NRG1|GPR26	http://amigo.geneontology.org/amigo/term/GO:1903829
cytoplasmic vesicle	Gene Ontology	GO:0031410	20	289	0.00509054	0.0449732	FIGF|ANXA1|KCNH1|TRIM72|EPHA8|HMP19|SYT1|STAB2|SLC7A11|CD36|STX11|CNGA2|NTRK2|CASC5|FHL5|CARTPT|ADAMTS1|SVOP|PGA5|APOA2	http://amigo.geneontology.org/amigo/term/GO:0031410
sensory organ development	Gene Ontology	GO:0007423	14	173	0.00515096	0.0454165	LHX1|HMX3|PRSS56|TMOD1|SLC17A7|CRB2|CYP26B1|LHX3|RAX|SOX3|DLX5|TRPM1|ALDH1A2|HOXA2	http://amigo.geneontology.org/amigo/term/GO:0007423
skin morphogenesis	Gene Ontology	GO:0043589	3	8	0.00532614	0.0464075	TP63|CDSN|COL1A1	http://amigo.geneontology.org/amigo/term/GO:0043589
heterotrimeric G-protein complex	Gene Ontology	GO:0005834	3	8	0.00532614	0.0464075	GNAT3|GNG2|GNG3	http://amigo.geneontology.org/amigo/term/GO:0005834
protein kinase A signaling	Gene Ontology	GO:0010737	3	8	0.00532614	0.0464075	LPL|SPHKAP|ZP4	http://amigo.geneontology.org/amigo/term/GO:0010737
microtubule motor activity	Gene Ontology	GO:0003777	3	8	0.00532614	0.0464075	KIFC2|KIF26B|KIFC1	http://amigo.geneontology.org/amigo/term/GO:0003777
regulation of sensory perception	Gene Ontology	GO:0051931	3	8	0.00532614	0.0464075	SPX|PROL1|SCN11A	http://amigo.geneontology.org/amigo/term/GO:0051931
tube development	Gene Ontology	GO:0035295	21	311	0.00540563	0.0469158	RSPO3|NPR1|TYMS|GPLD1|EN1|RAD21L1|TBX20|PTK6|CAV3|SOX17|IL6|SALL4|LHX3|MEOX2|GBX2|NKX2-2|TNNI3|TMEM100|FGF2|ADM2|ATOH8	http://amigo.geneontology.org/amigo/term/GO:0035295
cellular response to tumor necrosis factor	Gene Ontology	GO:0071356	7	56	0.00556524	0.0480681	CCL7|CCL16|DTL|NTRK2|LTB|APOA1|TNFRSF18	http://amigo.geneontology.org/amigo/term/GO:0071356
glycosaminoglycan binding	Gene Ontology	GO:0005539	5	29	0.00561427	0.0480681	ABI3BP|EPYC|FGF1|FN1|SOD3	http://amigo.geneontology.org/amigo/term/GO:0005539
calmodulin binding	Gene Ontology	GO:0005516	5	29	0.00561427	0.0480681	MYLK2|RYR3|KCNH1|SCN3A|IQGAP3	http://amigo.geneontology.org/amigo/term/GO:0005516
inorganic anion transmembrane transport	Gene Ontology	GO:0098661	5	29	0.00561427	0.0480681	GABRA4|SLC17A7|GABRQ|GABRA3|GLRA4	http://amigo.geneontology.org/amigo/term/GO:0098661
cytokine activity	Gene Ontology	GO:0005125	5	29	0.00561427	0.0480681	CXCL11|IL17D|CXCL13|CSF3|DTL	http://amigo.geneontology.org/amigo/term/GO:0005125
negative regulation of peptide secretion	Gene Ontology	GO:0002792	5	29	0.00561427	0.0480681	CX3CL1|ANXA1|SFRP1|UTS2|TNFRSF9	http://amigo.geneontology.org/amigo/term/GO:0002792
potassium ion transmembrane transporter activity	Gene Ontology	GO:0015079	5	29	0.00561427	0.0480681	SLC24A2|ANK2|FHL1|ATP1A3|CAV3	http://amigo.geneontology.org/amigo/term/GO:0015079
extracellular matrix	Gene Ontology	GO:0031012	6	42	0.0056394	0.0481902	ADAMTS1|COL11A1|CLEC3B|MFAP4|ADAMTS20|COL17A1	http://amigo.geneontology.org/amigo/term/GO:0031012
perikaryon	Gene Ontology	GO:0043204	4	18	0.00604175	0.0513317	PTPRN|SLC8A2|NEURL1|NTSR1	http://amigo.geneontology.org/amigo/term/GO:0043204
nucleotide binding	Gene Ontology	GO:0000166	24	377	0.00610515	0.0517712	RECQL4|PCK1|KIF14|KIF15|MOCS1|DQX1|GNAT3|SIK2|BMX|TOP2A|TGFBR2|ALPK3|GSG2|MYLK2|TUBB3|IGF2BP1|FGFR3|RAB26|PFKFB1|HCN2|MYLK|PDE2A|RAD51|KIF20A	http://amigo.geneontology.org/amigo/term/GO:0000166
regulation of morphogenesis of an epithelium	Gene Ontology	GO:1905330	5	30	0.006369	0.0535982	CXCL10|PAX2|CTHRC1|C6|GSN	http://amigo.geneontology.org/amigo/term/GO:1905330
cell adhesion molecule binding	Gene Ontology	GO:0050839	5	30	0.006369	0.0535982	POSTN|DST|IGF1|ECM2|NLGN1	http://amigo.geneontology.org/amigo/term/GO:0050839
motor activity	Gene Ontology	GO:0003774	5	30	0.006369	0.0535982	STARD9|MYH1|KIF18A|KIF11|KIF18B	http://amigo.geneontology.org/amigo/term/GO:0003774
organic acid transmembrane transport	Gene Ontology	GO:1903825	5	30	0.006369	0.0535982	SLC7A3|SLC7A5|SLC7A10|SLC36A2|ACACB	http://amigo.geneontology.org/amigo/term/GO:1903825
phosphoric ester hydrolase activity	Gene Ontology	GO:0042578	9	89	0.00638102	0.0535982	PPM1E|NOTUM|SLC7A14|CFD|CDC25C|TPTE|LPPR5|CASC5|PPP1R14A	http://amigo.geneontology.org/amigo/term/GO:0042578
dendrite	Gene Ontology	GO:0030425	8	73	0.00642519	0.0538672	ACTN2|CHL1|ADRB2|GNG3|KLHL1|NRG1|BRINP3|P2RX6	http://amigo.geneontology.org/amigo/term/GO:0030425
regulation of Wnt signaling pathway	Gene Ontology	GO:0030111	7	58	0.00660494	0.0552697	EGR1|SOX17|DACT2|IGFBP6|TERT|FGF2|NKX2-5	http://amigo.geneontology.org/amigo/term/GO:0030111
transcription factor complex	Gene Ontology	GO:0005667	6	44	0.00689506	0.0567503	E2F7|CEBPA|NEUROD1|FOS|STON1-GTF2A1L|HOXB13	http://amigo.geneontology.org/amigo/term/GO:0005667
negative regulation of kinase activity	Gene Ontology	GO:0033673	6	44	0.00689506	0.0567503	PPP1R1A|PLK1|PYDC1|FABP4|PRKAR2B|CAV3	http://amigo.geneontology.org/amigo/term/GO:0033673
cell-cell signaling by wnt	Gene Ontology	GO:0198738	8	74	0.00691186	0.0567503	AMER2|EGR1|CELSR3|SOX17|HN1|SIX3|C6|CAV1	http://amigo.geneontology.org/amigo/term/GO:0198738
myosin binding	Gene Ontology	GO:0017022	3	9	0.00692264	0.0567503	MYOC|AMPD1|DMD	http://amigo.geneontology.org/amigo/term/GO:0017022
L-alpha-amino acid transmembrane transport	Gene Ontology	GO:1902475	3	9	0.00692264	0.0567503	SLC1A6|SLC17A7|SLC7A3	http://amigo.geneontology.org/amigo/term/GO:1902475
positive regulation of cell cycle G1/S phase transition	Gene Ontology	GO:1902808	3	9	0.00692264	0.0567503	CYP1A1|CDC6|FAM83D	http://amigo.geneontology.org/amigo/term/GO:1902808
rhythmic behavior	Gene Ontology	GO:0007622	3	9	0.00692264	0.0567503	IL6|GHRH|SIX3	http://amigo.geneontology.org/amigo/term/GO:0007622
specification of animal organ identity	Gene Ontology	GO:0010092	3	9	0.00692264	0.0567503	HOXC11|FOXH1|FGF1	http://amigo.geneontology.org/amigo/term/GO:0010092
regulation of carbohydrate biosynthetic process	Gene Ontology	GO:0043255	3	9	0.00692264	0.0567503	PTH1R|LHCGR|SERPINA12	http://amigo.geneontology.org/amigo/term/GO:0043255
glycosaminoglycan catabolic process	Gene Ontology	GO:0006027	3	9	0.00692264	0.0567503	HPSE2|CEMIP|PGLYRP4	http://amigo.geneontology.org/amigo/term/GO:0006027
regulation of alcohol biosynthetic process	Gene Ontology	GO:1902930	3	9	0.00692264	0.0567503	LHCGR|MAS1|FGF1	http://amigo.geneontology.org/amigo/term/GO:1902930
negative regulation of small molecule metabolic process	Gene Ontology	GO:0062014	4	19	0.00711882	0.0580367	SERPINA12|APOC3|ADIPOQ|PROX1	http://amigo.geneontology.org/amigo/term/GO:0062014
carboxylic acid transmembrane transporter activity	Gene Ontology	GO:0046943	4	19	0.00711882	0.0580367	SLC7A14|SLC26A9|SLC17A7|SLC27A6	http://amigo.geneontology.org/amigo/term/GO:0046943
heparin binding	Gene Ontology	GO:0008201	4	19	0.00711882	0.0580367	CLEC3B|REG4|OGN|CXCL13	http://amigo.geneontology.org/amigo/term/GO:0008201
cell surface receptor signaling pathway involved in cell-cell signaling	Gene Ontology	GO:1905114	10	108	0.00728414	0.0592756	BMP2|NLGN1|CCNE1|GLRA4|HN1|ADRB2|SEZ6|C6|RIMS2|CAV1	http://amigo.geneontology.org/amigo/term/GO:1905114
carbohydrate biosynthetic process	Gene Ontology	GO:0016051	6	45	0.00759348	0.0616797	DGAT2|LEPR|RBP4|ATF3|ADIPOQ|HAS3	http://amigo.geneontology.org/amigo/term/GO:0016051
peptidyl-amino acid modification	Gene Ontology	GO:0018193	14	182	0.0077021	0.0624476	DYDC2|F2|PROZ|CLSPN|IVL|CD80|MYLK2|BGN|IFNB1|P4HA3|S100A8|NNAT|ANGPT1|CDK1	http://amigo.geneontology.org/amigo/term/GO:0018193
GTPase binding	Gene Ontology	GO:0051020	9	92	0.00773988	0.0626394	FGD3|BIRC5|RET|FGFR3|PTPRN|FGF5|ARTN|DOCK11|CAV1	http://amigo.geneontology.org/amigo/term/GO:0051020
nucleoside diphosphate phosphorylation	Gene Ontology	GO:0006165	5	32	0.00808658	0.0652072	MLXIPL|HTR2A|MYOG|GPD1|AK5	http://amigo.geneontology.org/amigo/term/GO:0006165
adenyl nucleotide binding	Gene Ontology	GO:0030554	18	262	0.00811432	0.0653121	TPX2|KIF1A|ACVR1C|ATP1A2|UBE2C|EPHA8|OASL|ACSM2B|ENTPD8|PKDCC|CACNA1B|ABCC9|RAD51|DQX1|P2RX6|FGFR3|CDC6|PAK3	http://amigo.geneontology.org/amigo/term/GO:0030554
ATP binding	Gene Ontology	GO:0005524	17	242	0.00814187	0.0654152	ABCA10|NPR1|SMC1B|BMX|ERCC6L|MYLK2|ACSM2A|ORC1|BMPR1B|SRMS|MAPK10|PDK4|RAD51|PIK3C2G|UBE2S|UBE2T|CDC6	http://amigo.geneontology.org/amigo/term/GO:0005524
nucleoplasm	Gene Ontology	GO:0005654	28	474	0.00828004	0.0661796	HIST1H4B|ONECUT2|HIST1H4H|HIST1H4J|HIST2H2BE|KIAA0101|PRC1|MEOX2|DYDC2|CRABP2|CDCA2|CDCA5|CDCA8|TERT|C6|TOP2A|ANXA1|HOXC11|HIST2H3D|HIST1H3H|E2F7|MAGEA11|NEUROD1|OLR1|INSM1|HN1|RAD51|UBE2T	http://amigo.geneontology.org/amigo/term/GO:0005654
oxidoreductase activity, acting on CH-OH group of donors	Gene Ontology	GO:0016614	4	20	0.00831525	0.0661796	HAO1|RDH16|AKR7A3|AKR1C2	http://amigo.geneontology.org/amigo/term/GO:0016614
negative regulation of protein transport	Gene Ontology	GO:0051224	4	20	0.00831525	0.0661796	ANXA1|ADIPOQ|APOA2|FN1	http://amigo.geneontology.org/amigo/term/GO:0051224
response to BMP	Gene Ontology	GO:0071772	4	20	0.00831525	0.0661796	TMEM100|EGR1|BMP8A|TMPRSS6	http://amigo.geneontology.org/amigo/term/GO:0071772
chromatin organization involved in regulation of transcription	Gene Ontology	GO:0034401	4	20	0.00831525	0.0661796	HIST1H4I|HIST2H3D|HIST1H3G|HIST2H4A	http://amigo.geneontology.org/amigo/term/GO:0034401
coated vesicle	Gene Ontology	GO:0030135	6	46	0.00834146	0.0661796	TYRP1|SYT1|SLC2A4|EPN3|VWF|GAD1	http://amigo.geneontology.org/amigo/term/GO:0030135
metal ion transmembrane transporter activity	Gene Ontology	GO:0046873	8	77	0.00853945	0.0676294	KCNH2|ASIC5|SLC24A5|SCN2A|GAL|CASQ2|SCN4B|HPN	http://amigo.geneontology.org/amigo/term/GO:0046873
structural molecule activity	Gene Ontology	GO:0005198	9	94	0.00876126	0.0683813	MATN3|KRT31|ACAN|TUBB4A|DES|BFSP2|KRT35|DSPP|COL1A1	http://amigo.geneontology.org/amigo/term/GO:0005198
cellular response to nutrient	Gene Ontology	GO:0031670	3	10	0.00877316	0.0683813	LEP|PTN|SFRP1	http://amigo.geneontology.org/amigo/term/GO:0031670
mating	Gene Ontology	GO:0007618	3	10	0.00877316	0.0683813	EDNRB|MAPK8IP2|SLC6A4	http://amigo.geneontology.org/amigo/term/GO:0007618
acrosomal vesicle	Gene Ontology	GO:0001669	3	10	0.00877316	0.0683813	TMEM190|CAV1|KIT	http://amigo.geneontology.org/amigo/term/GO:0001669
intrinsic apoptotic signaling pathway in response to endoplasmic reticulum stress	Gene Ontology	GO:0070059	3	10	0.00877316	0.0683813	MAGEA3|PDX1|BRSK2	http://amigo.geneontology.org/amigo/term/GO:0070059
regulation of stress fiber assembly	Gene Ontology	GO:0051492	3	10	0.00877316	0.0683813	MYOC|KISS1R|APOA1	http://amigo.geneontology.org/amigo/term/GO:0051492
neurotransmitter binding	Gene Ontology	GO:0042165	3	10	0.00877316	0.0683813	MAOA|HTR2A|CHRNA9	http://amigo.geneontology.org/amigo/term/GO:0042165
negative regulation of mRNA metabolic process	Gene Ontology	GO:1903312	3	10	0.00877316	0.0683813	IGF2BP1|VIP|E2F1	http://amigo.geneontology.org/amigo/term/GO:1903312
response to bronchodilator	Gene Ontology	GO:0097366	3	10	0.00877316	0.0683813	MT3|TH|OXTR	http://amigo.geneontology.org/amigo/term/GO:0097366
cell cortex	Gene Ontology	GO:0005938	5	33	0.00905531	0.0702937	KNCN|ANLN|ERMN|CLDN5|SPTBN1	http://amigo.geneontology.org/amigo/term/GO:0005938
cysteine-type endopeptidase activity involved in apoptotic process	Gene Ontology	GO:0097153	5	33	0.00905531	0.0702937	SOX2|BIRC5|KLF4|DPEP1|MMP9	http://amigo.geneontology.org/amigo/term/GO:0097153
cell projection membrane	Gene Ontology	GO:0031253	6	47	0.00914084	0.0706265	PTH1R|DMD|S100P|ITLN1|OPRD1|BMX	http://amigo.geneontology.org/amigo/term/GO:0031253
membrane region	Gene Ontology	GO:0098589	6	47	0.00914084	0.0706265	SDPR|S1PR1|CD36|ADRB2|EPHB1|ADAM18	http://amigo.geneontology.org/amigo/term/GO:0098589
microtubule cytoskeleton	Gene Ontology	GO:0015630	13	167	0.00915822	0.0706378	CLIC5|POC1A|ASPM|CENPE|TACC3|AUNIP|KIF18B|KIF15|SKA3|CCDC141|ZMYND10|AURKB|ESPL1	http://amigo.geneontology.org/amigo/term/GO:0015630
protein domain specific binding	Gene Ontology	GO:0019904	9	95	0.0093087	0.0716737	WT1|HIST1H4B|HIST1H4H|PDE2A|FOXA3|PRKAR2B|ADAM18|TP63|PAK3	http://amigo.geneontology.org/amigo/term/GO:0019904
channel regulator activity	Gene Ontology	GO:0016247	4	21	0.00963603	0.0738097	NPY2R|CRISP1|SCN3B|CAV1	http://amigo.geneontology.org/amigo/term/GO:0016247
response to estradiol	Gene Ontology	GO:0032355	4	21	0.00963603	0.0738097	PTN|SFRP1|MYOG|SLC6A4	http://amigo.geneontology.org/amigo/term/GO:0032355
regulation of regulated secretory pathway	Gene Ontology	GO:1903305	4	21	0.00963603	0.0738097	SYT1|KCNB1|NLGN1|SYN1	http://amigo.geneontology.org/amigo/term/GO:1903305
endoplasmic reticulum	Gene Ontology	GO:0005783	14	188	0.00989809	0.075556	AOC3|PYGM|COL11A1|JPH3|AGMO|RDH5|CA4|JPH2|P4HA3|COL22A1|COL9A1|S100A7|PDE3B|VWF	http://amigo.geneontology.org/amigo/term/GO:0005783
positive regulation of neuron projection development	Gene Ontology	GO:0010976	6	48	0.00999343	0.0761527	DMD|CRABP2|METRN|EZH2|UNC13A|RIMS2	http://amigo.geneontology.org/amigo/term/GO:0010976
positive regulation of nervous system process	Gene Ontology	GO:0031646	5	34	0.0101011	0.0768414	NLGN1|NTSR1|RELN|RIMS2|TNR	http://amigo.geneontology.org/amigo/term/GO:0031646
macroautophagy	Gene Ontology	GO:0016236	8	80	0.0104378	0.0792668	MYOM1|LIX1|CFD|SLC22A3|CCDC36|PDK4|SCN1A|HIST1H3J	http://amigo.geneontology.org/amigo/term/GO:0016236
nuclear outer membrane-endoplasmic reticulum membrane network	Gene Ontology	GO:0042175	12	152	0.0108814	0.081528	FAM57B|ACSL1|APOB|DST|DGAT2|JPH2|JPH3|DDN|TMEM178A|SPTSSB|TYRO3|CAV1	http://amigo.geneontology.org/amigo/term/GO:0042175
regulation of tube diameter	Gene Ontology	GO:0035296	3	11	0.0108856	0.081528	ADRB2|ATP1A2|SLC6A4	http://amigo.geneontology.org/amigo/term/GO:0035296
mesodermal cell differentiation	Gene Ontology	GO:0048333	3	11	0.0108856	0.081528	KLF4|TRIM15|PAX2	http://amigo.geneontology.org/amigo/term/GO:0048333
transforming growth factor beta receptor binding	Gene Ontology	GO:0005160	3	11	0.0108856	0.081528	TGFBR3|GDF15|BMP8A	http://amigo.geneontology.org/amigo/term/GO:0005160
developmental induction	Gene Ontology	GO:0031128	3	11	0.0108856	0.081528	BMP2|FGF1|SIX3	http://amigo.geneontology.org/amigo/term/GO:0031128
regulation of ventricular cardiac muscle cell membrane repolarization	Gene Ontology	GO:0060307	3	11	0.0108856	0.081528	KCNE1|SCN5A|CAV3	http://amigo.geneontology.org/amigo/term/GO:0060307
positive regulation of epithelial cell differentiation	Gene Ontology	GO:0030858	3	11	0.0108856	0.081528	FOXJ1|CLDN5|LHX1	http://amigo.geneontology.org/amigo/term/GO:0030858
DNA-binding transcription factor activity, RNA polymerase II-specific	Gene Ontology	GO:0000981	6	49	0.010901	0.081528	HIF3A|ESR2|FEZF1|ALX4|HES6|NKX2-5	http://amigo.geneontology.org/amigo/term/GO:0000981
eye development	Gene Ontology	GO:0001654	6	49	0.010901	0.081528	PTN|LHX2|PRSS56|FZD4|BFSP2|MAB21L1	http://amigo.geneontology.org/amigo/term/GO:0001654
histone deacetylase binding	Gene Ontology	GO:0042826	4	22	0.0110858	0.0827702	FOXP3|MAGEA1|MYOCD|TOP2A	http://amigo.geneontology.org/amigo/term/GO:0042826
negative regulation of neuron apoptotic process	Gene Ontology	GO:0043524	5	35	0.0112268	0.0835418	KIF14|EN1|SNCB|ADAM8|MT3	http://amigo.geneontology.org/amigo/term/GO:0043524
response to interleukin-1	Gene Ontology	GO:0070555	5	35	0.0112268	0.0835418	CX3CL1|CCL11|SFRP1|PTGIS|FN1	http://amigo.geneontology.org/amigo/term/GO:0070555
hydrolase activity, acting on acid phosphorus-nitrogen bonds	Gene Ontology	GO:0016825	6	50	0.0118654	0.0877051	PRSS56|PCSK1|MASP1|PRSS1|AADAC|IGHEP1	http://amigo.geneontology.org/amigo/term/GO:0016825
transferase activity, transferring acyl groups other than amino-acyl groups	Gene Ontology	GO:0016747	6	50	0.0118654	0.0877051	DGAT2|IFNB1|HRASLS5|GLYAT|MOGAT1|PAFAH1B3	http://amigo.geneontology.org/amigo/term/GO:0016747
epithelial cell development	Gene Ontology	GO:0002064	6	50	0.0118654	0.0877051	SLITRK6|ESR2|INSM1|HN1|HOXA5|ADIPOQ	http://amigo.geneontology.org/amigo/term/GO:0002064
endosome membrane	Gene Ontology	GO:0010008	7	66	0.0122428	0.0903438	ANXA1|TYRP1|EPHB1|EPHA8|SYT5|CD300LG|KREMEN2	http://amigo.geneontology.org/amigo/term/GO:0010008
negative regulation of ion transport	Gene Ontology	GO:0043271	5	36	0.012435	0.091005	TRDN|KCNE1|HRH3|CASQ2|NTSR1	http://amigo.geneontology.org/amigo/term/GO:0043271
negative regulation of nervous system development	Gene Ontology	GO:0051961	5	36	0.012435	0.091005	SEZ6|GFAP|ISL2|ROBO2|LMX1A	http://amigo.geneontology.org/amigo/term/GO:0051961
cellular response to environmental stimulus	Gene Ontology	GO:0104004	5	36	0.012435	0.091005	TP63|PCK1|ATP1A2|AURKB|RAD51AP1	http://amigo.geneontology.org/amigo/term/GO:0104004
cardiac muscle tissue growth	Gene Ontology	GO:0055017	5	36	0.012435	0.091005	NRG1|TGFBR3|CCNB1|S1PR1|NKX2-5	http://amigo.geneontology.org/amigo/term/GO:0055017
positive regulation of vasculature development	Gene Ontology	GO:1904018	4	23	0.0126688	0.0916578	CCL11|LRG1|MYOCD|ADM2	http://amigo.geneontology.org/amigo/term/GO:1904018
positive regulation of transmembrane transport	Gene Ontology	GO:0034764	4	23	0.0126688	0.0916578	CXCL11|CXCL10|RELN|NTSR1	http://amigo.geneontology.org/amigo/term/GO:0034764
positive regulation of binding	Gene Ontology	GO:0051099	4	23	0.0126688	0.0916578	PDX1|CDCA5|EBF2|CAV1	http://amigo.geneontology.org/amigo/term/GO:0051099
somite development	Gene Ontology	GO:0061053	4	23	0.0126688	0.0916578	HN1|LHX1|LEF1|MEOX1	http://amigo.geneontology.org/amigo/term/GO:0061053
leading edge membrane	Gene Ontology	GO:0031256	4	23	0.0126688	0.0916578	BMX|ROBO2|PACSIN1|OPRD1	http://amigo.geneontology.org/amigo/term/GO:0031256
tubulin binding	Gene Ontology	GO:0015631	6	51	0.0128883	0.0929423	GTSE1|KIF18A|STARD9|S100A9|S100A8|KIFC1	http://amigo.geneontology.org/amigo/term/GO:0015631
transport vesicle	Gene Ontology	GO:0030133	6	51	0.0128883	0.0929423	RAB26|CGA|CHGA|SYT4|SYT5|IL33	http://amigo.geneontology.org/amigo/term/GO:0030133
transition metal ion binding	Gene Ontology	GO:0046914	15	215	0.013084	0.0942007	CA9|TRIM15|TRIM72|FN1|AGMO|USP44|CPB1|ADAMDEC1|CA3|CYP21A2|FHL1|NR4A3|TK1|ADAMTS20|SOD3	http://amigo.geneontology.org/amigo/term/GO:0046914
response to anesthetic	Gene Ontology	GO:0072347	3	12	0.0132662	0.0942877	LPHN3|FOSB|HTR2A	http://amigo.geneontology.org/amigo/term/GO:0072347
replication fork	Gene Ontology	GO:0005657	3	12	0.0132662	0.0942877	CDC45|PIF1|MCM10	http://amigo.geneontology.org/amigo/term/GO:0005657
lipid kinase activity	Gene Ontology	GO:0001727	3	12	0.0132662	0.0942877	EEF1A2|EPHA8|KIT	http://amigo.geneontology.org/amigo/term/GO:0001727
transmitter-gated channel activity	Gene Ontology	GO:0022835	3	12	0.0132662	0.0942877	GRIN2B|GRIA4|HTR3A	http://amigo.geneontology.org/amigo/term/GO:0022835
postsynapse organization	Gene Ontology	GO:0099173	3	12	0.0132662	0.0942877	PTN|CDH2|EPHB1	http://amigo.geneontology.org/amigo/term/GO:0099173
calcium-dependent protein binding	Gene Ontology	GO:0048306	3	12	0.0132662	0.0942877	TNNT3|MASP1|TNNI3	http://amigo.geneontology.org/amigo/term/GO:0048306
negative regulation of programmed cell death	Gene Ontology	GO:0043069	13	176	0.0133808	0.0949504	PROKR1|PLK1|CRYAB|GABRA5|HN1|POU4F1|AURKA|SCRT2|CCL21|PDX1|HSH2D|FGG|NKX2-5	http://amigo.geneontology.org/amigo/term/GO:0043069
establishment of protein localization to extracellular region	Gene Ontology	GO:0035592	8	84	0.0134332	0.0951696	TNFRSF9|CLEC6A|BRSK2|ACVR1C|GBP5|CD36|RIMS2|NKX6-1	http://amigo.geneontology.org/amigo/term/GO:0035592
regulation of ossification	Gene Ontology	GO:0030278	5	37	0.0137281	0.097104	PKDCC|CEBPA|BMP2|HOXA2|ZBTB16	http://amigo.geneontology.org/amigo/term/GO:0030278
endoplasmic reticulum membrane	Gene Ontology	GO:0005789	12	158	0.0141523	0.0997863	FMO2|NR3C2|ILDR2|CYP2A13|MGLL|RYR3|CYP2B6|SHISA3|SRD5A2|MMP27|TMEM132A|DST	http://amigo.geneontology.org/amigo/term/GO:0005789
potassium channel activity	Gene Ontology	GO:0005267	4	24	0.0143891	0.100497	KCNK9|CAV3|KCNF1|KCNH2	http://amigo.geneontology.org/amigo/term/GO:0005267
regulation of lipid localization	Gene Ontology	GO:1905952	4	24	0.0143891	0.100497	GALR1|CETP|APOC3|ADIPOQ	http://amigo.geneontology.org/amigo/term/GO:1905952
sarcolemma	Gene Ontology	GO:0042383	4	24	0.0143891	0.100497	AKAP6|FXYD1|ABCC9|TRIM72	http://amigo.geneontology.org/amigo/term/GO:0042383
I band	Gene Ontology	GO:0031674	4	24	0.0143891	0.100497	SCT|DES|SLC4A1|ACTN2	http://amigo.geneontology.org/amigo/term/GO:0031674
positive regulation of cell growth	Gene Ontology	GO:0030307	4	24	0.0143891	0.100497	ADAM18|F2|HIST1H1B|CRABP2	http://amigo.geneontology.org/amigo/term/GO:0030307
regulation of biological process	Gene Ontology	GO:0050789	178	4270	0.0149335	0.103972	HIST1H4A|CCNE1|GHR|FXYD1|CD34|JPH3|TIMP4|OR2L3|NKX2-2|ROS1|ITPKA|LHX2|TMEM100|PALM2-AKAP2|GPR182|SSX1|NTRK2|DSC1|PROKR1|ESPL1|SCN4A|MT1H|IRX6|MAS1L|PI16|ZIC1|ENPP2|KCNF1|POSTN|FOXH1|BRINP3|ELFN2|SGK2|NRG2|SYT1|SYT4|ADAM8|VIP|GNG2|DPP6|PID1|AKAP12|TAS1R3|PAK7|GPR17|DMRT2|DMD|CCL7|CD1A|NUAK2|CELF3|NTSR1|PROL1|ZNF280A|NDRG2|FAM13A|LHCGR|NEK2|USP44|AMER3|CSRNP3|CYP26B1|GRM8|CEACAM6|DLX4|ANGPT1|CLDN5|…	http://amigo.geneontology.org/amigo/term/GO:0050789
dendritic tree	Gene Ontology	GO:0097447	7	69	0.0150564	0.104663	KCNJ4|GLRA4|CPLX2|TH|KLHL1|IGF2BP1|GNG13	http://amigo.geneontology.org/amigo/term/GO:0097447
glycosaminoglycan metabolic process	Gene Ontology	GO:0030203	5	38	0.0151087	0.104794	HMMR|HAS3|OGN|CHST9|CHST6	http://amigo.geneontology.org/amigo/term/GO:0030203
adherens junction	Gene Ontology	GO:0005912	8	86	0.0151461	0.104794	ANXA1|ACTN2|SYNM|HN1|LPL|SCT|TNS1|CDH2	http://amigo.geneontology.org/amigo/term/GO:0005912
embryonic organ development	Gene Ontology	GO:0048568	14	199	0.0151708	0.104801	SLITRK6|GBX2|TGFBR2|CDKN1C|OTX1|KIT|SPRY2|HOXA5|HOXA2|PAX2|DLX5|GATA4|SIX3|ALDH1A2	http://amigo.geneontology.org/amigo/term/GO:0048568
caveola	Gene Ontology	GO:0005901	3	13	0.0159194	0.108954	LIPE|CAV2|CAV3	http://amigo.geneontology.org/amigo/term/GO:0005901
voltage-gated potassium channel complex	Gene Ontology	GO:0008076	3	13	0.0159194	0.108954	HCN2|ABCC9|KCNJ6	http://amigo.geneontology.org/amigo/term/GO:0008076
lipid transporter activity	Gene Ontology	GO:0005319	3	13	0.0159194	0.108954	PPARG|RBP4|SLCO1A2	http://amigo.geneontology.org/amigo/term/GO:0005319
regulation of circadian rhythm	Gene Ontology	GO:0042752	3	13	0.0159194	0.108954	PPARG|NPY2R|TOP2A	http://amigo.geneontology.org/amigo/term/GO:0042752
regulation of cell fate commitment	Gene Ontology	GO:0010453	3	13	0.0159194	0.108954	PAX7|IL12B|DKK1	http://amigo.geneontology.org/amigo/term/GO:0010453
protein homooligomerization	Gene Ontology	GO:0051260	12	161	0.0160447	0.109643	CALHM1|P2RX6|ACACB|SYT1|KCNG3|CAT|GPX3|SCARA5|RAD51|TK1|KCNA1|CAV1	http://amigo.geneontology.org/amigo/term/GO:0051260
spindle pole	Gene Ontology	GO:0000922	4	25	0.0162501	0.110876	WDR62|AUNIP|SPAG5|CDC20	http://amigo.geneontology.org/amigo/term/GO:0000922
respiratory system development	Gene Ontology	GO:0060541	6	54	0.0163245	0.111041	CYP1A2|SOX11|ASCL1|HOXA5|MYOCD|PROX1	http://amigo.geneontology.org/amigo/term/GO:0060541
camera-type eye development	Gene Ontology	GO:0043010	6	54	0.0163245	0.111041	EPHB1|CDKN1C|SOX11|MAB21L1|BMPR1B|KLF4	http://amigo.geneontology.org/amigo/term/GO:0043010
external side of plasma membrane	Gene Ontology	GO:0009897	5	39	0.0165791	0.112429	TGFBR3|TGFBR2|UMODL1|CXCR5|NLGN1	http://amigo.geneontology.org/amigo/term/GO:0009897
endothelium development	Gene Ontology	GO:0003158	5	39	0.0165791	0.112429	PTN|APOLD1|TNMD|BMPER|PDE2A	http://amigo.geneontology.org/amigo/term/GO:0003158
regulation of anatomical structure morphogenesis	Gene Ontology	GO:0022603	19	306	0.0169333	0.114655	ANXA1|CCL11|TMEM100|PROK1|CCL7|CRABP2|METRN|CXCL9|PALM2-AKAP2|CD34|SOX17|HOXC11|VIL1|SCX|PAX2|CXCL13|PLXNA4|CTHRC1|NKX6-1	http://amigo.geneontology.org/amigo/term/GO:0022603
negative regulation of signaling	Gene Ontology	GO:0023057	16	243	0.0169919	0.114837	UTS2|TRDN|NEUROD1|BMP2|TBX20|EGR1|FBN2|TCF21|CYP26B1|SRMS|MYOC|APCDD1|GNAI1|SLC24A2|C6|CIDEA	http://amigo.geneontology.org/amigo/term/GO:0023057
biomineral tissue development	Gene Ontology	GO:0031214	7	71	0.0171701	0.115378	PTH1R|BMP2|S1PR1|KL|BMPR1B|GPC3|KLK4	http://amigo.geneontology.org/amigo/term/GO:0031214
transmembrane receptor protein serine/threonine kinase signaling pathway	Gene Ontology	GO:0007178	7	71	0.0171701	0.115378	BMP8A|TBX20|EGR1|TMPRSS6|INHBA|MYOCD|DACT2	http://amigo.geneontology.org/amigo/term/GO:0007178
cellular response to drug	Gene Ontology	GO:0035690	6	55	0.0175977	0.117894	AOC1|P2RY12|GNG2|HTR1D|DPEP1|ADIPOQ	http://amigo.geneontology.org/amigo/term/GO:0035690
canonical Wnt signaling pathway	Gene Ontology	GO:0060070	6	55	0.0175977	0.117894	HOXB9|KLF4|SOX17|GPC3|CDH2|FGF2	http://amigo.geneontology.org/amigo/term/GO:0060070
basolateral plasma membrane	Gene Ontology	GO:0016323	5	40	0.0181414	0.120807	PTH1R|CD300LG|CD1A|KCNJ16|KCNJ4	http://amigo.geneontology.org/amigo/term/GO:0016323
transforming growth factor beta receptor signaling pathway	Gene Ontology	GO:0007179	5	40	0.0181414	0.120807	CDKN1C|FOXH1|FBN2|MYOCD|CAV3	http://amigo.geneontology.org/amigo/term/GO:0007179
positive regulation of macroautophagy	Gene Ontology	GO:0016239	4	26	0.0182552	0.1212	PGK2|HAPLN1|MYLK|PHYHIP	http://amigo.geneontology.org/amigo/term/GO:0016239
cytoplasmic side of membrane	Gene Ontology	GO:0098562	4	26	0.0182552	0.1212	GNG4|GNAT3|CAV2|SPPL2C	http://amigo.geneontology.org/amigo/term/GO:0098562
regulation of molecular function	Gene Ontology	GO:0065009	58	1221	0.0184996	0.122639	MAD2L1|TRIM15|CLPSL1|CLPS|SPRY2|PRKAR2B|UCN3|TXNIP|DMD|NLGN1|SPTBN1|IQGAP3|SPX|IRG1|FZD4|TP63|MT3|CCNE1|VIP|DSC1|ARHGAP20|ZIC2|PPP1R12B|CASC5|PTTG1|GDF15|EDN2|SPOCD1|TGFBR3|TRDN|IL36RN|IGF1|A2ML1|PTN|CENPE|CARD17|CX3CL1|NPY2R|EBF2|MAS1|PAX2|CCNA2|FGFR3|FGF1|BMP3|SEMA3D|IL20|IFI6|SYNGR3|SLC7A14|PIF1|ADRB3|SNCB|GRIN2D|CARTPT|MMD|UBE2S|CTHRC1	http://amigo.geneontology.org/amigo/term/GO:0065009
voltage-gated potassium channel activity	Gene Ontology	GO:0005249	3	14	0.0188483	0.12384	KCNJ3|KCNG3|KCNA1	http://amigo.geneontology.org/amigo/term/GO:0005249
flavin adenine dinucleotide binding	Gene Ontology	GO:0050660	3	14	0.0188483	0.12384	AOX1|MAOA|SQLE	http://amigo.geneontology.org/amigo/term/GO:0050660
cellular oxidant detoxification	Gene Ontology	GO:0098869	3	14	0.0188483	0.12384	EPO|CD36|MT3	http://amigo.geneontology.org/amigo/term/GO:0098869
regulation of pathway-restricted SMAD protein phosphorylation	Gene Ontology	GO:0060393	3	14	0.0188483	0.12384	INHBA|BMP3|BMP2	http://amigo.geneontology.org/amigo/term/GO:0060393
condensed chromosome kinetochore	Gene Ontology	GO:0000777	3	14	0.0188483	0.12384	SKA3|NEK2|SPC25	http://amigo.geneontology.org/amigo/term/GO:0000777
negative regulation of cell cycle G1/S phase transition	Gene Ontology	GO:1902807	3	14	0.0188483	0.12384	CDK1|EZH2|FHL1	http://amigo.geneontology.org/amigo/term/GO:1902807
hydrolase activity, acting on acid anhydrides	Gene Ontology	GO:0016817	14	206	0.0195062	0.127974	TUBA3E|AGAP11|KIF18A|GBP5|KL|KIF14|KIF15|ADRB2|P2RY12|CDC45|CCL20|RUNDC3A|UHRF1|KIF20A	http://amigo.geneontology.org/amigo/term/GO:0016817
bone development	Gene Ontology	GO:0060348	5	41	0.0197978	0.129628	COL2A1|BMPR1B|IGF1|PAX1|TGFBR2	http://amigo.geneontology.org/amigo/term/GO:0060348
positive regulation of cell death	Gene Ontology	GO:0010942	15	227	0.0198169	0.129628	IL19|SFRP1|BMP2|MELK|NR4A3|HOXA5|ADRB2|HBB|IL6|HCAR2|BMPR1B|PYDC1|ZSWIM2|GSN|CAV1	http://amigo.geneontology.org/amigo/term/GO:0010942
vasculogenesis	Gene Ontology	GO:0001570	4	27	0.0204071	0.133097	TGFBR2|TMEM100|FZD4|CAV1	http://amigo.geneontology.org/amigo/term/GO:0001570
fibroblast growth factor receptor signaling pathway	Gene Ontology	GO:0008543	4	27	0.0204071	0.133097	FGF5|FGF21|KLB|KL	http://amigo.geneontology.org/amigo/term/GO:0008543
positive regulation of cellular catabolic process	Gene Ontology	GO:0031331	8	92	0.0212294	0.134913	CEBPA|IGF1|SH3D19|MYLK|ADAM8|SLCO1A2|ABCD2|HAPLN1	http://amigo.geneontology.org/amigo/term/GO:0031331
GTPase complex	Gene Ontology	GO:1905360	2	5	0.0217943	0.134913	GNAT3|GNAI1	http://amigo.geneontology.org/amigo/term/GO:1905360
positive regulation of vasculogenesis	Gene Ontology	GO:2001214	2	5	0.0217943	0.134913	TMEM100|CD34	http://amigo.geneontology.org/amigo/term/GO:2001214
lipoprotein particle receptor binding	Gene Ontology	GO:0070325	2	5	0.0217943	0.134913	MRAP|DKK1	http://amigo.geneontology.org/amigo/term/GO:0070325
ERBB2 signaling pathway	Gene Ontology	GO:0038128	2	5	0.0217943	0.134913	NRG1|NRG2	http://amigo.geneontology.org/amigo/term/GO:0038128
DNA topoisomerase activity	Gene Ontology	GO:0003916	2	5	0.0217943	0.134913	UHRF1|TOP2A	http://amigo.geneontology.org/amigo/term/GO:0003916
negative regulation of release of sequestered calcium ion into cytosol	Gene Ontology	GO:0051280	2	5	0.0217943	0.134913	CASQ2|NTSR1	http://amigo.geneontology.org/amigo/term/GO:0051280
cell proliferation in external granule layer	Gene Ontology	GO:0021924	2	5	0.0217943	0.134913	GPR37L1|SLC6A4	http://amigo.geneontology.org/amigo/term/GO:0021924
steroid hydroxylase activity	Gene Ontology	GO:0008395	2	5	0.0217943	0.134913	CYP2A7|CYP2B6	http://amigo.geneontology.org/amigo/term/GO:0008395
semaphorin receptor binding	Gene Ontology	GO:0030215	2	5	0.0217943	0.134913	SEMA3D|SEMA3G	http://amigo.geneontology.org/amigo/term/GO:0030215
positive regulation of sequestering of calcium ion	Gene Ontology	GO:0051284	2	5	0.0217943	0.134913	CASQ2|NTSR1	http://amigo.geneontology.org/amigo/term/GO:0051284
negative regulation of nitric oxide metabolic process	Gene Ontology	GO:1904406	2	5	0.0217943	0.134913	PTGIS|CAV1	http://amigo.geneontology.org/amigo/term/GO:1904406
establishment of protein localization to chromosome	Gene Ontology	GO:0070199	2	5	0.0217943	0.134913	TERT|HIST1H1B	http://amigo.geneontology.org/amigo/term/GO:0070199
epithelial cell differentiation involved in prostate gland development	Gene Ontology	GO:0060742	2	5	0.0217943	0.134913	PSAPL1|HOXB13	http://amigo.geneontology.org/amigo/term/GO:0060742
cyclin-dependent protein serine/threonine kinase regulator activity	Gene Ontology	GO:0016538	2	5	0.0217943	0.134913	CDKN2A|CCNE1	http://amigo.geneontology.org/amigo/term/GO:0016538
acetylcholine binding	Gene Ontology	GO:0042166	2	5	0.0217943	0.134913	CHRNA4|CHRNA9	http://amigo.geneontology.org/amigo/term/GO:0042166
1-phosphatidylinositol-3-kinase activity	Gene Ontology	GO:0016303	2	5	0.0217943	0.134913	FGF4|KL	http://amigo.geneontology.org/amigo/term/GO:0016303
negative regulation of nitric oxide biosynthetic process	Gene Ontology	GO:0045019	2	5	0.0217943	0.134913	CD34|CAV1	http://amigo.geneontology.org/amigo/term/GO:0045019
regulation of integrin activation	Gene Ontology	GO:0033623	2	5	0.0217943	0.134913	KIF14|CXCL13	http://amigo.geneontology.org/amigo/term/GO:0033623
heart valve development	Gene Ontology	GO:0003170	2	5	0.0217943	0.134913	TBX20|SCX	http://amigo.geneontology.org/amigo/term/GO:0003170
neuropeptide receptor binding	Gene Ontology	GO:0071855	2	5	0.0217943	0.134913	EDN3|EDN2	http://amigo.geneontology.org/amigo/term/GO:0071855
hyaluronan catabolic process	Gene Ontology	GO:0030214	2	5	0.0217943	0.134913	CEMIP|FGF2	http://amigo.geneontology.org/amigo/term/GO:0030214
ryanodine-sensitive calcium-release channel activity	Gene Ontology	GO:0005219	2	5	0.0217943	0.134913	JPH2|RYR3	http://amigo.geneontology.org/amigo/term/GO:0005219
opioid receptor signaling pathway	Gene Ontology	GO:0038003	2	5	0.0217943	0.134913	OPRD1|NPBWR1	http://amigo.geneontology.org/amigo/term/GO:0038003
complex of collagen trimers	Gene Ontology	GO:0098644	2	5	0.0217943	0.134913	COL2A1|TNXB	http://amigo.geneontology.org/amigo/term/GO:0098644
syntaxin-1 binding	Gene Ontology	GO:0017075	2	5	0.0217943	0.134913	SYT1|FHL5	http://amigo.geneontology.org/amigo/term/GO:0017075
tendon development	Gene Ontology	GO:0035989	2	5	0.0217943	0.134913	TNMD|SCX	http://amigo.geneontology.org/amigo/term/GO:0035989
urea transmembrane transport	Gene Ontology	GO:0071918	2	5	0.0217943	0.134913	AQP7|SLC14A2	http://amigo.geneontology.org/amigo/term/GO:0071918
heparan sulfate sulfotransferase activity	Gene Ontology	GO:0034483	2	5	0.0217943	0.134913	HS3ST5|HS6ST3	http://amigo.geneontology.org/amigo/term/GO:0034483
oxidoreductase activity, acting on paired donors, with incorporation or reduction of molecular oxygen, reduced flavin or flavoprotein as one donor, and incorporation of one atom of oxygen	Gene Ontology	GO:0016712	2	5	0.0217943	0.134913	CYP1A2|CYP2B6	http://amigo.geneontology.org/amigo/term/GO:0016712
inward rectifier potassium channel activity	Gene Ontology	GO:0005242	2	5	0.0217943	0.134913	KCNJ6|CAV1	http://amigo.geneontology.org/amigo/term/GO:0005242
positive regulation of ossification	Gene Ontology	GO:0045778	3	15	0.0220546	0.134913	DLX5|CTHRC1|SOX11	http://amigo.geneontology.org/amigo/term/GO:0045778
mesoderm formation	Gene Ontology	GO:0001707	3	15	0.0220546	0.134913	INHBA|LEF1|TLX2	http://amigo.geneontology.org/amigo/term/GO:0001707
exopeptidase activity	Gene Ontology	GO:0008238	3	15	0.0220546	0.134913	AQPEP|CPA2|HPN	http://amigo.geneontology.org/amigo/term/GO:0008238
ammonium transport	Gene Ontology	GO:0015696	3	15	0.0220546	0.134913	RHBG|SLC44A4|SLC22A3	http://amigo.geneontology.org/amigo/term/GO:0015696
positive regulation of blood circulation	Gene Ontology	GO:1903524	3	15	0.0220546	0.134913	EDN3|SCN5A|TACR1	http://amigo.geneontology.org/amigo/term/GO:1903524
phosphatidylinositol-3-phosphate biosynthetic process	Gene Ontology	GO:0036092	3	15	0.0220546	0.134913	CFD|PIK3C2G|FGF1	http://amigo.geneontology.org/amigo/term/GO:0036092
growth factor binding	Gene Ontology	GO:0019838	3	15	0.0220546	0.134913	TGFBR2|IGFALS|KL	http://amigo.geneontology.org/amigo/term/GO:0019838
regulation of protein tyrosine kinase activity	Gene Ontology	GO:0061097	3	15	0.0220546	0.134913	ADAM18|GPRC5A|DOK7	http://amigo.geneontology.org/amigo/term/GO:0061097
cortical cytoskeleton	Gene Ontology	GO:0030863	3	15	0.0220546	0.134913	CAPZA3|ANLN|GYS2	http://amigo.geneontology.org/amigo/term/GO:0030863
signal transduction in absence of ligand	Gene Ontology	GO:0038034	3	15	0.0220546	0.134913	IFI6|CX3CL1|COL2A1	http://amigo.geneontology.org/amigo/term/GO:0038034
negative regulation of extrinsic apoptotic signaling pathway	Gene Ontology	GO:2001237	3	15	0.0220546	0.134913	NRG1|TERT|COL2A1	http://amigo.geneontology.org/amigo/term/GO:2001237
cellular protein-containing complex assembly	Gene Ontology	GO:0034622	15	231	0.0225629	0.137643	CAPZA3|CALY|CENPI|HIST1H4D|HMP19|CENPE|CASQ2|CAPS|HIST2H3D|CCDC151|HIST1H3F|NRG1|CADPS|HIST1H3I|HIST1H4I	http://amigo.geneontology.org/amigo/term/GO:0034622
nephron epithelium morphogenesis	Gene Ontology	GO:0072088	4	28	0.0227085	0.137962	LHX1|GPC3|SIX2|PAX2	http://amigo.geneontology.org/amigo/term/GO:0072088
protein binding, bridging	Gene Ontology	GO:0030674	4	28	0.0227085	0.137962	ANXA1|AKAP6|ANK2|MAPK8IP2	http://amigo.geneontology.org/amigo/term/GO:0030674
actin cytoskeleton	Gene Ontology	GO:0015629	7	76	0.0233521	0.141203	HSPB7|DMD|ONECUT2|CRYAB|GYS2|NCAPG|SCT	http://amigo.geneontology.org/amigo/term/GO:0015629
intrinsic apoptotic signaling pathway	Gene Ontology	GO:0097193	6	59	0.0233693	0.141203	LGALS12|E2F1|IL19|CASP12|PDX1|RAX	http://amigo.geneontology.org/amigo/term/GO:0097193
Golgi vesicle transport	Gene Ontology	GO:0048193	6	59	0.0233693	0.141203	F2|RAB26|KIF18A|KIF15|KIF11|KIF2C	http://amigo.geneontology.org/amigo/term/GO:0048193
purine nucleoside binding	Gene Ontology	GO:0001883	6	59	0.0233693	0.141203	TPX2|PCK1|TUBB4A|ACSM5|MOCS1|GNAT3	http://amigo.geneontology.org/amigo/term/GO:0001883
chromatin binding	Gene Ontology	GO:0003682	7	77	0.0247506	0.149345	TP63|EBF2|RAD51|CDCA5|GATA5|CBX2|TOP2A	http://amigo.geneontology.org/amigo/term/GO:0003682
postsynapse	Gene Ontology	GO:0098794	5	44	0.0253497	0.151423	CHRNA4|MT3|GABBR2|PRKAR2B|SYN1	http://amigo.geneontology.org/amigo/term/GO:0098794
regulation of binding	Gene Ontology	GO:0051098	5	44	0.0253497	0.151423	NRG1|LHX2|NEUROD1|CTHRC1|AURKA	http://amigo.geneontology.org/amigo/term/GO:0051098
axon terminus	Gene Ontology	GO:0043679	3	16	0.0255388	0.151423	DRP2|SYT1|SYN1	http://amigo.geneontology.org/amigo/term/GO:0043679
bicellular tight junction	Gene Ontology	GO:0005923	3	16	0.0255388	0.151423	CLDN19|ADCYAP1R1|JAM2	http://amigo.geneontology.org/amigo/term/GO:0005923
regulation of myeloid cell apoptotic process	Gene Ontology	GO:0033032	3	16	0.0255388	0.151423	ANXA1|HCAR2|CLEC5A	http://amigo.geneontology.org/amigo/term/GO:0033032
negative regulation of cellular response to transforming growth factor beta stimulus	Gene Ontology	GO:1903845	3	16	0.0255388	0.151423	TGFBR3|ONECUT2|CAV2	http://amigo.geneontology.org/amigo/term/GO:1903845
ATP generation from ADP	Gene Ontology	GO:0006757	3	16	0.0255388	0.151423	PFKFB1|PGK2|GPD1	http://amigo.geneontology.org/amigo/term/GO:0006757
oxidoreductase activity, acting on paired donors, with incorporation or reduction of molecular oxygen, NAD(P)H as one donor, and incorporation of one atom of oxygen	Gene Ontology	GO:0016709	3	16	0.0255388	0.151423	CYP1A1|CAV3|CAV1	http://amigo.geneontology.org/amigo/term/GO:0016709
negative regulation of transforming growth factor beta receptor signaling pathway	Gene Ontology	GO:0030512	3	16	0.0255388	0.151423	TGFBR3|ONECUT2|CAV1	http://amigo.geneontology.org/amigo/term/GO:0030512
pathway-restricted SMAD protein phosphorylation	Gene Ontology	GO:0060389	3	16	0.0255388	0.151423	GDF15|BMP3|BMPER	http://amigo.geneontology.org/amigo/term/GO:0060389
mesonephric epithelium development	Gene Ontology	GO:0072163	6	61	0.0266811	0.157774	WT1|BMP2|ROBO2|FOXD1|BMPER|PAX2	http://amigo.geneontology.org/amigo/term/GO:0072163
vesicle membrane	Gene Ontology	GO:0012506	6	61	0.0266811	0.157774	CFD|SLC2A4|TMEM190|LAMP5|TH|CAV2	http://amigo.geneontology.org/amigo/term/GO:0012506
regulation of signal transduction	Gene Ontology	GO:0009966	54	1150	0.0267315	0.157862	STARD10|TGFBR3|TRIM15|CCL7|EPHA8|CHGA|CAT|DACT2|ADAM18|KREMEN2|MAGEA1|KL|GPRC5A|FGF5|IQGAP3|TMEM100|CGA|SOX11|EGR1|GPRASP1|NEURL1|S100A9|AURKA|ZSWIM2|NRG1|EDN3|CAV1|C6|RAX|FIGF|TGFBR2|NPR3|AURKB|LRG1|COL1A1|PTGIS|FOXD1|GRM4|TMPRSS6|MAS1|F10|CRB2|SERPINA12|SEZ6|GPR37L1|AKAP6|SFRP1|CCL14|DKK1|CD80|PID1|CD19|ESM1|PAK3	http://amigo.geneontology.org/amigo/term/GO:0009966
Golgi apparatus	Gene Ontology	GO:0005794	14	216	0.0272426	0.159483	APOB|PROZ|F7|SH3D19|NDST4|MUC21|CRYAB|PDE3B|HN1|OGN|IGFBP6|SYN1|CAV3|B3GALT1	http://amigo.geneontology.org/amigo/term/GO:0005794
regulation of cation transmembrane transport	Gene Ontology	GO:1904062	5	45	0.0274002	0.159483	CXCL10|CEMIP|FHL1|SCN3B|DHRS7C	http://amigo.geneontology.org/amigo/term/GO:1904062
intermediate filament cytoskeleton	Gene Ontology	GO:0045111	5	45	0.0274002	0.159483	KRT38|CASP14|INA|KRT37|KRT2	http://amigo.geneontology.org/amigo/term/GO:0045111
cellular response to organic cyclic compound	Gene Ontology	GO:0071407	12	175	0.0274838	0.159483	WT1|CCNB1|KCNE1|SLC6A4|CCNE1|CEBPA|P2RY12|PER1|IGF1|HTR2A|CASQ2|CAV2	http://amigo.geneontology.org/amigo/term/GO:0071407
positive regulation of cell division	Gene Ontology	GO:0051781	4	30	0.0277677	0.159483	FGF5|RXFP3|FGF2|MRGPRX2	http://amigo.geneontology.org/amigo/term/GO:0051781
neuron spine	Gene Ontology	GO:0044309	4	30	0.0277677	0.159483	ITPKA|NEURL1|ATP1A3|NLGN1	http://amigo.geneontology.org/amigo/term/GO:0044309
negative regulation of epithelial cell apoptotic process	Gene Ontology	GO:1904036	2	6	0.0284084	0.159483	FGG|ANGPT1	http://amigo.geneontology.org/amigo/term/GO:1904036
renal vesicle morphogenesis	Gene Ontology	GO:0072077	2	6	0.0284084	0.159483	SIX2|PAX2	http://amigo.geneontology.org/amigo/term/GO:0072077
lipoprotein particle binding	Gene Ontology	GO:0071813	2	6	0.0284084	0.159483	GPIHBP1|CD36	http://amigo.geneontology.org/amigo/term/GO:0071813
negative regulation of catecholamine secretion	Gene Ontology	GO:0033604	2	6	0.0284084	0.159483	CGA|CHGA	http://amigo.geneontology.org/amigo/term/GO:0033604
organelle localization by membrane tethering	Gene Ontology	GO:0140056	2	6	0.0284084	0.159483	SYT1|FHL5	http://amigo.geneontology.org/amigo/term/GO:0140056
positive regulation of telomere maintenance via telomere lengthening	Gene Ontology	GO:1904358	2	6	0.0284084	0.159483	MAPK15|AURKB	http://amigo.geneontology.org/amigo/term/GO:1904358
bone trabecula morphogenesis	Gene Ontology	GO:0061430	2	6	0.0284084	0.159483	FBN2|COL1A1	http://amigo.geneontology.org/amigo/term/GO:0061430
divalent inorganic cation transmembrane transporter activity	Gene Ontology	GO:0072509	2	6	0.0284084	0.159483	SLC8A2|SLC24A2	http://amigo.geneontology.org/amigo/term/GO:0072509
regulation of gamma-aminobutyric acid secretion	Gene Ontology	GO:0014052	2	6	0.0284084	0.159483	TRH|NTSR1	http://amigo.geneontology.org/amigo/term/GO:0014052
positive regulation of calcium ion transmembrane transport	Gene Ontology	GO:1904427	2	6	0.0284084	0.159483	CXCL9|AKAP6	http://amigo.geneontology.org/amigo/term/GO:1904427
positive regulation of cyclin-dependent protein kinase activity	Gene Ontology	GO:1904031	2	6	0.0284084	0.159483	PROX1|CDC6	http://amigo.geneontology.org/amigo/term/GO:1904031
positive regulation of blood pressure	Gene Ontology	GO:0045777	2	6	0.0284084	0.159483	ADRA1A|OXTR	http://amigo.geneontology.org/amigo/term/GO:0045777
ureter development	Gene Ontology	GO:0072189	2	6	0.0284084	0.159483	RET|ALDH1A2	http://amigo.geneontology.org/amigo/term/GO:0072189
cell aggregation	Gene Ontology	GO:0098743	2	6	0.0284084	0.159483	OTOR|FGF4	http://amigo.geneontology.org/amigo/term/GO:0098743
cellular response to estradiol stimulus	Gene Ontology	GO:0071392	2	6	0.0284084	0.159483	MYOG|CRHBP	http://amigo.geneontology.org/amigo/term/GO:0071392
postsynaptic neurotransmitter receptor activity	Gene Ontology	GO:0098960	2	6	0.0284084	0.159483	CHRNA6|HRH3	http://amigo.geneontology.org/amigo/term/GO:0098960
microtubule end	Gene Ontology	GO:1990752	2	6	0.0284084	0.159483	MAST1|KIF18B	http://amigo.geneontology.org/amigo/term/GO:1990752
regulation of gonad development	Gene Ontology	GO:1905939	2	6	0.0284084	0.159483	WT1|DMRT1	http://amigo.geneontology.org/amigo/term/GO:1905939
ossification involved in bone maturation	Gene Ontology	GO:0043931	2	6	0.0284084	0.159483	LEP|IGF1	http://amigo.geneontology.org/amigo/term/GO:0043931
cardiac muscle cell apoptotic process	Gene Ontology	GO:0010659	2	6	0.0284084	0.159483	GNGT1|NKX2-5	http://amigo.geneontology.org/amigo/term/GO:0010659
AMPA glutamate receptor complex	Gene Ontology	GO:0032281	2	6	0.0284084	0.159483	GRIA2|OLFM3	http://amigo.geneontology.org/amigo/term/GO:0032281
chemokine (C-X-C motif) ligand 2 production	Gene Ontology	GO:0072567	2	6	0.0284084	0.159483	POSTN|KLF4	http://amigo.geneontology.org/amigo/term/GO:0072567
E-box binding	Gene Ontology	GO:0070888	2	6	0.0284084	0.159483	NEUROD1|SCX	http://amigo.geneontology.org/amigo/term/GO:0070888
centrosome localization	Gene Ontology	GO:0051642	2	6	0.0284084	0.159483	ASPM|AURKA	http://amigo.geneontology.org/amigo/term/GO:0051642
animal organ maturation	Gene Ontology	GO:0048799	2	6	0.0284084	0.159483	LEP|BMP2	http://amigo.geneontology.org/amigo/term/GO:0048799
T-tubule	Gene Ontology	GO:0030315	2	6	0.0284084	0.159483	KCNJ3|SCN1A	http://amigo.geneontology.org/amigo/term/GO:0030315
anchored component of plasma membrane	Gene Ontology	GO:0046658	2	6	0.0284084	0.159483	GPIHBP1|RAET1L	http://amigo.geneontology.org/amigo/term/GO:0046658
regulation of response to nutrient levels	Gene Ontology	GO:0032107	2	6	0.0284084	0.159483	SPX|LEP	http://amigo.geneontology.org/amigo/term/GO:0032107
presynaptic active zone	Gene Ontology	GO:0048786	2	6	0.0284084	0.159483	RIMS4|SYN1	http://amigo.geneontology.org/amigo/term/GO:0048786
triglyceride lipase activity	Gene Ontology	GO:0004806	2	6	0.0284084	0.159483	APOA1|APOC3	http://amigo.geneontology.org/amigo/term/GO:0004806
nitric oxide mediated signal transduction	Gene Ontology	GO:0007263	2	6	0.0284084	0.159483	MAFA|CD36	http://amigo.geneontology.org/amigo/term/GO:0007263
negative regulation of signal transduction	Gene Ontology	GO:0009968	16	260	0.0285851	0.160272	MMP9|ADH4|SFRP1|ESR2|FOXM1|PPARG|EGR1|RGS6|TNIP3|PER1|KLF4|IGFBP6|PDX1|APCDD1|CAV3|CREB3L1	http://amigo.geneontology.org/amigo/term/GO:0009968
cell-substrate adhesion	Gene Ontology	GO:0031589	8	98	0.0288662	0.161643	HN1|FN1|LYVE1|PTN|ECM2|KIF14|CCL28|ABI3BP	http://amigo.geneontology.org/amigo/term/GO:0031589
wound healing, spreading of cells	Gene Ontology	GO:0044319	3	17	0.0293002	0.163044	ADAM18|MME|MMP12	http://amigo.geneontology.org/amigo/term/GO:0044319
muscle cell migration	Gene Ontology	GO:0014812	3	17	0.0293002	0.163044	ANXA1|TACR1|ADIPOQ	http://amigo.geneontology.org/amigo/term/GO:0014812
detoxification	Gene Ontology	GO:0098754	3	17	0.0293002	0.163044	HBA1|EPO|MT3	http://amigo.geneontology.org/amigo/term/GO:0098754
sarcoplasmic reticulum	Gene Ontology	GO:0016529	3	17	0.0293002	0.163044	JPH2|JPH3|CASQ2	http://amigo.geneontology.org/amigo/term/GO:0016529
regulation of mitochondrion organization	Gene Ontology	GO:0010821	6	63	0.0302897	0.167918	NMUR1|IFNL3|PID1|SLCO1A2|NRG1|PHYHIP	http://amigo.geneontology.org/amigo/term/GO:0010821
negative regulation of protein phosphorylation	Gene Ontology	GO:0001933	6	63	0.0302897	0.167918	PPP1R1A|CCNB1|PTK6|PER1|GFRA2|GPRC5A	http://amigo.geneontology.org/amigo/term/GO:0001933
stem cell proliferation	Gene Ontology	GO:0072089	4	31	0.0305288	0.168822	HN1|SOX11|LEF1|CD34	http://amigo.geneontology.org/amigo/term/GO:0072089
negative regulation of mitotic cell cycle	Gene Ontology	GO:0045930	4	31	0.0305288	0.168822	HUS1B|ZWINT|BRINP3|CDK1	http://amigo.geneontology.org/amigo/term/GO:0045930
regulation of cellular response to growth factor stimulus	Gene Ontology	GO:0090287	5	47	0.0318097	0.175686	HN1|CAV2|CHRDL1|FGF1|FOXD1	http://amigo.geneontology.org/amigo/term/GO:0090287
intracellular receptor signaling pathway	Gene Ontology	GO:0030522	6	64	0.0322078	0.177443	CCNE1|PRAME|RXRG|PPARG|ALDH1A2|AKR1C3	http://amigo.geneontology.org/amigo/term/GO:0030522
anchoring junction	Gene Ontology	GO:0070161	7	82	0.0326053	0.17941	DDR2|FAT2|AKAP12|CDSN|CAV2|FGFR3|MISP	http://amigo.geneontology.org/amigo/term/GO:0070161
extrinsic component of cytoplasmic side of plasma membrane	Gene Ontology	GO:0031234	3	18	0.0333371	0.182531	BMX|SRMS|PTK6	http://amigo.geneontology.org/amigo/term/GO:0031234
cytoplasmic vesicle lumen	Gene Ontology	GO:0060205	3	18	0.0333371	0.182531	MMRN1|PCSK1|IGF1	http://amigo.geneontology.org/amigo/term/GO:0060205
steroid binding	Gene Ontology	GO:0005496	3	18	0.0333371	0.182531	PMP2|APOA1|APOA2	http://amigo.geneontology.org/amigo/term/GO:0005496
regulation of receptor signaling pathway via STAT	Gene Ontology	GO:1904892	3	18	0.0333371	0.182531	IL19|LRRC15|KIT	http://amigo.geneontology.org/amigo/term/GO:1904892
protein heterotetramerization	Gene Ontology	GO:0051290	4	32	0.0334459	0.182676	HIST1H3C|HIST1H4H|HIST1H4E|HIST1H4D	http://amigo.geneontology.org/amigo/term/GO:0051290
intermediate filament	Gene Ontology	GO:0005882	4	32	0.0334459	0.182676	KRT3|KRT2|KRTAP13-4|BFSP2	http://amigo.geneontology.org/amigo/term/GO:0005882
MAP kinase activity	Gene Ontology	GO:0004707	5	48	0.034171	0.186406	CARTPT|KISS1R|TNXB|GHR|KIT	http://amigo.geneontology.org/amigo/term/GO:0004707
axon	Gene Ontology	GO:0030424	7	83	0.0343543	0.187176	MGARP|GPRIN1|CNTNAP2|SNCB|AURKA|SCN1A|CTNNA2	http://amigo.geneontology.org/amigo/term/GO:0030424
organelle membrane	Gene Ontology	GO:0031090	26	493	0.0347857	0.187868	RASSF9|HS3ST5|OTC|SLC6A4|AGMO|JPH3|SVOP|SLC30A8|BRIP1|GAL3ST2|SPTSSB|RYR3|DGAT2|TF|DHRS7C|CYP21A2|GBP5|CYP2A6|GFY|SYNGR3|ACSL1|TMEM190|MAOA|NXNL1|SYN2|DDN	http://amigo.geneontology.org/amigo/term/GO:0031090
Wnt signaling pathway	Gene Ontology	GO:0016055	8	102	0.0348982	0.187868	HOXB9|DLX5|AMER2|EGR1|COL1A1|APCDD1|LEF1|NKX2-5	http://amigo.geneontology.org/amigo/term/GO:0016055
WW domain binding	Gene Ontology	GO:0050699	2	7	0.0357097	0.187868	TP63|TCEAL5	http://amigo.geneontology.org/amigo/term/GO:0050699
physiological cardiac muscle hypertrophy	Gene Ontology	GO:0003301	2	7	0.0357097	0.187868	AKAP6|CAV3	http://amigo.geneontology.org/amigo/term/GO:0003301
steroid hormone biosynthetic process	Gene Ontology	GO:0120178	2	7	0.0357097	0.187868	CACNA1H|HSD17B6	http://amigo.geneontology.org/amigo/term/GO:0120178
endodeoxyribonuclease activity	Gene Ontology	GO:0004520	2	7	0.0357097	0.187868	EXO1|RAD51	http://amigo.geneontology.org/amigo/term/GO:0004520
regulation of sodium ion transmembrane transport	Gene Ontology	GO:1902305	2	7	0.0357097	0.187868	SCN2B|ATP1A2	http://amigo.geneontology.org/amigo/term/GO:1902305
acid-thiol ligase activity	Gene Ontology	GO:0016878	2	7	0.0357097	0.187868	ACSL1|ACSM5	http://amigo.geneontology.org/amigo/term/GO:0016878
main axon	Gene Ontology	GO:0044304	2	7	0.0357097	0.187868	MYOC|KCNA2	http://amigo.geneontology.org/amigo/term/GO:0044304
retinal ganglion cell axon guidance	Gene Ontology	GO:0031290	2	7	0.0357097	0.187868	BMPR1B|SLIT3	http://amigo.geneontology.org/amigo/term/GO:0031290
negative regulation of chromosome segregation	Gene Ontology	GO:0051985	2	7	0.0357097	0.187868	CENPF|ESPL1	http://amigo.geneontology.org/amigo/term/GO:0051985
regulation of endoplasmic reticulum stress-induced intrinsic apoptotic signaling pathway	Gene Ontology	GO:1902235	2	7	0.0357097	0.187868	MAGEA3|CREB3L1	http://amigo.geneontology.org/amigo/term/GO:1902235
negative regulation of actin filament depolymerization	Gene Ontology	GO:0030835	2	7	0.0357097	0.187868	CAPZA3|GSN	http://amigo.geneontology.org/amigo/term/GO:0030835
cartilage condensation	Gene Ontology	GO:0001502	2	7	0.0357097	0.187868	BMPR1B|FGF4	http://amigo.geneontology.org/amigo/term/GO:0001502
circadian sleep/wake cycle	Gene Ontology	GO:0042745	2	7	0.0357097	0.187868	NPY2R|TH	http://amigo.geneontology.org/amigo/term/GO:0042745
positive regulation of blood vessel diameter	Gene Ontology	GO:0097755	2	7	0.0357097	0.187868	LEP|ADRB3	http://amigo.geneontology.org/amigo/term/GO:0097755
apoptotic process involved in development	Gene Ontology	GO:1902742	2	7	0.0357097	0.187868	LEF1|PAX2	http://amigo.geneontology.org/amigo/term/GO:1902742
aromatase activity	Gene Ontology	GO:0070330	2	7	0.0357097	0.187868	CYP1A1|CYP2F1	http://amigo.geneontology.org/amigo/term/GO:0070330
positive regulation of cardiac muscle cell proliferation	Gene Ontology	GO:0060045	2	7	0.0357097	0.187868	TBX20|CDK1	http://amigo.geneontology.org/amigo/term/GO:0060045
cellular response to lithium ion	Gene Ontology	GO:0071285	2	7	0.0357097	0.187868	CEBPA|MYOG	http://amigo.geneontology.org/amigo/term/GO:0071285
neuron maturation	Gene Ontology	GO:0042551	2	7	0.0357097	0.187868	KCNIP2|EPHA8	http://amigo.geneontology.org/amigo/term/GO:0042551
positive regulation of muscle hypertrophy	Gene Ontology	GO:0014742	2	7	0.0357097	0.187868	NR4A3|IGF1	http://amigo.geneontology.org/amigo/term/GO:0014742
neuroendocrine cell differentiation	Gene Ontology	GO:0061101	2	7	0.0357097	0.187868	ASCL1|FGF2	http://amigo.geneontology.org/amigo/term/GO:0061101
oxygen binding	Gene Ontology	GO:0019825	2	7	0.0357097	0.187868	CYP3A4|TH	http://amigo.geneontology.org/amigo/term/GO:0019825
brain morphogenesis	Gene Ontology	GO:0048854	2	7	0.0357097	0.187868	SFRP1|EMX1	http://amigo.geneontology.org/amigo/term/GO:0048854
positive regulation of ERBB signaling pathway	Gene Ontology	GO:1901186	2	7	0.0357097	0.187868	NEURL1|AGR2	http://amigo.geneontology.org/amigo/term/GO:1901186
regulation of intracellular steroid hormone receptor signaling pathway	Gene Ontology	GO:0033143	2	7	0.0357097	0.187868	SFRP1|FOXH1	http://amigo.geneontology.org/amigo/term/GO:0033143
p38MAPK cascade	Gene Ontology	GO:0038066	2	7	0.0357097	0.187868	LEP|PER1	http://amigo.geneontology.org/amigo/term/GO:0038066
cytokine production involved in inflammatory response	Gene Ontology	GO:0002534	2	7	0.0357097	0.187868	PER1|IL17B	http://amigo.geneontology.org/amigo/term/GO:0002534
voltage-gated ion channel activity	Gene Ontology	GO:0005244	4	33	0.0365198	0.191675	HTR3A|GRIN2D|KCNF1|KCNH2	http://amigo.geneontology.org/amigo/term/GO:0005244
protein stabilization	Gene Ontology	GO:0050821	3	19	0.0376469	0.194534	ANK2|TSPAN1|SOX17	http://amigo.geneontology.org/amigo/term/GO:0050821
glandular epithelial cell differentiation	Gene Ontology	GO:0002067	3	19	0.0376469	0.194534	PDX1|HOXA5|PROX1	http://amigo.geneontology.org/amigo/term/GO:0002067
megakaryocyte differentiation	Gene Ontology	GO:0030219	3	19	0.0376469	0.194534	HIST1H4K|HIST1H4H|HIST1H4D	http://amigo.geneontology.org/amigo/term/GO:0030219
synaptic vesicle	Gene Ontology	GO:0008021	3	19	0.0376469	0.194534	SYNGR3|SLC17A7|SVOP	http://amigo.geneontology.org/amigo/term/GO:0008021
monosaccharide transmembrane transport	Gene Ontology	GO:0015749	3	19	0.0376469	0.194534	GPC3|ADIPOQ|FGF21	http://amigo.geneontology.org/amigo/term/GO:0015749
regulation of smooth muscle contraction	Gene Ontology	GO:0006940	3	19	0.0376469	0.194534	EDN2|TACR3|OXTR	http://amigo.geneontology.org/amigo/term/GO:0006940
proximal/distal pattern formation	Gene Ontology	GO:0009954	3	19	0.0376469	0.194534	CYP26B1|HOXC10|DLX2	http://amigo.geneontology.org/amigo/term/GO:0009954
DNA-binding transcription activator activity, RNA polymerase II-specific	Gene Ontology	GO:0001228	3	19	0.0376469	0.194534	MYOCD|ATF3|NKX2-5	http://amigo.geneontology.org/amigo/term/GO:0001228
chloride transmembrane transporter activity	Gene Ontology	GO:0015108	3	19	0.0376469	0.194534	GABRA5|GABRG1|CLIC5	http://amigo.geneontology.org/amigo/term/GO:0015108
negative regulation of supramolecular fiber organization	Gene Ontology	GO:1902904	3	19	0.0376469	0.194534	MAST1|S1PR1|LMOD1	http://amigo.geneontology.org/amigo/term/GO:1902904
growth factor receptor binding	Gene Ontology	GO:0070851	3	19	0.0376469	0.194534	ADAM18|IL6|FGF4	http://amigo.geneontology.org/amigo/term/GO:0070851
purine ribonucleotide binding	Gene Ontology	GO:0032555	17	292	0.0376786	0.194534	ALPK3|MYH1|PNCK|RAB26|POLQ|ACACB|UBE2C|ACSL1|ACSM5|NTRK2|TUBA3E|PDK4|BRIP1|UBE2S|RERGL|PYGM|CDC6	http://amigo.geneontology.org/amigo/term/GO:0032555
carbohydrate homeostasis	Gene Ontology	GO:0033500	5	50	0.0392118	0.201745	PCK1|GCGR|NEUROD1|SSTR5|ACSM2A	http://amigo.geneontology.org/amigo/term/GO:0033500
positive regulation of biological process	Gene Ontology	GO:0048518	85	1968	0.0397195	0.20412	SLC18A1|HIST1H4A|CEMIP|DMD|HIST1H4E|EPHA8|PLK1|HOXC10|CAV3|IL12B|LTB|PGLYRP2|PKDCC|SEMA3G|MYOCD|RBMS3|SEMA3D|TXNIP|NKX2-3|EDNRB|PDE2A|S100A14|MEOX1|PHYHIP|GSN|CACNA1H|TP63|ZBTB16|CLEC3B|CD80|EGR1|CREB5|SIX3|POSTN|CCL14|PPBP|S100A9|ADIPOQ|ZSWIM2|LRRTM2|ESPL1|EDN3|S100B|C6|DLX2|CLRN1|SLITRK6|FOXJ1|IGF1|REG1A|FOS|NR4A3|MUC1|COL1A1|SLC24A2|NCCRP1|PYDC1|MAST1|PAX7|RBP4|DDN|HIST1H3J|CXCL10|HBA2|BRINP3|…	http://amigo.geneontology.org/amigo/term/GO:0048518
cellular nitrogen compound biosynthetic process	Gene Ontology	GO:0044271	70	1586	0.0403787	0.207268	ELANE|HMX2|TRIM15|DTX1|VAX1|SSX1|HMGB3|HIST1H4I|MAEL|RCOR2|BMPR1B|ISX|MYOCD|SCRT2|EMX1|BBOX1|CSRNP3|NKX2-5|SIM2|LHX3|MYH6|ZBTB16|CRABP2|INHBA|TWIST2|SOX17|HYPM|NEURL1|OTP|EXO1|NRG1|SPOCD1|SP8|NPR1|IGF1|LHX1|DYDC2|PAX7|TONSL|LIN28B|PTGIS|FOXD1|LDB2|SALL4|PER1|HIST1H3F|MCIDAS|DMRTC2|ACO1|HIST1H3H|TRIP13|FGF1|DBX2|CA9|BMP2|POU4F1|TMPRSS6|ZNF716|HOXD12|URAD|AK5|TLX3|HOXA5|DEPDC1|SPP1|HIST1H4K|PID1|EB…	http://amigo.geneontology.org/amigo/term/GO:0044271
positive regulation of hormone secretion	Gene Ontology	GO:0046887	6	68	0.0406608	0.208475	KISS1R|TFR2|KISS1|GALR1|GAL|RBP4	http://amigo.geneontology.org/amigo/term/GO:0046887
cellular response to endogenous stimulus	Gene Ontology	GO:0071495	22	409	0.0413497	0.211762	AOC1|GHR|TNMD|GPLD1|GPD1|GNG13|CAV1|LHCGR|CLEC3B|GNG11|PDE3B|GDF15|TGFBR3|IGF1|FOXD1|GPC3|LEF1|FGF1|SLC2A4|DKK1|SSTR2|GNG3	http://amigo.geneontology.org/amigo/term/GO:0071495
cell leading edge	Gene Ontology	GO:0031252	5	51	0.0418928	0.214049	NRG1|GABRG2|CDH2|UNC5A|WASF3	http://amigo.geneontology.org/amigo/term/GO:0031252
negative regulation of transcription by RNA polymerase II	Gene Ontology	GO:0000122	13	209	0.0422178	0.214516	ELANE|ESR2|VAX1|FOSB|ASCL1|CEBPA|KLF4|FOXM1|ATF3|HIST1H1D|OLIG2|HES6|TBX15	http://amigo.geneontology.org/amigo/term/GO:0000122
negative regulation of muscle cell differentiation	Gene Ontology	GO:0051148	3	20	0.0422261	0.214516	CXCL10|CEACAM5|DKK1	http://amigo.geneontology.org/amigo/term/GO:0051148
regulation of response to wounding	Gene Ontology	GO:1903034	3	20	0.0422261	0.214516	ADRB2|FGG|TMPRSS6	http://amigo.geneontology.org/amigo/term/GO:1903034
regulation of protein dephosphorylation	Gene Ontology	GO:0035304	3	20	0.0422261	0.214516	CDCA2|PTN|ELFN2	http://amigo.geneontology.org/amigo/term/GO:0035304
cell fate determination	Gene Ontology	GO:0001709	3	20	0.0422261	0.214516	NKX2-2|NTF4|SOX17	http://amigo.geneontology.org/amigo/term/GO:0001709
regulation of embryonic development	Gene Ontology	GO:0045995	4	35	0.0431394	0.215305	HN1|DMRT2|IGF1|ADIPOQ	http://amigo.geneontology.org/amigo/term/GO:0045995
tissue regeneration	Gene Ontology	GO:0042246	4	35	0.0431394	0.215305	ANXA1|POSTN|IGFBP1|TGFBR2	http://amigo.geneontology.org/amigo/term/GO:0042246
protein C-terminus binding	Gene Ontology	GO:0008022	4	35	0.0431394	0.215305	MKI67|DST|CAV3|TOP2A	http://amigo.geneontology.org/amigo/term/GO:0008022
delayed rectifier potassium channel activity	Gene Ontology	GO:0005251	2	8	0.0436436	0.215305	KCNG3|KCNH1	http://amigo.geneontology.org/amigo/term/GO:0005251
muscle cell apoptotic process	Gene Ontology	GO:0010657	2	8	0.0436436	0.215305	NRG1|IGF1	http://amigo.geneontology.org/amigo/term/GO:0010657
regulation of protein maturation	Gene Ontology	GO:1903317	2	8	0.0436436	0.215305	F12|TFR2	http://amigo.geneontology.org/amigo/term/GO:1903317
cellular response to dsRNA	Gene Ontology	GO:0071359	2	8	0.0436436	0.215305	IFNB1|CAV1	http://amigo.geneontology.org/amigo/term/GO:0071359
olfactory bulb interneuron differentiation	Gene Ontology	GO:0021889	2	8	0.0436436	0.215305	ROBO2|SALL3	http://amigo.geneontology.org/amigo/term/GO:0021889
oxidoreductase activity, acting on the aldehyde or oxo group of donors	Gene Ontology	GO:0016903	2	8	0.0436436	0.215305	ALDH1L1|ADH4	http://amigo.geneontology.org/amigo/term/GO:0016903
kinesin binding	Gene Ontology	GO:0019894	2	8	0.0436436	0.215305	MAPK8IP2|KIF18B	http://amigo.geneontology.org/amigo/term/GO:0019894
antibiotic catabolic process	Gene Ontology	GO:0017001	2	8	0.0436436	0.215305	GPX3|HBB	http://amigo.geneontology.org/amigo/term/GO:0017001
amyloid-beta binding	Gene Ontology	GO:0001540	2	8	0.0436436	0.215305	ITM2A|APOA1	http://amigo.geneontology.org/amigo/term/GO:0001540
establishment or maintenance of apical/basal cell polarity	Gene Ontology	GO:0035088	2	8	0.0436436	0.215305	FOXJ1|CRB2	http://amigo.geneontology.org/amigo/term/GO:0035088
regulation of protein insertion into mitochondrial membrane involved in apoptotic signaling pathway	Gene Ontology	GO:1900739	2	8	0.0436436	0.215305	TP63|E2F1	http://amigo.geneontology.org/amigo/term/GO:1900739
O-acyltransferase activity	Gene Ontology	GO:0008374	2	8	0.0436436	0.215305	APOA1|APOA2	http://amigo.geneontology.org/amigo/term/GO:0008374
columnar/cuboidal epithelial cell development	Gene Ontology	GO:0002066	2	8	0.0436436	0.215305	NKX3-2|NKX6-1	http://amigo.geneontology.org/amigo/term/GO:0002066
positive regulation of intrinsic apoptotic signaling pathway	Gene Ontology	GO:2001244	2	8	0.0436436	0.215305	IL19|CAV1	http://amigo.geneontology.org/amigo/term/GO:2001244
pyridoxal phosphate binding	Gene Ontology	GO:0030170	2	8	0.0436436	0.215305	PYGM|SDS	http://amigo.geneontology.org/amigo/term/GO:0030170
neuropeptide receptor activity	Gene Ontology	GO:0008188	2	8	0.0436436	0.215305	GPR139|SSTR5	http://amigo.geneontology.org/amigo/term/GO:0008188
regulation of cardiac muscle cell proliferation	Gene Ontology	GO:0060043	2	8	0.0436436	0.215305	CCNB1|FGF2	http://amigo.geneontology.org/amigo/term/GO:0060043
heparan sulfate proteoglycan metabolic process	Gene Ontology	GO:0030201	2	8	0.0436436	0.215305	HS3ST4|NDST4	http://amigo.geneontology.org/amigo/term/GO:0030201
regulation of cytokine production involved in inflammatory response	Gene Ontology	GO:1900015	2	8	0.0436436	0.215305	LEP|PER1	http://amigo.geneontology.org/amigo/term/GO:1900015
neuromuscular junction	Gene Ontology	GO:0031594	2	8	0.0436436	0.215305	POSTN|CAV3	http://amigo.geneontology.org/amigo/term/GO:0031594
organic hydroxy compound transmembrane transporter activity	Gene Ontology	GO:1901618	2	8	0.0436436	0.215305	SLC16A7|SLCO1C1	http://amigo.geneontology.org/amigo/term/GO:1901618
ion transmembrane transporter activity, phosphorylative mechanism	Gene Ontology	GO:0015662	2	8	0.0436436	0.215305	ATP1A3|ATP1A2	http://amigo.geneontology.org/amigo/term/GO:0015662
organic substance biosynthetic process	Gene Ontology	GO:1901576	82	1904	0.0449557	0.221532	HIST1H4A|ISX|POLQ|BBOX1|HMGB3|HIST1H4J|HIST1H4I|HIST1H4H|IL12B|E2F7|HIST1H4L|IL21|TXNIP|BMPR1B|PF4|E2F8|MYBL1|PYCR1|MYBL2|GAD1|ALDH1A2|HIST1H2AB|SPX|LHCGR|GAL3ST2|FEZF2|EGR2|DAZL|TWIST2|CDT1|PIF1|PDE3B|NEURL1|CPNE7|ZIC3|AURKB|NKX3-2|CCL21|CCL20|CIDEA|ANGPT1|BIRC5|HMX3|ATOH8|NR3C2|HOXB9|TICRR|IFNL1|DMP1|SLC24A5|RAMP1|PTGIS|ENTPD8|CHST9|DLX4|PER1|EMX1|HIST1H3F|DDN|MAS1|MUC5AC|ACTL6B|FGF5|HHATL|HIST…	http://amigo.geneontology.org/amigo/term/GO:1901576
cytosol	Gene Ontology	GO:0005829	27	531	0.0457028	0.224963	DMD|PTK6|PKMYT1|SPTBN1|GYG2|TNNT3|SDPR|RXFP3|CDT1|RGS6|RAX|PPP1R14A|TGFBR2|KISS1|FGD3|DST|CPLX2|GYS2|ACO1|DEPDC1B|MUC13|PAFAH1B3|CFD|SLC2A4|GSTM5|KIF23|ALDH1L1	http://amigo.geneontology.org/amigo/term/GO:0005829
enzyme activator activity	Gene Ontology	GO:0008047	7	89	0.0461543	0.226934	NPR3|CLPSL1|MT3|PPP1R12B|NRG1|ANGPT4|IQGAP3	http://amigo.geneontology.org/amigo/term/GO:0008047
negative regulation of cell growth	Gene Ontology	GO:0030308	4	36	0.0466853	0.229037	NPR1|CDKN2A|INHBA|MT3	http://amigo.geneontology.org/amigo/term/GO:0030308
receptor signaling pathway via STAT	Gene Ontology	GO:0097696	3	21	0.0470705	0.22991	HN1|GHR|KIT	http://amigo.geneontology.org/amigo/term/GO:0097696
inorganic anion transmembrane transporter activity	Gene Ontology	GO:0015103	3	21	0.0470705	0.22991	GABRE|SLC4A1|GLRA4	http://amigo.geneontology.org/amigo/term/GO:0015103
cytokine receptor activity	Gene Ontology	GO:0004896	3	21	0.0470705	0.22991	CNTFR|CXCR5|GFRA2	http://amigo.geneontology.org/amigo/term/GO:0004896
metalloendopeptidase activity	Gene Ontology	GO:0004222	3	21	0.0470705	0.22991	ADAMTS20|MMP10|ADAM8	http://amigo.geneontology.org/amigo/term/GO:0004222
regulation of transmembrane receptor protein serine/threonine kinase signaling pathway	Gene Ontology	GO:0090092	5	53	0.047579	0.231882	ONECUT2|FBN2|BMP2|CAV2|SOX11	http://amigo.geneontology.org/amigo/term/GO:0090092
regulation of neuron death	Gene Ontology	GO:1901214	5	53	0.047579	0.231882	KIF14|NR4A3|VSTM2L|ADAM8|GFRAL	http://amigo.geneontology.org/amigo/term/GO:1901214
regulation of plasma membrane bounded cell projection organization	Gene Ontology	GO:0120035	7	90	0.0483437	0.235351	PTN|SEMA3D|SEMA3G|ITPKA|VIL1|GFAP|NKX6-1	http://amigo.geneontology.org/amigo/term/GO:0120035
neuron apoptotic process	Gene Ontology	GO:0051402	8	110	0.0493924	0.240192	ESR2|NR4A3|ADAM8|SCN2A|SNCB|GABRA5|KCNB1|PAK3	http://amigo.geneontology.org/amigo/term/GO:0051402
microtubule	Gene Ontology	GO:0005874	6	72	0.0503956	0.244267	NEK2|PLK1|KIF18A|AURKA|TUBA3E|PRC1	http://amigo.geneontology.org/amigo/term/GO:0005874
regulation of canonical Wnt signaling pathway	Gene Ontology	GO:0060828	5	54	0.0505848	0.244606	CDH2|DKK1|EGR1|C6|CTHRC1	http://amigo.geneontology.org/amigo/term/GO:0060828
negative regulation of RNA biosynthetic process	Gene Ontology	GO:1902679	22	419	0.0507047	0.244606	FOXP3|HIST1H4A|VAX1|DMRT1|PLK1|HIST1H2AH|TXNIP|CBX2|NKX2-5|DYDC2|SIX3|DLX2|CENPF|ASCL1|FOXD1|HIST1H3F|SFRP1|ESR2|BMP2|DKK1|HN1|RIPPLY3	http://amigo.geneontology.org/amigo/term/GO:1902679
process utilizing autophagic mechanism	Gene Ontology	GO:0061919	8	111	0.0514412	0.244606	MYH11|EEF1A2|CCDC36|LEPR|HIST1H3D|SCN1A|HIST1H3J|MAP1LC3C	http://amigo.geneontology.org/amigo/term/GO:0061919
oxidoreductase activity, acting on single donors with incorporation of molecular oxygen	Gene Ontology	GO:0016701	2	9	0.0521586	0.244606	RPE65|CDO1	http://amigo.geneontology.org/amigo/term/GO:0016701
cleavage furrow	Gene Ontology	GO:0032154	2	9	0.0521586	0.244606	CEP55|MYLK	http://amigo.geneontology.org/amigo/term/GO:0032154
extracellular matrix structural constituent	Gene Ontology	GO:0005201	2	9	0.0521586	0.244606	PRELP|COL2A1	http://amigo.geneontology.org/amigo/term/GO:0005201
sterol binding	Gene Ontology	GO:0032934	2	9	0.0521586	0.244606	APOA1|CAV1	http://amigo.geneontology.org/amigo/term/GO:0032934
regulation of circadian sleep/wake cycle	Gene Ontology	GO:0042749	2	9	0.0521586	0.244606	NPY2R|KCNA2	http://amigo.geneontology.org/amigo/term/GO:0042749
forebrain regionalization	Gene Ontology	GO:0021871	2	9	0.0521586	0.244606	LHX1|FEZF2	http://amigo.geneontology.org/amigo/term/GO:0021871
ceramide biosynthetic process	Gene Ontology	GO:0046513	2	9	0.0521586	0.244606	FAM57B|DEGS2	http://amigo.geneontology.org/amigo/term/GO:0046513
regulation of peptidyl-lysine acetylation	Gene Ontology	GO:2000756	2	9	0.0521586	0.244606	FOXP3|KLF15	http://amigo.geneontology.org/amigo/term/GO:2000756
collagen binding	Gene Ontology	GO:0005518	2	9	0.0521586	0.244606	VWF|MMP13	http://amigo.geneontology.org/amigo/term/GO:0005518
retinol metabolic process	Gene Ontology	GO:0042572	2	9	0.0521586	0.244606	ADH4|AKR1C3	http://amigo.geneontology.org/amigo/term/GO:0042572
G protein-coupled amine receptor activity	Gene Ontology	GO:0008227	2	9	0.0521586	0.244606	ADRA1A|HTR1D	http://amigo.geneontology.org/amigo/term/GO:0008227
microbody membrane	Gene Ontology	GO:0031903	2	9	0.0521586	0.244606	CAV1|CAT	http://amigo.geneontology.org/amigo/term/GO:0031903
negative regulation of blood vessel diameter	Gene Ontology	GO:0097756	2	9	0.0521586	0.244606	ADRA1A|HTR2A	http://amigo.geneontology.org/amigo/term/GO:0097756
adiponectin-activated signaling pathway	Gene Ontology	GO:0033211	2	9	0.0521586	0.244606	ACSL1|ADIPOQ	http://amigo.geneontology.org/amigo/term/GO:0033211
regulation of striated muscle cell apoptotic process	Gene Ontology	GO:0010662	2	9	0.0521586	0.244606	MYOCD|NKX2-5	http://amigo.geneontology.org/amigo/term/GO:0010662
circadian behavior	Gene Ontology	GO:0048512	2	9	0.0521586	0.244606	UTS2|NLGN1	http://amigo.geneontology.org/amigo/term/GO:0048512
ion gated channel activity	Gene Ontology	GO:0022839	2	9	0.0521586	0.244606	KCNMB1|CLCA4	http://amigo.geneontology.org/amigo/term/GO:0022839
oxidoreductase activity, acting on peroxide as acceptor	Gene Ontology	GO:0016684	2	9	0.0521586	0.244606	EPO|HBB	http://amigo.geneontology.org/amigo/term/GO:0016684
microvillus membrane	Gene Ontology	GO:0031528	2	9	0.0521586	0.244606	DPEP1|S100P	http://amigo.geneontology.org/amigo/term/GO:0031528
positive regulation of wound healing	Gene Ontology	GO:0090303	2	9	0.0521586	0.244606	ANXA1|F2	http://amigo.geneontology.org/amigo/term/GO:0090303
regulation of glucose transmembrane transport	Gene Ontology	GO:0010827	3	22	0.0521752	0.244606	OSTN|SORBS1|ADIPOQ	http://amigo.geneontology.org/amigo/term/GO:0010827
vasoconstriction	Gene Ontology	GO:0042310	3	22	0.0521752	0.244606	LEP|TACR1|OXTR	http://amigo.geneontology.org/amigo/term/GO:0042310
tetrapyrrole binding	Gene Ontology	GO:0046906	3	22	0.0521752	0.244606	CYP1A1|HBA2|CYP2F1	http://amigo.geneontology.org/amigo/term/GO:0046906
female meiotic nuclear division	Gene Ontology	GO:0007143	3	22	0.0521752	0.244606	PLK1|MEIKIN|TRIP13	http://amigo.geneontology.org/amigo/term/GO:0007143
xenophagy	Gene Ontology	GO:0098792	3	22	0.0521752	0.244606	HIST1H3B|HIST1H3I|HIST1H3D	http://amigo.geneontology.org/amigo/term/GO:0098792
symporter activity	Gene Ontology	GO:0015293	3	22	0.0521752	0.244606	SLC5A8|SLC15A1|SLC1A1	http://amigo.geneontology.org/amigo/term/GO:0015293
hydrolase activity, acting on ester bonds	Gene Ontology	GO:0016788	9	132	0.053017	0.24829	RNASE7|SLC7A14|MGLL|DSC1|APOC3|PPP1R12B|PLA2G4D|SPOCD1|PPP1R14A	http://amigo.geneontology.org/amigo/term/GO:0016788
sensory organ morphogenesis	Gene Ontology	GO:0090596	4	38	0.054247	0.252716	OLFM3|RPE65|FGF2|CRB2	http://amigo.geneontology.org/amigo/term/GO:0090596
cellular response to extracellular stimulus	Gene Ontology	GO:0031668	4	38	0.054247	0.252716	PPARG|SFRP1|PDK4|BRIP1	http://amigo.geneontology.org/amigo/term/GO:0031668
phosphatidylinositol metabolic process	Gene Ontology	GO:0046488	4	38	0.054247	0.252716	GPLD1|PIK3C2G|FGF2|EPHA8	http://amigo.geneontology.org/amigo/term/GO:0046488
regulation of glucose metabolic process	Gene Ontology	GO:0010906	4	38	0.054247	0.252716	DGAT2|DUSP1|PDK4|ACACB	http://amigo.geneontology.org/amigo/term/GO:0010906
phospholipid metabolic process	Gene Ontology	GO:0006644	7	93	0.0553027	0.257094	PNLIPRP2|CCL21|PLA2G2F|NRG1|FGF5|APOA2|PLA2G4D	http://amigo.geneontology.org/amigo/term/GO:0006644
cellular response to peptide	Gene Ontology	GO:1901653	5	56	0.0569227	0.264071	GCGR|GNG3|PRKAR2B|GNG11|ACTN2	http://amigo.geneontology.org/amigo/term/GO:1901653
regulation of defense response to virus by host	Gene Ontology	GO:0050691	3	23	0.0575347	0.265522	HIST1H3C|MYOM1|SCN1A	http://amigo.geneontology.org/amigo/term/GO:0050691
regulation of fat cell differentiation	Gene Ontology	GO:0045598	3	23	0.0575347	0.265522	FAM57B|MMP11|ADIPOQ	http://amigo.geneontology.org/amigo/term/GO:0045598
ammonium ion metabolic process	Gene Ontology	GO:0097164	3	23	0.0575347	0.265522	PLA2G2F|AKR1C3|PLA2G4D	http://amigo.geneontology.org/amigo/term/GO:0097164
cluster of actin-based cell projections	Gene Ontology	GO:0098862	3	23	0.0575347	0.265522	KNCN|SLC6A19|TMC2	http://amigo.geneontology.org/amigo/term/GO:0098862
calcium ion transmembrane import into cytosol	Gene Ontology	GO:0097553	3	23	0.0575347	0.265522	CCL21|CXCL10|F2	http://amigo.geneontology.org/amigo/term/GO:0097553
transferase activity, transferring hexosyl groups	Gene Ontology	GO:0016758	4	39	0.0582611	0.26776	FUT7|GYS2|ADIPOQ|GYG2	http://amigo.geneontology.org/amigo/term/GO:0016758
extrinsic component of membrane	Gene Ontology	GO:0019898	4	39	0.0582611	0.26776	CNTFR|TGM3|RGS8|GNG13	http://amigo.geneontology.org/amigo/term/GO:0019898
oxidoreductase activity, acting on paired donors, with incorporation or reduction of molecular oxygen	Gene Ontology	GO:0016705	4	39	0.0582611	0.26776	CYP1A1|CAV3|PTGIS|CYP21A2	http://amigo.geneontology.org/amigo/term/GO:0016705
aging	Gene Ontology	GO:0007568	6	75	0.0585563	0.268282	IGF1|FOXG1|CRYAB|IL6|HTR2A|TACR3	http://amigo.geneontology.org/amigo/term/GO:0007568
female pregnancy	Gene Ontology	GO:0007565	5	57	0.0602547	0.27419	FOSB|IGF1|CLIC5|HMX3|CRHBP	http://amigo.geneontology.org/amigo/term/GO:0007565
regulation of transcription by RNA polymerase II	Gene Ontology	GO:0006357	34	718	0.0609734	0.27419	TBR1|SOX2|MYBL1|MNX1|CBX2|SPX|GBX2|MT3|S1PR1|EN1|TBX15|TERT|DLX2|GDF10|BMP8A|TXNIP|RXRG|SPIB|PAX7|PAX1|DDN|EBF1|HIST1H1D|PROX1|E2F7|SFRP1|E2F1|ZNF280A|PDE2A|GALR1|CREB3L1|NKX3-2|ABRA|ATF3	http://amigo.geneontology.org/amigo/term/GO:0006357
sarcoplasmic reticulum membrane	Gene Ontology	GO:0033017	2	10	0.0612059	0.27419	AKAP6|CASQ2	http://amigo.geneontology.org/amigo/term/GO:0033017
cerebellar Purkinje cell layer development	Gene Ontology	GO:0021680	2	10	0.0612059	0.27419	SEZ6|KLHL1	http://amigo.geneontology.org/amigo/term/GO:0021680
sympathetic nervous system development	Gene Ontology	GO:0048485	2	10	0.0612059	0.27419	ASCL1|PLXNA4	http://amigo.geneontology.org/amigo/term/GO:0048485
high-density lipoprotein particle	Gene Ontology	GO:0034364	2	10	0.0612059	0.27419	GPIHBP1|APOC3	http://amigo.geneontology.org/amigo/term/GO:0034364
ATPase-coupled transmembrane transporter activity	Gene Ontology	GO:0042626	2	10	0.0612059	0.27419	ABCD2|ABCC9	http://amigo.geneontology.org/amigo/term/GO:0042626
protein phosphatase regulator activity	Gene Ontology	GO:0019888	2	10	0.0612059	0.27419	PPP1R1A|ELFN2	http://amigo.geneontology.org/amigo/term/GO:0019888
cellular metabolic compound salvage	Gene Ontology	GO:0043094	2	10	0.0612059	0.27419	AMPD1|BHMT2	http://amigo.geneontology.org/amigo/term/GO:0043094
ERAD pathway	Gene Ontology	GO:0036503	2	10	0.0612059	0.27419	BRSK2|CAV1	http://amigo.geneontology.org/amigo/term/GO:0036503
positive regulation of leukocyte apoptotic process	Gene Ontology	GO:2000108	2	10	0.0612059	0.27419	ANXA1|NR4A3	http://amigo.geneontology.org/amigo/term/GO:2000108
positive regulation of striated muscle contraction	Gene Ontology	GO:0045989	2	10	0.0612059	0.27419	CGA|CHGA	http://amigo.geneontology.org/amigo/term/GO:0045989
hypothalamus development	Gene Ontology	GO:0021854	2	10	0.0612059	0.27419	OTP|SOX3	http://amigo.geneontology.org/amigo/term/GO:0021854
multivesicular body	Gene Ontology	GO:0005771	2	10	0.0612059	0.27419	HMP19|SLC2A4	http://amigo.geneontology.org/amigo/term/GO:0005771
regulation of chondrocyte differentiation	Gene Ontology	GO:0032330	2	10	0.0612059	0.27419	NKX3-2|SIX2	http://amigo.geneontology.org/amigo/term/GO:0032330
alcohol binding	Gene Ontology	GO:0043178	2	10	0.0612059	0.27419	APOC3|APOA2	http://amigo.geneontology.org/amigo/term/GO:0043178
regulation of blood vessel diameter	Gene Ontology	GO:0097746	2	10	0.0612059	0.27419	TACR1|OXTR	http://amigo.geneontology.org/amigo/term/GO:0097746
negative regulation of cation transmembrane transport	Gene Ontology	GO:1904063	2	10	0.0612059	0.27419	MMP9|CAV1	http://amigo.geneontology.org/amigo/term/GO:1904063
negative regulation of receptor signaling pathway via JAK-STAT	Gene Ontology	GO:0046426	2	10	0.0612059	0.27419	NEUROD1|BGN	http://amigo.geneontology.org/amigo/term/GO:0046426
regulation of sodium ion transmembrane transporter activity	Gene Ontology	GO:2000649	2	10	0.0612059	0.27419	DMD|SCN3B	http://amigo.geneontology.org/amigo/term/GO:2000649
regulation of cell-matrix adhesion	Gene Ontology	GO:0001952	4	40	0.0624293	0.279107	ONECUT2|SFRP1|CDKN2A|POSTN	http://amigo.geneontology.org/amigo/term/GO:0001952
regulation of small molecule metabolic process	Gene Ontology	GO:0062012	4	40	0.0624293	0.279107	PTH1R|GCGR|MYOG|FGF1	http://amigo.geneontology.org/amigo/term/GO:0062012
vesicle-mediated transport in synapse	Gene Ontology	GO:0099003	3	24	0.063143	0.2806	CADPS|CAPS|SYN1	http://amigo.geneontology.org/amigo/term/GO:0099003
cellular response to interleukin-1	Gene Ontology	GO:0071347	3	24	0.063143	0.2806	CCL21|EGR1|CCL7	http://amigo.geneontology.org/amigo/term/GO:0071347
negative regulation of cell-substrate adhesion	Gene Ontology	GO:0010812	3	24	0.063143	0.2806	MYOC|CDKN2A|MUC21	http://amigo.geneontology.org/amigo/term/GO:0010812
response to monoamine	Gene Ontology	GO:0071867	3	24	0.063143	0.2806	GNAL|CALY|PENK	http://amigo.geneontology.org/amigo/term/GO:0071867
negative regulation of cellular catabolic process	Gene Ontology	GO:0031330	3	24	0.063143	0.2806	LEP|MT3|LEPR	http://amigo.geneontology.org/amigo/term/GO:0031330
positive regulation of organelle organization	Gene Ontology	GO:0010638	9	137	0.0632562	0.280822	ANKRD53|IGF1|NUSAP1|DMRT1|MUC1|PYDC1|ADRB2|CFL2|CDCA5	http://amigo.geneontology.org/amigo/term/GO:0010638
positive regulation of cell projection organization	Gene Ontology	GO:0031346	5	58	0.0636952	0.282206	VIL1|ENPP2|MIEN1|RET|UNC13A	http://amigo.geneontology.org/amigo/term/GO:0031346
focal adhesion	Gene Ontology	GO:0005925	5	58	0.0636952	0.282206	MAST1|CDH2|FHL1|MCAM|MISP	http://amigo.geneontology.org/amigo/term/GO:0005925
regulation of carbohydrate metabolic process	Gene Ontology	GO:0006109	7	97	0.0655036	0.289639	SERPINA12|IGF1|PFKFB1|LEPR|IL6|GCGR|DUSP1	http://amigo.geneontology.org/amigo/term/GO:0006109
secondary active transmembrane transporter activity	Gene Ontology	GO:0015291	4	41	0.0667501	0.293687	SLC16A3|SLC6A4|SLC36A2|SLCO1C1	http://amigo.geneontology.org/amigo/term/GO:0015291
placenta development	Gene Ontology	GO:0001890	4	41	0.0667501	0.293687	E2F7|RSPO3|GJB2|E2F8	http://amigo.geneontology.org/amigo/term/GO:0001890
neural retina development	Gene Ontology	GO:0003407	4	41	0.0667501	0.293687	RPE65|SLC17A7|TRPM1|LHX1	http://amigo.geneontology.org/amigo/term/GO:0003407
regulation of reactive oxygen species metabolic process	Gene Ontology	GO:2000377	4	41	0.0667501	0.293687	PID1|MT3|CRYAB|MMP3	http://amigo.geneontology.org/amigo/term/GO:2000377
regulation of cell-substrate adhesion	Gene Ontology	GO:0010810	5	59	0.0672438	0.294982	MAST1|MUC21|FGG|VIT|ABI3BP	http://amigo.geneontology.org/amigo/term/GO:0010810
centrosome	Gene Ontology	GO:0005813	5	59	0.0672438	0.294982	NCAPG|WDR62|NDRG2|ESPL1|AURKA	http://amigo.geneontology.org/amigo/term/GO:0005813
ATPase activity	Gene Ontology	GO:0016887	5	59	0.0672438	0.294982	RAD54L|RECQL4|TNNT3|KIF1A|ATP1A2	http://amigo.geneontology.org/amigo/term/GO:0016887
primary alcohol metabolic process	Gene Ontology	GO:0034308	6	78	0.0674604	0.295639	DGAT2|ADH1C|ADH1B|AKR1C1|AKR1C2|AKR1C3	http://amigo.geneontology.org/amigo/term/GO:0034308
gene silencing by RNA	Gene Ontology	GO:0031047	7	98	0.0682196	0.298671	HIST1H4K|ASZ1|MAEL|LIN28A|LIN28B|HIST1H3C|HIST2H4A	http://amigo.geneontology.org/amigo/term/GO:0031047
positive regulation of autophagy of mitochondrion in response to mitochondrial depolarization	Gene Ontology	GO:1904925	3	25	0.0689934	0.299986	MYH11|ADRB2|PHYHIP	http://amigo.geneontology.org/amigo/term/GO:1904925
SNARE binding	Gene Ontology	GO:0000149	3	25	0.0689934	0.299986	CPLX2|SYT9|SYT5	http://amigo.geneontology.org/amigo/term/GO:0000149
extrinsic component of plasma membrane	Gene Ontology	GO:0019897	3	25	0.0689934	0.299986	SRMS|GNGT1|MYZAP	http://amigo.geneontology.org/amigo/term/GO:0019897
regulation of protein oligomerization	Gene Ontology	GO:0032459	3	25	0.0689934	0.299986	CLGN|MMP3|MMP1	http://amigo.geneontology.org/amigo/term/GO:0032459
digestive tract morphogenesis	Gene Ontology	GO:0048546	3	25	0.0689934	0.299986	HN1|TP63|SIX2	http://amigo.geneontology.org/amigo/term/GO:0048546
negative regulation of developmental growth	Gene Ontology	GO:0048640	3	25	0.0689934	0.299986	ADRB3|CAV3|FGFR3	http://amigo.geneontology.org/amigo/term/GO:0048640
hexose transmembrane transport	Gene Ontology	GO:0008645	3	25	0.0689934	0.299986	SLC2A4|ADIPOQ|GPC3	http://amigo.geneontology.org/amigo/term/GO:0008645
import into cell	Gene Ontology	GO:0098657	6	79	0.0705936	0.302534	KCNJ10|OLR1|DRP2|HBA1|CAV2|SLC1A1	http://amigo.geneontology.org/amigo/term/GO:0098657
amino acid transmembrane transporter activity	Gene Ontology	GO:0015171	2	11	0.0707391	0.302534	SLC17A7|SLC7A13	http://amigo.geneontology.org/amigo/term/GO:0015171
negative regulation of peptide hormone secretion	Gene Ontology	GO:0090278	2	11	0.0707391	0.302534	CARTPT|ACVR1C	http://amigo.geneontology.org/amigo/term/GO:0090278
cellular response to UV	Gene Ontology	GO:0034644	2	11	0.0707391	0.302534	PTN|TP63	http://amigo.geneontology.org/amigo/term/GO:0034644
mesonephric tubule morphogenesis	Gene Ontology	GO:0072171	2	11	0.0707391	0.302534	LHX1|FGF2	http://amigo.geneontology.org/amigo/term/GO:0072171
microvillus	Gene Ontology	GO:0005902	2	11	0.0707391	0.302534	VIL1|CA9	http://amigo.geneontology.org/amigo/term/GO:0005902
neural crest cell development	Gene Ontology	GO:0014032	2	11	0.0707391	0.302534	EDNRB|ALDH1A2	http://amigo.geneontology.org/amigo/term/GO:0014032
cell-cell contact zone	Gene Ontology	GO:0044291	2	11	0.0707391	0.302534	PCDH9|MYH1	http://amigo.geneontology.org/amigo/term/GO:0044291
regulation of fatty acid oxidation	Gene Ontology	GO:0046320	2	11	0.0707391	0.302534	DGAT2|ACACB	http://amigo.geneontology.org/amigo/term/GO:0046320
centriole	Gene Ontology	GO:0005814	2	11	0.0707391	0.302534	STARD9|CEP55	http://amigo.geneontology.org/amigo/term/GO:0005814
fatty acid derivative transport	Gene Ontology	GO:1901571	2	11	0.0707391	0.302534	KISS1R|NTSR1	http://amigo.geneontology.org/amigo/term/GO:1901571
DNA catabolic process	Gene Ontology	GO:0006308	2	11	0.0707391	0.302534	DNASE1L2|DNASE1L3	http://amigo.geneontology.org/amigo/term/GO:0006308
Rac GTPase binding	Gene Ontology	GO:0048365	2	11	0.0707391	0.302534	ITPKA|PREX2	http://amigo.geneontology.org/amigo/term/GO:0048365
calcium channel complex	Gene Ontology	GO:0034704	2	11	0.0707391	0.302534	CACNA1H|TRDN	http://amigo.geneontology.org/amigo/term/GO:0034704
post-embryonic development	Gene Ontology	GO:0009791	2	11	0.0707391	0.302534	LHX1|CLPS	http://amigo.geneontology.org/amigo/term/GO:0009791
regulation of muscle cell apoptotic process	Gene Ontology	GO:0010660	2	11	0.0707391	0.302534	IGF1|LIFR	http://amigo.geneontology.org/amigo/term/GO:0010660
transcription factor binding	Gene Ontology	GO:0008134	7	99	0.0710022	0.303367	FOS|CCNE1|FOXA3|SCX|PAX2|HLF|FOXH1	http://amigo.geneontology.org/amigo/term/GO:0008134
positive regulation of lipase activity	Gene Ontology	GO:0060193	4	42	0.0712218	0.304012	HTR2A|PNLIP|APOA1|FGFR3	http://amigo.geneontology.org/amigo/term/GO:0060193
positive regulation of multi-organism process	Gene Ontology	GO:0043902	6	80	0.0738093	0.314329	IL12B|LAG3|HPN|CAV1|S100A14|TOP2A	http://amigo.geneontology.org/amigo/term/GO:0043902
positive regulation of protein modification process	Gene Ontology	GO:0031401	19	368	0.0740012	0.314665	MAGEC2|CCL14|NEURL1|DDR2|UBE2S|MUC1|ACSL1|FGFR3|LEP|CDK1|PRKAR2B|ADAM18|MMD|S100A7|CCL21|CAV2|EDN3|ANGPT4|GDF10	http://amigo.geneontology.org/amigo/term/GO:0031401
cellular response to external stimulus	Gene Ontology	GO:0071496	5	61	0.0746633	0.316872	PPARG|NUAK2|PENK|MYOCD|PDK4	http://amigo.geneontology.org/amigo/term/GO:0071496
lung development	Gene Ontology	GO:0030324	5	61	0.0746633	0.316872	SIM2|PKDCC|AGR2|MYOCD|ZIC3	http://amigo.geneontology.org/amigo/term/GO:0030324
transcription corepressor activity	Gene Ontology	GO:0003714	3	26	0.0750792	0.317423	E2F7|RCOR2|SMYD1	http://amigo.geneontology.org/amigo/term/GO:0003714
histone binding	Gene Ontology	GO:0042393	3	26	0.0750792	0.317423	HIST1H4D|ASF1B|HIST2H4A	http://amigo.geneontology.org/amigo/term/GO:0042393
signal release from synapse	Gene Ontology	GO:0099643	3	26	0.0750792	0.317423	SYT5|NTRK2|UNC13A	http://amigo.geneontology.org/amigo/term/GO:0099643
carboxylic ester hydrolase activity	Gene Ontology	GO:0052689	3	26	0.0750792	0.317423	ENPP2|LIPE|FAM135B	http://amigo.geneontology.org/amigo/term/GO:0052689
molecular adaptor activity	Gene Ontology	GO:0060090	4	43	0.0758424	0.319735	TRDN|HSH2D|ANK2|MAPK8IP2	http://amigo.geneontology.org/amigo/term/GO:0060090
early endosome	Gene Ontology	GO:0005769	4	43	0.0758424	0.319735	ANXA1|APOC3|APOA1|DKK1	http://amigo.geneontology.org/amigo/term/GO:0005769
membrane protein complex	Gene Ontology	GO:0098796	11	186	0.0760178	0.32017	IGF1|BMP2|GRIA2|GABRA1|CAV3|CHRNA6|SGCZ|HTR3A|SHISA8|CHRNA9|KCNJ6	http://amigo.geneontology.org/amigo/term/GO:0098796
gland development	Gene Ontology	GO:0048732	9	143	0.077094	0.324143	TGFBR2|INSM1|HOXA5|ZIC3|OXTR|NKX2-3|PITX1|CAV3|CAV1	http://amigo.geneontology.org/amigo/term/GO:0048732
protein localization to extracellular region	Gene Ontology	GO:0071692	6	81	0.0771073	0.324143	BRSK2|ACVR1C|VGF|VIP|CX3CL1|BMP8A	http://amigo.geneontology.org/amigo/term/GO:0071692
viral life cycle	Gene Ontology	GO:0019058	8	122	0.0775875	0.325853	IFNL3|TRIM15|CLEC4G|KPNA7|HTR2A|CAV1|TYRO3|TOP2A	http://amigo.geneontology.org/amigo/term/GO:0019058
fat cell differentiation	Gene Ontology	GO:0045444	5	62	0.0785328	0.329511	IL6|PPARG|FABP4|GDF10|LEP	http://amigo.geneontology.org/amigo/term/GO:0045444
tissue remodeling	Gene Ontology	GO:0048771	6	82	0.0804871	0.332685	PTH1R|RSPO3|SFRP1|ADAM8|CARTPT|CAV1	http://amigo.geneontology.org/amigo/term/GO:0048771
regulation of protein complex disassembly	Gene Ontology	GO:0043244	4	44	0.0806099	0.332685	MAST1|VIL1|LMOD1|CFL2	http://amigo.geneontology.org/amigo/term/GO:0043244
meiosis I cell cycle process	Gene Ontology	GO:0061982	2	12	0.0807146	0.332685	PTTG1|TRIP13	http://amigo.geneontology.org/amigo/term/GO:0061982
positive regulation of chondrocyte differentiation	Gene Ontology	GO:0032332	2	12	0.0807146	0.332685	BMPR1B|ZBTB16	http://amigo.geneontology.org/amigo/term/GO:0032332
reactive oxygen species biosynthetic process	Gene Ontology	GO:1903409	2	12	0.0807146	0.332685	KLF4|CAV1	http://amigo.geneontology.org/amigo/term/GO:1903409
synaptic vesicle cycle	Gene Ontology	GO:0099504	2	12	0.0807146	0.332685	CPLX2|SYT4	http://amigo.geneontology.org/amigo/term/GO:0099504
regulation of cardiac conduction	Gene Ontology	GO:1903779	2	12	0.0807146	0.332685	ATP1A2|NKX2-5	http://amigo.geneontology.org/amigo/term/GO:1903779
ovarian follicle development	Gene Ontology	GO:0001541	2	12	0.0807146	0.332685	VGF|KIT	http://amigo.geneontology.org/amigo/term/GO:0001541
aorta morphogenesis	Gene Ontology	GO:0035909	2	12	0.0807146	0.332685	NPR3|MYLK	http://amigo.geneontology.org/amigo/term/GO:0035909
lipoprotein transport	Gene Ontology	GO:0042953	2	12	0.0807146	0.332685	APOB|APOC3	http://amigo.geneontology.org/amigo/term/GO:0042953
regulation of mitochondrial membrane permeability	Gene Ontology	GO:0046902	2	12	0.0807146	0.332685	TP63|E2F1	http://amigo.geneontology.org/amigo/term/GO:0046902
synaptonemal structure	Gene Ontology	GO:0099086	2	12	0.0807146	0.332685	HORMAD1|RAD51	http://amigo.geneontology.org/amigo/term/GO:0099086
regulation of transcription from RNA polymerase II promoter in response to hypoxia	Gene Ontology	GO:0061418	2	12	0.0807146	0.332685	HIF3A|HLF	http://amigo.geneontology.org/amigo/term/GO:0061418
low-density lipoprotein particle receptor biosynthetic process	Gene Ontology	GO:0045713	2	12	0.0807146	0.332685	PPARG|ADIPOQ	http://amigo.geneontology.org/amigo/term/GO:0045713
mitotic spindle	Gene Ontology	GO:0072686	2	12	0.0807146	0.332685	CENPE|FAM83D	http://amigo.geneontology.org/amigo/term/GO:0072686
autonomic nervous system development	Gene Ontology	GO:0048483	2	12	0.0807146	0.332685	HOXB1|TLX2	http://amigo.geneontology.org/amigo/term/GO:0048483
DNA-binding transcription activator activity	Gene Ontology	GO:0001216	2	12	0.0807146	0.332685	DMRT1|GATA4	http://amigo.geneontology.org/amigo/term/GO:0001216
intracellular ligand-gated ion channel activity	Gene Ontology	GO:0005217	2	12	0.0807146	0.332685	CNGA2|AKAP6	http://amigo.geneontology.org/amigo/term/GO:0005217
cellular response to oxygen levels	Gene Ontology	GO:0071453	3	27	0.081393	0.333621	HN1|TERT|PTGIS	http://amigo.geneontology.org/amigo/term/GO:0071453
columnar/cuboidal epithelial cell differentiation	Gene Ontology	GO:0002065	3	27	0.081393	0.333621	HN1|SOX11|ASCL1	http://amigo.geneontology.org/amigo/term/GO:0002065
renal tubule morphogenesis	Gene Ontology	GO:0061333	3	27	0.081393	0.333621	WT1|FGF2|FGF1	http://amigo.geneontology.org/amigo/term/GO:0061333
formation of primary germ layer	Gene Ontology	GO:0001704	3	27	0.081393	0.333621	SOX2|NR4A3|TLX2	http://amigo.geneontology.org/amigo/term/GO:0001704
negative regulation of establishment of protein localization	Gene Ontology	GO:1904950	3	27	0.081393	0.333621	CX3CL1|IL33|ACVR1C	http://amigo.geneontology.org/amigo/term/GO:1904950
response to starvation	Gene Ontology	GO:0042594	5	63	0.0825078	0.337586	PCK1|FOXA3|SFRP1|ZFP36|SSTR2	http://amigo.geneontology.org/amigo/term/GO:0042594
cellular macromolecule metabolic process	Gene Ontology	GO:0044260	110	2713	0.0825126	0.337586	TGM3|HIST1H4I|HIST1H4H|SCRT2|NKX2-2|LHX2|DSC1|ZSWIM2|IRX6|ADM2|SP8|WT1|STRA8|ENPP2|TMEM100|ELFN2|NKX6-1|BMP3|BRSK2|SPRY2|PI16|AVPR2|GTSE1|APOBEC1|PAK3|DMRT2|NDRG2|SOX11|EGR1|OTX1|TTK|CDK5R2|DLX5|GDF15|ANGPT1|ANGPT4|FOXJ1|TICRR|DNASE1L2|HOXB1|LIN28A|CHST9|HOXC10|HOXC13|GYS2|PAX1|FGF1|KCNH1|PPARG|DDR2|PAX7|CDC20|ITM2A|RET|MAPK15|FABP4|PRKAR2B|KIAA0101|CBX2|PRAME|HYPM|C19orf80|S100A8|CST2|S100A9|ATO…	http://amigo.geneontology.org/amigo/term/GO:0044260
mesenchymal cell differentiation	Gene Ontology	GO:0048762	4	45	0.0855219	0.348612	MAST1|BMP2|SEMA3G|SOX11	http://amigo.geneontology.org/amigo/term/GO:0048762
mitotic DNA damage checkpoint	Gene Ontology	GO:0044773	4	45	0.0855219	0.348612	HUS1B|CCNB1|MUC1|AURKA	http://amigo.geneontology.org/amigo/term/GO:0044773
nucleoside binding	Gene Ontology	GO:0001882	5	64	0.0865873	0.352307	GNAL|GNAT3|MRAS|NGB|EEF1A2	http://amigo.geneontology.org/amigo/term/GO:0001882
aminoglycan metabolic process	Gene Ontology	GO:0006022	5	64	0.0865873	0.352307	PGLYRP3|PRELP|CEMIP|BGN|CHST6	http://amigo.geneontology.org/amigo/term/GO:0006022
regulation of biosynthetic process	Gene Ontology	GO:0009889	60	1407	0.0869796	0.353579	PTH1R|HIST1H4B|HMX2|ELAVL2|HSD17B13|PLK1|TBX20|HIST1H4I|RET|IL21|DSC1|GPLD1|MAPK10|BMPER|MAGEA1|ADCYAP1R1|HIST2H4A|IRG1|LHX3|APOB|PROX1|INHBA|CCNE1|SOHLH1|ALX4|NEURL1|HTR2A|SCX|AURKB|DLX4|TERT|THRSP|TOP2A|UTS2|WT1|ASCL1|STRA8|ASCL2|HIST2H2AC|SLC24A5|CHRDL1|LDB2|GBX2|TCEAL5|NKX2-5|GATA4|FGF2|CIDEA|CA9|SFRP1|HOXD12|ADAM8|DKK1|TYMS|GALR1|OPRD1|HLF|GDF10|CSF3|RRM2	http://amigo.geneontology.org/amigo/term/GO:0009889
cofactor binding	Gene Ontology	GO:0048037	6	84	0.0874908	0.355152	AOC1|CYP1A1|HHIPL2|CYP21A2|EPO|HAO1	http://amigo.geneontology.org/amigo/term/GO:0048037
positive regulation of hemopoiesis	Gene Ontology	GO:1903708	3	28	0.0879272	0.355152	ANXA1|FOXP3|CD80	http://amigo.geneontology.org/amigo/term/GO:1903708
regulation of phosphatidylinositol 3-kinase signaling	Gene Ontology	GO:0014066	3	28	0.0879272	0.355152	LEP|FGF1|KIT	http://amigo.geneontology.org/amigo/term/GO:0014066
heart trabecula formation	Gene Ontology	GO:0060347	3	28	0.0879272	0.355152	TGFBR3|ADAMTS1|CAV3	http://amigo.geneontology.org/amigo/term/GO:0060347
negative regulation of intrinsic apoptotic signaling pathway	Gene Ontology	GO:2001243	3	28	0.0879272	0.355152	MAGEA3|PDX1|MUC1	http://amigo.geneontology.org/amigo/term/GO:2001243
actin filament bundle organization	Gene Ontology	GO:0061572	3	28	0.0879272	0.355152	KISS1R|TMEFF2|S1PR1	http://amigo.geneontology.org/amigo/term/GO:0061572
myofibril	Gene Ontology	GO:0030016	3	28	0.0879272	0.355152	ABRA|SPTBN1|CFL2	http://amigo.geneontology.org/amigo/term/GO:0030016
positive regulation of secretion by cell	Gene Ontology	GO:1903532	4	46	0.0905759	0.361998	SYT1|KISS1|FGG|CLEC6A	http://amigo.geneontology.org/amigo/term/GO:1903532
synaptic transmission, dopaminergic	Gene Ontology	GO:0001963	2	13	0.0910913	0.361998	TH|CRHBP	http://amigo.geneontology.org/amigo/term/GO:0001963
positive regulation of triglyceride biosynthetic process	Gene Ontology	GO:0010867	2	13	0.0910913	0.361998	DGAT2|GPLD1	http://amigo.geneontology.org/amigo/term/GO:0010867
localization within membrane	Gene Ontology	GO:0051668	2	13	0.0910913	0.361998	PIGR|NLGN1	http://amigo.geneontology.org/amigo/term/GO:0051668
positive regulation of dendritic spine development	Gene Ontology	GO:0060999	2	13	0.0910913	0.361998	NRG1|NLGN1	http://amigo.geneontology.org/amigo/term/GO:0060999
positive regulation of insulin secretion	Gene Ontology	GO:0032024	2	13	0.0910913	0.361998	TRH|NNAT	http://amigo.geneontology.org/amigo/term/GO:0032024
non-recombinational repair	Gene Ontology	GO:0000726	2	13	0.0910913	0.361998	HIST1H4L|HIST2H4A	http://amigo.geneontology.org/amigo/term/GO:0000726
midbrain development	Gene Ontology	GO:0030901	2	13	0.0910913	0.361998	NDRG2|DKK1	http://amigo.geneontology.org/amigo/term/GO:0030901
regulation of stem cell proliferation	Gene Ontology	GO:0072091	2	13	0.0910913	0.361998	ASPM|DCT	http://amigo.geneontology.org/amigo/term/GO:0072091
regulation of epidermal growth factor receptor signaling pathway	Gene Ontology	GO:0042058	2	13	0.0910913	0.361998	SPRY2|PTK6	http://amigo.geneontology.org/amigo/term/GO:0042058
platelet alpha granule	Gene Ontology	GO:0031091	2	13	0.0910913	0.361998	ORM1|PF4	http://amigo.geneontology.org/amigo/term/GO:0031091
positive regulation of dendrite development	Gene Ontology	GO:1900006	2	13	0.0910913	0.361998	NRG1|RELN	http://amigo.geneontology.org/amigo/term/GO:1900006
voltage-gated calcium channel activity	Gene Ontology	GO:0005245	2	13	0.0910913	0.361998	CACNG1|TMC2	http://amigo.geneontology.org/amigo/term/GO:0005245
rough endoplasmic reticulum	Gene Ontology	GO:0005791	2	13	0.0910913	0.361998	TP63|MT3	http://amigo.geneontology.org/amigo/term/GO:0005791
regulation of multicellular organism growth	Gene Ontology	GO:0040014	2	13	0.0910913	0.361998	ADRB2|GHR	http://amigo.geneontology.org/amigo/term/GO:0040014
cellular response to chemokine	Gene Ontology	GO:1990869	2	13	0.0910913	0.361998	CCL20|CCL24	http://amigo.geneontology.org/amigo/term/GO:1990869
blood vessel development	Gene Ontology	GO:0001568	19	381	0.0942697	0.37389	CDH2|CXCL17|LRG1|CD34|EGR1|RAMP1|E2F8|HN1|CX3CL1|GPC3|STAB2|FGF1|MYOCD|CXCL10|GATA4|SOX17|TCF21|SERPINB7|CAV1	http://amigo.geneontology.org/amigo/term/GO:0001568
cellular response to heat	Gene Ontology	GO:0034605	3	29	0.0946739	0.37389	CXCL10|CRYAB|MKI67	http://amigo.geneontology.org/amigo/term/GO:0034605
plasma membrane signaling receptor complex	Gene Ontology	GO:0098802	3	29	0.0946739	0.37389	CHRNA6|GRIA4|HTR3A	http://amigo.geneontology.org/amigo/term/GO:0098802
regulation of establishment of planar polarity	Gene Ontology	GO:0090175	3	29	0.0946739	0.37389	RSPO3|SFRP1|GPC3	http://amigo.geneontology.org/amigo/term/GO:0090175
outflow tract morphogenesis	Gene Ontology	GO:0003151	3	29	0.0946739	0.37389	TBX20|CLDN5|NKX2-5	http://amigo.geneontology.org/amigo/term/GO:0003151
glycosaminoglycan biosynthetic process	Gene Ontology	GO:0006024	3	29	0.0946739	0.37389	HS3ST5|GPC3|ANGPT1	http://amigo.geneontology.org/amigo/term/GO:0006024
lysosome	Gene Ontology	GO:0005764	6	86	0.0948169	0.374122	EEF1A2|ADRB2|TSPAN1|FHL5|PRELP|GFAP	http://amigo.geneontology.org/amigo/term/GO:0005764
RNA polymerase II cis-regulatory region sequence-specific DNA binding	Gene Ontology	GO:0000978	5	66	0.0950558	0.374731	HOXA2|CEBPA|DDN|MEOX2|FOS	http://amigo.geneontology.org/amigo/term/GO:0000978
regulation of protein stability	Gene Ontology	GO:0031647	4	47	0.0957694	0.376874	PLK1|TERT|APOA1|NGB	http://amigo.geneontology.org/amigo/term/GO:0031647
cellular macromolecule localization	Gene Ontology	GO:0070727	13	241	0.097071	0.381658	TP63|RAB26|E2F1|PEX5L|CFD|CNTNAP2|AURKA|COL1A1|KCNB1|CDH2|SCN3B|SPTBN1|KCNA1	http://amigo.geneontology.org/amigo/term/GO:0070727
ubiquitin-protein transferase activity	Gene Ontology	GO:0004842	6	87	0.0985994	0.387324	KLHL33|KLHL31|PLK1|BIRC5|ZSWIM2|CDC20B	http://amigo.geneontology.org/amigo/term/GO:0004842
regulation of developmental growth	Gene Ontology	GO:0048638	5	67	0.0994423	0.389944	SYT1|GAL|FGF2|RIMS2|PLXNA4	http://amigo.geneontology.org/amigo/term/GO:0048638
ethanol oxidation	Gene Ontology	GO:0006069	3	30	0.101625	0.394425	ADH1B|ADH1A|ADH4	http://amigo.geneontology.org/amigo/term/GO:0006069
neurotransmitter metabolic process	Gene Ontology	GO:0042133	3	30	0.101625	0.394425	GLDC|NAALAD2|DMGDH	http://amigo.geneontology.org/amigo/term/GO:0042133
organelle outer membrane	Gene Ontology	GO:0031968	3	30	0.101625	0.394425	MYOC|NXNL1|MAOA	http://amigo.geneontology.org/amigo/term/GO:0031968
regulation of dephosphorylation	Gene Ontology	GO:0035303	3	30	0.101625	0.394425	PPP1R1A|SLC7A14|PTN	http://amigo.geneontology.org/amigo/term/GO:0035303
cochlea morphogenesis	Gene Ontology	GO:0090103	2	14	0.10183	0.394425	HPN|PAX2	http://amigo.geneontology.org/amigo/term/GO:0090103
N-methyltransferase activity	Gene Ontology	GO:0008170	2	14	0.10183	0.394425	DYDC1|EZH2	http://amigo.geneontology.org/amigo/term/GO:0008170
neuron projection regeneration	Gene Ontology	GO:0031102	2	14	0.10183	0.394425	GFAP|TNR	http://amigo.geneontology.org/amigo/term/GO:0031102
ion channel binding	Gene Ontology	GO:0044325	2	14	0.10183	0.394425	TRDN|SCN3B	http://amigo.geneontology.org/amigo/term/GO:0044325
regulation of transcription involved in cell fate commitment	Gene Ontology	GO:0060850	2	14	0.10183	0.394425	DLX2|NKX6-1	http://amigo.geneontology.org/amigo/term/GO:0060850
recycling endosome	Gene Ontology	GO:0055037	2	14	0.10183	0.394425	LAMP5|SYT5	http://amigo.geneontology.org/amigo/term/GO:0055037
cyclin-dependent protein serine/threonine kinase activity	Gene Ontology	GO:0004693	2	14	0.10183	0.394425	CDK1|CDC6	http://amigo.geneontology.org/amigo/term/GO:0004693
phosphatidylinositol 3-kinase activity	Gene Ontology	GO:0035004	2	14	0.10183	0.394425	FGF5|PIK3C2G	http://amigo.geneontology.org/amigo/term/GO:0035004
chloride channel activity	Gene Ontology	GO:0005254	2	14	0.10183	0.394425	SLC17A7|GABRA3	http://amigo.geneontology.org/amigo/term/GO:0005254
response to oxygen-containing compound	Gene Ontology	GO:1901700	42	960	0.102127	0.395231	PTGFR|DGAT2|TRIM72|PTK6|RPE65|FOSB|D4S234E|ELANE|GPLD1|SLC5A5|EDNRB|GNAI1|PTN|KLF15|CCNE1|GAL|S100A8|TH|PENK|GNG3|IGF1|ILDR2|SOD3|ASCL1|CRHBP|TFF1|PPARG|HTR4|UMODL1|FFAR3|HBA2|GJB2|HOXB13|AKAP6|AVPR2|SLC7A11|CCL7|ADRB2|SSTR2|PDK4|COL1A1|FGF21	http://amigo.geneontology.org/amigo/term/GO:1901700
epithelial cell proliferation	Gene Ontology	GO:0050673	12	222	0.106534	0.410962	ESR2|TNMD|SOX11|IL6|KRT2|HOXA5|BMPER|NR4A3|DLX5|SCN5A|CAV2|FGF1	http://amigo.geneontology.org/amigo/term/GO:0050673
epithelium migration	Gene Ontology	GO:0090132	4	49	0.106563	0.410962	HN1|MAST1|ANLN|KIT	http://amigo.geneontology.org/amigo/term/GO:0090132
lipase activity	Gene Ontology	GO:0016298	3	31	0.108773	0.41803	ANXA1|PNLIP|APOA1	http://amigo.geneontology.org/amigo/term/GO:0016298
cellular response to nutrient levels	Gene Ontology	GO:0031669	3	31	0.108773	0.41803	NUPR1L|NUAK2|PENK	http://amigo.geneontology.org/amigo/term/GO:0031669
positive regulation of leukocyte cell-cell adhesion	Gene Ontology	GO:1903039	3	31	0.108773	0.41803	FOXP3|IGF1|ZBTB16	http://amigo.geneontology.org/amigo/term/GO:1903039
epiboly	Gene Ontology	GO:0090504	2	15	0.112894	0.42867	MME|MMP12	http://amigo.geneontology.org/amigo/term/GO:0090504
receptor-mediated endocytosis of virus by host cell	Gene Ontology	GO:0019065	2	15	0.112894	0.42867	CAV2|CAV1	http://amigo.geneontology.org/amigo/term/GO:0019065
mechanoreceptor differentiation	Gene Ontology	GO:0042490	2	15	0.112894	0.42867	LHFPL5|NTF4	http://amigo.geneontology.org/amigo/term/GO:0042490
negative regulation of dephosphorylation	Gene Ontology	GO:0035305	2	15	0.112894	0.42867	CASC5|PPP1R14A	http://amigo.geneontology.org/amigo/term/GO:0035305
positive regulation of endothelial cell differentiation	Gene Ontology	GO:0045603	2	15	0.112894	0.42867	HN1|CLDN5	http://amigo.geneontology.org/amigo/term/GO:0045603
kinase inhibitor activity	Gene Ontology	GO:0019210	2	15	0.112894	0.42867	SPRY2|LRRC15	http://amigo.geneontology.org/amigo/term/GO:0019210
steroid hormone receptor binding	Gene Ontology	GO:0035258	2	15	0.112894	0.42867	FOXH1|CCNE1	http://amigo.geneontology.org/amigo/term/GO:0035258
regulation of morphogenesis of a branching structure	Gene Ontology	GO:0060688	2	15	0.112894	0.42867	CAV3|PAX2	http://amigo.geneontology.org/amigo/term/GO:0060688
ribonucleoside bisphosphate biosynthetic process	Gene Ontology	GO:0034030	2	15	0.112894	0.42867	ACSL1|ACACB	http://amigo.geneontology.org/amigo/term/GO:0034030
cargo receptor activity	Gene Ontology	GO:0038024	2	15	0.112894	0.42867	OLR1|STAB2	http://amigo.geneontology.org/amigo/term/GO:0038024
peptidyl-lysine methylation	Gene Ontology	GO:0018022	2	15	0.112894	0.42867	DYDC2|SPP1	http://amigo.geneontology.org/amigo/term/GO:0018022
apical junction complex	Gene Ontology	GO:0043296	2	15	0.112894	0.42867	CLDN9|CLDN11	http://amigo.geneontology.org/amigo/term/GO:0043296
purine nucleoside diphosphate metabolic process	Gene Ontology	GO:0009135	2	15	0.112894	0.42867	PFKFB1|MYOG	http://amigo.geneontology.org/amigo/term/GO:0009135
multi-organism transport	Gene Ontology	GO:0044766	2	15	0.112894	0.42867	CD209|KPNA2	http://amigo.geneontology.org/amigo/term/GO:0044766
phosphoprotein phosphatase activity	Gene Ontology	GO:0004721	3	32	0.116108	0.438619	TPTE|PTN|DLGAP5	http://amigo.geneontology.org/amigo/term/GO:0004721
cytoplasmic ribonucleoprotein granule	Gene Ontology	GO:0036464	3	32	0.116108	0.438619	IGF2BP1|ZFP36|LIN28A	http://amigo.geneontology.org/amigo/term/GO:0036464
nephron morphogenesis	Gene Ontology	GO:0072028	3	32	0.116108	0.438619	LHX1|GPC3|TCF21	http://amigo.geneontology.org/amigo/term/GO:0072028
endoplasmic reticulum lumen	Gene Ontology	GO:0005788	3	32	0.116108	0.438619	TRDN|F2|F7	http://amigo.geneontology.org/amigo/term/GO:0005788
regulation of hemopoiesis	Gene Ontology	GO:1903706	4	51	0.117878	0.444927	HIST1H4B|LEF1|ZBTB16|IL12B	http://amigo.geneontology.org/amigo/term/GO:1903706
cellular response to decreased oxygen levels	Gene Ontology	GO:0036294	3	33	0.123623	0.4619	HN1|CA9|S100B	http://amigo.geneontology.org/amigo/term/GO:0036294
receptor metabolic process	Gene Ontology	GO:0043112	3	33	0.123623	0.4619	LRRTM2|GPRASP1|FGF21	http://amigo.geneontology.org/amigo/term/GO:0043112
cell differentiation in spinal cord	Gene Ontology	GO:0021515	3	33	0.123623	0.4619	ISL2|LBX1|OLIG2	http://amigo.geneontology.org/amigo/term/GO:0021515
spinal cord motor neuron differentiation	Gene Ontology	GO:0021522	3	33	0.123623	0.4619	LHX3|ISL2|LBX1	http://amigo.geneontology.org/amigo/term/GO:0021522
lyase activity	Gene Ontology	GO:0016829	3	33	0.123623	0.4619	ACO1|EDNRB|CA4	http://amigo.geneontology.org/amigo/term/GO:0016829
cation channel complex	Gene Ontology	GO:0034703	3	33	0.123623	0.4619	SCN11A|SHISA9|KCNG1	http://amigo.geneontology.org/amigo/term/GO:0034703
myelin sheath	Gene Ontology	GO:0043209	3	33	0.123623	0.4619	DRP2|EEF1A2|GSN	http://amigo.geneontology.org/amigo/term/GO:0043209
anatomical structure maturation	Gene Ontology	GO:0071695	3	33	0.123623	0.4619	TYMS|IGF1|ALDH1A2	http://amigo.geneontology.org/amigo/term/GO:0071695
biological regulation	Gene Ontology	GO:0065007	166	4289	0.123759	0.4619	ELANE|MALRD1|PRLH|BGN|HBB|IL21|JPH3|PKDCC|APCDD1|CAV3|KIF2C|LHX2|LHX3|PARD6B|NTRK2|PROKR1|DAZL|NPR3|CRB2|HTR4|DEPDC1B|FOXH1|SERPINB7|NKX6-1|SPINK4|BMP2|TNMD|ZNF280A|KIT|KPNA7|SCX|GFRA2|PID1|SLC4A1|LRTM2|GDF10|DMRT1|DMRT2|GPR158|ELAVL2|CDKN1C|KCNG1|DES|NTSR1|PROL1|KREMEN2|SRPX|MNX1|PPP1R1A|LEP|LILRB5|NEK2|EXO1|MT1M|VIL1|ZIC3|CDK5R2|SCT|TOP2A|FOXJ1|TFR2|MRAS|HOXC11|PPARG|SMYD1|F10|FGF4|FGF2|ARNT2|C…	http://amigo.geneontology.org/amigo/term/GO:0065007
enzyme linked receptor protein signaling pathway	Gene Ontology	GO:0007167	15	300	0.12376	0.4619	MYH6|GHR|F7|CDKN1C|SOX11|PTK6|TXNIP|GRIN2B|SCX|MYOCD|ANGPTL1|PID1|FGF5|FOS|PAK3	http://amigo.geneontology.org/amigo/term/GO:0007167
DNA polymerase activity	Gene Ontology	GO:0034061	2	16	0.124249	0.4619	MAPK15|AURKB	http://amigo.geneontology.org/amigo/term/GO:0034061
ciliary plasm	Gene Ontology	GO:0097014	2	16	0.124249	0.4619	SPEF1|CCDC151	http://amigo.geneontology.org/amigo/term/GO:0097014
vesicle lumen	Gene Ontology	GO:0031983	2	16	0.124249	0.4619	FGG|PCSK1	http://amigo.geneontology.org/amigo/term/GO:0031983
neurotrophin signaling pathway	Gene Ontology	GO:0038179	2	16	0.124249	0.4619	SPRY2|CAV3	http://amigo.geneontology.org/amigo/term/GO:0038179
negative regulation of phosphatase activity	Gene Ontology	GO:0010923	2	16	0.124249	0.4619	PTN|PKMYT1	http://amigo.geneontology.org/amigo/term/GO:0010923
modified amino acid binding	Gene Ontology	GO:0072341	2	16	0.124249	0.4619	SYT1|SYT4	http://amigo.geneontology.org/amigo/term/GO:0072341
regulation of DNA-templated transcription in response to stress	Gene Ontology	GO:0043620	2	16	0.124249	0.4619	HN1|MUC1	http://amigo.geneontology.org/amigo/term/GO:0043620
skeletal system development	Gene Ontology	GO:0001501	11	206	0.125446	0.465909	LEP|TGFBR2|HOXB1|SIX2|COL9A1|CYP26B1|EN1|PAX1|NKX3-2|COL2A1|RAX	http://amigo.geneontology.org/amigo/term/GO:0001501
organ growth	Gene Ontology	GO:0035265	6	94	0.127235	0.47142	S1PR1|PSAPL1|PROX1|HN1|MYOCD|FGFR3	http://amigo.geneontology.org/amigo/term/GO:0035265
protein kinase binding	Gene Ontology	GO:0019901	6	94	0.127235	0.47142	CDKN2A|GHR|KIF14|PRKAR2B|FAM83A|PRC1	http://amigo.geneontology.org/amigo/term/GO:0019901
regulation of cellular amide metabolic process	Gene Ontology	GO:0034248	4	53	0.129688	0.478908	SOX11|NAT1|S100A9|EIF4E1B	http://amigo.geneontology.org/amigo/term/GO:0034248
cartilage development	Gene Ontology	GO:0051216	4	53	0.129688	0.478908	PTH1R|BMPR1B|PKDCC|COL9A1	http://amigo.geneontology.org/amigo/term/GO:0051216
regulation of actin filament organization	Gene Ontology	GO:0110053	3	34	0.131308	0.484084	CAPZA3|VIL1|CFL2	http://amigo.geneontology.org/amigo/term/GO:0110053
regulation of proteasomal protein catabolic process	Gene Ontology	GO:0061136	3	34	0.131308	0.484084	CEBPA|IL33|AURKA	http://amigo.geneontology.org/amigo/term/GO:0061136
vacuole	Gene Ontology	GO:0005773	6	95	0.131624	0.484843	CD1A|CGA|CHGA|KIT|TSPAN1|NEU4	http://amigo.geneontology.org/amigo/term/GO:0005773
protein serine/threonine kinase activity	Gene Ontology	GO:0004674	7	117	0.132245	0.486325	PNCK|NGB|CDKN3|ACSL1|CDKN1C|NRG1|PROX1	http://amigo.geneontology.org/amigo/term/GO:0004674
cellular protein complex disassembly	Gene Ontology	GO:0043624	7	117	0.132245	0.486325	CAPZA3|TMOD1|MAST1|KIF2C|NRG1|SPTBN1|GSN	http://amigo.geneontology.org/amigo/term/GO:0043624
glycosylation	Gene Ontology	GO:0070085	5	74	0.132856	0.486954	MT3|MUC1|KCNE1|MGAT5B|MUC19	http://amigo.geneontology.org/amigo/term/GO:0070085
ribonucleoside binding	Gene Ontology	GO:0032549	5	74	0.132856	0.486954	NPR1|GNAT3|TUBB4A|MRAS|GNAI1	http://amigo.geneontology.org/amigo/term/GO:0032549
negative regulation of transport	Gene Ontology	GO:0051051	15	304	0.133181	0.487744	TRH|ACVR1C|CGA|CD34|MMP9|SYT4|CRHBP|STXBP5L|CHGA|APOC3|OXTR|CX3CL1|APOA1|FFAR4|ATP1A2	http://amigo.geneontology.org/amigo/term/GO:0051051
response to unfolded protein	Gene Ontology	GO:0006986	4	54	0.135771	0.493085	CASP12|IGFBP1|SPP1|CREB3L1	http://amigo.geneontology.org/amigo/term/GO:0006986
response to insulin	Gene Ontology	GO:0032868	4	54	0.135771	0.493085	SERPINA12|PPARG|PRLH|GPLD1	http://amigo.geneontology.org/amigo/term/GO:0032868
neuron to neuron synapse	Gene Ontology	GO:0098984	2	17	0.135862	0.493085	NETO1|P2RX6	http://amigo.geneontology.org/amigo/term/GO:0098984
negative regulation of smooth muscle cell proliferation	Gene Ontology	GO:0048662	2	17	0.135862	0.493085	NPR1|ESR2	http://amigo.geneontology.org/amigo/term/GO:0048662
anion channel activity	Gene Ontology	GO:0005253	2	17	0.135862	0.493085	SGK2|GLRA4	http://amigo.geneontology.org/amigo/term/GO:0005253
postsynaptic specialization	Gene Ontology	GO:0099572	2	17	0.135862	0.493085	SYNDIG1|BCAS1	http://amigo.geneontology.org/amigo/term/GO:0099572
negative regulation of striated muscle cell differentiation	Gene Ontology	GO:0051154	2	17	0.135862	0.493085	BMP2|DKK1	http://amigo.geneontology.org/amigo/term/GO:0051154
respirasome	Gene Ontology	GO:0070469	2	17	0.135862	0.493085	COX7A1|COX6A2	http://amigo.geneontology.org/amigo/term/GO:0070469
positive regulation of proteolysis involved in cellular protein catabolic process	Gene Ontology	GO:1903052	2	17	0.135862	0.493085	PLK1|CAV3	http://amigo.geneontology.org/amigo/term/GO:1903052
meiotic nuclear division	Gene Ontology	GO:0140013	2	17	0.135862	0.493085	RAD51|CDC20	http://amigo.geneontology.org/amigo/term/GO:0140013
regulation of actin filament bundle assembly	Gene Ontology	GO:0032231	2	17	0.135862	0.493085	KISS1R|PPM1E	http://amigo.geneontology.org/amigo/term/GO:0032231
cell maturation	Gene Ontology	GO:0048469	8	141	0.138352	0.501299	CDKN1C|ASCL1|RET|LGI4|GAL|C19orf80|CCL21|HOXB13	http://amigo.geneontology.org/amigo/term/GO:0048469
nucleoside bisphosphate metabolic process	Gene Ontology	GO:0033865	3	35	0.139156	0.502571	GPAM|TDO2|PDK4	http://amigo.geneontology.org/amigo/term/GO:0033865
cellular response to toxic substance	Gene Ontology	GO:0097237	3	35	0.139156	0.502571	EPO|SOD3|CD36	http://amigo.geneontology.org/amigo/term/GO:0097237
regulation of autophagy of mitochondrion in response to mitochondrial depolarization	Gene Ontology	GO:1904923	3	35	0.139156	0.502571	GABRA5|MYOM1|PGK2	http://amigo.geneontology.org/amigo/term/GO:1904923
regulation of supramolecular fiber organization	Gene Ontology	GO:1902903	3	35	0.139156	0.502571	TMEFF2|TACR1|NPHS1	http://amigo.geneontology.org/amigo/term/GO:1902903
response to oxidative stress	Gene Ontology	GO:0006979	9	166	0.145791	0.523212	GPR37L1|CCNA2|EPO|GJB2|CRYAB|MELK|KLF4|DPEP1|ADIPOQ	http://amigo.geneontology.org/amigo/term/GO:0006979
cellular response to peptide hormone stimulus	Gene Ontology	GO:0071375	3	36	0.147158	0.523212	SLC2A4|GNG11|MAS1	http://amigo.geneontology.org/amigo/term/GO:0071375
negative regulation of apoptotic signaling pathway	Gene Ontology	GO:2001234	3	36	0.147158	0.523212	PDX1|IGF1|COL2A1	http://amigo.geneontology.org/amigo/term/GO:2001234
ribonucleoside bisphosphate metabolic process	Gene Ontology	GO:0033875	3	36	0.147158	0.523212	GPAM|GLYAT|ACACB	http://amigo.geneontology.org/amigo/term/GO:0033875
cellular response to oxygen-containing compound	Gene Ontology	GO:1901701	25	559	0.147568	0.523212	PAX2|DPEP1|AKR1C2|GPAM|TDPX2|RYR3|P2RY12|NEURL1|CDC6|MLXIPL|CYP21A2|CRHBP|PPARG|HTR4|IGFBP1|HTR1E|CXCL10|GPR37L1|CCNB1|ESR2|CDK1|APOBEC1|GNG2|PTPRN|MMP3	http://amigo.geneontology.org/amigo/term/GO:1901701
positive regulation of translation	Gene Ontology	GO:0045727	2	18	0.147703	0.523212	LIN28A|DAZL	http://amigo.geneontology.org/amigo/term/GO:0045727
glycolipid metabolic process	Gene Ontology	GO:0006664	2	18	0.147703	0.523212	CWH43|NEU4	http://amigo.geneontology.org/amigo/term/GO:0006664
clathrin-coated vesicle	Gene Ontology	GO:0030136	2	18	0.147703	0.523212	RASSF9|SLC2A4	http://amigo.geneontology.org/amigo/term/GO:0030136
cyclin-dependent protein kinase activity	Gene Ontology	GO:0097472	2	18	0.147703	0.523212	CDK1|CDC6	http://amigo.geneontology.org/amigo/term/GO:0097472
cellular response to light stimulus	Gene Ontology	GO:0071482	2	18	0.147703	0.523212	TRPM1|HIST3H2A	http://amigo.geneontology.org/amigo/term/GO:0071482
regulation of calcium ion transmembrane transport	Gene Ontology	GO:1903169	2	18	0.147703	0.523212	DMD|ATP1A2	http://amigo.geneontology.org/amigo/term/GO:1903169
regulation of proteasomal ubiquitin-dependent protein catabolic process	Gene Ontology	GO:0032434	2	18	0.147703	0.523212	IL33|CAV1	http://amigo.geneontology.org/amigo/term/GO:0032434
maintenance of cell number	Gene Ontology	GO:0098727	2	18	0.147703	0.523212	FOXD3|SIX2	http://amigo.geneontology.org/amigo/term/GO:0098727
cranial nerve development	Gene Ontology	GO:0021545	2	18	0.147703	0.523212	SLITRK6|PLXNA4	http://amigo.geneontology.org/amigo/term/GO:0021545
kinetochore	Gene Ontology	GO:0000776	2	18	0.147703	0.523212	MEIKIN|KIF18A	http://amigo.geneontology.org/amigo/term/GO:0000776
negative regulation of lymphocyte differentiation	Gene Ontology	GO:0045620	2	18	0.147703	0.523212	ANXA1|PGLYRP2	http://amigo.geneontology.org/amigo/term/GO:0045620
cytokine binding	Gene Ontology	GO:0019955	2	18	0.147703	0.523212	ZFP36|ACKR1	http://amigo.geneontology.org/amigo/term/GO:0019955
negative regulation of lipid catabolic process	Gene Ontology	GO:0050995	2	18	0.147703	0.523212	HCAR2|APOC3	http://amigo.geneontology.org/amigo/term/GO:0050995
tight junction	Gene Ontology	GO:0070160	2	18	0.147703	0.523212	CLDN8|CLMP	http://amigo.geneontology.org/amigo/term/GO:0070160
focal adhesion assembly	Gene Ontology	GO:0048041	2	18	0.147703	0.523212	MAST1|ACTN2	http://amigo.geneontology.org/amigo/term/GO:0048041
aromatic compound biosynthetic process	Gene Ontology	GO:0019438	71	1761	0.148094	0.523551	HIST1H4B|HMX2|TRIM15|DTX1|HIST1H4E|PDE2A|HMGB3|FOSB|ZNF695|CD36|HIST1H2AL|DSC1|MYOCD|EDNRB|NKX2-2|KIAA0101|MYBL2|MNX1|PAX1|IFNL1|CEBPA|HIST1H3I|MYH6|ZBTB16|HOXA6|EGR3|EGR1|APOBEC1|SIX3|HIST1H4K|S100A9|RELN|AURKB|THRSP|DCT|HIST2H2AA4|DLX2|ATOH8|CCNE1|WT1|INSM1|LBX1|AMH|DMP1|SLC24A5|CHRDL1|SOX17|PYDC1|SALL4|HIST2H3D|TCEAL7|IL33|TCEAL5|DKK1|HIST1H1D|FGF4|HIST2H2AC|FGF1|HIST1H1C|DYDC2|PRDM13|E2F1|MAE…	http://amigo.geneontology.org/amigo/term/GO:0019438
DNA-binding transcription factor binding	Gene Ontology	GO:0140297	4	56	0.148271	0.523551	FOXP3|FOXH1|OASL|ARNT2	http://amigo.geneontology.org/amigo/term/GO:0140297
inner ear development	Gene Ontology	GO:0048839	4	56	0.148271	0.523551	NR4A3|HMX2|OTX1|COL11A1	http://amigo.geneontology.org/amigo/term/GO:0048839
small GTPase binding	Gene Ontology	GO:0031267	5	77	0.148532	0.524058	ACTN2|BIRC5|ADCYAP1R1|DOCK11|ARTN	http://amigo.geneontology.org/amigo/term/GO:0031267
regulation of epithelial cell proliferation	Gene Ontology	GO:0050678	11	215	0.152373	0.536756	TP63|MMP12|CCL11|CDKN1C|CCL24|LEP|TACR1|MME|DLX6|PROX1|ALDH1A2	http://amigo.geneontology.org/amigo/term/GO:0050678
RNA metabolic process	Gene Ontology	GO:0016070	55	1342	0.153867	0.541589	HIST1H4A|EXO1|TRIM15|NR3C2|HIST1H4K|ISL2|HIST1H2AL|EZH2|HIST1H2AH|DQX1|MYOG|SSX1|HIST2H4A|IRG1|DDN|GATA5|LHX9|HIST1H4D|OTX1|KLF4|SOX17|GAL|TBX15|DLX4|MAPK15|FOXG1|THRSP|MYT1|WT1|TFR2|KLHL31|ASCL2|LIN28B|ASCL4|FOXD1|POU4F1|HOXC13|TCEAL7|DPRX|HIST1H1D|TRIP13|GBX2|HOXB13|CA9|HOXC10|DMRTA2|HOXD12|ZFP42|CSF3|VIP|TMTC1|MT3|PID1|CEBPA|MCIDAS	http://amigo.geneontology.org/amigo/term/GO:0016070
glycoprotein metabolic process	Gene Ontology	GO:0009100	6	100	0.15461	0.54359	ADAMTS5|ALG1L|COL11A1|MUC1|NDST4|HS6ST3	http://amigo.geneontology.org/amigo/term/GO:0009100
organelle disassembly	Gene Ontology	GO:1903008	3	37	0.155304	0.543625	MYH11|PGK2|HAPLN1	http://amigo.geneontology.org/amigo/term/GO:1903008
ATPase activity, coupled	Gene Ontology	GO:0042623	3	37	0.155304	0.543625	PIF1|UHRF1|KIF4A	http://amigo.geneontology.org/amigo/term/GO:0042623
positive regulation of cation channel activity	Gene Ontology	GO:2001259	3	37	0.155304	0.543625	JPH2|GAL|RELN	http://amigo.geneontology.org/amigo/term/GO:2001259
entry into host	Gene Ontology	GO:0044409	3	37	0.155304	0.543625	CLEC5A|CAV2|CAV1	http://amigo.geneontology.org/amigo/term/GO:0044409
negative regulation of neuron death	Gene Ontology	GO:1901215	3	37	0.155304	0.543625	GABRA5|MT3|ANGPT1	http://amigo.geneontology.org/amigo/term/GO:1901215
response to toxic substance	Gene Ontology	GO:0009636	19	412	0.155664	0.544457	TRH|SOD3|CYP2F1|DRP2|NR4A3|EGR1|SCN9A|LEP|GPX3|ATP1A2|TH|OXTR|SLC6A4|TRPA1|GNAT3|ADCYAP1R1|SCN3A|PAX2|S100A8	http://amigo.geneontology.org/amigo/term/GO:0009636
negative regulation of cellular component movement	Gene Ontology	GO:0051271	5	79	0.159397	0.553478	TGFBR3|TMEFF2|CXCL13|FGF2|SEMA3D	http://amigo.geneontology.org/amigo/term/GO:0051271
negative regulation of blood vessel morphogenesis	Gene Ontology	GO:2000181	2	19	0.159741	0.553478	ADRB2|PF4	http://amigo.geneontology.org/amigo/term/GO:2000181
brush border	Gene Ontology	GO:0005903	2	19	0.159741	0.553478	SCT|SLC22A12	http://amigo.geneontology.org/amigo/term/GO:0005903
regulation of generation of precursor metabolites and energy	Gene Ontology	GO:0043467	2	19	0.159741	0.553478	GCGR|HTR2A	http://amigo.geneontology.org/amigo/term/GO:0043467
RNA polymerase II transcription factor complex	Gene Ontology	GO:0090575	2	19	0.159741	0.553478	GATA4|NEUROD1	http://amigo.geneontology.org/amigo/term/GO:0090575
regulation of ERBB signaling pathway	Gene Ontology	GO:1901184	2	19	0.159741	0.553478	ESR2|MMP9	http://amigo.geneontology.org/amigo/term/GO:1901184
camera-type eye morphogenesis	Gene Ontology	GO:0048593	2	19	0.159741	0.553478	EPHB1|SIX3	http://amigo.geneontology.org/amigo/term/GO:0048593
cullin-RING ubiquitin ligase complex	Gene Ontology	GO:0031461	2	19	0.159741	0.553478	KLHL33|KLHL30	http://amigo.geneontology.org/amigo/term/GO:0031461
thalamus development	Gene Ontology	GO:0021794	2	19	0.159741	0.553478	GBX2|OLIG2	http://amigo.geneontology.org/amigo/term/GO:0021794
pigmentation	Gene Ontology	GO:0043473	2	19	0.159741	0.553478	EDNRB|TH	http://amigo.geneontology.org/amigo/term/GO:0043473
regulation of neutrophil apoptotic process	Gene Ontology	GO:0033029	2	19	0.159741	0.553478	ANXA1|HCAR2	http://amigo.geneontology.org/amigo/term/GO:0033029
protein localization to cell periphery	Gene Ontology	GO:1990778	2	19	0.159741	0.553478	RAMP1|RAB26	http://amigo.geneontology.org/amigo/term/GO:1990778
nuclear membrane	Gene Ontology	GO:0031965	4	58	0.161193	0.558074	SLC16A3|SYNE3|INA|HPN	http://amigo.geneontology.org/amigo/term/GO:0031965
inner ear morphogenesis	Gene Ontology	GO:0042472	6	103	0.169193	0.579497	CLIC5|COL11A1|SPRY2|LHFPL5|DLX5|DLX6	http://amigo.geneontology.org/amigo/term/GO:0042472
regulation of catalytic activity	Gene Ontology	GO:0050790	42	1012	0.170546	0.579497	ELANE|MAD2L1|LCN1|CCL7|APOA2|PCOLCE2|FABP4|EDNRB|ITIH5|DEPDC1B|ADIPOQ|LHCGR|PREX2|SERPINA9|CST9L|ZP4|CST9|RELN|PPP1R12B|PTTG1|TERT|RGS8|PPP1R14A|KISS1R|NPR3|CST1|CENPE|CARD17|GCGR|FGF5|ELFN2|SFRP1|PFKFB1|PI16|PSAPL1|KIT|A2ML1|MT3|GNAL|CAMK2N2|CST5|PAK3	http://amigo.geneontology.org/amigo/term/GO:0050790
negative regulation of reactive oxygen species metabolic process	Gene Ontology	GO:2000378	2	20	0.171951	0.579497	MMP3|CAV1	http://amigo.geneontology.org/amigo/term/GO:2000378
mesangial cell differentiation	Gene Ontology	GO:0072007	2	20	0.171951	0.579497	HN1|CD34	http://amigo.geneontology.org/amigo/term/GO:0072007
cellular modified amino acid catabolic process	Gene Ontology	GO:0042219	2	20	0.171951	0.579497	ALDH1L1|DMGDH	http://amigo.geneontology.org/amigo/term/GO:0042219
positive regulation of organ growth	Gene Ontology	GO:0046622	2	20	0.171951	0.579497	WT1|CDK1	http://amigo.geneontology.org/amigo/term/GO:0046622
regulation of histone methylation	Gene Ontology	GO:0031060	2	20	0.171951	0.579497	PAX7|DMRTC2	http://amigo.geneontology.org/amigo/term/GO:0031060
amino acid transmembrane transport	Gene Ontology	GO:0003333	2	20	0.171951	0.579497	ATP1A2|SLC7A3	http://amigo.geneontology.org/amigo/term/GO:0003333
calcium-independent cell-cell adhesion via plasma membrane cell-adhesion molecules	Gene Ontology	GO:0016338	2	20	0.171951	0.579497	CLDN9|CLDN11	http://amigo.geneontology.org/amigo/term/GO:0016338
midbody	Gene Ontology	GO:0030496	2	20	0.171951	0.579497	PLK1|NEK2	http://amigo.geneontology.org/amigo/term/GO:0030496
organic anion transmembrane transporter activity	Gene Ontology	GO:0008514	2	20	0.171951	0.579497	SLCO5A1|SLC1A6	http://amigo.geneontology.org/amigo/term/GO:0008514
trabecula morphogenesis	Gene Ontology	GO:0061383	2	20	0.171951	0.579497	NKX2-5|COL1A1	http://amigo.geneontology.org/amigo/term/GO:0061383
negative regulation of proteolysis	Gene Ontology	GO:0045861	3	39	0.171998	0.579497	CST2|SERPINA9|DPEP1	http://amigo.geneontology.org/amigo/term/GO:0045861
multicellular organismal homeostasis	Gene Ontology	GO:0048871	4	60	0.174507	0.579497	TP63|CD34|TFF1|COL2A1	http://amigo.geneontology.org/amigo/term/GO:0048871
protein acylation	Gene Ontology	GO:0043543	3	40	0.180528	0.579497	ESCO2|PER1|MYOCD	http://amigo.geneontology.org/amigo/term/GO:0043543
spindle	Gene Ontology	GO:0005819	3	40	0.180528	0.579497	GSG2|SPAG5|BUB1B	http://amigo.geneontology.org/amigo/term/GO:0005819
response to vitamin	Gene Ontology	GO:0033273	3	40	0.180528	0.579497	COL1A1|OTC|CAT	http://amigo.geneontology.org/amigo/term/GO:0033273
iron ion homeostasis	Gene Ontology	GO:0055072	3	40	0.180528	0.579497	ALAS2|TFR2|TMPRSS6	http://amigo.geneontology.org/amigo/term/GO:0055072
peptidyl-tyrosine dephosphorylation	Gene Ontology	GO:0035335	2	21	0.184305	0.579497	CDC25A|DUSP13	http://amigo.geneontology.org/amigo/term/GO:0035335
positive regulation of establishment of protein localization to mitochondrion	Gene Ontology	GO:1903749	2	21	0.184305	0.579497	NRG1|LRRC46	http://amigo.geneontology.org/amigo/term/GO:1903749
serine-type endopeptidase inhibitor activity	Gene Ontology	GO:0004867	2	21	0.184305	0.579497	SERPINA12|PCSK1N	http://amigo.geneontology.org/amigo/term/GO:0004867
response to vitamin D	Gene Ontology	GO:0033280	2	21	0.184305	0.579497	SFRP1|ADAMTS1	http://amigo.geneontology.org/amigo/term/GO:0033280
regulation of peptidyl-serine phosphorylation	Gene Ontology	GO:0033135	2	21	0.184305	0.579497	DKK1|IFNB1	http://amigo.geneontology.org/amigo/term/GO:0033135
positive regulation of phosphatidylinositol 3-kinase signaling	Gene Ontology	GO:0014068	2	21	0.184305	0.579497	LEP|RELN	http://amigo.geneontology.org/amigo/term/GO:0014068
positive regulation of viral process	Gene Ontology	GO:0048524	2	21	0.184305	0.579497	HN1|TOP2A	http://amigo.geneontology.org/amigo/term/GO:0048524
negative regulation of cell morphogenesis involved in differentiation	Gene Ontology	GO:0010771	2	21	0.184305	0.579497	LINGO1|TNR	http://amigo.geneontology.org/amigo/term/GO:0010771
phosphatidylinositol biosynthetic process	Gene Ontology	GO:0006661	2	21	0.184305	0.579497	CFD|FGF2	http://amigo.geneontology.org/amigo/term/GO:0006661
chemoattractant activity	Gene Ontology	GO:0042056	1	5	0.188026	0.579497	CCL16	http://amigo.geneontology.org/amigo/term/GO:0042056
tumor necrosis factor receptor binding	Gene Ontology	GO:0005164	1	5	0.188026	0.579497	DTL	http://amigo.geneontology.org/amigo/term/GO:0005164
peroxiredoxin activity	Gene Ontology	GO:0051920	1	5	0.188026	0.579497	TDPX2	http://amigo.geneontology.org/amigo/term/GO:0051920
adenylate cyclase activity	Gene Ontology	GO:0004016	1	5	0.188026	0.579497	EDNRB	http://amigo.geneontology.org/amigo/term/GO:0004016
metanephric glomerulus vasculature development	Gene Ontology	GO:0072239	1	5	0.188026	0.579497	CD34	http://amigo.geneontology.org/amigo/term/GO:0072239
dystrophin-associated glycoprotein complex	Gene Ontology	GO:0016010	1	5	0.188026	0.579497	CAV3	http://amigo.geneontology.org/amigo/term/GO:0016010
regulation of polysaccharide biosynthetic process	Gene Ontology	GO:0032885	1	5	0.188026	0.579497	IGF1	http://amigo.geneontology.org/amigo/term/GO:0032885
protein localization to microtubule organizing center	Gene Ontology	GO:1905508	1	5	0.188026	0.579497	AURKA	http://amigo.geneontology.org/amigo/term/GO:1905508
response to diuretic	Gene Ontology	GO:0036270	1	5	0.188026	0.579497	IGF1	http://amigo.geneontology.org/amigo/term/GO:0036270
isoprenoid binding	Gene Ontology	GO:0019840	1	5	0.188026	0.579497	LCN12	http://amigo.geneontology.org/amigo/term/GO:0019840
penile erection	Gene Ontology	GO:0043084	1	5	0.188026	0.579497	OXTR	http://amigo.geneontology.org/amigo/term/GO:0043084
mRNA transcription	Gene Ontology	GO:0009299	1	5	0.188026	0.579497	SOX17	http://amigo.geneontology.org/amigo/term/GO:0009299
regulation of myelination	Gene Ontology	GO:0031641	1	5	0.188026	0.579497	NRG1	http://amigo.geneontology.org/amigo/term/GO:0031641
phosphatidylcholine acyl-chain remodeling	Gene Ontology	GO:0036151	1	5	0.188026	0.579497	PLA2G4D	http://amigo.geneontology.org/amigo/term/GO:0036151
androgen catabolic process	Gene Ontology	GO:0006710	1	5	0.188026	0.579497	HSD17B6	http://amigo.geneontology.org/amigo/term/GO:0006710
negative regulation of mitotic sister chromatid segregation	Gene Ontology	GO:0033048	1	5	0.188026	0.579497	CCNB1	http://amigo.geneontology.org/amigo/term/GO:0033048
negative regulation of protein localization to cell periphery	Gene Ontology	GO:1904376	1	5	0.188026	0.579497	PKDCC	http://amigo.geneontology.org/amigo/term/GO:1904376
retinoid X receptor binding	Gene Ontology	GO:0046965	1	5	0.188026	0.579497	PPARG	http://amigo.geneontology.org/amigo/term/GO:0046965
peptidyl-lysine trimethylation	Gene Ontology	GO:0018023	1	5	0.188026	0.579497	DMRTC2	http://amigo.geneontology.org/amigo/term/GO:0018023
aldosterone metabolic process	Gene Ontology	GO:0032341	1	5	0.188026	0.579497	CACNA1H	http://amigo.geneontology.org/amigo/term/GO:0032341
regulation of actin nucleation	Gene Ontology	GO:0051125	1	5	0.188026	0.579497	VIL1	http://amigo.geneontology.org/amigo/term/GO:0051125
phosphatidylcholine biosynthetic process	Gene Ontology	GO:0006656	1	5	0.188026	0.579497	APOA2	http://amigo.geneontology.org/amigo/term/GO:0006656
insulin receptor binding	Gene Ontology	GO:0005158	1	5	0.188026	0.579497	IGF1	http://amigo.geneontology.org/amigo/term/GO:0005158
renal absorption	Gene Ontology	GO:0070293	1	5	0.188026	0.579497	ADIPOQ	http://amigo.geneontology.org/amigo/term/GO:0070293
positive regulation of macrophage activation	Gene Ontology	GO:0043032	1	5	0.188026	0.579497	IL33	http://amigo.geneontology.org/amigo/term/GO:0043032
S-acyltransferase activity	Gene Ontology	GO:0016417	1	5	0.188026	0.579497	ZDHHC22	http://amigo.geneontology.org/amigo/term/GO:0016417
negative regulation of smooth muscle contraction	Gene Ontology	GO:0045986	1	5	0.188026	0.579497	ADRB2	http://amigo.geneontology.org/amigo/term/GO:0045986
regulation of pri-miRNA transcription by RNA polymerase II	Gene Ontology	GO:1902893	1	5	0.188026	0.579497	FOS	http://amigo.geneontology.org/amigo/term/GO:1902893
negative regulation of activated T cell proliferation	Gene Ontology	GO:0046007	1	5	0.188026	0.579497	FOXP3	http://amigo.geneontology.org/amigo/term/GO:0046007
neurotransmitter:sodium symporter activity	Gene Ontology	GO:0005328	1	5	0.188026	0.579497	SLC1A1	http://amigo.geneontology.org/amigo/term/GO:0005328
negative regulation of cytokine secretion involved in immune response	Gene Ontology	GO:0002740	1	5	0.188026	0.579497	APOA1	http://amigo.geneontology.org/amigo/term/GO:0002740
negative regulation of cellular response to oxidative stress	Gene Ontology	GO:1900408	1	5	0.188026	0.579497	NR4A3	http://amigo.geneontology.org/amigo/term/GO:1900408
post-embryonic camera-type eye development	Gene Ontology	GO:0031077	1	5	0.188026	0.579497	KLF4	http://amigo.geneontology.org/amigo/term/GO:0031077
non-membrane spanning protein tyrosine kinase activity	Gene Ontology	GO:0004715	1	5	0.188026	0.579497	BMX	http://amigo.geneontology.org/amigo/term/GO:0004715
positive regulation of protein insertion into mitochondrial membrane involved in apoptotic signaling pathway	Gene Ontology	GO:1900740	1	5	0.188026	0.579497	E2F1	http://amigo.geneontology.org/amigo/term/GO:1900740
citrate metabolic process	Gene Ontology	GO:0006101	1	5	0.188026	0.579497	ACO1	http://amigo.geneontology.org/amigo/term/GO:0006101
positive regulation of receptor internalization	Gene Ontology	GO:0002092	1	5	0.188026	0.579497	ANGPT1	http://amigo.geneontology.org/amigo/term/GO:0002092
secondary alcohol biosynthetic process	Gene Ontology	GO:1902653	1	5	0.188026	0.579497	APOA1	http://amigo.geneontology.org/amigo/term/GO:1902653
miRNA binding	Gene Ontology	GO:0035198	1	5	0.188026	0.579497	LIN28A	http://amigo.geneontology.org/amigo/term/GO:0035198
endothelial cell chemotaxis	Gene Ontology	GO:0035767	1	5	0.188026	0.579497	FGF4	http://amigo.geneontology.org/amigo/term/GO:0035767
RNA stabilization	Gene Ontology	GO:0043489	1	5	0.188026	0.579497	APOBEC1	http://amigo.geneontology.org/amigo/term/GO:0043489
adenylate cyclase-activating adrenergic receptor signaling pathway	Gene Ontology	GO:0071880	1	5	0.188026	0.579497	ADRB3	http://amigo.geneontology.org/amigo/term/GO:0071880
glycoprotein complex	Gene Ontology	GO:0090665	1	5	0.188026	0.579497	PGM5	http://amigo.geneontology.org/amigo/term/GO:0090665
L-amino acid transmembrane transporter activity	Gene Ontology	GO:0015179	1	5	0.188026	0.579497	SLC7A3	http://amigo.geneontology.org/amigo/term/GO:0015179
positive regulation of antigen processing and presentation of peptide antigen	Gene Ontology	GO:0002585	1	5	0.188026	0.579497	ABCB1	http://amigo.geneontology.org/amigo/term/GO:0002585
beta-1,3-galactosyltransferase activity	Gene Ontology	GO:0048531	1	5	0.188026	0.579497	B3GALT1	http://amigo.geneontology.org/amigo/term/GO:0048531
Purkinje myocyte differentiation	Gene Ontology	GO:0003168	1	5	0.188026	0.579497	NKX2-5	http://amigo.geneontology.org/amigo/term/GO:0003168
deltoid tuberosity development	Gene Ontology	GO:0035993	1	5	0.188026	0.579497	SCX	http://amigo.geneontology.org/amigo/term/GO:0035993
regulation of inner ear receptor cell differentiation	Gene Ontology	GO:2000980	1	5	0.188026	0.579497	HN1	http://amigo.geneontology.org/amigo/term/GO:2000980
neutrophil mediated killing of symbiont cell	Gene Ontology	GO:0070943	1	5	0.188026	0.579497	ELANE	http://amigo.geneontology.org/amigo/term/GO:0070943
negative regulation of megakaryocyte differentiation	Gene Ontology	GO:0045653	1	5	0.188026	0.579497	HIST1H4J	http://amigo.geneontology.org/amigo/term/GO:0045653
sarcoplasm	Gene Ontology	GO:0016528	1	5	0.188026	0.579497	RYR3	http://amigo.geneontology.org/amigo/term/GO:0016528
protein serine/threonine kinase inhibitor activity	Gene Ontology	GO:0030291	1	5	0.188026	0.579497	PRKAR2B	http://amigo.geneontology.org/amigo/term/GO:0030291
norepinephrine transport	Gene Ontology	GO:0015874	1	5	0.188026	0.579497	OXTR	http://amigo.geneontology.org/amigo/term/GO:0015874
deoxyribonucleoside triphosphate metabolic process	Gene Ontology	GO:0009200	1	5	0.188026	0.579497	TYMS	http://amigo.geneontology.org/amigo/term/GO:0009200
negative regulation of lipid localization	Gene Ontology	GO:1905953	1	5	0.188026	0.579497	APOC3	http://amigo.geneontology.org/amigo/term/GO:1905953
regulation of oxidative phosphorylation	Gene Ontology	GO:0002082	1	5	0.188026	0.579497	MLXIPL	http://amigo.geneontology.org/amigo/term/GO:0002082
regulation of histone H4 acetylation	Gene Ontology	GO:0090239	1	5	0.188026	0.579497	MUC1	http://amigo.geneontology.org/amigo/term/GO:0090239
regulation of mitotic sister chromatid separation	Gene Ontology	GO:0010965	1	5	0.188026	0.579497	BUB1	http://amigo.geneontology.org/amigo/term/GO:0010965
positive regulation of telomerase activity	Gene Ontology	GO:0051973	1	5	0.188026	0.579497	KLF4	http://amigo.geneontology.org/amigo/term/GO:0051973
cell proliferation in hindbrain	Gene Ontology	GO:0021534	1	5	0.188026	0.579497	FGF2	http://amigo.geneontology.org/amigo/term/GO:0021534
response to corticotropin-releasing hormone	Gene Ontology	GO:0043435	1	5	0.188026	0.579497	NR4A3	http://amigo.geneontology.org/amigo/term/GO:0043435
cellular response to glucose starvation	Gene Ontology	GO:0042149	1	5	0.188026	0.579497	NUAK2	http://amigo.geneontology.org/amigo/term/GO:0042149
cell-cell adherens junction	Gene Ontology	GO:0005913	1	5	0.188026	0.579497	FAT2	http://amigo.geneontology.org/amigo/term/GO:0005913
site of DNA damage	Gene Ontology	GO:0090734	1	5	0.188026	0.579497	ESCO2	http://amigo.geneontology.org/amigo/term/GO:0090734
negative regulation of heart contraction	Gene Ontology	GO:0045822	1	5	0.188026	0.579497	SPX	http://amigo.geneontology.org/amigo/term/GO:0045822
Wnt-protein binding	Gene Ontology	GO:0017147	1	5	0.188026	0.579497	FZD4	http://amigo.geneontology.org/amigo/term/GO:0017147
negative regulation of cardiac muscle tissue development	Gene Ontology	GO:0055026	1	5	0.188026	0.579497	TGFBR2	http://amigo.geneontology.org/amigo/term/GO:0055026
peroxidase activity	Gene Ontology	GO:0004601	1	5	0.188026	0.579497	CAT	http://amigo.geneontology.org/amigo/term/GO:0004601
positive regulation by host of viral transcription	Gene Ontology	GO:0043923	1	5	0.188026	0.579497	LEF1	http://amigo.geneontology.org/amigo/term/GO:0043923
protein ADP-ribosylation	Gene Ontology	GO:0006471	1	5	0.188026	0.579497	ART3	http://amigo.geneontology.org/amigo/term/GO:0006471
primary amino compound metabolic process	Gene Ontology	GO:1901160	1	5	0.188026	0.579497	MAOA	http://amigo.geneontology.org/amigo/term/GO:1901160
presynapse organization	Gene Ontology	GO:0099172	1	5	0.188026	0.579497	NLGN1	http://amigo.geneontology.org/amigo/term/GO:0099172
hydrolase activity, acting on carbon-nitrogen (but not peptide) bonds, in linear amidines	Gene Ontology	GO:0016813	1	5	0.188026	0.579497	PADI3	http://amigo.geneontology.org/amigo/term/GO:0016813
noradrenergic neuron differentiation	Gene Ontology	GO:0003357	1	5	0.188026	0.579497	INSM1	http://amigo.geneontology.org/amigo/term/GO:0003357
phenol-containing compound biosynthetic process	Gene Ontology	GO:0046189	1	5	0.188026	0.579497	TH	http://amigo.geneontology.org/amigo/term/GO:0046189
regulation of keratinocyte proliferation	Gene Ontology	GO:0010837	1	5	0.188026	0.579497	TP63	http://amigo.geneontology.org/amigo/term/GO:0010837
positive regulation of protein import	Gene Ontology	GO:1904591	1	5	0.188026	0.579497	ZIC1	http://amigo.geneontology.org/amigo/term/GO:1904591
ovulation	Gene Ontology	GO:0030728	1	5	0.188026	0.579497	INHBA	http://amigo.geneontology.org/amigo/term/GO:0030728
regulation of pseudopodium assembly	Gene Ontology	GO:0031272	1	5	0.188026	0.579497	KIT	http://amigo.geneontology.org/amigo/term/GO:0031272
morphogenesis of an epithelial fold	Gene Ontology	GO:0060571	1	5	0.188026	0.579497	TP63	http://amigo.geneontology.org/amigo/term/GO:0060571
methyl-CpG binding	Gene Ontology	GO:0008327	1	5	0.188026	0.579497	UHRF1	http://amigo.geneontology.org/amigo/term/GO:0008327
anatomical structure arrangement	Gene Ontology	GO:0048532	1	5	0.188026	0.579497	EGR2	http://amigo.geneontology.org/amigo/term/GO:0048532
negative regulation of response to drug	Gene Ontology	GO:2001024	1	5	0.188026	0.579497	NR4A3	http://amigo.geneontology.org/amigo/term/GO:2001024
chondrocyte development	Gene Ontology	GO:0002063	1	5	0.188026	0.579497	BMPR1B	http://amigo.geneontology.org/amigo/term/GO:0002063
regulation of fibroblast growth factor receptor signaling pathway	Gene Ontology	GO:0040036	1	5	0.188026	0.579497	SPRY2	http://amigo.geneontology.org/amigo/term/GO:0040036
negative regulation of oxidoreductase activity	Gene Ontology	GO:0051354	1	5	0.188026	0.579497	CAV1	http://amigo.geneontology.org/amigo/term/GO:0051354
isotype switching to IgE isotypes	Gene Ontology	GO:0048289	1	5	0.188026	0.579497	FOXP3	http://amigo.geneontology.org/amigo/term/GO:0048289
neuropeptide hormone activity	Gene Ontology	GO:0005184	1	5	0.188026	0.579497	GAL	http://amigo.geneontology.org/amigo/term/GO:0005184
regulation of protein kinase C signaling	Gene Ontology	GO:0090036	1	5	0.188026	0.579497	SEZ6L	http://amigo.geneontology.org/amigo/term/GO:0090036
cyclic nucleotide binding	Gene Ontology	GO:0030551	1	5	0.188026	0.579497	PRKAR2B	http://amigo.geneontology.org/amigo/term/GO:0030551
neuronal stem cell division	Gene Ontology	GO:0036445	1	5	0.188026	0.579497	DCT	http://amigo.geneontology.org/amigo/term/GO:0036445
positive regulation of fatty acid oxidation	Gene Ontology	GO:0046321	1	5	0.188026	0.579497	ABCD2	http://amigo.geneontology.org/amigo/term/GO:0046321
cAMP-dependent protein kinase regulator activity	Gene Ontology	GO:0008603	1	5	0.188026	0.579497	PRKAR2B	http://amigo.geneontology.org/amigo/term/GO:0008603
arachidonic acid secretion	Gene Ontology	GO:0050482	1	5	0.188026	0.579497	ANXA1	http://amigo.geneontology.org/amigo/term/GO:0050482
negative regulation of protein maturation	Gene Ontology	GO:1903318	1	5	0.188026	0.579497	BIRC5	http://amigo.geneontology.org/amigo/term/GO:1903318
metanephric capsule formation	Gene Ontology	GO:0072266	1	5	0.188026	0.579497	FOXD1	http://amigo.geneontology.org/amigo/term/GO:0072266
negative regulation of protein import into nucleus	Gene Ontology	GO:0042308	1	5	0.188026	0.579497	ANGPT1	http://amigo.geneontology.org/amigo/term/GO:0042308
regulation of mesonephros development	Gene Ontology	GO:0061217	1	5	0.188026	0.579497	WT1	http://amigo.geneontology.org/amigo/term/GO:0061217
regulation of sensory perception of pain	Gene Ontology	GO:0051930	1	5	0.188026	0.579497	MGLL	http://amigo.geneontology.org/amigo/term/GO:0051930
cGMP-mediated signaling	Gene Ontology	GO:0019934	1	5	0.188026	0.579497	PDE2A	http://amigo.geneontology.org/amigo/term/GO:0019934
cation-transporting ATPase complex	Gene Ontology	GO:0090533	1	5	0.188026	0.579497	FXYD1	http://amigo.geneontology.org/amigo/term/GO:0090533
positive regulation of cell proliferation involved in kidney development	Gene Ontology	GO:1901724	1	5	0.188026	0.579497	LIN28A	http://amigo.geneontology.org/amigo/term/GO:1901724
death receptor activity	Gene Ontology	GO:0005035	1	5	0.188026	0.579497	TNFRSF9	http://amigo.geneontology.org/amigo/term/GO:0005035
antifungal humoral response	Gene Ontology	GO:0019732	1	5	0.188026	0.579497	IL36RN	http://amigo.geneontology.org/amigo/term/GO:0019732
negative regulation of sister chromatid segregation	Gene Ontology	GO:0033046	1	5	0.188026	0.579497	USP44	http://amigo.geneontology.org/amigo/term/GO:0033046
negative regulation of glomerular filtration	Gene Ontology	GO:0003105	1	5	0.188026	0.579497	UTS2	http://amigo.geneontology.org/amigo/term/GO:0003105
centriolar satellite	Gene Ontology	GO:0034451	1	5	0.188026	0.579497	ZMYND10	http://amigo.geneontology.org/amigo/term/GO:0034451
negative regulation of RNA catabolic process	Gene Ontology	GO:1902369	1	5	0.188026	0.579497	APOBEC1	http://amigo.geneontology.org/amigo/term/GO:1902369
retinoid binding	Gene Ontology	GO:0005501	1	5	0.188026	0.579497	ALDH1A2	http://amigo.geneontology.org/amigo/term/GO:0005501
regulation of timing of neuron differentiation	Gene Ontology	GO:0060164	1	5	0.188026	0.579497	ASCL1	http://amigo.geneontology.org/amigo/term/GO:0060164
aggressive behavior	Gene Ontology	GO:0002118	1	5	0.188026	0.579497	TACR1	http://amigo.geneontology.org/amigo/term/GO:0002118
positive regulation of T-helper 2 cell differentiation	Gene Ontology	GO:0045630	1	5	0.188026	0.579497	IL6	http://amigo.geneontology.org/amigo/term/GO:0045630
mast cell chemotaxis	Gene Ontology	GO:0002551	1	5	0.188026	0.579497	CCL11	http://amigo.geneontology.org/amigo/term/GO:0002551
decidualization	Gene Ontology	GO:0046697	1	5	0.188026	0.579497	GJB2	http://amigo.geneontology.org/amigo/term/GO:0046697
peptidyl-threonine dephosphorylation	Gene Ontology	GO:0035970	1	5	0.188026	0.579497	PPM1E	http://amigo.geneontology.org/amigo/term/GO:0035970
ammonium transmembrane transport	Gene Ontology	GO:0072488	1	5	0.188026	0.579497	SLC6A4	http://amigo.geneontology.org/amigo/term/GO:0072488
regulation of sprouting angiogenesis	Gene Ontology	GO:1903670	1	5	0.188026	0.579497	KLF4	http://amigo.geneontology.org/amigo/term/GO:1903670
enteric nervous system development	Gene Ontology	GO:0048484	1	5	0.188026	0.579497	EDNRB	http://amigo.geneontology.org/amigo/term/GO:0048484
cellular response to prostaglandin E stimulus	Gene Ontology	GO:0071380	1	5	0.188026	0.579497	FN1	http://amigo.geneontology.org/amigo/term/GO:0071380
DNA ligation	Gene Ontology	GO:0006266	1	5	0.188026	0.579497	TOP2A	http://amigo.geneontology.org/amigo/term/GO:0006266
regulation of epidermal cell differentiation	Gene Ontology	GO:0045604	1	5	0.188026	0.579497	EZH2	http://amigo.geneontology.org/amigo/term/GO:0045604
protein tyrosine kinase binding	Gene Ontology	GO:1990782	1	5	0.188026	0.579497	NTRK2	http://amigo.geneontology.org/amigo/term/GO:1990782
pulmonary vein morphogenesis	Gene Ontology	GO:0060577	1	5	0.188026	0.579497	TBX20	http://amigo.geneontology.org/amigo/term/GO:0060577
positive regulation of epithelial cell proliferation	Gene Ontology	GO:0050679	4	62	0.188181	0.579572	IL6|PTN|BMP2|PROX1	http://amigo.geneontology.org/amigo/term/GO:0050679
synaptic membrane	Gene Ontology	GO:0097060	3	41	0.189169	0.58221	GABRD|SHISA9|GABRA3	http://amigo.geneontology.org/amigo/term/GO:0097060
heterocycle biosynthetic process	Gene Ontology	GO:0018130	66	1664	0.19055	0.586054	HMX2|DTX1|ELAVL2|HMGB3|ONECUT2|FOSB|ZNF695|RUNDC3A|HIST1H2AL|BMPR1B|ISX|HN1|TP63|HIST1H2AG|HOXA2|HIST2H4A|LEP|LHX3|CCNA2|DMRTA2|FEZF2|PRAME|BRIP1|S1PR1|CCNE1|CDT1|SOHLH1|SOX17|SIM2|ISG15|RELN|DLX4|ZIC2|EBF3|ZIC3|TFR2|IGF1|S100A8|FOS|HOXB1|CHRDL1|ASCL4|ORC1|PPARG|TCEAL7|DDN|MYH6|CENPU|FGF4|CIDEC|ARNT2|NKX6-1|ETV7|RCOR2|DDR2|MAEL|IL6|CDK1|ADRB2|CREB3L1|PDK4|OTP|PDX1|PAK3|HES6|MCIDAS	http://amigo.geneontology.org/amigo/term/GO:0018130
ameboidal-type cell migration	Gene Ontology	GO:0001667	8	155	0.194695	0.597559	FAT2|ANLN|HN1|MAST1|KLF4|LEF1|FGF4|APOA1	http://amigo.geneontology.org/amigo/term/GO:0001667
cell junction organization	Gene Ontology	GO:0034330	4	63	0.195143	0.598105	MYOC|ACTN2|ANK2|COL17A1	http://amigo.geneontology.org/amigo/term/GO:0034330
negative regulation of transmembrane receptor protein serine/threonine kinase signaling pathway	Gene Ontology	GO:0090101	2	22	0.196781	0.60105	TBX20|TMPRSS6	http://amigo.geneontology.org/amigo/term/GO:0090101
response to heat	Gene Ontology	GO:0009408	2	22	0.196781	0.60105	IL6|CXCL10	http://amigo.geneontology.org/amigo/term/GO:0009408
execution phase of apoptosis	Gene Ontology	GO:0097194	2	22	0.196781	0.60105	PTGIS|CLSPN	http://amigo.geneontology.org/amigo/term/GO:0097194
regulation of biomineral tissue development	Gene Ontology	GO:0070167	2	22	0.196781	0.60105	NELL1|FBN2	http://amigo.geneontology.org/amigo/term/GO:0070167
regulation of protein binding	Gene Ontology	GO:0043393	2	22	0.196781	0.60105	CTHRC1|CAV1	http://amigo.geneontology.org/amigo/term/GO:0043393
protein phosphorylation	Gene Ontology	GO:0006468	34	818	0.197255	0.602083	CEMIP|MAPK8IP2|CLSPN|BGN|KIF14|FABP4|MYOC|ADIPOQ|CAV1|IFNL1|FZD4|CCNE1|KLF4|HTR2A|AURKA|CCL20|RAX|TGFBR2|CDKN2A|LIPE|GRIN2D|GSG2|KCNH1|FGF5|FGF1|BMP3|GRIN2B|MYLK|LEP|ANGPT4|SPTBN1|GFRA2|CAMK2N2|FGF21	http://amigo.geneontology.org/amigo/term/GO:0006468
endoderm formation	Gene Ontology	GO:0001706	3	42	0.197913	0.603262	TBX20|FN1|ITGA7	http://amigo.geneontology.org/amigo/term/GO:0001706
receptor internalization	Gene Ontology	GO:0031623	3	42	0.197913	0.603262	CAV3|CD36|CAV1	http://amigo.geneontology.org/amigo/term/GO:0031623
active transmembrane transporter activity	Gene Ontology	GO:0022804	4	64	0.202183	0.611354	SLC1A1|SLC16A6|SLC36A2|SLC7A13	http://amigo.geneontology.org/amigo/term/GO:0022804
multi-multicellular organism process	Gene Ontology	GO:0044706	4	65	0.209296	0.611354	TGFBR2|ADRB2|MUC1|CRHBP	http://amigo.geneontology.org/amigo/term/GO:0044706
positive regulation of establishment of protein localization	Gene Ontology	GO:1904951	4	65	0.209296	0.611354	IL6|CLEC5A|GTSE1|LRRC46	http://amigo.geneontology.org/amigo/term/GO:1904951
response to organophosphorus	Gene Ontology	GO:0046683	4	65	0.209296	0.611354	COL1A1|FOSB|HCN2|FOS	http://amigo.geneontology.org/amigo/term/GO:0046683
positive regulation of striated muscle tissue development	Gene Ontology	GO:0045844	4	65	0.209296	0.611354	TBX20|CCNB1|ADRB2|FGF2	http://amigo.geneontology.org/amigo/term/GO:0045844
core promoter binding	Gene Ontology	GO:0001047	2	23	0.209356	0.611354	FOXP3|PROX1	http://amigo.geneontology.org/amigo/term/GO:0001047
negative regulation of protein depolymerization	Gene Ontology	GO:1901880	2	23	0.209356	0.611354	CAPZA3|VIL1	http://amigo.geneontology.org/amigo/term/GO:1901880
plasma membrane bounded cell projection cytoplasm	Gene Ontology	GO:0032838	2	23	0.209356	0.611354	GNAT3|MGARP	http://amigo.geneontology.org/amigo/term/GO:0032838
iron ion binding	Gene Ontology	GO:0005506	2	23	0.209356	0.611354	CYP3A4|HBA2	http://amigo.geneontology.org/amigo/term/GO:0005506
positive regulation of cellular protein catabolic process	Gene Ontology	GO:1903364	2	23	0.209356	0.611354	CEBPA|AURKA	http://amigo.geneontology.org/amigo/term/GO:1903364
peptidyl-threonine phosphorylation	Gene Ontology	GO:0018107	2	23	0.209356	0.611354	PLK1|MYLK2	http://amigo.geneontology.org/amigo/term/GO:0018107
positive regulation of angiogenesis	Gene Ontology	GO:0045766	5	88	0.211878	0.611354	LRG1|TGFBR2|CMA1|CCL24|PTGIS	http://amigo.geneontology.org/amigo/term/GO:0045766
protein-containing complex subunit organization	Gene Ontology	GO:0043933	18	410	0.214307	0.611354	TGFBR3|ACTN2|HIST1H4A|CETP|NLGN1|HIST1H1T|CENPF|PYDC1|HIST1H1A|HIST1H2BD|HIST1H2BF|HIST2H2BE|HIST1H2BC|NRG1|KCNB1|HIST1H3I|APOA1|HIST1H1C	http://amigo.geneontology.org/amigo/term/GO:0043933
cellular component disassembly	Gene Ontology	GO:0022411	9	184	0.21528	0.611354	CAPZA3|MMP13|MYLK|ADRB2|LPL|GABRA5|MMP1|CLGN|TOP2A	http://amigo.geneontology.org/amigo/term/GO:0022411
amide binding	Gene Ontology	GO:0033218	3	44	0.215678	0.611354	SLC7A5|CEMIP|OPRD1	http://amigo.geneontology.org/amigo/term/GO:0033218
active ion transmembrane transporter activity	Gene Ontology	GO:0022853	3	44	0.215678	0.611354	SLC22A24|SLC24A2|SLCO1C1	http://amigo.geneontology.org/amigo/term/GO:0022853
response to estrogen	Gene Ontology	GO:0043627	3	44	0.215678	0.611354	PPARG|SFRP1|APOA2	http://amigo.geneontology.org/amigo/term/GO:0043627
protein acetylation	Gene Ontology	GO:0006473	3	44	0.215678	0.611354	NAT16|PER1|KLF15	http://amigo.geneontology.org/amigo/term/GO:0006473
DNA-templated transcription, initiation	Gene Ontology	GO:0006352	3	44	0.215678	0.611354	HN1|NR3C2|NKX2-5	http://amigo.geneontology.org/amigo/term/GO:0006352
olfactory bulb development	Gene Ontology	GO:0021772	1	6	0.215731	0.611354	FEZF1	http://amigo.geneontology.org/amigo/term/GO:0021772
regulation of polysaccharide metabolic process	Gene Ontology	GO:0032881	1	6	0.215731	0.611354	GCGR	http://amigo.geneontology.org/amigo/term/GO:0032881
regulation of ventricular cardiac muscle cell membrane depolarization	Gene Ontology	GO:0060373	1	6	0.215731	0.611354	SCN5A	http://amigo.geneontology.org/amigo/term/GO:0060373
desmosome	Gene Ontology	GO:0030057	1	6	0.215731	0.611354	CDSN	http://amigo.geneontology.org/amigo/term/GO:0030057
membrane depolarization during SA node cell action potential	Gene Ontology	GO:0086046	1	6	0.215731	0.611354	ANK2	http://amigo.geneontology.org/amigo/term/GO:0086046
negative regulation of digestive system process	Gene Ontology	GO:0060457	1	6	0.215731	0.611354	OXTR	http://amigo.geneontology.org/amigo/term/GO:0060457
glucocorticoid biosynthetic process	Gene Ontology	GO:0006704	1	6	0.215731	0.611354	HSD11B1	http://amigo.geneontology.org/amigo/term/GO:0006704
negative regulation of fat cell differentiation	Gene Ontology	GO:0045599	1	6	0.215731	0.611354	IL6	http://amigo.geneontology.org/amigo/term/GO:0045599
nucleobase-containing small molecule catabolic process	Gene Ontology	GO:0034656	1	6	0.215731	0.611354	APOBEC1	http://amigo.geneontology.org/amigo/term/GO:0034656
heme biosynthetic process	Gene Ontology	GO:0006783	1	6	0.215731	0.611354	ALAS2	http://amigo.geneontology.org/amigo/term/GO:0006783
negative regulation of renal sodium excretion	Gene Ontology	GO:0035814	1	6	0.215731	0.611354	UTS2	http://amigo.geneontology.org/amigo/term/GO:0035814
positive regulation of actin filament depolymerization	Gene Ontology	GO:0030836	1	6	0.215731	0.611354	CFL2	http://amigo.geneontology.org/amigo/term/GO:0030836
protein self-association	Gene Ontology	GO:0043621	1	6	0.215731	0.611354	TMEM190	http://amigo.geneontology.org/amigo/term/GO:0043621
cellular sodium ion homeostasis	Gene Ontology	GO:0006883	1	6	0.215731	0.611354	ATP1A2	http://amigo.geneontology.org/amigo/term/GO:0006883
negative regulation of cyclin-dependent protein kinase activity	Gene Ontology	GO:1904030	1	6	0.215731	0.611354	MYOCD	http://amigo.geneontology.org/amigo/term/GO:1904030
negative regulation of Notch signaling pathway	Gene Ontology	GO:0045746	1	6	0.215731	0.611354	MAGEA1	http://amigo.geneontology.org/amigo/term/GO:0045746
phosphatidylglycerol metabolic process	Gene Ontology	GO:0046471	1	6	0.215731	0.611354	PLA2G2F	http://amigo.geneontology.org/amigo/term/GO:0046471
sulfur compound transmembrane transporter activity	Gene Ontology	GO:1901682	1	6	0.215731	0.611354	SLC26A9	http://amigo.geneontology.org/amigo/term/GO:1901682
release of sequestered calcium ion into cytosol by endoplasmic reticulum	Gene Ontology	GO:1903514	1	6	0.215731	0.611354	ATP1A2	http://amigo.geneontology.org/amigo/term/GO:1903514
embryo implantation	Gene Ontology	GO:0007566	1	6	0.215731	0.611354	TGFBR2	http://amigo.geneontology.org/amigo/term/GO:0007566
nuclear heterochromatin	Gene Ontology	GO:0005720	1	6	0.215731	0.611354	HIST1H1B	http://amigo.geneontology.org/amigo/term/GO:0005720
N-terminal protein amino acid modification	Gene Ontology	GO:0031365	1	6	0.215731	0.611354	HHATL	http://amigo.geneontology.org/amigo/term/GO:0031365
positive regulation of axonogenesis	Gene Ontology	GO:0050772	1	6	0.215731	0.611354	CRABP2	http://amigo.geneontology.org/amigo/term/GO:0050772
polyol catabolic process	Gene Ontology	GO:0046174	1	6	0.215731	0.611354	NTSR1	http://amigo.geneontology.org/amigo/term/GO:0046174
glutamate receptor binding	Gene Ontology	GO:0035254	1	6	0.215731	0.611354	SYNDIG1	http://amigo.geneontology.org/amigo/term/GO:0035254
regulation of viral release from host cell	Gene Ontology	GO:1902186	1	6	0.215731	0.611354	TRIM15	http://amigo.geneontology.org/amigo/term/GO:1902186
direct ossification	Gene Ontology	GO:0036072	1	6	0.215731	0.611354	COL1A1	http://amigo.geneontology.org/amigo/term/GO:0036072
calcium activated cation channel activity	Gene Ontology	GO:0005227	1	6	0.215731	0.611354	TRPM3	http://amigo.geneontology.org/amigo/term/GO:0005227
response to nitric oxide	Gene Ontology	GO:0071731	1	6	0.215731	0.611354	DPEP1	http://amigo.geneontology.org/amigo/term/GO:0071731
endodermal cell fate commitment	Gene Ontology	GO:0001711	1	6	0.215731	0.611354	SOX2	http://amigo.geneontology.org/amigo/term/GO:0001711
organelle inheritance	Gene Ontology	GO:0048308	1	6	0.215731	0.611354	CDK1	http://amigo.geneontology.org/amigo/term/GO:0048308
solute:cation antiporter activity	Gene Ontology	GO:0015298	1	6	0.215731	0.611354	SLC8A2	http://amigo.geneontology.org/amigo/term/GO:0015298
semicircular canal development	Gene Ontology	GO:0060872	1	6	0.215731	0.611354	NR4A3	http://amigo.geneontology.org/amigo/term/GO:0060872
acrosomal membrane	Gene Ontology	GO:0002080	1	6	0.215731	0.611354	CAV1	http://amigo.geneontology.org/amigo/term/GO:0002080
tumor necrosis factor receptor superfamily binding	Gene Ontology	GO:0032813	1	6	0.215731	0.611354	LTB	http://amigo.geneontology.org/amigo/term/GO:0032813
positive regulation of urine volume	Gene Ontology	GO:0035810	1	6	0.215731	0.611354	NPR1	http://amigo.geneontology.org/amigo/term/GO:0035810
negative regulation of stress-activated protein kinase signaling cascade	Gene Ontology	GO:0070303	1	6	0.215731	0.611354	PER1	http://amigo.geneontology.org/amigo/term/GO:0070303
carboxy-lyase activity	Gene Ontology	GO:0016831	1	6	0.215731	0.611354	GAD1	http://amigo.geneontology.org/amigo/term/GO:0016831
negative regulation of viral entry into host cell	Gene Ontology	GO:0046597	1	6	0.215731	0.611354	GSN	http://amigo.geneontology.org/amigo/term/GO:0046597
response to potassium ion	Gene Ontology	GO:0035864	1	6	0.215731	0.611354	CACNA1H	http://amigo.geneontology.org/amigo/term/GO:0035864
positive regulation of insulin-like growth factor receptor signaling pathway	Gene Ontology	GO:0043568	1	6	0.215731	0.611354	IGF1	http://amigo.geneontology.org/amigo/term/GO:0043568
telomerase activity	Gene Ontology	GO:0003720	1	6	0.215731	0.611354	AURKB	http://amigo.geneontology.org/amigo/term/GO:0003720
phospholipid transporter activity	Gene Ontology	GO:0005548	1	6	0.215731	0.611354	APOA1	http://amigo.geneontology.org/amigo/term/GO:0005548
positive regulation of astrocyte differentiation	Gene Ontology	GO:0048711	1	6	0.215731	0.611354	HN1	http://amigo.geneontology.org/amigo/term/GO:0048711
regulation of response to extracellular stimulus	Gene Ontology	GO:0032104	1	6	0.215731	0.611354	MT3	http://amigo.geneontology.org/amigo/term/GO:0032104
response to thyroid hormone	Gene Ontology	GO:0097066	1	6	0.215731	0.611354	HPN	http://amigo.geneontology.org/amigo/term/GO:0097066
regulation of chromosome separation	Gene Ontology	GO:1905818	1	6	0.215731	0.611354	UBE2C	http://amigo.geneontology.org/amigo/term/GO:1905818
cellular response to oxygen radical	Gene Ontology	GO:0071450	1	6	0.215731	0.611354	SOD3	http://amigo.geneontology.org/amigo/term/GO:0071450
amide transmembrane transporter activity	Gene Ontology	GO:0042887	1	6	0.215731	0.611354	GPIHBP1	http://amigo.geneontology.org/amigo/term/GO:0042887
negative regulation of protein acetylation	Gene Ontology	GO:1901984	1	6	0.215731	0.611354	FOXP3	http://amigo.geneontology.org/amigo/term/GO:1901984
positive regulation of telomere maintenance via telomerase	Gene Ontology	GO:0032212	1	6	0.215731	0.611354	NEK2	http://amigo.geneontology.org/amigo/term/GO:0032212
response to isoquinoline alkaloid	Gene Ontology	GO:0014072	1	6	0.215731	0.611354	TACR3	http://amigo.geneontology.org/amigo/term/GO:0014072
dermatan sulfate proteoglycan metabolic process	Gene Ontology	GO:0050655	1	6	0.215731	0.611354	NCAN	http://amigo.geneontology.org/amigo/term/GO:0050655
heme-copper terminal oxidase activity	Gene Ontology	GO:0015002	1	6	0.215731	0.611354	COX7B2	http://amigo.geneontology.org/amigo/term/GO:0015002
positive regulation of reactive oxygen species biosynthetic process	Gene Ontology	GO:1903428	1	6	0.215731	0.611354	IL6	http://amigo.geneontology.org/amigo/term/GO:1903428
oxidoreductase activity, acting on the aldehyde or oxo group of donors, NAD or NADP as acceptor	Gene Ontology	GO:0016620	1	6	0.215731	0.611354	ALDH1A1	http://amigo.geneontology.org/amigo/term/GO:0016620
nucleotide transport	Gene Ontology	GO:0006862	1	6	0.215731	0.611354	CALHM1	http://amigo.geneontology.org/amigo/term/GO:0006862
pyrimidine nucleoside biosynthetic process	Gene Ontology	GO:0046134	1	6	0.215731	0.611354	TK1	http://amigo.geneontology.org/amigo/term/GO:0046134
lung epithelial cell differentiation	Gene Ontology	GO:0060487	1	6	0.215731	0.611354	AGR2	http://amigo.geneontology.org/amigo/term/GO:0060487
keratan sulfate catabolic process	Gene Ontology	GO:0042340	1	6	0.215731	0.611354	OGN	http://amigo.geneontology.org/amigo/term/GO:0042340
sleep	Gene Ontology	GO:0030431	1	6	0.215731	0.611354	OXTR	http://amigo.geneontology.org/amigo/term/GO:0030431
monocarboxylic acid transmembrane transporter activity	Gene Ontology	GO:0008028	1	6	0.215731	0.611354	SLC5A8	http://amigo.geneontology.org/amigo/term/GO:0008028
negative regulation of calcium ion transmembrane transport	Gene Ontology	GO:1903170	1	6	0.215731	0.611354	ATP1A2	http://amigo.geneontology.org/amigo/term/GO:1903170
aldo-keto reductase (NADP) activity	Gene Ontology	GO:0004033	1	6	0.215731	0.611354	AKR1C3	http://amigo.geneontology.org/amigo/term/GO:0004033
negative regulation of response to endoplasmic reticulum stress	Gene Ontology	GO:1903573	1	6	0.215731	0.611354	CREB3L1	http://amigo.geneontology.org/amigo/term/GO:1903573
euchromatin	Gene Ontology	GO:0000791	1	6	0.215731	0.611354	HIST1H1D	http://amigo.geneontology.org/amigo/term/GO:0000791
neuronal cell body membrane	Gene Ontology	GO:0032809	1	6	0.215731	0.611354	KCNA2	http://amigo.geneontology.org/amigo/term/GO:0032809
positive regulation of chemokine (C-X-C motif) ligand 2 production	Gene Ontology	GO:2000343	1	6	0.215731	0.611354	POSTN	http://amigo.geneontology.org/amigo/term/GO:2000343
hepatocyte proliferation	Gene Ontology	GO:0072574	1	6	0.215731	0.611354	MKI67	http://amigo.geneontology.org/amigo/term/GO:0072574
protein kinase C signaling	Gene Ontology	GO:0070528	1	6	0.215731	0.611354	MAS1	http://amigo.geneontology.org/amigo/term/GO:0070528
transforming growth factor beta production	Gene Ontology	GO:0071604	1	6	0.215731	0.611354	CX3CL1	http://amigo.geneontology.org/amigo/term/GO:0071604
regulation of response to endoplasmic reticulum stress	Gene Ontology	GO:1905897	1	6	0.215731	0.611354	MAGEA3	http://amigo.geneontology.org/amigo/term/GO:1905897
bone mineralization involved in bone maturation	Gene Ontology	GO:0035630	1	6	0.215731	0.611354	IGF1	http://amigo.geneontology.org/amigo/term/GO:0035630
regulation of intrinsic apoptotic signaling pathway in response to DNA damage by p53 class mediator	Gene Ontology	GO:1902165	1	6	0.215731	0.611354	MUC1	http://amigo.geneontology.org/amigo/term/GO:1902165
aggresome	Gene Ontology	GO:0016235	1	6	0.215731	0.611354	HSPB7	http://amigo.geneontology.org/amigo/term/GO:0016235
cardiac cell fate commitment	Gene Ontology	GO:0060911	1	6	0.215731	0.611354	NKX2-5	http://amigo.geneontology.org/amigo/term/GO:0060911
organic acid:sodium symporter activity	Gene Ontology	GO:0005343	1	6	0.215731	0.611354	SLC1A1	http://amigo.geneontology.org/amigo/term/GO:0005343
semaphorin-plexin signaling pathway	Gene Ontology	GO:0071526	1	6	0.215731	0.611354	PLXNA4	http://amigo.geneontology.org/amigo/term/GO:0071526
potassium channel regulator activity	Gene Ontology	GO:0015459	1	6	0.215731	0.611354	CAV1	http://amigo.geneontology.org/amigo/term/GO:0015459
cellular response to lipoprotein particle stimulus	Gene Ontology	GO:0071402	1	6	0.215731	0.611354	CD36	http://amigo.geneontology.org/amigo/term/GO:0071402
neurotransmitter receptor complex	Gene Ontology	GO:0098878	1	6	0.215731	0.611354	HTR3A	http://amigo.geneontology.org/amigo/term/GO:0098878
cranial skeletal system development	Gene Ontology	GO:1904888	1	6	0.215731	0.611354	SIX2	http://amigo.geneontology.org/amigo/term/GO:1904888
Wnt signaling pathway involved in somitogenesis	Gene Ontology	GO:0090244	1	6	0.215731	0.611354	DKK1	http://amigo.geneontology.org/amigo/term/GO:0090244
homeostasis of number of cells within a tissue	Gene Ontology	GO:0048873	1	6	0.215731	0.611354	ILDR2	http://amigo.geneontology.org/amigo/term/GO:0048873
axonal transport	Gene Ontology	GO:0098930	1	6	0.215731	0.611354	KIF1A	http://amigo.geneontology.org/amigo/term/GO:0098930
response to dietary excess	Gene Ontology	GO:0002021	1	6	0.215731	0.611354	BMP8A	http://amigo.geneontology.org/amigo/term/GO:0002021
GPI anchor biosynthetic process	Gene Ontology	GO:0006506	1	6	0.215731	0.611354	CWH43	http://amigo.geneontology.org/amigo/term/GO:0006506
neuron death	Gene Ontology	GO:0070997	6	112	0.216063	0.611901	IGF1|ASCL1|CD34|IL6|KCNB1|MEOX2	http://amigo.geneontology.org/amigo/term/GO:0070997
innate immune response in mucosa	Gene Ontology	GO:0002227	4	66	0.216479	0.61191	HIST1H2BD|HIST1H2BF|BPIFB1|HIST1H2BC	http://amigo.geneontology.org/amigo/term/GO:0002227
negative regulation of protein modification process	Gene Ontology	GO:0031400	5	89	0.218025	0.615885	PPP1R1A|MLXIPL|DMD|HHATL|DKK1	http://amigo.geneontology.org/amigo/term/GO:0031400
enzyme regulator activity	Gene Ontology	GO:0030234	8	161	0.221358	0.618081	CCKBR|NPR3|PSAPL1|BGN|HN1|PIF1|UMODL1|A2ML1	http://amigo.geneontology.org/amigo/term/GO:0030234
mitochondrion	Gene Ontology	GO:0005739	12	260	0.22144	0.618081	MAGEA11|ACACB|IFI6|CRYAB|G0S2|CDK1|PPM1E|DMGDH|COX7A1|TERT|NAT8L|COX7B2	http://amigo.geneontology.org/amigo/term/GO:0005739
skeletal system morphogenesis	Gene Ontology	GO:0048705	6	113	0.221526	0.618081	HOXB1|FBN2|CYP26B1|FREM1|NKX3-2|HOXA2	http://amigo.geneontology.org/amigo/term/GO:0048705
Wnt signaling pathway, planar cell polarity pathway	Gene Ontology	GO:0060071	2	24	0.222007	0.618081	SFRP1|CTHRC1	http://amigo.geneontology.org/amigo/term/GO:0060071
cellular response to monosaccharide stimulus	Gene Ontology	GO:0071326	2	24	0.222007	0.618081	GATA4|NEUROD1	http://amigo.geneontology.org/amigo/term/GO:0071326
regulation of plasma membrane bounded cell projection assembly	Gene Ontology	GO:0120032	2	24	0.222007	0.618081	KIT|CLRN1	http://amigo.geneontology.org/amigo/term/GO:0120032
microbody	Gene Ontology	GO:0042579	2	24	0.222007	0.618081	URAD|ACSL1	http://amigo.geneontology.org/amigo/term/GO:0042579
response to fibroblast growth factor	Gene Ontology	GO:0071774	2	24	0.222007	0.618081	EGR3|SFRP1	http://amigo.geneontology.org/amigo/term/GO:0071774
positive regulation of autophagy of mitochondrion	Gene Ontology	GO:1903599	2	24	0.222007	0.618081	MYH11|SLC22A3	http://amigo.geneontology.org/amigo/term/GO:1903599
membrane lipid metabolic process	Gene Ontology	GO:0006643	2	24	0.222007	0.618081	AGMO|GAL3ST2	http://amigo.geneontology.org/amigo/term/GO:0006643
regulation of extrinsic apoptotic signaling pathway via death domain receptors	Gene Ontology	GO:1902041	2	24	0.222007	0.618081	BMPR1B|ZSWIM2	http://amigo.geneontology.org/amigo/term/GO:1902041
morphogenesis of a polarized epithelium	Gene Ontology	GO:0001738	2	24	0.222007	0.618081	GPC3|FZD4	http://amigo.geneontology.org/amigo/term/GO:0001738
calcium ion transmembrane transporter activity	Gene Ontology	GO:0015085	2	24	0.222007	0.618081	JPH3|DMD	http://amigo.geneontology.org/amigo/term/GO:0015085
regulation of mRNA processing	Gene Ontology	GO:0050684	2	24	0.222007	0.618081	HMX2|CELF3	http://amigo.geneontology.org/amigo/term/GO:0050684
primary active transmembrane transporter activity	Gene Ontology	GO:0015399	2	24	0.222007	0.618081	ABCA6|ABCB1	http://amigo.geneontology.org/amigo/term/GO:0015399
response to progesterone	Gene Ontology	GO:0032570	2	24	0.222007	0.618081	TYMS|CAV1	http://amigo.geneontology.org/amigo/term/GO:0032570
positive regulation of nucleotide metabolic process	Gene Ontology	GO:0045981	2	24	0.222007	0.618081	MLXIPL|HTR2A	http://amigo.geneontology.org/amigo/term/GO:0045981
meiotic cell cycle process	Gene Ontology	GO:1903046	2	24	0.222007	0.618081	CYP26B1|ESPL1	http://amigo.geneontology.org/amigo/term/GO:1903046
cellular response to fatty acid	Gene Ontology	GO:0071398	2	24	0.222007	0.618081	E2F1|AKR1C2	http://amigo.geneontology.org/amigo/term/GO:0071398
actin filament bundle assembly	Gene Ontology	GO:0051017	2	24	0.222007	0.618081	KISS1R|SFRP1	http://amigo.geneontology.org/amigo/term/GO:0051017
cellular response to BMP stimulus	Gene Ontology	GO:0071773	2	24	0.222007	0.618081	TGFBR3|DLX5	http://amigo.geneontology.org/amigo/term/GO:0071773
regulation of cell cycle G1/S phase transition	Gene Ontology	GO:1902806	2	24	0.222007	0.618081	CDC45|E2F1	http://amigo.geneontology.org/amigo/term/GO:1902806
regulation of cellular protein localization	Gene Ontology	GO:1903827	4	67	0.223729	0.622092	TP63|GPHA2|GPR26|ADIPOQ	http://amigo.geneontology.org/amigo/term/GO:1903827
GTP binding	Gene Ontology	GO:0005525	4	67	0.223729	0.622092	MOCS1|ACSM5|MRAS|GNAI1	http://amigo.geneontology.org/amigo/term/GO:0005525
regulation of animal organ morphogenesis	Gene Ontology	GO:2000027	5	90	0.224226	0.622792	HN1|RSPO3|CAV3|SIX2|HPN	http://amigo.geneontology.org/amigo/term/GO:2000027
regulation of cell cycle arrest	Gene Ontology	GO:0071156	3	45	0.224682	0.622792	CCNB1|MYOG|E2F1	http://amigo.geneontology.org/amigo/term/GO:0071156
negative regulation of epithelial cell proliferation	Gene Ontology	GO:0050680	3	45	0.224682	0.622792	SOX2|PTN|ATOH8	http://amigo.geneontology.org/amigo/term/GO:0050680
anion transmembrane transporter activity	Gene Ontology	GO:0008509	3	45	0.224682	0.622792	SLC7A10|GABRA3|SLCO1C1	http://amigo.geneontology.org/amigo/term/GO:0008509
actin binding	Gene Ontology	GO:0003779	3	45	0.224682	0.622792	SORBS1|LPL|MISP	http://amigo.geneontology.org/amigo/term/GO:0003779
cysteine-type peptidase activity	Gene Ontology	GO:0008234	4	68	0.23104	0.637871	USP44|KLF4|CAPN11|GSN	http://amigo.geneontology.org/amigo/term/GO:0008234
glycerophospholipid metabolic process	Gene Ontology	GO:0006650	4	68	0.23104	0.637871	SLC44A4|CFD|GPD1|CD19	http://amigo.geneontology.org/amigo/term/GO:0006650
asymmetric synapse	Gene Ontology	GO:0032279	2	25	0.234716	0.637871	NETO1|MT3	http://amigo.geneontology.org/amigo/term/GO:0032279
cellular response to alcohol	Gene Ontology	GO:0097306	2	25	0.234716	0.637871	KLF4|CCL7	http://amigo.geneontology.org/amigo/term/GO:0097306
regulation of systemic arterial blood pressure by hormone	Gene Ontology	GO:0001990	2	25	0.234716	0.637871	EDN2|OXTR	http://amigo.geneontology.org/amigo/term/GO:0001990
cellular response to carbohydrate stimulus	Gene Ontology	GO:0071322	2	25	0.234716	0.637871	MLXIPL|APOC3	http://amigo.geneontology.org/amigo/term/GO:0071322
dorsal/ventral pattern formation	Gene Ontology	GO:0009953	2	25	0.234716	0.637871	SP8|NKX6-1	http://amigo.geneontology.org/amigo/term/GO:0009953
phthalate metabolic process	Gene Ontology	GO:0018963	2	25	0.234716	0.637871	SRD5A2|TH	http://amigo.geneontology.org/amigo/term/GO:0018963
membrane protein ectodomain proteolysis	Gene Ontology	GO:0006509	2	25	0.234716	0.637871	SH3D19|GPLD1	http://amigo.geneontology.org/amigo/term/GO:0006509
intracellular estrogen receptor signaling pathway	Gene Ontology	GO:0030520	2	25	0.234716	0.637871	FOXH1|ESR2	http://amigo.geneontology.org/amigo/term/GO:0030520
cellular response to stimulus	Gene Ontology	GO:0051716	107	2814	0.234902	0.637871	AOC2|TBX20|IL21|TIMP4|APOC3|APCDD1|PYCR1|CAV2|ADIPOQ|LINGO1|HIST1H4J|EDN3|RAX|IL36RN|TONSL|TNIP3|NMU|UMODL1|DEPDC1B|F7|GNG4|MFAP4|NPW|STARD10|FOXP3|OR2L13|DMD|APLP1|CHL1|PPP1R1A|LILRB5|GALR1|TPTE|PRLH|TNFRSF9|CEACAM6|CCL20|GDF10|IGF1|HCAR2|NPHS1|FGF1|GINS2|KCNH2|LRRC15|CALML5|NEIL3|SLC22A3|GABRD|SLC18A1|SEZ6L|EPHA8|LAG3|UBE2T|GABRA4|GABRA3|DACT2|TP63|SIK2|S1PR1|RAD51AP1|C19orf80|TYRO3|PTTG1|RIMS2…	http://amigo.geneontology.org/amigo/term/GO:0051716
G protein-coupled receptor signaling pathway, coupled to cyclic nucleotide second messenger	Gene Ontology	GO:0007187	8	164	0.235171	0.637871	PSAPL1|ADRB2|SSTR2|OPRD1|GRM4|HTR1E|GLP2R|GNAI1	http://amigo.geneontology.org/amigo/term/GO:0007187
negative regulation of intracellular signal transduction	Gene Ontology	GO:1902532	5	92	0.236782	0.637871	MAGEA3|CREB3L1|FOXM1|PBK|MMP9	http://amigo.geneontology.org/amigo/term/GO:1902532
transition metal ion homeostasis	Gene Ontology	GO:0055076	4	69	0.238408	0.637871	TFR2|S100A8|TMPRSS6|SCARA5	http://amigo.geneontology.org/amigo/term/GO:0055076
regulation of RNA metabolic process	Gene Ontology	GO:0051252	57	1458	0.241589	0.637871	HIF3A|HIST1H4B|DMRT2|INSM1|TBR1|HIST1H2AL|ZNF280A|TXNIP|HIST1H2AD|TLX3|MNX1|CBX2|HIST2H4A|NUPR1L|AMH|TMEM100|FEZF2|EGR2|OTX1|FOXA3|SIX2|INHBA|GAL|RELN|DLX4|DLX5|IRX6|CREB5|RAX2|CDKN2A|BMP8A|MUC1|LBX1|FOXD3|DPRX|HIST1H3C|PAX7|HIST2H3D|FOXD4L1|GATA4|FOXH1|CIDEC|E2F7|LHX3|SFRP1|BMP3|CRABP2|E2F1|TLX1|ADAM8|EMX1|HN1|PRAME|RIPPLY3|CREB3L1|PDX1|HIST3H2A	http://amigo.geneontology.org/amigo/term/GO:0051252
cytoplasmic microtubule organization	Gene Ontology	GO:0031122	1	7	0.242492	0.637871	MAST1	http://amigo.geneontology.org/amigo/term/GO:0031122
positive regulation of response to drug	Gene Ontology	GO:2001025	1	7	0.242492	0.637871	GAL	http://amigo.geneontology.org/amigo/term/GO:2001025
response to iron ion	Gene Ontology	GO:0010039	1	7	0.242492	0.637871	PDX1	http://amigo.geneontology.org/amigo/term/GO:0010039
cytoplasmic stress granule	Gene Ontology	GO:0010494	1	7	0.242492	0.637871	ZFP36	http://amigo.geneontology.org/amigo/term/GO:0010494
positive regulation of renal sodium excretion	Gene Ontology	GO:0035815	1	7	0.242492	0.637871	TACR1	http://amigo.geneontology.org/amigo/term/GO:0035815
positive regulation of mast cell chemotaxis	Gene Ontology	GO:0060754	1	7	0.242492	0.637871	FIGF	http://amigo.geneontology.org/amigo/term/GO:0060754
antigen processing and presentation of endogenous peptide antigen via MHC class Ib	Gene Ontology	GO:0002476	1	7	0.242492	0.637871	ABCB5	http://amigo.geneontology.org/amigo/term/GO:0002476
positive regulation of protein localization to membrane	Gene Ontology	GO:1905477	1	7	0.242492	0.637871	E2F1	http://amigo.geneontology.org/amigo/term/GO:1905477
negative regulation of cytokine biosynthetic process	Gene Ontology	GO:0042036	1	7	0.242492	0.637871	LAG3	http://amigo.geneontology.org/amigo/term/GO:0042036
ventricular septum morphogenesis	Gene Ontology	GO:0060412	1	7	0.242492	0.637871	NKX2-5	http://amigo.geneontology.org/amigo/term/GO:0060412
Sertoli cell development	Gene Ontology	GO:0060009	1	7	0.242492	0.637871	ESR2	http://amigo.geneontology.org/amigo/term/GO:0060009
regulation of transcription initiation from RNA polymerase II promoter	Gene Ontology	GO:0060260	1	7	0.242492	0.637871	NKX2-5	http://amigo.geneontology.org/amigo/term/GO:0060260
cellular component disassembly involved in execution phase of apoptosis	Gene Ontology	GO:0006921	1	7	0.242492	0.637871	ACVR1C	http://amigo.geneontology.org/amigo/term/GO:0006921
insulin secretion involved in cellular response to glucose stimulus	Gene Ontology	GO:0035773	1	7	0.242492	0.637871	PTPRN	http://amigo.geneontology.org/amigo/term/GO:0035773
positive regulation of embryonic development	Gene Ontology	GO:0040019	1	7	0.242492	0.637871	SCX	http://amigo.geneontology.org/amigo/term/GO:0040019
regulation of interleukin-13 production	Gene Ontology	GO:0032656	1	7	0.242492	0.637871	IFNL1	http://amigo.geneontology.org/amigo/term/GO:0032656
positive regulation of transforming growth factor beta receptor signaling pathway	Gene Ontology	GO:0030511	1	7	0.242492	0.637871	ADAM18	http://amigo.geneontology.org/amigo/term/GO:0030511
lipid phosphatase activity	Gene Ontology	GO:0042577	1	7	0.242492	0.637871	PRG4	http://amigo.geneontology.org/amigo/term/GO:0042577
cyclic nucleotide-dependent protein kinase activity	Gene Ontology	GO:0004690	1	7	0.242492	0.637871	PRKAR2B	http://amigo.geneontology.org/amigo/term/GO:0004690
regulation of adherens junction organization	Gene Ontology	GO:1903391	1	7	0.242492	0.637871	MAST1	http://amigo.geneontology.org/amigo/term/GO:1903391
hydrolase activity, acting on carbon-nitrogen (but not peptide) bonds, in cyclic amidines	Gene Ontology	GO:0016814	1	7	0.242492	0.637871	AMPD1	http://amigo.geneontology.org/amigo/term/GO:0016814
regulation of circadian sleep/wake cycle, sleep	Gene Ontology	GO:0045187	1	7	0.242492	0.637871	UTS2	http://amigo.geneontology.org/amigo/term/GO:0045187
anaphase-promoting complex	Gene Ontology	GO:0005680	1	7	0.242492	0.637871	UBE2S	http://amigo.geneontology.org/amigo/term/GO:0005680
epinephrine transport	Gene Ontology	GO:0048241	1	7	0.242492	0.637871	CARTPT	http://amigo.geneontology.org/amigo/term/GO:0048241
transcription elongation factor complex	Gene Ontology	GO:0008023	1	7	0.242492	0.637871	TONSL	http://amigo.geneontology.org/amigo/term/GO:0008023
mitochondrial genome maintenance	Gene Ontology	GO:0000002	1	7	0.242492	0.637871	PIF1	http://amigo.geneontology.org/amigo/term/GO:0000002
positive regulation of DNA endoreduplication	Gene Ontology	GO:0032877	1	7	0.242492	0.637871	E2F8	http://amigo.geneontology.org/amigo/term/GO:0032877
maternal placenta development	Gene Ontology	GO:0001893	1	7	0.242492	0.637871	SLC7A11	http://amigo.geneontology.org/amigo/term/GO:0001893
epinephrine secretion	Gene Ontology	GO:0048242	1	7	0.242492	0.637871	CARTPT	http://amigo.geneontology.org/amigo/term/GO:0048242
plasma membrane phospholipid scrambling	Gene Ontology	GO:0017121	1	7	0.242492	0.637871	PLSCR4	http://amigo.geneontology.org/amigo/term/GO:0017121
deoxyribonucleoside diphosphate metabolic process	Gene Ontology	GO:0009186	1	7	0.242492	0.637871	RRM2	http://amigo.geneontology.org/amigo/term/GO:0009186
regulation of endocrine process	Gene Ontology	GO:0044060	1	7	0.242492	0.637871	GAL	http://amigo.geneontology.org/amigo/term/GO:0044060
ventricular trabecula myocardium morphogenesis	Gene Ontology	GO:0003222	1	7	0.242492	0.637871	NRG1	http://amigo.geneontology.org/amigo/term/GO:0003222
regulation of glucan biosynthetic process	Gene Ontology	GO:0010962	1	7	0.242492	0.637871	IGF1	http://amigo.geneontology.org/amigo/term/GO:0010962
cyclic-nucleotide phosphodiesterase activity	Gene Ontology	GO:0004112	1	7	0.242492	0.637871	PDE2A	http://amigo.geneontology.org/amigo/term/GO:0004112
negative regulation of smoothened signaling pathway	Gene Ontology	GO:0045879	1	7	0.242492	0.637871	GPR37L1	http://amigo.geneontology.org/amigo/term/GO:0045879
response to food	Gene Ontology	GO:0032094	1	7	0.242492	0.637871	CLPS	http://amigo.geneontology.org/amigo/term/GO:0032094
dopaminergic neuron differentiation	Gene Ontology	GO:0071542	1	7	0.242492	0.637871	FIGF	http://amigo.geneontology.org/amigo/term/GO:0071542
insulin-like growth factor receptor signaling pathway	Gene Ontology	GO:0048009	1	7	0.242492	0.637871	IGF1	http://amigo.geneontology.org/amigo/term/GO:0048009
steroid dehydrogenase activity	Gene Ontology	GO:0016229	1	7	0.242492	0.637871	HSD11B1	http://amigo.geneontology.org/amigo/term/GO:0016229
response to glucagon	Gene Ontology	GO:0033762	1	7	0.242492	0.637871	GLP2R	http://amigo.geneontology.org/amigo/term/GO:0033762
steroid dehydrogenase activity, acting on the CH-OH group of donors, NAD or NADP as acceptor	Gene Ontology	GO:0033764	1	7	0.242492	0.637871	AKR1C3	http://amigo.geneontology.org/amigo/term/GO:0033764
negative chemotaxis	Gene Ontology	GO:0050919	1	7	0.242492	0.637871	ROBO2	http://amigo.geneontology.org/amigo/term/GO:0050919
substrate-independent telencephalic tangential migration	Gene Ontology	GO:0021826	1	7	0.242492	0.637871	FEZF2	http://amigo.geneontology.org/amigo/term/GO:0021826
antigen binding	Gene Ontology	GO:0003823	1	7	0.242492	0.637871	CD209	http://amigo.geneontology.org/amigo/term/GO:0003823
cochlea development	Gene Ontology	GO:0090102	1	7	0.242492	0.637871	GABRA5	http://amigo.geneontology.org/amigo/term/GO:0090102
ephrin receptor activity	Gene Ontology	GO:0005003	1	7	0.242492	0.637871	EPHB1	http://amigo.geneontology.org/amigo/term/GO:0005003
clathrin binding	Gene Ontology	GO:0030276	1	7	0.242492	0.637871	HMP19	http://amigo.geneontology.org/amigo/term/GO:0030276
establishment of planar polarity of embryonic epithelium	Gene Ontology	GO:0042249	1	7	0.242492	0.637871	CTHRC1	http://amigo.geneontology.org/amigo/term/GO:0042249
negative regulation of autophagy	Gene Ontology	GO:0010507	1	7	0.242492	0.637871	LEP	http://amigo.geneontology.org/amigo/term/GO:0010507
glucose import	Gene Ontology	GO:0046323	1	7	0.242492	0.637871	IGF1	http://amigo.geneontology.org/amigo/term/GO:0046323
negative regulation of peptidyl-tyrosine phosphorylation	Gene Ontology	GO:0050732	1	7	0.242492	0.637871	SFRP1	http://amigo.geneontology.org/amigo/term/GO:0050732
icosanoid transport	Gene Ontology	GO:0071715	1	7	0.242492	0.637871	ANXA1	http://amigo.geneontology.org/amigo/term/GO:0071715
nitric-oxide synthase activity	Gene Ontology	GO:0004517	1	7	0.242492	0.637871	LEP	http://amigo.geneontology.org/amigo/term/GO:0004517
demethylase activity	Gene Ontology	GO:0032451	1	7	0.242492	0.637871	CYP1A1	http://amigo.geneontology.org/amigo/term/GO:0032451
glycerol transport	Gene Ontology	GO:0015793	1	7	0.242492	0.637871	AQP7	http://amigo.geneontology.org/amigo/term/GO:0015793
circadian sleep/wake cycle, sleep	Gene Ontology	GO:0050802	1	7	0.242492	0.637871	KCNA2	http://amigo.geneontology.org/amigo/term/GO:0050802
negative regulation of toll-like receptor 4 signaling pathway	Gene Ontology	GO:0034144	1	7	0.242492	0.637871	BPIFB1	http://amigo.geneontology.org/amigo/term/GO:0034144
cell growth involved in cardiac muscle cell development	Gene Ontology	GO:0061049	1	7	0.242492	0.637871	CAV3	http://amigo.geneontology.org/amigo/term/GO:0061049
negative regulation of peptidyl-cysteine S-nitrosylation	Gene Ontology	GO:1902083	1	7	0.242492	0.637871	DMD	http://amigo.geneontology.org/amigo/term/GO:1902083
striated muscle cell apoptotic process	Gene Ontology	GO:0010658	1	7	0.242492	0.637871	NKX2-5	http://amigo.geneontology.org/amigo/term/GO:0010658
female genitalia development	Gene Ontology	GO:0030540	1	7	0.242492	0.637871	TYRO3	http://amigo.geneontology.org/amigo/term/GO:0030540
regulation of glycoprotein metabolic process	Gene Ontology	GO:1903018	1	7	0.242492	0.637871	MT3	http://amigo.geneontology.org/amigo/term/GO:1903018
myosin filament	Gene Ontology	GO:0032982	1	7	0.242492	0.637871	MYOM1	http://amigo.geneontology.org/amigo/term/GO:0032982
luteinizing hormone secretion	Gene Ontology	GO:0032275	1	7	0.242492	0.637871	FOXD1	http://amigo.geneontology.org/amigo/term/GO:0032275
NADH metabolic process	Gene Ontology	GO:0006734	1	7	0.242492	0.637871	GPD1	http://amigo.geneontology.org/amigo/term/GO:0006734
positive regulation of TOR signaling	Gene Ontology	GO:0032008	1	7	0.242492	0.637871	LEP	http://amigo.geneontology.org/amigo/term/GO:0032008
regulation of low-density lipoprotein particle receptor biosynthetic process	Gene Ontology	GO:0045714	1	7	0.242492	0.637871	ADIPOQ	http://amigo.geneontology.org/amigo/term/GO:0045714
sulfur compound biosynthetic process	Gene Ontology	GO:0044272	3	47	0.242897	0.638181	OGN|NDST4|ANGPT1	http://amigo.geneontology.org/amigo/term/GO:0044272
nerve development	Gene Ontology	GO:0021675	3	47	0.242897	0.638181	NKX2-2|GABRA5|COL25A1	http://amigo.geneontology.org/amigo/term/GO:0021675
regulation of focal adhesion assembly	Gene Ontology	GO:0051893	2	26	0.247464	0.647114	MYOC|MAST1	http://amigo.geneontology.org/amigo/term/GO:0051893
response to gamma radiation	Gene Ontology	GO:0010332	2	26	0.247464	0.647114	EGR1|CAV1	http://amigo.geneontology.org/amigo/term/GO:0010332
cellular glucose homeostasis	Gene Ontology	GO:0001678	2	26	0.247464	0.647114	CARTPT|TH	http://amigo.geneontology.org/amigo/term/GO:0001678
regulation of protein targeting	Gene Ontology	GO:1903533	2	26	0.247464	0.647114	KCNB1|LRRC46	http://amigo.geneontology.org/amigo/term/GO:1903533
regulation of steroid biosynthetic process	Gene Ontology	GO:0050810	2	26	0.247464	0.647114	LEP|APOB	http://amigo.geneontology.org/amigo/term/GO:0050810
cellular carbohydrate biosynthetic process	Gene Ontology	GO:0034637	2	26	0.247464	0.647114	PCK1|HAS3	http://amigo.geneontology.org/amigo/term/GO:0034637
posttranscriptional regulation of gene expression	Gene Ontology	GO:0010608	6	118	0.249489	0.65164	SOX11|PADI6|LIN28A|APOBEC1|EIF4E1B|ACO1	http://amigo.geneontology.org/amigo/term/GO:0010608
signal transduction by p53 class mediator	Gene Ontology	GO:0072331	4	71	0.253303	0.660435	E2F7|TPX2|EXO1|AURKA	http://amigo.geneontology.org/amigo/term/GO:0072331
cell differentiation involved in kidney development	Gene Ontology	GO:0061005	4	71	0.253303	0.660435	FOXJ1|CD34|SIX2|LHX1	http://amigo.geneontology.org/amigo/term/GO:0061005
ribonucleotide metabolic process	Gene Ontology	GO:0009259	9	194	0.258602	0.672745	NPR1|DGAT2|MLXIPL|ACSL1|PDE3B|GPAM|PDK4|IGF1|PDE2A	http://amigo.geneontology.org/amigo/term/GO:0009259
entry into host cell	Gene Ontology	GO:0030260	2	27	0.260234	0.672745	CLEC5A|HTR2A	http://amigo.geneontology.org/amigo/term/GO:0030260
carbohydrate transport	Gene Ontology	GO:0008643	2	27	0.260234	0.672745	NR4A3|ITLN1	http://amigo.geneontology.org/amigo/term/GO:0008643
vitamin binding	Gene Ontology	GO:0019842	2	27	0.260234	0.672745	PYGM|KL	http://amigo.geneontology.org/amigo/term/GO:0019842
trans-Golgi network	Gene Ontology	GO:0005802	2	27	0.260234	0.672745	SLC24A5|SOD3	http://amigo.geneontology.org/amigo/term/GO:0005802
kidney morphogenesis	Gene Ontology	GO:0060993	3	49	0.261337	0.672745	TCF21|SIX2|FOXD1	http://amigo.geneontology.org/amigo/term/GO:0060993
neuropeptide signaling pathway	Gene Ontology	GO:0007218	7	145	0.263125	0.672745	PYY|NMUR1|GPR139|RXFP3|OPRD1|PENK|TACR3	http://amigo.geneontology.org/amigo/term/GO:0007218
positive regulation of Notch signaling pathway	Gene Ontology	GO:0045747	1	8	0.26834	0.672745	ASCL1	http://amigo.geneontology.org/amigo/term/GO:0045747
regulation of chromatin silencing	Gene Ontology	GO:0031935	1	8	0.26834	0.672745	APOBEC1	http://amigo.geneontology.org/amigo/term/GO:0031935
positive regulation of membrane permeability	Gene Ontology	GO:1905710	1	8	0.26834	0.672745	E2F1	http://amigo.geneontology.org/amigo/term/GO:1905710
negative regulation of cell size	Gene Ontology	GO:0045792	1	8	0.26834	0.672745	CAV3	http://amigo.geneontology.org/amigo/term/GO:0045792
molting cycle process	Gene Ontology	GO:0022404	1	8	0.26834	0.672745	GAL	http://amigo.geneontology.org/amigo/term/GO:0022404
phosphatidylinositol-4,5-bisphosphate binding	Gene Ontology	GO:0005546	1	8	0.26834	0.672745	AMER2	http://amigo.geneontology.org/amigo/term/GO:0005546
scaffold protein binding	Gene Ontology	GO:0097110	1	8	0.26834	0.672745	KCNH2	http://amigo.geneontology.org/amigo/term/GO:0097110
regulation of respiratory gaseous exchange by nervous system process	Gene Ontology	GO:0002087	1	8	0.26834	0.672745	TLX3	http://amigo.geneontology.org/amigo/term/GO:0002087
neurotransmitter transmembrane transporter activity	Gene Ontology	GO:0005326	1	8	0.26834	0.672745	SLC17A7	http://amigo.geneontology.org/amigo/term/GO:0005326
positive regulation of telomere maintenance	Gene Ontology	GO:0032206	1	8	0.26834	0.672745	MAPK15	http://amigo.geneontology.org/amigo/term/GO:0032206
retinoic acid receptor signaling pathway	Gene Ontology	GO:0048384	1	8	0.26834	0.672745	EZH2	http://amigo.geneontology.org/amigo/term/GO:0048384
regulation of glucose import	Gene Ontology	GO:0046324	1	8	0.26834	0.672745	SORBS1	http://amigo.geneontology.org/amigo/term/GO:0046324
positive regulation of sterol transport	Gene Ontology	GO:0032373	1	8	0.26834	0.672745	ADIPOQ	http://amigo.geneontology.org/amigo/term/GO:0032373
basal part of cell	Gene Ontology	GO:0045178	1	8	0.26834	0.672745	CD34	http://amigo.geneontology.org/amigo/term/GO:0045178
SA node cell to atrial cardiac muscle cell communication	Gene Ontology	GO:0086070	1	8	0.26834	0.672745	SCN5A	http://amigo.geneontology.org/amigo/term/GO:0086070
calcium-dependent phospholipid binding	Gene Ontology	GO:0005544	1	8	0.26834	0.672745	SYT1	http://amigo.geneontology.org/amigo/term/GO:0005544
ligase activity, forming carbon-sulfur bonds	Gene Ontology	GO:0016877	1	8	0.26834	0.672745	ACSL1	http://amigo.geneontology.org/amigo/term/GO:0016877
positive regulation of bone remodeling	Gene Ontology	GO:0046852	1	8	0.26834	0.672745	ADAM8	http://amigo.geneontology.org/amigo/term/GO:0046852
cell fate commitment involved in formation of primary germ layer	Gene Ontology	GO:0060795	1	8	0.26834	0.672745	SOX17	http://amigo.geneontology.org/amigo/term/GO:0060795
regulation of insulin receptor signaling pathway	Gene Ontology	GO:0046626	1	8	0.26834	0.672745	LEP	http://amigo.geneontology.org/amigo/term/GO:0046626
nucleosome disassembly	Gene Ontology	GO:0006337	1	8	0.26834	0.672745	HIST3H2A	http://amigo.geneontology.org/amigo/term/GO:0006337
ncRNA catabolic process	Gene Ontology	GO:0034661	1	8	0.26834	0.672745	LIN28B	http://amigo.geneontology.org/amigo/term/GO:0034661
face development	Gene Ontology	GO:0060324	1	8	0.26834	0.672745	SCX	http://amigo.geneontology.org/amigo/term/GO:0060324
peptide N-acetyltransferase activity	Gene Ontology	GO:0034212	1	8	0.26834	0.672745	NAT16	http://amigo.geneontology.org/amigo/term/GO:0034212
positive regulation of kidney development	Gene Ontology	GO:0090184	1	8	0.26834	0.672745	EGR1	http://amigo.geneontology.org/amigo/term/GO:0090184
glucose 6-phosphate metabolic process	Gene Ontology	GO:0051156	1	8	0.26834	0.672745	PFKFB1	http://amigo.geneontology.org/amigo/term/GO:0051156
carbohydrate transmembrane transporter activity	Gene Ontology	GO:0015144	1	8	0.26834	0.672745	SLC2A4	http://amigo.geneontology.org/amigo/term/GO:0015144
regulation of epithelial cell apoptotic process	Gene Ontology	GO:1904035	1	8	0.26834	0.672745	GSN	http://amigo.geneontology.org/amigo/term/GO:1904035
transition metal ion transmembrane transporter activity	Gene Ontology	GO:0046915	1	8	0.26834	0.672745	SLC30A8	http://amigo.geneontology.org/amigo/term/GO:0046915
regulation of cellular response to transforming growth factor beta stimulus	Gene Ontology	GO:1903844	1	8	0.26834	0.672745	TGFBR2	http://amigo.geneontology.org/amigo/term/GO:1903844
positive regulation of bone mineralization	Gene Ontology	GO:0030501	1	8	0.26834	0.672745	FBN2	http://amigo.geneontology.org/amigo/term/GO:0030501
membrane lipid catabolic process	Gene Ontology	GO:0046466	1	8	0.26834	0.672745	NEU4	http://amigo.geneontology.org/amigo/term/GO:0046466
phospholipid homeostasis	Gene Ontology	GO:0055091	1	8	0.26834	0.672745	CETP	http://amigo.geneontology.org/amigo/term/GO:0055091
regulation of branching involved in ureteric bud morphogenesis	Gene Ontology	GO:0090189	1	8	0.26834	0.672745	SIX2	http://amigo.geneontology.org/amigo/term/GO:0090189
negative regulation of glial cell proliferation	Gene Ontology	GO:0060253	1	8	0.26834	0.672745	PTN	http://amigo.geneontology.org/amigo/term/GO:0060253
vestibulocochlear nerve development	Gene Ontology	GO:0021562	1	8	0.26834	0.672745	PAX2	http://amigo.geneontology.org/amigo/term/GO:0021562
inositol phosphate-mediated signaling	Gene Ontology	GO:0048016	1	8	0.26834	0.672745	EDN2	http://amigo.geneontology.org/amigo/term/GO:0048016
positive regulation of positive chemotaxis	Gene Ontology	GO:0050927	1	8	0.26834	0.672745	FIGF	http://amigo.geneontology.org/amigo/term/GO:0050927
positive regulation of regulated secretory pathway	Gene Ontology	GO:1903307	1	8	0.26834	0.672745	KCNB1	http://amigo.geneontology.org/amigo/term/GO:1903307
positive regulation of cyclin-dependent protein serine/threonine kinase activity	Gene Ontology	GO:0045737	1	8	0.26834	0.672745	PROX1	http://amigo.geneontology.org/amigo/term/GO:0045737
peripheral nervous system neuron differentiation	Gene Ontology	GO:0048934	1	8	0.26834	0.672745	ONECUT2	http://amigo.geneontology.org/amigo/term/GO:0048934
regulation of metanephric nephron tubule epithelial cell differentiation	Gene Ontology	GO:0072307	1	8	0.26834	0.672745	PAX2	http://amigo.geneontology.org/amigo/term/GO:0072307
telomere capping	Gene Ontology	GO:0016233	1	8	0.26834	0.672745	HIST1H4K	http://amigo.geneontology.org/amigo/term/GO:0016233
intercalated disc	Gene Ontology	GO:0014704	1	8	0.26834	0.672745	CAV3	http://amigo.geneontology.org/amigo/term/GO:0014704
cell-cell fusion	Gene Ontology	GO:0140253	1	8	0.26834	0.672745	CXCL10	http://amigo.geneontology.org/amigo/term/GO:0140253
sphingosine-1-phosphate receptor signaling pathway	Gene Ontology	GO:0003376	1	8	0.26834	0.672745	S1PR1	http://amigo.geneontology.org/amigo/term/GO:0003376
inositol phosphate biosynthetic process	Gene Ontology	GO:0032958	1	8	0.26834	0.672745	ADCYAP1R1	http://amigo.geneontology.org/amigo/term/GO:0032958
regulation of developmental pigmentation	Gene Ontology	GO:0048070	1	8	0.26834	0.672745	ADAMTS20	http://amigo.geneontology.org/amigo/term/GO:0048070
regulation of fatty acid transport	Gene Ontology	GO:2000191	1	8	0.26834	0.672745	NTSR1	http://amigo.geneontology.org/amigo/term/GO:2000191
activating transcription factor binding	Gene Ontology	GO:0033613	1	8	0.26834	0.672745	EGR2	http://amigo.geneontology.org/amigo/term/GO:0033613
activation of transmembrane receptor protein tyrosine kinase activity	Gene Ontology	GO:0007171	1	8	0.26834	0.672745	ADRB2	http://amigo.geneontology.org/amigo/term/GO:0007171
negative regulation of response to biotic stimulus	Gene Ontology	GO:0002832	1	8	0.26834	0.672745	IRG1	http://amigo.geneontology.org/amigo/term/GO:0002832
cytosolic small ribosomal subunit	Gene Ontology	GO:0022627	1	8	0.26834	0.672745	HBA2	http://amigo.geneontology.org/amigo/term/GO:0022627
palmitoyltransferase activity	Gene Ontology	GO:0016409	1	8	0.26834	0.672745	ZDHHC22	http://amigo.geneontology.org/amigo/term/GO:0016409
glutamate receptor activity	Gene Ontology	GO:0008066	1	8	0.26834	0.672745	NLGN1	http://amigo.geneontology.org/amigo/term/GO:0008066
apoptotic process involved in morphogenesis	Gene Ontology	GO:0060561	1	8	0.26834	0.672745	NKX2-5	http://amigo.geneontology.org/amigo/term/GO:0060561
negative regulation of cell cycle arrest	Gene Ontology	GO:0071157	1	8	0.26834	0.672745	NUPR1L	http://amigo.geneontology.org/amigo/term/GO:0071157
positive regulation of viral genome replication	Gene Ontology	GO:0045070	1	8	0.26834	0.672745	TOP2A	http://amigo.geneontology.org/amigo/term/GO:0045070
brush border membrane	Gene Ontology	GO:0031526	1	8	0.26834	0.672745	CA4	http://amigo.geneontology.org/amigo/term/GO:0031526
response to ketone	Gene Ontology	GO:1901654	5	97	0.268952	0.673518	AKR1C3|TXNIP|KLF4|GNG2|CAV1	http://amigo.geneontology.org/amigo/term/GO:1901654
hydrolase activity, acting on glycosyl bonds	Gene Ontology	GO:0016798	2	28	0.273008	0.680219	CCNO|HPSE2	http://amigo.geneontology.org/amigo/term/GO:0016798
bone morphogenesis	Gene Ontology	GO:0060349	2	28	0.273008	0.680219	PAPPA2|FGF4	http://amigo.geneontology.org/amigo/term/GO:0060349
regulation of endothelial cell differentiation	Gene Ontology	GO:0045601	2	28	0.273008	0.680219	TMEM100|PROC	http://amigo.geneontology.org/amigo/term/GO:0045601
negative regulation of cell-cell adhesion	Gene Ontology	GO:0022408	2	28	0.273008	0.680219	ANXA1|PLA2G2F	http://amigo.geneontology.org/amigo/term/GO:0022408
positive regulation of cell-substrate adhesion	Gene Ontology	GO:0010811	2	28	0.273008	0.680219	SFRP1|CD36	http://amigo.geneontology.org/amigo/term/GO:0010811
regulation of vasoconstriction	Gene Ontology	GO:0019229	2	28	0.273008	0.680219	HTR2A|ATP1A2	http://amigo.geneontology.org/amigo/term/GO:0019229
dicarboxylic acid catabolic process	Gene Ontology	GO:0043649	2	28	0.273008	0.680219	ALDH1L1|ASPA	http://amigo.geneontology.org/amigo/term/GO:0043649
negative regulation of myeloid cell differentiation	Gene Ontology	GO:0045638	2	28	0.273008	0.680219	TMEM178A|HIST2H4A	http://amigo.geneontology.org/amigo/term/GO:0045638
positive regulation of apoptotic signaling pathway	Gene Ontology	GO:2001235	5	98	0.2755	0.686042	SFRP1|BMPR1B|IFNB1|IL19|CAV1	http://amigo.geneontology.org/amigo/term/GO:2001235
protein glycosylation	Gene Ontology	GO:0006486	4	74	0.275981	0.686856	FUT7|MUC21|B3GALT1|MUC19	http://amigo.geneontology.org/amigo/term/GO:0006486
phosphatidylinositol 3-kinase signaling	Gene Ontology	GO:0014065	6	123	0.278374	0.692421	ANGPT1|LEP|IGF1|NRG1|FGF4|FGF2	http://amigo.geneontology.org/amigo/term/GO:0014065
regulation of anatomical structure size	Gene Ontology	GO:0090066	7	148	0.278971	0.693518	EDN2|FN1|SEMA3G|PYDC1|PAK3|CAV1|GSN	http://amigo.geneontology.org/amigo/term/GO:0090066
organic cyclic compound biosynthetic process	Gene Ontology	GO:1901362	63	1645	0.279206	0.693607	FOXP3|HMX2|SALL3|POLQ|SSX1|CDKN1C|HIST1H4J|RHOXF1|SOHLH1|PAH|MOCS1|MALRD1|FOXM1|SOX3|NKX2-2|MAFA|PYCR1|DSC1|MNX1|MAGEA1|TP63|FOXH1|NEK2|INHBA|CD80|RIPPLY3|SIX2|CIDEC|GATA5|RELN|TYRP1|DLX4|DLX6|TERT|SPOCD1|DLX2|ATOH8|TGFBR3|NPR1|LBX1|MLXIPL|CYP21A2|HIST2H2AC|RXRG|LDB2|PPARG|PAX7|DDN|TCEAL5|ESR2|HIST1H3H|TRIP13|STON1-GTF2A1L|FGF2|SFRP1|BMP3|TLX2|ADRB2|MT3|PID1|FOXD4L1|HES6|MCIDAS	http://amigo.geneontology.org/amigo/term/GO:1901362
regulation of protein modification process	Gene Ontology	GO:0031399	20	485	0.27932	0.693607	FOXP3|F2|CCL7|FZD4|ELANE|KLF4|ROS1|CSF3|CDCA2|NEURL1|PRKAR2B|HTR2A|CCL23|ADAM18|GDF15|GDF10|HHATL|FGF2|ELFN2|CAV1	http://amigo.geneontology.org/amigo/term/GO:0031399
biosynthetic process	Gene Ontology	GO:0009058	67	1756	0.281917	0.699665	POLQ|PDE2A|AGMO|FOXG1|TBR1|HIST1H2AL|BMPR1B|SORBS1|MUC5B|INSM1|MYOG|HIST1H2AB|TBX10|DYDC1|LHX3|FZD4|RAD51AP1|SOX11|CPNE7|SIX2|IFNB1|LIN28A|HMGB3|KLF4|ZIC2|TH|DLX6|FADS6|ASF1B|HAS3|CRB2|CDKN2A|B3GALT1|HIST2H3D|ACACB|ASCL2|CENPF|NAT1|SLC24A5|CHRDL1|TMPRSS6|ORC1|SALL4|HOXC13|HOXC12|MCIDAS|SALL3|MUC5AC|CCNA2|HOXA4|HIST2H2AB|TP63|MLXIPL|CHST6|PFKFB1|URAD|TLX2|TLX3|ADRB2|GYS2|APOB|NKX3-2|RAD51|MT3|DAZL…	http://amigo.geneontology.org/amigo/term/GO:0009058
cytoplasmic vesicle membrane	Gene Ontology	GO:0030659	4	75	0.283615	0.702003	RASSF9|SYT1|SVOP|KCNJ4	http://amigo.geneontology.org/amigo/term/GO:0030659
phospholipid biosynthetic process	Gene Ontology	GO:0008654	4	75	0.283615	0.702003	FGF4|HTR2A|APOA1|APOA2	http://amigo.geneontology.org/amigo/term/GO:0008654
response to chemical	Gene Ontology	GO:0042221	86	2278	0.283708	0.702003	AOC1|PCK1|GHR|SLC6A4|CD36|HBB|EPO|APOC3|APLP1|RELN|CYP2A13|CENPF|OASL|TNIP3|GATA4|BRSK2|AVPR2|ACSL1|CSF3|DMD|SAA4|SLC7A3|KL|PTN|DRP2|TNFRSF9|GDF15|KCNA1|KCNIP2|OR2B11|SLC14A2|TUBB3|AKR7A3|FGF2|TACR1|KCNH2|FOSB|RET|CCR8|GAD1|AKR1C3|FGF4|CGA|S1PR1|IFNB1|FGF1|CST2|SRD5A2|PENK|TCF21|SCN11A|CCNB1|CRHBP|TF|LEF1|GPR37L1|SFRP1|SEMA3D|IFI6|EMX1|OR10A3|CHGA|EEF1A2|BMPR1B|EZH2|MYOG|IQGAP3|KLF15|GJB2|CPNE7|A…	http://amigo.geneontology.org/amigo/term/GO:0042221
cytoplasmic region	Gene Ontology	GO:0099568	2	29	0.285772	0.702003	SPEF1|GNAT3	http://amigo.geneontology.org/amigo/term/GO:0099568
positive chemotaxis	Gene Ontology	GO:0050918	2	29	0.285772	0.702003	FIGF|ANGPT1	http://amigo.geneontology.org/amigo/term/GO:0050918
regulation of mRNA catabolic process	Gene Ontology	GO:0061013	2	29	0.285772	0.702003	ZFP36|C6	http://amigo.geneontology.org/amigo/term/GO:0061013
regulation of histone modification	Gene Ontology	GO:0031056	2	29	0.285772	0.702003	HIST1H1B|DMRTC2	http://amigo.geneontology.org/amigo/term/GO:0031056
positive regulation of Wnt signaling pathway	Gene Ontology	GO:0030177	3	52	0.289296	0.702003	RSPO3|ASPM|FGF2	http://amigo.geneontology.org/amigo/term/GO:0030177
negative regulation of Wnt signaling pathway	Gene Ontology	GO:0030178	3	52	0.289296	0.702003	KREMEN2|GPC3|CTHRC1	http://amigo.geneontology.org/amigo/term/GO:0030178
regulation of extrinsic apoptotic signaling pathway	Gene Ontology	GO:2001236	4	76	0.291279	0.702003	IFI6|INHBA|ATF3|CAV1	http://amigo.geneontology.org/amigo/term/GO:2001236
negative regulation of intracellular steroid hormone receptor signaling pathway	Gene Ontology	GO:0033144	1	9	0.293306	0.702003	TCF21	http://amigo.geneontology.org/amigo/term/GO:0033144
negative regulation of DNA-dependent DNA replication	Gene Ontology	GO:2000104	1	9	0.293306	0.702003	PID1	http://amigo.geneontology.org/amigo/term/GO:2000104
catecholamine metabolic process	Gene Ontology	GO:0006584	1	9	0.293306	0.702003	MAOA	http://amigo.geneontology.org/amigo/term/GO:0006584
nucleobase-containing compound kinase activity	Gene Ontology	GO:0019205	1	9	0.293306	0.702003	TK1	http://amigo.geneontology.org/amigo/term/GO:0019205
phospholipase C activity	Gene Ontology	GO:0004629	1	9	0.293306	0.702003	ADCYAP1R1	http://amigo.geneontology.org/amigo/term/GO:0004629
negative regulation of phosphoprotein phosphatase activity	Gene Ontology	GO:0032515	1	9	0.293306	0.702003	ELFN2	http://amigo.geneontology.org/amigo/term/GO:0032515
membrane protein proteolysis	Gene Ontology	GO:0033619	1	9	0.293306	0.702003	GPLD1	http://amigo.geneontology.org/amigo/term/GO:0033619
positive regulation of signaling receptor activity	Gene Ontology	GO:2000273	1	9	0.293306	0.702003	RELN	http://amigo.geneontology.org/amigo/term/GO:2000273
cortical cytoskeleton organization	Gene Ontology	GO:0030865	1	9	0.293306	0.702003	VIL1	http://amigo.geneontology.org/amigo/term/GO:0030865
intrinsic component of mitochondrial membrane	Gene Ontology	GO:0098573	1	9	0.293306	0.702003	MGARP	http://amigo.geneontology.org/amigo/term/GO:0098573
protein trimerization	Gene Ontology	GO:0070206	1	9	0.293306	0.702003	OTC	http://amigo.geneontology.org/amigo/term/GO:0070206
positive regulation of dendrite morphogenesis	Gene Ontology	GO:0050775	1	9	0.293306	0.702003	RELN	http://amigo.geneontology.org/amigo/term/GO:0050775
mitotic sister chromatid separation	Gene Ontology	GO:0051306	1	9	0.293306	0.702003	ESPL1	http://amigo.geneontology.org/amigo/term/GO:0051306
regulation of icosanoid secretion	Gene Ontology	GO:0032303	1	9	0.293306	0.702003	NTSR1	http://amigo.geneontology.org/amigo/term/GO:0032303
positive regulation of fat cell differentiation	Gene Ontology	GO:0045600	1	9	0.293306	0.702003	HTR2A	http://amigo.geneontology.org/amigo/term/GO:0045600
negative regulation of intrinsic apoptotic signaling pathway in response to DNA damage by p53 class mediator	Gene Ontology	GO:1902166	1	9	0.293306	0.702003	MUC1	http://amigo.geneontology.org/amigo/term/GO:1902166
embryonic skeletal joint development	Gene Ontology	GO:0072498	1	9	0.293306	0.702003	COL2A1	http://amigo.geneontology.org/amigo/term/GO:0072498
regulation of protein kinase A signaling	Gene Ontology	GO:0010738	1	9	0.293306	0.702003	AKAP12	http://amigo.geneontology.org/amigo/term/GO:0010738
negative regulation of dendritic spine morphogenesis	Gene Ontology	GO:0061002	1	9	0.293306	0.702003	NLGN1	http://amigo.geneontology.org/amigo/term/GO:0061002
coronary vasculature development	Gene Ontology	GO:0060976	1	9	0.293306	0.702003	GPC3	http://amigo.geneontology.org/amigo/term/GO:0060976
cardioblast differentiation	Gene Ontology	GO:0010002	1	9	0.293306	0.702003	NRG1	http://amigo.geneontology.org/amigo/term/GO:0010002
substrate-dependent cell migration	Gene Ontology	GO:0006929	1	9	0.293306	0.702003	FN1	http://amigo.geneontology.org/amigo/term/GO:0006929
RNA polymerase II core promoter sequence-specific DNA binding	Gene Ontology	GO:0000979	1	9	0.293306	0.702003	SOX3	http://amigo.geneontology.org/amigo/term/GO:0000979
polyol biosynthetic process	Gene Ontology	GO:0046173	1	9	0.293306	0.702003	LEP	http://amigo.geneontology.org/amigo/term/GO:0046173
positive regulation of mesenchymal cell proliferation	Gene Ontology	GO:0002053	1	9	0.293306	0.702003	TP63	http://amigo.geneontology.org/amigo/term/GO:0002053
ADP metabolic process	Gene Ontology	GO:0046031	1	9	0.293306	0.702003	AK5	http://amigo.geneontology.org/amigo/term/GO:0046031
stereocilium bundle	Gene Ontology	GO:0032421	1	9	0.293306	0.702003	LHFPL5	http://amigo.geneontology.org/amigo/term/GO:0032421
phosphatidylinositol kinase activity	Gene Ontology	GO:0052742	1	9	0.293306	0.702003	FGF5	http://amigo.geneontology.org/amigo/term/GO:0052742
transforming growth factor beta1 production	Gene Ontology	GO:0032905	1	9	0.293306	0.702003	CX3CL1	http://amigo.geneontology.org/amigo/term/GO:0032905
response to dopamine	Gene Ontology	GO:1903350	1	9	0.293306	0.702003	RGS8	http://amigo.geneontology.org/amigo/term/GO:1903350
cellular response to vitamin D	Gene Ontology	GO:0071305	1	9	0.293306	0.702003	ADAMTS1	http://amigo.geneontology.org/amigo/term/GO:0071305
lymph vessel development	Gene Ontology	GO:0001945	1	9	0.293306	0.702003	PROX1	http://amigo.geneontology.org/amigo/term/GO:0001945
lumenal side of membrane	Gene Ontology	GO:0098576	1	9	0.293306	0.702003	SPPL2C	http://amigo.geneontology.org/amigo/term/GO:0098576
sperm ejaculation	Gene Ontology	GO:0042713	1	9	0.293306	0.702003	TACR1	http://amigo.geneontology.org/amigo/term/GO:0042713
response to axon injury	Gene Ontology	GO:0048678	1	9	0.293306	0.702003	CHL1	http://amigo.geneontology.org/amigo/term/GO:0048678
response to sterol	Gene Ontology	GO:0036314	1	9	0.293306	0.702003	TGFBR2	http://amigo.geneontology.org/amigo/term/GO:0036314
fatty acid alpha-oxidation	Gene Ontology	GO:0001561	1	9	0.293306	0.702003	HAO1	http://amigo.geneontology.org/amigo/term/GO:0001561
carnitine shuttle	Gene Ontology	GO:0006853	1	9	0.293306	0.702003	ACACB	http://amigo.geneontology.org/amigo/term/GO:0006853
ligand-activated transcription factor activity	Gene Ontology	GO:0098531	1	9	0.293306	0.702003	ESR2	http://amigo.geneontology.org/amigo/term/GO:0098531
cysteine-type endopeptidase inhibitor activity	Gene Ontology	GO:0004869	1	9	0.293306	0.702003	CST1	http://amigo.geneontology.org/amigo/term/GO:0004869
regulation of cardiac muscle cell differentiation	Gene Ontology	GO:2000725	1	9	0.293306	0.702003	DKK1	http://amigo.geneontology.org/amigo/term/GO:2000725
signal sequence binding	Gene Ontology	GO:0005048	1	9	0.293306	0.702003	KPNA2	http://amigo.geneontology.org/amigo/term/GO:0005048
actomyosin	Gene Ontology	GO:0042641	1	9	0.293306	0.702003	PGM5	http://amigo.geneontology.org/amigo/term/GO:0042641
mRNA 3'-UTR binding	Gene Ontology	GO:0003730	1	9	0.293306	0.702003	IGF2BP3	http://amigo.geneontology.org/amigo/term/GO:0003730
negative regulation of organic acid transport	Gene Ontology	GO:0032891	1	9	0.293306	0.702003	TRH	http://amigo.geneontology.org/amigo/term/GO:0032891
negative regulation of intracellular protein transport	Gene Ontology	GO:0090317	1	9	0.293306	0.702003	ANGPT1	http://amigo.geneontology.org/amigo/term/GO:0090317
sensory perception of sweet taste	Gene Ontology	GO:0050916	1	9	0.293306	0.702003	TAS1R3	http://amigo.geneontology.org/amigo/term/GO:0050916
establishment or maintenance of bipolar cell polarity	Gene Ontology	GO:0061245	1	9	0.293306	0.702003	LHX2	http://amigo.geneontology.org/amigo/term/GO:0061245
mitochondrial intermembrane space	Gene Ontology	GO:0005758	1	9	0.293306	0.702003	TXNIP	http://amigo.geneontology.org/amigo/term/GO:0005758
fibroblast migration	Gene Ontology	GO:0010761	1	9	0.293306	0.702003	UTS2	http://amigo.geneontology.org/amigo/term/GO:0010761
embryonic digestive tract development	Gene Ontology	GO:0048566	1	9	0.293306	0.702003	SOX11	http://amigo.geneontology.org/amigo/term/GO:0048566
aorta development	Gene Ontology	GO:0035904	1	9	0.293306	0.702003	PROX1	http://amigo.geneontology.org/amigo/term/GO:0035904
natural killer cell proliferation	Gene Ontology	GO:0001787	1	9	0.293306	0.702003	LEP	http://amigo.geneontology.org/amigo/term/GO:0001787
ionotropic glutamate receptor activity	Gene Ontology	GO:0004970	1	9	0.293306	0.702003	MAPK8IP2	http://amigo.geneontology.org/amigo/term/GO:0004970
endosome	Gene Ontology	GO:0005768	6	126	0.296058	0.708209	SLC2A4|SYT5|CRHBP|ADRB2|HSD17B6|KIFC1	http://amigo.geneontology.org/amigo/term/GO:0005768
regionalization	Gene Ontology	GO:0003002	8	177	0.29802	0.710629	LHX3|NTF4|HOXB1|EN1|HOXC13|NKX2-2|FGF2|NKX2-5	http://amigo.geneontology.org/amigo/term/GO:0003002
brown fat cell differentiation	Gene Ontology	GO:0050873	2	30	0.298512	0.710629	ADRB2|CEBPA	http://amigo.geneontology.org/amigo/term/GO:0050873
ERBB signaling pathway	Gene Ontology	GO:0038127	2	30	0.298512	0.710629	MYOC|PTK6	http://amigo.geneontology.org/amigo/term/GO:0038127
cellular response to hypoxia	Gene Ontology	GO:0071456	2	30	0.298512	0.710629	CCNB1|ANGPT4	http://amigo.geneontology.org/amigo/term/GO:0071456
cellular carbohydrate catabolic process	Gene Ontology	GO:0044275	2	30	0.298512	0.710629	MIOX|GYG2	http://amigo.geneontology.org/amigo/term/GO:0044275
atrial septum development	Gene Ontology	GO:0003283	2	30	0.298512	0.710629	GATA4|ANK2	http://amigo.geneontology.org/amigo/term/GO:0003283
lamellipodium	Gene Ontology	GO:0030027	2	30	0.298512	0.710629	MYLK|FGD3	http://amigo.geneontology.org/amigo/term/GO:0030027
regulation of intracellular protein transport	Gene Ontology	GO:0033157	4	77	0.29897	0.711337	NRG1|GPHA2|CEMIP|LRRC46	http://amigo.geneontology.org/amigo/term/GO:0033157
regulation of cellular biosynthetic process	Gene Ontology	GO:0031326	56	1467	0.300897	0.715537	HIST1H4A|VAX1|HIST1H4J|HOXC10|DMRT2|HIST1H2AM|RCOR2|FABP4|BMPER|HIST1H2AE|SIX3|KIT|ADIPOQ|CAV1|IFNL1|ADCYAP1R1|CCNA2|FEZF1|FEZF2|SOX11|EGR1|CDT1|IFNB1|HYPM|SOX2|GAL|HIST1H3J|RELN|ZIC1|HIST1H4E|HIST1H2AB|MAPK15|THRSP|SCX|TFR2|IGF1|AMH|RXRG|FOXD3|LIN28B|HIST1H3C|PAX7|GPAM|EBF3|TBX15|DMRTC2|ACO1|HIST1H3I|E2F1|POU4F1|INSM1|ITM2A|PDK4|MT3|HLF|PAK3	http://amigo.geneontology.org/amigo/term/GO:0031326
isomerase activity	Gene Ontology	GO:0016853	2	31	0.311214	0.732943	RPE65|PTGIS	http://amigo.geneontology.org/amigo/term/GO:0016853
regulation of chromatin organization	Gene Ontology	GO:1902275	2	31	0.311214	0.732943	CCNB1|HIST1H1B	http://amigo.geneontology.org/amigo/term/GO:1902275
catalytic activity, acting on DNA	Gene Ontology	GO:0140097	2	31	0.311214	0.732943	TERT|EXO1	http://amigo.geneontology.org/amigo/term/GO:0140097
regulation of signal transduction by p53 class mediator	Gene Ontology	GO:1901796	2	31	0.311214	0.732943	BRIP1|EXO1	http://amigo.geneontology.org/amigo/term/GO:1901796
renal system vasculature development	Gene Ontology	GO:0061437	2	31	0.311214	0.732943	HN1|TCF21	http://amigo.geneontology.org/amigo/term/GO:0061437
negative regulation of transcription, DNA-templated	Gene Ontology	GO:0045892	20	496	0.311782	0.732943	E2F7|WT1|ELANE|SFRP1|LHX1|PRDM13|E2F1|HIST1H4D|HIST1H4E|MUC1|SOX17|FOXD1|CDC45|SMYD1|LHX9|HIST1H2AE|HIST1H2AG|PITX1|PROX1|HES6	http://amigo.geneontology.org/amigo/term/GO:0045892
ionotropic glutamate receptor complex	Gene Ontology	GO:0008328	1	10	0.31742	0.732943	SHISA9	http://amigo.geneontology.org/amigo/term/GO:0008328
dopamine receptor signaling pathway	Gene Ontology	GO:0007212	1	10	0.31742	0.732943	HMP19	http://amigo.geneontology.org/amigo/term/GO:0007212
regulation of viral transcription	Gene Ontology	GO:0046782	1	10	0.31742	0.732943	HPN	http://amigo.geneontology.org/amigo/term/GO:0046782
positive regulation of response to wounding	Gene Ontology	GO:1903036	1	10	0.31742	0.732943	TGFBR2	http://amigo.geneontology.org/amigo/term/GO:1903036
interstrand cross-link repair	Gene Ontology	GO:0036297	1	10	0.31742	0.732943	EME1	http://amigo.geneontology.org/amigo/term/GO:0036297
endothelial cell development	Gene Ontology	GO:0001885	1	10	0.31742	0.732943	CLDN5	http://amigo.geneontology.org/amigo/term/GO:0001885
positive regulation of erythrocyte differentiation	Gene Ontology	GO:0045648	1	10	0.31742	0.732943	ISG15	http://amigo.geneontology.org/amigo/term/GO:0045648
regulation of memory T cell differentiation	Gene Ontology	GO:0043380	1	10	0.31742	0.732943	IFNL1	http://amigo.geneontology.org/amigo/term/GO:0043380
male genitalia development	Gene Ontology	GO:0030539	1	10	0.31742	0.732943	WT1	http://amigo.geneontology.org/amigo/term/GO:0030539
stress fiber	Gene Ontology	GO:0001725	1	10	0.31742	0.732943	SORBS1	http://amigo.geneontology.org/amigo/term/GO:0001725
Golgi cisterna	Gene Ontology	GO:0031985	1	10	0.31742	0.732943	HMP19	http://amigo.geneontology.org/amigo/term/GO:0031985
mitochondrial membrane organization	Gene Ontology	GO:0007006	1	10	0.31742	0.732943	TP63	http://amigo.geneontology.org/amigo/term/GO:0007006
negative regulation of amino acid transport	Gene Ontology	GO:0051956	1	10	0.31742	0.732943	LEP	http://amigo.geneontology.org/amigo/term/GO:0051956
axon extension involved in axon guidance	Gene Ontology	GO:0048846	1	10	0.31742	0.732943	SLIT3	http://amigo.geneontology.org/amigo/term/GO:0048846
planar cell polarity pathway involved in neural tube closure	Gene Ontology	GO:0090179	1	10	0.31742	0.732943	SFRP1	http://amigo.geneontology.org/amigo/term/GO:0090179
keratan sulfate biosynthetic process	Gene Ontology	GO:0018146	1	10	0.31742	0.732943	PRELP	http://amigo.geneontology.org/amigo/term/GO:0018146
epidermis morphogenesis	Gene Ontology	GO:0048730	1	10	0.31742	0.732943	TGM3	http://amigo.geneontology.org/amigo/term/GO:0048730
stress fiber assembly	Gene Ontology	GO:0043149	1	10	0.31742	0.732943	PPM1E	http://amigo.geneontology.org/amigo/term/GO:0043149
adenylate cyclase-activating G protein-coupled receptor signaling pathway	Gene Ontology	GO:0007189	1	10	0.31742	0.732943	PTH1R	http://amigo.geneontology.org/amigo/term/GO:0007189
metalloexopeptidase activity	Gene Ontology	GO:0008235	1	10	0.31742	0.732943	DPEP1	http://amigo.geneontology.org/amigo/term/GO:0008235
photoreceptor inner segment	Gene Ontology	GO:0001917	1	10	0.31742	0.732943	GNGT1	http://amigo.geneontology.org/amigo/term/GO:0001917
chorio-allantoic fusion	Gene Ontology	GO:0060710	1	10	0.31742	0.732943	LEF1	http://amigo.geneontology.org/amigo/term/GO:0060710
anterograde axonal transport	Gene Ontology	GO:0008089	1	10	0.31742	0.732943	KIF1A	http://amigo.geneontology.org/amigo/term/GO:0008089
protein kinase inhibitor activity	Gene Ontology	GO:0004860	1	10	0.31742	0.732943	CDKN2A	http://amigo.geneontology.org/amigo/term/GO:0004860
regulation of phospholipid metabolic process	Gene Ontology	GO:1903725	1	10	0.31742	0.732943	FGF2	http://amigo.geneontology.org/amigo/term/GO:1903725
nicotinamide nucleotide metabolic process	Gene Ontology	GO:0046496	1	10	0.31742	0.732943	NMRK2	http://amigo.geneontology.org/amigo/term/GO:0046496
positive regulation of stem cell differentiation	Gene Ontology	GO:2000738	1	10	0.31742	0.732943	NKX2-5	http://amigo.geneontology.org/amigo/term/GO:2000738
peptidyl-cysteine modification	Gene Ontology	GO:0018198	1	10	0.31742	0.732943	DMD	http://amigo.geneontology.org/amigo/term/GO:0018198
pericardium development	Gene Ontology	GO:0060039	1	10	0.31742	0.732943	WT1	http://amigo.geneontology.org/amigo/term/GO:0060039
regulation of filopodium assembly	Gene Ontology	GO:0051489	1	10	0.31742	0.732943	NEURL1	http://amigo.geneontology.org/amigo/term/GO:0051489
negative regulation of interleukin-1 secretion	Gene Ontology	GO:0050711	1	10	0.31742	0.732943	APOA1	http://amigo.geneontology.org/amigo/term/GO:0050711
response to lead ion	Gene Ontology	GO:0010288	1	10	0.31742	0.732943	CAT	http://amigo.geneontology.org/amigo/term/GO:0010288
positive regulation of transforming growth factor beta1 production	Gene Ontology	GO:0032914	1	10	0.31742	0.732943	SERPINB7	http://amigo.geneontology.org/amigo/term/GO:0032914
regulation of odontogenesis	Gene Ontology	GO:0042481	1	10	0.31742	0.732943	KLF14	http://amigo.geneontology.org/amigo/term/GO:0042481
single-stranded DNA binding	Gene Ontology	GO:0003697	1	10	0.31742	0.732943	NEIL3	http://amigo.geneontology.org/amigo/term/GO:0003697
methylated histone binding	Gene Ontology	GO:0035064	1	10	0.31742	0.732943	CBX2	http://amigo.geneontology.org/amigo/term/GO:0035064
regulation of hepatocyte proliferation	Gene Ontology	GO:2000345	1	10	0.31742	0.732943	PTN	http://amigo.geneontology.org/amigo/term/GO:2000345
regulation of tumor necrosis factor-mediated signaling pathway	Gene Ontology	GO:0010803	1	10	0.31742	0.732943	APOA1	http://amigo.geneontology.org/amigo/term/GO:0010803
positive regulation of Ras protein signal transduction	Gene Ontology	GO:0046579	1	10	0.31742	0.732943	ABRA	http://amigo.geneontology.org/amigo/term/GO:0046579
serine/threonine protein kinase complex	Gene Ontology	GO:1902554	1	10	0.31742	0.732943	HOXC10	http://amigo.geneontology.org/amigo/term/GO:1902554
response to magnetism	Gene Ontology	GO:0071000	1	10	0.31742	0.732943	MYOG	http://amigo.geneontology.org/amigo/term/GO:0071000
water transport	Gene Ontology	GO:0006833	1	10	0.31742	0.732943	AQP7	http://amigo.geneontology.org/amigo/term/GO:0006833
clathrin-coated vesicle membrane	Gene Ontology	GO:0030665	1	10	0.31742	0.732943	SLC18A1	http://amigo.geneontology.org/amigo/term/GO:0030665
atrial septum morphogenesis	Gene Ontology	GO:0060413	1	10	0.31742	0.732943	TBX20	http://amigo.geneontology.org/amigo/term/GO:0060413
modification by host of symbiont morphology or physiology	Gene Ontology	GO:0051851	1	10	0.31742	0.732943	LEF1	http://amigo.geneontology.org/amigo/term/GO:0051851
establishment of mitotic spindle orientation	Gene Ontology	GO:0000132	1	10	0.31742	0.732943	SPRY2	http://amigo.geneontology.org/amigo/term/GO:0000132
anterior commissure morphogenesis	Gene Ontology	GO:0021960	1	10	0.31742	0.732943	PLXNA4	http://amigo.geneontology.org/amigo/term/GO:0021960
adenyl ribonucleotide binding	Gene Ontology	GO:0032559	11	259	0.317471	0.732943	MKI67|PNCK|ACACB|DDR2|OASL|AK5|CNGA2|PIK3C2G|ATP1A2|UBE2S|PYGM	http://amigo.geneontology.org/amigo/term/GO:0032559
sulfur compound metabolic process	Gene Ontology	GO:0006790	8	182	0.323184	0.745744	DGAT2|GSTA3|CHST9|OGN|BHMT2|SPOCK3|ANGPT1|DPEP1	http://amigo.geneontology.org/amigo/term/GO:0006790
magnesium ion binding	Gene Ontology	GO:0000287	2	32	0.323867	0.746156	PGM5|SIK2	http://amigo.geneontology.org/amigo/term/GO:0000287
regulation of actin filament depolymerization	Gene Ontology	GO:0030834	2	32	0.323867	0.746156	CFL2|SPTBN1	http://amigo.geneontology.org/amigo/term/GO:0030834
phosphatase binding	Gene Ontology	GO:0019902	2	32	0.323867	0.746156	TPRN|ELFN2	http://amigo.geneontology.org/amigo/term/GO:0019902
ubiquitin-like protein transferase activity	Gene Ontology	GO:0019787	4	81	0.329935	0.759346	KLHL33|KLHL29|UBE2T|FBXO40	http://amigo.geneontology.org/amigo/term/GO:0019787
GTPase activity	Gene Ontology	GO:0003924	7	158	0.33326	0.762007	DENND2A|FGD3|NTRK2|KIT|RET|CCL23|FGFR3	http://amigo.geneontology.org/amigo/term/GO:0003924
regulation of catabolic process	Gene Ontology	GO:0009894	8	184	0.333357	0.762007	TIMP4|BRSK2|HCAR2|ZFP36|AADAC|IL33|ABCD2|CIDEA	http://amigo.geneontology.org/amigo/term/GO:0009894
rhythmic process	Gene Ontology	GO:0048511	3	57	0.336253	0.762007	LHCGR|NPY2R|F7	http://amigo.geneontology.org/amigo/term/GO:0048511
cell cycle arrest	Gene Ontology	GO:0007050	3	57	0.336253	0.762007	SOX2|INHBA|MUC1	http://amigo.geneontology.org/amigo/term/GO:0007050
respiratory tube development	Gene Ontology	GO:0030323	3	57	0.336253	0.762007	HLF|HOXA5|TGFBR2	http://amigo.geneontology.org/amigo/term/GO:0030323
RNA polymerase II-specific DNA-binding transcription factor binding	Gene Ontology	GO:0061629	3	57	0.336253	0.762007	LEF1|KLF4|ARNT2	http://amigo.geneontology.org/amigo/term/GO:0061629
transferase activity, transferring acyl groups	Gene Ontology	GO:0016746	2	33	0.336459	0.762007	TGM3|EPB42	http://amigo.geneontology.org/amigo/term/GO:0016746
insulin receptor signaling pathway	Gene Ontology	GO:0008286	2	33	0.336459	0.762007	RPE65|SIK2	http://amigo.geneontology.org/amigo/term/GO:0008286
negative regulation of endothelial cell proliferation	Gene Ontology	GO:0001937	2	33	0.336459	0.762007	TNMD|CAV2	http://amigo.geneontology.org/amigo/term/GO:0001937
Rho protein signal transduction	Gene Ontology	GO:0007266	2	33	0.336459	0.762007	APOC3|ABRA	http://amigo.geneontology.org/amigo/term/GO:0007266
transferase complex, transferring phosphorus-containing groups	Gene Ontology	GO:0061695	2	33	0.336459	0.762007	PYDC1|CDK5R2	http://amigo.geneontology.org/amigo/term/GO:0061695
endothelial cell differentiation	Gene Ontology	GO:0045446	2	33	0.336459	0.762007	NRG1|CLDN5	http://amigo.geneontology.org/amigo/term/GO:0045446
cellular response to insulin stimulus	Gene Ontology	GO:0032869	2	33	0.336459	0.762007	RPE65|GPAM	http://amigo.geneontology.org/amigo/term/GO:0032869
organelle inner membrane	Gene Ontology	GO:0019866	4	82	0.337708	0.762007	TYMS|LMNB1|PDK4|ABCA9	http://amigo.geneontology.org/amigo/term/GO:0019866
mitochondrial transport	Gene Ontology	GO:0006839	6	133	0.338061	0.762007	TP63|IFNL3|E2F1|MGARP|ACACB|PDE2A	http://amigo.geneontology.org/amigo/term/GO:0006839
glutathione derivative metabolic process	Gene Ontology	GO:1901685	1	11	0.340713	0.762007	GSTM5	http://amigo.geneontology.org/amigo/term/GO:1901685
cell differentiation involved in embryonic placenta development	Gene Ontology	GO:0060706	1	11	0.340713	0.762007	ASCL2	http://amigo.geneontology.org/amigo/term/GO:0060706
inner ear receptor cell differentiation	Gene Ontology	GO:0060113	1	11	0.340713	0.762007	CTHRC1	http://amigo.geneontology.org/amigo/term/GO:0060113
inflammatory cell apoptotic process	Gene Ontology	GO:0006925	1	11	0.340713	0.762007	ANXA1	http://amigo.geneontology.org/amigo/term/GO:0006925
post-Golgi vesicle-mediated transport	Gene Ontology	GO:0006892	1	11	0.340713	0.762007	PKDCC	http://amigo.geneontology.org/amigo/term/GO:0006892
positive regulation of ubiquitin-dependent protein catabolic process	Gene Ontology	GO:2000060	1	11	0.340713	0.762007	IL33	http://amigo.geneontology.org/amigo/term/GO:2000060
positive regulation of muscle contraction	Gene Ontology	GO:0045933	1	11	0.340713	0.762007	EDN2	http://amigo.geneontology.org/amigo/term/GO:0045933
SMAD binding	Gene Ontology	GO:0046332	1	11	0.340713	0.762007	BMP2	http://amigo.geneontology.org/amigo/term/GO:0046332
transferase activity, transferring sulfur-containing groups	Gene Ontology	GO:0016782	1	11	0.340713	0.762007	HS3ST5	http://amigo.geneontology.org/amigo/term/GO:0016782
protein kinase activator activity	Gene Ontology	GO:0030295	1	11	0.340713	0.762007	MAPK8IP2	http://amigo.geneontology.org/amigo/term/GO:0030295
Cajal body	Gene Ontology	GO:0015030	1	11	0.340713	0.762007	HSPB7	http://amigo.geneontology.org/amigo/term/GO:0015030
neural tube patterning	Gene Ontology	GO:0021532	1	11	0.340713	0.762007	GBX2	http://amigo.geneontology.org/amigo/term/GO:0021532
regulation of gene silencing by RNA	Gene Ontology	GO:0060966	1	11	0.340713	0.762007	LIN28A	http://amigo.geneontology.org/amigo/term/GO:0060966
neuroepithelial cell differentiation	Gene Ontology	GO:0060563	1	11	0.340713	0.762007	LEF1	http://amigo.geneontology.org/amigo/term/GO:0060563
phosphatidylinositol bisphosphate kinase activity	Gene Ontology	GO:0052813	1	11	0.340713	0.762007	NRG1	http://amigo.geneontology.org/amigo/term/GO:0052813
DNA-dependent ATPase activity	Gene Ontology	GO:0008094	1	11	0.340713	0.762007	TOP2A	http://amigo.geneontology.org/amigo/term/GO:0008094
cytoplasmic microtubule	Gene Ontology	GO:0005881	1	11	0.340713	0.762007	GTSE1	http://amigo.geneontology.org/amigo/term/GO:0005881
regulation of skeletal muscle tissue growth	Gene Ontology	GO:0048631	1	11	0.340713	0.762007	ADRB2	http://amigo.geneontology.org/amigo/term/GO:0048631
angiogenesis involved in coronary vascular morphogenesis	Gene Ontology	GO:0060978	1	11	0.340713	0.762007	FGF2	http://amigo.geneontology.org/amigo/term/GO:0060978
ammonium ion binding	Gene Ontology	GO:0070405	1	11	0.340713	0.762007	CHRNA4	http://amigo.geneontology.org/amigo/term/GO:0070405
regulation of receptor recycling	Gene Ontology	GO:0001919	1	11	0.340713	0.762007	D4S234E	http://amigo.geneontology.org/amigo/term/GO:0001919
neutral amino acid transport	Gene Ontology	GO:0015804	1	11	0.340713	0.762007	SLC6A19	http://amigo.geneontology.org/amigo/term/GO:0015804
response to lipoprotein particle	Gene Ontology	GO:0055094	1	11	0.340713	0.762007	CD36	http://amigo.geneontology.org/amigo/term/GO:0055094
histone H3-S10 phosphorylation	Gene Ontology	GO:0043987	1	11	0.340713	0.762007	CCNB1	http://amigo.geneontology.org/amigo/term/GO:0043987
membrane raft organization	Gene Ontology	GO:0031579	1	11	0.340713	0.762007	GSN	http://amigo.geneontology.org/amigo/term/GO:0031579
phosphorus-oxygen lyase activity	Gene Ontology	GO:0016849	1	11	0.340713	0.762007	RUNDC3A	http://amigo.geneontology.org/amigo/term/GO:0016849
oligosaccharide metabolic process	Gene Ontology	GO:0009311	1	11	0.340713	0.762007	B3GALT1	http://amigo.geneontology.org/amigo/term/GO:0009311
production of miRNAs involved in gene silencing by miRNA	Gene Ontology	GO:0035196	1	11	0.340713	0.762007	LIN28A	http://amigo.geneontology.org/amigo/term/GO:0035196
angiotensin-activated signaling pathway	Gene Ontology	GO:0038166	1	11	0.340713	0.762007	MAS1	http://amigo.geneontology.org/amigo/term/GO:0038166
ceramide metabolic process	Gene Ontology	GO:0006672	1	11	0.340713	0.762007	NEU4	http://amigo.geneontology.org/amigo/term/GO:0006672
negative regulation of muscle organ development	Gene Ontology	GO:0048635	1	11	0.340713	0.762007	MYOCD	http://amigo.geneontology.org/amigo/term/GO:0048635
intrinsic apoptotic signaling pathway in response to DNA damage by p53 class mediator	Gene Ontology	GO:0042771	1	11	0.340713	0.762007	MUC1	http://amigo.geneontology.org/amigo/term/GO:0042771
protein K11-linked ubiquitination	Gene Ontology	GO:0070979	1	11	0.340713	0.762007	UBE2S	http://amigo.geneontology.org/amigo/term/GO:0070979
positive regulation of focal adhesion assembly	Gene Ontology	GO:0051894	1	11	0.340713	0.762007	SFRP1	http://amigo.geneontology.org/amigo/term/GO:0051894
heterochromatin	Gene Ontology	GO:0000792	1	11	0.340713	0.762007	SALL4	http://amigo.geneontology.org/amigo/term/GO:0000792
iron-sulfur cluster binding	Gene Ontology	GO:0051536	1	11	0.340713	0.762007	ACO1	http://amigo.geneontology.org/amigo/term/GO:0051536
regulation of apoptotic process involved in morphogenesis	Gene Ontology	GO:1902337	1	11	0.340713	0.762007	PAX2	http://amigo.geneontology.org/amigo/term/GO:1902337
negative regulation of alpha-beta T cell differentiation	Gene Ontology	GO:0046639	1	11	0.340713	0.762007	FOXP3	http://amigo.geneontology.org/amigo/term/GO:0046639
positive regulation of animal organ morphogenesis	Gene Ontology	GO:0110110	1	11	0.340713	0.762007	WT1	http://amigo.geneontology.org/amigo/term/GO:0110110
appendage morphogenesis	Gene Ontology	GO:0035107	7	160	0.344313	0.769672	TP63|CRABP2|SOX11|DKK1|EN1|BMPR1B|GPC3	http://amigo.geneontology.org/amigo/term/GO:0035107
regulation of protein catabolic process	Gene Ontology	GO:0042176	4	83	0.345489	0.771093	MAPK15|GPLD1|AURKA|SOX17	http://amigo.geneontology.org/amigo/term/GO:0042176
phospholipid binding	Gene Ontology	GO:0005543	3	58	0.345644	0.771093	SYT4|TRIM72|SYT5	http://amigo.geneontology.org/amigo/term/GO:0005543
cell-substrate adherens junction	Gene Ontology	GO:0005924	3	58	0.345644	0.771093	ADAM18|CAV2|KIF23	http://amigo.geneontology.org/amigo/term/GO:0005924
signal transduction in response to DNA damage	Gene Ontology	GO:0042770	3	58	0.345644	0.771093	E2F7|AURKA|E2F1	http://amigo.geneontology.org/amigo/term/GO:0042770
cellular developmental process	Gene Ontology	GO:0048869	71	1908	0.34781	0.775535	KRT75|PTH1R|ACTN2|HMX2|TRIM72|NGB|ADIPOQ|CD34|KRT3|IL20|BMPR1B|EPHB1|BMPER|SCRT2|MYOC|APCDD1|E2F8|ADAM8|SPTBN1|IFNL1|LHX2|ADCYAP1R1|FZD4|DMRTA2|COL1A1|DRP2|LHX9|UPK1A|IGSF10|IFNB1|ITPKA|EN1|FHL1|HTR2A|SGCZ|CX3CL1|SCT|FAM57B|DPYSL5|FBXO40|FGD3|SIM2|LMX1A|POSTN|ASCL1|FBN2|PGLYRP2|ASZ1|ADAMTS1|CPLX2|MAST1|DNASE1L3|MYH6|APOB|HORMAD1|CTNNA2|CAPZA3|CCL11|ETV7|E2F1|CXCL17|SH3D19|AGR2|TLX2|CDC20|CDK1|GPL…	http://amigo.geneontology.org/amigo/term/GO:0048869
detection of chemical stimulus involved in sensory perception of bitter taste	Gene Ontology	GO:0001580	2	34	0.348978	0.776967	PIGR|CST1	http://amigo.geneontology.org/amigo/term/GO:0001580
transport vesicle membrane	Gene Ontology	GO:0030658	2	34	0.348978	0.776967	SYT9|SYT4	http://amigo.geneontology.org/amigo/term/GO:0030658
protein localization to organelle	Gene Ontology	GO:0033365	7	161	0.349856	0.778531	GFY|E2F1|BUB1B|CFD|HTR2A|COL1A1|FAM83D	http://amigo.geneontology.org/amigo/term/GO:0033365
epithelial cell differentiation	Gene Ontology	GO:0030855	16	402	0.355091	0.789387	CYP26B1|TGM3|TMOD1|BMP2|PROX1|ONECUT2|CLDN5|CES1|CASP14|NKX3-2|PDX1|GATA4|CCNO|PROC|S100A7|HOXB13	http://amigo.geneontology.org/amigo/term/GO:0030855
limb development	Gene Ontology	GO:0060173	5	110	0.355918	0.79083	CYP26B1|EN1|HN1|TP63|ALX4	http://amigo.geneontology.org/amigo/term/GO:0060173
cellular response to cAMP	Gene Ontology	GO:0071320	2	35	0.361417	0.791178	HCN2|SLC5A5	http://amigo.geneontology.org/amigo/term/GO:0071320
positive regulation of epithelial cell migration	Gene Ontology	GO:0010634	2	35	0.361417	0.791178	PROX1|TACR1	http://amigo.geneontology.org/amigo/term/GO:0010634
gland morphogenesis	Gene Ontology	GO:0022612	2	35	0.361417	0.791178	IL6|CAV3	http://amigo.geneontology.org/amigo/term/GO:0022612
roof of mouth development	Gene Ontology	GO:0060021	2	35	0.361417	0.791178	DLX5|MEOX2	http://amigo.geneontology.org/amigo/term/GO:0060021
response to temperature stimulus	Gene Ontology	GO:0009266	2	35	0.361417	0.791178	CXCL10|PCSK1N	http://amigo.geneontology.org/amigo/term/GO:0009266
erythrocyte differentiation	Gene Ontology	GO:0030218	2	35	0.361417	0.791178	EPB42|ISG15	http://amigo.geneontology.org/amigo/term/GO:0030218
regulation of protein targeting to mitochondrion	Gene Ontology	GO:1903214	1	12	0.36321	0.791178	GPHA2	http://amigo.geneontology.org/amigo/term/GO:1903214
smooth muscle cell differentiation	Gene Ontology	GO:0051145	1	12	0.36321	0.791178	MYOCD	http://amigo.geneontology.org/amigo/term/GO:0051145
epithelial cell apoptotic process	Gene Ontology	GO:1904019	1	12	0.36321	0.791178	IGF1	http://amigo.geneontology.org/amigo/term/GO:1904019
endochondral bone morphogenesis	Gene Ontology	GO:0060350	1	12	0.36321	0.791178	COL1A1	http://amigo.geneontology.org/amigo/term/GO:0060350
mitochondrial transmembrane transport	Gene Ontology	GO:1990542	1	12	0.36321	0.791178	ACACB	http://amigo.geneontology.org/amigo/term/GO:1990542
hexose catabolic process	Gene Ontology	GO:0019320	1	12	0.36321	0.791178	ALDH1A1	http://amigo.geneontology.org/amigo/term/GO:0019320
cell death in response to oxidative stress	Gene Ontology	GO:0036473	1	12	0.36321	0.791178	PYCR1	http://amigo.geneontology.org/amigo/term/GO:0036473
response to arsenic-containing substance	Gene Ontology	GO:0046685	1	12	0.36321	0.791178	ATF3	http://amigo.geneontology.org/amigo/term/GO:0046685
transport of virus	Gene Ontology	GO:0046794	1	12	0.36321	0.791178	TRIM15	http://amigo.geneontology.org/amigo/term/GO:0046794
regulation of bone mineralization	Gene Ontology	GO:0030500	1	12	0.36321	0.791178	ADRB2	http://amigo.geneontology.org/amigo/term/GO:0030500
negative regulation of lipid storage	Gene Ontology	GO:0010888	1	12	0.36321	0.791178	IL6	http://amigo.geneontology.org/amigo/term/GO:0010888
low-density lipoprotein particle mediated signaling	Gene Ontology	GO:0055096	1	12	0.36321	0.791178	CD36	http://amigo.geneontology.org/amigo/term/GO:0055096
cofactor transport	Gene Ontology	GO:0051181	1	12	0.36321	0.791178	SLC16A12	http://amigo.geneontology.org/amigo/term/GO:0051181
chromatin DNA binding	Gene Ontology	GO:0031490	1	12	0.36321	0.791178	MYOG	http://amigo.geneontology.org/amigo/term/GO:0031490
filopodium assembly	Gene Ontology	GO:0046847	1	12	0.36321	0.791178	FGD3	http://amigo.geneontology.org/amigo/term/GO:0046847
striated muscle cell proliferation	Gene Ontology	GO:0014855	1	12	0.36321	0.791178	RBP4	http://amigo.geneontology.org/amigo/term/GO:0014855
negative regulation of DNA binding	Gene Ontology	GO:0043392	1	12	0.36321	0.791178	NEK2	http://amigo.geneontology.org/amigo/term/GO:0043392
positive regulation of protein processing	Gene Ontology	GO:0010954	1	12	0.36321	0.791178	GSN	http://amigo.geneontology.org/amigo/term/GO:0010954
regulation of reactive oxygen species biosynthetic process	Gene Ontology	GO:1903426	1	12	0.36321	0.791178	KLF4	http://amigo.geneontology.org/amigo/term/GO:1903426
kinase activator activity	Gene Ontology	GO:0019209	1	12	0.36321	0.791178	MT3	http://amigo.geneontology.org/amigo/term/GO:0019209
positive regulation of ryanodine-sensitive calcium-release channel activity	Gene Ontology	GO:0060316	1	12	0.36321	0.791178	AKAP6	http://amigo.geneontology.org/amigo/term/GO:0060316
lysosomal lumen	Gene Ontology	GO:0043202	1	12	0.36321	0.791178	GPC3	http://amigo.geneontology.org/amigo/term/GO:0043202
double-strand break repair via nonhomologous end joining	Gene Ontology	GO:0006303	1	12	0.36321	0.791178	HIST2H4A	http://amigo.geneontology.org/amigo/term/GO:0006303
ureteric bud development	Gene Ontology	GO:0001657	1	12	0.36321	0.791178	BMPER	http://amigo.geneontology.org/amigo/term/GO:0001657
positive regulation of cell-cell adhesion mediated by integrin	Gene Ontology	GO:0033634	1	12	0.36321	0.791178	CXCL13	http://amigo.geneontology.org/amigo/term/GO:0033634
MAP kinase kinase activity	Gene Ontology	GO:0004708	1	12	0.36321	0.791178	FGF2	http://amigo.geneontology.org/amigo/term/GO:0004708
neutrophil homeostasis	Gene Ontology	GO:0001780	1	12	0.36321	0.791178	HCAR2	http://amigo.geneontology.org/amigo/term/GO:0001780
single stranded viral RNA replication via double stranded DNA intermediate	Gene Ontology	GO:0039692	1	12	0.36321	0.791178	TOP2A	http://amigo.geneontology.org/amigo/term/GO:0039692
inclusion body	Gene Ontology	GO:0016234	1	12	0.36321	0.791178	MIOX	http://amigo.geneontology.org/amigo/term/GO:0016234
oxidoreductase activity, acting on the CH-CH group of donors	Gene Ontology	GO:0016627	1	12	0.36321	0.791178	ACADL	http://amigo.geneontology.org/amigo/term/GO:0016627
microtubule associated complex	Gene Ontology	GO:0005875	1	12	0.36321	0.791178	KIF4A	http://amigo.geneontology.org/amigo/term/GO:0005875
lipid droplet	Gene Ontology	GO:0005811	1	12	0.36321	0.791178	FABP4	http://amigo.geneontology.org/amigo/term/GO:0005811
prostaglandin secretion	Gene Ontology	GO:0032310	1	12	0.36321	0.791178	LEP	http://amigo.geneontology.org/amigo/term/GO:0032310
cellular detoxification	Gene Ontology	GO:1990748	1	12	0.36321	0.791178	SOD3	http://amigo.geneontology.org/amigo/term/GO:1990748
cilium	Gene Ontology	GO:0005929	3	60	0.364384	0.793345	TUBB4A|PRKAR2B|ESR2	http://amigo.geneontology.org/amigo/term/GO:0005929
negative regulation of biosynthetic process	Gene Ontology	GO:0009890	36	952	0.366738	0.798078	FOXP3|HIST1H4A|ISX|SSX1|PLK1|TBX20|FOXG1|CD34|HIST1H1D|MYOCD|SOX2|HIST1H2AD|HIST1H2AG|MAGEA1|HIST1H2AB|EGR1|ZFP36|SOX17|HIST1H4J|NRG1|TCF21|WT1|MLXIPL|CENPF|SLC24A5|SALL4|PAX2|HIST1H3J|HIST2H2AB|ESR2|E2F8|RIPPLY3|PID1|PDX1|HIST3H2A|HIST1H2AH	http://amigo.geneontology.org/amigo/term/GO:0009890
negative regulation of cell cycle	Gene Ontology	GO:0045786	10	244	0.367767	0.799926	MAD2L1|BMP2|STRA8|USP44|NAT1|INHBA|ZWINT|CDC45|BRIP1|BIRC5	http://amigo.geneontology.org/amigo/term/GO:0045786
regulation of phosphorylation	Gene Ontology	GO:0042325	28	733	0.368338	0.800623	CCL7|GHR|EPHA8|PLK1|FOXM1|MYOCD|MYOC|CAV2|CAV3|FAM83D|CCKBR|TPX2|CD80|RELN|GRM4|GDF15|ANGPT1|EPHB1|BMP8A|CCL11|CDC25A|FGF4|GPR37L1|F2|PROK1|PFKFB1|MMP9|ATF3	http://amigo.geneontology.org/amigo/term/GO:0042325
keratinocyte differentiation	Gene Ontology	GO:0030216	6	138	0.368449	0.800623	HN1|TP63|CYP26B1|KRT2|CDSN|SCT	http://amigo.geneontology.org/amigo/term/GO:0030216
regulation of translation	Gene Ontology	GO:0006417	4	86	0.368835	0.801068	IGF2BP1|PER1|DAZL|EIF4E1B	http://amigo.geneontology.org/amigo/term/GO:0006417
cellular response to stress	Gene Ontology	GO:0033554	26	679	0.370431	0.804141	HIST1H4A|GFRAL|CASP12|FOXM1|CHL1|BRIP1|RAD54L|GJB2|DHRS2|RAD51AP1|GFAP|TOP2A|ANXA1|CDKN2A|RAD51|PPARG|NPHS1|RAD21L1|PBK|ADAM8|CDK1|CREB3L1|NEIL3|PDX1|EME1|UBE2T	http://amigo.geneontology.org/amigo/term/GO:0033554
cellular component assembly	Gene Ontology	GO:0022607	35	927	0.372567	0.807426	HIST1H4A|TRIM72|HIST1H4E|HIST1H4K|TBX20|CLDN19|CD34|CXCL13|HIST1H2BB|LRRC24|KIF11|CAV2|APOA1|NKX2-5|HIST1H3I|HJURP|SCARA5|HIST1H2BI|VIL1|LRRTM2|CCL21|SYNDIG1|HMP19|CAPS|HIST2H3D|HIST1H3F|CASC5|HIST1H3J|CADPS|HORMAD1|PROX1|CCL11|C1QTNF6|LRTM2|SLC1A1	http://amigo.geneontology.org/amigo/term/GO:0022607
guanyl ribonucleotide binding	Gene Ontology	GO:0032561	3	61	0.373723	0.807426	EEF1A2|PCK1|GNAI1	http://amigo.geneontology.org/amigo/term/GO:0032561
organelle subcompartment	Gene Ontology	GO:0031984	3	61	0.373723	0.807426	PCSK1N|SLC24A5|GAL3ST2	http://amigo.geneontology.org/amigo/term/GO:0031984
regulation of organ growth	Gene Ontology	GO:0046620	2	36	0.373764	0.807426	TGFBR2|CAV3	http://amigo.geneontology.org/amigo/term/GO:0046620
positive regulation of autophagy	Gene Ontology	GO:0010508	2	36	0.373764	0.807426	GABRA5|MYH11	http://amigo.geneontology.org/amigo/term/GO:0010508
phospholipase activity	Gene Ontology	GO:0004620	2	36	0.373764	0.807426	SNCB|PAFAH1B3	http://amigo.geneontology.org/amigo/term/GO:0004620
internal peptidyl-lysine acetylation	Gene Ontology	GO:0018393	2	36	0.373764	0.807426	FOXP3|LEF1	http://amigo.geneontology.org/amigo/term/GO:0018393
ubiquitin ligase complex	Gene Ontology	GO:0000151	2	36	0.373764	0.807426	KLHL38|KLHL31	http://amigo.geneontology.org/amigo/term/GO:0000151
mammary gland development	Gene Ontology	GO:0030879	2	36	0.373764	0.807426	NRG1|CAV1	http://amigo.geneontology.org/amigo/term/GO:0030879
low-density lipoprotein particle clearance	Gene Ontology	GO:0034383	2	36	0.373764	0.807426	APOB|CD36	http://amigo.geneontology.org/amigo/term/GO:0034383
mitochondrial inner membrane	Gene Ontology	GO:0005743	4	87	0.376608	0.813173	MYOC|ABCA9|ABCA8|RHBDL1	http://amigo.geneontology.org/amigo/term/GO:0005743
response to auditory stimulus	Gene Ontology	GO:0010996	3	62	0.383033	0.818341	SLITRK6|CXCL10|NTRK2	http://amigo.geneontology.org/amigo/term/GO:0010996
positive regulation of histone modification	Gene Ontology	GO:0031058	1	13	0.384941	0.818341	CCNB1	http://amigo.geneontology.org/amigo/term/GO:0031058
nuclear-transcribed mRNA catabolic process, deadenylation-dependent decay	Gene Ontology	GO:0000288	1	13	0.384941	0.818341	ZFP36	http://amigo.geneontology.org/amigo/term/GO:0000288
developmental pigmentation	Gene Ontology	GO:0048066	1	13	0.384941	0.818341	EDN3	http://amigo.geneontology.org/amigo/term/GO:0048066
phosphatidylinositol-4,5-bisphosphate 3-kinase activity	Gene Ontology	GO:0046934	1	13	0.384941	0.818341	KLB	http://amigo.geneontology.org/amigo/term/GO:0046934
transferase activity, transferring pentosyl groups	Gene Ontology	GO:0016763	1	13	0.384941	0.818341	ART3	http://amigo.geneontology.org/amigo/term/GO:0016763
regulation of long-term synaptic depression	Gene Ontology	GO:1900452	1	13	0.384941	0.818341	SORCS3	http://amigo.geneontology.org/amigo/term/GO:1900452
regulation of smooth muscle cell differentiation	Gene Ontology	GO:0051150	1	13	0.384941	0.818341	KIT	http://amigo.geneontology.org/amigo/term/GO:0051150
nephric duct development	Gene Ontology	GO:0072176	1	13	0.384941	0.818341	GPC3	http://amigo.geneontology.org/amigo/term/GO:0072176
miRNA metabolic process	Gene Ontology	GO:0010586	1	13	0.384941	0.818341	LIN28A	http://amigo.geneontology.org/amigo/term/GO:0010586
oxidoreductase activity, acting on NAD(P)H	Gene Ontology	GO:0016651	1	13	0.384941	0.818341	MIOX	http://amigo.geneontology.org/amigo/term/GO:0016651
negative regulation of stress-activated MAPK cascade	Gene Ontology	GO:0032873	1	13	0.384941	0.818341	PER1	http://amigo.geneontology.org/amigo/term/GO:0032873
multicellular organism aging	Gene Ontology	GO:0010259	1	13	0.384941	0.818341	TP63	http://amigo.geneontology.org/amigo/term/GO:0010259
toll-like receptor 3 signaling pathway	Gene Ontology	GO:0034138	1	13	0.384941	0.818341	CAV1	http://amigo.geneontology.org/amigo/term/GO:0034138
regulation of phosphoprotein phosphatase activity	Gene Ontology	GO:0043666	1	13	0.384941	0.818341	PPP1R1A	http://amigo.geneontology.org/amigo/term/GO:0043666
chaperone binding	Gene Ontology	GO:0051087	1	13	0.384941	0.818341	BIRC5	http://amigo.geneontology.org/amigo/term/GO:0051087
basement membrane	Gene Ontology	GO:0005604	1	13	0.384941	0.818341	PTN	http://amigo.geneontology.org/amigo/term/GO:0005604
muscle atrophy	Gene Ontology	GO:0014889	1	13	0.384941	0.818341	MYOG	http://amigo.geneontology.org/amigo/term/GO:0014889
negative regulation of BMP signaling pathway	Gene Ontology	GO:0030514	1	13	0.384941	0.818341	TMPRSS6	http://amigo.geneontology.org/amigo/term/GO:0030514
kidney vasculature morphogenesis	Gene Ontology	GO:0061439	1	13	0.384941	0.818341	TCF21	http://amigo.geneontology.org/amigo/term/GO:0061439
ureteric bud morphogenesis	Gene Ontology	GO:0060675	1	13	0.384941	0.818341	FGF1	http://amigo.geneontology.org/amigo/term/GO:0060675
contractile actin filament bundle	Gene Ontology	GO:0097517	1	13	0.384941	0.818341	LPL	http://amigo.geneontology.org/amigo/term/GO:0097517
cellular pigmentation	Gene Ontology	GO:0033059	1	13	0.384941	0.818341	TYRP1	http://amigo.geneontology.org/amigo/term/GO:0033059
mitochondrial respirasome	Gene Ontology	GO:0005746	1	13	0.384941	0.818341	COX7B2	http://amigo.geneontology.org/amigo/term/GO:0005746
hair cycle	Gene Ontology	GO:0042633	1	13	0.384941	0.818341	GAL	http://amigo.geneontology.org/amigo/term/GO:0042633
9+0 non-motile cilium	Gene Ontology	GO:0097731	1	13	0.384941	0.818341	GNGT1	http://amigo.geneontology.org/amigo/term/GO:0097731
secondary metabolite biosynthetic process	Gene Ontology	GO:0044550	1	13	0.384941	0.818341	DCT	http://amigo.geneontology.org/amigo/term/GO:0044550
negative regulation of viral life cycle	Gene Ontology	GO:1903901	1	13	0.384941	0.818341	ISG15	http://amigo.geneontology.org/amigo/term/GO:1903901
regulation of biomineralization	Gene Ontology	GO:0110149	1	13	0.384941	0.818341	DDR2	http://amigo.geneontology.org/amigo/term/GO:0110149
regulation of phosphate metabolic process	Gene Ontology	GO:0019220	34	905	0.385711	0.818341	PTH1R|ELANE|CLSPN|PRKAR2B|ADCYAP1R1|APOA1|ADIPOQ|FAM83D|PPP1R1A|LHCGR|CEBPA|FZD4|DSC1|INHBA|CDC6|CCL21|EDN3|FGG|SPOCD1|EPHB1|CKS2|CAMK2N2|KIRREL2|GDF15|ELFN2|CCNB1|CCL14|LEP|GPLD1|GNG3|RAD51|MMP9|MMD|ATF3	http://amigo.geneontology.org/amigo/term/GO:0019220
negative regulation of protein kinase activity	Gene Ontology	GO:0006469	2	37	0.386013	0.818341	IL6|GPRC5A	http://amigo.geneontology.org/amigo/term/GO:0006469
protein localization to mitochondrion	Gene Ontology	GO:0070585	2	37	0.386013	0.818341	E2F1|PDE2A	http://amigo.geneontology.org/amigo/term/GO:0070585
positive regulation of transmembrane receptor protein serine/threonine kinase signaling pathway	Gene Ontology	GO:0090100	2	37	0.386013	0.818341	GATA4|GDF15	http://amigo.geneontology.org/amigo/term/GO:0090100
ovulation cycle	Gene Ontology	GO:0042698	2	37	0.386013	0.818341	LHCGR|BMPR1B	http://amigo.geneontology.org/amigo/term/GO:0042698
hormone receptor binding	Gene Ontology	GO:0051427	2	37	0.386013	0.818341	PROX1|RUNDC3A	http://amigo.geneontology.org/amigo/term/GO:0051427
nodal signaling pathway	Gene Ontology	GO:0038092	2	37	0.386013	0.818341	FOXH1|ACVR1C	http://amigo.geneontology.org/amigo/term/GO:0038092
Golgi membrane	Gene Ontology	GO:0000139	5	115	0.389853	0.826085	HMP19|HN1|CAV2|B4GALNT2|CAV1	http://amigo.geneontology.org/amigo/term/GO:0000139
BMP signaling pathway	Gene Ontology	GO:0030509	3	63	0.392312	0.830503	TMEM100|SFRP1|BMP8A	http://amigo.geneontology.org/amigo/term/GO:0030509
cell death	Gene Ontology	GO:0008219	37	993	0.397509	0.840067	MAD2L1|NUAK2|CHL1|EPHB1|LIFR|ZMAT4|APLP1|CSRNP3|S100A14|MIEN1|AKR1C3|LGALS12|STIL|GSDMC|DPEP1|PROKR1|WISP1|S100A8|ZSWIM2|CCL21|TERT|RAX|CDKN2A|BMP8A|BEX1|DNASE1L3|CX3CL1|ADAMTS20|FGF4|SGK2|ESR2|E2F2|SRPX|ADRB2|PDK4|MMP3|PAK3	http://amigo.geneontology.org/amigo/term/GO:0008219
phosphatidylinositol binding	Gene Ontology	GO:0035091	2	38	0.398156	0.840067	AMER3|CEACAM5	http://amigo.geneontology.org/amigo/term/GO:0035091
ruffle organization	Gene Ontology	GO:0031529	2	38	0.398156	0.840067	CCL21|NLGN1	http://amigo.geneontology.org/amigo/term/GO:0031529
protein tyrosine kinase activity	Gene Ontology	GO:0004713	2	38	0.398156	0.840067	NEURL1|EPHA8	http://amigo.geneontology.org/amigo/term/GO:0004713
ubiquitin protein ligase activity	Gene Ontology	GO:0061630	2	38	0.398156	0.840067	PLK1|USP44	http://amigo.geneontology.org/amigo/term/GO:0061630
Notch signaling pathway	Gene Ontology	GO:0007219	2	38	0.398156	0.840067	TMEM100|ASCL1	http://amigo.geneontology.org/amigo/term/GO:0007219
phospholipase C-activating G protein-coupled receptor signaling pathway	Gene Ontology	GO:0007200	3	64	0.401554	0.843627	LHCGR|RXFP3|HTR2A	http://amigo.geneontology.org/amigo/term/GO:0007200
organophosphate biosynthetic process	Gene Ontology	GO:0090407	5	117	0.403403	0.843627	LHCGR|RUNDC3A|NMRK2|AK5|APOA1	http://amigo.geneontology.org/amigo/term/GO:0090407
positive regulation of purine nucleotide biosynthetic process	Gene Ontology	GO:1900373	1	14	0.40593	0.843627	PID1	http://amigo.geneontology.org/amigo/term/GO:1900373
protein methyltransferase activity	Gene Ontology	GO:0008276	1	14	0.40593	0.843627	PRDM13	http://amigo.geneontology.org/amigo/term/GO:0008276
melanin biosynthetic process	Gene Ontology	GO:0042438	1	14	0.40593	0.843627	TYRP1	http://amigo.geneontology.org/amigo/term/GO:0042438
regulation of DNA-templated transcription, elongation	Gene Ontology	GO:0032784	1	14	0.40593	0.843627	POU4F1	http://amigo.geneontology.org/amigo/term/GO:0032784
secretory granule membrane	Gene Ontology	GO:0030667	1	14	0.40593	0.843627	CA4	http://amigo.geneontology.org/amigo/term/GO:0030667
positive regulation of cation transmembrane transport	Gene Ontology	GO:1904064	1	14	0.40593	0.843627	CXCL9	http://amigo.geneontology.org/amigo/term/GO:1904064
vagina development	Gene Ontology	GO:0060068	1	14	0.40593	0.843627	LHX1	http://amigo.geneontology.org/amigo/term/GO:0060068
sphingolipid biosynthetic process	Gene Ontology	GO:0030148	1	14	0.40593	0.843627	DEGS2	http://amigo.geneontology.org/amigo/term/GO:0030148
mammary gland epithelium development	Gene Ontology	GO:0061180	1	14	0.40593	0.843627	FGF2	http://amigo.geneontology.org/amigo/term/GO:0061180
positive regulation of protein targeting to mitochondrion	Gene Ontology	GO:1903955	1	14	0.40593	0.843627	IFNL3	http://amigo.geneontology.org/amigo/term/GO:1903955
positive regulation of organic acid transport	Gene Ontology	GO:0032892	1	14	0.40593	0.843627	DRP2	http://amigo.geneontology.org/amigo/term/GO:0032892
prostate glandular acinus development	Gene Ontology	GO:0060525	1	14	0.40593	0.843627	SFRP1	http://amigo.geneontology.org/amigo/term/GO:0060525
autophagosome assembly	Gene Ontology	GO:0000045	1	14	0.40593	0.843627	MAP1LC3C	http://amigo.geneontology.org/amigo/term/GO:0000045
regulation of positive chemotaxis	Gene Ontology	GO:0050926	1	14	0.40593	0.843627	ARTN	http://amigo.geneontology.org/amigo/term/GO:0050926
endocardial cushion development	Gene Ontology	GO:0003197	1	14	0.40593	0.843627	TBX20	http://amigo.geneontology.org/amigo/term/GO:0003197
glycine catabolic process	Gene Ontology	GO:0006546	1	14	0.40593	0.843627	GLDC	http://amigo.geneontology.org/amigo/term/GO:0006546
early endosome membrane	Gene Ontology	GO:0031901	1	14	0.40593	0.843627	DKK1	http://amigo.geneontology.org/amigo/term/GO:0031901
regulation of nitric-oxide synthase activity	Gene Ontology	GO:0050999	1	14	0.40593	0.843627	CAV1	http://amigo.geneontology.org/amigo/term/GO:0050999
histone methyltransferase complex	Gene Ontology	GO:0035097	1	14	0.40593	0.843627	DYDC2	http://amigo.geneontology.org/amigo/term/GO:0035097
negative regulation of collagen biosynthetic process	Gene Ontology	GO:0032966	1	14	0.40593	0.843627	PPARG	http://amigo.geneontology.org/amigo/term/GO:0032966
organelle envelope lumen	Gene Ontology	GO:0031970	1	14	0.40593	0.843627	TXNIP	http://amigo.geneontology.org/amigo/term/GO:0031970
amygdala development	Gene Ontology	GO:0021764	1	14	0.40593	0.843627	ESR2	http://amigo.geneontology.org/amigo/term/GO:0021764
neurotrophin TRK receptor signaling pathway	Gene Ontology	GO:0048011	1	14	0.40593	0.843627	SPRY2	http://amigo.geneontology.org/amigo/term/GO:0048011
protein tyrosine phosphatase activity	Gene Ontology	GO:0004725	1	14	0.40593	0.843627	DUSP1	http://amigo.geneontology.org/amigo/term/GO:0004725
regulation of mesenchymal cell proliferation	Gene Ontology	GO:0010464	1	14	0.40593	0.843627	TP63	http://amigo.geneontology.org/amigo/term/GO:0010464
DNA dealkylation	Gene Ontology	GO:0035510	1	14	0.40593	0.843627	APOBEC1	http://amigo.geneontology.org/amigo/term/GO:0035510
SMAD protein signal transduction	Gene Ontology	GO:0060395	1	14	0.40593	0.843627	GDF10	http://amigo.geneontology.org/amigo/term/GO:0060395
contractile actin filament bundle assembly	Gene Ontology	GO:0030038	1	14	0.40593	0.843627	SFRP1	http://amigo.geneontology.org/amigo/term/GO:0030038
syntaxin binding	Gene Ontology	GO:0019905	1	14	0.40593	0.843627	FHL5	http://amigo.geneontology.org/amigo/term/GO:0019905
Golgi subcompartment	Gene Ontology	GO:0098791	2	39	0.410185	0.849675	GAL3ST2|SOD3	http://amigo.geneontology.org/amigo/term/GO:0098791
regulation of mRNA metabolic process	Gene Ontology	GO:1903311	2	39	0.410185	0.849675	ZFP36|APOBEC1	http://amigo.geneontology.org/amigo/term/GO:1903311
positive regulation of protein oligomerization	Gene Ontology	GO:0032461	2	39	0.410185	0.849675	CLGN|MMP1	http://amigo.geneontology.org/amigo/term/GO:0032461
tissue migration	Gene Ontology	GO:0090130	2	39	0.410185	0.849675	MAST1|TACR1	http://amigo.geneontology.org/amigo/term/GO:0090130
nuclear envelope	Gene Ontology	GO:0005635	3	65	0.410756	0.849675	DST|LMNB1|PTCHD2	http://amigo.geneontology.org/amigo/term/GO:0005635
negative regulation of DNA-binding transcription factor activity	Gene Ontology	GO:0043433	3	65	0.410756	0.849675	CDKN2A|KLF4|CAT	http://amigo.geneontology.org/amigo/term/GO:0043433
embryonic limb morphogenesis	Gene Ontology	GO:0030326	3	65	0.410756	0.849675	HN1|TP63|HOXD12	http://amigo.geneontology.org/amigo/term/GO:0030326
regulation of autophagy	Gene Ontology	GO:0010506	3	65	0.410756	0.849675	GATA4|EEF1A2|PHYHIP	http://amigo.geneontology.org/amigo/term/GO:0010506
guanyl nucleotide binding	Gene Ontology	GO:0019001	3	65	0.410756	0.849675	EEF1A2|GBP5|GNAI1	http://amigo.geneontology.org/amigo/term/GO:0019001
positive regulation of cell differentiation	Gene Ontology	GO:0045597	20	530	0.417447	0.863113	UTS2|TGFBR2|DMD|BMP2|SYT1|NLGN1|BRINP3|SYT4|CRB2|PPARG|SMYD1|UNC13A|SEZ6|LEF1|EDN3|ATOH8|PROC|PROX1|ADIPOQ|MYOCD	http://amigo.geneontology.org/amigo/term/GO:0045597
myeloid cell homeostasis	Gene Ontology	GO:0002262	2	40	0.422095	0.870264	EPB42|KIT	http://amigo.geneontology.org/amigo/term/GO:0002262
neuron fate specification	Gene Ontology	GO:0048665	2	40	0.422095	0.870264	DMRTA2|HOXC10	http://amigo.geneontology.org/amigo/term/GO:0048665
endocytic vesicle	Gene Ontology	GO:0030139	2	40	0.422095	0.870264	TYRP1|CD36	http://amigo.geneontology.org/amigo/term/GO:0030139
appendage development	Gene Ontology	GO:0048736	5	120	0.423654	0.870264	SALL4|PKDCC|PITX1|HOXD12|DKK1	http://amigo.geneontology.org/amigo/term/GO:0048736
positive regulation of osteoblast differentiation	Gene Ontology	GO:0045669	1	15	0.426204	0.870264	DLX5	http://amigo.geneontology.org/amigo/term/GO:0045669
hydrolase activity, acting on carbon-nitrogen (but not peptide) bonds, in linear amides	Gene Ontology	GO:0016811	1	15	0.426204	0.870264	CAT	http://amigo.geneontology.org/amigo/term/GO:0016811
positive regulation of BMP signaling pathway	Gene Ontology	GO:0030513	1	15	0.426204	0.870264	HN1	http://amigo.geneontology.org/amigo/term/GO:0030513
positive regulation of nucleotide biosynthetic process	Gene Ontology	GO:0030810	1	15	0.426204	0.870264	PID1	http://amigo.geneontology.org/amigo/term/GO:0030810
PDZ domain binding	Gene Ontology	GO:0030165	1	15	0.426204	0.870264	NLGN1	http://amigo.geneontology.org/amigo/term/GO:0030165
formation of translation preinitiation complex	Gene Ontology	GO:0001731	1	15	0.426204	0.870264	TICRR	http://amigo.geneontology.org/amigo/term/GO:0001731
motile cilium	Gene Ontology	GO:0031514	1	15	0.426204	0.870264	ANXA1	http://amigo.geneontology.org/amigo/term/GO:0031514
lens development in camera-type eye	Gene Ontology	GO:0002088	1	15	0.426204	0.870264	TMOD1	http://amigo.geneontology.org/amigo/term/GO:0002088
regulation of cilium assembly	Gene Ontology	GO:1902017	1	15	0.426204	0.870264	CCDC151	http://amigo.geneontology.org/amigo/term/GO:1902017
neural crest cell migration	Gene Ontology	GO:0001755	1	15	0.426204	0.870264	SEMA3D	http://amigo.geneontology.org/amigo/term/GO:0001755
lateral plasma membrane	Gene Ontology	GO:0016328	1	15	0.426204	0.870264	SCN5A	http://amigo.geneontology.org/amigo/term/GO:0016328
oxaloacetate metabolic process	Gene Ontology	GO:0006107	1	15	0.426204	0.870264	PCK1	http://amigo.geneontology.org/amigo/term/GO:0006107
axis specification	Gene Ontology	GO:0009798	1	15	0.426204	0.870264	WT1	http://amigo.geneontology.org/amigo/term/GO:0009798
mating behavior	Gene Ontology	GO:0007617	1	15	0.426204	0.870264	TH	http://amigo.geneontology.org/amigo/term/GO:0007617
lamellipodium organization	Gene Ontology	GO:0097581	1	15	0.426204	0.870264	S1PR1	http://amigo.geneontology.org/amigo/term/GO:0097581
somitogenesis	Gene Ontology	GO:0001756	1	15	0.426204	0.870264	MEOX1	http://amigo.geneontology.org/amigo/term/GO:0001756
dioxygenase activity	Gene Ontology	GO:0051213	1	15	0.426204	0.870264	P4HA3	http://amigo.geneontology.org/amigo/term/GO:0051213
structural constituent of cytoskeleton	Gene Ontology	GO:0005200	1	15	0.426204	0.870264	CTNNA2	http://amigo.geneontology.org/amigo/term/GO:0005200
hindlimb morphogenesis	Gene Ontology	GO:0035137	1	15	0.426204	0.870264	ZBTB16	http://amigo.geneontology.org/amigo/term/GO:0035137
lipoprotein biosynthetic process	Gene Ontology	GO:0042158	1	15	0.426204	0.870264	APOA2	http://amigo.geneontology.org/amigo/term/GO:0042158
renal system pattern specification	Gene Ontology	GO:0072048	1	15	0.426204	0.870264	FOXD1	http://amigo.geneontology.org/amigo/term/GO:0072048
positive regulation of lipid localization	Gene Ontology	GO:1905954	1	15	0.426204	0.870264	NTSR1	http://amigo.geneontology.org/amigo/term/GO:1905954
macromolecule glycosylation	Gene Ontology	GO:0043413	3	67	0.429022	0.875213	ADAMTS5|MUC13|B4GALNT2	http://amigo.geneontology.org/amigo/term/GO:0043413
olfactory receptor activity	Gene Ontology	GO:0004984	3	67	0.429022	0.875213	OR2B2|OR2L13|OR5P2	http://amigo.geneontology.org/amigo/term/GO:0004984
coenzyme binding	Gene Ontology	GO:0050662	2	41	0.433878	0.881875	FMO2|PYGM	http://amigo.geneontology.org/amigo/term/GO:0050662
ventral spinal cord development	Gene Ontology	GO:0021517	2	41	0.433878	0.881875	ISL2|ASCL1	http://amigo.geneontology.org/amigo/term/GO:0021517
cysteine-type endopeptidase activity	Gene Ontology	GO:0004197	2	41	0.433878	0.881875	CAPN9|GSN	http://amigo.geneontology.org/amigo/term/GO:0004197
cell-matrix adhesion	Gene Ontology	GO:0007160	2	41	0.433878	0.881875	CCL28|FGG	http://amigo.geneontology.org/amigo/term/GO:0007160
intrinsic component of organelle membrane	Gene Ontology	GO:0031300	2	41	0.433878	0.881875	SPPL2C|DGAT2	http://amigo.geneontology.org/amigo/term/GO:0031300
regulation of cellular process	Gene Ontology	GO:0050794	163	4547	0.435685	0.885142	ELANE|MALRD1|HBB|PCK1|OR2L3|ADIPOQ|LINGO1|UPK1A|GNG13|AQPEP|RELN|HEPACAM|MAS1L|NPR3|BMP8A|TRHDE|IL19|CENPE|RAMP1|RGS6|TNIP3|SFRP1|DMRTC2|ADAMTS20|TMEM100|ELFN2|NKX6-1|ADRA1A|CXCL2|RNASE10|GTSE1|KIF23|KCNIP2|FOXA3|NPW|GPR112|PAK3|HUS1B|DMD|CCL7|EPHB1|ZNF695|GPR19|PRG4|EDNRB|APOBEC3B|MNX1|APOA1|PTN|IFNL3|PREX2|TAS1R3|CCNE2|EXO1|CSTL1|EN1|VIL1|ZIC3|DLX4|TRPM1|HOXA2|TRH|TFR2|HOXB1|HIST1H4L|LBX1|LMX1A…	http://amigo.geneontology.org/amigo/term/GO:0050794
mitochondrial envelope	Gene Ontology	GO:0005740	5	122	0.437085	0.887578	CKMT2|TYMS|COX6A2|ABCA8|CIDEA	http://amigo.geneontology.org/amigo/term/GO:0005740
epithelium development	Gene Ontology	GO:0060429	23	620	0.43818	0.888988	PTK6|CAT|TNMD|LEF1|MEOX1|AKR1C2|AKR1C3|STIL|S100A7|C6|FOXJ1|MUC1|ASCL1|PPARG|MCIDAS|GATA4|E2F7|BMP2|SPRY2|ROBO2|E2F8|HN1|PDX1	http://amigo.geneontology.org/amigo/term/GO:0060429
positive regulation of canonical Wnt signaling pathway	Gene Ontology	GO:0090263	2	42	0.445531	0.893788	DLX5|SFRP1	http://amigo.geneontology.org/amigo/term/GO:0090263
protein localization to plasma membrane	Gene Ontology	GO:0072659	2	42	0.445531	0.893788	SCN3B|ADIPOQ	http://amigo.geneontology.org/amigo/term/GO:0072659
eye morphogenesis	Gene Ontology	GO:0048592	2	42	0.445531	0.893788	LHX1|CRB2	http://amigo.geneontology.org/amigo/term/GO:0048592
central nervous system projection neuron axonogenesis	Gene Ontology	GO:0021952	1	16	0.445785	0.893788	PLXNA4	http://amigo.geneontology.org/amigo/term/GO:0021952
cellular response to monoamine stimulus	Gene Ontology	GO:0071868	1	16	0.445785	0.893788	D4S234E	http://amigo.geneontology.org/amigo/term/GO:0071868
protease binding	Gene Ontology	GO:0002020	1	16	0.445785	0.893788	CHL1	http://amigo.geneontology.org/amigo/term/GO:0002020
regulation of mitophagy	Gene Ontology	GO:1901524	1	16	0.445785	0.893788	MYH11	http://amigo.geneontology.org/amigo/term/GO:1901524
histone H3 acetylation	Gene Ontology	GO:0043966	1	16	0.445785	0.893788	PER1	http://amigo.geneontology.org/amigo/term/GO:0043966
ion channel regulator activity	Gene Ontology	GO:0099106	1	16	0.445785	0.893788	ADRB2	http://amigo.geneontology.org/amigo/term/GO:0099106
positive regulation of synapse maturation	Gene Ontology	GO:0090129	1	16	0.445785	0.893788	NEURL1	http://amigo.geneontology.org/amigo/term/GO:0090129
plasma membrane raft	Gene Ontology	GO:0044853	1	16	0.445785	0.893788	AKAP6	http://amigo.geneontology.org/amigo/term/GO:0044853
protein localization to cytoskeleton	Gene Ontology	GO:0044380	1	16	0.445785	0.893788	SPAG5	http://amigo.geneontology.org/amigo/term/GO:0044380
cell-substrate adherens junction assembly	Gene Ontology	GO:0007045	1	16	0.445785	0.893788	MAST1	http://amigo.geneontology.org/amigo/term/GO:0007045
substrate adhesion-dependent cell spreading	Gene Ontology	GO:0034446	1	16	0.445785	0.893788	FZD4	http://amigo.geneontology.org/amigo/term/GO:0034446
positive regulation of dephosphorylation	Gene Ontology	GO:0035306	1	16	0.445785	0.893788	GPLD1	http://amigo.geneontology.org/amigo/term/GO:0035306
nuclear pore	Gene Ontology	GO:0005643	1	16	0.445785	0.893788	MAD2L1	http://amigo.geneontology.org/amigo/term/GO:0005643
cellular response to vascular endothelial growth factor stimulus	Gene Ontology	GO:0035924	1	16	0.445785	0.893788	EGR3	http://amigo.geneontology.org/amigo/term/GO:0035924
molting cycle	Gene Ontology	GO:0042303	1	16	0.445785	0.893788	INHBA	http://amigo.geneontology.org/amigo/term/GO:0042303
cellular response to corticosteroid stimulus	Gene Ontology	GO:0071384	1	16	0.445785	0.893788	IFNB1	http://amigo.geneontology.org/amigo/term/GO:0071384
regulation of TOR signaling	Gene Ontology	GO:0032006	1	16	0.445785	0.893788	NPR3	http://amigo.geneontology.org/amigo/term/GO:0032006
PML body	Gene Ontology	GO:0016605	1	16	0.445785	0.893788	RAD51	http://amigo.geneontology.org/amigo/term/GO:0016605
activation of adenylate cyclase activity	Gene Ontology	GO:0007190	1	16	0.445785	0.893788	LHCGR	http://amigo.geneontology.org/amigo/term/GO:0007190
Z disc	Gene Ontology	GO:0030018	1	16	0.445785	0.893788	SCN1A	http://amigo.geneontology.org/amigo/term/GO:0030018
regulation of urine volume	Gene Ontology	GO:0035809	1	16	0.445785	0.893788	ADRB2	http://amigo.geneontology.org/amigo/term/GO:0035809
positive regulation of plasma membrane bounded cell projection assembly	Gene Ontology	GO:0120034	1	16	0.445785	0.893788	NLGN1	http://amigo.geneontology.org/amigo/term/GO:0120034
embryonic appendage morphogenesis	Gene Ontology	GO:0035113	3	69	0.447081	0.89598	SP8|TP63|DLX6	http://amigo.geneontology.org/amigo/term/GO:0035113
organic substance transport	Gene Ontology	GO:0071702	39	1074	0.455157	0.911753	IGF2BP1|PNLIP|SLC29A4|AKAP12|RTP3|SORBS1|SLC16A6|IGF2BP3|ADIPOQ|GPAM|FZD4|RHBG|INHBA|VIL1|APOA2|CX3CL1|EDN3|S100A8|GPLD1|BMP8A|KRT20|CRHBP|CAPS|PPARG|HBA1|CADPS|HBA2|GPR26|APOLD1|CIDEA|FN1|ACSL1|SLC7A11|TXNIP|SLC7A13|ITLN1|OXTR|PTPRN|SLC1A1	http://amigo.geneontology.org/amigo/term/GO:0071702
macrophage derived foam cell differentiation	Gene Ontology	GO:0010742	3	70	0.456024	0.912666	APOB|PF4|CD36	http://amigo.geneontology.org/amigo/term/GO:0010742
steroid hormone mediated signaling pathway	Gene Ontology	GO:0043401	3	70	0.456024	0.912666	PPARG|ESR2|NR4A3	http://amigo.geneontology.org/amigo/term/GO:0043401
negative regulation of G1/S transition of mitotic cell cycle	Gene Ontology	GO:2000134	2	43	0.457048	0.91389	FHL1|E2F1	http://amigo.geneontology.org/amigo/term/GO:2000134
distal axon	Gene Ontology	GO:0150034	2	43	0.457048	0.91389	OPRD1|NTRK2	http://amigo.geneontology.org/amigo/term/GO:0150034
cell fate specification	Gene Ontology	GO:0001708	4	98	0.460924	0.920885	SOX2|ASCL1|FGF2|DKK1	http://amigo.geneontology.org/amigo/term/GO:0001708
protein serine/threonine/tyrosine kinase activity	Gene Ontology	GO:0004712	1	17	0.464699	0.920885	AURKA	http://amigo.geneontology.org/amigo/term/GO:0004712
regulation of glial cell proliferation	Gene Ontology	GO:0060251	1	17	0.464699	0.920885	ASCL2	http://amigo.geneontology.org/amigo/term/GO:0060251
androgen receptor signaling pathway	Gene Ontology	GO:0030521	1	17	0.464699	0.920885	TCF21	http://amigo.geneontology.org/amigo/term/GO:0030521
tyrosine phosphorylation of STAT protein	Gene Ontology	GO:0007260	1	17	0.464699	0.920885	LEP	http://amigo.geneontology.org/amigo/term/GO:0007260
site of polarized growth	Gene Ontology	GO:0030427	1	17	0.464699	0.920885	IGF2BP1	http://amigo.geneontology.org/amigo/term/GO:0030427
integrin binding	Gene Ontology	GO:0005178	1	17	0.464699	0.920885	ECM2	http://amigo.geneontology.org/amigo/term/GO:0005178
dendritic spine	Gene Ontology	GO:0043197	1	17	0.464699	0.920885	NLGN1	http://amigo.geneontology.org/amigo/term/GO:0043197
Golgi to plasma membrane transport	Gene Ontology	GO:0006893	1	17	0.464699	0.920885	SPTBN1	http://amigo.geneontology.org/amigo/term/GO:0006893
negative regulation of ERK1 and ERK2 cascade	Gene Ontology	GO:0070373	1	17	0.464699	0.920885	CAV1	http://amigo.geneontology.org/amigo/term/GO:0070373
movement in environment of other organism involved in symbiotic interaction	Gene Ontology	GO:0052192	1	17	0.464699	0.920885	TRIM15	http://amigo.geneontology.org/amigo/term/GO:0052192
TOR signaling	Gene Ontology	GO:0031929	1	17	0.464699	0.920885	SLC7A3	http://amigo.geneontology.org/amigo/term/GO:0031929
regulation of osteoblast differentiation	Gene Ontology	GO:0045667	1	17	0.464699	0.920885	SOX11	http://amigo.geneontology.org/amigo/term/GO:0045667
protein import into nucleus	Gene Ontology	GO:0006606	1	17	0.464699	0.920885	KPNA7	http://amigo.geneontology.org/amigo/term/GO:0006606
regulation of protein localization to membrane	Gene Ontology	GO:1905475	1	17	0.464699	0.920885	KCNE1	http://amigo.geneontology.org/amigo/term/GO:1905475
N-acyltransferase activity	Gene Ontology	GO:0016410	1	17	0.464699	0.920885	ESCO2	http://amigo.geneontology.org/amigo/term/GO:0016410
ventricular septum development	Gene Ontology	GO:0003281	1	17	0.464699	0.920885	SALL4	http://amigo.geneontology.org/amigo/term/GO:0003281
positive regulation of proteasomal protein catabolic process	Gene Ontology	GO:1901800	1	17	0.464699	0.920885	IL33	http://amigo.geneontology.org/amigo/term/GO:1901800
extrinsic apoptotic signaling pathway in absence of ligand	Gene Ontology	GO:0097192	1	17	0.464699	0.920885	INHBA	http://amigo.geneontology.org/amigo/term/GO:0097192
positive regulation of protein metabolic process	Gene Ontology	GO:0051247	21	574	0.468104	0.927026	VIP|IL21|TPX2|FGG|ANGPT1|ACVR1C|CLSPN|MT3|ADIPOQ|IL12B|KIT|KIF14|ADRB2|ITLN1|DOK7|CX3CL1|GDF15|PAK3|CSF3|FGF1|CAV1	http://amigo.geneontology.org/amigo/term/GO:0051247
regulation of cellular response to stress	Gene Ontology	GO:0080135	4	99	0.468416	0.927026	SFRP1|CAV3|CD36|TNR	http://amigo.geneontology.org/amigo/term/GO:0080135
positive regulation of mitochondrion organization	Gene Ontology	GO:0010822	2	44	0.468425	0.927026	NRG1|MYH11	http://amigo.geneontology.org/amigo/term/GO:0010822
RNA binding	Gene Ontology	GO:0003723	6	155	0.471439	0.932574	JAKMIP1|SOX11|CELF3|APOBEC1|ZFP36|TERT	http://amigo.geneontology.org/amigo/term/GO:0003723
positive regulation of cellular component organization	Gene Ontology	GO:0051130	18	491	0.471895	0.93306	SLITRK6|ANXA1|NMUR1|NUSAP1|METRN|CALY|LRRTM2|MYLK|MAST1|LPL|EZH2|RELN|OXTR|GABRA5|ADAMTS1|SLC22A3|APOA1|DAZL	http://amigo.geneontology.org/amigo/term/GO:0051130
intracellular protein transport	Gene Ontology	GO:0006886	7	183	0.472122	0.933093	MGARP|GPIHBP1|RAMP1|STX11|RIMS2|SYNDIG1|ADIPOQ	http://amigo.geneontology.org/amigo/term/GO:0006886
ribonucleotide biosynthetic process	Gene Ontology	GO:0009260	3	72	0.473722	0.935839	RUNDC3A|AK5|ACACB	http://amigo.geneontology.org/amigo/term/GO:0009260
cellular response to acid chemical	Gene Ontology	GO:0071229	4	100	0.47587	0.939244	BRINP3|CCNB1|APOB|MYOG	http://amigo.geneontology.org/amigo/term/GO:0071229
sprouting angiogenesis	Gene Ontology	GO:0002040	2	45	0.479659	0.943596	GPLD1|FGF2	http://amigo.geneontology.org/amigo/term/GO:0002040
secondary alcohol metabolic process	Gene Ontology	GO:1902652	1	18	0.482968	0.943596	LEP	http://amigo.geneontology.org/amigo/term/GO:1902652
protein O-linked glycosylation	Gene Ontology	GO:0006493	1	18	0.482968	0.943596	MUC1	http://amigo.geneontology.org/amigo/term/GO:0006493
[truncated: 2,141 more rows]

## Sheet: DEmRNA KEGG
#Term	Database	ID	Input number	Background number	P-Value	Corrected P-Value	Input	Hyperlink
Alcoholism	KEGG PATHWAY	hsa05034	65	180	8.51206e-39	1.88755e-35	HIST1H4B|HIST1H4A|HIST1H2BB|HIST1H4E|HIST1H4D|HIST1H4K|HIST1H4J|FOSB|HIST1H4H|GNG11|HIST1H2AM|HIST1H2AL|HIST1H2AI|HIST1H2AH|HIST2H2BE|HIST1H2AJ|HIST1H2AE|HIST1H2AD|HIST1H2AG|GNAI1|HIST1H3I|HIST2H2AB|GNG4|NTRK2|GNG13|TH|HIST2H4A|HIST2H2AA4|HIST1H4I|GNGT1|HIST2H3D|HIST1H4L|CREB5|HIST1H2BL|HIST1H2BD|HIST1H3C|HIST1H2BF|HIST1H2BG|HIST1H3F|HIST1H3G|HIST1H3D|HIST1H2BC|HIST1H3J|HIST1H2BM|HIST1H3H|HIST1H2…	http://www.genome.jp/kegg-bin/show_pathway?hsa05034/hsa:8358%09red/hsa:8359%09red/hsa:9586%09red/hsa:8294%09red/hsa:8352%09red/hsa:2791%09red/hsa:2792%09red/hsa:51806%09red/hsa:8356%09red/hsa:8357%09red/hsa:8354%09red/hsa:8355%09red/hsa:8338%09red/hsa:8339%09red/hsa:8370%09red/hsa:2904%09red/hsa:8331%09red/hsa:8332%09red/hsa:90993%09red/hsa:4128%09red/hsa:8336%09red/hsa:2906%09red/hsa:8969%09red/…
Neuroactive ligand-receptor interaction	KEGG PATHWAY	hsa04080	75	338	1.66383e-32	2.4597e-29	PTH1R|PTGFR|GHRH|HTR1D|GHR|TRH|GRIA2|GABRG2|GABRG1|GRIA4|NTSR1|PRSS1|VIP|GPR50|UCN3|GABRA5|GABRA4|GABBR2|ADCYAP1R1|GABRA1|EDNRB|GABRA3|P2RX6|CCKBR|LHCGR|RXFP3|GALR1|PRLH|GAL|GRM8|HRH3|GRM4|HTR2A|EDN3|EDN2|PENK|UTS2|KISS1R|KISS1|GRIN2D|PYY|SSTR2|F2|LEPR|CHRNA4|SCTR|CHRNA6|HTR4|MAS1|HTR1E|GCGR|TACR3|CHRNA9|TACR1|ADRA1A|PMCH|NMUR1|NMU|GRIN2B|AVPR2|GABRQ|NPY2R|LEP|SSTR1|ADRB2|ADRB3|SSTR5|OPRD1|NPBWR1…	http://www.genome.jp/kegg-bin/show_pathway?hsa04080/hsa:9568%09red/hsa:3953%09red/hsa:3952%09red/hsa:3814%09red/hsa:5021%09red/hsa:154%09red/hsa:3973%09red/hsa:6870%09red/hsa:5367%09red/hsa:7432%09red/hsa:9248%09red/hsa:2587%09red/hsa:10911%09red/hsa:2904%09red/hsa:1137%09red/hsa:2906%09red/hsa:51289%09red/hsa:887%09red/hsa:554%09red/hsa:2554%09red/hsa:4142%09red/hsa:51083%09red/hsa:7200%09red/hs…
Systemic lupus erythematosus	KEGG PATHWAY	hsa05322	51	133	9.52373e-32	1.05594e-28	HIST1H4B|HIST1H4A|HIST1H2BB|HIST1H4E|HIST1H4D|HIST1H4K|HIST1H4J|HIST1H4I|HIST1H4H|ELANE|HIST1H4L|HIST1H2AM|HIST1H2AL|HIST1H2AI|HIST1H2AH|HIST2H2BE|HIST1H2AJ|HIST1H2AE|HIST1H2AD|HIST1H2AG|HIST2H4A|HIST1H3I|HIST2H2AB|HIST2H2AC|HIST1H2AB|HIST2H2AA4|HIST1H2BL|HIST1H2BD|HIST1H3C|HIST1H2BF|HIST1H2BG|HIST1H3F|HIST1H3G|HIST1H3D|HIST1H2BC|HIST1H3J|HIST1H2BM|HIST1H3H|HIST1H2BO|HIST1H2BH|HIST1H2BI|HIST1H2BJ…	http://www.genome.jp/kegg-bin/show_pathway?hsa05322/hsa:8358%09red/hsa:8359%09red/hsa:8294%09red/hsa:8352%09red/hsa:8351%09red/hsa:8356%09red/hsa:8357%09red/hsa:8354%09red/hsa:8355%09red/hsa:8338%09red/hsa:8339%09red/hsa:8370%09red/hsa:2904%09red/hsa:8331%09red/hsa:8332%09red/hsa:8335%09red/hsa:8336%09red/hsa:8969%09red/hsa:8968%09red/hsa:128312%09red/hsa:723790%09red/hsa:8368%09red/hsa:8349%09re…
Cytokine-cytokine receptor interaction	KEGG PATHWAY	hsa04060	56	294	7.55258e-22	3.04506e-19	CCL7|GHR|DTL|IL12B|IL21|CNTFR|BMPR1B|LIFR|TSLP|CCR8|AMH|TNFRSF18|IL19|IFNL1|IFNL2|IFNL3|IL20|ACVR1C|INHBA|IFNB1|CCL28|PPBP|TNFRSF9|CXCR5|CX3CL1|CCL20|GDF15|CCL24|GDF10|IL17D|TGFBR2|IL36RN|BMP8A|IL17B|IL17C|CCL14|LEPR|CCL21|IL33|CXCL11|CXCL10|CXCL13|CCL23|CXCL17|CCL11|LEP|CXCL2|BMP3|BMP2|CCL16|LTB|CXCL9|IL21R|CSF3|IL6|PF4	http://www.genome.jp/kegg-bin/show_pathway?hsa04060/hsa:643%09red/hsa:3569%09red/hsa:50615%09red/hsa:3953%09red/hsa:3952%09red/hsa:3977%09red/hsa:3627%09red/hsa:284340%09red/hsa:1440%09red/hsa:10673%09red/hsa:1271%09red/hsa:53342%09red/hsa:29949%09red/hsa:4283%09red/hsa:3604%09red/hsa:6354%09red/hsa:56477%09red/hsa:6369%09red/hsa:6368%09red/hsa:3593%09red/hsa:2920%09red/hsa:6364%09red/hsa:27190%0…
Viral carcinogenesis	KEGG PATHWAY	hsa05203	39	201	6.82786e-16	1.37643e-13	HIST1H4B|HIST1H4A|HIST1H4E|HIST1H4D|HIST1H4K|HIST1H4J|HIST1H4I|HIST1H4H|HIST1H4L|HIST2H2BF|HIST2H2BE|CCR8|HIST2H4A|HIST1H2BO|CCNA2|CCNE2|EGR3|CCNE1|GSN|CDKN2A|CREB5|HIST1H2BD|HIST1H2BE|HIST1H2BF|HIST1H2BG|HIST3H2BB|HPN|HIST1H2BB|HIST1H2BC|HIST1H2BL|HIST1H2BM|EGR2|HIST1H2BH|HIST1H2BI|HIST1H2BJ|HIST1H2BK|CDC20|CDK1|CREB3L1	http://www.genome.jp/kegg-bin/show_pathway?hsa05203/hsa:983%09red/hsa:1237%09red/hsa:9586%09red/hsa:8294%09red/hsa:8339%09red/hsa:8359%09red/hsa:8370%09red/hsa:90993%09red/hsa:128312%09red/hsa:9134%09red/hsa:1959%09red/hsa:3249%09red/hsa:991%09red/hsa:8349%09red/hsa:8348%09red/hsa:890%09red/hsa:440689%09red/hsa:8345%09red/hsa:8344%09red/hsa:8346%09red/hsa:8340%09red/hsa:898%09red/hsa:8342%09red/h…
PI3K-Akt signaling pathway	KEGG PATHWAY	hsa04151	49	354	2.07885e-14	3.1792e-12	PCK1|GHR|ITGA7|GNG13|IBSP|CSF3|CCNE2|COL2A1|CCNE1|TNXB|GNG11|NTRK2|IFNB1|RELN|ANGPT1|ANGPT4|FIGF|IGF1|NTF4|CD19|TNR|COMP|CREB5|COL1A1|EFNA2|PPP2R2C|COL9A1|FGFR3|GYS2|FGF5|FGF4|FGF2|FGF1|TCL1B|TCL1A|SGK2|FN1|KIT|IL6|GNG4|CREB3L1|GNG2|GNG3|GNGT1|EIF4E1B|VWF|FGF21|COL6A5|COL6A6	http://www.genome.jp/kegg-bin/show_pathway?hsa04151/hsa:3569%09red/hsa:3381%09red/hsa:9586%09red/hsa:1311%09red/hsa:3815%09red/hsa:2792%09red/hsa:54331%09red/hsa:4909%09red/hsa:1277%09red/hsa:1440%09red/hsa:90993%09red/hsa:8115%09red/hsa:7450%09red/hsa:1297%09red/hsa:3679%09red/hsa:3456%09red/hsa:3479%09red/hsa:2250%09red/hsa:2335%09red/hsa:2277%09red/hsa:9134%09red/hsa:5649%09red/hsa:7143%09red/…
Metabolic pathways	KEGG PATHWAY	hsa01100	113	1433	4.58158e-14	6.7731e-12	AOC1|AOC3|AOC2|CDO1|GSTA3|P4HA3|MOCS1|PCK1|PNLIP|DMGDH|PAH|PYCR1|HPSE2|SQLE|ITPKA|GPAM|NDST4|PLCZ1|DCT|PYGM|TYRP1|B3GALT1|ACSM2A|ACSM2B|ENTPD8|PIK3C2G|CYP3A4|PAFAH1B3|COX6A2|ACSL1|URAD|NMRK2|GPLD1|ALDH2|ACADL|COX7B2|IRG1|GLDC|DGAT2|CYP26B1|PGK2|COX6C|CHST9|GYS2|TK1|ACO1|COX7A1|CYP1A2|GPX3|PLA2G4D|INMT|ACSM5|AMPD1|MIOX|PDE11A|GAD1|AKR1C3|ASPA|CYP2B6|PDE3B|ALAS2|MGAT5B|IL4I1|HPD|ACACB|PLA2G2F|CYP1A…	http://www.genome.jp/kegg-bin/show_pathway?hsa01100/hsa:200576%09red/hsa:314%09red/hsa:316%09red/hsa:5140%09red/hsa:250%09red/hsa:251%09red/hsa:1339%09red/hsa:1036%09red/hsa:1638%09red/hsa:84649%09red/hsa:23743%09red/hsa:48%09red/hsa:1589%09red/hsa:5232%09red/hsa:126%09red/hsa:124%09red/hsa:125%09red/hsa:9365%09red/hsa:2529%09red/hsa:11343%09red/hsa:27231%09red/hsa:2878%09red/hsa:3242%09red/hsa:6…
Morphine addiction	KEGG PATHWAY	hsa05032	24	91	9.49361e-13	1.16956e-10	GABRG2|GABRG1|GABRA5|GABRA4|PDE11A|PDE3B|GABRA1|GABBR2|GABRA3|GNAI1|PDE1C|CACNA1B|GNG11|GNG13|KCNJ3|KCNJ6|GABRQ|PDE2A|GNG4|GNG2|GNG3|GNGT1|GABRE|GABRD	http://www.genome.jp/kegg-bin/show_pathway?hsa05032/hsa:9568%09red/hsa:5140%09red/hsa:2791%09red/hsa:2792%09red/hsa:54331%09red/hsa:50940%09red/hsa:2566%09red/hsa:2565%09red/hsa:2564%09red/hsa:2563%09red/hsa:5137%09red/hsa:774%09red/hsa:5138%09red/hsa:2786%09red/hsa:2785%09red/hsa:55879%09red/hsa:2770%09red/hsa:51764%09red/hsa:2558%09red/hsa:3763%09red/hsa:3760%09red/hsa:2556%09red/hsa:2557%09red…
IL-17 signaling pathway	KEGG PATHWAY	hsa04657	24	93	1.41039e-12	1.64607e-10	CCL7|MMP13|FOSB|MAPK15|CLGN|MAPK10|MUC5B|FOS|S100A9|S100A8|CCL20|S100A7|IL17D|IL17B|IL17C|MUC5AC|CXCL10|CCL11|CXCL2|CSF3|IL6|MMP9|MMP3|MMP1	http://www.genome.jp/kegg-bin/show_pathway?hsa04657/hsa:3569%09red/hsa:727897%09red/hsa:3627%09red/hsa:1440%09red/hsa:53342%09red/hsa:4586%09red/hsa:2920%09red/hsa:6364%09red/hsa:27190%09red/hsa:5602%09red/hsa:6279%09red/hsa:2353%09red/hsa:2354%09red/hsa:4322%09red/hsa:225689%09red/hsa:27189%09red/hsa:4318%09red/hsa:6278%09red/hsa:4312%09red/hsa:4314%09red/hsa:6354%09red/hsa:6356%09red/hsa:6280%0…
cAMP signaling pathway	KEGG PATHWAY	hsa04024	35	214	1.64033e-12	1.86535e-10	FXYD1|GRIA2|GRIA4|MAPK10|GABBR2|ADCYAP1R1|GNAI1|AMH|VIP|PDE3B|SSTR2|TNNI3|ATP1A3|EDN3|EDN2|NPR1|LIPE|FOS|CREB5|HCAR3|HCAR2|HTR4|HCN2|CNGA2|CALML5|GRIN2B|SSTR1|ADRB2|CREB3L1|SSTR5|ATP1A2|GRIN2D|OXTR|HTR1D|HTR1E	http://www.genome.jp/kegg-bin/show_pathway?hsa04024/hsa:9568%09red/hsa:5140%09red/hsa:5348%09red/hsa:5021%09red/hsa:154%09red/hsa:7432%09red/hsa:2904%09red/hsa:90993%09red/hsa:3991%09red/hsa:2906%09red/hsa:9586%09red/hsa:3352%09red/hsa:5602%09red/hsa:3354%09red/hsa:2353%09red/hsa:338442%09red/hsa:1260%09red/hsa:2893%09red/hsa:6752%09red/hsa:2891%09red/hsa:478%09red/hsa:51806%09red/hsa:268%09red/h…
Nicotine addiction	KEGG PATHWAY	hsa05033	17	40	4.10851e-12	4.55531e-10	GRIN2B|GRIA2|GABRG2|GABRG1|SLC17A7|GABRQ|GRIA4|CHRNA4|GABRA5|CHRNA6|GRIN2D|GABRA4|GABRE|GABRD|GABRA1|CACNA1B|GABRA3	http://www.genome.jp/kegg-bin/show_pathway?hsa05033/hsa:2566%09red/hsa:2565%09red/hsa:2564%09red/hsa:2563%09red/hsa:57030%09red/hsa:774%09red/hsa:8973%09red/hsa:2893%09red/hsa:2891%09red/hsa:55879%09red/hsa:2558%09red/hsa:2904%09red/hsa:1137%09red/hsa:2906%09red/hsa:2556%09red/hsa:2557%09red/hsa:2554%09red
Cell cycle	KEGG PATHWAY	hsa04110	26	124	9.77004e-12	9.84776e-10	MAD2L1|BUB1B|PLK1|PKMYT1|SMC1B|CDC6|CCNA2|CCNE2|CCNE1|TTK|ORC6|ESPL1|PTTG1|CDKN2A|BUB1|CDC25C|CDC25A|ORC1|CCNB2|CCNB1|E2F2|E2F1|CDC20|CDK1|CDC45|CDKN1C	http://www.genome.jp/kegg-bin/show_pathway?hsa04110/hsa:983%09red/hsa:9088%09red/hsa:701%09red/hsa:5347%09red/hsa:9700%09red/hsa:7272%09red/hsa:8318%09red/hsa:4998%09red/hsa:995%09red/hsa:1870%09red/hsa:9134%09red/hsa:9133%09red/hsa:4085%09red/hsa:993%09red/hsa:991%09red/hsa:990%09red/hsa:890%09red/hsa:891%09red/hsa:898%09red/hsa:27127%09red/hsa:23594%09red/hsa:699%09red/hsa:1029%09red/hsa:1028%0…
PPAR signaling pathway	KEGG PATHWAY	hsa03320	20	76	7.53888e-11	6.4298e-09	AQP7|RXRG|OLR1|MMP1|ADIPOQ|ACSL1|FABP4|CD36|FABP6|PPARG|CLGN|PCK1|APOC3|SORBS1|PLIN4|SLC27A6|ACADL|APOA1|APOA2|PLIN1	http://www.genome.jp/kegg-bin/show_pathway?hsa03320/hsa:6258%09red/hsa:33%09red/hsa:345%09red/hsa:5105%09red/hsa:9370%09red/hsa:336%09red/hsa:948%09red/hsa:4973%09red/hsa:2180%09red/hsa:364%09red/hsa:5346%09red/hsa:2172%09red/hsa:10580%09red/hsa:2167%09red/hsa:4312%09red/hsa:5468%09red/hsa:729359%09red/hsa:335%09red/hsa:28965%09red
Dopaminergic synapse	KEGG PATHWAY	hsa04728	25	131	1.40028e-10	1.15005e-08	GRIA2|GRIA4|MAPK10|GNAI1|CACNA1B|GNG11|GNG13|TH|MAOA|FOS|CREB5|PPP2R2C|KCNJ3|CALY|KCNJ6|CALML5|GRIN2B|GNG4|CREB3L1|GNG2|GNG3|GNGT1|SCN1A|GNAL|SLC18A1	http://www.genome.jp/kegg-bin/show_pathway?hsa04728/hsa:9586%09red/hsa:2791%09red/hsa:2792%09red/hsa:54331%09red/hsa:2904%09red/hsa:90993%09red/hsa:4128%09red/hsa:50632%09red/hsa:7054%09red/hsa:6323%09red/hsa:5602%09red/hsa:2353%09red/hsa:774%09red/hsa:2893%09red/hsa:2786%09red/hsa:2891%09red/hsa:2785%09red/hsa:51806%09red/hsa:5522%09red/hsa:2770%09red/hsa:51764%09red/hsa:2774%09red/hsa:6570%09re…
Pathways in cancer	KEGG PATHWAY	hsa05200	53	530	1.61032e-10	1.27532e-08	FGF1|E2F1|BIRC5|IL12B|RET|GSTA3|CLGN|IGF1|MAPK10|EDNRB|LEF1|GNAI1|HN1|CEBPA|FZD4|ZBTB16|CCNE2|CCNE1|GNG11|GNG13|CTNNA2|TERT|FIGF|TGFBR2|CDKN2A|GNGT1|FOS|CKS2|RXRG|FGFR3|PPARG|DLL3|FGF5|FGF4|FGF2|ARNT2|E2F2|F2|ESR2|BMP2|FN1|GSTM5|CALML5|KIT|IL6|GNG4|GNG2|GNG3|RAD51|MMP9|HLF|MMP1|FGF21	http://www.genome.jp/kegg-bin/show_pathway?hsa05200/hsa:3569%09red/hsa:3815%09red/hsa:2792%09red/hsa:54331%09red/hsa:1050%09red/hsa:332%09red/hsa:1910%09red/hsa:2277%09red/hsa:2940%09red/hsa:2100%09red/hsa:3593%09red/hsa:2949%09red/hsa:4318%09red/hsa:3479%09red/hsa:2250%09red/hsa:2147%09red/hsa:2335%09red/hsa:1870%09red/hsa:9134%09red/hsa:9915%09red/hsa:5602%09red/hsa:26291%09red/hsa:5888%09red/h…
Viral protein interaction with cytokine and cytokine receptor	KEGG PATHWAY	hsa04061	22	100	1.69384e-10	1.31793e-08	CCL7|IL20|PF4|CCR8|CCL28|PPBP|CXCR5|CCL21|CCL20|CCL23|CCL24|IL19|CX3CL1|CXCL11|CXCL10|CXCL13|CCL11|CXCL2|CCL14|CCL16|CXCL9|IL6	http://www.genome.jp/kegg-bin/show_pathway?hsa04061/hsa:643%09red/hsa:3569%09red/hsa:1237%09red/hsa:3627%09red/hsa:10563%09red/hsa:4283%09red/hsa:56477%09red/hsa:6369%09red/hsa:6368%09red/hsa:2920%09red/hsa:6364%09red/hsa:6366%09red/hsa:6360%09red/hsa:5473%09red/hsa:5196%09red/hsa:50604%09red/hsa:29949%09red/hsa:6373%09red/hsa:6376%09red/hsa:6354%09red/hsa:6356%09red/hsa:6358%09red
Protein digestion and absorption	KEGG PATHWAY	hsa04974	21	90	1.72479e-10	1.31887e-08	COL10A1|COL9A1|SLC8A2|COL11A1|CPA2|COL2A1|CPA1|SLC15A1|CPB1|SLC1A1|PRSS1|SLC6A19|ATP1A3|ATP1A2|COL1A1|COL22A1|COL17A1|COL6A5|PGA5|XPNPEP2|COL6A6	http://www.genome.jp/kegg-bin/show_pathway?hsa04974/hsa:1357%09red/hsa:7512%09red/hsa:1280%09red/hsa:6505%09red/hsa:1301%09red/hsa:5222%09red/hsa:1360%09red/hsa:1358%09red/hsa:6564%09red/hsa:6543%09red/hsa:169044%09red/hsa:1277%09red/hsa:256076%09red/hsa:1297%09red/hsa:478%09red/hsa:1300%09red/hsa:340024%09red/hsa:477%09red/hsa:131873%09red/hsa:1308%09red/hsa:5644%09red
Retinol metabolism	KEGG PATHWAY	hsa00830	18	67	4.98668e-10	3.51047e-08	AOX1|CYP1A2|CYP1A1|RPE65|RDH5|CYP2B6|CYP26B1|RDH16|ADH4|ADH1C|HSD17B6|ADH1A|UGT2B28|CYP3A4|ADH1B|ALDH1A1|ALDH1A2|CYP2A6	http://www.genome.jp/kegg-bin/show_pathway?hsa00830/hsa:54490%09red/hsa:316%09red/hsa:8608%09red/hsa:126%09red/hsa:8854%09red/hsa:56603%09red/hsa:6121%09red/hsa:1576%09red/hsa:1548%09red/hsa:8630%09red/hsa:5959%09red/hsa:1544%09red/hsa:125%09red/hsa:1555%09red/hsa:124%09red/hsa:131%09red/hsa:216%09red/hsa:1543%09red
GABAergic synapse	KEGG PATHWAY	hsa04727	20	89	8.21483e-10	5.60504e-08	KCNJ6|GABRG2|GABRG1|GABRQ|GNG11|GNG13|GABRA5|GNG4|CACNA1B|GNG2|GNG3|GNGT1|GABRA4|GABRE|GABRD|GABBR2|GABRA1|GAD1|GABRA3|GNAI1	http://www.genome.jp/kegg-bin/show_pathway?hsa04727/hsa:2566%09red/hsa:9568%09red/hsa:2564%09red/hsa:51764%09red/hsa:2571%09red/hsa:774%09red/hsa:2791%09red/hsa:2792%09red/hsa:2565%09red/hsa:2770%09red/hsa:2785%09red/hsa:54331%09red/hsa:55879%09red/hsa:2558%09red/hsa:3763%09red/hsa:2563%09red/hsa:2786%09red/hsa:2556%09red/hsa:2557%09red/hsa:2554%09red
Transcriptional misregulation in cancer	KEGG PATHWAY	hsa05202	28	186	1.40452e-09	9.43796e-08	ELANE|SSX1|CEBPA|ZBTB16|TGFBR2|WT1|IGF1|NR4A3|RXRG|HIST1H3B|HIST1H3C|PAX7|HIST2H3D|HIST1H3F|HIST1H3G|HIST1H3D|HIST1H3J|HIST1H3H|HIST1H3I|ARNT2|ETV7|PPARG|TLX1|TLX3|IL6|MMP9|MMP3|TSPAN7	http://www.genome.jp/kegg-bin/show_pathway?hsa05202/hsa:30012%09red/hsa:8358%09red/hsa:3569%09red/hsa:8352%09red/hsa:8351%09red/hsa:8356%09red/hsa:8357%09red/hsa:8354%09red/hsa:8355%09red/hsa:7102%09red/hsa:6258%09red/hsa:653604%09red/hsa:8968%09red/hsa:3479%09red/hsa:1050%09red/hsa:9915%09red/hsa:7490%09red/hsa:1991%09red/hsa:51513%09red/hsa:8013%09red/hsa:3195%09red/hsa:4318%09red/hsa:6756%09re…
Calcium signaling pathway	KEGG PATHWAY	hsa04020	28	193	2.92222e-09	1.85143e-07	PTGFR|PLCZ1|NTSR1|EDNRB|P2RX6|CCKBR|LHCGR|TRDN|CASQ2|PDE1C|CACNA1B|ITPKA|HTR2A|SLC8A2|CACNA1H|MYLK2|HTR4|TACR3|TACR1|ADRA1A|MYLK|CALML5|ADRB2|ADRB3|GRIN2D|OXTR|GNAL|RYR3	http://www.genome.jp/kegg-bin/show_pathway?hsa04020/hsa:155%09red/hsa:154%09red/hsa:3973%09red/hsa:6870%09red/hsa:3706%09red/hsa:845%09red/hsa:2906%09red/hsa:887%09red/hsa:4638%09red/hsa:85366%09red/hsa:1910%09red/hsa:6543%09red/hsa:3356%09red/hsa:5021%09red/hsa:6869%09red/hsa:10345%09red/hsa:5137%09red/hsa:774%09red/hsa:146%09red/hsa:51806%09red/hsa:2774%09red/hsa:6263%09red/hsa:9127%09red/hsa:3…
Retrograde endocannabinoid signaling	KEGG PATHWAY	hsa04723	24	148	5.67448e-09	3.44744e-07	GRIA2|GABRG2|GABRG1|MGLL|GRIA4|MAPK10|GABRA5|GABRA4|GABRA1|GABRA3|GNAI1|CACNA1B|GNG11|GNG13|KCNJ3|KCNJ6|SLC17A7|GABRQ|GNG4|GNG2|GNG3|GNGT1|GABRE|GABRD	http://www.genome.jp/kegg-bin/show_pathway?hsa04723/hsa:2791%09red/hsa:2792%09red/hsa:54331%09red/hsa:5602%09red/hsa:2566%09red/hsa:2565%09red/hsa:2564%09red/hsa:2563%09red/hsa:774%09red/hsa:11343%09red/hsa:2893%09red/hsa:2786%09red/hsa:2891%09red/hsa:55879%09red/hsa:2785%09red/hsa:2770%09red/hsa:51764%09red/hsa:57030%09red/hsa:2558%09red/hsa:3763%09red/hsa:3760%09red/hsa:2556%09red/hsa:2557%09re…
Tyrosine metabolism	KEGG PATHWAY	hsa00350	13	36	6.80469e-09	3.97089e-07	AOX1|AOC3|AOC2|TH|TYRP1|ADH4|MAOA|ADH1C|ADH1B|ADH1A|DCT|IL4I1|HPD	http://www.genome.jp/kegg-bin/show_pathway?hsa00350/hsa:314%09red/hsa:126%09red/hsa:316%09red/hsa:1638%09red/hsa:259307%09red/hsa:8639%09red/hsa:3242%09red/hsa:7054%09red/hsa:7306%09red/hsa:131%09red/hsa:4128%09red/hsa:124%09red/hsa:125%09red
Taste transduction	KEGG PATHWAY	hsa04742	18	83	9.19169e-09	5.03273e-07	HTR1E|CALHM1|HTR1D|PDE1C|GABRA4|GNG13|TAS1R3|GABRA5|SCN2A|HTR3A|GRM4|TRPM5|GNAT3|SCN9A|GABRA1|GABBR2|GABRA3|SCN3A	http://www.genome.jp/kegg-bin/show_pathway?hsa04742/hsa:29850%09red/hsa:9568%09red/hsa:51764%09red/hsa:5137%09red/hsa:3354%09red/hsa:2558%09red/hsa:3352%09red/hsa:346562%09red/hsa:255022%09red/hsa:2554%09red/hsa:6326%09red/hsa:6328%09red/hsa:3359%09red/hsa:6335%09red/hsa:2556%09red/hsa:2557%09red/hsa:2914%09red/hsa:83756%09red
Circadian entrainment	KEGG PATHWAY	hsa04713	19	97	1.52339e-08	7.9485e-07	CACNA1H|KCNJ3|GNGT1|FOS|GRIA2|RYR3|KCNJ6|GNG4|GRIA4|GNG13|GRIN2B|GNG3|PER1|GNG2|CALML5|GRIN2D|ADCYAP1R1|GNG11|GNAI1	http://www.genome.jp/kegg-bin/show_pathway?hsa04713/hsa:2770%09red/hsa:2906%09red/hsa:51764%09red/hsa:2791%09red/hsa:2792%09red/hsa:51806%09red/hsa:2893%09red/hsa:54331%09red/hsa:2891%09red/hsa:2786%09red/hsa:6263%09red/hsa:117%09red/hsa:2785%09red/hsa:5187%09red/hsa:2904%09red/hsa:8912%09red/hsa:2353%09red/hsa:3760%09red/hsa:3763%09red
Metabolism of xenobiotics by cytochrome P450	KEGG PATHWAY	hsa00980	17	76	1.58668e-08	8.18249e-07	CYP1A1|CYP1A2|AKR7A3|CYP2F1|CYP2A13|ADH4|CYP2B6|GSTM5|GSTA3|ADH1C|CYP2A6|ADH1A|UGT2B28|CYP3A4|ADH1B|AKR1C1|HSD11B1	http://www.genome.jp/kegg-bin/show_pathway?hsa00980/hsa:2940%09red/hsa:1645%09red/hsa:22977%09red/hsa:126%09red/hsa:54490%09red/hsa:2949%09red/hsa:131%09red/hsa:1576%09red/hsa:1548%09red/hsa:1572%09red/hsa:1544%09red/hsa:1555%09red/hsa:125%09red/hsa:1553%09red/hsa:3290%09red/hsa:124%09red/hsa:1543%09red
Chemokine signaling pathway	KEGG PATHWAY	hsa04062	26	190	3.0661e-08	1.4943e-06	CCL7|PF4|CCR8|GNAI1|GNG11|GNG13|CCL28|PPBP|CXCR5|CCL21|CCL20|CCL23|CCL24|CX3CL1|CXCL11|CXCL10|CXCL13|CCL11|CXCL2|CCL14|CCL16|CXCL9|GNG4|GNG2|GNG3|GNGT1	http://www.genome.jp/kegg-bin/show_pathway?hsa04062/hsa:643%09red/hsa:1237%09red/hsa:2791%09red/hsa:2792%09red/hsa:3627%09red/hsa:54331%09red/hsa:4283%09red/hsa:56477%09red/hsa:6369%09red/hsa:6368%09red/hsa:2920%09red/hsa:6364%09red/hsa:6366%09red/hsa:6360%09red/hsa:5473%09red/hsa:5196%09red/hsa:2786%09red/hsa:2785%09red/hsa:10563%09red/hsa:2770%09red/hsa:51764%09red/hsa:6373%09red/hsa:6376%09red…
Oocyte meiosis	KEGG PATHWAY	hsa04114	21	128	4.17035e-08	1.96761e-06	CCNB2|CCNB1|SMC1B|BUB1|FBXO43|PLK1|CCNE2|PLCZ1|SPDYC|CCNE1|CDC25C|SGOL1|CALML5|CDC20|CDK1|MAD2L1|ESPL1|AURKA|IGF1|PTTG1|PKMYT1	http://www.genome.jp/kegg-bin/show_pathway?hsa04114/hsa:9088%09red/hsa:286151%09red/hsa:991%09red/hsa:983%09red/hsa:995%09red/hsa:387778%09red/hsa:891%09red/hsa:5347%09red/hsa:9700%09red/hsa:51806%09red/hsa:151648%09red/hsa:699%09red/hsa:898%09red/hsa:27127%09red/hsa:9134%09red/hsa:6790%09red/hsa:9133%09red/hsa:89869%09red/hsa:9232%09red/hsa:4085%09red/hsa:3479%09red
Ras signaling pathway	KEGG PATHWAY	hsa04014	28	232	1.01741e-07	4.29736e-06	FGF21|MAPK10|GNG11|NTRK2|GNG13|ANGPT1|ANGPT4|FIGF|IGF1|NTF4|MRAS|EFNA2|PLA2G2F|FGF5|FGF4|FGFR3|FGF1|PLA2G4D|FGF2|CALML5|KIT|GRIN2B|GNG4|GNG2|GNG3|GNGT1|PAK7|PAK3	http://www.genome.jp/kegg-bin/show_pathway?hsa04014/hsa:5063%09red/hsa:3815%09red/hsa:57144%09red/hsa:54331%09red/hsa:4909%09red/hsa:2904%09red/hsa:64600%09red/hsa:3479%09red/hsa:2250%09red/hsa:2277%09red/hsa:5602%09red/hsa:26291%09red/hsa:2792%09red/hsa:4915%09red/hsa:284%09red/hsa:2786%09red/hsa:2785%09red/hsa:51806%09red/hsa:51378%09red/hsa:2791%09red/hsa:2249%09red/hsa:51764%09red/hsa:2246%09…
Serotonergic synapse	KEGG PATHWAY	hsa04726	19	115	1.64358e-07	6.68741e-06	KCNJ3|HTR1E|KCNJ6|SLC6A4|GNG3|CACNA1B|HTR4|GNG13|MAOA|GNG2|GNG4|GNGT1|HTR3A|HTR1D|HTR2A|SLC18A1|PLA2G4D|GNG11|GNAI1	http://www.genome.jp/kegg-bin/show_pathway?hsa04726/hsa:2770%09red/hsa:51764%09red/hsa:3360%09red/hsa:774%09red/hsa:2791%09red/hsa:2792%09red/hsa:54331%09red/hsa:3760%09red/hsa:2786%09red/hsa:3352%09red/hsa:283748%09red/hsa:3356%09red/hsa:6532%09red/hsa:3354%09red/hsa:6570%09red/hsa:3763%09red/hsa:3359%09red/hsa:2785%09red/hsa:4128%09red
Relaxin signaling pathway	KEGG PATHWAY	hsa04926	20	130	2.19426e-07	8.46223e-06	FIGF|TGFBR2|MMP9|MMP13|RXFP3|FOS|CLGN|CREB5|GNG13|GNG4|CREB3L1|MAPK10|GNG3|GNGT1|COL1A1|GNG2|EDNRB|MMP1|GNG11|GNAI1	http://www.genome.jp/kegg-bin/show_pathway?hsa04926/hsa:2770%09red/hsa:2353%09red/hsa:51764%09red/hsa:7048%09red/hsa:9586%09red/hsa:4312%09red/hsa:2791%09red/hsa:2792%09red/hsa:54331%09red/hsa:2785%09red/hsa:2786%09red/hsa:2277%09red/hsa:1277%09red/hsa:4318%09red/hsa:5602%09red/hsa:1910%09red/hsa:51289%09red/hsa:90993%09red/hsa:4322%09red
Focal adhesion	KEGG PATHWAY	hsa04510	25	199	2.43971e-07	9.24794e-06	ITGA7|MAPK10|IBSP|CAV3|CAV1|CAV2|TNXB|RELN|PPP1R12B|SCT|FIGF|IGF1|TNR|COMP|MYLK2|COL9A1|PAK3|COL2A1|FN1|MYLK|COL1A1|VWF|PAK7|COL6A5|COL6A6	http://www.genome.jp/kegg-bin/show_pathway?hsa04510/hsa:5063%09red/hsa:3381%09red/hsa:1311%09red/hsa:57144%09red/hsa:1277%09red/hsa:7450%09red/hsa:4638%09red/hsa:85366%09red/hsa:3479%09red/hsa:2335%09red/hsa:2277%09red/hsa:5649%09red/hsa:2317%09red/hsa:7143%09red/hsa:7148%09red/hsa:5602%09red/hsa:3679%09red/hsa:1297%09red/hsa:857%09red/hsa:858%09red/hsa:859%09red/hsa:4660%09red/hsa:1280%09red/hsa…
ECM-receptor interaction	KEGG PATHWAY	hsa04512	16	86	3.77253e-07	1.40598e-05	HMMR|FN1|TNR|COL6A5|TNXB|CD36|ITGA7|FREM1|RELN|COL2A1|COL1A1|VWF|COL9A1|IBSP|COMP|COL6A6	http://www.genome.jp/kegg-bin/show_pathway?hsa04512/hsa:7450%09red/hsa:1297%09red/hsa:3381%09red/hsa:3679%09red/hsa:1280%09red/hsa:1311%09red/hsa:948%09red/hsa:256076%09red/hsa:2335%09red/hsa:1277%09red/hsa:5649%09red/hsa:131873%09red/hsa:7143%09red/hsa:158326%09red/hsa:7148%09red/hsa:3161%09red
Glutamatergic synapse	KEGG PATHWAY	hsa04724	18	114	6.22093e-07	2.15546e-05	KCNJ3|GNGT1|GRIA2|SLC17A7|GNG11|GRIA4|GNG13|GRIN2B|GNG4|GNG2|GNG3|GRIN2D|GRM4|GRM8|SLC1A6|PLA2G4D|SLC1A1|GNAI1	http://www.genome.jp/kegg-bin/show_pathway?hsa04724/hsa:2770%09red/hsa:51764%09red/hsa:57030%09red/hsa:6505%09red/hsa:2791%09red/hsa:2792%09red/hsa:6511%09red/hsa:2893%09red/hsa:54331%09red/hsa:2891%09red/hsa:2786%09red/hsa:2918%09red/hsa:283748%09red/hsa:2785%09red/hsa:2904%09red/hsa:3760%09red/hsa:2906%09red/hsa:2914%09red
Drug metabolism - cytochrome P450	KEGG PATHWAY	hsa00982	14	72	1.25781e-06	4.01323e-05	FMO2|AOX1|CYP1A2|ADH4|CYP2B6|GSTM5|GSTA3|MAOA|ADH1C|CYP2A6|ADH1A|UGT2B28|CYP3A4|ADH1B	http://www.genome.jp/kegg-bin/show_pathway?hsa00982/hsa:2940%09red/hsa:316%09red/hsa:54490%09red/hsa:2949%09red/hsa:126%09red/hsa:2327%09red/hsa:1576%09red/hsa:1548%09red/hsa:1544%09red/hsa:1555%09red/hsa:131%09red/hsa:4128%09red/hsa:124%09red/hsa:125%09red
Jak-STAT signaling pathway	KEGG PATHWAY	hsa04630	21	162	1.38035e-06	4.34173e-05	IL17D|AOX1|IFNL2|IFNL3|GHR|IL21|IFNL1|GFAP|IL21R|IL12B|LEPR|IL6|IL20|FHL1|TSLP|LIFR|LEP|CNTFR|IFNB1|CSF3|IL19	http://www.genome.jp/kegg-bin/show_pathway?hsa04630/hsa:3569%09red/hsa:2670%09red/hsa:316%09red/hsa:3953%09red/hsa:3593%09red/hsa:3952%09red/hsa:3977%09red/hsa:3456%09red/hsa:1271%09red/hsa:50604%09red/hsa:1440%09red/hsa:59067%09red/hsa:282618%09red/hsa:50615%09red/hsa:29949%09red/hsa:85480%09red/hsa:2273%09red/hsa:53342%09red/hsa:282616%09red/hsa:282617%09red/hsa:2690%09red
Progesterone-mediated oocyte maturation	KEGG PATHWAY	hsa04914	16	99	1.96495e-06	5.96887e-05	CCNB2|CCNB1|MAD2L1|BUB1|PLK1|CDC25A|CDC25C|PKMYT1|PDE3B|CDK1|IGF1|MAPK10|AURKA|CCNA2|SPDYC|GNAI1	http://www.genome.jp/kegg-bin/show_pathway?hsa04914/hsa:993%09red/hsa:995%09red/hsa:2770%09red/hsa:983%09red/hsa:5140%09red/hsa:387778%09red/hsa:890%09red/hsa:891%09red/hsa:5347%09red/hsa:3479%09red/hsa:699%09red/hsa:6790%09red/hsa:5602%09red/hsa:9133%09red/hsa:4085%09red/hsa:9088%09red
Chemical carcinogenesis	KEGG PATHWAY	hsa05204	14	82	4.82766e-06	0.00012898	CYP1A1|CYP1A2|ADH4|CYP2A13|GSTM5|GSTA3|ADH1C|CYP2A6|ADH1A|UGT2B28|CYP3A4|ADH1B|AKR1C2|HSD11B1	http://www.genome.jp/kegg-bin/show_pathway?hsa05204/hsa:54490%09red/hsa:2940%09red/hsa:126%09red/hsa:1646%09red/hsa:2949%09red/hsa:131%09red/hsa:1576%09red/hsa:1548%09red/hsa:1544%09red/hsa:3290%09red/hsa:125%09red/hsa:1553%09red/hsa:124%09red/hsa:1543%09red
Adrenergic signaling in cardiomyocytes	KEGG PATHWAY	hsa04261	19	149	5.34158e-06	0.000139352	PPP1R1A|ADRA1A|SCN5A|MYH6|CALML5|CREB3L1|CREB5|TNNI3|SLC8A2|PPP2R2C|ADRB2|KCNE1|ATP1A3|ATP1A2|CACNG1|SCN4B|CACNG4|CACNG6|GNAI1	http://www.genome.jp/kegg-bin/show_pathway?hsa04261/hsa:5522%09red/hsa:2770%09red/hsa:90993%09red/hsa:3753%09red/hsa:9586%09red/hsa:786%09red/hsa:146%09red/hsa:154%09red/hsa:27092%09red/hsa:5502%09red/hsa:6543%09red/hsa:7137%09red/hsa:4624%09red/hsa:478%09red/hsa:59285%09red/hsa:51806%09red/hsa:477%09red/hsa:6330%09red/hsa:6331%09red
cGMP-PKG signaling pathway	KEGG PATHWAY	hsa04022	20	167	7.16341e-06	0.000182585	ADRA1A|NPR1|SLC8A2|MYH6|CREB5|ADRB3|MYLK2|MYLK|CALML5|PDE2A|ADRB2|CREB3L1|ATP1A3|ATP1A2|KCNMB1|GATA4|PDE3B|EDNRB|OPRD1|GNAI1	http://www.genome.jp/kegg-bin/show_pathway?hsa04022/hsa:4638%09red/hsa:2626%09red/hsa:85366%09red/hsa:5140%09red/hsa:6543%09red/hsa:9586%09red/hsa:5138%09red/hsa:146%09red/hsa:154%09red/hsa:90993%09red/hsa:2770%09red/hsa:1910%09red/hsa:51806%09red/hsa:4624%09red/hsa:478%09red/hsa:4985%09red/hsa:4881%09red/hsa:3779%09red/hsa:477%09red/hsa:155%09red
Cardiac muscle contraction	KEGG PATHWAY	hsa04260	14	86	7.85234e-06	0.00019787	TRDN|SLC8A2|MYH6|CASQ2|CACNG6|COX6A2|ATP1A3|ATP1A2|COX7A1|CACNG1|TNNI3|CACNG4|COX6C|COX7B2	http://www.genome.jp/kegg-bin/show_pathway?hsa04260/hsa:1346%09red/hsa:1345%09red/hsa:786%09red/hsa:170712%09red/hsa:27092%09red/hsa:59285%09red/hsa:6543%09red/hsa:845%09red/hsa:7137%09red/hsa:4624%09red/hsa:478%09red/hsa:10345%09red/hsa:1339%09red/hsa:477%09red
Cholinergic synapse	KEGG PATHWAY	hsa04725	16	112	8.08112e-06	0.000201347	KCNJ3|KCNJ6|KCNJ4|CACNA1B|FOS|GNG4|CREB5|GNG13|CHRNA4|CHRNA6|CREB3L1|GNG2|GNG3|GNGT1|GNG11|GNAI1	http://www.genome.jp/kegg-bin/show_pathway?hsa04725/hsa:2770%09red/hsa:90993%09red/hsa:51764%09red/hsa:2353%09red/hsa:9586%09red/hsa:774%09red/hsa:8973%09red/hsa:2792%09red/hsa:54331%09red/hsa:2785%09red/hsa:2786%09red/hsa:2791%09red/hsa:3763%09red/hsa:1137%09red/hsa:3761%09red/hsa:3760%09red
Tryptophan metabolism	KEGG PATHWAY	hsa00380	10	42	8.92839e-06	0.000220318	AOC1|CYP1A1|CYP1A2|TDO2|INMT|AOX1|ALDH2|CAT|MAOA|IL4I1	http://www.genome.jp/kegg-bin/show_pathway?hsa00380/hsa:316%09red/hsa:26%09red/hsa:259307%09red/hsa:11185%09red/hsa:6999%09red/hsa:847%09red/hsa:1544%09red/hsa:217%09red/hsa:4128%09red/hsa:1543%09red
Phenylalanine metabolism	KEGG PATHWAY	hsa00360	7	17	1.10534e-05	0.000259375	AOC3|AOC2|MAOA|GLYAT|PAH|IL4I1|HPD	http://www.genome.jp/kegg-bin/show_pathway?hsa00360/hsa:314%09red/hsa:259307%09red/hsa:3242%09red/hsa:10249%09red/hsa:5053%09red/hsa:8639%09red/hsa:4128%09red
Amphetamine addiction	KEGG PATHWAY	hsa05031	12	68	1.69247e-05	0.000377731	TH|FOS|GRIA2|FOSB|CALML5|GRIN2B|MAOA|CREB3L1|GRIA4|GRIN2D|SLC18A1|CREB5	http://www.genome.jp/kegg-bin/show_pathway?hsa05031/hsa:7054%09red/hsa:2353%09red/hsa:9586%09red/hsa:2893%09red/hsa:2891%09red/hsa:2906%09red/hsa:51806%09red/hsa:6570%09red/hsa:2904%09red/hsa:90993%09red/hsa:2354%09red/hsa:4128%09red
AMPK signaling pathway	KEGG PATHWAY	hsa04152	16	120	1.75341e-05	0.000388818	PCK1|LIPE|ACACB|PFKFB1|CREB5|SLC2A4|CD36|LEPR|LEP|PPARG|GYS2|PPP2R2C|IGF1|CCNA2|ADIPOQ|CREB3L1	http://www.genome.jp/kegg-bin/show_pathway?hsa04152/hsa:5522%09red/hsa:3991%09red/hsa:9586%09red/hsa:32%09red/hsa:890%09red/hsa:3953%09red/hsa:9370%09red/hsa:3479%09red/hsa:2998%09red/hsa:3952%09red/hsa:948%09red/hsa:6517%09red/hsa:5105%09red/hsa:5207%09red/hsa:5468%09red/hsa:90993%09red
Gastric cancer	KEGG PATHWAY	hsa05226	18	149	1.81369e-05	0.000398204	CCNE1|TGFBR2|TERT|FZD4|E2F2|E2F1|CCNE2|MUC2|REG4|RXRG|ABCB1|FGF1|FGF5|FGF4|LEF1|FGF2|CTNNA2|FGF21	http://www.genome.jp/kegg-bin/show_pathway?hsa05226/hsa:4583%09red/hsa:6258%09red/hsa:2249%09red/hsa:83998%09red/hsa:5243%09red/hsa:2246%09red/hsa:2247%09red/hsa:898%09red/hsa:2250%09red/hsa:1870%09red/hsa:9134%09red/hsa:51176%09red/hsa:26291%09red/hsa:1496%09red/hsa:8322%09red/hsa:1869%09red/hsa:7015%09red/hsa:7048%09red
Apelin signaling pathway	KEGG PATHWAY	hsa04371	17	137	2.249e-05	0.000477241	GNG11|SLC8A2|LIPE|RYR3|EGR1|MYLK2|MRAS|CALML5|GNG13|PDE3B|GNG4|GNG2|GNG3|GNGT1|GNAI1|MYLK|PLIN1	http://www.genome.jp/kegg-bin/show_pathway?hsa04371/hsa:3991%09red/hsa:4638%09red/hsa:2770%09red/hsa:85366%09red/hsa:51764%09red/hsa:22808%09red/hsa:5346%09red/hsa:2791%09red/hsa:2792%09red/hsa:54331%09red/hsa:2785%09red/hsa:2786%09red/hsa:6543%09red/hsa:6263%09red/hsa:51806%09red/hsa:5140%09red/hsa:1958%09red
Estrogen signaling pathway	KEGG PATHWAY	hsa04915	17	138	2.44658e-05	0.000516695	KCNJ3|KRT38|ESR2|KCNJ6|FOS|KRT31|KRT20|KRT35|KRT34|KRT37|TFF1|CREB3L1|CALML5|MMP9|GABBR2|CREB5|GNAI1	http://www.genome.jp/kegg-bin/show_pathway?hsa04915/hsa:3886%09red/hsa:2770%09red/hsa:2353%09red/hsa:3881%09red/hsa:9568%09red/hsa:4318%09red/hsa:9586%09red/hsa:3885%09red/hsa:54474%09red/hsa:8687%09red/hsa:2100%09red/hsa:51806%09red/hsa:3763%09red/hsa:3760%09red/hsa:90993%09red/hsa:8688%09red/hsa:7031%09red
MicroRNAs in cancer	KEGG PATHWAY	hsa05206	27	299	2.47811e-05	0.000520873	MIR27A|MIR27B|MIR23A|SPRY2|MIR23B|MIR222|TP63|MIR221|CCNE2|CCNE1|TNXB|ABCB1|CDCA5|CDKN2A|TNR|CDC25C|CDC25A|MIR125B1|IGF2BP1|FGFR3|E2F2|E2F1|KIF23|HN1|MIR143|EZH2|MMP9	http://www.genome.jp/kegg-bin/show_pathway?hsa05206/hsa:10253%09red/hsa:407018%09red/hsa:407007%09red/hsa:407006%09red/hsa:2146%09red/hsa:1870%09red/hsa:9134%09red/hsa:8626%09red/hsa:7143%09red/hsa:4851%09red/hsa:7148%09red/hsa:993%09red/hsa:9493%09red/hsa:995%09red/hsa:406911%09red/hsa:898%09red/hsa:406935%09red/hsa:10642%09red/hsa:113130%09red/hsa:4318%09red/hsa:407010%09red/hsa:407011%09red/hs…
Steroid hormone biosynthesis	KEGG PATHWAY	hsa00140	11	60	2.76462e-05	0.000575639	CYP1A1|CYP1A2|CYP21A2|HSD17B6|UGT2B28|SRD5A2|CYP3A4|HSD11B1|AKR1C1|AKR1C2|AKR1C3	http://www.genome.jp/kegg-bin/show_pathway?hsa00140/hsa:1646%09red/hsa:1645%09red/hsa:8644%09red/hsa:54490%09red/hsa:1589%09red/hsa:1576%09red/hsa:8630%09red/hsa:1544%09red/hsa:6716%09red/hsa:3290%09red/hsa:1543%09red
Cocaine addiction	KEGG PATHWAY	hsa05030	10	49	2.85511e-05	0.000591701	TH|GRIA2|FOSB|GRIN2B|MAOA|CREB3L1|GRIN2D|SLC18A1|CREB5|GNAI1	http://www.genome.jp/kegg-bin/show_pathway?hsa05030/hsa:2770%09red/hsa:90993%09red/hsa:9586%09red/hsa:2891%09red/hsa:7054%09red/hsa:6570%09red/hsa:2904%09red/hsa:2906%09red/hsa:2354%09red/hsa:4128%09red
Human T-cell leukemia virus 1 infection	KEGG PATHWAY	hsa05166	22	219	3.16901e-05	0.000644704	EGR1|BUB1B|MAD2L1|MAPK10|CCNA2|CCNE2|CCNE1|ESPL1|PTTG1|TERT|TGFBR2|CDKN2A|FOS|CREB5|CCNB2|E2F2|E2F1|CDC20|IL6|EGR2|ZFP36|CREB3L1	http://www.genome.jp/kegg-bin/show_pathway?hsa05166/hsa:3569%09red/hsa:9586%09red/hsa:701%09red/hsa:9700%09red/hsa:90993%09red/hsa:7538%09red/hsa:1870%09red/hsa:9134%09red/hsa:5602%09red/hsa:9133%09red/hsa:1959%09red/hsa:4085%09red/hsa:7015%09red/hsa:991%09red/hsa:890%09red/hsa:1958%09red/hsa:898%09red/hsa:2353%09red/hsa:1029%09red/hsa:9232%09red/hsa:1869%09red/hsa:7048%09red
Human papillomavirus infection	KEGG PATHWAY	hsa05165	28	330	4.91329e-05	0.000939243	ITGA7|IBSP|FZD4|CCNE2|COL2A1|CCNE1|TNXB|PARD6B|IFNB1|ISG15|RELN|TERT|TNR|COMP|CREB5|OASL|PPP2R2C|COL9A1|CCNA2|FN1|E2F1|HN1|CREB3L1|COL1A1|VWF|COL6A5|HES6|COL6A6	http://www.genome.jp/kegg-bin/show_pathway?hsa05165/hsa:3381%09red/hsa:9586%09red/hsa:1311%09red/hsa:1277%09red/hsa:90993%09red/hsa:7450%09red/hsa:1297%09red/hsa:3456%09red/hsa:2335%09red/hsa:9134%09red/hsa:5649%09red/hsa:7143%09red/hsa:4851%09red/hsa:7015%09red/hsa:7148%09red/hsa:9636%09red/hsa:890%09red/hsa:55502%09red/hsa:3679%09red/hsa:898%09red/hsa:8322%09red/hsa:84612%09red/hsa:5522%09red/h…
Necroptosis	KEGG PATHWAY	hsa04217	18	162	4.94912e-05	0.000942033	HIST2H2AA4|HIST2H2AC|IFNB1|HIST1H2AM|HIST1H2AL|HIST1H2AH|HIST1H2AI|IL33|MAPK10|HIST1H2AJ|HIST1H2AE|HIST1H2AD|HIST1H2AG|HIST1H2AB|HIST2H2AB|PYGM|HIST3H2A|PLA2G4D	http://www.genome.jp/kegg-bin/show_pathway?hsa04217/hsa:8969%09red/hsa:317772%09red/hsa:5837%09red/hsa:85235%09red/hsa:3456%09red/hsa:92815%09red/hsa:8338%09red/hsa:8329%09red/hsa:283748%09red/hsa:5602%09red/hsa:3012%09red/hsa:3013%09red/hsa:8331%09red/hsa:8332%09red/hsa:723790%09red/hsa:8335%09red/hsa:8336%09red/hsa:90865%09red
Salivary secretion	KEGG PATHWAY	hsa04970	13	90	5.02584e-05	0.000947224	ADRA1A|RYR3|HTN1|CALML5|ADRB2|ADRB3|ATP1A3|ATP1A2|CST2|MUC5B|CST1|CST4|CST5	http://www.genome.jp/kegg-bin/show_pathway?hsa04970/hsa:727897%09red/hsa:1469%09red/hsa:146%09red/hsa:154%09red/hsa:6263%09red/hsa:478%09red/hsa:3346%09red/hsa:51806%09red/hsa:477%09red/hsa:1470%09red/hsa:155%09red/hsa:1472%09red/hsa:1473%09red
Arrhythmogenic right ventricular cardiomyopathy (ARVC)	KEGG PATHWAY	hsa05412	12	77	5.03016e-05	0.000947224	ACTN2|SLC8A2|DMD|SGCG|DES|ITGA7|CTNNA2|CACNG1|LEF1|CDH2|CACNG4|CACNG6	http://www.genome.jp/kegg-bin/show_pathway?hsa05412/hsa:3679%09red/hsa:786%09red/hsa:27092%09red/hsa:59285%09red/hsa:6445%09red/hsa:6543%09red/hsa:51176%09red/hsa:1496%09red/hsa:88%09red/hsa:1000%09red/hsa:1674%09red/hsa:1756%09red
MAPK signaling pathway	KEGG PATHWAY	hsa04010	26	295	5.04047e-05	0.000947224	MAPK10|CACNA1H|CACNA1B|NTRK2|FGF2|FGF1|SCT|ANGPT1|ANGPT4|FIGF|TGFBR2|IGF1|NTF4|FOS|MRAS|EFNA2|FGF5|FGF4|FGFR3|MAPK8IP2|PLA2G4D|KIT|CACNG1|CACNG4|CACNG6|FGF21	http://www.genome.jp/kegg-bin/show_pathway?hsa04010/hsa:3815%09red/hsa:4909%09red/hsa:27092%09red/hsa:23542%09red/hsa:786%09red/hsa:3479%09red/hsa:2250%09red/hsa:2277%09red/hsa:2317%09red/hsa:5602%09red/hsa:26291%09red/hsa:2353%09red/hsa:4915%09red/hsa:774%09red/hsa:284%09red/hsa:59285%09red/hsa:51378%09red/hsa:2249%09red/hsa:2246%09red/hsa:2247%09red/hsa:1943%09red/hsa:283748%09red/hsa:2261%09re…
Mineral absorption	KEGG PATHWAY	hsa04978	10	53	5.13263e-05	0.000960474	CABP1|MT1M|SLC6A19|MT1H|ATP1A3|ATP1A2|TF|SLC26A9|S100G|SLC8A2	http://www.genome.jp/kegg-bin/show_pathway?hsa04978/hsa:115019%09red/hsa:795%09red/hsa:4496%09red/hsa:7018%09red/hsa:6543%09red/hsa:4499%09red/hsa:340024%09red/hsa:478%09red/hsa:477%09red
Regulation of actin cytoskeleton	KEGG PATHWAY	hsa04810	21	214	6.45355e-05	0.00116822	F2|FGF4|IQGAP3|FN1|FGD3|DIAPH3|CFD|MYLK|MYLK2|MRAS|FGFR3|PAK3|ITGA7|CFL2|PPP1R12B|PAK7|FGF5|FGF21|FGF2|FGF1|GSN	http://www.genome.jp/kegg-bin/show_pathway?hsa04810/hsa:2934%09red/hsa:200576%09red/hsa:4660%09red/hsa:2249%09red/hsa:5063%09red/hsa:3679%09red/hsa:22808%09red/hsa:2250%09red/hsa:57144%09red/hsa:1073%09red/hsa:2246%09red/hsa:2247%09red/hsa:2147%09red/hsa:2335%09red/hsa:81624%09red/hsa:89846%09red/hsa:85366%09red/hsa:2261%09red/hsa:26291%09red/hsa:4638%09red/hsa:128239%09red
Regulation of lipolysis in adipocytes	KEGG PATHWAY	hsa04923	10	55	6.75874e-05	0.0012185	NPR1|LIPE|AQP7|MGLL|FABP4|PDE3B|ADRB2|ADRB3|PLIN1|GNAI1	http://www.genome.jp/kegg-bin/show_pathway?hsa04923/hsa:3991%09red/hsa:2770%09red/hsa:5140%09red/hsa:5346%09red/hsa:11343%09red/hsa:155%09red/hsa:154%09red/hsa:364%09red/hsa:2167%09red/hsa:4881%09red
Oxytocin signaling pathway	KEGG PATHWAY	hsa04921	17	153	7.9188e-05	0.00141044	KCNJ3|NPR1|KCNJ6|KCNJ4|RYR3|FOS|MYLK2|MYLK|CALML5|DSC1|PPP1R12B|OXTR|CACNG1|PLA2G4D|CACNG4|CACNG6|GNAI1	http://www.genome.jp/kegg-bin/show_pathway?hsa04921/hsa:4638%09red/hsa:4660%09red/hsa:85366%09red/hsa:2353%09red/hsa:786%09red/hsa:5021%09red/hsa:51806%09red/hsa:2770%09red/hsa:59285%09red/hsa:27092%09red/hsa:1827%09red/hsa:6263%09red/hsa:283748%09red/hsa:4881%09red/hsa:3763%09red/hsa:3760%09red/hsa:3761%09red
[truncated: 234 more rows]

## Sheet: P<0.05 KEGG
#Term	Database	ID	Input number	Background number	P-Value	Corrected P-Value	Input	Hyperlink
[truncated: 150 more rows]

## Sheet:  KEGG pathway selected
Pathways	Count	pvalue	Gene
[truncated: 20 more rows]

## Sheet: P<0.05 GO
#Term	Database	ID	Input number	Background number	P-Value	Corrected P-Value	Input	Hyperlink
[truncated: 762 more rows]

[truncated: 1 more sheets: GO term selected]
