# Supplementary material for: Identification of key modules and genes associated with breast cancer prognosis using WGCNA and ceRNA network analysis
Source: Aging (Albany NY). 2020 Dec 9;13(2):2519–38. doi: 10.18632/aging.202285 (PMC7880379; doi:10.18632/aging.202285)
Supplement: Supplementary Table 4 [file aging-13-202285-s005.xlsx]

## Sheet: Sheet1
Supplementary Table 4. Clinical trait data.
submitter_id-samples	age_at_initial_pathologic_diagnosis	days_to_new_tumor_event_after_initial_treatment	pathologic_M	pathologic_N	pathologic_T	radiation_therapy	additional_pharmaceutical_therapy	days_to_death	vital_status	tumor_stage
TCGA-A2-A0CY-01A	63		M0	N1	T2	NO			Alive	stage iib
TCGA-B6-A40B-01A	76		M0	N0 (i-)	T1b	NO			Alive	stage i
TCGA-AO-A0J8-01A	61		M0	N0 (i+)	T2	YES			Alive	stage iia
TCGA-A8-A08J-01A	52		M1	N3	T4b	NO		1127	Dead	stage iv
TCGA-E2-A14N-01A	37		M0	N1	T2	YES			Alive	stage iib
TCGA-BH-A1F0-01A	80		M0	N1c	T1a			785	Dead	stage iia
TCGA-BH-A1F0-11B	80		M0	N1c	T1a			785	Dead	stage iia
TCGA-BH-A0BZ-01A	59		M0	N1a	T3	YES			Alive	stage iiia
TCGA-BH-A0BZ-11A	59		M0	N1a	T3	YES			Alive	stage iiia
TCGA-AC-A2FM-01A	87		M0	N1mi	T2	NO		792	Dead	stage iib
TCGA-AC-A2FM-11B	87		M0	N1mi	T2	NO		792	Dead	stage iib
TCGA-A8-A0AB-01A	54		M0	N0	T2	NO			Alive	stage iia
TCGA-A2-A0EN-01A	70		M0	N0 (i+)	T2	YES			Alive	stage iia
TCGA-B6-A0WS-01A	58		MX	NX	T1c	NO		2965	Dead	stage x
TCGA-BH-A18G-01A	81		M0	N0	T1c	YES			Alive	stage ia
TCGA-A7-A5ZW-01A	47		M0	N1a	T1c	YES			Alive	stage iia
TCGA-AN-A0XL-01A	61		M0	N0	T2	NO			Alive	stage iia
TCGA-B6-A1KF-01A	68		M0	N1	T2	YES			Alive	stage iib
TCGA-A2-A0SW-01A	82	653	M1	N2	T2	YES	NO	1365	Dead	stage iv
TCGA-AO-A0J5-01A	48		M1	N1a	T4	YES		792	Dead	stage iv
TCGA-A1-A0SE-01A	56		M0	N0 (i-)	T1c				Alive	stage i
TCGA-GM-A2DA-01A	46		M0	N1b	T2	YES		6593	Dead	stage iib
TCGA-BH-A0EA-01A	72		M0	N1a	T1c	NO		991	Dead	stage iia
TCGA-C8-A8HP-01A	59		M0	N2	T2	NO			Alive	stage iiia
TCGA-A8-A095-01A	45		M0	N0	T1c	YES			Alive	stage i
TCGA-AC-A23G-01A	76		MX	N1	T1c	NO			Alive	stage iia
TCGA-AC-A23G-11A	76		MX	N1	T1c	NO			Alive	stage iia
TCGA-BH-A0DE-01A	62		M0	N0	T2	YES			Alive	stage iia
TCGA-BH-A0DE-11A	62		M0	N0	T2	YES			Alive	stage iia
TCGA-GM-A2DM-01A	57		M0	N0 (i-)	T2	YES			Alive	stage iia
TCGA-B6-A0I8-01A	46	746	M0	NX	T1	NO	YES	749	Dead	stage x
TCGA-EW-A1PC-01B	66		MX	N0 (i-)	T3	NO			Alive	stage iib
TCGA-A8-A092-01A	48		M0	N2a	T2	YES			Alive	stage iiia
TCGA-AO-A0J7-01A	71		M0	N1	T2	YES			Alive	stage iib
TCGA-A7-A3RF-01A	79		M0	N0	T2	YES			Alive	stage iia
TCGA-A2-A0YM-01A	67		M0	N0 (i-)	T2	YES			Alive	stage iia
TCGA-C8-A1HE-01A	59		M0	N0	T2	NO			Alive	stage iia
TCGA-AR-A0TR-01A	68		M0	N1	T2	NO		160	Dead	stage iib
TCGA-S3-AA17-01A	64		cM0 (i+)	N1mi	T2	YES			Alive	stage iib
TCGA-BH-A0HA-01A	31		M0	N0 (i-)	T1c	NO			Alive	stage i
TCGA-BH-A0HA-11A	31		M0	N0 (i-)	T1c	NO			Alive	stage i
TCGA-BH-A0GZ-01A	62		M0	N1a	T1c	YES	NO		Alive	stage iia
TCGA-E2-A1IO-01A	37		M0	N0	T1c	YES			Alive	stage i
TCGA-E2-A1IO-11A	37		M0	N0	T1c	YES			Alive	stage i
TCGA-BH-A0HQ-01A	56		M0	N0 (i+)	T2	YES			Alive	stage iia
TCGA-D8-A27K-01A	47		M0	N1a	T2	NO			Alive	stage iib
TCGA-E2-A10F-01A	47		M0	N0 (i-)	T2	YES			Alive	stage iia
TCGA-S3-AA15-01A	51		cM0 (i+)	N1a	T2	YES			Alive	stage iib
TCGA-AC-A62X-01A	72		MX	N0	T2	NO			Alive	stage iia
TCGA-B6-A0RM-01A	57		MX	NX	TX	NO		2373	Dead	stage x
TCGA-A8-A06Z-01A	84		M0	N0	T3				Alive	stage iib
TCGA-AC-A6IW-01A	73		MX	N0 (i-)	T2	NO			Alive	stage iia
TCGA-E2-A574-01A	44		M0	N0	T2	YES			Alive	stage iia
TCGA-4H-AAAK-01A	50		M0	N2a	T2	NO			Alive	stage iiia
TCGA-E2-A14Z-01A	64	188	M0	N0	T1c	YES		563	Dead	stage i
TCGA-OL-A6VO-01A	43		MX	N0	T1c	YES			Alive	stage ia
TCGA-GM-A2DH-01A	58		M0	N0 (i+)	T1c	NO			Alive	stage i
TCGA-AN-A0FW-01A	67		M0	N2	T2	NO			Alive	stage iiia
TCGA-AC-A2FO-01A	65		MX	N1	T2	NO			Alive	stage iib
TCGA-AC-A2FO-11A	65		MX	N1	T2	NO			Alive	stage iib
TCGA-AR-A24S-01A	61		M0	N0	T1	YES			Alive	stage i
TCGA-E2-A1IK-01A	71		M0	N1mi	T1c	NO			Alive	stage iia
TCGA-BH-A1FU-01A	44		M0	N0	T1c			1688	Dead	stage ia
TCGA-BH-A1FU-11A	44		M0	N0	T1c			1688	Dead	stage ia
TCGA-B6-A0RL-01A	60		M0	N0 (i-)	T2	NO		2469	Dead	stage iia
TCGA-BH-A0HO-01A	48		M0	N1a	T1c	YES			Alive	stage iia
TCGA-BH-A0DT-01A	41		M0	N1a	T1c	YES			Alive	stage iia
TCGA-BH-A0DT-11A	41		M0	N1a	T1c	YES			Alive	stage iia
TCGA-E9-A1RA-01A	48		M0	N0	T1c	YES			Alive	stage ia
TCGA-D8-A1XT-01A	61		M0	N1a	T1c	NO			Alive	stage iia
TCGA-AR-A24X-01A	52		M0	N0	T2	NO			Alive	stage iia
TCGA-EW-A2FW-01A	52		MX	N0 (i-)	T2	YES			Alive	stage iia
TCGA-C8-A26Z-01A	59		M0	N0	T2	NO			Alive	stage iia
TCGA-A7-A13E-01A	62	556	MX	N1	T2	NO	YES	614	Dead	stage iib
TCGA-A7-A13E-11A	62	556	MX	N1	T2	NO	YES	614	Dead	stage iib
TCGA-BH-A0B7-01A	42		M0	N1a	T2	YES			Alive	stage iib
TCGA-BH-A0B7-11A	42		M0	N1a	T2	YES			Alive	stage iib
TCGA-D8-A27R-01A	41		M0	N3a	T2	YES			Alive	stage iiic
TCGA-A8-A0A2-01A	66		M0	N0	T2				Alive	stage iia
TCGA-A1-A0SB-01A	70		M0	N0	T1c				Alive	stage i
TCGA-AC-A2QH-01A	58		MX	N0	T3	YES			Alive	stage iib
TCGA-E9-A3QA-01A	33		M0	N0 (i-)	T2	NO			Alive	stage iia
TCGA-BH-A1ET-01A	55		M0	N0	T1			2520	Dead	stage i
TCGA-BH-A1ET-11B	55		M0	N0	T1			2520	Dead	stage i
TCGA-C8-A133-01A	65		M0	N1	T3				Alive	stage iiia
TCGA-OL-A5D6-01A	71		MX	N0	T2	NO		1104	Dead	stage iia
TCGA-E2-A56Z-01A	69		M0	N1a	T2	YES			Alive	stage iib
TCGA-AN-A0XT-01A	54		M0	N2	T2	NO			Alive	stage iiia
TCGA-E9-A1RG-01A	62		M0	N2	T1c	YES			Alive	stage iiia
TCGA-B6-A0RP-01A	73	2787	M0	N1b	T2	NO	YES	3126	Dead	not reported
TCGA-A2-A4S2-01A	62		M0	N2	T3	YES			Alive	stage iiia
TCGA-AO-A0JG-01A	49		M0	N2a	T2	YES			Alive	stage iiia
TCGA-BH-A1FG-01A	88		M0	NX	T1c			577	Dead	stage i
TCGA-BH-A1FG-11B	88		M0	NX	T1c			577	Dead	stage i
TCGA-E9-A2JT-01A	63		M0	N0 (i-)	T2	YES			Alive	stage iia
TCGA-D8-A1XO-01A	56		M0	N1a	T2	YES			Alive	stage iib
TCGA-D8-A1XJ-01A	76		MX	N1a	T3	NO			Alive	stage iiia
TCGA-AR-A24W-01A	55		M0	N1	T2	NO			Alive	stage iib
TCGA-AN-A0XU-01A	54		M0	N0	T2	NO			Alive	stage iia
TCGA-B6-A0RH-01A	51		M0	N0 (i-)	T2	NO		6456	Dead	stage iia
TCGA-AR-A2LR-01A	49		M0	N0	T1	NO			Alive	stage i
TCGA-BH-A0B1-01A	66		M0	N1a	T2	YES			Alive	stage iib
TCGA-D8-A146-01A	57		MX	N0	T2	NO			Alive	stage iia
TCGA-AN-A03Y-01A	66		M0	N0	T2	NO			Alive	stage iia
TCGA-BH-A0B0-01A	56		M0	N0	T1c	YES			Alive	stage i
TCGA-BH-A8FZ-01A	58		M0	N0	T1b	YES			Alive	stage ia
TCGA-LD-A74U-01A	79		M0	N3a	T3	NO			Alive	stage iiic
TCGA-GM-A3XL-01A	49		M0	N0 (i-)	T2	YES			Alive	stage iia
TCGA-BH-A18M-01A	39		M0	N1	T3			2207	Dead	stage iiia
TCGA-BH-A18M-11A	39		M0	N1	T3			2207	Dead	stage iiia
TCGA-A2-A0CS-01A	73		M1	N3a	T4b	YES		2348	Dead	stage iv
TCGA-D8-A1JG-01B	62		M0	N0	T2	YES			Alive	stage iia
TCGA-EW-A6SA-01A	59		MX	N0 (i+)	T2				Alive	stage ii
TCGA-D8-A1XB-01A	62		M0	N1a	T2	YES			Alive	stage iib
TCGA-V7-A7HQ-01A	75		M0	N2a	T1c	YES			Alive	stage iiia
TCGA-E9-A5UP-01A	63		M0	N0	T2	YES			Alive	stage iia
TCGA-A8-A08I-01A	53		M0	N0	T2	YES			Alive	stage iia
TCGA-AR-A250-01A	58		M0	N0	T2	NO			Alive	stage iia
TCGA-AC-A3EH-01A	79		M0	N3	T3	NO		197	Dead	stage iiic
TCGA-AC-A3EH-11B	79		M0	N3	T3	NO		197	Dead	stage iiic
TCGA-E2-A15L-01A	65		M0	N0	T2	NO			Alive	stage iia
TCGA-E2-A15L-11A	65		M0	N0	T2	NO			Alive	stage iia
TCGA-BH-A208-01A	48		M0	N1b	T2			1759	Dead	stage iib
TCGA-BH-A208-11A	48		M0	N1b	T2			1759	Dead	stage iib
TCGA-E2-A15I-01A	44		M0	N0	T2	NO			Alive	stage iia
TCGA-E2-A15I-11A	44		M0	N0	T2	NO			Alive	stage iia
TCGA-A7-A6VW-01A	48		M0	N0	T2	YES			Alive	stage iia
TCGA-A2-A3XT-01A	45		M0	N1a	T2	YES			Alive	stage iib
TCGA-E2-A2P5-01A	78		M0	N3	T2	YES		821	Dead	stage iiic
TCGA-E9-A1N6-01A	52		M0	N1	T2	YES		678	Dead	stage iib
TCGA-E9-A1N6-11A	52		M0	N1	T2	YES		678	Dead	stage iib
TCGA-AR-A24Z-01A	57		M0	N0	T2	NO			Alive	stage iia
TCGA-AO-A03T-01A	42		M0	N1a	T2	NO			Alive	stage iib
TCGA-D8-A1JK-01A	90		M0	N0	T2	NO			Alive	stage iia
TCGA-BH-A0H0-01A	69		M0	N0 (i-)	T1c	YES			Alive	stage ia
TCGA-LL-A8F5-01A	61		MX	N0 (i-)	T2	YES			Alive	stage iia
TCGA-C8-A3M8-01A	68		M0	N0	T1c	NO			Alive	stage ia
TCGA-A2-A04Y-01A	53		M0	N1mi	T2	YES			Alive	stage iib
TCGA-AC-A23H-01A	90		M0	NX	T2	NO		0	Dead	stage iia
TCGA-AC-A23H-11A	90		M0	NX	T2	NO		0	Dead	stage iia
TCGA-E2-A1BC-01A	63		M0	N0	T1c	NO			Alive	stage ia
TCGA-E2-A1BC-11A	63		M0	N0	T1c	NO			Alive	stage ia
TCGA-A2-A3XW-01A	42		M0	N1a	T2	YES			Alive	stage iib
TCGA-AO-A03V-01A	41		M0	N0 (i-)	T1c	NO			Alive	stage i
TCGA-AC-A3YJ-01A	66		MX	N0 (i-)	T2	NO			Alive	stage iia
TCGA-OL-A5DA-01A	61		MX	N0	T2	NO			Alive	stage iia
TCGA-E2-A1LA-01A	59		M0	N1a	T1c	NO			Alive	stage iia
TCGA-BH-A0W3-01A	58		M0	N1a	T1c	YES			Alive	stage iia
TCGA-B6-A0IE-01A	38	834	M0	N1b	T3	YES	YES	1993	Dead	stage iiia
TCGA-D8-A1XK-01A	55		MX	N1a	T2	YES			Alive	stage iib
TCGA-A8-A0A4-01A	73		M0	N0	T2	NO			Alive	stage iia
TCGA-AR-A1AM-01A	52		M0	N1	T3	NO			Alive	stage iiia
TCGA-AO-A03N-01B	59	1645	M0	N1a	T2	NO	YES		Alive	stage iib
TCGA-AR-A24O-01A	43		M0	N2	T3	YES			Alive	stage iiia
TCGA-D8-A1JN-01A	80		MX	N3a	T3	NO			Alive	stage iiic
TCGA-A8-A09B-01A	58		M0	N1a	T4b	YES			Alive	stage iiib
TCGA-OK-A5Q2-01A	59		MX	N1a	T2				Alive	stage ii
TCGA-BH-A0BO-01A	54		M0	N0	T1b	YES			Alive	stage i
TCGA-BH-A0BO-11A	54		M0	N0	T1b	YES			Alive	stage i
TCGA-A7-A3J1-01A	63		MX	N0	T1c	YES			Alive	stage ia
TCGA-AN-A0AT-01A	62		M0	N0	T2	NO			Alive	stage iia
TCGA-BH-A18I-01A	53		cM0 (i+)	N1a	T1c	NO			Alive	stage iia
TCGA-E2-A2P6-01A	77		M0	N1	T2	NO			Alive	stage iib
TCGA-A7-A56D-01A	84		M0	N0	T2	NO			Alive	stage iia
TCGA-A7-A56D-11A	84		M0	N0	T2	NO			Alive	stage iia
TCGA-B6-A0X5-01A	61	1343	M0	N1b	T2	NO	NO	2097	Dead	stage iib
TCGA-AR-A0TS-01A	46		M0	N1	T2	YES			Alive	stage iib
TCGA-BH-A0B3-01A	53		M0	N1a	T2	YES			Alive	stage iib
TCGA-BH-A0B3-11B	53		M0	N1a	T2	YES			Alive	stage iib
TCGA-A8-A09N-01A	57		M0	N3a	T2				Alive	stage iiic
TCGA-AO-A126-01A	39	267	M0	N0 (i-)	T2	YES	NO		Alive	stage iia
TCGA-E2-A1IL-01A	78		M0	N1a	T1c	YES			Alive	stage iia
TCGA-C8-A1HL-01A	38		M0	N1	T3	NO			Alive	stage iiia
TCGA-E2-A1L8-01A	52		M0	N1a	T2	YES			Alive	stage iib
TCGA-EW-A6SB-01A	62		M0	N0	T2				Alive	stage ii
TCGA-BH-A8FY-01A	87		M0	N0 (i+)	T1c			295	Dead	stage ia
TCGA-AC-A62Y-01A	79		MX	N1	T2	YES			Alive	stage iib
TCGA-AR-A1AK-01A	70		M0	N0	T1	NO			Alive	stage i
TCGA-C8-A12P-01A	55		M0	N1	T2	NO			Alive	stage iib
TCGA-AN-A0XW-01A	36		M0	N2	T2	NO			Alive	stage iiia
TCGA-E2-A14Q-01A	50		M0	N1mi	T2	NO			Alive	stage iib
TCGA-A8-A085-01A	44		M0	N1a	T2	NO			Alive	stage iib
TCGA-BH-A0BJ-01A	41		M0	N1a	T2	YES			Alive	stage iib
TCGA-BH-A0BJ-11A	41		M0	N1a	T2	YES			Alive	stage iib
TCGA-E2-A1L6-01A	44		M0	N1mi	T1c	NO			Alive	stage iia
TCGA-OL-A5RV-01A	43		MX	N3	T2	YES			Alive	stage iiic
TCGA-AR-A0TU-01A	35		M0	N0	T2	NO			Alive	stage iia
TCGA-B6-A1KN-01A	57		M0	N1	T4b	YES			Alive	stage iiib
TCGA-AR-A5QM-01A	62		M0	N0	T2	YES			Alive	stage iia
TCGA-E2-A1LG-01A	50		M0	N0	T2	NO			Alive	stage iia
TCGA-E2-A1LG-11A	50		M0	N0	T2	NO			Alive	stage iia
TCGA-AR-A256-01A	45	1640	M0	N0	T2	NO		2854	Dead	stage iia
TCGA-A8-A06Y-01A	66		M0	N0	T2	YES			Alive	stage iia
TCGA-D8-A1JL-01A	72		M0	N0	T2	NO			Alive	stage iia
TCGA-A7-A13D-01A	46		M0	N0 (i-)	T2	YES			Alive	stage iia
TCGA-E2-A15F-01A	64		M0	N0	T1c	YES			Alive	stage i
TCGA-E9-A1N8-01A	48		M0	N0	T2	NO			Alive	stage iia
TCGA-E9-A1N8-11A	48		M0	N0	T2	NO			Alive	stage iia
TCGA-GM-A3NW-01A	63		M0	N0 (i-)	T2	NO			Alive	stage iia
TCGA-E9-A1RI-01A	43		M0	N2	T1c	YES			Alive	stage iiia
TCGA-E9-A1RI-11A	43		M0	N2	T1c	YES			Alive	stage iiia
TCGA-AR-A5QP-01A	54		M0	N1	T2	YES			Alive	stage iib
TCGA-BH-A1FL-01A	69		M0	N1b	T2			1673	Dead	stage iib
TCGA-BH-A1FL-11A	69		M0	N1b	T2			1673	Dead	stage iib
TCGA-C8-A1HK-01A	53		M0	N1	T2	NO			Alive	stage iib
TCGA-A8-A07S-01A	73		M0	N0	T2	YES			Alive	stage iia
TCGA-AR-A1AT-01A	62		M0	N0	T2	YES		1272	Dead	stage iia
TCGA-OL-A66J-01A	80		MX	N0	T1c	YES			Alive	stage i
TCGA-D8-A27V-01A	62		M0	N0	T2	NO			Alive	stage iia
TCGA-A2-A0EU-01A	79		M0	N0 (i-)	T1c	YES			Alive	stage ia
TCGA-BH-A0W7-01A	49		M0	N0 (i-)	T1c	YES			Alive	stage i
TCGA-A8-A096-01A	73		M0	N0	T2				Alive	stage iia
TCGA-E2-A1BD-01A	53		M0	N0	T2	YES			Alive	stage iia
TCGA-D8-A13Z-01A	51		M0	N2a	T2	YES			Alive	not reported
TCGA-A2-A04R-01A	36		M0	N0 (i-)	T1	YES			Alive	stage ia
TCGA-B6-A0RS-01A	38	2041	M0	N0 (i-)	T2	NO	YES	3063	Dead	stage iia
TCGA-AN-A0XO-01A	59		M0	N2	T2	NO			Alive	stage iiia
TCGA-A2-A1G0-01A	49		M0	N1a	T2	YES			Alive	stage iib
TCGA-BH-A1EO-01A	68		M0	N1	T1c			2798	Dead	stage iia
TCGA-BH-A1EO-11A	68		M0	N1	T1c			2798	Dead	stage iia
TCGA-BH-A0HU-01A	52		M0	N0 (i-)	T1c	YES			Alive	stage ia
TCGA-AN-A0AS-01A	70		M0	N2	T2	NO			Alive	stage iiia
TCGA-AO-A03M-01B	29		M0	N0 (i-)	T1c	NO			Alive	stage i
TCGA-OL-A5D8-01A	40		MX	N0	T3	YES			Alive	stage iib
TCGA-AR-A2LJ-01A	40		MX	N1	T3	YES			Alive	stage iiia
TCGA-EW-A1IW-01A	80		MX	N1a	T2	NO			Alive	stage iib
TCGA-AC-A3QP-01A	79		MX	N1mi	T2	YES			Alive	stage iib
TCGA-EW-A1P0-01A	55	1094	MX	N1b	T2	YES	YES		Alive	stage iib
TCGA-A2-A0CP-01A	60		M0	N0 (i-)	T1c	YES			Alive	stage ia
TCGA-AR-A2LH-01A	55		M0	N3	T3	YES		616	Dead	stage iii
TCGA-D8-A1XQ-01A	69		M0	N0	T2	NO			Alive	stage iia
TCGA-E2-A1LE-01A	71	361	M0	N3a	T2	YES	YES	879	Dead	stage iiic
TCGA-E2-A1LE-11A	71	361	M0	N3a	T2	YES	YES	879	Dead	stage iiic
TCGA-E9-A1NE-01A	28		M0	N1	T2	YES			Alive	stage iib
TCGA-E9-A1NE-11A	28		M0	N1	T2	YES			Alive	stage iib
TCGA-BH-A0DO-01B	78		M0	N0	T1c	NO			Alive	stage i
TCGA-BH-A0DO-11A	78		M0	N0	T1c	NO			Alive	stage i
TCGA-BH-A1F8-01A	90		M0	N2	T4b			1	Dead	stage iiib
TCGA-BH-A1F8-11B	90		M0	N2	T4b			1	Dead	stage iiib
TCGA-BH-A0C0-01A	62		M0	N1a	T1c	YES			Alive	stage iia
TCGA-BH-A0C0-11A	62		M0	N1a	T1c	YES			Alive	stage iia
TCGA-A2-A3XU-01A	35		M0	N1mi	T2	YES		912	Dead	stage iib
TCGA-AR-A1AS-01A	54		M0	N1	T2	YES			Alive	stage iib
TCGA-A2-A0CX-01A	52		M0	N0 (i-)	T2	YES			Alive	stage iia
TCGA-A8-A091-01A	61		M0	N0	T2	YES			Alive	stage iia
TCGA-B6-A0WV-01A	67		M0	N1b	T2	NO		2417	Dead	stage iib
TCGA-E2-A15M-01A	66		M0	N0	T2	YES		336	Dead	stage iia
TCGA-E2-A15M-11A	66		M0	N0	T2	YES		336	Dead	stage iia
TCGA-AC-A5EI-01A	88		MX	N1mi	T1c	NO			Alive	stage ib
TCGA-A7-A5ZV-01A	62		M0	N0	T2	YES			Alive	stage iia
TCGA-BH-A0EB-01A	69		M0	N0 (i-)	T1c	YES	NO		Alive	stage ia
TCGA-C8-A1HJ-01A	53		M0	N0	T2				Alive	stage iia
TCGA-A8-A06X-01A	77		M0	N0	T3	YES		943	Dead	stage iib
TCGA-D8-A27P-01A	64		M0	N0	T1c	NO			Alive	stage ia
TCGA-AR-A24Q-01A	49		M0	N0	T3	YES			Alive	stage iib
TCGA-E2-A1LI-01A	57		M0	N1	T2	YES			Alive	stage iib
TCGA-E2-A1LI-11A	57		M0	N1	T2	YES			Alive	stage iib
TCGA-D8-A1Y0-01A	65		MX	N2a	T1c	YES			Alive	stage iiia
TCGA-A1-A0SH-01A	39		M0	N0 (i-)	T2				Alive	stage iia
TCGA-D8-A1XL-01A	34		MX	N1a	T2	YES			Alive	stage iib
TCGA-BH-A1F2-01A	53		M0	N1b	T4b			959	Dead	stage iiib
TCGA-BH-A1F2-11A	53		M0	N1b	T4b			959	Dead	stage iiib
TCGA-B6-A1KC-01A	67		M0	N1	T2	YES			Alive	stage iib
TCGA-C8-A26W-01A	58		M0	N1	T2	NO			Alive	stage iib
TCGA-A2-A3XY-01A	49		M0	N1a	T2	YES		1093	Dead	stage iib
TCGA-E2-A15K-01A	58		M0	N1a	T2	YES			Alive	stage iib
TCGA-E2-A15K-06A	58		M0	N1a	T2	YES			Alive	stage iib
TCGA-E2-A15K-11A	58		M0	N1a	T2	YES			Alive	stage iib
TCGA-A1-A0SI-01A	52		M0	N1a	T2				Alive	stage iib
TCGA-E9-A1R2-01A	51		MX	N3	T2				Alive	stage iiic
TCGA-C8-A1HG-01A	50		M0	N0	T2	NO			Alive	stage iia
TCGA-AO-A0JF-01A	68		M0	N1a	T1c	YES			Alive	stage iia
TCGA-A8-A07F-01A	65		M0	N1a	T2	YES			Alive	stage iib
TCGA-AR-A0U0-01A	73		M0	N1	T2	YES			Alive	stage iib
TCGA-A2-A0ES-01A	52		M0	N0 (i-)	T2	NO			Alive	stage iia
TCGA-EW-A1PF-01A	50		M0	N0	T1c	NO			Alive	stage ia
TCGA-AR-A1AV-01A	68		M0	N1	T2	YES			Alive	stage iib
TCGA-LL-A5YN-01A	46		M0	N0 (i-)	T2	YES			Alive	stage iia
TCGA-OL-A5RY-01A	52		MX	N1	T1c	YES			Alive	stage iia
TCGA-A8-A0A6-01A	64		M0	N3a	T2	YES			Alive	stage iiic
TCGA-BH-A2L8-01A	45		M0	N0 (i-)	T2	NO			Alive	stage iia
TCGA-A8-A076-01A	66		M0	N0	T2	NO			Alive	stage iia
TCGA-BH-A0BQ-01A	39		M0	N0	T1c	NO			Alive	stage i
TCGA-BH-A0BQ-11A	39		M0	N0	T1c	NO			Alive	stage i
TCGA-E9-A24A-01A	69		M0	N1	T1c	YES			Alive	stage iia
TCGA-Z7-A8R6-01A	46		M0	N0	T1c	NO			Alive	stage i
TCGA-E9-A1NI-01A	51		M0	N0	T2				Alive	stage iia
TCGA-BH-A5IZ-01A	51		cM0 (i+)	N1a	T2	YES			Alive	stage iib
TCGA-BH-A5IZ-11A	51		cM0 (i+)	N1a	T2	YES			Alive	stage iib
TCGA-BH-A0HB-01A	55		M0	N0 (i-)	T1c	YES			Alive	stage ia
TCGA-AO-A0JE-01A	53		M0	N2a	T2	YES			Alive	stage iiia
TCGA-AN-A0AL-01A	41		M0	N0	T4	NO			Alive	stage iiib
TCGA-BH-A0DZ-01A	43		M0	N1a	T2	NO			Alive	stage iib
TCGA-BH-A0DZ-11A	43		M0	N1a	T2	NO			Alive	stage iib
TCGA-B6-A0IQ-01A	40		M0	N1b	T3	YES			Alive	stage iiia
TCGA-AC-A2QJ-01A	48		M0	N0	T4b	YES		446	Dead	stage iiib
TCGA-AC-A2QJ-11A	48		M0	N0	T4b	YES		446	Dead	stage iiib
TCGA-A8-A09W-01A	70		M0	N3	T2				Alive	stage iiib
TCGA-AR-A2LL-01A	70		M0	N0	T3	NO			Alive	stage iib
TCGA-BH-A18T-01A	70		M0	N0	T2			224	Dead	stage iia
TCGA-BH-A18T-11A	70		M0	N0	T2			224	Dead	stage iia
TCGA-LD-A7W6-01A	54		M0	N1a	T2	NO			Alive	stage iib
TCGA-D8-A73X-01A	53		M0	N0	T2	YES			Alive	stage iia
TCGA-A8-A08B-01A	52		M0	N0	T2	YES			Alive	stage iia
TCGA-AR-A24T-01A	46		M0	N3	T3	YES			Alive	stage iiic
TCGA-AO-A12B-01A	63		M0	N0 (i-)	T2	NO			Alive	stage iia
TCGA-BH-A18P-01A	60		M0	N0	T1			921	Dead	stage i
TCGA-BH-A18P-11A	60		M0	N0	T1			921	Dead	stage i
TCGA-C8-A12V-01A	55		M0	N0	T2	NO			Alive	stage iia
TCGA-Z7-A8R5-01A	61		MX	N1a	T3	NO			Alive	stage iiia
TCGA-E9-A1NH-01A	71		M0	N1	T2	NO			Alive	stage iib
TCGA-E9-A1NH-11A	71		M0	N1	T2	NO			Alive	stage iib
TCGA-A2-A1FW-01A	62		M0	N2a	T3	YES			Alive	stage iiia
TCGA-B6-A0RN-01A	60		M0	N0 (i-)	T1c	YES			Alive	stage ia
TCGA-A2-A1G4-01A	71		M0	N1a	T3	NO			Alive	stage iiia
TCGA-OL-A5RX-01A	51		MX	N0	T1c	NO			Alive	stage ia
TCGA-AO-A0J9-01A	61	1066	M0	N3	T2	YES	YES		Alive	stage iiic
TCGA-BH-A18H-01A	63		M0	N0	T1b	YES			Alive	stage ia
TCGA-A2-A0CW-01A	67		M0	N1a	T2	NO			Alive	stage iib
TCGA-A2-A0D2-01A	45		M0	N0 (i+)	T2	YES			Alive	stage iia
TCGA-E9-A1NG-01A	62		M0	N0	T2	NO		786	Dead	stage iia
TCGA-E9-A1NG-11A	62		M0	N0	T2	NO		786	Dead	stage iia
TCGA-AR-A24L-01A	26		M0	N1	T2	YES		2866	Dead	stage iib
TCGA-D8-A1XR-01A	56		M0	N1a	T2	NO			Alive	stage iib
TCGA-A2-A0EY-01A	62		M0	N1a	T2	YES			Alive	stage iib
TCGA-E9-A1R5-01A	63		M0	N0	T1c				Alive	stage ia
TCGA-AC-A5EH-01A	76		MX	N1mi	T2	YES			Alive	stage iib
TCGA-BH-A0EI-01A	51		M0	N1a	T1c	YES			Alive	stage iia
TCGA-EW-A2FS-01A	41		MX	N1mi	T2	YES			Alive	stage iib
TCGA-A2-A04U-01A	47		M0	N0 (i+)	T2	NO			Alive	stage iia
TCGA-JL-A3YW-01A	49		M0	N1	T2				Alive	stage iib
TCGA-E9-A1R0-01A	58		M0	N1	T1c	NO			Alive	stage iia
TCGA-C8-A274-01A	63		M0	N0	T2	NO			Alive	stage iia
TCGA-A7-A4SD-01A	52		M0	N0	T2	NO			Alive	stage iia
TCGA-A7-A4SD-11A	52		M0	N0	T2	NO			Alive	stage iia
TCGA-A7-A13G-01A	79		MX	N0	T2	NO			Alive	stage iia
TCGA-A7-A13G-11A	79		MX	N0	T2	NO			Alive	stage iia
TCGA-LL-A5YM-01A	88		M0	NX	T4b	NO			Alive	stage iiib
TCGA-OL-A5RZ-01A	57		MX	N0	T1b	NO			Alive	stage ia
TCGA-A2-A3KD-01A	47		M0	N1mi	T3	YES			Alive	stage iiia
TCGA-D8-A1JJ-01A	54		M0	N0	T2	YES			Alive	stage iia
TCGA-C8-A26X-01A	58		M0	N1	T1	NO			Alive	stage iia
TCGA-BH-A1F6-01A	51		MX	N2a	T4d			2965	Dead	not reported
TCGA-BH-A1F6-11B	51		MX	N2a	T4d			2965	Dead	not reported
TCGA-LL-A5YL-01A	64		MX	N1a	T2	YES			Alive	stage iib
TCGA-A8-A07P-01A	68		M0	N1	T2	YES			Alive	stage iib
TCGA-AR-A0TW-01A	50		M0	N1	T3	NO			Alive	stage iiia
TCGA-EW-A2FV-01A	39		MX	N3a	T3	YES			Alive	stage iiic
TCGA-A8-A08G-01A	41		M0	N0	T2	YES			Alive	stage iia
TCGA-A2-A0CL-01A	37		M0	N2a	T3	YES			Alive	stage iiia
TCGA-WT-AB44-01A	77		MX	N0 (i-)	T1c	YES			Alive	stage ia
TCGA-AC-A3W7-01A	66		MX	N1a	T2	NO			Alive	stage iib
TCGA-BH-A0EE-01A	68		M0	N0 (i-)	T3	NO	NO		Alive	stage iib
TCGA-E2-A155-01A	58		M0	N1a	T2	NO			Alive	stage iib
TCGA-E2-A15S-01A	34		M0	N1	T2	YES			Alive	stage iib
TCGA-BH-A1EN-01A	78		M0	NX	T2			2127	Dead	stage iia
TCGA-BH-A1EN-11A	78		M0	NX	T2			2127	Dead	stage iia
TCGA-BH-A1FE-01A	31		M0	N1	T2			2273	Dead	stage iib
TCGA-BH-A1FE-06A	31		M0	N1	T2			2273	Dead	stage iib
TCGA-BH-A1FE-11B	31		M0	N1	T2			2273	Dead	stage iib
TCGA-A2-A4RY-01A	46		M0	N3a	T3	YES			Alive	stage iiic
TCGA-C8-A1HM-01A	74		M0	N0	T2	NO			Alive	stage iia
TCGA-AC-A7VB-01A	51		MX	N1a	T1c	YES			Alive	stage iia
TCGA-E2-A15C-01A	61		M0	N0	T1c	YES			Alive	stage i
TCGA-E9-A22D-01A	38		M0	N0	T2	NO			Alive	stage iia
TCGA-AR-A0U4-01A	54		M0	N0	T2	NO			Alive	stage iia
TCGA-A8-A079-01A	69		M0	N3	T4b	YES			Alive	stage iiib
TCGA-A8-A07W-01A	76		M1	NX	T2	NO			Alive	stage iv
TCGA-D8-A1XS-01A	48		M0	N3a	T2	YES			Alive	stage iiic
TCGA-E2-A1IN-01A	60		M0	N0	T1c	YES			Alive	stage i
TCGA-B6-A0RO-01A	71		M0	N1a	T4	NO			Alive	stage iiib
TCGA-AO-A0JJ-01A	54		M0	N1a	T2	YES			Alive	stage iib
TCGA-AR-A5QQ-01A	68		M0	N1	T3	YES		322	Dead	stage iiia
TCGA-A2-A04W-01A	50		M0	N1mi	T2	NO			Alive	stage iib
TCGA-A8-A086-01A	59		M0	N1a	T1c	YES			Alive	stage iia
TCGA-BH-A28O-01A	50		M0	N3	T3a	YES			Alive	stage iiic
TCGA-AC-A3HN-01A	87		MX	N1a	T2	NO			Alive	stage iib
TCGA-OL-A6VQ-01A	49		MX	N0	T2	NO			Alive	stage iia
TCGA-E2-A572-01A	72		M0	N2	T2	YES			Alive	stage iiia
TCGA-B6-A0WW-01A	58	447	MX	N1b	T2	YES	YES	558	Dead	stage x
TCGA-E9-A244-01A	54		M0	N0 (i-)	T2	NO			Alive	stage iia
TCGA-AN-A0FF-01A	32		M0	N0	T1b	NO			Alive	stage ia
TCGA-D8-A1XM-01A	57		M0	N0	T1c	YES			Alive	stage ia
TCGA-GM-A2DO-01A	54		M0	N0 (i-)	T1c	YES			Alive	stage i
TCGA-B6-A0I1-01A	73		M0	N0	T2	NO		2361	Dead	stage iia
TCGA-BH-A18F-01A	50		M0	N0	T2	YES			Alive	stage iia
TCGA-BH-A18F-11A	50		M0	N0	T2	YES			Alive	stage iia
TCGA-AO-A12H-01A	69		M0	N0 (i-)	T2	NO			Alive	stage iia
TCGA-AC-A3BB-01A	46		MX	N2a	T3	YES			Alive	stage iiia
TCGA-D8-A4Z1-01A	68		M0	N0	T1c	NO			Alive	stage ia
TCGA-OL-A66O-01A	39		MX	N1a	T2	YES			Alive	stage iib
TCGA-A8-A09C-01A	69		MX	N0	T2				Alive	stage x
TCGA-BH-A1FR-01A	73		M0	N1a	T4b			1642	Dead	stage iiib
TCGA-BH-A1FR-11B	73		M0	N1a	T4b			1642	Dead	stage iiib
TCGA-AO-A03R-01A	57		M0	N1a	T2	YES			Alive	stage iib
TCGA-EW-A1OW-01A	58		MX	N0	T2	YES			Alive	stage iia
TCGA-AO-A0J6-01A	61		M0	N0 (i-)	T2	YES			Alive	stage iia
TCGA-A7-A0CG-01A	78		M0	N0 (i-)	T2	YES			Alive	stage iia
TCGA-A2-A04Q-01A	48		M0	N0 (i-)	T1	NO			Alive	stage ia
TCGA-BH-A18V-01A	48		M0	N1b	T2			1556	Dead	stage iib
TCGA-BH-A18V-06A	48		M0	N1b	T2			1556	Dead	stage iib
TCGA-BH-A18V-11A	48		M0	N1b	T2			1556	Dead	stage iib
TCGA-AC-A23E-01A	50		MX	N1	T2	YES			Alive	stage iib
TCGA-OL-A6VR-01A	48		MX	N0	T1b	NO			Alive	stage ia
TCGA-D8-A1Y2-01A	71		MX	N0	T2	NO			Alive	stage iia
TCGA-AO-A12F-01A	36		M0	N0 (i-)	T2	YES			Alive	stage iia
TCGA-E2-A570-01A	47		M0	N1mi	T1c	NO			Alive	stage ib
TCGA-AC-A2B8-01A	84		M0	N0 (i-)	T3	YES			Alive	stage iib
TCGA-AR-A24N-01A	54		M0	N0	T1	NO			Alive	stage i
TCGA-A2-A4S0-01A	77		M0	N0	T2				Alive	stage iia
TCGA-BH-A0C3-01A	47		M0	N0	T1c	YES			Alive	stage i
TCGA-BH-A0C3-11A	47		M0	N0	T1c	YES			Alive	stage i
TCGA-A7-A26G-01A	50		M0	N0 (i+)	T2	NO			Alive	stage iia
TCGA-E2-A1IE-01A	61		M0	N1	T2	YES			Alive	stage iib
TCGA-GM-A2DN-01A	58		M0	N0 (i-)	T2	NO			Alive	stage iia
TCGA-A2-A04P-01A	36		M0	N3c	T2	YES		548	Dead	stage iiic
TCGA-GM-A2D9-01A	69		M0	N0 (i-)	T1c	YES		1812	Dead	stage i
TCGA-GM-A2D9-11A	69		M0	N0 (i-)	T1c	YES		1812	Dead	stage i
TCGA-AC-A2FG-01A	79		MX	N1a	T2	NO			Alive	stage iib
TCGA-AC-A2FG-11A	79		MX	N1a	T2	NO			Alive	stage iib
TCGA-BH-A6R9-01A	61		M0	N0	T2	NO			Alive	stage iia
TCGA-BH-A18K-01A	46		M0	N0	T1			2763	Dead	stage i
TCGA-BH-A18K-11A	46		M0	N0	T1			2763	Dead	stage i
TCGA-B6-A401-01A	47		M0	N1a	T1c	NO			Alive	stage iia
TCGA-E2-A1LH-01A	59		M0	N0	T1c	YES			Alive	stage i
TCGA-E2-A1LH-11A	59		M0	N0	T1c	YES			Alive	stage i
TCGA-BH-A0BP-01A	76		M0	N0	T1c	YES		2296	Dead	stage i
TCGA-AO-A12D-01A	43		M0	N1a	T1c	YES			Alive	stage iia
TCGA-C8-A27B-01A	48		M0	N0	T3	NO			Alive	stage iib
TCGA-BH-A0AV-01A	52		M0	N0	T1c	YES			Alive	stage i
TCGA-EW-A1IY-01A	38		MX	N0	T1c	NO			Alive	stage i
TCGA-AR-A5QN-01A	68		M0	N3	T2	YES			Alive	stage iiic
TCGA-AN-A0FS-01A	55		M0	N0	T1c	NO			Alive	stage ia
TCGA-AN-A0FY-01A	55		M0	N0	T1c	NO			Alive	stage ia
TCGA-E9-A1N4-01A	41		M0	N2	T2	YES			Alive	stage iiia
TCGA-E9-A1N4-11A	41		M0	N2	T2	YES			Alive	stage iiia
TCGA-E2-A14Y-01A	35		M0	N0	T2	NO			Alive	stage iia
TCGA-E2-A14Y-11A	35		M0	N0	T2	NO			Alive	stage iia
TCGA-AO-A128-01A	61		M0	N0 (i-)	T2	YES			Alive	stage iia
TCGA-A2-A25A-01A	44		M0	N0 (i-)	T2	YES			Alive	stage iia
TCGA-A2-A0YJ-01A	39	559	M0	N2a	T3	YES	NO		Alive	stage iiia
TCGA-A2-A0SY-01A	62		M0	N1	T3	YES			Alive	stage iiia
TCGA-A8-A075-01A	42		M0	N1a	T2	YES			Alive	stage iib
TCGA-PL-A8LV-01A	54		M0	N0	T4				Alive	stage iiib
TCGA-A2-A4RX-01A	67		M0	N0	T2				Alive	stage iia
TCGA-AC-A3YI-01A	74		MX	N3a	T1c	YES			Alive	stage iiic
TCGA-A2-A1FX-01A	61		M0	N2a	T3	YES			Alive	stage iiia
TCGA-D8-A27M-01A	59		M0	N0	T1c	NO			Alive	stage ia
TCGA-A2-A0EW-01A	53		M0	N3a	T1b	YES		1884	Dead	stage iiic
TCGA-D8-A1XW-01A	53		M0	N0	T2	NO			Alive	stage iia
TCGA-BH-A5J0-01A	63		M0	N0	T1c	NO			Alive	stage ia
TCGA-A2-A0SV-01A	63		M1	N2a	T2	YES	YES	825	Dead	stage iv
TCGA-E2-A9RU-01A	90		MX	N3a	T2	YES			Alive	stage iiic
TCGA-BH-A0W5-01A	77		M0	N1a	T1c	YES			Alive	stage iia
TCGA-D8-A141-01A	40		M0	N1	T1c	NO			Alive	not reported
TCGA-E9-A22G-01A	47		M0	N0	T2	NO			Alive	stage iia
TCGA-A7-A3IY-01A	71		M0	N0	T1c	YES			Alive	stage i
TCGA-E2-A15A-01A	45		M0	N3a	T2	YES			Alive	stage iiic
TCGA-E2-A15A-06A	45		M0	N3a	T2	YES			Alive	stage iiic
TCGA-A2-A0ET-01A	58		M0	N2a	T2	YES			Alive	stage iiia
TCGA-OL-A66H-01A	74		MX	N1mi	T1c	YES			Alive	stage ib
TCGA-E2-A1B6-01A	44		M0	N0	T2	NO			Alive	stage iia
TCGA-A8-A08F-01A	59		M0	N3a	T2	YES			Alive	stage iiic
TCGA-A8-A09V-01A	51		M0	N0	T2	YES			Alive	stage iia
TCGA-BH-A0DI-01A	63		M0	N1a	T2	YES			Alive	stage iib
TCGA-BH-A0DI-11A	63		M0	N1a	T2	YES			Alive	stage iib
TCGA-A8-A09X-01A	62		M0	N3a	T2			426	Dead	stage iiic
TCGA-B6-A0RT-01A	39		M0	N1	T3	YES			Alive	stage iiia
TCGA-A7-A3J0-01A	62		M0	N0	T2	YES			Alive	stage iia
TCGA-AR-A2LO-01A	46		M0	N1	T2	YES			Alive	stage iib
TCGA-E2-A1II-01A	51		M0	N0	T1c	YES			Alive	stage i
TCGA-E2-A1II-11A	51		M0	N0	T1c	YES			Alive	stage i
TCGA-HN-A2NL-01A	56		M0	N0	T2				Alive	stage iia
TCGA-BH-A0E7-01A	79		M0	N1a	T2	YES	NO		Alive	stage iib
TCGA-D8-A1JM-01A	59		M0	N1a	T2	YES			Alive	stage iib
TCGA-BH-A0C1-01A	61		M0	N2a	T3	YES		1411	Dead	stage iiia
TCGA-AC-A2FF-01A	40		MX	N1	T2	YES			Alive	stage iib
TCGA-AC-A2FF-11A	40		MX	N1	T2	YES			Alive	stage iib
TCGA-C8-A3M7-01A	60		M0	N0	T4b	YES		1034	Dead	stage iiib
TCGA-C8-A138-01A	54		M0	N2	T2	NO			Alive	stage iiia
TCGA-BH-A1FN-01A	34		M0	N0	T2			2192	Dead	stage iia
TCGA-BH-A1FN-11A	34		M0	N0	T2			2192	Dead	stage iia
TCGA-HN-A2OB-01A	45		M0	N1	T2	YES		1900	Dead	stage iib
TCGA-E9-A249-01A	45		M0	N0 (i-)	T2	YES			Alive	stage iia
TCGA-LD-A9QF-01A	73		M0	N0	T1c	NO			Alive	stage ia
TCGA-B6-A0X1-01A	48		M1	N1	T2	NO		7455	Dead	not reported
TCGA-E2-A107-01A	54		M0	N2a	T3	YES			Alive	stage iiia
TCGA-AQ-A7U7-01A	55		M0	N2a	T2	YES		584	Dead	stage iiia
TCGA-A8-A094-01A	75		M0	N0	T2				Alive	stage iia
TCGA-A2-A04N-01A	66		M0	N0 (i-)	T1c	YES			Alive	stage ia
TCGA-AR-A0TV-01A	66		M0	N0	T2	NO			Alive	stage iia
TCGA-EW-A1P3-01A	48		MX	N0	T2	NO			Alive	stage iia
TCGA-BH-A0H3-01A	46		M0	N0	T1c	YES			Alive	stage i
TCGA-BH-A0H3-11A	46		M0	N0	T1c	YES			Alive	stage i
TCGA-A7-A26J-01A	49		M0	N0	T2	NO			Alive	stage iia
TCGA-A2-A0D0-01A	60		M0	N0 (i-)	T2	NO			Alive	stage iia
TCGA-A2-A0EO-01A	54		M0	N0 (i-)	T1	YES			Alive	stage ia
TCGA-C8-A12T-01A	43		M0	N0	T2				Alive	stage iia
TCGA-PL-A8LY-01A	30		M0	N0	T3	NO			Alive	stage iib
TCGA-BH-A1FB-01A	60		M0	N1b	T2			3669	Dead	stage iib
TCGA-BH-A1FB-11A	60		M0	N1b	T2			3669	Dead	stage iib
TCGA-A2-A0CV-01A	41		M0	N1a	T2	YES			Alive	stage iib
TCGA-A2-A4S1-01A	66		M0	N0	T2	YES			Alive	stage iia
TCGA-3C-AAAU-01A	55		MX	NX	TX	NO			Alive	stage x
TCGA-AC-A6IV-01A	47		MX	N1	T2	YES			Alive	stage iib
TCGA-BH-A0HK-01A	81		M0	N1	T2	NO			Alive	stage iib
TCGA-BH-A0HK-11A	81		M0	N1	T2	NO			Alive	stage iib
TCGA-A8-A09E-01A	73		M0	N1a	T4b	YES			Alive	stage iiib
TCGA-PL-A8LX-01A	35		M1	N1a	T4	NO			Alive	stage iv
TCGA-B6-A0IK-01A	63	489	M0	N1	T4	NO	YES	571	Dead	stage iiib
TCGA-LL-A440-01A	61		MX	N0 (i-)	T1c	NO			Alive	stage ia
TCGA-D8-A3Z5-01A	54		M0	N3a	T2	NO			Alive	stage iiic
TCGA-AO-A03O-01A	69		M0	N0 (i-)	T2	NO		2483	Dead	stage iia
TCGA-AO-A1KQ-01A	84		M0	N1	T4	NO			Alive	stage iiib
TCGA-B6-A408-01A	55		M0	N3a	T2	YES			Alive	stage iiic
TCGA-A8-A082-01A	58		M0	N1a	T2	NO			Alive	stage iib
TCGA-A7-A26F-01A	55		M0	N0	T1	YES			Alive	stage ia
TCGA-A1-A0SM-01A	77		M0	N0 (i-)	T2				Alive	stage iia
TCGA-BH-A0B9-01A	44		M0	N0 (i-)	T1c	YES			Alive	stage ia
TCGA-S3-AA11-01A	67		M0	N0	T2	YES			Alive	stage iia
TCGA-E9-A247-01A	59		M0	N0 (i-)	T1c	YES			Alive	stage ia
TCGA-AO-A1KP-01A	77		M0	N1	T1	NO			Alive	stage iia
TCGA-EW-A1P5-01A	77		M0	N1a	T2	YES			Alive	stage iib
TCGA-LL-A7T0-01A	70		M0	N1a	T2	NO			Alive	stage iib
TCGA-E2-A153-01A	51		M0	N1a	T2	YES			Alive	stage iib
TCGA-E2-A153-11A	51		M0	N1a	T2	YES			Alive	stage iib
TCGA-E9-A1RC-01A	56		M0	N3	T4b				Alive	stage iiic
TCGA-E9-A1RC-11A	56		M0	N3	T4b				Alive	stage iiic
TCGA-E2-A576-01A	69		MX	N0	T1c	YES			Alive	stage ia
TCGA-AO-A0JM-01A	40		M0	N1	T2	YES			Alive	stage iib
TCGA-LL-A6FP-01A	90		MX	NX	T2	NO			Alive	stage iia
TCGA-E9-A245-01A	47		M0	N1	T2	NO			Dead	stage iib
TCGA-BH-A1EW-01A	38		M0	N1b	T2			1694	Dead	stage iia
TCGA-BH-A1EW-11B	38		M0	N1b	T2			1694	Dead	stage iia
TCGA-E2-A10A-01A	41	75	M0	N0 (i-)	T3	YES	YES		Alive	stage iib
TCGA-E2-A14T-01A	52		M0	N0	T2	NO			Alive	stage iia
TCGA-A2-A3XX-01A	49		M0	N0	T2	NO		1439	Dead	stage iia
TCGA-AO-A0JC-01A	64		M0	N0 (i-)	T2	YES			Alive	stage iia
TCGA-E2-A15H-01A	38		M0	N1mi	T1c	NO			Alive	stage iia
TCGA-AO-A124-01A	38		M0	N0 (i-)	T2	NO			Alive	stage iia
TCGA-BH-A202-01A	60		M0	N0	T2	YES			Alive	stage ii
TCGA-AR-A1AQ-01A	49		M0	N0	T2	YES			Alive	stage iia
TCGA-B6-A0RI-01A	44	1100	M0	N1b	T4b	YES	YES		Alive	stage iiib
TCGA-LL-A73Y-01A	67		MX	N0	T1c	NO			Alive	stage ia
TCGA-EW-A6SC-01A	60		M0	N0	T2	YES			Alive	stage iia
TCGA-AR-A1AP-01A	80		M0	N0	T1	NO			Alive	stage i
TCGA-B6-A0IP-01A	74		M0	N0 (i-)	T1c			3926	Dead	stage ia
TCGA-E2-A15P-01A	61		M0	N0	T1c	YES			Alive	stage ia
TCGA-A1-A0SK-01A	54		M0	N0 (i-)	T2			967	Dead	stage iia
TCGA-A8-A08H-01A	66		M0	N0	T2				Alive	stage iia
TCGA-D8-A1XC-01A	85		M0	N1a	T4b	NO		377	Dead	stage iiib
TCGA-AR-A1AR-01A	50	268	M0	N2	T1	YES		524	Dead	stage iiia
TCGA-LL-A6FQ-01A	77		MX	N2a	T2				Alive	stage iiia
TCGA-EW-A1P4-01A	43		M0	N0 (i-)	T2	YES			Alive	stage iia
TCGA-BH-A0HY-01A	60		M0	N0	T1c	NO			Alive	stage i
TCGA-EW-A1PD-01A	61		M0	N1a	T1c	NO			Alive	stage iia
TCGA-BH-A8G0-01A	54		M0	N1a	T2	NO			Alive	stage iib
TCGA-AR-A0U3-01A	59		M0	N1	T2	YES			Alive	stage iib
TCGA-BH-A42V-01A	41		M0	N1mi	T1c	YES			Alive	stage ib
TCGA-C8-A1HN-01A	56		M0	N0	T2	NO			Alive	stage iia
TCGA-AO-A1KR-01A	51		M0	N0	T2	NO			Alive	stage iia
TCGA-A8-A07J-01A	35		M0	N1a	T2	YES			Alive	stage iib
TCGA-BH-A0HW-01A	62		M0	N0 (i-)	T1c	YES			Alive	stage ia
TCGA-A2-A0YI-01A	62		M0	N0 (i+)	T1c	YES			Alive	stage i
TCGA-E9-A248-01A	51		M0	N0 (i-)	T2	NO			Alive	stage iia
TCGA-A7-A2KD-01A	53		MX	N2a	T2	YES			Alive	stage iiia
TCGA-AC-A8OP-01A	72		MX	N0 (i-)	T1c	NO			Alive	stage ia
TCGA-D8-A1J8-01A	77		M0	N1a	T2	NO			Alive	stage iib
TCGA-AN-A0FD-01A	71		M0	N0	T2	NO			Alive	stage iia
TCGA-E2-A106-01A	34		M0	N1mi	T1c	NO			Alive	stage ib
TCGA-GM-A5PV-01A	63		M0	N1a	T2				Alive	stage iib
TCGA-AO-A0J2-01A	41		M0	N0 (i-)	T1c	NO			Alive	stage ia
TCGA-BH-A203-01A	78		M0	N1b	T2			1174	Dead	stage iib
TCGA-BH-A203-11A	78		M0	N1b	T2			1174	Dead	stage iib
TCGA-E9-A226-01A	45		M0	N2	T2	YES		1048	Dead	stage iiia
TCGA-A8-A08C-01A	65		M0	N0	T2	YES			Alive	stage iia
TCGA-BH-A0DL-01A	64		M0	N0	T2	YES			Alive	stage iia
TCGA-BH-A0DL-11A	64		M0	N0	T2	YES			Alive	stage iia
TCGA-A2-A1G6-01A	50		M0	N2a	T2	YES			Alive	stage iiia
TCGA-B6-A0RU-01A	40		M0	N0 (i-)	T1c	YES			Alive	stage ia
TCGA-EW-A2FR-01A	59		MX	N3a	T1b	YES			Alive	stage iiic
TCGA-AO-A125-01A	72		M0	N0 (i-)	T2	NO			Alive	stage iia
TCGA-B6-A3ZX-01A	50		M1	N1	T3	YES		1152	Dead	stage iv
TCGA-EW-A1OY-01A	63		MX	N0	T2	YES			Alive	stage iia
TCGA-BH-A0BM-01A	54		M0	N1a	T2	NO			Alive	stage iib
TCGA-BH-A0BM-11A	54		M0	N1a	T2	NO			Alive	stage iib
TCGA-E9-A5FL-01A	65		M0	N0	T3	NO			Alive	stage iib
TCGA-BH-A0C7-01A	48		M0	N1mi	T2	NO			Alive	stage iib
TCGA-B6-A0I6-01A	49	859	M0	N1	T1c	NO	NO	991	Dead	stage iia
TCGA-A2-A3XZ-01A	46		M0	N0	T1c	NO			Alive	stage i
TCGA-AC-A3QQ-01A	54		MX	N0 (i-)	T1c	NO			Alive	stage ia
TCGA-E2-A105-01A	79		M0	N0 (i-)	T2	YES			Alive	stage iia
TCGA-BH-A1F5-01A	62		M0	N1a	T1c			2712	Dead	stage iia
TCGA-BH-A1F5-11A	62		M0	N1a	T1c			2712	Dead	stage iia
TCGA-D8-A73U-01A	88		M0	N0	T2	NO			Alive	stage iia
TCGA-D8-A145-01A	80		M0	N1a	T1c	NO			Alive	stage iia
TCGA-AR-A0U2-01A	47	1609	M0	N2	T2	YES		2551	Dead	stage iiia
TCGA-D8-A1JH-01A	56		M0	N0	T1c	YES			Alive	stage ia
TCGA-E2-A14X-01A	55		M0	N2	T2	YES			Alive	stage iiia
TCGA-AQ-A54N-01A	51		M0	N0	T2	NO			Alive	stage iia
TCGA-D8-A1JI-01A	54		MX	N1a	T1c	YES			Alive	stage iia
TCGA-E2-A15G-01A	76		M0	N0	T2	YES			Alive	stage iia
TCGA-AC-A6IX-01A	49		MX	N3a	T2	YES			Alive	stage iiic
TCGA-AC-A6IX-06A	49		MX	N3a	T2	YES			Alive	stage iiic
TCGA-A2-A3XV-01A	46		M0	N0	T2	YES			Alive	stage iia
TCGA-BH-A1FD-01A	68		M0	N0	T1c			1009	Dead	stage i
TCGA-BH-A1FD-11B	68		M0	N0	T1c			1009	Dead	stage i
TCGA-D8-A1JF-01A	79		M0	N2a	T1c	NO			Alive	stage iiia
TCGA-BH-A0W4-01A	46		M0	N0 (i-)	T2	NO			Alive	stage iia
TCGA-D8-A3Z6-01A	56		M0	N3a	T3	YES			Alive	stage iiic
TCGA-AR-A24K-01A	46		M0	N0	T2	YES			Alive	stage iia
TCGA-AN-A0FV-01A	58		M0	N0	T2	NO			Alive	stage iia
TCGA-A7-A0CD-01A	66		M0	N0	T1	YES			Alive	stage i
TCGA-E9-A1R6-01A	63		M0	N0	T2	YES			Alive	stage iia
TCGA-E9-A54Y-01A	63		M0	N2	T2	NO			Alive	stage iiia
TCGA-BH-A0DQ-01A	42		M0	N1	T2	YES			Alive	stage iib
TCGA-BH-A0DQ-11A	42		M0	N1	T2	YES			Alive	stage iib
TCGA-D8-A1JA-01A	60	431	M0	NX	T4b	YES	NO		Alive	not reported
TCGA-D8-A1XG-01A	86		M0	N1a	T4b	NO			Alive	stage iiib
TCGA-AC-A8OS-01A	71		MX	N0 (i-)	T2				Alive	stage iia
TCGA-A8-A09K-01A	68		M0	N1	T1c	NO			Alive	stage iia
TCGA-A7-A3IZ-01A	62		M0	N0 (i+)	T2	YES			Alive	stage iia
TCGA-A7-A0D9-01A	37		M0	N0 (i-)	T2	NO			Alive	stage iia
TCGA-A7-A0D9-11A	37		M0	N0 (i-)	T2	NO			Alive	stage iia
TCGA-A2-A25C-01A	50		M0	N1a	T2	YES			Alive	stage iib
TCGA-MS-A51U-01A	44		M0	N1	T2	YES			Alive	stage iib
TCGA-BH-A0BR-01A	59		M0	N0	T1c	YES			Alive	stage i
TCGA-E9-A228-01A	58		M0	N1	T2	NO			Alive	stage iib
TCGA-A8-A07C-01A	57		M0	N0	T2	YES			Alive	stage iia
TCGA-EW-A1IX-01A	48		MX	N1a	T1b	NO			Alive	stage iia
TCGA-EW-A3E8-01B	60		MX	N0	T3	YES			Alive	stage iib
TCGA-A8-A08L-01A	89		M0	N2a	T3	YES		30	Dead	stage iiia
TCGA-OL-A5S0-01A	66		MX	N1a	T2	YES			Alive	stage iib
TCGA-A7-A4SF-01A	54		M0	N0	T2	YES			Alive	stage iia
TCGA-B6-A0X4-01A	62	716	M0	N1b	T2	NO	YES	860	Dead	stage iib
TCGA-E2-A3DX-01A	43		M0	N3	T2	YES			Alive	stage iiic
TCGA-A2-A04T-01A	62		M0	N0 (i-)	T2	YES			Alive	stage iia
TCGA-D8-A1Y3-01A	61		MX	N2a	T2	YES			Alive	stage iiia
TCGA-LQ-A4E4-01A	73		MX	N1a	T3	YES			Alive	stage iiia
TCGA-AQ-A0Y5-01A	70		MX	N2a	T2	NO		172	Dead	stage iiia
TCGA-B6-A0RG-01A	26		M0	N0 (i-)	T3	NO			Alive	stage iib
TCGA-A2-A1FV-01A	74		M0	N0 (i+)	T3	YES			Alive	stage iib
TCGA-BH-A0BG-01A	73		M0	N0	T1	YES			Alive	stage i
TCGA-A8-A09Q-01A	83		M0	N2a	T4b	NO			Alive	stage iiib
TCGA-E2-A15D-01A	47		M0	N0	T2	YES			Alive	stage iia
TCGA-OL-A66N-01A	59		MX	N3	T3	YES			Alive	stage iiic
TCGA-LL-A6FR-01A	50		MX	N0 (i-)	T2	YES			Alive	stage iia
TCGA-A2-A3XS-01A	62	682	M0	N2a	T1	NO	YES	1032	Dead	stage iiia
TCGA-D8-A143-01A	51		M0	N0	T2	NO			Alive	stage iia
TCGA-C8-A273-01A	29		M0	N1	T2	NO			Alive	stage iib
TCGA-AC-A62V-01A	58		M1	N1a	T2	YES		348	Dead	stage iv
TCGA-AO-A0J3-01A	67		M0	N1b	T2	YES			Alive	stage iib
TCGA-D8-A1XV-01A	84		M0	N0	T2	NO			Alive	stage iia
TCGA-A2-A25D-01A	90		M0	N3a	T2	YES			Alive	stage iiic
TCGA-AO-A1KS-01A	69		M0	N0 (i-)	T2	YES			Alive	stage iia
TCGA-AN-A04D-01A	58		M0	N1	T2				Alive	stage iib
TCGA-AR-A0TX-01A	64		M0	N1	T1	YES			Alive	stage iia
TCGA-E2-A15J-01A	51		M0	N0	T1c	NO			Alive	stage i
TCGA-A8-A097-01A	65		M0	N1	T2	YES			Alive	stage iib
TCGA-GM-A3XG-01A	46		M0	N1a	T3	YES			Alive	stage iiia
TCGA-AQ-A1H2-01A	84		MX	N2a	T2	YES			Alive	stage iiia
TCGA-A8-A08Z-01A	76		M0	N3a	T4b				Alive	not reported
TCGA-D8-A13Y-01A	52		M0	N0	T1c	NO			Alive	stage ia
TCGA-AN-A0FZ-01A	45		M0	N2	T2	NO			Alive	stage iiia
TCGA-E2-A109-01A	64		M0	N0 (i-)	T2	NO			Alive	stage iia
TCGA-A7-A6VY-01A	48		M0	N1	T2	YES			Alive	stage iib
TCGA-EW-A1PB-01A	70		MX	N1a	T3	NO			Alive	stage iiia
TCGA-E9-A2JS-01A	72		M0	N1	T2	YES		904	Dead	stage iib
TCGA-E9-A54X-01A	85		M0	N0 (i-)	T1b	NO			Alive	stage ia
TCGA-C8-A130-01A	52		M0	N2	T3	NO			Alive	stage iiia
TCGA-LL-A740-01A	61		MX	N0 (i-)	T1c	NO			Alive	stage ia
TCGA-AO-A1KT-01A	78		M0	N1	T1	YES			Alive	stage iia
TCGA-AO-A0JI-01A	56		M0	N1	T1c	NO			Alive	stage iia
TCGA-E9-A227-01A	42		M0	N1	T2				Alive	stage iib
TCGA-AR-A0TT-01A	53		M0	N2	T2	YES			Alive	stage iiia
TCGA-A2-A0T4-01A	62		M0	N0 (i-)	T2	NO			Alive	stage iia
TCGA-A7-A0CH-01A	79		M0	N0 (i-)	T2	NO			Alive	stage iia
TCGA-A7-A0CH-11A	79		M0	N0 (i-)	T2	NO			Alive	stage iia
TCGA-A8-A08T-01A	64		M1	N1a	T2	NO		3409	Dead	stage iv
TCGA-A8-A08S-01A	71		M0	N1	T1c	YES			Alive	stage iia
TCGA-A7-A425-01A	70		MX	N3a	T3	YES			Alive	stage iiic
TCGA-D8-A27G-01A	75		M0	N0	T2	NO			Alive	stage iia
TCGA-A8-A06R-01A	69		M0	N1a	T2	YES			Alive	stage iib
TCGA-A1-A0SJ-01A	39		M0	N1a	T3				Alive	stage iiia
TCGA-BH-A0HF-01A	77		M0	N0 (i-)	T1c	YES			Alive	stage ia
TCGA-B6-A0IB-01A	64	2717	M1	N3	T3	NO		3941	Dead	stage iv
TCGA-A8-A08O-01A	45		M1	N3a	T2	NO			Alive	stage iv
TCGA-A2-A0YE-01A	48		M0	N1a	T2	YES			Alive	stage iib
TCGA-AO-A0JL-01A	59		M0	N2a	T2	YES			Alive	stage iiia
TCGA-EW-A1P6-01A	64		M0	N1a	T2	YES			Alive	stage iib
TCGA-A2-A0ST-01A	62		M0	N1a	T1c	YES			Alive	stage iia
TCGA-D8-A140-01A	62		M0	N1a	T2	NO			Alive	stage iib
TCGA-LL-A441-01A	62		MX	N0	T1c	YES			Alive	stage ia
TCGA-LD-A7W5-01A	52		M0	N3a	T2	NO			Alive	stage iiic
TCGA-C8-A8HR-01A	49		M0	N2	T3	NO			Alive	stage iiia
TCGA-A2-A0T7-01A	51		M0	N0 (i+)	T2	NO			Alive	stage iia
TCGA-E2-A108-01A	64		M0	N2a	T2	YES			Alive	stage iiia
TCGA-E2-A15R-01A	64		M0	N1a	T1c	YES			Alive	stage iia
TCGA-S3-A6ZH-01A	29		MX	N3a	T3	YES			Alive	stage iiic
TCGA-A8-A07U-01A	66		M0	N2a	T2	YES			Alive	stage iiia
TCGA-C8-A278-01A	61		M0	N2	T2	NO			Alive	stage iiia
TCGA-AN-A0XN-01A	68		M0	N2	T2	NO			Alive	stage iiia
TCGA-BH-A0AU-01A	45		M0	N0	T2	YES			Alive	stage iia
TCGA-BH-A0AU-11A	45		M0	N0	T2	YES			Alive	stage iia
TCGA-A8-A09A-01A	40		M0	NX	T2	YES			Alive	stage x
TCGA-AR-A24P-01A	47		M0	N0	T1				Alive	stage i
TCGA-A8-A07E-01A	81		MX	N3a	T4b	NO			Alive	stage x
TCGA-A8-A09G-01A	79		M0	N3a	T3				Alive	stage iiic
TCGA-AO-A12E-01A	51		M0	N0 (i+)	T3	YES			Alive	stage iib
TCGA-AR-A251-01A	51		M0	N2	T2	YES			Alive	stage iiia
TCGA-WT-AB41-01A	55		MX	N1mi	T2	NO			Alive	stage iib
TCGA-A1-A0SG-01A	61		M0	N1a	T2				Alive	stage iib
TCGA-BH-A0BF-01A	56		M0	N1mi	T2	NO		1324	Dead	stage iib
TCGA-BH-A0BF-11A	56		M0	N1mi	T2	NO		1324	Dead	stage iib
TCGA-E9-A1N9-01A	58		M0	N0	T2	NO			Alive	stage iia
TCGA-E9-A1N9-11A	58		M0	N0	T2	NO			Alive	stage iia
TCGA-AN-A046-01A	68		M0	N0	T2	NO			Alive	stage iia
TCGA-AR-A1AW-01A	65		M0	N0	T2	YES			Alive	stage iia
TCGA-C8-A9FZ-01A	49		M0	N1	T2	YES			Alive	stage iib
TCGA-AR-A0TP-01A	43		M0	N0	T2	YES			Alive	stage iia
TCGA-PE-A5DE-01A	41		M0	N0	T2	YES			Alive	stage iia
TCGA-A2-A0D1-01A	76		M0	N0 (i-)	T2	YES			Alive	stage iia
TCGA-E2-A1L7-01A	40		M0	N2	T2	YES			Alive	stage iiia
TCGA-E2-A1L7-11A	40		M0	N2	T2	YES			Alive	stage iiia
TCGA-C8-A1HO-01A	34		M0	N3	T3	NO			Alive	stage iiic
TCGA-EW-A1J6-01A	70		M0	N0 (i-)	T1c	NO			Alive	stage i
TCGA-AN-A0FN-01A	61		M0	N0	T1c	NO			Alive	stage ia
TCGA-D8-A142-01A	74		M0	N0	T3	NO			Alive	stage iib
TCGA-E2-A1IF-01A	74		M0	N0	T1c	NO			Alive	stage i
TCGA-E2-A1IF-11A	74		M0	N0	T1c	NO			Alive	stage i
TCGA-E2-A573-01A	48		M0	N0	T1c	YES			Alive	stage ia
TCGA-EW-A6SD-01A	32		M0	N1a	T2				Alive	stage iib
TCGA-EW-A1J1-01A	38		M0	N1a	T2	YES			Alive	stage iib
TCGA-A2-A3KC-01A	55		M0	N1a	T2	YES			Alive	stage iib
TCGA-GI-A2C8-01A	63		MX	N0	T4b	YES			Alive	stage iiib
TCGA-GI-A2C8-11A	63		MX	N0	T4b	YES			Alive	stage iiib
TCGA-A8-A07B-01A	69		M0	N0	T2	NO			Alive	stage iia
TCGA-EW-A1OZ-01A	56		M0	N0 (i-)	T2	NO			Alive	stage iia
TCGA-E9-A1RD-01A	67		M0	N0	T2				Alive	stage iia
TCGA-E9-A1RD-11A	67		M0	N0	T2				Alive	stage iia
TCGA-A1-A0SO-01A	67		M0	N1	T2				Alive	stage iib
TCGA-A1-A0SD-01A	59		M0	N0	T2				Alive	stage iia
TCGA-E9-A3Q9-01A	78		M0	N3	T3	NO			Alive	stage iiic
TCGA-A8-A07O-01A	51		M0	N0	T2	YES			Alive	stage iia
TCGA-AR-A1AJ-01A	83		M0	N0	T1	YES			Alive	stage i
TCGA-D8-A1Y1-01A	80		MX	N1a	T3	NO		302	Dead	stage iiia
TCGA-3C-AALK-01A	52		M0	N0 (i+)	T1c	NO			Alive	stage ia
TCGA-AO-A129-01A	29		M0	N1a	T2	YES			Alive	stage iib
TCGA-B6-A0X0-01A	54		M0	N0 (i-)	T1c	NO		3945	Dead	stage i
TCGA-BH-A0BA-01A	51		M0	N3a	T3	YES			Alive	stage iiic
TCGA-BH-A0BA-11A	51		M0	N3a	T3	YES			Alive	stage iiic
TCGA-BH-A0AZ-01A	47		cM0 (i+)	N1a	T3	NO			Alive	stage iiia
TCGA-BH-A0AZ-11A	47		cM0 (i+)	N1a	T3	NO			Alive	stage iiia
TCGA-LL-A7SZ-01A	49		MX	N1a	T2	YES			Alive	stage iib
TCGA-E9-A22B-01A	71		M0	N0	T1c	NO			Alive	stage ia
TCGA-D8-A27E-01A	66		M0	N0	T1c	YES			Alive	stage ia
TCGA-A2-A25F-01A	66		M0	N0 (i-)	T2	YES			Alive	stage iia
TCGA-BH-A0DH-01A	63		M0	N1a	T2	YES			Alive	stage iib
TCGA-BH-A0DH-11A	63		M0	N1a	T2	YES			Alive	stage iib
TCGA-BH-A0BW-01A	71		M0	N0	T1c	YES			Alive	stage i
TCGA-BH-A0BW-11A	71		M0	N0	T1c	YES			Alive	stage i
TCGA-BH-A1EU-01A	83		M0	N0	T1			1286	Dead	stage i
TCGA-BH-A1EU-11A	83		M0	N0	T1			1286	Dead	stage i
TCGA-D8-A1JU-01A	51		M0	N0	T1c	NO			Alive	stage ia
TCGA-BH-A0RX-01A	59		M0	N0 (i-)	T2	YES			Alive	stage iia
TCGA-D8-A1X8-01A	62		M0	N2a	T1c	YES			Alive	stage iiia
TCGA-S3-AA10-01A	65		M0	N0	T2	NO			Alive	stage iia
TCGA-C8-A1HI-01A	40		M0	N2	T2	NO			Alive	stage iiia
TCGA-AN-A0FK-01A	88		M0	N0	T4	NO			Alive	stage iiib
TCGA-BH-A0BC-01A	60		M0	N3	T2	YES			Alive	stage iiic
TCGA-BH-A0BC-11A	60		M0	N3	T2	YES			Alive	stage iiic
TCGA-BH-A1FM-01A	44		M0	N2	T2			1388	Dead	stage iiia
TCGA-BH-A1FM-11B	44		M0	N2	T2			1388	Dead	stage iiia
TCGA-AR-A252-01A	50		M0	N0	T1	YES			Alive	stage i
TCGA-E9-A1NF-01A	60		M0	N0	T2	NO		1072	Dead	stage iia
TCGA-E9-A1NF-11A	60		M0	N0	T2	NO		1072	Dead	stage iia
TCGA-E2-A15E-01A	40		M0	N1a	T1c	YES			Alive	stage iia
TCGA-E2-A15E-06A	40		M0	N1a	T1c	YES			Alive	stage iia
TCGA-EW-A1OV-01A	56		MX	N1mi	T2	NO			Alive	stage iib
TCGA-E2-A14W-01A	78		M0	N0	T2	NO			Alive	stage iia
TCGA-5L-AAT0-01A	42		M0	N0	T2				Alive	stage iia
TCGA-GM-A5PX-01A	65		M0	N1mi	T2				Alive	stage iib
TCGA-A7-A26H-01A	72		M0	N1a	T1	NO			Alive	stage iia
TCGA-A7-A6VX-01A	68		M0	N0	T2	YES			Alive	stage iia
TCGA-B6-A0IH-01A	81		M0	N1b	T3	YES		2965	Dead	stage iiia
TCGA-A8-A083-01A	67		M0	N0	T3				Alive	stage iib
TCGA-E2-A14R-01A	62	971	M0	N0	T2	YES	NO		Alive	stage iia
TCGA-AC-A8OQ-01A	72		MX	N1a	T2				Alive	stage iib
TCGA-BH-A0E9-01B	53		M0	N1a	T2	YES			Alive	stage iib
TCGA-BH-A0H7-01A	65		M0	N2a	T1c	YES			Alive	stage iiia
TCGA-BH-A0H7-11A	65		M0	N2a	T1c	YES			Alive	stage iiia
TCGA-AN-A0FT-01A	63		M0	N1	T2	NO			Alive	stage iib
TCGA-B6-A0I2-01A	45		M0	N0 (i-)	T1c	YES			Alive	stage ia
TCGA-A2-A25B-01A	39		M0	N1	T2	YES			Alive	stage iib
TCGA-BH-A0BV-01A	78		M0	N1a	T2	NO			Alive	stage iib
TCGA-BH-A0BV-11A	78		M0	N1a	T2	NO			Alive	stage iib
TCGA-AR-A24M-01A	38		M0	N2	T2	YES			Alive	stage iiia
TCGA-B6-A0I9-01A	62		M1	NX	T3	YES		362	Dead	stage iv
TCGA-C8-A12Z-01A	45		M0	N1	T2	NO			Alive	stage iib
TCGA-C8-A12X-01A	62		M0	N1	T2	NO			Alive	stage iib
TCGA-EW-A1J5-01A	59		M0	N0 (i-)	T3	NO			Alive	stage iib
TCGA-D8-A1XZ-01A	81		MX	N2a	T1c	YES			Alive	stage iiia
TCGA-LL-A442-01A	56		MX	N0 (i-)	T2	NO			Alive	stage iia
TCGA-AC-A8OR-01A	75		MX	N0 (i-)	T1c				Alive	stage ia
TCGA-E2-A1L9-01A	40		M0	N1mi	T1c	YES			Alive	stage iia
TCGA-D8-A1JB-01A	54		M0	N1a	T2	YES			Alive	stage iib
TCGA-BH-A0DV-01A	54		M0	N2a	T2	YES			Alive	stage iiia
TCGA-BH-A0DV-11A	54		M0	N2a	T2	YES			Alive	stage iiia
TCGA-E9-A229-01A	37		M0	N0	T1c	YES			Alive	stage ia
TCGA-C8-A12M-01A	70		M0	N0 (i-)	T2	NO			Alive	stage iia
TCGA-AN-A041-01A	29		M0	N1a	T2	NO			Alive	stage iib
TCGA-A2-A0D3-01A	42		M0	N0 (i-)	T1c	NO			Alive	stage ia
TCGA-A8-A093-01A	61		M0	N0	T2	YES			Alive	stage iia
TCGA-OL-A5D7-01A	70		MX	N0	T2	YES			Alive	stage iia
TCGA-AO-A12A-01A	47		M0	N0 (i+)	T2	NO			Alive	stage iia
TCGA-C8-A27A-01A	48		M0	N1	T2	NO			Alive	stage iib
TCGA-D8-A1XD-01A	36		M0	N2a	T1c	YES			Alive	stage iiia
TCGA-A7-A0DB-01A	56		M0	N0 (i-)	T2	YES			Alive	stage iia
TCGA-A7-A0DB-11A	56		M0	N0 (i-)	T2	YES			Alive	stage iia
TCGA-D8-A27N-01A	36		M0	N2a	T2	NO			Alive	stage iiia
TCGA-AO-A0J4-01A	41		M0	N0 (i-)	T1c	YES			Alive	stage ia
TCGA-C8-A132-01A	56		M0	N1	T2	NO			Alive	stage iib
TCGA-E9-A1R3-01A	70		M0	N3	T2				Alive	stage iiic
TCGA-BH-A0GY-01A	67		M0	N1	T2	YES	NO		Alive	stage iia
TCGA-C8-A131-01A	82		M0	N2	T2	NO			Alive	stage iiia
TCGA-A7-A0DC-01A	63		M0	N0 (i-)	T1c	YES			Alive	stage ia
TCGA-A7-A0DC-11A	63		M0	N0 (i-)	T1c	YES			Alive	stage ia
TCGA-E2-A154-01A	68		M0	N0	T1c	YES			Alive	stage i
TCGA-S3-A6ZF-01A	64		M0	N0	T2	NO			Alive	stage iia
TCGA-A8-A08P-01A	70		M0	N2a	T2	YES			Alive	stage iiia
TCGA-A2-A0T1-01A	55		M0	N3	T3	YES			Alive	stage iiic
TCGA-BH-A18U-01A	72		M0	N2a	T2			1563	Dead	stage iiia
TCGA-BH-A18U-11A	72		M0	N2a	T2			1563	Dead	stage iiia
TCGA-BH-A0DS-01A	71		M0	N2a	T2	YES			Alive	stage iiia
TCGA-AN-A0FX-01A	52		M0	N0	T2	NO			Alive	stage iia
TCGA-A7-A26I-01A	65		M0	N0	T2	YES			Alive	stage iia
TCGA-AR-A2LN-01A	65		M0	N0	T2	NO			Alive	stage iia
TCGA-E2-A1LK-01A	84	155	M0	N3a	T4b	NO	NO	266	Dead	stage iiic
TCGA-E2-A1LK-11A	84	155	M0	N3a	T4b	NO	NO	266	Dead	stage iiic
TCGA-AO-A03U-01B	31	1614	M0	N0 (i-)	T1c	NO		1793	Dead	stage i
TCGA-EW-A423-01A	75		MX	N0	T2	YES			Alive	stage iia
TCGA-3C-AALJ-01A	62		M0	N1a	T2	NO			Alive	stage iib
TCGA-BH-A1FC-01A	78		M0	N1b	T1c			3472	Dead	stage iia
TCGA-BH-A1FC-11A	78		M0	N1b	T1c			3472	Dead	stage iia
TCGA-A2-A259-01A	70		M0	N0 (i-)	T1c	NO			Alive	stage i
TCGA-GM-A2DD-01A	53		M0	N0 (i-)	T1c	NO			Alive	stage i
TCGA-AR-A2LK-01A	62		M0	N2	T3	YES		1649	Dead	stage iii
TCGA-GM-A2DF-01A	53		M0	N1a	T1c	YES			Alive	stage iia
TCGA-E2-A14S-01A	65		M0	N0	T1c	YES			Alive	stage i
TCGA-A7-A4SA-01A	40		M0	N1a	T2	NO			Alive	stage iib
TCGA-A7-A4SA-11A	40		M0	N1a	T2	NO			Alive	stage iib
TCGA-A2-A0SU-01A	66		M0	N0 (i+)	T2	NO			Alive	stage iia
TCGA-3C-AALI-01A	50		M0	N1a	T2	YES			Alive	stage iib
TCGA-E2-A1LB-01A	41		M0	N1	T2	YES			Alive	stage iib
TCGA-E2-A1LB-11A	41		M0	N1	T2	YES			Alive	stage iib
TCGA-E2-A1B5-01A	46		M0	N0	T2	YES			Alive	stage iia
TCGA-E2-A1B5-11A	46		M0	N0	T2	YES			Alive	stage iia
TCGA-AN-A0AJ-01A	79		M0	N0	T3	NO			Alive	stage iib
TCGA-AR-A2LQ-01A	59		M0	N0	T3	YES			Alive	stage iib
TCGA-A8-A06N-01A	66		M0	N0	T4b				Alive	stage iiib
TCGA-OL-A5RW-01A	40		MX	N1	T1c	YES			Alive	stage iia
TCGA-EW-A1PE-01A	56		M0	N1a	T1c	YES			Alive	stage iia
TCGA-A8-A084-01A	81		M0	N1a	T2	YES			Alive	stage iib
TCGA-E9-A1QZ-01A	61		M0	N0	T2	NO			Alive	stage iia
TCGA-BH-A18N-01A	88		M0	N1b	T2	NO		468	Dead	stage iia
TCGA-BH-A18N-11A	88		M0	N1b	T2	NO		468	Dead	stage iia
TCGA-AO-A0JA-01A	36	143	M0	N3	T2	NO			Alive	stage iiic
TCGA-A8-A09I-01A	84		M0	N0	T2	NO			Alive	stage iia
TCGA-S3-AA14-01A	47		cM0 (i+)	N0 (i+)	T1	YES			Alive	stage i
TCGA-BH-A0E6-01A	69		M0	N0 (i-)	T1c	YES			Alive	stage ia
TCGA-B6-A0RE-01A	61		M0	N0 (i-)	TX	YES			Alive	stage x
TCGA-A2-A0T6-01A	50		M0	N0 (i-)	T3	YES			Alive	stage iib
TCGA-C8-A12Q-01A	78		M0	N2	T1	NO		385	Dead	stage iiia
TCGA-AR-A254-01A	50		M0	N2	T2	YES			Alive	stage iiia
TCGA-D8-A1XU-01A	56		M0	N0	T1c	NO			Alive	stage ia
TCGA-A1-A0SP-01A	40		M0	N0 (i-)	T2				Alive	stage iia
TCGA-A8-A0A7-01A	57		M0	N1a	T2				Alive	stage iib
TCGA-E2-A14V-01A	53		M0	N1	T2	YES			Alive	stage iib
TCGA-BH-A0H5-01A	45		M0	N0 (i-)	T1c	NO			Alive	stage i
TCGA-BH-A0H5-11A	45		M0	N0 (i-)	T1c	NO			Alive	stage i
TCGA-A8-A090-01A	74		M0	N0	T2				Alive	stage iia
TCGA-E9-A1NA-01A	58		M0	N0	T2	YES			Alive	stage iia
TCGA-E9-A1NA-11A	58		M0	N0	T2	YES			Alive	stage iia
TCGA-AC-A3OD-01A	68		MX	N1mi	T2	YES			Alive	stage iib
TCGA-A2-A0CR-01A	54		M0	N0	T3	NO			Alive	stage iib
TCGA-E9-A22A-01A	74		M0	N0	T2	NO			Alive	stage iia
TCGA-A7-A0DA-01A	62		M0	N0 (i-)	T2	YES			Alive	stage iia
TCGA-D8-A1JE-01A	62		M0	N1a	T1c	NO			Alive	stage iia
TCGA-AR-A1AO-01A	47		M0	N1	T1	YES			Alive	stage iia
TCGA-E9-A6HE-01A	45		MX	N3	T3	YES			Alive	stage iiic
TCGA-AR-A2LM-01A	49		M0	N1	T1	NO			Alive	stage ii
TCGA-E9-A3X8-01A	48		M0	N1	T2	YES			Alive	stage iib
TCGA-A7-A4SE-01A	54		M0	N0	T2	NO			Alive	stage iia
TCGA-A7-A4SE-11A	54		M0	N0	T2	NO			Alive	stage iia
TCGA-EW-A1PA-01A	59		M0	N1a	T2	YES			Alive	stage iib
TCGA-D8-A1JS-01A	77		M0	N0	T1c	NO			Alive	stage ia
TCGA-AR-A1AI-01A	47		M0	N0	T2	NO			Alive	stage iia
TCGA-E9-A1R4-01A	66		M0	N0	T1c				Alive	stage ia
TCGA-A8-A07I-01A	69		M0	N2a	T2	YES			Alive	stage iiia
TCGA-A2-A4S3-01A	59		M0	N1a	T2				Alive	stage iib
TCGA-OL-A66I-01A	36		MX	N1mi	T1c	YES			Alive	stage iia
TCGA-B6-A0IC-01A	90		MX	NX	T2	NO		0	Dead	stage x
TCGA-A2-A04V-01A	39	1470	M0	N0 (i-)	T2	NO	YES	1920	Dead	stage iia
TCGA-GM-A2DI-01A	52		M0	N0 (i+)	T1c	NO			Alive	stage i
TCGA-GM-A2DI-11A	52		M0	N0 (i+)	T1c	NO			Alive	stage i
TCGA-5T-A9QA-01A	52		MX	NX	T2	YES			Alive	stage iia
TCGA-E2-A14O-01A	76		M0	N1a	T3	YES			Alive	stage iiia
TCGA-A2-A0YG-01A	63		M0	N3a	T2	YES			Alive	stage iiic
TCGA-AQ-A04J-01A	45		M0	N0 (i+)	T2	NO			Alive	stage iia
TCGA-BH-A0E1-01A	52		M0	N1	T2	NO			Alive	stage iib
TCGA-BH-A0E1-11A	52		M0	N1	T2	NO			Alive	stage iib
TCGA-EW-A1P1-01A	68	1014	MX	N3b	T2	YES	NO		Alive	stage iiic
TCGA-GM-A2DB-01A	62		M0	N0 (i-)	T2	YES			Alive	stage iia
TCGA-C8-A26Y-01A	90		M0	N0	T2	NO			Alive	stage iia
TCGA-C8-A12N-01A	58		M0	N0 (i-)	T2	NO			Alive	stage iia
TCGA-AR-A24R-01A	45		M0	N2	T1	YES			Alive	stage iiia
TCGA-D8-A27I-01A	58		M0	N2a	T1c	YES			Alive	stage iiia
TCGA-A8-A099-01A	76		MX	N3a	T4b	YES			Alive	stage x
TCGA-A8-A0A1-01A	84		M0	N0	T2				Alive	stage iia
TCGA-A2-A3Y0-01A	57		M0	N1a	T2	NO			Alive	stage iib
TCGA-B6-A0IG-01A	50		M0	N1b	T2	YES		4456	Dead	stage iib
TCGA-D8-A27W-01A	55		M0	N0	T4b	YES			Alive	stage iiib
TCGA-AN-A0XP-01A	69		M0	N2	T2	NO			Alive	stage iiia
TCGA-W8-A86G-01A	66		MX	N0 (i-)	T2a	NO			Alive	stage iia
TCGA-GM-A2DL-01A	50		M0	N0 (i-)	T1c	YES			Alive	stage i
TCGA-E2-A159-01A	50		M0	N0	T2	YES			Alive	stage iia
TCGA-BH-A0DP-01A	60		M0	N0 (i-)	T3	YES			Alive	stage iib
TCGA-BH-A0DP-11A	60		M0	N0 (i-)	T3	YES			Alive	stage iib
TCGA-A8-A08R-01A	52		M0	N1a	T2				Alive	stage iib
TCGA-D8-A1X5-01A	81		MX	N3a	T2	YES			Alive	stage iiic
TCGA-C8-A12O-01A	50		M0	N0 (i-)	T2	NO			Alive	stage iia
TCGA-BH-A0WA-01A	82		M0	N0 (i-)	T1c	NO			Alive	stage i
TCGA-AR-A1AN-01A	46		M0	N0	T2	YES			Alive	stage iia
TCGA-BH-A18R-01A	50		M0	N1	T2b			1142	Dead	stage iia
TCGA-BH-A18R-11A	50		M0	N1	T2b			1142	Dead	stage iia
TCGA-B6-A402-01A	47		M0	N0 (i-)	T1c	YES			Alive	stage i
TCGA-E9-A1RE-01A	74		M0	N2	T2	YES			Alive	stage iiia
TCGA-AQ-A04L-01A	48		MX	N0 (i-)	T2	NO			Alive	stage iia
TCGA-A2-A0CO-01A	85		M0	N0	T3	YES		1468	Dead	stage iib
TCGA-AN-A0AR-01A	55		M0	N0	T2	NO			Alive	stage iia
TCGA-AR-A0TQ-01A	27		M0	N1	T3	YES			Alive	stage iiia
TCGA-BH-A1FH-01A	47		M1	N1b	T2			1034	Dead	stage iv
TCGA-BH-A1FH-11B	47		M1	N1b	T2			1034	Dead	stage iv
TCGA-AN-A04A-01A	36		M0	N2	T2				Alive	stage iiia
TCGA-E2-A1IH-01A	80		M0	N0	T1c	NO			Alive	stage i
TCGA-BH-A1EV-01A	45		M0	N1b	T3	YES		365	Dead	stage iiia
TCGA-BH-A1EV-11A	45		M0	N1b	T3	YES		365	Dead	stage iiia
TCGA-A8-A0AD-01A	83		M0	N0	T1c	NO			Alive	stage i
TCGA-GM-A2DK-01A	58		M0	N0 (i-)	T1c	YES			Alive	stage i
TCGA-E2-A1IU-01A	60		M0	N0 (mol+)	T1c	NO			Alive	stage ia
TCGA-E2-A1IU-11A	60		M0	N0 (mol+)	T1c	NO			Alive	stage ia
TCGA-A8-A07Z-01A	85		M0	N0	T2	NO			Alive	stage iia
TCGA-A8-A06O-01A	60		M0	N0	T1c	NO			Alive	stage i
TCGA-C8-A8HQ-01A	53		M0	N1	T2	NO			Alive	stage iib
TCGA-BH-A28Q-01A	46		M0	N1a	T2	NO			Alive	stage iib
TCGA-A2-A0YT-01A	56		M0	N2a	T4b	YES		723	Dead	stage iiib
TCGA-E9-A1RF-01A	68		M0	N2	T2				Alive	stage iiia
TCGA-E9-A1RF-11A	68		M0	N2	T2				Alive	stage iiia
TCGA-C8-A12U-01A	46		M0	N1	T2	NO			Alive	stage iib
TCGA-AO-A1KO-01A	46		M0	N0 (i+)	T3	NO			Alive	stage iib
TCGA-B6-A0WX-01A	40	563	M0	N1b	T3	NO	NO	639	Dead	stage iiia
TCGA-GM-A4E0-01A	67		M0	N3a	T3	YES			Alive	stage iiic
TCGA-BH-A0AY-01A	62		M0	N0 (i-)	T2	NO			Alive	stage iia
TCGA-BH-A0AY-11A	62		M0	N0 (i-)	T2	NO			Alive	stage iia
TCGA-OL-A5RU-01A	63		MX	N1	T1c	YES			Alive	stage iia
TCGA-AO-A0JD-01A	59		M0	N1a	T3	YES			Alive	stage iiia
TCGA-AC-A2QI-01A	76		MX	N1a	T3	YES			Alive	stage iiia
TCGA-BH-A0B5-01A	40		M0	N2a	T2	YES			Alive	stage iiia
TCGA-BH-A0B5-11A	40		M0	N2a	T2	YES			Alive	stage iiia
TCGA-AN-A0XV-01A	67		M0	N2	T2	NO			Alive	stage iiia
TCGA-E9-A295-01A	71		M0	N0 (i-)	T2	YES			Alive	stage iia
TCGA-C8-A275-01A	56		M0	N1	T1				Alive	stage iia
TCGA-E9-A1R7-01A	64		M0	N0	T2	YES			Alive	stage iia
TCGA-E9-A1R7-11A	64		M0	N0	T2	YES			Alive	stage iia
TCGA-BH-A0HP-01A	65		M0	N2a	T3	YES			Alive	stage iiia
TCGA-BH-A0DX-01A	62		M0	N0	T1b	YES			Alive	stage i
TCGA-A1-A0SN-01A	50		MX	N1	T1c				Alive	stage iia
TCGA-AC-A2BK-01A	78		MX	N2a	T2	YES			Alive	stage iiia
TCGA-AC-A2BK-11A	78		MX	N2a	T2	YES			Alive	stage iiia
TCGA-E2-A1B0-01A	50		M0	N2	T2	YES			Alive	stage iiia
TCGA-B6-A1KI-01A	63		M0	N0	T1c	YES			Alive	stage i
TCGA-AO-A0JB-01A	50		M0	N1a	T3	YES			Alive	stage iiia
TCGA-AC-A2FE-01A	62		MX	N3a	T3	YES		2636	Dead	stage iiic
TCGA-AC-A2FE-11B	62		MX	N3a	T3	YES		2636	Dead	stage iiic
TCGA-C8-A12Y-01A	44		M0	N1	T2	YES			Alive	stage iib
TCGA-BH-A0HX-01A	54		M0	N1a	T2	NO			Alive	stage iib
TCGA-B6-A0IM-01A	75		M0	N0 (i-)	T3	NO		3873	Dead	stage iib
TCGA-AR-A1AH-01A	51		M0	N1	T2	NO			Alive	stage iib
TCGA-AN-A049-01A	62		M0	N0	T2				Alive	stage iia
TCGA-BH-A0B4-01A	65		M0	N2	T2	YES			Alive	stage iiia
TCGA-OL-A66K-01A	72		MX	N0	T2	NO		1275	Dead	stage iia
TCGA-E9-A1RH-01A	63		M0	N0	T2	YES			Alive	stage iia
TCGA-E9-A1RH-11A	63		M0	N0	T2	YES			Alive	stage iia
TCGA-BH-A0BD-01A	47		M0	N1a	T1c	YES			Alive	stage iia
TCGA-AR-A2LE-01A	69		M0	N0	T1	YES			Alive	stage i
TCGA-BH-A0AW-01A	56		M0	N1a	T1c	YES			Alive	stage iia
TCGA-A2-A0YK-01A	61		M0	N0 (i-)	T2	NO			Alive	stage iia
TCGA-GM-A3NY-01A	72		M0	N1a	T2	YES			Alive	stage iib
TCGA-D8-A1X7-01A	40		MX	N0	T2	NO			Alive	stage iia
TCGA-A8-A07R-01A	80		M0	N3a	T2				Alive	stage iiic
TCGA-A2-A0CT-01A	71		M0	N0 (i-)	T2	NO			Alive	stage iia
TCGA-AR-A1AY-01A	65		M0	N0	T1	YES			Alive	stage i
TCGA-A2-A25E-01A	34		M0	N2a	T2	YES			Alive	stage iiia
TCGA-BH-A42T-01A	75		M0	N0 (i+)	T2	NO		320	Dead	stage iia
TCGA-EW-A1P7-01A	59	729	M0	N0 (i-)	T2	NO	YES		Alive	stage iia
TCGA-A2-A0CM-01A	40	382	M0	N0 (i-)	T2	NO	YES	754	Dead	stage iia
TCGA-E9-A243-01A	52		M0	N0 (i-)	T2				Alive	stage iia
TCGA-B6-A0IN-01A	45	1412	MX	NX	T1c	NO	YES	2573	Dead	stage x
TCGA-A2-A0CU-01A	73		M0	N0 (i+)	T2	NO		158	Dead	stage iia
TCGA-E9-A1N5-01A	45		M0	N1	T2	NO			Alive	stage iib
TCGA-E9-A1N5-11A	45		M0	N1	T2	NO			Alive	stage iib
TCGA-B6-A0WT-01A	61	3862	M0	N1	T2	NO	YES		Alive	stage iib
TCGA-AC-A3TM-01A	50		M0	N1mi	T3	YES			Alive	stage iiia
TCGA-AQ-A04H-01B	61		MX	N2a	T2	YES			Alive	stage iiia
TCGA-BH-A42U-01A	80		M0	N0	T2	NO			Alive	stage iia
TCGA-BH-A0B6-01A	47		M0	N0	T1c	YES			Alive	stage i
TCGA-A2-A0EP-01A	56		M0	N0 (i+)	T1	NO			Alive	stage i
TCGA-AC-A7VC-01A	56		MX	N0	T3				Alive	stage iib
TCGA-A2-A0T2-01A	66		M1	N3	T3	NO	NO	255	Dead	stage iv
TCGA-A8-A06P-01A	63		M0	N2a	T1c	YES			Alive	stage iiia
TCGA-AN-A04C-01A	51		M0	N1	T2				Alive	stage iib
TCGA-E2-A10E-01A	64		M0	N1a	T1c	YES			Alive	stage iia
TCGA-B6-A0RQ-01A	68		M0	N0 (i-)	T3	NO		4267	Dead	stage iib
TCGA-A2-A0T3-01A	37		M0	N1mi	T1c	YES			Alive	stage ib
TCGA-EW-A1J2-01A	50		MX	N1mi	T1c	NO			Alive	not reported
TCGA-E2-A1LS-01A	46		M0	N0	T1c	NO			Alive	stage ia
TCGA-E2-A1LS-11A	46		M0	N0	T1c	NO			Alive	stage ia
TCGA-A7-A6VV-01A	51		M0	N0	T2	NO			Alive	stage iia
TCGA-A2-A0EQ-01A	64		M0	N0 (i-)	T2	YES			Alive	stage iia
TCGA-A2-A0CZ-01A	46		M0	N0 (i-)	T2	NO			Alive	stage iia
TCGA-GM-A2DC-01A	57		M0	N1a	T1c	YES			Alive	stage iia
TCGA-A8-A08A-01A	89		M0	N0	T1c				Alive	stage i
TCGA-A2-A0T0-01A	59		M0	N1	T2	YES			Alive	stage iib
TCGA-D8-A147-01A	45		M0	N0	T2	YES			Alive	not reported
TCGA-BH-A1FJ-01A	66		M0	N1b	T3			1927	Dead	stage iiia
TCGA-BH-A1FJ-11B	66		M0	N1b	T3			1927	Dead	stage iiia
TCGA-A2-A4RW-01A	49		M0	N3a	T2				Alive	stage iiic
TCGA-AC-A2FB-01A	65		MX	N0	T2	NO			Alive	stage iia
TCGA-AC-A2FB-11A	65		MX	N0	T2	NO			Alive	stage iia
TCGA-A2-A0YL-01A	48		M0	N2a	T3	YES			Alive	stage iiia
TCGA-BH-A0H6-01A	82		M0	NX	T1b	YES			Alive	stage i
TCGA-E9-A22E-01A	56		M0	N2	T2	YES			Alive	stage iiia
TCGA-AR-A0U1-01A	36		M0	N1	T2	YES			Alive	stage iib
TCGA-AO-A03L-01A	34		M0	N2	T3	YES			Alive	stage iiia
TCGA-BH-A0HN-01A	67		M0	N0 (i-)	T1c	NO			Alive	stage ia
TCGA-S3-A6ZG-01A	71		M0	N1	T2	YES			Alive	stage iib
TCGA-AQ-A54O-01A	51		M0	N0	T2	NO			Alive	stage iia
TCGA-A2-A1FZ-01A	63		M0	N0 (i-)	T2	NO			Alive	stage iia
TCGA-E2-A1IJ-01A	57		M0	N0	T1c	YES			Alive	stage i
TCGA-A2-A1G1-01A	85		M0	N1	T2	YES			Alive	stage iib
TCGA-GI-A2C9-01A	58		MX	N0	T3	YES			Alive	stage iib
TCGA-GI-A2C9-11A	58		MX	N0	T3	YES			Alive	stage iib
TCGA-A2-A0T5-01A	39		M0	N0 (i-)	T2	NO			Alive	stage iia
TCGA-E2-A14P-01A	79		M0	N3	T2	YES			Alive	stage iiic
TCGA-XX-A899-01A	46		MX	N2a	T1c	YES			Alive	stage iiia
TCGA-XX-A899-11A	46		MX	N2a	T1c	YES			Alive	stage iiia
TCGA-E2-A1B1-01A	45		M0	N1	T2	YES			Alive	stage iib
TCGA-B6-A0RV-01A	42		M0	N2	T3	YES			Alive	stage iiia
TCGA-A8-A06Q-01A	63		M0	N2	T3				Alive	stage iiia
TCGA-B6-A0IJ-01A	42		M0	N0 (i-)	T3	NO			Alive	stage iib
TCGA-EW-A1J3-01A	61		M0	N0	T1c	NO			Alive	stage ia
TCGA-A2-A0EX-01A	46		M0	N0 (i+)	T3	NO			Alive	stage iib
TCGA-A7-A13F-01A	44		M0	N1a	T3	YES			Alive	stage iiia
TCGA-A7-A13F-11A	44		M0	N1a	T3	YES			Alive	stage iiia
TCGA-B6-A0I5-01A	49		M0	N1b	T2	NO			Alive	stage iib
TCGA-C8-A26V-01A	47		M0	N2	T3	YES			Alive	stage iiia
TCGA-EW-A1P8-01A	58	207	M0	N3b	T2	NO		239	Dead	stage iiic
TCGA-OL-A97C-01A	67		M0	N0	T3	NO			Alive	stage iib
TCGA-AR-A255-01A	62		M0	N0	T1	YES			Alive	stage i
TCGA-A8-A09D-01A	47		M0	N1	T2	YES			Alive	stage iib
TCGA-BH-A0DD-01A	58		M0	N1a	T2	NO			Alive	stage iib
TCGA-BH-A0DD-11A	58		M0	N1a	T2	NO			Alive	stage iib
TCGA-EW-A1OX-01A	43		MX	N0	T2	YES			Alive	stage iia
TCGA-A2-A0EM-01A	73		M0	N0 (i-)	T1	YES			Alive	stage ia
TCGA-A8-A0A9-01A	80		M0	N0	T2	YES			Alive	stage iia
TCGA-C8-A1HF-01A	48		M0	N0	T2	NO			Alive	stage iia
TCGA-E9-A22H-01A	42		M0	N1	T2	YES			Alive	stage iib
TCGA-AR-A1AX-01A	64		M0	N0	T1	YES			Alive	stage i
TCGA-S3-AA12-01A	82		MX	N1a	T3	NO			Alive	stage iiia
TCGA-E2-A150-01A	48		M0	N0	T2	YES			Alive	stage iia
TCGA-EW-A1PH-01A	52		M0	N1a	T1c	YES			Alive	stage iia
TCGA-D8-A1XA-01A	64		M0	N0	T1c	YES			Alive	stage ia
TCGA-AO-A12G-01A	75		M0	N0 (i+)	T2	NO			Alive	stage iia
TCGA-C8-A12W-01A	49		M0	N1	T4	NO			Alive	stage iiib
TCGA-AN-A03X-01A	74		M0	N0	T2	NO			Alive	stage iia
TCGA-E2-A158-01A	43		M0	N1mi	T1c	NO			Alive	stage iia
TCGA-E2-A158-11A	43		M0	N1mi	T1c	NO			Alive	stage iia
TCGA-E2-A152-01A	56		M0	N0	T1c	NO			Alive	stage i
TCGA-BH-A18S-01A	79		M0	N0	T1c			2009	Dead	stage i
TCGA-BH-A18S-11A	79		M0	N0	T1c			2009	Dead	stage i
TCGA-D8-A1JP-01A	73		M0	N0	T1c	NO			Alive	stage ia
TCGA-E9-A1ND-01A	75		M0	N1	T2	NO			Alive	stage iib
TCGA-E9-A1ND-11A	75		M0	N1	T2	NO			Alive	stage iib
TCGA-D8-A27L-01A	49		M0	N2a	T1c	NO			Alive	stage iiia
TCGA-UU-A93S-01A	63		M1	N3b	T4d			116	Dead	stage iv
TCGA-C8-A135-01A	64		M0	N1	T2	NO			Alive	stage iib
TCGA-BH-A201-01A	64		M0	N0	T1	YES			Alive	stage ia
TCGA-AC-A5XS-01A	74		MX	N0	T2	NO			Alive	stage iia
TCGA-AC-A5XS-11A	74		MX	N0	T2	NO			Alive	stage iia
TCGA-LL-A9Q3-01A	69		MX	N3a	T3	YES			Alive	stage iiic
TCGA-A2-A0CK-01A	60		M0	N2a	T3	YES			Alive	stage iiia
TCGA-A7-A26E-01A	71		MX	N1a	T3	YES			Alive	stage iiia
TCGA-JL-A3YX-01A	46		M0	N0	T2				Alive	stage iia
TCGA-EW-A3U0-01A	61		M0	N1a	T3	YES			Alive	stage iiia
TCGA-AR-A1AU-01A	39		M0	N2	T2	YES			Alive	stage iiia
TCGA-E2-A15T-01A	65		M0	N0	T2	NO			Alive	stage iia
TCGA-A1-A0SQ-01A	45		MX	N1	T2				Alive	stage iib
TCGA-AO-A03P-01A	54	1922	M0	N1	T2	YES		2911	Dead	stage iib
TCGA-E2-A14U-01A	74		M0	N0	T1c	NO			Alive	stage i
TCGA-BH-A0DK-01A	49		M0	N0 (i-)	T2	NO			Alive	stage iia
TCGA-BH-A0DK-11A	49		M0	N0 (i-)	T2	NO			Alive	stage iia
TCGA-AC-A3TN-01A	75		MX	N0	T3	YES			Alive	stage iib
TCGA-E9-A1N3-01A	70		M0	N2	T1c	NO			Alive	stage iiia
TCGA-BH-A1EY-01A	79		M0	N0	T2	NO		538	Dead	stage iia
TCGA-BH-A1EY-11B	79		M0	N0	T2	NO		538	Dead	stage iia
TCGA-BH-A18J-01A	56		M1	N2	T4b			612	Dead	stage iv
TCGA-BH-A18J-11A	56		M1	N2	T4b			612	Dead	stage iv
TCGA-A7-A0CE-01A	57		M0	N0 (i-)	T2	YES			Alive	stage iia
TCGA-A7-A0CE-11A	57		M0	N0 (i-)	T2	YES			Alive	stage iia
TCGA-AC-A23C-01A	62		MX	N1	T2	NO			Alive	stage iib
TCGA-XX-A89A-01A	68		MX	N0	T3	YES			Alive	stage iib
TCGA-A2-A0EV-01A	80		M0	N0 (i-)	T1c	NO			Alive	stage ia
TCGA-BH-A0HL-01A	56		M0	N1a	T2	NO			Alive	stage iib
TCGA-B6-A0WY-01A	40	2011	M0	N1b	T3	YES	YES	3461	Dead	stage iiia
TCGA-BH-A0BS-01A	55		M0	N1c	T3	YES			Alive	stage iiia
TCGA-BH-A0BS-11A	55		M0	N1c	T3	YES			Alive	stage iiia
TCGA-A7-A13H-01A	61		MX	N1a	T2	NO			Alive	stage iib
TCGA-BH-A0DG-01A	30		M0	N0	T2	YES			Alive	stage iia
TCGA-BH-A0DG-11A	30		M0	N0	T2	YES			Alive	stage iia
TCGA-AC-A3W6-01A	90		MX	N1	T3	NO			Alive	stage iiia
TCGA-D8-A1JT-01A	70		M0	N0	T2	NO			Alive	stage iia
TCGA-AN-A0FL-01A	62		M0	N0	T2	NO			Alive	stage iia
TCGA-PL-A8LZ-01A	29		M0	N2	T4b	NO			Alive	stage iiib
TCGA-AR-A0TZ-01A	43		M1	N2	T2	YES		3262	Dead	not reported
TCGA-AQ-A1H3-01A	49		MX	N3a	T2	YES			Alive	stage iiic
TCGA-E2-A15O-01A	89		M0	NX	T1c	NO			Alive	stage i
TCGA-UL-AAZ6-01A	73		MX	N0	T2	NO			Alive	stage iia
TCGA-C8-A134-01A	52		M0	N0	T2	NO			Alive	stage iia
TCGA-A2-A0SX-01A	48		M0	N0 (i-)	T1c	YES			Alive	stage ia
TCGA-BH-A1ES-01A	35		M0	N1a	T2			3462	Dead	stage iib
TCGA-BH-A1ES-06A	35		M0	N1a	T2			3462	Dead	stage iib
TCGA-BH-A1ES-11A	35		M0	N1a	T2			3462	Dead	stage iib
TCGA-BH-AB28-01A	53		M0	N1a	T3	NO			Alive	stage iiia
TCGA-BH-AB28-11A	53		M0	N1a	T3	NO			Alive	stage iiia
TCGA-A2-A0ER-01A	63		M0	N1mi	T1c	YES			Alive	stage ib
TCGA-A2-A0D4-01A	37		M0	N1a	T2	YES			Alive	stage iib
TCGA-PE-A5DC-01A	72		M0	N2a	T2			1430	Dead	stage iiia
TCGA-A8-A081-01A	80		M0	N0	T2				Alive	stage iia
TCGA-AR-A24H-01A	65		M0	N0	T2	YES			Alive	stage iia
TCGA-E2-A156-01A	61		M0	N0	T1c	YES			Alive	stage i
TCGA-AC-A2FK-01A	45		M0	N3a	T2	YES			Alive	stage iiic
TCGA-AC-A2FK-11A	45		M0	N3a	T2	YES			Alive	stage iiic
TCGA-AN-A0G0-01A	56		M0	N0	T2	YES			Alive	stage iia
TCGA-EW-A6S9-01A	34		M0	N1	T1c	NO			Alive	stage iia
TCGA-LL-A73Z-01A	55		M1	NX	T1c	YES		227	Dead	stage iv
TCGA-BH-A1EX-01A	67		M0	N1b	T2			1508	Dead	stage iib
TCGA-BH-A1EX-11A	67		M0	N1b	T2			1508	Dead	stage iib
TCGA-BH-A18Q-01A	56		M0	N1b	T2			1692	Dead	stage iib
TCGA-BH-A18Q-11A	56		M0	N1b	T2			1692	Dead	stage iib
TCGA-E9-A3HO-01A	49		M0	N0 (i-)	T2	NO			Alive	stage iia
TCGA-AR-A1AL-01A	60		M0	N1	T3	YES			Alive	stage iiia
TCGA-B6-A0IA-01A	51		M0	N0 (i-)	T2	NO			Alive	stage iia
TCGA-E2-A10C-01A	54		M0	N1a	T2	YES			Alive	stage iib
TCGA-A7-A5ZX-01A	48		M0	N3a	T2	YES			Alive	stage iiic
TCGA-A7-A5ZX-11A	48		M0	N3a	T2	YES			Alive	stage iiic
TCGA-AN-A0FJ-01A	59		M1	N2	T2	NO			Alive	stage iv
TCGA-LL-A5YO-01A	50		MX	N0	T1b	YES			Alive	stage ia
TCGA-E2-A1AZ-01A	63		M0	N1a	T2	YES			Alive	stage iib
TCGA-AN-A0XS-01A	63		M0	N2	T2	NO			Alive	stage iiia
TCGA-A8-A09R-01A	82		M0	N1	T2	YES			Alive	stage iib
TCGA-E2-A1B4-01A	74		M0	N2a	T1c	YES		1004	Dead	stage iiia
TCGA-AR-A24U-01A	47		M0	N1	T1	YES			Alive	stage iia
TCGA-5L-AAT1-01A	63		M1	N0	T2				Alive	stage iv
TCGA-B6-A40C-01A	51		M0	N0 (i-)	T3	YES			Alive	stage iib
TCGA-A7-A4SB-01A	56		M0	N1mi	T3	YES			Alive	stage iiia
TCGA-AN-A0XR-01A	55		M0	N2	T2	NO			Alive	stage iiia
TCGA-D8-A1J9-01A	48		M0	N0	T1c	NO			Alive	stage ia
TCGA-B6-A0WZ-01A	50		M0	N1b	T2	YES			Alive	stage ii
TCGA-AC-A4ZE-01A	63		M0	N0	T3	NO			Alive	stage iib
TCGA-A2-A0YC-01A	59	756	M0	N1mi	T2	YES	YES		Alive	stage iib
TCGA-B6-A400-01A	43		M0	N2a	T2	YES			Alive	stage iiia
TCGA-BH-A0B8-01A	64		M0	N0 (i-)	T1b	YES			Alive	stage i
TCGA-BH-A0B8-11A	64		M0	N0 (i-)	T1b	YES			Alive	stage i
TCGA-AN-A0AM-01A	56		M0	N0	T2	NO			Alive	stage iia
TCGA-A8-A06U-01A	80		M0	N1a	T2	NO		883	Dead	stage iib
TCGA-OL-A66P-01A	75		MX	N0	T2	NO			Alive	stage iia
TCGA-AC-A3W5-01A	65		MX	N0	T2	YES			Alive	stage iia
TCGA-AC-A5XU-01A	74		MX	N0 (i-)	T3	YES			Alive	stage iib
TCGA-LL-A5YP-01A	49		M0	N1a	T2	YES			Alive	stage iib
TCGA-A7-A426-01A	50		MX	N3a	T3	YES			Alive	stage iiic
TCGA-S3-AA0Z-01A	63		M0	N1a	T2	NO			Alive	stage iib
TCGA-B6-A409-01A	44		M0	N2a	T1c			573	Dead	stage iiia
TCGA-AC-A6NO-01A	43		MX	N1a	T2				Alive	stage iib
TCGA-BH-A6R8-01A	46		M0	N0	T2	YES			Alive	stage iia
TCGA-D8-A27T-01A	53		M0	N3a	T2	YES			Alive	stage iiic
TCGA-D8-A73W-01A	79		MX	N1a	T3	YES		385	Dead	stage iiia
TCGA-D8-A27H-01A	72		M0	N0	T2	NO			Alive	stage iia
TCGA-A2-A0YD-01A	63		M0	N0 (i+)	T3	NO			Alive	stage iib
TCGA-BH-A18L-01A	50		M0	N1mi	T3			811	Dead	stage iiia
TCGA-BH-A18L-11A	50		M0	N1mi	T3			811	Dead	stage iiia
TCGA-D8-A1JC-01A	59		M0	N2a	T2	YES			Alive	stage iiia
TCGA-E9-A1RB-01A	40		M0	N0	T2	NO		976	Dead	stage iia
TCGA-E9-A1RB-11A	40		M0	N0	T2	NO		976	Dead	stage iia
TCGA-B6-A2IU-01A	62		M0	N0	T2	YES			Alive	stage iia
TCGA-B6-A0X7-01A	62	1104	MX	NX	T1c	YES	NO	1781	Dead	stage x
TCGA-A8-A07G-01A	65		M0	N1a	T1c	YES			Alive	stage iia
TCGA-D8-A1XF-01A	45		M0	N0	T2	NO			Alive	stage iia
TCGA-C8-A137-01A	34		M0	N1	T2	NO			Alive	stage iib
TCGA-D8-A1JD-01A	41		M0	N1a	T2	YES			Alive	stage iib
TCGA-A8-A09Z-01A	83		M0	N0	T3				Alive	stage iib
TCGA-E2-A1IG-01A	45		M0	N1mi	T2	YES			Alive	stage iib
TCGA-E2-A1IG-11A	45		M0	N1mi	T2	YES			Alive	stage iib
TCGA-A8-A09T-01A	68		MX	N0	T1c	YES			Alive	not reported
TCGA-AC-A2BM-01A	41		MX	N1a	T2	NO			Alive	stage iib
TCGA-AC-A2BM-11A	41		MX	N1a	T2	NO			Alive	stage iib
TCGA-OL-A66L-01A	71		MX	N0	T1c	YES			Alive	stage ia
TCGA-A2-A0YF-01A	67		M0	N0 (i+)	T1b	NO			Alive	stage i
TCGA-D8-A1X6-01A	80		MX	N2a	T3	NO			Alive	stage iiia
TCGA-D8-A1XY-01A	74		MX	N0	T2	NO			Alive	stage iia
TCGA-A2-A0CQ-01A	62		M0	N0 (i-)	T1	YES			Alive	stage ia
TCGA-A8-A08X-01A	43		M0	N3a	T4d	YES			Alive	stage iiic
TCGA-C8-A12K-01A	80		M0	N1	T2				Alive	stage iib
TCGA-BH-A0BL-01A	35		M0	N0	T1c	NO			Alive	stage i
TCGA-BH-A0BL-11A	35		M0	N0	T1c	NO			Alive	stage i
TCGA-BH-A0H9-01A	69		M0	N0 (i-)	T2	YES			Alive	stage iia
TCGA-BH-A0H9-11A	69		M0	N0 (i-)	T2	YES			Alive	stage iia
TCGA-E9-A1NC-01A	61		M0	N1	T2	NO			Alive	stage iib
TCGA-A7-A0CJ-01A	57		M0	N0 (i-)	T2	YES			Alive	stage iia
TCGA-E9-A5UO-01A	41		M0	N0	T2	NO			Alive	stage iia
TCGA-A8-A09M-01A	75		M0	N3a	T2	YES			Alive	stage iiic
TCGA-E2-A1LL-01A	73	1303	MX	N2a	T3	YES	NO		Alive	stage iiia
TCGA-E2-A1LL-11A	73	1303	MX	N2a	T3	YES	NO		Alive	stage iiia
TCGA-A2-A0YH-01A	53		M0	N2a	T2	YES			Alive	stage iiia
TCGA-A2-A04X-01A	34		M0	N0 (i-)	T2	NO			Alive	stage iia
TCGA-A7-A4SC-01A	62		MX	N0	T3	YES			Alive	stage iib
TCGA-A7-A4SC-11A	62		MX	N0	T3	YES			Alive	stage iib
TCGA-AR-A0TY-01A	54	544	M0	N0	T2	NO		1699	Dead	stage iia
TCGA-EW-A1IZ-01A	53		MX	N2a	T2	YES			Alive	stage iiia
TCGA-A8-A06T-01A	75		M0	N1a	T3	NO			Alive	stage iiia
TCGA-E9-A5FK-01A	60		M0	N3	T2	YES			Alive	stage iiic
TCGA-B6-A0IO-01A	66		M0	N0 (i-)	T2	NO			Alive	stage iia
TCGA-BH-A204-01A	80		M0	N1b	T2			2534	Dead	stage iib
TCGA-BH-A204-11A	80		M0	N1b	T2			2534	Dead	stage iib
TCGA-BH-A0BT-01A	56		M0	N1mi	T1c	YES			Alive	stage iia
TCGA-BH-A0BT-11A	56		M0	N1mi	T1c	YES			Alive	stage iia
TCGA-AN-A0AK-01A	76		M0	N0	T2	NO			Alive	stage iia
TCGA-LD-A66U-01A	44		MX	N1mi	T2	YES			Alive	stage iib
TCGA-D8-A1X9-01A	66		M0	N1a	T2	YES			Alive	stage iib
TCGA-BH-A209-01A	77		M0	N0	T1c			3959	Dead	stage i
TCGA-BH-A209-11A	77		M0	N0	T1c			3959	Dead	stage i
TCGA-D8-A27F-01A	40		M0	N0	T2	YES			Alive	stage iia
TCGA-C8-A12L-01A	67		M0	N0 (i-)	T2	NO			Alive	stage iia
TCGA-LL-A50Y-01A	84		MX	N0	T2	NO			Alive	stage iia
TCGA-GM-A3XN-01A	44		M0	N2a	T1c	YES			Alive	stage iiia
TCGA-BH-A0E2-01A	49		M0	N2a	T2	NO			Alive	stage iiia
TCGA-AR-A24V-01A	52		M0	N1	T2	YES			Alive	stage iib
TCGA-EW-A424-01A	51		MX	N1	T3	YES			Alive	stage iiia
TCGA-EW-A1PG-01A	53		MX	N1a	T2	NO			Alive	stage iib
TCGA-A8-A07L-01A	58		M0	N1a	T3	YES			Alive	stage iiia
TCGA-AO-A12C-01A	42		M0	N1a	T2	YES			Alive	stage iib
TCGA-BH-A0HI-01A	78		M0	N0 (i-)	T1c	YES			Alive	stage ia
TCGA-A1-A0SF-01A	54		M0	N0	T2				Alive	stage iia
TCGA-PE-A5DD-01A	64		M0	N0	T2	YES			Alive	stage iia
TCGA-E2-A10B-01A	67	195	M0	N1a	T2	YES	YES		Alive	stage iib
TCGA-BH-A0E0-01A	38		M0	N3a	T3	YES			Alive	stage iiic
TCGA-BH-A0E0-11A	38		M0	N3a	T3	YES			Alive	stage iiic
