# Supplementary material for: Identification of key modules and genes associated with breast cancer prognosis using WGCNA and ceRNA network analysis
Source: Aging (Albany NY). 2020 Dec 9;13(2):2519–38. doi: 10.18632/aging.202285 (PMC7880379; doi:10.18632/aging.202285)
Supplement: Supplementary Table 5 [file aging-13-202285-s006.xlsx]

## Sheet: Brown module DERNAs
Supplementary Table 5. The differential genes in the co-expression Brown module.
gene symbol
DSCAM-AS1
CLEC3A
CST9
KCNJ3
CYP2B7P
RP11-428L9.2
CPB1
SLC25A24P1
RP11-473L15.3
C10orf82
LL22NC03-75H12.2
VSTM2A
PYDC1
RP11-53O19.2
NXPH1
BMPR1B-AS1
LRRC31
TFF1
SYT13
NBPF4
SLC30A8
RP11-527H14.4
CEACAM5
BMPR1B
DHRS2
NBPF6
AC092071.1
ABCC13
GP2
GRIA2
MS4A8
RIMS4
RNU6-813P
HNRNPA1P57
SYT9
IL20
NKAIN1
CTA-392E5.1
CEACAM6
MAPT-IT1
NAT1
RP11-498B4.5
CGA
EMX1
TNNT1
PGLYRP2
KRT41P
HS6ST3
PVALB
CST5
AP000439.3
PAX2
TPSG1
SLITRK6
WASF5P
ANKRD30B
RP11-53O19.1
RP11-459E5.1
PNLIPRP2
DIO1
WFDC6
TNNI3
TUBA3E
BPIFB1
CDH7
RP11-126H7.4
PAH
KCNH1-IT1
MYT1
ANKRD30BP1
RP3-443C4.2
LINC00238
EEF1A2
TPSP2
CTD-2033D15.3
CTC-490E21.13
TMPRSS6
LINC01411
SLC25A24P2
RP11-107I14.2
KISS1R
CXADRP3
PP14571
KRT31
U91319.1
MGC50722
F7
ADAMTS19
CTD-2589M5.4
NT5CP2
SYT1
CITF22-49D8.1
RP11-349I1.2
HOXB1
KRT37
TACC1P1
C19orf33
CYP2T1P
FSIP1
SYNPR-AS1
GRAMD4P7
MSMB
RP11-288G3.4
FAR2P3
CASC16
SERPINA9
NEURL1
CTA-392C11.1
IGFALS
CACNG1
KCNF1
TRH
RP11-616M22.12
OR4K12P
OTOR
LRG1
ADAMTS19-AS1
AL121578.2
CYP2A7
LINC01522
TFF3
RP11-148B18.3
AC061961.2
RP1-272L16.1
SPINK4
STMND1
AKR7A3
GHRH
RP11-379F12.4
SNTN
RET
RP11-93K22.6
SHISA9
CTB-49A3.4
VN1R48P
GATA3-AS1
SLC6A4
PYY
CTD-3023L14.2
SPTSSB
GRM4
TGM3
KCNH1
SERPINA12
GNG13
DUSP13
RP3-340B19.3
DOK7
ROBO2
CYP2T3P
SUSD3
SEZ6L
PRSS29P
ZNF725P
CCDC108
GSTA3
LA16c-312E8.4
STK19B
RP11-379F12.3
UNC5A
RP11-65J21.1
FAM196A
RP11-616M22.7
DNAJC12
CLGN
PLEKHD1
RIIAD1
RP11-686G23.2
LINC01344
AMH
CLDN25
CYP21A2
NELL2
CYP21A1P
RP11-36N20.1
RP11-638F5.2
RP11-557C9.3
CYP4F30P
RP11-12L8.1
CYP2B6
KCNK15
FAM135B
LGALS9B
RP4-781K5.4
AGR2
FMO9P
TMEM145
AC093642.1
TUBA3D
RP4-781K5.5
RP11-661P17.1
BCAS1
SLC7A13
RP11-486M23.2
AGR3
LINC00940
LINC00593
RP1-202O8.2
AC124944.5
RP11-166N6.1
CST9L
ENTPD8
GACAT2
RP11-150O12.3
RP11-210M15.1
C1orf167
RP11-166N6.3
CACNG4
TSPAN1
PRLH
FAM25A
RP3-453C12.15
CNTD2
AMZ1
RP11-91H12.1
MAPK15
RP4-530I15.6
EIF4E1B
CFB
AC106869.2
RP11-616M22.11
KCNE4
RP11-364P22.1
LINC01264
SBK2
RP11-345J13.1
SPACA4
RP11-503N18.4
FGFR3
CIB3
SLC16A6
GDF15
WI2-85898F10.1
CFAP99
CYP4F23P
RP5-862K6.4
2020-03-10
TRIM72
LRFN2
RP11-624L4.1
CCDC83
RP11-27M9.1
AC093642.3
FAM57B
C16orf92
CYP2A13
RP3-468B3.2
LGALS9C
ZMYND10
CCDC175
MED15P4
RP4-781K5.6
RP11-274H24.1
DEGS2
CYP4F62P
MALRD1
TGFBR3L
AC106900.6
AC018816.3
Z82214.3
RP11-326N17.2
CSTL1
RP11-611O2.2
RP11-265N7.1
CAPN9
SPEF1
CHCHD3P1
RP11-297L17.2
RAMP1
LKAAEAR1
RP11-607P23.1
CCDC78
RP5-1092A11.5
RP11-680B3.2
RP11-379K22.3
AC062028.1
RP11-503N18.1
RHBDL1
KRT8P2
RP11-304L19.12
TMEM82
RP11-166N6.2
CALY
CTD-2105E13.16
MISP
MYOG
PCAT29
LCN12
RP11-62C7.2
CPA6
DNAAF3
RP11-354P11.4
MUC1
RAB26
RP11-265N7.2
CACNA1H
AC234582.1
SPPL2C
ZDHHC22
KRT89P
MAPK8IP2
RP11-281P11.1
KRT8P22
FBXL16
PARD6B
AC068137.13
FGF7P1
S100G
FGD3
RP11-1157N2__B.2
HSH2D
SLC44A4
SMCR2
GPR139
POTEC
COX6C
RP11-1136G4.2
CRABP2
HPN
APOA1
RP11-436M15.1
TCEA1P3
ARNT2
TNFRSF18
AC009005.2
MIR4526
RP11-53B2.4
CTD-3023L14.1
LINC00595
HTR1E
CCDC151
RP11-483I13.2
TUBA3C
SNX19P1
CLRN1
RNA5SP299
RP11-557C9.1
LRRC46
METRN
PEX5L
CTD-3001H11.2
SSTR2
AGAP1-IT1
CLRN1-AS1
RP11-462P6.1
SRMS
DNASE1L2
KRTAP3-1
PRR15
RP11-379K22.2
FOXH1
HAGHL
HPYR1
KRT18P68
RP5-1170K4.7
RP3-395M20.12
RP5-1002M8.4
CALHM1
KRT18P55
GS1-393G12.14
RP4-697K14.15
KRT18P8
AC073325.1
STARD10
RP11-19J5.2
RP11-354P11.2
LRRC73
LINC00176
AC005301.8
ZG16B
RP11-31I22.3
GPRC5A
MIR149
RP11-428L9.1
CYSRT1
CITF22-24E5.1
LGALS8-AS1
RP1-63M2.7
MIR5691
SMIM22
CREB3L1
AL050303.10
KIFC2
NBPF22P
AC098592.6
C9orf116
PRR36
RP11-527H14.6
VSTM2A-OT1
RP11-312A15.2
RP11-416N2.3
KRT35
RP11-127I20.5
NBPF5P
PTK6
AC005150.1
RHPN1
BCAS4
RP11-358L22.2
AC018804.3
AC012594.1
RP11-312A15.3
MTL5
RP11-19J5.1
RP11-373I8.1
RP11-571O6.2
C9orf172
LRRC24
SLC22A24
RP3-333B15.5
RP11-16L9.2
OR4K11P
RP11-301G7.1
KIAA1024L
NATP
RP11-466M21.1
RP11-432M8.17
RP11-91H12.4
GNG3
AC002383.2
RP11-16O13.1
NDP-AS1
RP1-137K24.1
TPRN
KLF2P3
RP11-654G14.1
RP11-503D12.1
RP3-326I13.1
AL354984.2
MKNK2P1
LINC01022
HYPM
AC011899.10
RP11-486M23.3
KCNK16
AC007405.8
LONRF2P1
RP11-775G23.1
RP11-281J9.2
KLHL1
RP11-322I2.1
PGBD4P8
MROH4P
AP006564.1
AP001465.5
OR4K7P
RP11-88E18.1
AC079233.1
RP11-351O2.2
OR4K8P
ATXN8OS
GTF3AP6
RNU6-848P
