# Supplementary material for: Identification of key modules and genes associated with breast cancer prognosis using WGCNA and ceRNA network analysis
Source: Aging (Albany NY). 2020 Dec 9;13(2):2519–38. doi: 10.18632/aging.202285 (PMC7880379; doi:10.18632/aging.202285)
Supplement: Supplementary Table 6 [file aging-13-202285-s007.xlsx]

## Sheet: Brown module GO
#Term	Database	ID	Input number	Background number	P-Value	Corrected P-Value	Input	Hyperlink
somatodendritic compartment	Gene Ontology	GO:0036477	6	125	3.28702e-05	0.00965887	KCNH1|UNC5A|GNG13|BMPR1B|GNG3|MAPK8IP2	http://amigo.geneontology.org/amigo/term/GO:0036477
integral component of plasma membrane	Gene Ontology	GO:0005887	8	258	3.40301e-05	0.00965887	KCNJ3|CALHM1|KCNK16|SLC7A13|TPSG1|TSPAN1|GRM4|SHISA9	http://amigo.geneontology.org/amigo/term/GO:0005887
plasma membrane	Gene Ontology	GO:0005886	13	726	4.14048e-05	0.00965887	SLITRK6|SERPINA12|KCNK15|RAB26|F7|UNC5A|PARD6B|CLDN25|NEURL1|GNG3|CEACAM6|GP2|CLRN1	http://amigo.geneontology.org/amigo/term/GO:0005886
extracellular region	Gene Ontology	GO:0005576	13	736	4.74432e-05	0.00965887	PYY|SLC44A4|METRN|VSTM2A|MUC1|CPA6|TFF3|PGLYRP2|HPN|CEACAM6|PVALB|SPINK4|DNASE1L2	http://amigo.geneontology.org/amigo/term/GO:0005576
membrane	Gene Ontology	GO:0016020	19	1443	4.9443e-05	0.00965887	SPACA4|KCNJ3|KCNH1|GRIA2|KCNK15|CYP2B6|SPTSSB|CCDC78|GNG13|C16orf92|CYP2A7|DIO1|RIMS4|HTR1E|ZDHHC22|MISP|APOA1|GP2|GNG3	http://amigo.geneontology.org/amigo/term/GO:0016020
regulation of trans-synaptic signaling	Gene Ontology	GO:0099177	4	51	0.000119857	0.0156339	RIMS4|GRM4|SHISA9|SLC6A4	http://amigo.geneontology.org/amigo/term/GO:0099177
cell periphery	Gene Ontology	GO:0071944	13	812	0.000124168	0.0156339	SPACA4|SLC44A4|KCNE4|GRIA2|ROBO2|CFB|RET|ENTPD8|NEURL1|TPSG1|DIO1|CEACAM6|CLRN1	http://amigo.geneontology.org/amigo/term/GO:0071944
cellular anatomical entity	Gene Ontology	GO:0110165	28	2864	0.000156399	0.0175911	MTL5|GSTA3|TNNT1|AMH|CDH7|NEURL1|CEACAM5|CEACAM6|PVALB|NAT1|NKAIN1|CLRN1|KISS1R|METRN|TPRN|DNASE1L2|UNC5A|RAMP1|CLDN25|HPN|AKR7A3|CALY|SYT1|CFB|COX6C|CACNG1|MYT1|CACNG4	http://amigo.geneontology.org/amigo/term/GO:0110165
extracellular vesicle	Gene Ontology	GO:1903561	10	514	0.000166596	0.0175911	DHRS2|KRT35|KRT37|TFF3|PGLYRP2|GSTA3|AKR7A3|GPRC5A|GP2|CST5	http://amigo.geneontology.org/amigo/term/GO:1903561
intrinsic component of membrane	Gene Ontology	GO:0031224	13	843	0.000177816	0.0175911	CACNA1H|KISS1R|RAB26|SYT1|SPTSSB|ENTPD8|CREB3L1|KIAA1024L|SLC30A8|CACNG1|SLC22A24|SHISA9|HPN	http://amigo.geneontology.org/amigo/term/GO:0031224
cation transmembrane transporter activity	Gene Ontology	GO:0008324	5	120	0.00028451	0.0222375	CACNA1H|SLC44A4|COX6C|MAPK8IP2|SLC6A4	http://amigo.geneontology.org/amigo/term/GO:0008324
receptor regulator activity	Gene Ontology	GO:0030545	4	65	0.000289007	0.0222375	IL20|GDF15|APOA1|PRLH	http://amigo.geneontology.org/amigo/term/GO:0030545
binding	Gene Ontology	GO:0005488	23	2247	0.000329283	0.024003	GHRH|TRIM72|CFB|EEF1A2|TFF1|BPIFB1|TGM3|MYOG|CACNA1H|AMH|AMZ1|CIB3|MSMB|CEACAM6|MYT1|CALHM1|KCNK16|DNASE1L2|TSPAN1|RHPN1|SYT1|AGR2|CCDC151	http://amigo.geneontology.org/amigo/term/GO:0005488
steroid hydroxylase activity	Gene Ontology	GO:0008395	2	5	0.000428208	0.0296534	CYP2A7|CYP2B6	http://amigo.geneontology.org/amigo/term/GO:0008395
positive regulation of ERBB signaling pathway	Gene Ontology	GO:1901186	2	7	0.000729659	0.0404173	NEURL1|AGR2	http://amigo.geneontology.org/amigo/term/GO:1901186
cellular process	Gene Ontology	GO:0009987	26	2852	0.000758637	0.0404173	STARD10|GRIA2|EEF1A2|TFF1|HS6ST3|MAPK15|MYOG|PNLIPRP2|TUBA3E|CYP2B6|NEURL1|FAM135B|CST5|UNC5A|CCDC151|CYP2A7|KLHL1|NELL2|KIFC2|DUSP13|SYT9|LRFN2|RHBDL1|CSTL1|EIF4E1B|SPPL2C	http://amigo.geneontology.org/amigo/term/GO:0009987
inorganic cation transmembrane transport	Gene Ontology	GO:0098662	5	150	0.000758737	0.0404173	KCNK16|CACNG4|KCNK15|KCNH1|TNNI3	http://amigo.geneontology.org/amigo/term/GO:0098662
ceramide biosynthetic process	Gene Ontology	GO:0046513	2	9	0.00110806	0.0548095	FAM57B|DEGS2	http://amigo.geneontology.org/amigo/term/GO:0046513
serine hydrolase activity	Gene Ontology	GO:0017171	3	43	0.0012297	0.0556383	SERPINA9|SPINK4|HPN	http://amigo.geneontology.org/amigo/term/GO:0017171
regulation of stress fiber assembly	Gene Ontology	GO:0051492	2	10	0.00132568	0.0556383	KISS1R|APOA1	http://amigo.geneontology.org/amigo/term/GO:0051492
mating	Gene Ontology	GO:0007618	2	10	0.00132568	0.0556383	MAPK8IP2|SLC6A4	http://amigo.geneontology.org/amigo/term/GO:0007618
exocytic vesicle membrane	Gene Ontology	GO:0099501	2	10	0.00132568	0.0556383	SYT9|SYT1	http://amigo.geneontology.org/amigo/term/GO:0099501
channel activity	Gene Ontology	GO:0015267	4	102	0.00145604	0.0593122	GRIA2|CACNA1H|MAPK8IP2|KCNF1	http://amigo.geneontology.org/amigo/term/GO:0015267
receptor complex	Gene Ontology	GO:0043235	3	47	0.00156661	0.0619929	GRIA2|CACNG4|SHISA9	http://amigo.geneontology.org/amigo/term/GO:0043235
regulation of growth	Gene Ontology	GO:0040008	4	111	0.00196273	0.0738292	NELL2|SLC44A4|HPN|SLC6A4	http://amigo.geneontology.org/amigo/term/GO:0040008
extracellular space	Gene Ontology	GO:0005615	9	596	0.00199831	0.0738292	AMH|SLC44A4|DHRS2|RAMP1|KRT37|GSTA3|PAH|PVALB|LRG1	http://amigo.geneontology.org/amigo/term/GO:0005615
secretory granule	Gene Ontology	GO:0030141	3	53	0.00217156	0.0771181	SYT1|APOA1|SLC30A8	http://amigo.geneontology.org/amigo/term/GO:0030141
transmembrane receptor protein tyrosine kinase activity	Gene Ontology	GO:0004714	2	14	0.0023815	0.0773379	GPRC5A|RET	http://amigo.geneontology.org/amigo/term/GO:0004714
cochlea morphogenesis	Gene Ontology	GO:0090103	2	14	0.0023815	0.0773379	HPN|PAX2	http://amigo.geneontology.org/amigo/term/GO:0090103
tissue homeostasis	Gene Ontology	GO:0001894	3	55	0.00240111	0.0773379	PRLH|ZG16B|CLRN1	http://amigo.geneontology.org/amigo/term/GO:0001894
side of membrane	Gene Ontology	GO:0098552	3	57	0.00264513	0.0828211	SPPL2C|CEACAM5|GNG3	http://amigo.geneontology.org/amigo/term/GO:0098552
regulation of protein tyrosine kinase activity	Gene Ontology	GO:0061097	2	15	0.00269094	0.0828211	GPRC5A|DOK7	http://amigo.geneontology.org/amigo/term/GO:0061097
anion transmembrane transport	Gene Ontology	GO:0098656	3	59	0.00290392	0.0874333	SLC6A4|SLC22A24|SLC16A6	http://amigo.geneontology.org/amigo/term/GO:0098656
ciliary plasm	Gene Ontology	GO:0097014	2	16	0.00301823	0.0876863	SPEF1|CCDC151	http://amigo.geneontology.org/amigo/term/GO:0097014
response to peptide hormone	Gene Ontology	GO:0043434	3	60	0.00303895	0.0876863	CYP21A2|PRLH|GNG3	http://amigo.geneontology.org/amigo/term/GO:0043434
cis-regulatory region sequence-specific DNA binding	Gene Ontology	GO:0000987	3	62	0.00332042	0.0938527	MUC1|CREB3L1|PAX2	http://amigo.geneontology.org/amigo/term/GO:0000987
extrinsic component of cytoplasmic side of plasma membrane	Gene Ontology	GO:0031234	2	18	0.00372569	0.100458	SRMS|PTK6	http://amigo.geneontology.org/amigo/term/GO:0031234
neuron projection terminus	Gene Ontology	GO:0044306	2	19	0.00410553	0.10383	PVALB|GHRH	http://amigo.geneontology.org/amigo/term/GO:0044306
protein localization to cell periphery	Gene Ontology	GO:1990778	2	19	0.00410553	0.10383	RAMP1|RAB26	http://amigo.geneontology.org/amigo/term/GO:1990778
vesicle	Gene Ontology	GO:0031982	9	667	0.00414379	0.10383	SLC6A4|KRT31|F7|KRT37|RET|GDF15|ZG16B|FGFR3|BCAS1	http://amigo.geneontology.org/amigo/term/GO:0031982
cytoplasm	Gene Ontology	GO:0005737	16	1641	0.00419817	0.10383	TNNT1|CALY|RAB26|F7|GRIA2|PEX5L|NAT1|HSH2D|TFF3|SRMS|ARNT2|SPPL2C|EMX1|KIFC2|FGFR3|DUSP13	http://amigo.geneontology.org/amigo/term/GO:0005737
endopeptidase activity	Gene Ontology	GO:0004175	4	139	0.0042951	0.104363	CLGN|CST5|TMPRSS6|WFDC6	http://amigo.geneontology.org/amigo/term/GO:0004175
enzyme binding	Gene Ontology	GO:0019899	6	330	0.00464827	0.110998	FGD3|SLC6A4|NKAIN1|NELL2|FGFR3|MAPK8IP2	http://amigo.geneontology.org/amigo/term/GO:0019899
response to estradiol	Gene Ontology	GO:0032355	2	21	0.00491661	0.115415	MYOG|SLC6A4	http://amigo.geneontology.org/amigo/term/GO:0032355
peptidase activity, acting on L-amino acid peptides	Gene Ontology	GO:0070011	4	148	0.00532514	0.120907	CLGN|SPINK4|CPB1|CST5	http://amigo.geneontology.org/amigo/term/GO:0070011
peptide receptor activity	Gene Ontology	GO:0001653	2	23	0.00579514	0.1262	SSTR2|RAMP1	http://amigo.geneontology.org/amigo/term/GO:0001653
inorganic molecular entity transmembrane transporter activity	Gene Ontology	GO:0015318	4	152	0.00583162	0.1262	CACNA1H|CACNG1|KCNK16|SLC16A6	http://amigo.geneontology.org/amigo/term/GO:0015318
cell body	Gene Ontology	GO:0044297	3	77	0.00594089	0.126587	UNC5A|KCNH1|SEZ6L	http://amigo.geneontology.org/amigo/term/GO:0044297
negative regulation of protein metabolic process	Gene Ontology	GO:0051248	4	158	0.00664992	0.138937	SERPINA12|CSTL1|SPINK4|PTK6	http://amigo.geneontology.org/amigo/term/GO:0051248
hydrolase activity	Gene Ontology	GO:0016787	8	593	0.00672116	0.138937	PNLIPRP2|RHBDL1|CLGN|PAX2|SPPL2C|FGFR3|FAM135B|CST5	http://amigo.geneontology.org/amigo/term/GO:0016787
monooxygenase activity	Gene Ontology	GO:0004497	2	26	0.0072366	0.146162	PAH|CYP2B6	http://amigo.geneontology.org/amigo/term/GO:0004497
protein metabolic process	Gene Ontology	GO:0019538	11	1003	0.00733021	0.146162	F7|TMPRSS6|MUC1|PAX2|CFB|PYDC1|RHBDL1|HPN|EIF4E1B|EEF1A2|DOK7	http://amigo.geneontology.org/amigo/term/GO:0019538
ion transmembrane transporter activity	Gene Ontology	GO:0015075	4	163	0.00738724	0.146162	CACNA1H|TNNI3|MAPK8IP2|SLC22A24	http://amigo.geneontology.org/amigo/term/GO:0015075
intracellular vesicle	Gene Ontology	GO:0097708	5	261	0.0077362	0.15091	SYT1|SPPL2C|TRIM72|RAB26|FGFR3	http://amigo.geneontology.org/amigo/term/GO:0097708
cation transmembrane transport	Gene Ontology	GO:0098655	4	167	0.00801443	0.154166	KCNK16|MAPK8IP2|KCNF1|COX6C	http://amigo.geneontology.org/amigo/term/GO:0098655
endopeptidase inhibitor activity	Gene Ontology	GO:0004866	2	28	0.00827817	0.157058	SPINK4|WFDC6	http://amigo.geneontology.org/amigo/term/GO:0004866
proteolysis	Gene Ontology	GO:0006508	6	378	0.00871225	0.160886	SERPINA12|TRIM72|RET|TPSG1|CST9|ADAMTS19	http://amigo.geneontology.org/amigo/term/GO:0006508
GTPase binding	Gene Ontology	GO:0051020	3	92	0.00952204	0.169077	FGD3|FGFR3|RET	http://amigo.geneontology.org/amigo/term/GO:0051020
protein binding	Gene Ontology	GO:0005515	15	1688	0.012103	0.201552	TNNT1|AMH|FGD3|KRT31|SYT1|DHRS2|TFF1|RET|KCNJ3|PRLH|ZMYND10|CACNG1|NXPH1|FGFR3|NKAIN1	http://amigo.geneontology.org/amigo/term/GO:0005515
regulation of cellular metabolic process	Gene Ontology	GO:0031323	12	1229	0.0122565	0.201552	EEF1A2|HOXB1|EMX1|CREB3L1|MAPK8IP2|EIF4E1B|GRM4|DOK7|MYOG|APOA1|PAX2|GNG3	http://amigo.geneontology.org/amigo/term/GO:0031323
transmembrane transporter activity	Gene Ontology	GO:0022857	4	193	0.0129493	0.204208	GRIA2|SLC44A4|CACNG4|SLC6A4	http://amigo.geneontology.org/amigo/term/GO:0022857
peptidase regulator activity	Gene Ontology	GO:0061134	2	36	0.0130626	0.204208	CST9|WFDC6	http://amigo.geneontology.org/amigo/term/GO:0061134
trans-synaptic signaling	Gene Ontology	GO:0099537	3	104	0.0131224	0.204208	GRM4|HTR1E|SYT13	http://amigo.geneontology.org/amigo/term/GO:0099537
molecular function regulator	Gene Ontology	GO:0098772	5	307	0.0146211	0.225003	SERPINA9|CSTL1|GDF15|MAPK8IP2|CST5	http://amigo.geneontology.org/amigo/term/GO:0098772
identical protein binding	Gene Ontology	GO:0042802	4	202	0.0150241	0.227336	SYT9|CEACAM5|CALHM1|SYT1	http://amigo.geneontology.org/amigo/term/GO:0042802
extrinsic component of membrane	Gene Ontology	GO:0019898	2	39	0.015101	0.227336	TGM3|GNG13	http://amigo.geneontology.org/amigo/term/GO:0019898
voltage-gated channel activity	Gene Ontology	GO:0022832	2	40	0.015809	0.235434	KCNK16|CALHM1	http://amigo.geneontology.org/amigo/term/GO:0022832
serine-type endopeptidase activity	Gene Ontology	GO:0004252	2	42	0.0172666	0.246539	CFB|WFDC6	http://amigo.geneontology.org/amigo/term/GO:0004252
positive regulation of lipase activity	Gene Ontology	GO:0060193	2	42	0.0172666	0.246539	APOA1|FGFR3	http://amigo.geneontology.org/amigo/term/GO:0060193
extracellular exosome	Gene Ontology	GO:0070062	6	445	0.0179503	0.252043	TGM3|BPIFB1|TSPAN1|CYSRT1|GP2|BCAS1	http://amigo.geneontology.org/amigo/term/GO:0070062
molecular adaptor activity	Gene Ontology	GO:0060090	2	43	0.0180161	0.252043	HSH2D|MAPK8IP2	http://amigo.geneontology.org/amigo/term/GO:0060090
regulation of secretion by cell	Gene Ontology	GO:1903530	3	120	0.0189778	0.262843	RIMS4|SLC30A8|PYDC1	http://amigo.geneontology.org/amigo/term/GO:1903530
G protein-coupled receptor binding	Gene Ontology	GO:0001664	2	46	0.0203453	0.276257	PRLH|RAMP1	http://amigo.geneontology.org/amigo/term/GO:0001664
apical plasma membrane	Gene Ontology	GO:0016324	2	46	0.0203453	0.276257	MUC1|HPN	http://amigo.geneontology.org/amigo/term/GO:0016324
positive regulation of neuron projection development	Gene Ontology	GO:0010976	2	48	0.021964	0.277696	CRABP2|METRN	http://amigo.geneontology.org/amigo/term/GO:0010976
serine-type peptidase activity	Gene Ontology	GO:0008236	2	51	0.0244885	0.277696	TMPRSS6|WFDC6	http://amigo.geneontology.org/amigo/term/GO:0008236
presynapse	Gene Ontology	GO:0098793	2	51	0.0244885	0.277696	RIMS4|SYT9	http://amigo.geneontology.org/amigo/term/GO:0098793
transport vesicle	Gene Ontology	GO:0030133	2	51	0.0244885	0.277696	CGA|RAB26	http://amigo.geneontology.org/amigo/term/GO:0030133
glycerophospholipid biosynthetic process	Gene Ontology	GO:0046474	2	53	0.0262341	0.277696	SLC44A4|FGFR3	http://amigo.geneontology.org/amigo/term/GO:0046474
regulation of cellular amide metabolic process	Gene Ontology	GO:0034248	2	53	0.0262341	0.277696	NAT1|EIF4E1B	http://amigo.geneontology.org/amigo/term/GO:0034248
catalytic activity, acting on a protein	Gene Ontology	GO:0140096	6	488	0.026541	0.277696	F7|SERPINA9|MAPK15|DUSP13|MAPK8IP2|WFDC6	http://amigo.geneontology.org/amigo/term/GO:0140096
ammonium transmembrane transport	Gene Ontology	GO:0072488	1	5	0.0270431	0.277696	SLC6A4	http://amigo.geneontology.org/amigo/term/GO:0072488
centriolar satellite	Gene Ontology	GO:0034451	1	5	0.0270431	0.277696	ZMYND10	http://amigo.geneontology.org/amigo/term/GO:0034451
syntaxin-1 binding	Gene Ontology	GO:0017075	1	5	0.0270431	0.277696	SYT1	http://amigo.geneontology.org/amigo/term/GO:0017075
isoprenoid binding	Gene Ontology	GO:0019840	1	5	0.0270431	0.277696	LCN12	http://amigo.geneontology.org/amigo/term/GO:0019840
oxidoreductase activity, acting on paired donors, with incorporation or reduction of molecular oxygen, reduced flavin or flavoprotein as one donor, and incorporation of one atom of oxygen	Gene Ontology	GO:0016712	1	5	0.0270431	0.277696	CYP2B6	http://amigo.geneontology.org/amigo/term/GO:0016712
aldosterone metabolic process	Gene Ontology	GO:0032341	1	5	0.0270431	0.277696	CACNA1H	http://amigo.geneontology.org/amigo/term/GO:0032341
heparan sulfate sulfotransferase activity	Gene Ontology	GO:0034483	1	5	0.0270431	0.277696	HS6ST3	http://amigo.geneontology.org/amigo/term/GO:0034483
cell proliferation in external granule layer	Gene Ontology	GO:0021924	1	5	0.0270431	0.277696	SLC6A4	http://amigo.geneontology.org/amigo/term/GO:0021924
S-acyltransferase activity	Gene Ontology	GO:0016417	1	5	0.0270431	0.277696	ZDHHC22	http://amigo.geneontology.org/amigo/term/GO:0016417
secondary alcohol biosynthetic process	Gene Ontology	GO:1902653	1	5	0.0270431	0.277696	APOA1	http://amigo.geneontology.org/amigo/term/GO:1902653
negative regulation of cytokine secretion involved in immune response	Gene Ontology	GO:0002740	1	5	0.0270431	0.277696	APOA1	http://amigo.geneontology.org/amigo/term/GO:0002740
regulation of histone H4 acetylation	Gene Ontology	GO:0090239	1	5	0.0270431	0.277696	MUC1	http://amigo.geneontology.org/amigo/term/GO:0090239
chondrocyte development	Gene Ontology	GO:0002063	1	5	0.0270431	0.277696	BMPR1B	http://amigo.geneontology.org/amigo/term/GO:0002063
regulation of protein kinase C signaling	Gene Ontology	GO:0090036	1	5	0.0270431	0.277696	SEZ6L	http://amigo.geneontology.org/amigo/term/GO:0090036
enzyme inhibitor activity	Gene Ontology	GO:0004857	2	54	0.0271253	0.277696	CST9L|APOA1	http://amigo.geneontology.org/amigo/term/GO:0004857
response to insulin	Gene Ontology	GO:0032868	2	54	0.0271253	0.277696	SERPINA12|PRLH	http://amigo.geneontology.org/amigo/term/GO:0032868
supramolecular fiber organization	Gene Ontology	GO:0097435	3	139	0.0275237	0.277696	KISS1R|PYDC1|CLRN1	http://amigo.geneontology.org/amigo/term/GO:0097435
DNA-binding transcription factor binding	Gene Ontology	GO:0140297	2	56	0.0289439	0.277696	FOXH1|ARNT2	http://amigo.geneontology.org/amigo/term/GO:0140297
cellular response to tumor necrosis factor	Gene Ontology	GO:0071356	2	56	0.0289439	0.277696	APOA1|TNFRSF18	http://amigo.geneontology.org/amigo/term/GO:0071356
intracellular	Gene Ontology	GO:0005622	17	2228	0.0293324	0.277696	SPACA4|MALRD1|FGD3|CRABP2|PGLYRP2|PEX5L|EEF1A2|HOXB1|KRT35|TMPRSS6|MAPK15|TSPAN1|GRM4|ZDHHC22|MYT1|CAPN9|MISP	http://amigo.geneontology.org/amigo/term/GO:0005622
organonitrogen compound metabolic process	Gene Ontology	GO:1901564	15	1894	0.029855	0.277696	SERPINA12|DEGS2|KCNH1|MUC1|BMPR1B|CPB1|CLGN|SRMS|DIO1|HS6ST3|GRM4|ZDHHC22|SPINK4|EEF1A2|DUSP13	http://amigo.geneontology.org/amigo/term/GO:1901564
ear development	Gene Ontology	GO:0043583	2	58	0.0308098	0.277696	SLITRK6|HPN	http://amigo.geneontology.org/amigo/term/GO:0043583
positive regulation of telomere maintenance via telomere lengthening	Gene Ontology	GO:1904358	1	6	0.0314789	0.277696	MAPK15	http://amigo.geneontology.org/amigo/term/GO:1904358
AMPA glutamate receptor complex	Gene Ontology	GO:0032281	1	6	0.0314789	0.277696	GRIA2	http://amigo.geneontology.org/amigo/term/GO:0032281
phospholipid transporter activity	Gene Ontology	GO:0005548	1	6	0.0314789	0.277696	APOA1	http://amigo.geneontology.org/amigo/term/GO:0005548
positive regulation of axonogenesis	Gene Ontology	GO:0050772	1	6	0.0314789	0.277696	CRABP2	http://amigo.geneontology.org/amigo/term/GO:0050772
cellular response to estradiol stimulus	Gene Ontology	GO:0071392	1	6	0.0314789	0.277696	MYOG	http://amigo.geneontology.org/amigo/term/GO:0071392
negative regulation of response to endoplasmic reticulum stress	Gene Ontology	GO:1903573	1	6	0.0314789	0.277696	CREB3L1	http://amigo.geneontology.org/amigo/term/GO:1903573
regulation of intrinsic apoptotic signaling pathway in response to DNA damage by p53 class mediator	Gene Ontology	GO:1902165	1	6	0.0314789	0.277696	MUC1	http://amigo.geneontology.org/amigo/term/GO:1902165
renal vesicle morphogenesis	Gene Ontology	GO:0072077	1	6	0.0314789	0.277696	PAX2	http://amigo.geneontology.org/amigo/term/GO:0072077
ureter development	Gene Ontology	GO:0072189	1	6	0.0314789	0.277696	RET	http://amigo.geneontology.org/amigo/term/GO:0072189
cell aggregation	Gene Ontology	GO:0098743	1	6	0.0314789	0.277696	OTOR	http://amigo.geneontology.org/amigo/term/GO:0098743
presynaptic active zone	Gene Ontology	GO:0048786	1	6	0.0314789	0.277696	RIMS4	http://amigo.geneontology.org/amigo/term/GO:0048786
organelle localization by membrane tethering	Gene Ontology	GO:0140056	1	6	0.0314789	0.277696	SYT1	http://amigo.geneontology.org/amigo/term/GO:0140056
excitatory extracellular ligand-gated ion channel activity	Gene Ontology	GO:0005231	1	6	0.0314789	0.277696	GRIA2	http://amigo.geneontology.org/amigo/term/GO:0005231
nucleotide transport	Gene Ontology	GO:0006862	1	6	0.0314789	0.277696	CALHM1	http://amigo.geneontology.org/amigo/term/GO:0006862
negative regulation of catecholamine secretion	Gene Ontology	GO:0033604	1	6	0.0314789	0.277696	CGA	http://amigo.geneontology.org/amigo/term/GO:0033604
response to thyroid hormone	Gene Ontology	GO:0097066	1	6	0.0314789	0.277696	HPN	http://amigo.geneontology.org/amigo/term/GO:0097066
response to potassium ion	Gene Ontology	GO:0035864	1	6	0.0314789	0.277696	CACNA1H	http://amigo.geneontology.org/amigo/term/GO:0035864
lung epithelial cell differentiation	Gene Ontology	GO:0060487	1	6	0.0314789	0.277696	AGR2	http://amigo.geneontology.org/amigo/term/GO:0060487
triglyceride lipase activity	Gene Ontology	GO:0004806	1	6	0.0314789	0.277696	APOA1	http://amigo.geneontology.org/amigo/term/GO:0004806
regulation of gamma-aminobutyric acid secretion	Gene Ontology	GO:0014052	1	6	0.0314789	0.277696	TRH	http://amigo.geneontology.org/amigo/term/GO:0014052
T-tubule	Gene Ontology	GO:0030315	1	6	0.0314789	0.277696	KCNJ3	http://amigo.geneontology.org/amigo/term/GO:0030315
gated channel activity	Gene Ontology	GO:0022836	2	59	0.0317602	0.278404	GRIA2|CALHM1	http://amigo.geneontology.org/amigo/term/GO:0022836
organelle	Gene Ontology	GO:0043226	16	2086	0.0325742	0.282154	CALY|F7|KRT31|DHRS2|DNASE1L2|KRT35|TFF3|TSPAN1|GDF15|PVALB|LRG1|EMX1|MYOG|SEZ6L|ZG16B|CST5	http://amigo.geneontology.org/amigo/term/GO:0043226
mesonephric epithelium development	Gene Ontology	GO:0072163	2	61	0.0336953	0.282154	ROBO2|PAX2	http://amigo.geneontology.org/amigo/term/GO:0072163
cellular component organization or biogenesis	Gene Ontology	GO:0071840	13	1594	0.0340953	0.282154	SYT13|CRABP2|MAPK15|KRT31|SYT1|PTK6|EMX1|NEURL1|CREB3L1|LRFN2|HPN|PAX2|CDH7	http://amigo.geneontology.org/amigo/term/GO:0071840
developmental growth	Gene Ontology	GO:0048589	3	154	0.0354897	0.282154	SLITRK6|BMPR1B|EMX1	http://amigo.geneontology.org/amigo/term/GO:0048589
negative regulation of protein phosphorylation	Gene Ontology	GO:0001933	2	63	0.0356753	0.282154	GPRC5A|PTK6	http://amigo.geneontology.org/amigo/term/GO:0001933
negative chemotaxis	Gene Ontology	GO:0050919	1	7	0.0358946	0.282154	ROBO2	http://amigo.geneontology.org/amigo/term/GO:0050919
regulation of endoplasmic reticulum stress-induced intrinsic apoptotic signaling pathway	Gene Ontology	GO:1902235	1	7	0.0358946	0.282154	CREB3L1	http://amigo.geneontology.org/amigo/term/GO:1902235
cartilage condensation	Gene Ontology	GO:0001502	1	7	0.0358946	0.282154	BMPR1B	http://amigo.geneontology.org/amigo/term/GO:0001502
brain morphogenesis	Gene Ontology	GO:0048854	1	7	0.0358946	0.282154	EMX1	http://amigo.geneontology.org/amigo/term/GO:0048854
negative regulation of toll-like receptor 4 signaling pathway	Gene Ontology	GO:0034144	1	7	0.0358946	0.282154	BPIFB1	http://amigo.geneontology.org/amigo/term/GO:0034144
retinal ganglion cell axon guidance	Gene Ontology	GO:0031290	1	7	0.0358946	0.282154	BMPR1B	http://amigo.geneontology.org/amigo/term/GO:0031290
cellular response to lithium ion	Gene Ontology	GO:0071285	1	7	0.0358946	0.282154	MYOG	http://amigo.geneontology.org/amigo/term/GO:0071285
steroid hormone biosynthetic process	Gene Ontology	GO:0120178	1	7	0.0358946	0.282154	CACNA1H	http://amigo.geneontology.org/amigo/term/GO:0120178
regulation of intracellular steroid hormone receptor signaling pathway	Gene Ontology	GO:0033143	1	7	0.0358946	0.282154	FOXH1	http://amigo.geneontology.org/amigo/term/GO:0033143
apoptotic process involved in development	Gene Ontology	GO:1902742	1	7	0.0358946	0.282154	PAX2	http://amigo.geneontology.org/amigo/term/GO:1902742
active transmembrane transporter activity	Gene Ontology	GO:0022804	2	64	0.0366818	0.285417	SLC7A13|SLC16A6	http://amigo.geneontology.org/amigo/term/GO:0022804
GTPase activity	Gene Ontology	GO:0003924	3	158	0.0377935	0.287639	FGD3|FGFR3|RET	http://amigo.geneontology.org/amigo/term/GO:0003924
olfactory bulb interneuron differentiation	Gene Ontology	GO:0021889	1	8	0.0402902	0.287639	ROBO2	http://amigo.geneontology.org/amigo/term/GO:0021889
amyloid-beta binding	Gene Ontology	GO:0001540	1	8	0.0402902	0.287639	APOA1	http://amigo.geneontology.org/amigo/term/GO:0001540
kinesin binding	Gene Ontology	GO:0019894	1	8	0.0402902	0.287639	MAPK8IP2	http://amigo.geneontology.org/amigo/term/GO:0019894
O-acyltransferase activity	Gene Ontology	GO:0008374	1	8	0.0402902	0.287639	APOA1	http://amigo.geneontology.org/amigo/term/GO:0008374
delayed rectifier potassium channel activity	Gene Ontology	GO:0005251	1	8	0.0402902	0.287639	KCNH1	http://amigo.geneontology.org/amigo/term/GO:0005251
transition metal ion transmembrane transporter activity	Gene Ontology	GO:0046915	1	8	0.0402902	0.287639	SLC30A8	http://amigo.geneontology.org/amigo/term/GO:0046915
palmitoyltransferase activity	Gene Ontology	GO:0016409	1	8	0.0402902	0.287639	ZDHHC22	http://amigo.geneontology.org/amigo/term/GO:0016409
positive regulation of telomere maintenance	Gene Ontology	GO:0032206	1	8	0.0402902	0.287639	MAPK15	http://amigo.geneontology.org/amigo/term/GO:0032206
regulation of extrinsic apoptotic signaling pathway in absence of ligand	Gene Ontology	GO:2001239	1	8	0.0402902	0.287639	RET	http://amigo.geneontology.org/amigo/term/GO:2001239
heterotrimeric G-protein complex	Gene Ontology	GO:0005834	1	8	0.0402902	0.287639	GNG3	http://amigo.geneontology.org/amigo/term/GO:0005834
neuropeptide receptor activity	Gene Ontology	GO:0008188	1	8	0.0402902	0.287639	GPR139	http://amigo.geneontology.org/amigo/term/GO:0008188
vestibulocochlear nerve development	Gene Ontology	GO:0021562	1	8	0.0402902	0.287639	PAX2	http://amigo.geneontology.org/amigo/term/GO:0021562
calcium-dependent phospholipid binding	Gene Ontology	GO:0005544	1	8	0.0402902	0.287639	SYT1	http://amigo.geneontology.org/amigo/term/GO:0005544
microtubule motor activity	Gene Ontology	GO:0003777	1	8	0.0402902	0.287639	KIFC2	http://amigo.geneontology.org/amigo/term/GO:0003777
regulation of metanephric nephron tubule epithelial cell differentiation	Gene Ontology	GO:0072307	1	8	0.0402902	0.287639	PAX2	http://amigo.geneontology.org/amigo/term/GO:0072307
G protein-coupled receptor signaling pathway, coupled to cyclic nucleotide second messenger	Gene Ontology	GO:0007187	3	164	0.0413888	0.292341	GRM4|HTR1E|SSTR2	http://amigo.geneontology.org/amigo/term/GO:0007187
dendritic tree	Gene Ontology	GO:0097447	2	69	0.0418748	0.292341	GNG13|KLHL1	http://amigo.geneontology.org/amigo/term/GO:0097447
response to peptide	Gene Ontology	GO:1901652	2	70	0.0429447	0.294582	PRLH|TFF1	http://amigo.geneontology.org/amigo/term/GO:1901652
catalytic activity	Gene Ontology	GO:0003824	10	1162	0.043861	0.294582	SERPINA12|PNLIPRP2|CYP21A2|DHRS2|ENTPD8|PGLYRP2|CST9|GRM4|GPRC5A|ADAMTS19	http://amigo.geneontology.org/amigo/term/GO:0003824
cation channel activity	Gene Ontology	GO:0005261	2	71	0.0440247	0.294582	GRIA2|KCNK15	http://amigo.geneontology.org/amigo/term/GO:0005261
rhythmic behavior	Gene Ontology	GO:0007622	1	9	0.0446659	0.294582	GHRH	http://amigo.geneontology.org/amigo/term/GO:0007622
lumenal side of membrane	Gene Ontology	GO:0098576	1	9	0.0446659	0.294582	SPPL2C	http://amigo.geneontology.org/amigo/term/GO:0098576
negative regulation of organic acid transport	Gene Ontology	GO:0032891	1	9	0.0446659	0.294582	TRH	http://amigo.geneontology.org/amigo/term/GO:0032891
negative regulation of intrinsic apoptotic signaling pathway in response to DNA damage by p53 class mediator	Gene Ontology	GO:1902166	1	9	0.0446659	0.294582	MUC1	http://amigo.geneontology.org/amigo/term/GO:1902166
specification of animal organ identity	Gene Ontology	GO:0010092	1	9	0.0446659	0.294582	FOXH1	http://amigo.geneontology.org/amigo/term/GO:0010092
sterol binding	Gene Ontology	GO:0032934	1	9	0.0446659	0.294582	APOA1	http://amigo.geneontology.org/amigo/term/GO:0032934
regulation of carbohydrate biosynthetic process	Gene Ontology	GO:0043255	1	9	0.0446659	0.294582	SERPINA12	http://amigo.geneontology.org/amigo/term/GO:0043255
ionotropic glutamate receptor activity	Gene Ontology	GO:0004970	1	9	0.0446659	0.294582	MAPK8IP2	http://amigo.geneontology.org/amigo/term/GO:0004970
dendrite	Gene Ontology	GO:0030425	2	73	0.0462148	0.301922	GNG3|KLHL1	http://amigo.geneontology.org/amigo/term/GO:0030425
syncytium formation	Gene Ontology	GO:0006949	4	292	0.0473198	0.304117	CACNA1H|MYOG|GDF15|KCNH1	http://amigo.geneontology.org/amigo/term/GO:0006949
ribonucleotide binding	Gene Ontology	GO:0032553	4	292	0.0473198	0.304117	BMPR1B|KIFC2|FGFR3|RET	http://amigo.geneontology.org/amigo/term/GO:0032553
ionotropic glutamate receptor complex	Gene Ontology	GO:0008328	1	10	0.0490216	0.304117	SHISA9	http://amigo.geneontology.org/amigo/term/GO:0008328
regulation of viral transcription	Gene Ontology	GO:0046782	1	10	0.0490216	0.304117	HPN	http://amigo.geneontology.org/amigo/term/GO:0046782
regulation of filopodium assembly	Gene Ontology	GO:0051489	1	10	0.0490216	0.304117	NEURL1	http://amigo.geneontology.org/amigo/term/GO:0051489
positive regulation of striated muscle contraction	Gene Ontology	GO:0045989	1	10	0.0490216	0.304117	CGA	http://amigo.geneontology.org/amigo/term/GO:0045989
negative regulation of interleukin-1 secretion	Gene Ontology	GO:0050711	1	10	0.0490216	0.304117	APOA1	http://amigo.geneontology.org/amigo/term/GO:0050711
response to magnetism	Gene Ontology	GO:0071000	1	10	0.0490216	0.304117	MYOG	http://amigo.geneontology.org/amigo/term/GO:0071000
epidermis morphogenesis	Gene Ontology	GO:0048730	1	10	0.0490216	0.304117	TGM3	http://amigo.geneontology.org/amigo/term/GO:0048730
cerebellar Purkinje cell layer development	Gene Ontology	GO:0021680	1	10	0.0490216	0.304117	KLHL1	http://amigo.geneontology.org/amigo/term/GO:0021680
regulation of tumor necrosis factor-mediated signaling pathway	Gene Ontology	GO:0010803	1	10	0.0490216	0.304117	APOA1	http://amigo.geneontology.org/amigo/term/GO:0010803
membrane-bounded organelle	Gene Ontology	GO:0043227	15	2030	0.0491917	0.304117	SLC44A4|CRABP2|CYP2A13|SYT1|MUC1|DHRS2|PARD6B|RET|PGLYRP2|CCDC78|PAH|MYOG|APOA1|EEF1A2|ZG16B	http://amigo.geneontology.org/amigo/term/GO:0043227
cell junction	Gene Ontology	GO:0030054	3	177	0.049745	0.304117	RIMS4|NEURL1|SHISA9	http://amigo.geneontology.org/amigo/term/GO:0030054
regulation of protein metabolic process	Gene Ontology	GO:0051246	6	571	0.0499749	0.304117	CST9L|PYDC1|HPN|EIF4E1B|FGFR3|GNG3	http://amigo.geneontology.org/amigo/term/GO:0051246
zinc ion binding	Gene Ontology	GO:0008270	3	182	0.0531612	0.304117	ADAMTS19|ZDHHC22|SLC30A8	http://amigo.geneontology.org/amigo/term/GO:0008270
calcium channel complex	Gene Ontology	GO:0034704	1	11	0.0533576	0.304117	CACNA1H	http://amigo.geneontology.org/amigo/term/GO:0034704
mesodermal cell differentiation	Gene Ontology	GO:0048333	1	11	0.0533576	0.304117	PAX2	http://amigo.geneontology.org/amigo/term/GO:0048333
regulation of apoptotic process involved in morphogenesis	Gene Ontology	GO:1902337	1	11	0.0533576	0.304117	PAX2	http://amigo.geneontology.org/amigo/term/GO:1902337
DNA catabolic process	Gene Ontology	GO:0006308	1	11	0.0533576	0.304117	DNASE1L2	http://amigo.geneontology.org/amigo/term/GO:0006308
fatty acid derivative transport	Gene Ontology	GO:1901571	1	11	0.0533576	0.304117	KISS1R	http://amigo.geneontology.org/amigo/term/GO:1901571
transforming growth factor beta receptor binding	Gene Ontology	GO:0005160	1	11	0.0533576	0.304117	GDF15	http://amigo.geneontology.org/amigo/term/GO:0005160
intrinsic apoptotic signaling pathway in response to DNA damage by p53 class mediator	Gene Ontology	GO:0042771	1	11	0.0533576	0.304117	MUC1	http://amigo.geneontology.org/amigo/term/GO:0042771
protein kinase activator activity	Gene Ontology	GO:0030295	1	11	0.0533576	0.304117	MAPK8IP2	http://amigo.geneontology.org/amigo/term/GO:0030295
regulation of tube diameter	Gene Ontology	GO:0035296	1	11	0.0533576	0.304117	SLC6A4	http://amigo.geneontology.org/amigo/term/GO:0035296
amino acid transmembrane transporter activity	Gene Ontology	GO:0015171	1	11	0.0533576	0.304117	SLC7A13	http://amigo.geneontology.org/amigo/term/GO:0015171
anchoring junction	Gene Ontology	GO:0070161	2	82	0.0565433	0.314823	FGFR3|MISP	http://amigo.geneontology.org/amigo/term/GO:0070161
neuronal cell body	Gene Ontology	GO:0043025	2	82	0.0565433	0.314823	KCNH1|HPN	http://amigo.geneontology.org/amigo/term/GO:0043025
positive regulation of chondrocyte differentiation	Gene Ontology	GO:0032332	1	12	0.057674	0.314823	BMPR1B	http://amigo.geneontology.org/amigo/term/GO:0032332
cellular response to dopamine	Gene Ontology	GO:1903351	1	12	0.057674	0.314823	HTR1E	http://amigo.geneontology.org/amigo/term/GO:1903351
filopodium assembly	Gene Ontology	GO:0046847	1	12	0.057674	0.314823	FGD3	http://amigo.geneontology.org/amigo/term/GO:0046847
lipid kinase activity	Gene Ontology	GO:0001727	1	12	0.057674	0.314823	EEF1A2	http://amigo.geneontology.org/amigo/term/GO:0001727
calcium-dependent protein binding	Gene Ontology	GO:0048306	1	12	0.057674	0.314823	TNNI3	http://amigo.geneontology.org/amigo/term/GO:0048306
chromatin DNA binding	Gene Ontology	GO:0031490	1	12	0.057674	0.314823	MYOG	http://amigo.geneontology.org/amigo/term/GO:0031490
autonomic nervous system development	Gene Ontology	GO:0048483	1	12	0.057674	0.314823	HOXB1	http://amigo.geneontology.org/amigo/term/GO:0048483
negative regulation of cellular carbohydrate metabolic process	Gene Ontology	GO:0010677	2	83	0.0577366	0.314823	SERPINA12|MYOG	http://amigo.geneontology.org/amigo/term/GO:0010677
positive regulation of macromolecule biosynthetic process	Gene Ontology	GO:0010557	4	315	0.0590805	0.320888	HOXB1|RAMP1|TMPRSS6|ARNT2	http://amigo.geneontology.org/amigo/term/GO:0010557
plasma membrane bounded cell projection organization	Gene Ontology	GO:0120036	3	193	0.0610618	0.323884	SYT1|PARD6B|ZMYND10	http://amigo.geneontology.org/amigo/term/GO:0120036
lysosome	Gene Ontology	GO:0005764	2	86	0.0613683	0.323884	EEF1A2|TSPAN1	http://amigo.geneontology.org/amigo/term/GO:0005764
regulation of macromolecule metabolic process	Gene Ontology	GO:0060255	13	1748	0.0616567	0.323884	AMH|CST9L|EEF1A2|HOXB1|AGR2|PYDC1|HYPM|CREB3L1|GNG3|SERPINA9|GDF15|SPINK4|GPRC5A	http://amigo.geneontology.org/amigo/term/GO:0060255
protein dimerization activity	Gene Ontology	GO:0046983	3	194	0.0618058	0.323884	SPPL2C|CEACAM5|ARNT2	http://amigo.geneontology.org/amigo/term/GO:0046983
regulation of epidermal growth factor receptor signaling pathway	Gene Ontology	GO:0042058	1	13	0.0619706	0.323884	PTK6	http://amigo.geneontology.org/amigo/term/GO:0042058
negative regulation of BMP signaling pathway	Gene Ontology	GO:0030514	1	13	0.0619706	0.323884	TMPRSS6	http://amigo.geneontology.org/amigo/term/GO:0030514
Golgi lumen	Gene Ontology	GO:0005796	1	13	0.0619706	0.323884	MUC1	http://amigo.geneontology.org/amigo/term/GO:0005796
positive regulation of insulin secretion	Gene Ontology	GO:0032024	1	13	0.0619706	0.323884	TRH	http://amigo.geneontology.org/amigo/term/GO:0032024
voltage-gated calcium channel activity	Gene Ontology	GO:0005245	1	13	0.0619706	0.323884	CACNG1	http://amigo.geneontology.org/amigo/term/GO:0005245
muscle atrophy	Gene Ontology	GO:0014889	1	13	0.0619706	0.323884	MYOG	http://amigo.geneontology.org/amigo/term/GO:0014889
sphingolipid biosynthetic process	Gene Ontology	GO:0030148	1	14	0.0662478	0.34109	DEGS2	http://amigo.geneontology.org/amigo/term/GO:0030148
voltage-gated potassium channel activity	Gene Ontology	GO:0005249	1	14	0.0662478	0.34109	KCNJ3	http://amigo.geneontology.org/amigo/term/GO:0005249
positive regulation of transcription by RNA polymerase II	Gene Ontology	GO:0045944	3	201	0.0671315	0.34436	HOXB1|TMPRSS6|PAX2	http://amigo.geneontology.org/amigo/term/GO:0045944
whole membrane	Gene Ontology	GO:0098805	3	204	0.0694762	0.348751	GRIA2|SYT1|SLC30A8	http://amigo.geneontology.org/amigo/term/GO:0098805
regulation of cilium assembly	Gene Ontology	GO:1902017	1	15	0.0705056	0.348751	CCDC151	http://amigo.geneontology.org/amigo/term/GO:1902017
neural crest cell differentiation	Gene Ontology	GO:0014033	1	15	0.0705056	0.348751	RET	http://amigo.geneontology.org/amigo/term/GO:0014033
regulation of morphogenesis of a branching structure	Gene Ontology	GO:0060688	1	15	0.0705056	0.348751	PAX2	http://amigo.geneontology.org/amigo/term/GO:0060688
steroid hormone receptor binding	Gene Ontology	GO:0035258	1	15	0.0705056	0.348751	FOXH1	http://amigo.geneontology.org/amigo/term/GO:0035258
growth factor binding	Gene Ontology	GO:0019838	1	15	0.0705056	0.348751	IGFALS	http://amigo.geneontology.org/amigo/term/GO:0019838
purine nucleoside diphosphate metabolic process	Gene Ontology	GO:0009135	1	15	0.0705056	0.348751	MYOG	http://amigo.geneontology.org/amigo/term/GO:0009135
exopeptidase activity	Gene Ontology	GO:0008238	1	15	0.0705056	0.348751	HPN	http://amigo.geneontology.org/amigo/term/GO:0008238
ammonium transport	Gene Ontology	GO:0015696	1	15	0.0705056	0.348751	SLC44A4	http://amigo.geneontology.org/amigo/term/GO:0015696
structural molecule activity	Gene Ontology	GO:0005198	2	94	0.0714162	0.35075	KRT31|KRT35	http://amigo.geneontology.org/amigo/term/GO:0005198
synaptic signaling	Gene Ontology	GO:0099536	2	95	0.0727076	0.354522	LRFN2|MAPK8IP2	http://amigo.geneontology.org/amigo/term/GO:0099536
vacuole	Gene Ontology	GO:0005773	2	95	0.0727076	0.354522	CGA|TSPAN1	http://amigo.geneontology.org/amigo/term/GO:0005773
transporter activity	Gene Ontology	GO:0005215	3	210	0.0742751	0.354522	LCN12|TNNI3|SLC6A4	http://amigo.geneontology.org/amigo/term/GO:0005215
skin epidermis development	Gene Ontology	GO:0098773	1	16	0.074744	0.354522	DNASE1L2	http://amigo.geneontology.org/amigo/term/GO:0098773
positive regulation of synapse maturation	Gene Ontology	GO:0090129	1	16	0.074744	0.354522	NEURL1	http://amigo.geneontology.org/amigo/term/GO:0090129
pathway-restricted SMAD protein phosphorylation	Gene Ontology	GO:0060389	1	16	0.074744	0.354522	GDF15	http://amigo.geneontology.org/amigo/term/GO:0060389
regulation of DNA-templated transcription in response to stress	Gene Ontology	GO:0043620	1	16	0.074744	0.354522	MUC1	http://amigo.geneontology.org/amigo/term/GO:0043620
axon terminus	Gene Ontology	GO:0043679	1	16	0.074744	0.354522	SYT1	http://amigo.geneontology.org/amigo/term/GO:0043679
modified amino acid binding	Gene Ontology	GO:0072341	1	16	0.074744	0.354522	SYT1	http://amigo.geneontology.org/amigo/term/GO:0072341
DNA polymerase activity	Gene Ontology	GO:0034061	1	16	0.074744	0.354522	MAPK15	http://amigo.geneontology.org/amigo/term/GO:0034061
transcription factor binding	Gene Ontology	GO:0008134	2	99	0.0779475	0.365766	FOXH1|PAX2	http://amigo.geneontology.org/amigo/term/GO:0008134
ion binding	Gene Ontology	GO:0043167	8	962	0.0780722	0.365766	PNLIPRP2|TRIM72|CYP2A13|CLGN|BMPR1B|LCN12|NELL2|CAPN9	http://amigo.geneontology.org/amigo/term/GO:0043167
transition metal ion binding	Gene Ontology	GO:0046914	3	215	0.0783837	0.365766	CYP21A2|TRIM72|CPB1	http://amigo.geneontology.org/amigo/term/GO:0046914
regulation of actin filament bundle assembly	Gene Ontology	GO:0032231	1	17	0.0789632	0.365766	KISS1R	http://amigo.geneontology.org/amigo/term/GO:0032231
postsynaptic specialization	Gene Ontology	GO:0099572	1	17	0.0789632	0.365766	BCAS1	http://amigo.geneontology.org/amigo/term/GO:0099572
glycoprotein metabolic process	Gene Ontology	GO:0009100	2	100	0.0792757	0.365989	MUC1|HS6ST3	http://amigo.geneontology.org/amigo/term/GO:0009100
positive regulation of biosynthetic process	Gene Ontology	GO:0009891	4	350	0.0796702	0.366589	FOXH1|MYOG|HOXB1|CREB3L1	http://amigo.geneontology.org/amigo/term/GO:0009891
organic substance metabolic process	Gene Ontology	GO:0071704	17	2548	0.0801421	0.367539	TGM3|MAPK8IP2|SLC6A4|CST9L|KLHL1|HOXB1|RAMP1|CPB1|GSTA3|CREB3L1|DIO1|PAX2|PAH|SPPL2C|CAPN9|DUSP13|FAM135B	http://amigo.geneontology.org/amigo/term/GO:0071704
axoneme assembly	Gene Ontology	GO:0035082	2	101	0.0806109	0.368469	CCDC151|ZMYND10	http://amigo.geneontology.org/amigo/term/GO:0035082
protein-containing complex binding	Gene Ontology	GO:0044877	2	102	0.0819531	0.36917	APOA1|SLC6A4	http://amigo.geneontology.org/amigo/term/GO:0044877
cranial nerve development	Gene Ontology	GO:0021545	1	18	0.0831632	0.36917	SLITRK6	http://amigo.geneontology.org/amigo/term/GO:0021545
steroid binding	Gene Ontology	GO:0005496	1	18	0.0831632	0.36917	APOA1	http://amigo.geneontology.org/amigo/term/GO:0005496
cranial nerve morphogenesis	Gene Ontology	GO:0021602	1	18	0.0831632	0.36917	PAX2	http://amigo.geneontology.org/amigo/term/GO:0021602
negative regulation of lymphocyte differentiation	Gene Ontology	GO:0045620	1	18	0.0831632	0.36917	PGLYRP2	http://amigo.geneontology.org/amigo/term/GO:0045620
perikaryon	Gene Ontology	GO:0043204	1	18	0.0831632	0.36917	NEURL1	http://amigo.geneontology.org/amigo/term/GO:0043204
protein O-linked glycosylation	Gene Ontology	GO:0006493	1	18	0.0831632	0.36917	MUC1	http://amigo.geneontology.org/amigo/term/GO:0006493
cellular response to glucose stimulus	Gene Ontology	GO:0071333	1	18	0.0831632	0.36917	PAX2	http://amigo.geneontology.org/amigo/term/GO:0071333
extracellular ligand-gated ion channel activity	Gene Ontology	GO:0005230	1	18	0.0831632	0.36917	CACNG4	http://amigo.geneontology.org/amigo/term/GO:0005230
passive transmembrane transporter activity	Gene Ontology	GO:0022803	2	104	0.084658	0.374605	HPN|TNNI3	http://amigo.geneontology.org/amigo/term/GO:0022803
Rho guanyl-nucleotide exchange factor activity	Gene Ontology	GO:0005089	1	19	0.0873441	0.379221	FGD3	http://amigo.geneontology.org/amigo/term/GO:0005089
negative regulation of small molecule metabolic process	Gene Ontology	GO:0062014	1	19	0.0873441	0.379221	SERPINA12	http://amigo.geneontology.org/amigo/term/GO:0062014
regulation of mesenchymal cell apoptotic process	Gene Ontology	GO:2001053	1	19	0.0873441	0.379221	PAX2	http://amigo.geneontology.org/amigo/term/GO:2001053
protein stabilization	Gene Ontology	GO:0050821	1	19	0.0873441	0.379221	TSPAN1	http://amigo.geneontology.org/amigo/term/GO:0050821
response to electrical stimulus involved in regulation of muscle adaptation	Gene Ontology	GO:0014878	1	19	0.0873441	0.379221	MYOG	http://amigo.geneontology.org/amigo/term/GO:0014878
mesenchymal cell apoptotic process	Gene Ontology	GO:0097152	1	20	0.091506	0.389956	PAX2	http://amigo.geneontology.org/amigo/term/GO:0097152
natural killer cell activation involved in immune response	Gene Ontology	GO:0002323	1	20	0.091506	0.389956	PGLYRP2	http://amigo.geneontology.org/amigo/term/GO:0002323
oxidoreductase activity, acting on CH-OH group of donors	Gene Ontology	GO:0016614	1	20	0.091506	0.389956	AKR7A3	http://amigo.geneontology.org/amigo/term/GO:0016614
negative regulation of muscle cell differentiation	Gene Ontology	GO:0051148	1	20	0.091506	0.389956	CEACAM5	http://amigo.geneontology.org/amigo/term/GO:0051148
response to BMP	Gene Ontology	GO:0071772	1	20	0.091506	0.389956	TMPRSS6	http://amigo.geneontology.org/amigo/term/GO:0071772
regulation of response to wounding	Gene Ontology	GO:1903034	1	20	0.091506	0.389956	TMPRSS6	http://amigo.geneontology.org/amigo/term/GO:1903034
peptidyl-tyrosine dephosphorylation	Gene Ontology	GO:0035335	1	21	0.095649	0.400223	DUSP13	http://amigo.geneontology.org/amigo/term/GO:0035335
serine-type endopeptidase inhibitor activity	Gene Ontology	GO:0004867	1	21	0.095649	0.400223	SERPINA12	http://amigo.geneontology.org/amigo/term/GO:0004867
positive regulation of establishment of protein localization to mitochondrion	Gene Ontology	GO:1903749	1	21	0.095649	0.400223	LRRC46	http://amigo.geneontology.org/amigo/term/GO:1903749
coated vesicle membrane	Gene Ontology	GO:0030662	1	21	0.095649	0.400223	SYT1	http://amigo.geneontology.org/amigo/term/GO:0030662
regulation of regulated secretory pathway	Gene Ontology	GO:1903305	1	21	0.095649	0.400223	SYT1	http://amigo.geneontology.org/amigo/term/GO:1903305
negative regulation of mesenchymal cell apoptotic process	Gene Ontology	GO:2001054	1	22	0.0997732	0.413417	PAX2	http://amigo.geneontology.org/amigo/term/GO:2001054
negative regulation of transmembrane receptor protein serine/threonine kinase signaling pathway	Gene Ontology	GO:0090101	1	22	0.0997732	0.413417	TMPRSS6	http://amigo.geneontology.org/amigo/term/GO:0090101
hormone activity	Gene Ontology	GO:0005179	1	22	0.0997732	0.413417	PYY	http://amigo.geneontology.org/amigo/term/GO:0005179
lipid binding	Gene Ontology	GO:0008289	2	115	0.0999963	0.413417	BPIFB1|LCN12	http://amigo.geneontology.org/amigo/term/GO:0008289
polymeric cytoskeletal fiber	Gene Ontology	GO:0099513	2	116	0.101427	0.418084	KIFC2|TUBA3E	http://amigo.geneontology.org/amigo/term/GO:0099513
leading edge membrane	Gene Ontology	GO:0031256	1	23	0.103879	0.421912	ROBO2	http://amigo.geneontology.org/amigo/term/GO:0031256
regulation of fat cell differentiation	Gene Ontology	GO:0045598	1	23	0.103879	0.421912	FAM57B	http://amigo.geneontology.org/amigo/term/GO:0045598
membrane lipid biosynthetic process	Gene Ontology	GO:0046467	1	23	0.103879	0.421912	DEGS2	http://amigo.geneontology.org/amigo/term/GO:0046467
sphingolipid metabolic process	Gene Ontology	GO:0006665	1	23	0.103879	0.421912	SPTSSB	http://amigo.geneontology.org/amigo/term/GO:0006665
positive regulation of vasculature development	Gene Ontology	GO:1904018	1	23	0.103879	0.421912	LRG1	http://amigo.geneontology.org/amigo/term/GO:1904018
cell surface	Gene Ontology	GO:0009986	2	119	0.105753	0.424553	ROBO2|TNFRSF18	http://amigo.geneontology.org/amigo/term/GO:0009986
potassium channel activity	Gene Ontology	GO:0005267	1	24	0.107966	0.424553	KCNF1	http://amigo.geneontology.org/amigo/term/GO:0005267
positive regulation of cell growth	Gene Ontology	GO:0030307	1	24	0.107966	0.424553	CRABP2	http://amigo.geneontology.org/amigo/term/GO:0030307
endopeptidase regulator activity	Gene Ontology	GO:0061135	1	24	0.107966	0.424553	CST9L	http://amigo.geneontology.org/amigo/term/GO:0061135
sarcolemma	Gene Ontology	GO:0042383	1	24	0.107966	0.424553	TRIM72	http://amigo.geneontology.org/amigo/term/GO:0042383
regulation of extrinsic apoptotic signaling pathway via death domain receptors	Gene Ontology	GO:1902041	1	24	0.107966	0.424553	BMPR1B	http://amigo.geneontology.org/amigo/term/GO:1902041
actin filament bundle assembly	Gene Ontology	GO:0051017	1	24	0.107966	0.424553	KISS1R	http://amigo.geneontology.org/amigo/term/GO:0051017
regulation of plasma membrane bounded cell projection assembly	Gene Ontology	GO:0120032	1	24	0.107966	0.424553	CLRN1	http://amigo.geneontology.org/amigo/term/GO:0120032
response to monoamine	Gene Ontology	GO:0071867	1	24	0.107966	0.424553	CALY	http://amigo.geneontology.org/amigo/term/GO:0071867
oxidoreductase activity	Gene Ontology	GO:0016491	2	121	0.108664	0.424553	AKR7A3|DIO1	http://amigo.geneontology.org/amigo/term/GO:0016491
inorganic cation transmembrane transporter activity	Gene Ontology	GO:0022890	2	121	0.108664	0.424553	CACNG1|TNNI3	http://amigo.geneontology.org/amigo/term/GO:0022890
integral component of membrane	Gene Ontology	GO:0016021	7	871	0.10882	0.424553	SLC6A4|SYT1|RAMP1|BMPR1B|CEACAM6|SHISA9|NKAIN1	http://amigo.geneontology.org/amigo/term/GO:0016021
positive regulation of RNA metabolic process	Gene Ontology	GO:0051254	3	250	0.109746	0.425114	MUC1|HOXB1|PAX2	http://amigo.geneontology.org/amigo/term/GO:0051254
cell-cell adhesion	Gene Ontology	GO:0098609	2	122	0.110128	0.425114	ROBO2|RET	http://amigo.geneontology.org/amigo/term/GO:0098609
negative regulation of developmental growth	Gene Ontology	GO:0048640	1	25	0.112034	0.425114	FGFR3	http://amigo.geneontology.org/amigo/term/GO:0048640
mesenchymal to epithelial transition	Gene Ontology	GO:0060231	1	25	0.112034	0.425114	PAX2	http://amigo.geneontology.org/amigo/term/GO:0060231
extrinsic component of plasma membrane	Gene Ontology	GO:0019897	1	25	0.112034	0.425114	SRMS	http://amigo.geneontology.org/amigo/term/GO:0019897
regulation of protein oligomerization	Gene Ontology	GO:0032459	1	25	0.112034	0.425114	CLGN	http://amigo.geneontology.org/amigo/term/GO:0032459
microtubule binding	Gene Ontology	GO:0008017	1	25	0.112034	0.425114	KIFC2	http://amigo.geneontology.org/amigo/term/GO:0008017
metanephric mesenchyme development	Gene Ontology	GO:0072075	1	25	0.112034	0.425114	PAX2	http://amigo.geneontology.org/amigo/term/GO:0072075
intracellular estrogen receptor signaling pathway	Gene Ontology	GO:0030520	1	25	0.112034	0.425114	FOXH1	http://amigo.geneontology.org/amigo/term/GO:0030520
SNARE binding	Gene Ontology	GO:0000149	1	25	0.112034	0.425114	SYT9	http://amigo.geneontology.org/amigo/term/GO:0000149
plasma membrane bounded cell projection	Gene Ontology	GO:0120025	3	255	0.11457	0.429882	SYT1|GHRH|GNG13	http://amigo.geneontology.org/amigo/term/GO:0120025
regulation of protein targeting	Gene Ontology	GO:1903533	1	26	0.116084	0.429882	LRRC46	http://amigo.geneontology.org/amigo/term/GO:1903533
cytoplasmic side of membrane	Gene Ontology	GO:0098562	1	26	0.116084	0.429882	SPPL2C	http://amigo.geneontology.org/amigo/term/GO:0098562
negative regulation of synaptic transmission, dopaminergic	Gene Ontology	GO:0032227	1	26	0.116084	0.429882	SLC6A4	http://amigo.geneontology.org/amigo/term/GO:0032227
positive regulation of small molecule metabolic process	Gene Ontology	GO:0062013	1	26	0.116084	0.429882	APOA1	http://amigo.geneontology.org/amigo/term/GO:0062013
metanephric nephron tubule formation	Gene Ontology	GO:0072289	1	26	0.116084	0.429882	PAX2	http://amigo.geneontology.org/amigo/term/GO:0072289
carboxylic ester hydrolase activity	Gene Ontology	GO:0052689	1	26	0.116084	0.429882	FAM135B	http://amigo.geneontology.org/amigo/term/GO:0052689
ligand-gated cation channel activity	Gene Ontology	GO:0099094	1	26	0.116084	0.429882	MAPK8IP2	http://amigo.geneontology.org/amigo/term/GO:0099094
plasma membrane region	Gene Ontology	GO:0098590	2	128	0.119016	0.439566	S100G|SHISA9	http://amigo.geneontology.org/amigo/term/GO:0098590
sodium ion transmembrane transporter activity	Gene Ontology	GO:0015081	1	27	0.120115	0.442445	SLC6A4	http://amigo.geneontology.org/amigo/term/GO:0015081
cellular response to endogenous stimulus	Gene Ontology	GO:0071495	4	409	0.121227	0.445357	GDF15|SSTR2|GNG3|GNG13	http://amigo.geneontology.org/amigo/term/GO:0071495
negative regulation of intrinsic apoptotic signaling pathway	Gene Ontology	GO:2001243	1	28	0.124128	0.447701	MUC1	http://amigo.geneontology.org/amigo/term/GO:2001243
protein binding, bridging	Gene Ontology	GO:0030674	1	28	0.124128	0.447701	MAPK8IP2	http://amigo.geneontology.org/amigo/term/GO:0030674
carboxylic acid binding	Gene Ontology	GO:0031406	1	28	0.124128	0.447701	CRABP2	http://amigo.geneontology.org/amigo/term/GO:0031406
negative regulation of secretion by cell	Gene Ontology	GO:1903531	1	28	0.124128	0.447701	CGA	http://amigo.geneontology.org/amigo/term/GO:1903531
cytoplasmic side of plasma membrane	Gene Ontology	GO:0009898	1	28	0.124128	0.447701	SRMS	http://amigo.geneontology.org/amigo/term/GO:0009898
actin filament bundle organization	Gene Ontology	GO:0061572	1	28	0.124128	0.447701	KISS1R	http://amigo.geneontology.org/amigo/term/GO:0061572
nephron epithelium morphogenesis	Gene Ontology	GO:0072088	1	28	0.124128	0.447701	PAX2	http://amigo.geneontology.org/amigo/term/GO:0072088
inorganic ion transmembrane transport	Gene Ontology	GO:0098660	2	132	0.125038	0.449811	KCNJ3|SLC30A8	http://amigo.geneontology.org/amigo/term/GO:0098660
regulation of proteolysis	Gene Ontology	GO:0030162	2	133	0.126554	0.454088	CST5|PAX2	http://amigo.geneontology.org/amigo/term/GO:0030162
actin-based cell projection	Gene Ontology	GO:0098858	1	29	0.128123	0.45617	STARD10	http://amigo.geneontology.org/amigo/term/GO:0098858
calmodulin binding	Gene Ontology	GO:0005516	1	29	0.128123	0.45617	KCNH1	http://amigo.geneontology.org/amigo/term/GO:0005516
cytoplasmic region	Gene Ontology	GO:0099568	1	29	0.128123	0.45617	SPEF1	http://amigo.geneontology.org/amigo/term/GO:0099568
positive regulation of cellular protein metabolic process	Gene Ontology	GO:0032270	3	269	0.128491	0.456307	GDF15|HPN|DOK7	http://amigo.geneontology.org/amigo/term/GO:0032270
response to growth factor	Gene Ontology	GO:0070848	2	135	0.129601	0.459073	LRG1|FGFR3	http://amigo.geneontology.org/amigo/term/GO:0070848
regulation of morphogenesis of an epithelium	Gene Ontology	GO:1905330	1	30	0.132099	0.460502	PAX2	http://amigo.geneontology.org/amigo/term/GO:1905330
neuron spine	Gene Ontology	GO:0044309	1	30	0.132099	0.460502	NEURL1	http://amigo.geneontology.org/amigo/term/GO:0044309
ERBB signaling pathway	Gene Ontology	GO:0038127	1	30	0.132099	0.460502	PTK6	http://amigo.geneontology.org/amigo/term/GO:0038127
regulation of mesenchymal cell apoptotic process involved in nephron morphogenesis	Gene Ontology	GO:0072039	1	30	0.132099	0.460502	PAX2	http://amigo.geneontology.org/amigo/term/GO:0072039
lamellipodium	Gene Ontology	GO:0030027	1	30	0.132099	0.460502	FGD3	http://amigo.geneontology.org/amigo/term/GO:0030027
calcium ion binding	Gene Ontology	GO:0005509	2	137	0.132665	0.460502	PVALB|CLGN	http://amigo.geneontology.org/amigo/term/GO:0005509
positive regulation of organelle organization	Gene Ontology	GO:0010638	2	137	0.132665	0.460502	MUC1|PYDC1	http://amigo.geneontology.org/amigo/term/GO:0010638
cell projection	Gene Ontology	GO:0042995	3	276	0.135667	0.465285	NELL2|ROBO2|GNG3	http://amigo.geneontology.org/amigo/term/GO:0042995
lipase activity	Gene Ontology	GO:0016298	1	31	0.136058	0.465285	APOA1	http://amigo.geneontology.org/amigo/term/GO:0016298
regulation of mesenchymal cell apoptotic process involved in metanephros development	Gene Ontology	GO:1900211	1	31	0.136058	0.465285	PAX2	http://amigo.geneontology.org/amigo/term/GO:1900211
positive regulation of metanephric DCT cell differentiation	Gene Ontology	GO:2000594	1	31	0.136058	0.465285	PAX2	http://amigo.geneontology.org/amigo/term/GO:2000594
positive regulation of extrinsic apoptotic signaling pathway	Gene Ontology	GO:2001238	1	31	0.136058	0.465285	RET	http://amigo.geneontology.org/amigo/term/GO:2001238
cytoskeletal protein binding	Gene Ontology	GO:0008092	2	140	0.137291	0.468344	TNNT1|MAPK8IP2	http://amigo.geneontology.org/amigo/term/GO:0008092
nucleoside diphosphate phosphorylation	Gene Ontology	GO:0006165	1	32	0.139999	0.471772	MYOG	http://amigo.geneontology.org/amigo/term/GO:0006165
phosphatase binding	Gene Ontology	GO:0019902	1	32	0.139999	0.471772	TPRN	http://amigo.geneontology.org/amigo/term/GO:0019902
endoplasmic reticulum lumen	Gene Ontology	GO:0005788	1	32	0.139999	0.471772	F7	http://amigo.geneontology.org/amigo/term/GO:0005788
ER-nucleus signaling pathway	Gene Ontology	GO:0006984	1	32	0.139999	0.471772	AGR2	http://amigo.geneontology.org/amigo/term/GO:0006984
cellular response to unfolded protein	Gene Ontology	GO:0034620	1	32	0.139999	0.471772	AGR2	http://amigo.geneontology.org/amigo/term/GO:0034620
intrinsic component of plasma membrane	Gene Ontology	GO:0031226	3	283	0.142977	0.474598	KISS1R|CACNG4|RET	http://amigo.geneontology.org/amigo/term/GO:0031226
voltage-gated ion channel activity	Gene Ontology	GO:0005244	1	33	0.143921	0.474598	KCNF1	http://amigo.geneontology.org/amigo/term/GO:0005244
myelin sheath	Gene Ontology	GO:0043209	1	33	0.143921	0.474598	EEF1A2	http://amigo.geneontology.org/amigo/term/GO:0043209
cation channel complex	Gene Ontology	GO:0034703	1	33	0.143921	0.474598	SHISA9	http://amigo.geneontology.org/amigo/term/GO:0034703
voltage-gated cation channel activity	Gene Ontology	GO:0022843	1	33	0.143921	0.474598	CACNG1	http://amigo.geneontology.org/amigo/term/GO:0022843
transferase complex, transferring phosphorus-containing groups	Gene Ontology	GO:0061695	1	33	0.143921	0.474598	PYDC1	http://amigo.geneontology.org/amigo/term/GO:0061695
metallopeptidase activity	Gene Ontology	GO:0008237	1	33	0.143921	0.474598	CPB1	http://amigo.geneontology.org/amigo/term/GO:0008237
transferase activity, transferring acyl groups	Gene Ontology	GO:0016746	1	33	0.143921	0.474598	TGM3	http://amigo.geneontology.org/amigo/term/GO:0016746
negative regulation of transferase activity	Gene Ontology	GO:0051348	1	33	0.143921	0.474598	PTK6	http://amigo.geneontology.org/amigo/term/GO:0051348
neuropeptide signaling pathway	Gene Ontology	GO:0007218	2	145	0.145078	0.477275	PYY|GPR139	http://amigo.geneontology.org/amigo/term/GO:0007218
negative regulation of catabolic process	Gene Ontology	GO:0009895	1	34	0.147826	0.482876	MYOG	http://amigo.geneontology.org/amigo/term/GO:0009895
transport vesicle membrane	Gene Ontology	GO:0030658	1	34	0.147826	0.482876	SYT9	http://amigo.geneontology.org/amigo/term/GO:0030658
cell-cell adhesion via plasma-membrane adhesion molecules	Gene Ontology	GO:0098742	1	34	0.147826	0.482876	CDH7	http://amigo.geneontology.org/amigo/term/GO:0098742
cytoplasmic vesicle	Gene Ontology	GO:0031410	3	289	0.149345	0.48669	SYT1|KCNH1|TRIM72	http://amigo.geneontology.org/amigo/term/GO:0031410
negative regulation of cellular protein metabolic process	Gene Ontology	GO:0032269	2	150	0.152955	0.497282	CST9L|PYDC1	http://amigo.geneontology.org/amigo/term/GO:0032269
primary metabolic process	Gene Ontology	GO:0044238	14	2249	0.154774	0.501122	FAM57B|AMH|TGM3|CYP21A2|EEF1A2|DHRS2|RET|RHBDL1|PRLH|CAPN9|HS6ST3|GRM4|MAPK8IP2|CST5	http://amigo.geneontology.org/amigo/term/GO:0044238
negative regulation of nervous system development	Gene Ontology	GO:0051961	1	36	0.155583	0.501122	ROBO2	http://amigo.geneontology.org/amigo/term/GO:0051961
response to amino acid	Gene Ontology	GO:0043200	1	36	0.155583	0.501122	NEURL1	http://amigo.geneontology.org/amigo/term/GO:0043200
cell-cell junction organization	Gene Ontology	GO:0045216	1	36	0.155583	0.501122	PARD6B	http://amigo.geneontology.org/amigo/term/GO:0045216
nuclear outer membrane-endoplasmic reticulum membrane network	Gene Ontology	GO:0042175	2	152	0.156128	0.501712	FAM57B|SPTSSB	http://amigo.geneontology.org/amigo/term/GO:0042175
positive regulation of osteoclast differentiation	Gene Ontology	GO:0045672	1	37	0.159435	0.503	IL20	http://amigo.geneontology.org/amigo/term/GO:0045672
nodal signaling pathway	Gene Ontology	GO:0038092	1	37	0.159435	0.503	FOXH1	http://amigo.geneontology.org/amigo/term/GO:0038092
organic acid binding	Gene Ontology	GO:0043177	1	37	0.159435	0.503	PAH	http://amigo.geneontology.org/amigo/term/GO:0043177
ovulation cycle	Gene Ontology	GO:0042698	1	37	0.159435	0.503	BMPR1B	http://amigo.geneontology.org/amigo/term/GO:0042698
negative regulation of protein kinase activity	Gene Ontology	GO:0006469	1	37	0.159435	0.503	GPRC5A	http://amigo.geneontology.org/amigo/term/GO:0006469
positive regulation of transmembrane receptor protein serine/threonine kinase signaling pathway	Gene Ontology	GO:0090100	1	37	0.159435	0.503	GDF15	http://amigo.geneontology.org/amigo/term/GO:0090100
regulation of signal transduction	Gene Ontology	GO:0009966	8	1150	0.161548	0.508152	SERPINA12|STARD10|CGA|TMPRSS6|NEURL1|GRM4|LRG1|GPRC5A	http://amigo.geneontology.org/amigo/term/GO:0009966
export from cell	Gene Ontology	GO:0140352	2	156	0.162513	0.508152	SYT13|RAB26	http://amigo.geneontology.org/amigo/term/GO:0140352
sequence-specific DNA binding	Gene Ontology	GO:0043565	2	156	0.162513	0.508152	ARNT2|EMX1	http://amigo.geneontology.org/amigo/term/GO:0043565
protein tyrosine kinase activity	Gene Ontology	GO:0004713	1	38	0.163269	0.508152	NEURL1	http://amigo.geneontology.org/amigo/term/GO:0004713
phosphatidylinositol binding	Gene Ontology	GO:0035091	1	38	0.163269	0.508152	CEACAM5	http://amigo.geneontology.org/amigo/term/GO:0035091
regulation of cell projection assembly	Gene Ontology	GO:0060491	1	38	0.163269	0.508152	NEURL1	http://amigo.geneontology.org/amigo/term/GO:0060491
negative regulation of transport	Gene Ontology	GO:0051051	3	304	0.165649	0.510848	CGA|TRH|APOA1	http://amigo.geneontology.org/amigo/term/GO:0051051
endoplasmic reticulum membrane	Gene Ontology	GO:0005789	2	158	0.165723	0.510848	CYP2A13|CYP2B6	http://amigo.geneontology.org/amigo/term/GO:0005789
Ras guanyl-nucleotide exchange factor activity	Gene Ontology	GO:0005088	1	39	0.167086	0.510848	FGFR3	http://amigo.geneontology.org/amigo/term/GO:0005088
peptide binding	Gene Ontology	GO:0042277	1	39	0.167086	0.510848	MAPK8IP2	http://amigo.geneontology.org/amigo/term/GO:0042277
nuclease activity	Gene Ontology	GO:0004518	1	39	0.167086	0.510848	DNASE1L2	http://amigo.geneontology.org/amigo/term/GO:0004518
positive regulation of protein oligomerization	Gene Ontology	GO:0032461	1	39	0.167086	0.510848	CLGN	http://amigo.geneontology.org/amigo/term/GO:0032461
oxidoreductase activity, acting on paired donors, with incorporation or reduction of molecular oxygen	Gene Ontology	GO:0016705	1	39	0.167086	0.510848	CYP21A2	http://amigo.geneontology.org/amigo/term/GO:0016705
negative regulation of proteolysis	Gene Ontology	GO:0045861	1	39	0.167086	0.510848	SERPINA9	http://amigo.geneontology.org/amigo/term/GO:0045861
regulation of anatomical structure morphogenesis	Gene Ontology	GO:0022603	3	306	0.167862	0.512091	METRN|CRABP2|PAX2	http://amigo.geneontology.org/amigo/term/GO:0022603
appendage morphogenesis	Gene Ontology	GO:0035107	2	160	0.168944	0.512114	BMPR1B|CRABP2	http://amigo.geneontology.org/amigo/term/GO:0035107
small molecule binding	Gene Ontology	GO:0036094	4	467	0.16928	0.512114	PAH|CYP2B6|APOA1|PTK6	http://amigo.geneontology.org/amigo/term/GO:0036094
protein homooligomerization	Gene Ontology	GO:0051260	2	161	0.170559	0.512114	SYT1|CALHM1	http://amigo.geneontology.org/amigo/term/GO:0051260
regulation of small molecule metabolic process	Gene Ontology	GO:0062012	1	40	0.170886	0.512114	MYOG	http://amigo.geneontology.org/amigo/term/GO:0062012
transforming growth factor beta receptor signaling pathway	Gene Ontology	GO:0007179	1	40	0.170886	0.512114	FOXH1	http://amigo.geneontology.org/amigo/term/GO:0007179
iron ion homeostasis	Gene Ontology	GO:0055072	1	40	0.170886	0.512114	TMPRSS6	http://amigo.geneontology.org/amigo/term/GO:0055072
positive regulation of nitrogen compound metabolic process	Gene Ontology	GO:0051173	4	469	0.171045	0.512114	NEURL1|FGFR3|TMPRSS6|PAX2	http://amigo.geneontology.org/amigo/term/GO:0051173
purine ribonucleoside triphosphate binding	Gene Ontology	GO:0035639	3	309	0.171198	0.512114	RAB26|RET|FGFR3	http://amigo.geneontology.org/amigo/term/GO:0035639
cation binding	Gene Ontology	GO:0043169	5	641	0.174154	0.514714	SYT9|ZDHHC22|CIB3|S100G|PGLYRP2	http://amigo.geneontology.org/amigo/term/GO:0043169
secondary active transmembrane transporter activity	Gene Ontology	GO:0015291	1	41	0.174668	0.514714	SLC6A4	http://amigo.geneontology.org/amigo/term/GO:0015291
positive regulation of cellular protein localization	Gene Ontology	GO:1903829	1	41	0.174668	0.514714	LRRC46	http://amigo.geneontology.org/amigo/term/GO:1903829
synaptic membrane	Gene Ontology	GO:0097060	1	41	0.174668	0.514714	SHISA9	http://amigo.geneontology.org/amigo/term/GO:0097060
cysteine-type endopeptidase activity	Gene Ontology	GO:0004197	1	41	0.174668	0.514714	CAPN9	http://amigo.geneontology.org/amigo/term/GO:0004197
intrinsic component of organelle membrane	Gene Ontology	GO:0031300	1	41	0.174668	0.514714	SPPL2C	http://amigo.geneontology.org/amigo/term/GO:0031300
bone development	Gene Ontology	GO:0060348	1	41	0.174668	0.514714	BMPR1B	http://amigo.geneontology.org/amigo/term/GO:0060348
transferase activity	Gene Ontology	GO:0016740	4	474	0.175486	0.516024	GRM4|MAPK15|KCNH1|APOA1	http://amigo.geneontology.org/amigo/term/GO:0016740
pattern specification process	Gene Ontology	GO:0007389	2	167	0.180299	0.529055	HOXB1|PAX2	http://amigo.geneontology.org/amigo/term/GO:0007389
sensory perception of taste	Gene Ontology	GO:0050909	1	43	0.182181	0.532323	GNG13	http://amigo.geneontology.org/amigo/term/GO:0050909
early endosome	Gene Ontology	GO:0005769	1	43	0.182181	0.532323	APOA1	http://amigo.geneontology.org/amigo/term/GO:0005769
active ion transmembrane transporter activity	Gene Ontology	GO:0022853	1	44	0.185912	0.537717	SLC22A24	http://amigo.geneontology.org/amigo/term/GO:0022853
negative regulation of kinase activity	Gene Ontology	GO:0033673	1	44	0.185912	0.537717	PYDC1	http://amigo.geneontology.org/amigo/term/GO:0033673
carbohydrate binding	Gene Ontology	GO:0030246	1	44	0.185912	0.537717	LGALS9B	http://amigo.geneontology.org/amigo/term/GO:0030246
positive regulation of cellular process	Gene Ontology	GO:0048522	10	1567	0.185968	0.537717	SYT9|GHRH|F7|TRH|METRN|RAMP1|PYDC1|MAPK15|CREB3L1|DOK7	http://amigo.geneontology.org/amigo/term/GO:0048522
transmembrane transporter complex	Gene Ontology	GO:1902495	1	45	0.189626	0.54263	GRIA2	http://amigo.geneontology.org/amigo/term/GO:1902495
actin binding	Gene Ontology	GO:0003779	1	45	0.189626	0.54263	MISP	http://amigo.geneontology.org/amigo/term/GO:0003779
mitotic DNA damage checkpoint	Gene Ontology	GO:0044773	1	45	0.189626	0.54263	MUC1	http://amigo.geneontology.org/amigo/term/GO:0044773
intermediate filament cytoskeleton	Gene Ontology	GO:0045111	1	45	0.189626	0.54263	KRT37	http://amigo.geneontology.org/amigo/term/GO:0045111
regulation of cell cycle arrest	Gene Ontology	GO:0071156	1	45	0.189626	0.54263	MYOG	http://amigo.geneontology.org/amigo/term/GO:0071156
neuron projection	Gene Ontology	GO:0043005	2	173	0.19012	0.54292	GHRH|SLC6A4	http://amigo.geneontology.org/amigo/term/GO:0043005
positive regulation of cellular component organization	Gene Ontology	GO:0051130	4	491	0.190869	0.543938	SLITRK6|CALY|APOA1|METRN	http://amigo.geneontology.org/amigo/term/GO:0051130
organelle membrane	Gene Ontology	GO:0031090	4	493	0.192707	0.544457	CYP21A2|SLC6A4|SLC30A8|SPTSSB	http://amigo.geneontology.org/amigo/term/GO:0031090
positive regulation of secretion by cell	Gene Ontology	GO:1903532	1	46	0.193324	0.544457	SYT1	http://amigo.geneontology.org/amigo/term/GO:1903532
coated vesicle	Gene Ontology	GO:0030135	1	46	0.193324	0.544457	SYT1	http://amigo.geneontology.org/amigo/term/GO:0030135
negative regulation of amine transport	Gene Ontology	GO:0051953	1	46	0.193324	0.544457	CGA	http://amigo.geneontology.org/amigo/term/GO:0051953
regulation of cAMP-mediated signaling	Gene Ontology	GO:0043949	1	46	0.193324	0.544457	PEX5L	http://amigo.geneontology.org/amigo/term/GO:0043949
negative regulation of cell death	Gene Ontology	GO:0060548	2	175	0.19341	0.544457	HSH2D|DHRS2	http://amigo.geneontology.org/amigo/term/GO:0060548
response to nitrogen compound	Gene Ontology	GO:1901698	2	176	0.195058	0.547982	NEURL1|TFF1	http://amigo.geneontology.org/amigo/term/GO:1901698
regulation of protein stability	Gene Ontology	GO:0031647	1	47	0.197004	0.550102	APOA1	http://amigo.geneontology.org/amigo/term/GO:0031647
membrane microdomain	Gene Ontology	GO:0098857	1	47	0.197004	0.550102	SLC6A4	http://amigo.geneontology.org/amigo/term/GO:0098857
MAP kinase activity	Gene Ontology	GO:0004707	1	48	0.200668	0.558082	KISS1R	http://amigo.geneontology.org/amigo/term/GO:0004707
guanyl-nucleotide exchange factor activity	Gene Ontology	GO:0005085	1	48	0.200668	0.558082	FGD3	http://amigo.geneontology.org/amigo/term/GO:0005085
digestive system development	Gene Ontology	GO:0055123	1	49	0.204315	0.565952	PTK6	http://amigo.geneontology.org/amigo/term/GO:0055123
cytokine receptor binding	Gene Ontology	GO:0005126	1	49	0.204315	0.565952	GDF15	http://amigo.geneontology.org/amigo/term/GO:0005126
response to muscle activity	Gene Ontology	GO:0014850	1	50	0.207945	0.570305	MYOG	http://amigo.geneontology.org/amigo/term/GO:0014850
cilium or flagellum-dependent cell motility	Gene Ontology	GO:0001539	1	50	0.207945	0.570305	NEURL1	http://amigo.geneontology.org/amigo/term/GO:0001539
regulation of Ras protein signal transduction	Gene Ontology	GO:0046578	1	50	0.207945	0.570305	FGD3	http://amigo.geneontology.org/amigo/term/GO:0046578
epithelial cell development	Gene Ontology	GO:0002064	1	50	0.207945	0.570305	SLITRK6	http://amigo.geneontology.org/amigo/term/GO:0002064
ion channel complex	Gene Ontology	GO:0034702	1	51	0.211559	0.575837	GRIA2	http://amigo.geneontology.org/amigo/term/GO:0034702
cell leading edge	Gene Ontology	GO:0031252	1	51	0.211559	0.575837	UNC5A	http://amigo.geneontology.org/amigo/term/GO:0031252
signal transduction involved in mitotic DNA integrity checkpoint	Gene Ontology	GO:1902403	1	52	0.215157	0.583155	MUC1	http://amigo.geneontology.org/amigo/term/GO:1902403
visual system development	Gene Ontology	GO:0150063	1	52	0.215157	0.583155	PAX2	http://amigo.geneontology.org/amigo/term/GO:0150063
cartilage development	Gene Ontology	GO:0051216	1	53	0.218738	0.589401	BMPR1B	http://amigo.geneontology.org/amigo/term/GO:0051216
sensory system development	Gene Ontology	GO:0048880	1	54	0.222303	0.59553	BMPR1B	http://amigo.geneontology.org/amigo/term/GO:0048880
response to unfolded protein	Gene Ontology	GO:0006986	1	54	0.222303	0.59553	CREB3L1	http://amigo.geneontology.org/amigo/term/GO:0006986
camera-type eye development	Gene Ontology	GO:0043010	1	54	0.222303	0.59553	BMPR1B	http://amigo.geneontology.org/amigo/term/GO:0043010
retinoic acid metabolic process	Gene Ontology	GO:0042573	1	55	0.225851	0.600392	CRABP2	http://amigo.geneontology.org/amigo/term/GO:0042573
regulation of response to DNA damage stimulus	Gene Ontology	GO:2001020	1	55	0.225851	0.600392	MUC1	http://amigo.geneontology.org/amigo/term/GO:2001020
cellular response to peptide	Gene Ontology	GO:1901653	1	56	0.229384	0.607451	GNG3	http://amigo.geneontology.org/amigo/term/GO:1901653
cell cycle arrest	Gene Ontology	GO:0007050	1	57	0.2329	0.612082	MUC1	http://amigo.geneontology.org/amigo/term/GO:0007050
rhythmic process	Gene Ontology	GO:0048511	1	57	0.2329	0.612082	F7	http://amigo.geneontology.org/amigo/term/GO:0048511
RNA polymerase II-specific DNA-binding transcription factor binding	Gene Ontology	GO:0061629	1	57	0.2329	0.612082	ARNT2	http://amigo.geneontology.org/amigo/term/GO:0061629
embryonic organ development	Gene Ontology	GO:0048568	2	199	0.233352	0.612107	SLITRK6|PAX2	http://amigo.geneontology.org/amigo/term/GO:0048568
nuclear membrane	Gene Ontology	GO:0031965	1	58	0.236401	0.615086	HPN	http://amigo.geneontology.org/amigo/term/GO:0031965
phospholipid binding	Gene Ontology	GO:0005543	1	58	0.236401	0.615086	TRIM72	http://amigo.geneontology.org/amigo/term/GO:0005543
positive regulation of cell projection organization	Gene Ontology	GO:0031346	1	58	0.236401	0.615086	RET	http://amigo.geneontology.org/amigo/term/GO:0031346
focal adhesion	Gene Ontology	GO:0005925	1	58	0.236401	0.615086	MISP	http://amigo.geneontology.org/amigo/term/GO:0005925
Golgi vesicle transport	Gene Ontology	GO:0048193	1	59	0.239886	0.621331	RAB26	http://amigo.geneontology.org/amigo/term/GO:0048193
positive regulation of protein modification process	Gene Ontology	GO:0031401	3	368	0.240009	0.621331	NEURL1|MUC1|FGFR3	http://amigo.geneontology.org/amigo/term/GO:0031401
multicellular organismal homeostasis	Gene Ontology	GO:0048871	1	60	0.243354	0.624159	TFF1	http://amigo.geneontology.org/amigo/term/GO:0048871
transporter complex	Gene Ontology	GO:1990351	1	60	0.243354	0.624159	CACNA1H	http://amigo.geneontology.org/amigo/term/GO:1990351
lung development	Gene Ontology	GO:0030324	1	61	0.246807	0.62836	AGR2	http://amigo.geneontology.org/amigo/term/GO:0030324
regulation of cytokine-mediated signaling pathway	Gene Ontology	GO:0001959	1	61	0.246807	0.62836	PYDC1	http://amigo.geneontology.org/amigo/term/GO:0001959
guanyl ribonucleotide binding	Gene Ontology	GO:0032561	1	61	0.246807	0.62836	EEF1A2	http://amigo.geneontology.org/amigo/term/GO:0032561
response to auditory stimulus	Gene Ontology	GO:0010996	1	62	0.250245	0.634778	SLITRK6	http://amigo.geneontology.org/amigo/term/GO:0010996
endomembrane system organization	Gene Ontology	GO:0010256	1	62	0.250245	0.634778	TRIM72	http://amigo.geneontology.org/amigo/term/GO:0010256
response to starvation	Gene Ontology	GO:0042594	1	63	0.253666	0.639941	SSTR2	http://amigo.geneontology.org/amigo/term/GO:0042594
activation of protein kinase activity	Gene Ontology	GO:0032147	2	212	0.255204	0.640321	KISS1R|MAPK8IP2	http://amigo.geneontology.org/amigo/term/GO:0032147
nucleoside-triphosphatase activity	Gene Ontology	GO:0017111	2	212	0.255204	0.640321	EEF1A2|KIFC2	http://amigo.geneontology.org/amigo/term/GO:0017111
cellular response to oxygen-containing compound	Gene Ontology	GO:1901701	4	559	0.256038	0.641199	NEURL1|CYP21A2|HTR1E|PAX2	http://amigo.geneontology.org/amigo/term/GO:1901701
nucleoside binding	Gene Ontology	GO:0001882	1	64	0.257072	0.641199	EEF1A2	http://amigo.geneontology.org/amigo/term/GO:0001882
monovalent inorganic cation transmembrane transporter activity	Gene Ontology	GO:0015077	1	64	0.257072	0.641199	KCNF1	http://amigo.geneontology.org/amigo/term/GO:0015077
nitrogen compound metabolic process	Gene Ontology	GO:0006807	16	2898	0.257405	0.641199	SERPINA12|KISS1R|TGM3|CST5|AMZ1|F7|SERPINA9|CFB|RHBDL1|BMPR1B|PAH|SLC44A4|SPTSSB|FGFR3|DUSP13|WFDC6	http://amigo.geneontology.org/amigo/term/GO:0006807
multi-multicellular organism process	Gene Ontology	GO:0044706	1	65	0.260463	0.641888	MUC1	http://amigo.geneontology.org/amigo/term/GO:0044706
cis-regulatory region binding	Gene Ontology	GO:0035326	1	65	0.260463	0.641888	MUC1	http://amigo.geneontology.org/amigo/term/GO:0035326
positive regulation of establishment of protein localization	Gene Ontology	GO:1904951	1	65	0.260463	0.641888	LRRC46	http://amigo.geneontology.org/amigo/term/GO:1904951
regulation of autophagy	Gene Ontology	GO:0010506	1	65	0.260463	0.641888	EEF1A2	http://amigo.geneontology.org/amigo/term/GO:0010506
guanyl nucleotide binding	Gene Ontology	GO:0019001	1	65	0.260463	0.641888	EEF1A2	http://amigo.geneontology.org/amigo/term/GO:0019001
molecular transducer activity	Gene Ontology	GO:0060089	2	217	0.263623	0.645611	CACNG4|FGFR3	http://amigo.geneontology.org/amigo/term/GO:0060089
receptor ligand activity	Gene Ontology	GO:0048018	1	66	0.263838	0.645611	IL20	http://amigo.geneontology.org/amigo/term/GO:0048018
response to endoplasmic reticulum stress	Gene Ontology	GO:0034976	1	66	0.263838	0.645611	AGR2	http://amigo.geneontology.org/amigo/term/GO:0034976
innate immune response in mucosa	Gene Ontology	GO:0002227	1	66	0.263838	0.645611	BPIFB1	http://amigo.geneontology.org/amigo/term/GO:0002227
regulation of developmental growth	Gene Ontology	GO:0048638	1	67	0.267198	0.650385	SYT1	http://amigo.geneontology.org/amigo/term/GO:0048638
glycerophospholipid metabolic process	Gene Ontology	GO:0006650	1	68	0.270543	0.655073	SLC44A4	http://amigo.geneontology.org/amigo/term/GO:0006650
positive regulation of hormone secretion	Gene Ontology	GO:0046887	1	68	0.270543	0.655073	KISS1R	http://amigo.geneontology.org/amigo/term/GO:0046887
cellular protein metabolic process	Gene Ontology	GO:0044267	6	949	0.271079	0.655227	SERPINA12|KISS1R|PYDC1|GNG3|GPRC5A|HPN	http://amigo.geneontology.org/amigo/term/GO:0044267
transition metal ion homeostasis	Gene Ontology	GO:0055076	1	69	0.273872	0.659674	TMPRSS6	http://amigo.geneontology.org/amigo/term/GO:0055076
signaling receptor activator activity	Gene Ontology	GO:0030546	1	70	0.277186	0.666498	APOA1	http://amigo.geneontology.org/amigo/term/GO:0030546
negative regulation of cell communication	Gene Ontology	GO:0010648	2	226	0.278778	0.668627	NEURL1|PYDC1	http://amigo.geneontology.org/amigo/term/GO:0010648
hydrolase activity, acting on acid anhydrides, in phosphorus-containing anhydrides	Gene Ontology	GO:0016818	2	227	0.280461	0.668627	GNG3|RET	http://amigo.geneontology.org/amigo/term/GO:0016818
positive regulation of cell death	Gene Ontology	GO:0010942	2	227	0.280461	0.668627	BMPR1B|PYDC1	http://amigo.geneontology.org/amigo/term/GO:0010942
biomineral tissue development	Gene Ontology	GO:0031214	1	71	0.280485	0.668627	BMPR1B	http://amigo.geneontology.org/amigo/term/GO:0031214
transmembrane receptor protein serine/threonine kinase signaling pathway	Gene Ontology	GO:0007178	1	71	0.280485	0.668627	TMPRSS6	http://amigo.geneontology.org/amigo/term/GO:0007178
negative regulation of cellular process	Gene Ontology	GO:0048523	6	965	0.283476	0.674135	SERPINA12|SLC6A4|SERPINA9|NAT1|TMPRSS6|FOXH1	http://amigo.geneontology.org/amigo/term/GO:0048523
microtubule	Gene Ontology	GO:0005874	1	72	0.28377	0.674135	TUBA3E	http://amigo.geneontology.org/amigo/term/GO:0005874
morphogenesis of embryonic epithelium	Gene Ontology	GO:0016331	1	73	0.287039	0.676457	RET	http://amigo.geneontology.org/amigo/term/GO:0016331
positive regulation of peptide hormone secretion	Gene Ontology	GO:0090277	1	73	0.287039	0.676457	GHRH	http://amigo.geneontology.org/amigo/term/GO:0090277
cellular protein-containing complex assembly	Gene Ontology	GO:0034622	2	231	0.287189	0.676457	CALY|CCDC151	http://amigo.geneontology.org/amigo/term/GO:0034622
regulation of cell growth	Gene Ontology	GO:0001558	1	74	0.290293	0.680298	CRABP2	http://amigo.geneontology.org/amigo/term/GO:0001558
glycosylation	Gene Ontology	GO:0070085	1	74	0.290293	0.680298	MUC1	http://amigo.geneontology.org/amigo/term/GO:0070085
cytoplasmic vesicle membrane	Gene Ontology	GO:0030659	1	75	0.293533	0.682957	SYT1	http://amigo.geneontology.org/amigo/term/GO:0030659
phospholipid biosynthetic process	Gene Ontology	GO:0008654	1	75	0.293533	0.682957	APOA1	http://amigo.geneontology.org/amigo/term/GO:0008654
response to toxic substance	Gene Ontology	GO:0009636	3	412	0.293893	0.682957	TRH|SLC6A4|PAX2	http://amigo.geneontology.org/amigo/term/GO:0009636
metal ion transmembrane transporter activity	Gene Ontology	GO:0046873	1	77	0.299968	0.693582	HPN	http://amigo.geneontology.org/amigo/term/GO:0046873
regulation of intracellular protein transport	Gene Ontology	GO:0033157	1	77	0.299968	0.693582	LRRC46	http://amigo.geneontology.org/amigo/term/GO:0033157
Ras GTPase binding	Gene Ontology	GO:0017016	1	77	0.299968	0.693582	FGD3	http://amigo.geneontology.org/amigo/term/GO:0017016
kinase activity	Gene Ontology	GO:0016301	2	241	0.303977	0.700512	EEF1A2|DOK7	http://amigo.geneontology.org/amigo/term/GO:0016301
cellular macromolecule localization	Gene Ontology	GO:0070727	2	241	0.303977	0.700512	PEX5L|RAB26	http://amigo.geneontology.org/amigo/term/GO:0070727
regulation of cellular component biogenesis	Gene Ontology	GO:0044087	3	421	0.305041	0.701796	CGA|LRRC24|CLRN1	http://amigo.geneontology.org/amigo/term/GO:0044087
ATP binding	Gene Ontology	GO:0005524	2	242	0.305652	0.702036	BMPR1B|SRMS	http://amigo.geneontology.org/amigo/term/GO:0005524
signaling receptor binding	Gene Ontology	GO:0005102	2	243	0.307326	0.703549	AGR2|TFF1	http://amigo.geneontology.org/amigo/term/GO:0005102
positive regulation of multi-organism process	Gene Ontology	GO:0043902	1	80	0.309511	0.706216	HPN	http://amigo.geneontology.org/amigo/term/GO:0043902
organ or tissue specific immune response	Gene Ontology	GO:0002251	1	82	0.315801	0.719382	BPIFB1	http://amigo.geneontology.org/amigo/term/GO:0002251
intracellular membrane-bounded organelle	Gene Ontology	GO:0043231	9	1606	0.317718	0.719399	KISS1R|TUBA3E|F7|AGR3|DHRS2|PARD6B|RHBDL1|PAX2|COX6C	http://amigo.geneontology.org/amigo/term/GO:0043231
heterocyclic compound binding	Gene Ontology	GO:1901363	5	813	0.317863	0.719399	HYPM|NAT1|HOXB1|CYP2A7|ARNT2	http://amigo.geneontology.org/amigo/term/GO:1901363
lytic vacuole	Gene Ontology	GO:0000323	1	83	0.318925	0.719399	CGA	http://amigo.geneontology.org/amigo/term/GO:0000323
microtubule bundle formation	Gene Ontology	GO:0001578	1	83	0.318925	0.719399	DNAAF3	http://amigo.geneontology.org/amigo/term/GO:0001578
regulation of protein catabolic process	Gene Ontology	GO:0042176	1	83	0.318925	0.719399	MAPK15	http://amigo.geneontology.org/amigo/term/GO:0042176
negative regulation of response to external stimulus	Gene Ontology	GO:0032102	2	251	0.320692	0.721711	ROBO2|TMPRSS6	http://amigo.geneontology.org/amigo/term/GO:0032102
cofactor binding	Gene Ontology	GO:0048037	1	84	0.322034	0.721711	CYP21A2	http://amigo.geneontology.org/amigo/term/GO:0048037
negative regulation of phosphorylation	Gene Ontology	GO:0042326	1	84	0.322034	0.721711	MYOG	http://amigo.geneontology.org/amigo/term/GO:0042326
morphogenesis of a branching structure	Gene Ontology	GO:0001763	1	84	0.322034	0.721711	PAX2	http://amigo.geneontology.org/amigo/term/GO:0001763
ion channel activity	Gene Ontology	GO:0005216	1	85	0.325129	0.72747	CALHM1	http://amigo.geneontology.org/amigo/term/GO:0005216
regulation of translation	Gene Ontology	GO:0006417	1	86	0.32821	0.731999	EIF4E1B	http://amigo.geneontology.org/amigo/term/GO:0006417
endomembrane system	Gene Ontology	GO:0012505	4	633	0.331056	0.736468	GRIA2|CYP2A13|SPPL2C|F7	http://amigo.geneontology.org/amigo/term/GO:0012505
mitochondrial inner membrane	Gene Ontology	GO:0005743	1	87	0.331278	0.736468	RHBDL1	http://amigo.geneontology.org/amigo/term/GO:0005743
extracellular organelle	Gene Ontology	GO:0043230	3	444	0.333585	0.739694	BPIFB1|GP2|TFF3	http://amigo.geneontology.org/amigo/term/GO:0043230
anterograde trans-synaptic signaling	Gene Ontology	GO:0098916	1	88	0.334331	0.739694	LRFN2	http://amigo.geneontology.org/amigo/term/GO:0098916
positive regulation of angiogenesis	Gene Ontology	GO:0045766	1	88	0.334331	0.739694	LRG1	http://amigo.geneontology.org/amigo/term/GO:0045766
cellular response to organic substance	Gene Ontology	GO:0071310	7	1230	0.335147	0.740316	TRIM72|SLC6A4|CYP21A2|NEURL1|HTR1E|GDF15|APOA1	http://amigo.geneontology.org/amigo/term/GO:0071310
cell-cell junction	Gene Ontology	GO:0005911	1	89	0.33737	0.742858	STARD10	http://amigo.geneontology.org/amigo/term/GO:0005911
adenyl nucleotide binding	Gene Ontology	GO:0030554	2	262	0.338965	0.743609	FGFR3|ENTPD8	http://amigo.geneontology.org/amigo/term/GO:0030554
regulation of animal organ morphogenesis	Gene Ontology	GO:2000027	1	90	0.340396	0.743609	HPN	http://amigo.geneontology.org/amigo/term/GO:2000027
RNA polymerase II regulatory region DNA binding	Gene Ontology	GO:0001012	1	90	0.340396	0.743609	ARNT2	http://amigo.geneontology.org/amigo/term/GO:0001012
negative regulation of reproductive process	Gene Ontology	GO:2000242	1	91	0.343407	0.746655	AMH	http://amigo.geneontology.org/amigo/term/GO:2000242
perinuclear region of cytoplasm	Gene Ontology	GO:0048471	1	91	0.343407	0.746655	CCDC78	http://amigo.geneontology.org/amigo/term/GO:0048471
negative regulation of intracellular signal transduction	Gene Ontology	GO:1902532	1	92	0.346405	0.751993	CREB3L1	http://amigo.geneontology.org/amigo/term/GO:1902532
phospholipid metabolic process	Gene Ontology	GO:0006644	1	93	0.34939	0.757285	PNLIPRP2	http://amigo.geneontology.org/amigo/term/GO:0006644
organ growth	Gene Ontology	GO:0035265	1	94	0.352361	0.760584	FGFR3	http://amigo.geneontology.org/amigo/term/GO:0035265
peptidyl-lysine modification	Gene Ontology	GO:0018205	1	94	0.352361	0.760584	MUC1	http://amigo.geneontology.org/amigo/term/GO:0018205
response to chemical	Gene Ontology	GO:0042221	12	2278	0.35256	0.760584	SLC6A4|CYP2A13|EEF1A2|AGR2|PYDC1|EMX1|CGA|BMPR1B|RET|GDF15|AKR7A3|MYOG	http://amigo.geneontology.org/amigo/term/GO:0042221
metal ion binding	Gene Ontology	GO:0046872	4	657	0.355752	0.766278	PAH|NEURL1|ZDHHC22|DNASE1L2	http://amigo.geneontology.org/amigo/term/GO:0046872
positive regulation of transcription, DNA-templated	Gene Ontology	GO:0045893	2	273	0.357085	0.767955	FOXH1|CREB3L1	http://amigo.geneontology.org/amigo/term/GO:0045893
positive regulation of catabolic process	Gene Ontology	GO:0009896	1	97	0.361192	0.773186	APOA1	http://amigo.geneontology.org/amigo/term/GO:0009896
regulation of carbohydrate metabolic process	Gene Ontology	GO:0006109	1	97	0.361192	0.773186	SERPINA12	http://amigo.geneontology.org/amigo/term/GO:0006109
phosphatidylinositol-mediated signaling	Gene Ontology	GO:0048015	2	276	0.361997	0.773713	SERPINA12|FGFR3	http://amigo.geneontology.org/amigo/term/GO:0048015
cell fate commitment	Gene Ontology	GO:0045165	1	98	0.364109	0.775833	PAX2	http://amigo.geneontology.org/amigo/term/GO:0045165
positive regulation of apoptotic signaling pathway	Gene Ontology	GO:2001235	1	98	0.364109	0.775833	BMPR1B	http://amigo.geneontology.org/amigo/term/GO:2001235
transcription regulator activity	Gene Ontology	GO:0140110	2	278	0.365264	0.776397	AMH|MYT1	http://amigo.geneontology.org/amigo/term/GO:0140110
pituitary gland development	Gene Ontology	GO:0021983	1	99	0.367013	0.776397	GHRH	http://amigo.geneontology.org/amigo/term/GO:0021983
plasma membrane bounded cell projection morphogenesis	Gene Ontology	GO:0120039	1	99	0.367013	0.776397	SYT1	http://amigo.geneontology.org/amigo/term/GO:0120039
regulation of metabolic process	Gene Ontology	GO:0019222	6	1070	0.367177	0.776397	PTK6|SERPINA9|AGR2|EMX1|HYPM|CREB3L1	http://amigo.geneontology.org/amigo/term/GO:0019222
cellular response to acid chemical	Gene Ontology	GO:0071229	1	100	0.369904	0.778597	MYOG	http://amigo.geneontology.org/amigo/term/GO:0071229
nucleoside monophosphate metabolic process	Gene Ontology	GO:0009123	1	100	0.369904	0.778597	ENTPD8	http://amigo.geneontology.org/amigo/term/GO:0009123
positive regulation of peptide secretion	Gene Ontology	GO:0002793	1	101	0.372781	0.782276	TRH	http://amigo.geneontology.org/amigo/term/GO:0002793
response to endogenous stimulus	Gene Ontology	GO:0009719	5	876	0.374339	0.784356	SERPINA12|HTR1E|LRG1|SSTR2|CALY	http://amigo.geneontology.org/amigo/term/GO:0009719
anatomical structure morphogenesis	Gene Ontology	GO:0009653	9	1697	0.375788	0.786203	TGM3|KCNH1|KRT35|TMPRSS6|EMX1|LRFN2|TNNI3|OTOR|GDF15	http://amigo.geneontology.org/amigo/term/GO:0009653
cellular response to nitrogen compound	Gene Ontology	GO:1901699	1	103	0.378497	0.790677	GNG13	http://amigo.geneontology.org/amigo/term/GO:1901699
apoptotic signaling pathway	Gene Ontology	GO:0097190	2	287	0.379883	0.791185	MUC1|FGFR3	http://amigo.geneontology.org/amigo/term/GO:0097190
positive regulation of nucleobase-containing compound metabolic process	Gene Ontology	GO:0045935	2	287	0.379883	0.791185	CREB3L1|TMPRSS6	http://amigo.geneontology.org/amigo/term/GO:0045935
blood vessel endothelial cell migration	Gene Ontology	GO:0043534	1	105	0.384161	0.796502	APOA1	http://amigo.geneontology.org/amigo/term/GO:0043534
regulation of myoblast fusion	Gene Ontology	GO:1901739	1	105	0.384161	0.796502	GDF15	http://amigo.geneontology.org/amigo/term/GO:1901739
kinase binding	Gene Ontology	GO:0019900	1	105	0.384161	0.796502	EEF1A2	http://amigo.geneontology.org/amigo/term/GO:0019900
hormone-mediated signaling pathway	Gene Ontology	GO:0009755	1	106	0.386974	0.798746	TRH	http://amigo.geneontology.org/amigo/term/GO:0009755
purine ribonucleotide binding	Gene Ontology	GO:0032555	2	292	0.387944	0.799557	TUBA3E|RAB26	http://amigo.geneontology.org/amigo/term/GO:0032555
negative regulation of catalytic activity	Gene Ontology	GO:0043086	5	892	0.38873	0.799987	SERPINA12|SERPINA9|CSTL1|GPRC5A|APOA1	http://amigo.geneontology.org/amigo/term/GO:0043086
sequence-specific double-stranded DNA binding	Gene Ontology	GO:1990837	1	109	0.395335	0.809969	MUC1	http://amigo.geneontology.org/amigo/term/GO:1990837
enzyme linked receptor protein signaling pathway	Gene Ontology	GO:0007167	2	300	0.400744	0.81643	PTK6|F7	http://amigo.geneontology.org/amigo/term/GO:0007167
mitochondrial membrane	Gene Ontology	GO:0031966	1	111	0.400846	0.81643	COX6C	http://amigo.geneontology.org/amigo/term/GO:0031966
process utilizing autophagic mechanism	Gene Ontology	GO:0061919	1	111	0.400846	0.81643	EEF1A2	http://amigo.geneontology.org/amigo/term/GO:0061919
bone mineralization	Gene Ontology	GO:0030282	1	111	0.400846	0.81643	FGFR3	http://amigo.geneontology.org/amigo/term/GO:0030282
nucleic acid binding	Gene Ontology	GO:0003676	3	501	0.403838	0.818911	DNASE1L2|HOXB1|NAT1	http://amigo.geneontology.org/amigo/term/GO:0003676
skeletal system morphogenesis	Gene Ontology	GO:0048705	1	113	0.406307	0.822713	HOXB1	http://amigo.geneontology.org/amigo/term/GO:0048705
transferase complex	Gene Ontology	GO:1990234	1	115	0.411719	0.832453	PYDC1	http://amigo.geneontology.org/amigo/term/GO:1990234
organophosphate biosynthetic process	Gene Ontology	GO:0090407	1	117	0.417081	0.842066	APOA1	http://amigo.geneontology.org/amigo/term/GO:0090407
tube development	Gene Ontology	GO:0035295	2	311	0.418137	0.842968	TNNI3|PTK6	http://amigo.geneontology.org/amigo/term/GO:0035295
posttranscriptional regulation of gene expression	Gene Ontology	GO:0010608	1	118	0.419744	0.844979	EIF4E1B	http://amigo.geneontology.org/amigo/term/GO:0010608
protein localization to membrane	Gene Ontology	GO:0072657	1	119	0.422395	0.846623	ZDHHC22	http://amigo.geneontology.org/amigo/term/GO:0072657
purine nucleotide binding	Gene Ontology	GO:0017076	2	315	0.424398	0.84941	KIFC2|ENTPD8	http://amigo.geneontology.org/amigo/term/GO:0017076
response to oxygen levels	Gene Ontology	GO:0070482	2	316	0.425958	0.850075	TRH|ARNT2	http://amigo.geneontology.org/amigo/term/GO:0070482
positive regulation of gene expression	Gene Ontology	GO:0010628	2	317	0.427516	0.851019	BMPR1B|SLC6A4	http://amigo.geneontology.org/amigo/term/GO:0010628
G protein-coupled receptor activity	Gene Ontology	GO:0004930	1	121	0.42766	0.851019	HTR1E	http://amigo.geneontology.org/amigo/term/GO:0004930
head development	Gene Ontology	GO:0060322	1	122	0.430275	0.854993	ARNT2	http://amigo.geneontology.org/amigo/term/GO:0060322
negative regulation of biological process	Gene Ontology	GO:0048519	6	1152	0.433455	0.860078	FAM57B|KISS1R|TFF1|TMPRSS6|CST9|CREB3L1	http://amigo.geneontology.org/amigo/term/GO:0048519
synapse	Gene Ontology	GO:0045202	1	128	0.445715	0.883141	LRFN2	http://amigo.geneontology.org/amigo/term/GO:0045202
carbohydrate derivative biosynthetic process	Gene Ontology	GO:1901137	1	129	0.448248	0.885625	BMPR1B	http://amigo.geneontology.org/amigo/term/GO:1901137
response to oxygen-containing compound	Gene Ontology	GO:1901700	5	960	0.449464	0.886461	TFF1|SSTR2|PTK6|GNG3|TRIM72	http://amigo.geneontology.org/amigo/term/GO:1901700
cellular metabolic process	Gene Ontology	GO:0044237	10	2027	0.450963	0.886461	TRH|DEGS2|KCNH1|PTK6|CYP2A13|CST9L|PYDC1|MAPK15|SPPL2C|FGFR3	http://amigo.geneontology.org/amigo/term/GO:0044237
programmed cell death	Gene Ontology	GO:0012501	5	962	0.451231	0.886461	NEURL1|EEF1A2|ROBO2|HSH2D|UNC5A	http://amigo.geneontology.org/amigo/term/GO:0012501
translational elongation	Gene Ontology	GO:0006414	1	131	0.453278	0.887834	EEF1A2	http://amigo.geneontology.org/amigo/term/GO:0006414
stress-activated MAPK cascade	Gene Ontology	GO:0051403	1	131	0.453278	0.887834	MAPK8IP2	http://amigo.geneontology.org/amigo/term/GO:0051403
regulation of cation channel activity	Gene Ontology	GO:2001257	2	335	0.455167	0.887834	CACNG4|MAPK8IP2	http://amigo.geneontology.org/amigo/term/GO:2001257
cellular response to steroid hormone stimulus	Gene Ontology	GO:0071383	1	132	0.455776	0.887834	SSTR2	http://amigo.geneontology.org/amigo/term/GO:0071383
glycerolipid biosynthetic process	Gene Ontology	GO:0045017	1	132	0.455776	0.887834	APOA1	http://amigo.geneontology.org/amigo/term/GO:0045017
response to extracellular stimulus	Gene Ontology	GO:0009991	4	759	0.459596	0.89236	PYY|PRLH|APOA1|F7	http://amigo.geneontology.org/amigo/term/GO:0009991
viral gene expression	Gene Ontology	GO:0019080	1	134	0.460738	0.89236	HPN	http://amigo.geneontology.org/amigo/term/GO:0019080
neural precursor cell proliferation	Gene Ontology	GO:0061351	1	134	0.460738	0.89236	SLC6A4	http://amigo.geneontology.org/amigo/term/GO:0061351
regulation of nucleic acid-templated transcription	Gene Ontology	GO:1903506	3	549	0.461321	0.89236	AMH|MYOG|TMPRSS6	http://amigo.geneontology.org/amigo/term/GO:1903506
cellular biosynthetic process	Gene Ontology	GO:0044249	9	1833	0.46371	0.895731	FAM57B|CYP21A2|MUC1|PYDC1|EMX1|CREB3L1|HS6ST3|GSTA3|APOA1	http://amigo.geneontology.org/amigo/term/GO:0044249
cell maturation	Gene Ontology	GO:0048469	1	141	0.477754	0.920291	RET	http://amigo.geneontology.org/amigo/term/GO:0048469
intracellular organelle	Gene Ontology	GO:0043229	9	1863	0.48292	0.927662	TRH|FGD3|KRT35|KRT37|TNNI3|KLHL1|CACNG4|ARNT2|COX6C	http://amigo.geneontology.org/amigo/term/GO:0043229
transcription regulatory region DNA binding	Gene Ontology	GO:0044212	1	144	0.484881	0.928853	MYOG	http://amigo.geneontology.org/amigo/term/GO:0044212
specification of symmetry	Gene Ontology	GO:0009799	1	144	0.484881	0.928853	CCDC151	http://amigo.geneontology.org/amigo/term/GO:0009799
forebrain generation of neurons	Gene Ontology	GO:0021872	1	146	0.489579	0.935265	ROBO2	http://amigo.geneontology.org/amigo/term/GO:0021872
metabolic process	Gene Ontology	GO:0008152	12	2527	0.49066	0.936038	AMH|AMZ1|HOXB1|PRLH|SRMS|GNG3|MYT1|SPTSSB|MYOG|FGFR3|DUSP13|HPN	http://amigo.geneontology.org/amigo/term/GO:0008152
regulation of anatomical structure size	Gene Ontology	GO:0090066	1	148	0.494234	0.940178	PYDC1	http://amigo.geneontology.org/amigo/term/GO:0090066
regulation of catalytic activity	Gene Ontology	GO:0050790	5	1012	0.494866	0.940178	KISS1R|CST9|CST9L|CST5|SERPINA9	http://amigo.geneontology.org/amigo/term/GO:0050790
cellular component organization	Gene Ontology	GO:0016043	8	1670	0.498747	0.943857	SYT9|CRABP2|SYT13|SLC6A4|PYDC1|NEURL1|KLHL1|CLRN1	http://amigo.geneontology.org/amigo/term/GO:0016043
response to transforming growth factor beta	Gene Ontology	GO:0071559	1	150	0.498847	0.943857	FOXH1	http://amigo.geneontology.org/amigo/term/GO:0071559
cellular response to growth factor stimulus	Gene Ontology	GO:0071363	1	151	0.501138	0.946898	FOXH1	http://amigo.geneontology.org/amigo/term/GO:0071363
ameboidal-type cell migration	Gene Ontology	GO:0001667	1	155	0.510197	0.960085	APOA1	http://amigo.geneontology.org/amigo/term/GO:0001667
adenylate cyclase-modulating G protein-coupled receptor signaling pathway	Gene Ontology	GO:0007188	1	157	0.514665	0.966858	GHRH	http://amigo.geneontology.org/amigo/term/GO:0007188
regulation of transferase activity	Gene Ontology	GO:0051338	3	596	0.515192	0.966858	GRM4|GNG3|PYDC1	http://amigo.geneontology.org/amigo/term/GO:0051338
nucleotide binding	Gene Ontology	GO:0000166	2	377	0.516572	0.968135	FGFR3|RAB26	http://amigo.geneontology.org/amigo/term/GO:0000166
response to acid chemical	Gene Ontology	GO:0001101	2	380	0.520781	0.974704	PTK6|PAX2	http://amigo.geneontology.org/amigo/term/GO:0001101
blood vessel development	Gene Ontology	GO:0001568	2	381	0.522178	0.976001	LRG1|RAMP1	http://amigo.geneontology.org/amigo/term/GO:0001568
nuclear lumen	Gene Ontology	GO:0031981	3	603	0.522971	0.976166	PTK6|IGFALS|MYT1	http://amigo.geneontology.org/amigo/term/GO:0031981
cellular response to retinoic acid	Gene Ontology	GO:0071300	1	164	0.529985	0.985273	SLC6A4	http://amigo.geneontology.org/amigo/term/GO:0071300
organelle envelope	Gene Ontology	GO:0031967	1	165	0.532134	0.987942	KCNH1	http://amigo.geneontology.org/amigo/term/GO:0031967
nucleic acid-templated transcription	Gene Ontology	GO:0097659	3	612	0.532873	0.98799	MYOG|TMPRSS6|EMX1	http://amigo.geneontology.org/amigo/term/GO:0097659
microtubule cytoskeleton	Gene Ontology	GO:0015630	1	167	0.536402	0.991878	ZMYND10	http://amigo.geneontology.org/amigo/term/GO:0015630
positive regulation of developmental process	Gene Ontology	GO:0051094	5	1062	0.53717	0.991974	GDF15|GHRH|HPN|CRABP2|PTK6	http://amigo.geneontology.org/amigo/term/GO:0051094
peptidase activity	Gene Ontology	GO:0008233	1	169	0.540632	0.995711	SPINK4	http://amigo.geneontology.org/amigo/term/GO:0008233
epithelium development	Gene Ontology	GO:0060429	3	620	0.541577	0.996127	MUC1|ROBO2|PTK6	http://amigo.geneontology.org/amigo/term/GO:0060429
negative regulation of nucleic acid-templated transcription	Gene Ontology	GO:1903507	1	171	0.544823	0.999443	MUC1	http://amigo.geneontology.org/amigo/term/GO:1903507
negative regulation of metabolic process	Gene Ontology	GO:0009892	6	1296	0.545989	1	MUC1|TMPRSS6|HYPM|PYDC1|PAX2|SPINK4	http://amigo.geneontology.org/amigo/term/GO:0009892
macromolecule modification	Gene Ontology	GO:0043412	4	852	0.548975	1	RAMP1|TRIM72|PYDC1|FGFR3	http://amigo.geneontology.org/amigo/term/GO:0043412
macromolecule metabolic process	Gene Ontology	GO:0043170	12	2637	0.550258	1	TGM3|PTK6|DNASE1L2|HOXB1|PYDC1|BMPR1B|CPB1|GRM4|FOXH1|GPRC5A|APOA1|ARNT2	http://amigo.geneontology.org/amigo/term/GO:0043170
positive regulation of cellular metabolic process	Gene Ontology	GO:0031325	3	630	0.552325	1	GDF15|RAMP1|DOK7	http://amigo.geneontology.org/amigo/term/GO:0031325
cellular response to organic cyclic compound	Gene Ontology	GO:0071407	1	175	0.553091	1	SLC6A4	http://amigo.geneontology.org/amigo/term/GO:0071407
negative regulation of programmed cell death	Gene Ontology	GO:0043069	1	176	0.555135	1	HSH2D	http://amigo.geneontology.org/amigo/term/GO:0043069
regionalization	Gene Ontology	GO:0003002	1	177	0.557169	1	HOXB1	http://amigo.geneontology.org/amigo/term/GO:0003002
epidermal cell differentiation	Gene Ontology	GO:0009913	1	178	0.559194	1	SLITRK6	http://amigo.geneontology.org/amigo/term/GO:0009913
protein-containing complex subunit organization	Gene Ontology	GO:0043933	2	410	0.561505	1	APOA1|PYDC1	http://amigo.geneontology.org/amigo/term/GO:0043933
protein-containing complex	Gene Ontology	GO:0032991	3	639	0.56187	1	CACNA1H|MYOG|PAX2	http://amigo.geneontology.org/amigo/term/GO:0032991
regulation of cellular protein metabolic process	Gene Ontology	GO:0032268	2	412	0.564131	1	MUC1|DOK7	http://amigo.geneontology.org/amigo/term/GO:0032268
positive regulation of metabolic process	Gene Ontology	GO:0009893	3	642	0.565025	1	MAPK15|GDF15|RET	http://amigo.geneontology.org/amigo/term/GO:0009893
sulfur compound metabolic process	Gene Ontology	GO:0006790	1	182	0.567203	1	GSTA3	http://amigo.geneontology.org/amigo/term/GO:0006790
intracellular protein transport	Gene Ontology	GO:0006886	1	183	0.569182	1	RAMP1	http://amigo.geneontology.org/amigo/term/GO:0006886
cellular component disassembly	Gene Ontology	GO:0022411	1	184	0.571153	1	CLGN	http://amigo.geneontology.org/amigo/term/GO:0022411
catalytic complex	Gene Ontology	GO:1902494	1	184	0.571153	1	PYDC1	http://amigo.geneontology.org/amigo/term/GO:1902494
membrane protein complex	Gene Ontology	GO:0098796	1	186	0.575066	1	GRIA2	http://amigo.geneontology.org/amigo/term/GO:0098796
regulation of programmed cell death	Gene Ontology	GO:0043067	4	882	0.576143	1	GRM4|DHRS2|ARNT2|PAX2	http://amigo.geneontology.org/amigo/term/GO:0043067
supramolecular complex	Gene Ontology	GO:0099080	1	188	0.578945	1	KIFC2	http://amigo.geneontology.org/amigo/term/GO:0099080
regulation of cell death	Gene Ontology	GO:0010941	4	888	0.581466	1	GRM4|CEACAM5|TNFRSF18|ARNT2	http://amigo.geneontology.org/amigo/term/GO:0010941
positive regulation of transferase activity	Gene Ontology	GO:0051347	3	661	0.58468	1	GNG3|MAPK8IP2|FGFR3	http://amigo.geneontology.org/amigo/term/GO:0051347
response to abiotic stimulus	Gene Ontology	GO:0009628	1	193	0.588487	1	EEF1A2	http://amigo.geneontology.org/amigo/term/GO:0009628
cellular macromolecule metabolic process	Gene Ontology	GO:0044260	12	2713	0.589971	1	TGM3|KCNH1|SERPINA9|EEF1A2|HOXB1|RET|HYPM|MAPK15|CLGN|TMPRSS6|GDF15|DNASE1L2	http://amigo.geneontology.org/amigo/term/GO:0044260
ribose phosphate metabolic process	Gene Ontology	GO:0019693	1	196	0.594108	1	MYOG	http://amigo.geneontology.org/amigo/term/GO:0019693
macromolecule localization	Gene Ontology	GO:0033036	2	440	0.599705	1	KISS1R|LCN12	http://amigo.geneontology.org/amigo/term/GO:0033036
morphogenesis of an epithelium	Gene Ontology	GO:0002009	3	680	0.603763	1	TGM3|FOXH1|RET	http://amigo.geneontology.org/amigo/term/GO:0002009
regulation of small GTPase mediated signal transduction	Gene Ontology	GO:0051056	1	202	0.605123	1	FGD3	http://amigo.geneontology.org/amigo/term/GO:0051056
negative regulation of phosphate metabolic process	Gene Ontology	GO:0045936	1	203	0.606929	1	PTK6	http://amigo.geneontology.org/amigo/term/GO:0045936
outer dynein arm assembly	Gene Ontology	GO:0036158	1	206	0.6123	1	CCDC151	http://amigo.geneontology.org/amigo/term/GO:0036158
skeletal system development	Gene Ontology	GO:0001501	1	206	0.6123	1	HOXB1	http://amigo.geneontology.org/amigo/term/GO:0001501
hydrolase activity, acting on acid anhydrides	Gene Ontology	GO:0016817	1	206	0.6123	1	TUBA3E	http://amigo.geneontology.org/amigo/term/GO:0016817
anion binding	Gene Ontology	GO:0043168	2	454	0.616659	1	RET|ENTPD8	http://amigo.geneontology.org/amigo/term/GO:0043168
cell differentiation	Gene Ontology	GO:0030154	9	2091	0.621195	1	TRIM72|METRN|SYT1|PRLH|PARD6B|BMPR1B|CEACAM5|APOA1|MAPK8IP2	http://amigo.geneontology.org/amigo/term/GO:0030154
lipid metabolic process	Gene Ontology	GO:0006629	6	1403	0.622818	1	SLC44A4|CRABP2|CYP2A13|EEF1A2|PRLH|SPTSSB	http://amigo.geneontology.org/amigo/term/GO:0006629
response to hormone	Gene Ontology	GO:0009725	4	938	0.624294	1	SERPINA12|CYP21A2|FOXH1|ARNT2	http://amigo.geneontology.org/amigo/term/GO:0009725
negative regulation of phosphorus metabolic process	Gene Ontology	GO:0010563	1	214	0.626266	1	PYDC1	http://amigo.geneontology.org/amigo/term/GO:0010563
Golgi apparatus	Gene Ontology	GO:0005794	1	216	0.629679	1	F7	http://amigo.geneontology.org/amigo/term/GO:0005794
female sex differentiation	Gene Ontology	GO:0046660	1	222	0.639732	1	ROBO2	http://amigo.geneontology.org/amigo/term/GO:0046660
transmembrane signaling receptor activity	Gene Ontology	GO:0004888	1	223	0.64138	1	BMPR1B	http://amigo.geneontology.org/amigo/term/GO:0004888
regulation of protein modification process	Gene Ontology	GO:0031399	2	485	0.652231	1	NEURL1|GDF15	http://amigo.geneontology.org/amigo/term/GO:0031399
regulation of nitrogen compound metabolic process	Gene Ontology	GO:0051171	8	1915	0.652285	1	SERPINA12|MUC1|HOXB1|PYDC1|FOXH1|NAT1|MAPK8IP2|CST5	http://amigo.geneontology.org/amigo/term/GO:0051171
cellular response to oxidative stress	Gene Ontology	GO:0034599	1	232	0.655886	1	PAX2	http://amigo.geneontology.org/amigo/term/GO:0034599
protein maturation	Gene Ontology	GO:0051604	3	739	0.659256	1	F7|HPN|RHBDL1	http://amigo.geneontology.org/amigo/term/GO:0051604
regulation of RNA metabolic process	Gene Ontology	GO:0051252	6	1458	0.659306	1	AMH|CRABP2|MUC1|EMX1|CREB3L1|FOXH1	http://amigo.geneontology.org/amigo/term/GO:0051252
phosphotransferase activity, alcohol group as acceptor	Gene Ontology	GO:0016773	1	241	0.669806	1	MAPK15	http://amigo.geneontology.org/amigo/term/GO:0016773
negative regulation of signaling	Gene Ontology	GO:0023057	1	243	0.672823	1	SRMS	http://amigo.geneontology.org/amigo/term/GO:0023057
positive regulation of nucleic acid-templated transcription	Gene Ontology	GO:1903508	1	244	0.674321	1	PAX2	http://amigo.geneontology.org/amigo/term/GO:1903508
negative regulation of cell cycle	Gene Ontology	GO:0045786	1	244	0.674321	1	NAT1	http://amigo.geneontology.org/amigo/term/GO:0045786
response to muscle inactivity	Gene Ontology	GO:0014870	1	245	0.675812	1	MYOG	http://amigo.geneontology.org/amigo/term/GO:0014870
pyrophosphatase activity	Gene Ontology	GO:0016462	1	248	0.680245	1	FGD3	http://amigo.geneontology.org/amigo/term/GO:0016462
regulation of cellular component organization	Gene Ontology	GO:0051128	6	1493	0.68136	1	PTK6|SYT1|ROBO2|CLGN|TSPAN1|MYOG	http://amigo.geneontology.org/amigo/term/GO:0051128
response to stimulus	Gene Ontology	GO:0050896	20	4741	0.68138	1	SLITRK6|TRH|GNG13|CACNA1H|CFB|UNC5A|AGR2|TFF1|RET|RHBDL1|CST9|PYDC1|PAX2|SLC6A4|HTR1E|GDF15|FOXH1|GPR139|MTL5|TNFRSF18	http://amigo.geneontology.org/amigo/term/GO:0050896
development of primary female sexual characteristics	Gene Ontology	GO:0046545	1	250	0.683166	1	ROBO2	http://amigo.geneontology.org/amigo/term/GO:0046545
positive regulation of RNA biosynthetic process	Gene Ontology	GO:1902680	1	254	0.688929	1	FOXH1	http://amigo.geneontology.org/amigo/term/GO:1902680
regulation of intracellular signal transduction	Gene Ontology	GO:1902531	4	1023	0.690474	1	SERPINA12|GRM4|GNG3|PYDC1	http://amigo.geneontology.org/amigo/term/GO:1902531
transcription by RNA polymerase II	Gene Ontology	GO:0006366	2	525	0.6942	1	CREB3L1|TMPRSS6	http://amigo.geneontology.org/amigo/term/GO:0006366
cell projection assembly	Gene Ontology	GO:0030031	1	259	0.695987	1	CCDC151	http://amigo.geneontology.org/amigo/term/GO:0030031
negative regulation of signal transduction	Gene Ontology	GO:0009968	1	260	0.697379	1	CREB3L1	http://amigo.geneontology.org/amigo/term/GO:0009968
axonemal dynein complex assembly	Gene Ontology	GO:0070286	1	260	0.697379	1	ZMYND10	http://amigo.geneontology.org/amigo/term/GO:0070286
cytosol	Gene Ontology	GO:0005829	2	531	0.700123	1	FGD3|PTK6	http://amigo.geneontology.org/amigo/term/GO:0005829
response to decreased oxygen levels	Gene Ontology	GO:0036293	1	262	0.700145	1	SLC6A4	http://amigo.geneontology.org/amigo/term/GO:0036293
transferase activity, transferring phosphorus-containing groups	Gene Ontology	GO:0016772	1	269	0.709628	1	RET	http://amigo.geneontology.org/amigo/term/GO:0016772
peptidyl-tyrosine modification	Gene Ontology	GO:0018212	2	546	0.714515	1	SRMS|PTK6	http://amigo.geneontology.org/amigo/term/GO:0018212
regulation of catecholamine secretion	Gene Ontology	GO:0050433	1	277	0.7201	1	CGA	http://amigo.geneontology.org/amigo/term/GO:0050433
extracellular structure organization	Gene Ontology	GO:0043062	2	556	0.723786	1	CREB3L1|HPN	http://amigo.geneontology.org/amigo/term/GO:0043062
cellular response to inorganic substance	Gene Ontology	GO:0071241	1	283	0.727706	1	KCNH1	http://amigo.geneontology.org/amigo/term/GO:0071241
positive regulation of cellular biosynthetic process	Gene Ontology	GO:0031328	1	285	0.730195	1	RAMP1	http://amigo.geneontology.org/amigo/term/GO:0031328
intracellular transport	Gene Ontology	GO:0046907	1	288	0.733887	1	F7	http://amigo.geneontology.org/amigo/term/GO:0046907
cellular nitrogen compound biosynthetic process	Gene Ontology	GO:0044271	6	1586	0.73536	1	CRABP2|TMPRSS6|EMX1|HYPM|NEURL1|BMPR1B	http://amigo.geneontology.org/amigo/term/GO:0044271
intracellular non-membrane-bounded organelle	Gene Ontology	GO:0043232	2	569	0.735458	1	KRT31|CCDC78	http://amigo.geneontology.org/amigo/term/GO:0043232
regulation of protein serine/threonine kinase activity	Gene Ontology	GO:0071900	2	570	0.736338	1	GRM4|GNG3	http://amigo.geneontology.org/amigo/term/GO:0071900
positive regulation of protein metabolic process	Gene Ontology	GO:0051247	2	574	0.739834	1	GDF15|DOK7	http://amigo.geneontology.org/amigo/term/GO:0051247
organophosphate metabolic process	Gene Ontology	GO:0019637	2	575	0.740702	1	SLC44A4|MYOG	http://amigo.geneontology.org/amigo/term/GO:0019637
regulation of myotube differentiation	Gene Ontology	GO:0010830	2	578	0.743291	1	GDF15|MYOG	http://amigo.geneontology.org/amigo/term/GO:0010830
response to organic cyclic compound	Gene Ontology	GO:0014070	2	579	0.744149	1	CALY|SLC6A4	http://amigo.geneontology.org/amigo/term/GO:0014070
localization	Gene Ontology	GO:0051179	13	3290	0.745211	1	TRH|KCNH1|TRIM72|CALY|CGA|RAMP1|CLGN|CREB3L1|RIMS4|CACNG4|APOA1|MAPK8IP2|CLRN1	http://amigo.geneontology.org/amigo/term/GO:0051179
positive regulation of apoptotic process	Gene Ontology	GO:0043065	1	299	0.746998	1	BMPR1B	http://amigo.geneontology.org/amigo/term/GO:0043065
drug binding	Gene Ontology	GO:0008144	1	300	0.748157	1	CYP2B6	http://amigo.geneontology.org/amigo/term/GO:0008144
regulation of skeletal muscle fiber development	Gene Ontology	GO:0048742	1	300	0.748157	1	MYOG	http://amigo.geneontology.org/amigo/term/GO:0048742
female gonad development	Gene Ontology	GO:0008585	1	304	0.752742	1	ROBO2	http://amigo.geneontology.org/amigo/term/GO:0008585
cellular amide metabolic process	Gene Ontology	GO:0043603	3	865	0.758439	1	SPPL2C|NAT1|EIF4E1B	http://amigo.geneontology.org/amigo/term/GO:0043603
regulation of heterotypic cell-cell adhesion	Gene Ontology	GO:0034114	1	313	0.762757	1	APOA1	http://amigo.geneontology.org/amigo/term/GO:0034114
regulation of endocytosis	Gene Ontology	GO:0030100	1	315	0.764928	1	TSPAN1	http://amigo.geneontology.org/amigo/term/GO:0030100
non-membrane-bounded organelle	Gene Ontology	GO:0043228	2	606	0.766405	1	KIFC2|CCDC78	http://amigo.geneontology.org/amigo/term/GO:0043228
regulation of cellular process	Gene Ontology	GO:0050794	18	4547	0.771884	1	TRH|MALRD1|RHPN1|CRABP2|KISS1R|CGA|CST9L|HOXB1|RAMP1|GNG13|HYPM|NEURL1|CSTL1|CST9|HPN|SERPINA9|APOA1|CST5	http://amigo.geneontology.org/amigo/term/GO:0050794
regulation of kinase activity	Gene Ontology	GO:0043549	2	613	0.771895	1	NEURL1|EEF1A2	http://amigo.geneontology.org/amigo/term/GO:0043549
cellular developmental process	Gene Ontology	GO:0048869	7	1908	0.772767	1	FAM57B|TRIM72|FGD3|IL20|AGR2|PGLYRP2|BMPR1B	http://amigo.geneontology.org/amigo/term/GO:0048869
tube morphogenesis	Gene Ontology	GO:0035239	2	615	0.773443	1	AGR2|RET	http://amigo.geneontology.org/amigo/term/GO:0035239
catecholamine transport	Gene Ontology	GO:0051937	1	324	0.774451	1	CGA	http://amigo.geneontology.org/amigo/term/GO:0051937
regulation of protein complex assembly	Gene Ontology	GO:0043254	1	324	0.774451	1	CLGN	http://amigo.geneontology.org/amigo/term/GO:0043254
signal transduction	Gene Ontology	GO:0007165	13	3371	0.774791	1	STARD10|CALY|RHPN1|CRABP2|CGA|TMEM145|TMPRSS6|GNG13|MAPK15|BMPR1B|HPN|HSH2D|GNG3	http://amigo.geneontology.org/amigo/term/GO:0007165
syncytium formation by plasma membrane fusion	Gene Ontology	GO:0000768	1	327	0.777539	1	GDF15	http://amigo.geneontology.org/amigo/term/GO:0000768
regulation of response to stimulus	Gene Ontology	GO:0048583	7	1923	0.779544	1	TRIM72|PTK6|CGA|MUC1|NEURL1|GRM4|LRG1	http://amigo.geneontology.org/amigo/term/GO:0048583
regulation of MAP kinase activity	Gene Ontology	GO:0043405	2	624	0.780295	1	KISS1R|GNG3	http://amigo.geneontology.org/amigo/term/GO:0043405
negative regulation of NF-kappaB transcription factor activity	Gene Ontology	GO:0032088	1	330	0.780585	1	PYDC1	http://amigo.geneontology.org/amigo/term/GO:0032088
regulation of skeletal muscle adaptation	Gene Ontology	GO:0014733	1	331	0.781591	1	TNNT1	http://amigo.geneontology.org/amigo/term/GO:0014733
regulation of phosphate metabolic process	Gene Ontology	GO:0019220	3	905	0.784618	1	GDF15|APOA1|GNG3	http://amigo.geneontology.org/amigo/term/GO:0019220
defense response to Gram-positive bacterium	Gene Ontology	GO:0050830	2	630	0.784762	1	CGA|PGLYRP2	http://amigo.geneontology.org/amigo/term/GO:0050830
protein autophosphorylation	Gene Ontology	GO:0046777	1	335	0.78557	1	MAPK15	http://amigo.geneontology.org/amigo/term/GO:0046777
regulation of stress-activated protein kinase signaling cascade	Gene Ontology	GO:0070302	1	338	0.788507	1	MAPK8IP2	http://amigo.geneontology.org/amigo/term/GO:0070302
negative regulation of immune response	Gene Ontology	GO:0050777	2	645	0.795583	1	PGLYRP2|APOA1	http://amigo.geneontology.org/amigo/term/GO:0050777
regulation of cytoskeleton organization	Gene Ontology	GO:0051493	1	347	0.797078	1	PYDC1	http://amigo.geneontology.org/amigo/term/GO:0051493
cellular component assembly	Gene Ontology	GO:0022607	3	927	0.797993	1	LRRC24|APOA1|TRIM72	http://amigo.geneontology.org/amigo/term/GO:0022607
positive regulation of biological process	Gene Ontology	GO:0048518	7	1968	0.79898	1	SLITRK6|CACNA1H|MUC1|PYDC1|PGLYRP2|FGFR3|CLRN1	http://amigo.geneontology.org/amigo/term/GO:0048518
stress-activated protein kinase signaling cascade	Gene Ontology	GO:0031098	1	356	0.805304	1	MAPK8IP2	http://amigo.geneontology.org/amigo/term/GO:0031098
protein-containing complex assembly	Gene Ontology	GO:0065003	1	358	0.807086	1	DNAAF3	http://amigo.geneontology.org/amigo/term/GO:0065003
negative regulation of secretion	Gene Ontology	GO:0051048	1	360	0.808852	1	APOA1	http://amigo.geneontology.org/amigo/term/GO:0051048
regulation of molecular function	Gene Ontology	GO:0065009	4	1221	0.811388	1	IL20|GDF15|FGFR3|PAX2	http://amigo.geneontology.org/amigo/term/GO:0065009
microtubule polymerization or depolymerization	Gene Ontology	GO:0031109	1	367	0.814907	1	STMND1	http://amigo.geneontology.org/amigo/term/GO:0031109
negative regulation of RNA metabolic process	Gene Ontology	GO:0051253	1	368	0.815756	1	TMPRSS6	http://amigo.geneontology.org/amigo/term/GO:0051253
cellular response to stress	Gene Ontology	GO:0033554	2	679	0.818351	1	CREB3L1|DHRS2	http://amigo.geneontology.org/amigo/term/GO:0033554
regulation of chromosome organization	Gene Ontology	GO:0033044	1	382	0.827247	1	MAPK15	http://amigo.geneontology.org/amigo/term/GO:0033044
regulation of biological process	Gene Ontology	GO:0050789	16	4270	0.829098	1	FAM57B|CST5|GHRH|FGD3|SYT1|EIF4E1B|KCNF1|EMX1|CREB3L1|UNC5A|CEACAM6|NELL2|FOXH1|SEZ6L|MAPK8IP2|CLRN1	http://amigo.geneontology.org/amigo/term/GO:0050789
membrane-enclosed lumen	Gene Ontology	GO:0031974	2	697	0.829465	1	FOXH1|APOA1	http://amigo.geneontology.org/amigo/term/GO:0031974
negative regulation of leukocyte apoptotic process	Gene Ontology	GO:2000107	1	387	0.831175	1	HSH2D	http://amigo.geneontology.org/amigo/term/GO:2000107
nucleoside phosphate binding	Gene Ontology	GO:1901265	1	388	0.83195	1	BMPR1B	http://amigo.geneontology.org/amigo/term/GO:1901265
musculoskeletal movement	Gene Ontology	GO:0050881	2	704	0.83362	1	TNNT1|CCDC78	http://amigo.geneontology.org/amigo/term/GO:0050881
regulation of multi-organism process	Gene Ontology	GO:0043900	2	710	0.837109	1	PGLYRP2|HPN	http://amigo.geneontology.org/amigo/term/GO:0043900
regulation of protein transport	Gene Ontology	GO:0051223	2	711	0.837684	1	SLC30A8|LRRC46	http://amigo.geneontology.org/amigo/term/GO:0051223
intracellular organelle lumen	Gene Ontology	GO:0070013	2	712	0.838257	1	MYOG|PTK6	http://amigo.geneontology.org/amigo/term/GO:0070013
negative regulation of molecular function	Gene Ontology	GO:0044092	3	1003	0.83897	1	CST9|SPINK4|PYDC1	http://amigo.geneontology.org/amigo/term/GO:0044092
myoblast fusion	Gene Ontology	GO:0007520	1	399	0.840244	1	CACNA1H	http://amigo.geneontology.org/amigo/term/GO:0007520
developmental process	Gene Ontology	GO:0032502	12	3335	0.840311	1	TGM3|TRIM72|IL20|KLHL1|ROBO2|TFF1|MTL5|PGLYRP2|LRRC24|PRR15|FOXH1|MAPK8IP2	http://amigo.geneontology.org/amigo/term/GO:0032502
regulation of lipid biosynthetic process	Gene Ontology	GO:0046890	2	716	0.840531	1	MALRD1|APOA1	http://amigo.geneontology.org/amigo/term/GO:0046890
signal transduction by protein phosphorylation	Gene Ontology	GO:0023014	2	716	0.840531	1	GNG3|FGFR3	http://amigo.geneontology.org/amigo/term/GO:0023014
DNA binding	Gene Ontology	GO:0003677	1	401	0.841707	1	HYPM	http://amigo.geneontology.org/amigo/term/GO:0003677
digestion	Gene Ontology	GO:0007586	2	719	0.842218	1	PYY|CAPN9	http://amigo.geneontology.org/amigo/term/GO:0007586
epithelial cell differentiation	Gene Ontology	GO:0030855	1	402	0.842434	1	TGM3	http://amigo.geneontology.org/amigo/term/GO:0030855
protein localization	Gene Ontology	GO:0008104	1	403	0.843158	1	SYT9	http://amigo.geneontology.org/amigo/term/GO:0008104
regulation of gene expression	Gene Ontology	GO:0010468	3	1012	0.843316	1	EEF1A2|HOXB1|RET	http://amigo.geneontology.org/amigo/term/GO:0010468
metanephric nephron epithelium development	Gene Ontology	GO:0072243	1	406	0.845308	1	PAX2	http://amigo.geneontology.org/amigo/term/GO:0072243
regulation of macromolecule biosynthetic process	Gene Ontology	GO:0010556	5	1571	0.847549	1	HYPM|MAPK15|MUC1|FOXH1|RET	http://amigo.geneontology.org/amigo/term/GO:0010556
regulation of phosphorylation	Gene Ontology	GO:0042325	2	733	0.849879	1	GRM4|GDF15	http://amigo.geneontology.org/amigo/term/GO:0042325
positive regulation of phosphorylation	Gene Ontology	GO:0042327	2	735	0.850945	1	MAPK8IP2|PYDC1	http://amigo.geneontology.org/amigo/term/GO:0042327
negative regulation of response to stimulus	Gene Ontology	GO:0048585	2	738	0.852532	1	CREB3L1|TMPRSS6	http://amigo.geneontology.org/amigo/term/GO:0048585
protein transport	Gene Ontology	GO:0015031	1	418	0.85362	1	APOA1	http://amigo.geneontology.org/amigo/term/GO:0015031
response to nutrient	Gene Ontology	GO:0007584	2	742	0.854623	1	SSTR2|SLC6A4	http://amigo.geneontology.org/amigo/term/GO:0007584
cell communication	Gene Ontology	GO:0007154	14	3885	0.855262	1	KISS1R|GHRH|RHPN1|SYT9|F7|PYDC1|LRFN2|BPIFB1|SLC30A8|PYY|KCNH1|GDF15|SEZ6L|HSH2D	http://amigo.geneontology.org/amigo/term/GO:0007154
regulation of protein secretion	Gene Ontology	GO:0050708	2	745	0.856174	1	APOA1|PYDC1	http://amigo.geneontology.org/amigo/term/GO:0050708
regulation of toll-like receptor signaling pathway	Gene Ontology	GO:0034121	1	429	0.860849	1	BPIFB1	http://amigo.geneontology.org/amigo/term/GO:0034121
organic hydroxy compound transport	Gene Ontology	GO:0015850	2	761	0.864195	1	SLC6A4|SLC16A6	http://amigo.geneontology.org/amigo/term/GO:0015850
pteridine-containing compound metabolic process	Gene Ontology	GO:0042558	1	435	0.86464	1	PAH	http://amigo.geneontology.org/amigo/term/GO:0042558
organic cyclic compound metabolic process	Gene Ontology	GO:1901360	8	2412	0.865014	1	CACNA1H|DNASE1L2|HOXB1|TMPRSS6|EMX1|MAPK15|BMPR1B|DIO1	http://amigo.geneontology.org/amigo/term/GO:1901360
positive regulation of cell cycle	Gene Ontology	GO:0045787	1	439	0.86711	1	MUC1	http://amigo.geneontology.org/amigo/term/GO:0045787
ubiquitin-dependent protein catabolic process	Gene Ontology	GO:0006511	1	440	0.867721	1	TRIM72	http://amigo.geneontology.org/amigo/term/GO:0006511
circulatory system development	Gene Ontology	GO:0072359	3	1072	0.869776	1	FOXH1|RAMP1|TNNI3	http://amigo.geneontology.org/amigo/term/GO:0072359
negative regulation of lipid metabolic process	Gene Ontology	GO:0045833	1	447	0.871917	1	MALRD1	http://amigo.geneontology.org/amigo/term/GO:0045833
regulation of cell population proliferation	Gene Ontology	GO:0042127	4	1369	0.87414	1	MYOG|HPN|ARNT2|SLC6A4	http://amigo.geneontology.org/amigo/term/GO:0042127
cellular component biogenesis	Gene Ontology	GO:0044085	1	452	0.874833	1	CLRN1	http://amigo.geneontology.org/amigo/term/GO:0044085
regulation of signaling	Gene Ontology	GO:0023051	8	2449	0.875399	1	STARD10|FGD3|CGA|TMPRSS6|RET|GRM4|HSH2D|SEZ6L	http://amigo.geneontology.org/amigo/term/GO:0023051
regulation of muscle tissue development	Gene Ontology	GO:1901861	1	453	0.875408	1	MYOG	http://amigo.geneontology.org/amigo/term/GO:1901861
response to hexose	Gene Ontology	GO:0009746	1	454	0.875981	1	PAX2	http://amigo.geneontology.org/amigo/term/GO:0009746
positive regulation of phosphorus metabolic process	Gene Ontology	GO:0010562	2	790	0.877699	1	NEURL1|DOK7	http://amigo.geneontology.org/amigo/term/GO:0010562
nephron tubule development	Gene Ontology	GO:0072080	1	462	0.880468	1	PAX2	http://amigo.geneontology.org/amigo/term/GO:0072080
phosphatidylcholine metabolic process	Gene Ontology	GO:0046470	1	467	0.88319	1	SLC44A4	http://amigo.geneontology.org/amigo/term/GO:0046470
activation of MAPK activity	Gene Ontology	GO:0000187	1	467	0.88319	1	GRM4	http://amigo.geneontology.org/amigo/term/GO:0000187
actin filament polymerization	Gene Ontology	GO:0030041	1	467	0.88319	1	PYDC1	http://amigo.geneontology.org/amigo/term/GO:0030041
gene expression	Gene Ontology	GO:0010467	3	1111	0.884794	1	NAT1|MYOG|ARNT2	http://amigo.geneontology.org/amigo/term/GO:0010467
nucleoplasm	Gene Ontology	GO:0005654	1	474	0.886897	1	CRABP2	http://amigo.geneontology.org/amigo/term/GO:0005654
positive regulation of cell adhesion	Gene Ontology	GO:0045785	1	474	0.886897	1	PYDC1	http://amigo.geneontology.org/amigo/term/GO:0045785
cellular response to metal ion	Gene Ontology	GO:0071248	1	476	0.887935	1	CACNA1H	http://amigo.geneontology.org/amigo/term/GO:0071248
protein complex oligomerization	Gene Ontology	GO:0051259	1	478	0.888963	1	SYT1	http://amigo.geneontology.org/amigo/term/GO:0051259
negative regulation of hydrolase activity	Gene Ontology	GO:0051346	2	817	0.88915	1	CST9L|WFDC6	http://amigo.geneontology.org/amigo/term/GO:0051346
protein phosphorylation	Gene Ontology	GO:0006468	2	818	0.889555	1	KCNH1|MAPK8IP2	http://amigo.geneontology.org/amigo/term/GO:0006468
phosphorylation	Gene Ontology	GO:0016310	2	819	0.889958	1	EEF1A2|GNG3	http://amigo.geneontology.org/amigo/term/GO:0016310
cellular protein modification process	Gene Ontology	GO:0006464	2	821	0.89076	1	MAPK15|SRMS	http://amigo.geneontology.org/amigo/term/GO:0006464
angiogenesis	Gene Ontology	GO:0001525	1	482	0.890991	1	RAMP1	http://amigo.geneontology.org/amigo/term/GO:0001525
regulation of primary metabolic process	Gene Ontology	GO:0080090	4	1427	0.893332	1	HOXB1|MYOG|PYDC1|CST5	http://amigo.geneontology.org/amigo/term/GO:0080090
positive regulation of interleukin-1 beta production	Gene Ontology	GO:0032731	1	487	0.893474	1	PYDC1	http://amigo.geneontology.org/amigo/term/GO:0032731
fatty acid transport	Gene Ontology	GO:0015908	1	487	0.893474	1	LCN12	http://amigo.geneontology.org/amigo/term/GO:0015908
lipid homeostasis	Gene Ontology	GO:0055088	2	834	0.895844	1	MALRD1|APOA1	http://amigo.geneontology.org/amigo/term/GO:0055088
regulation of multicellular organismal process	Gene Ontology	GO:0051239	7	2265	0.896161	1	TNNT1|CRABP2|RET|BMPR1B|SSTR2|HPN|MYOG	http://amigo.geneontology.org/amigo/term/GO:0051239
feeding behavior	Gene Ontology	GO:0007631	1	493	0.89638	1	PYY	http://amigo.geneontology.org/amigo/term/GO:0007631
positive regulation of striated muscle cell differentiation	Gene Ontology	GO:0051155	1	494	0.896856	1	MYOG	http://amigo.geneontology.org/amigo/term/GO:0051155
negative regulation of transcription, DNA-templated	Gene Ontology	GO:0045892	1	496	0.897803	1	MUC1	http://amigo.geneontology.org/amigo/term/GO:0045892
macromolecule catabolic process	Gene Ontology	GO:0009057	1	496	0.897803	1	TRIM72	http://amigo.geneontology.org/amigo/term/GO:0009057
cellular ketone metabolic process	Gene Ontology	GO:0042180	2	844	0.899604	1	CYP21A2|MALRD1	http://amigo.geneontology.org/amigo/term/GO:0042180
organic cyclic compound binding	Gene Ontology	GO:0097159	2	845	0.899973	1	CREB3L1|RAB26	http://amigo.geneontology.org/amigo/term/GO:0097159
vasculature development	Gene Ontology	GO:0001944	1	505	0.901956	1	TMPRSS6	http://amigo.geneontology.org/amigo/term/GO:0001944
Cdc42 protein signal transduction	Gene Ontology	GO:0032488	1	509	0.903748	1	APOA1	http://amigo.geneontology.org/amigo/term/GO:0032488
protein modification process	Gene Ontology	GO:0036211	2	857	0.904303	1	NEURL1|MUC1	http://amigo.geneontology.org/amigo/term/GO:0036211
positive regulation of macromolecule metabolic process	Gene Ontology	GO:0010604	1	513	0.905506	1	RAMP1	http://amigo.geneontology.org/amigo/term/GO:0010604
negative regulation of peptidase activity	Gene Ontology	GO:0010466	2	861	0.905708	1	CSTL1|CST5	http://amigo.geneontology.org/amigo/term/GO:0010466
regulation of peptidase activity	Gene Ontology	GO:0052547	3	1178	0.907029	1	CST9|SPINK4|WFDC6	http://amigo.geneontology.org/amigo/term/GO:0052547
distal tubule development	Gene Ontology	GO:0072017	1	518	0.90766	1	PAX2	http://amigo.geneontology.org/amigo/term/GO:0072017
activation of cysteine-type endopeptidase activity involved in apoptotic process	Gene Ontology	GO:0006919	1	518	0.90766	1	RET	http://amigo.geneontology.org/amigo/term/GO:0006919
nucleus	Gene Ontology	GO:0005634	3	1182	0.908226	1	PYDC1|IGFALS|EMX1	http://amigo.geneontology.org/amigo/term/GO:0005634
negative regulation of endopeptidase activity	Gene Ontology	GO:0010951	2	869	0.908459	1	CST9|CST9L	http://amigo.geneontology.org/amigo/term/GO:0010951
amide transport	Gene Ontology	GO:0042886	3	1185	0.909114	1	LRRC46|APOA1|SLC30A8	http://amigo.geneontology.org/amigo/term/GO:0042886
heart process	Gene Ontology	GO:0003015	2	874	0.910141	1	CACNA1H|TNNI3	http://amigo.geneontology.org/amigo/term/GO:0003015
positive regulation of muscle cell differentiation	Gene Ontology	GO:0051149	1	526	0.911005	1	GDF15	http://amigo.geneontology.org/amigo/term/GO:0051149
nucleobase-containing compound biosynthetic process	Gene Ontology	GO:0034654	5	1777	0.911229	1	AMH|MYT1|PYDC1|RET|MAPK15	http://amigo.geneontology.org/amigo/term/GO:0034654
positive regulation of antigen processing and presentation	Gene Ontology	GO:0002579	1	528	0.911822	1	PYDC1	http://amigo.geneontology.org/amigo/term/GO:0002579
regulation of interleukin-1 secretion	Gene Ontology	GO:0050704	1	528	0.911822	1	APOA1	http://amigo.geneontology.org/amigo/term/GO:0050704
positive regulation of cell differentiation	Gene Ontology	GO:0045597	1	530	0.912632	1	SYT1	http://amigo.geneontology.org/amigo/term/GO:0045597
regulation of cysteine-type endopeptidase activity involved in apoptotic process	Gene Ontology	GO:0043281	1	530	0.912632	1	RET	http://amigo.geneontology.org/amigo/term/GO:0043281
collagen metabolic process	Gene Ontology	GO:0032963	1	532	0.913434	1	CLGN	http://amigo.geneontology.org/amigo/term/GO:0032963
regulation of signaling receptor activity	Gene Ontology	GO:0010469	1	535	0.914624	1	CACNG4	http://amigo.geneontology.org/amigo/term/GO:0010469
metanephros development	Gene Ontology	GO:0001656	1	535	0.914624	1	PAX2	http://amigo.geneontology.org/amigo/term/GO:0001656
positive regulation of cysteine-type endopeptidase activity	Gene Ontology	GO:2001056	1	537	0.915408	1	PYDC1	http://amigo.geneontology.org/amigo/term/GO:2001056
actin polymerization or depolymerization	Gene Ontology	GO:0008154	1	539	0.916184	1	PYDC1	http://amigo.geneontology.org/amigo/term/GO:0008154
regulation of phosphatidylinositol 3-kinase activity	Gene Ontology	GO:0043551	1	539	0.916184	1	FGFR3	http://amigo.geneontology.org/amigo/term/GO:0043551
regulation of phosphorus metabolic process	Gene Ontology	GO:0051174	2	893	0.91627	1	MYOG|GNG3	http://amigo.geneontology.org/amigo/term/GO:0051174
regulation of DNA-binding transcription factor activity	Gene Ontology	GO:0051090	1	542	0.917336	1	PYDC1	http://amigo.geneontology.org/amigo/term/GO:0051090
regulation of cell morphogenesis	Gene Ontology	GO:0022604	3	1216	0.917847	1	ROBO2|APOA1|RET	http://amigo.geneontology.org/amigo/term/GO:0022604
positive regulation of neurogenesis	Gene Ontology	GO:0050769	3	1216	0.917847	1	NEURL1|ROBO2|CRABP2	http://amigo.geneontology.org/amigo/term/GO:0050769
regulation of interleukin-1 beta secretion	Gene Ontology	GO:0050706	1	544	0.918096	1	PYDC1	http://amigo.geneontology.org/amigo/term/GO:0050706
multicellular organismal process	Gene Ontology	GO:0032501	15	4458	0.918702	1	SLITRK6|TRH|KCNK15|CALHM1|CACNA1H|UNC5A|PARD6B|TMPRSS6|EMX1|PRLH|PTK6|KLHL1|GNG13|CACNG4|ARNT2	http://amigo.geneontology.org/amigo/term/GO:0032501
cellular catabolic process	Gene Ontology	GO:0044248	3	1223	0.919711	1	DNASE1L2|PNLIPRP2|TRIM72	http://amigo.geneontology.org/amigo/term/GO:0044248
cerebral cortex neuron differentiation	Gene Ontology	GO:0021895	1	549	0.919964	1	EMX1	http://amigo.geneontology.org/amigo/term/GO:0021895
regulation of cysteine-type endopeptidase activity	Gene Ontology	GO:2000116	1	549	0.919964	1	RET	http://amigo.geneontology.org/amigo/term/GO:2000116
regulation of peptidyl-tyrosine phosphorylation	Gene Ontology	GO:0050730	1	550	0.920332	1	GPRC5A	http://amigo.geneontology.org/amigo/term/GO:0050730
regulation of DNA replication	Gene Ontology	GO:0006275	1	559	0.923573	1	MAPK15	http://amigo.geneontology.org/amigo/term/GO:0006275
muscle adaptation	Gene Ontology	GO:0043500	1	560	0.923925	1	TNNT1	http://amigo.geneontology.org/amigo/term/GO:0043500
amide biosynthetic process	Gene Ontology	GO:0043604	1	562	0.924624	1	DEGS2	http://amigo.geneontology.org/amigo/term/GO:0043604
interleukin-1 beta production	Gene Ontology	GO:0032611	1	562	0.924624	1	APOA1	http://amigo.geneontology.org/amigo/term/GO:0032611
interleukin-1 secretion	Gene Ontology	GO:0050701	1	562	0.924624	1	PYDC1	http://amigo.geneontology.org/amigo/term/GO:0050701
regulation of leukocyte differentiation	Gene Ontology	GO:1902105	2	923	0.925157	1	PGLYRP2|IL20	http://amigo.geneontology.org/amigo/term/GO:1902105
extracellular matrix organization	Gene Ontology	GO:0030198	1	564	0.925316	1	CREB3L1	http://amigo.geneontology.org/amigo/term/GO:0030198
positive regulation of protein serine/threonine kinase activity	Gene Ontology	GO:0071902	1	565	0.92566	1	KISS1R	http://amigo.geneontology.org/amigo/term/GO:0071902
response to monosaccharide	Gene Ontology	GO:0034284	1	567	0.926343	1	PAX2	http://amigo.geneontology.org/amigo/term/GO:0034284
metal ion homeostasis	Gene Ontology	GO:0055065	2	930	0.927099	1	PVALB|GNG3	http://amigo.geneontology.org/amigo/term/GO:0055065
drug metabolic process	Gene Ontology	GO:0017144	2	934	0.928188	1	CACNA1H|CYP2B6	http://amigo.geneontology.org/amigo/term/GO:0017144
heterocycle metabolic process	Gene Ontology	GO:0046483	7	2420	0.928772	1	CYP2A13|HOXB1|PYDC1|BMPR1B|PAX2|FOXH1|MYOG	http://amigo.geneontology.org/amigo/term/GO:0046483
response to alcohol	Gene Ontology	GO:0097305	1	575	0.929013	1	TRH	http://amigo.geneontology.org/amigo/term/GO:0097305
positive regulation of nervous system development	Gene Ontology	GO:0051962	3	1263	0.929641	1	NEURL1|RET|METRN	http://amigo.geneontology.org/amigo/term/GO:0051962
positive regulation of signaling	Gene Ontology	GO:0023056	2	946	0.931362	1	GDF15|GHRH	http://amigo.geneontology.org/amigo/term/GO:0023056
kidney epithelium development	Gene Ontology	GO:0072073	1	583	0.931587	1	ROBO2	http://amigo.geneontology.org/amigo/term/GO:0072073
regulation of myeloid leukocyte differentiation	Gene Ontology	GO:0002761	1	585	0.932216	1	IL20	http://amigo.geneontology.org/amigo/term/GO:0002761
positive regulation of cell communication	Gene Ontology	GO:0010647	2	950	0.93239	1	HSH2D|APOA1	http://amigo.geneontology.org/amigo/term/GO:0010647
cellular nitrogen compound metabolic process	Gene Ontology	GO:0034641	7	2448	0.933604	1	TRH|DNASE1L2|HOXB1|PYDC1|ENTPD8|NEURL1|NAT1	http://amigo.geneontology.org/amigo/term/GO:0034641
cell morphogenesis	Gene Ontology	GO:0000902	4	1587	0.933621	1	BMPR1B|APOA1|MAPK8IP2|CRABP2	http://amigo.geneontology.org/amigo/term/GO:0000902
interspecies interaction between organisms	Gene Ontology	GO:0044419	1	593	0.934674	1	PGLYRP2	http://amigo.geneontology.org/amigo/term/GO:0044419
regulation of myeloid cell differentiation	Gene Ontology	GO:0045637	1	595	0.935275	1	IL20	http://amigo.geneontology.org/amigo/term/GO:0045637
positive regulation of lipid kinase activity	Gene Ontology	GO:0090218	1	598	0.936165	1	EEF1A2	http://amigo.geneontology.org/amigo/term/GO:0090218
apoptotic process	Gene Ontology	GO:0006915	2	967	0.936601	1	HPN|RET	http://amigo.geneontology.org/amigo/term/GO:0006915
response to biotic stimulus	Gene Ontology	GO:0009607	4	1604	0.936974	1	CGA|SRMS|TNFRSF18|PTK6	http://amigo.geneontology.org/amigo/term/GO:0009607
regulation of insulin secretion	Gene Ontology	GO:0050796	2	970	0.937318	1	SYT9|SLC30A8	http://amigo.geneontology.org/amigo/term/GO:0050796
organic substance biosynthetic process	Gene Ontology	GO:1901576	5	1904	0.937698	1	NEURL1|BMPR1B|EMX1|RAMP1|ENTPD8	http://amigo.geneontology.org/amigo/term/GO:1901576
positive regulation of endocytosis	Gene Ontology	GO:0045807	1	604	0.93791	1	CALY	http://amigo.geneontology.org/amigo/term/GO:0045807
cation transport	Gene Ontology	GO:0006812	8	2754	0.93837	1	CACNA1H|KCNJ3|KCNK16|KCNK15|RAMP1|KCNF1|NKAIN1|MAPK8IP2	http://amigo.geneontology.org/amigo/term/GO:0006812
brain development	Gene Ontology	GO:0007420	4	1613	0.938686	1	SYT1|ROBO2|SEZ6L|PAX2	http://amigo.geneontology.org/amigo/term/GO:0007420
regulation of microtubule cytoskeleton organization	Gene Ontology	GO:0070507	1	607	0.938764	1	STMND1	http://amigo.geneontology.org/amigo/term/GO:0070507
erythrose 4-phosphate/phosphoenolpyruvate family amino acid catabolic process	Gene Ontology	GO:1902222	1	610	0.939607	1	PAH	http://amigo.geneontology.org/amigo/term/GO:1902222
embryonic morphogenesis	Gene Ontology	GO:0048598	3	1318	0.941463	1	SLITRK6|APOA1|PAX2	http://amigo.geneontology.org/amigo/term/GO:0048598
cellular response to chemical stimulus	Gene Ontology	GO:0070887	6	2219	0.942097	1	SERPINA12|PTK6|CYP21A2|F7|LRG1|MYOG	http://amigo.geneontology.org/amigo/term/GO:0070887
cellular lipid metabolic process	Gene Ontology	GO:0044255	3	1322	0.942247	1	DEGS2|PNLIPRP2|EEF1A2	http://amigo.geneontology.org/amigo/term/GO:0044255
regulation of cell differentiation	Gene Ontology	GO:0045595	3	1323	0.942442	1	NEURL1|CRABP2|METRN	http://amigo.geneontology.org/amigo/term/GO:0045595
hormone biosynthetic process	Gene Ontology	GO:0042446	1	628	0.944426	1	SLC44A4	http://amigo.geneontology.org/amigo/term/GO:0042446
organic cyclic compound biosynthetic process	Gene Ontology	GO:1901362	4	1645	0.944439	1	MALRD1|PAH|FOXH1|CYP21A2	http://amigo.geneontology.org/amigo/term/GO:1901362
positive regulation of ERK1 and ERK2 cascade	Gene Ontology	GO:0070374	1	629	0.944682	1	PYDC1	http://amigo.geneontology.org/amigo/term/GO:0070374
protein ubiquitination	Gene Ontology	GO:0016567	1	631	0.945191	1	MAPK15	http://amigo.geneontology.org/amigo/term/GO:0016567
negative regulation of very-low-density lipoprotein particle remodeling	Gene Ontology	GO:0010903	1	632	0.945443	1	APOA1	http://amigo.geneontology.org/amigo/term/GO:0010903
cytoskeleton organization	Gene Ontology	GO:0007010	3	1342	0.946024	1	CCDC151|PYDC1|KLHL1	http://amigo.geneontology.org/amigo/term/GO:0007010
RNA metabolic process	Gene Ontology	GO:0016070	3	1342	0.946024	1	MAPK15|MYOG|MYT1	http://amigo.geneontology.org/amigo/term/GO:0016070
heterocycle biosynthetic process	Gene Ontology	GO:0018130	4	1664	0.947618	1	BMPR1B|HOXB1|ARNT2|CREB3L1	http://amigo.geneontology.org/amigo/term/GO:0018130
regulation of protein kinase activity	Gene Ontology	GO:0045859	1	642	0.947907	1	PTK6	http://amigo.geneontology.org/amigo/term/GO:0045859
positive regulation of signal transduction	Gene Ontology	GO:0009967	2	1019	0.947993	1	GRM4|F7	http://amigo.geneontology.org/amigo/term/GO:0009967
protein modification by small protein conjugation	Gene Ontology	GO:0032446	1	644	0.948386	1	KLHL1	http://amigo.geneontology.org/amigo/term/GO:0032446
myotube differentiation	Gene Ontology	GO:0014902	1	647	0.949097	1	CEACAM5	http://amigo.geneontology.org/amigo/term/GO:0014902
localization of cell	Gene Ontology	GO:0051674	2	1025	0.949175	1	APOA1|F7	http://amigo.geneontology.org/amigo/term/GO:0051674
alcohol biosynthetic process	Gene Ontology	GO:0046165	1	648	0.949332	1	CACNA1H	http://amigo.geneontology.org/amigo/term/GO:0046165
positive regulation of protein kinase activity	Gene Ontology	GO:0045860	1	650	0.949798	1	NEURL1	http://amigo.geneontology.org/amigo/term/GO:0045860
regulation of blood pressure	Gene Ontology	GO:0008217	1	653	0.950489	1	CGA	http://amigo.geneontology.org/amigo/term/GO:0008217
positive regulation of protein secretion	Gene Ontology	GO:0050714	1	655	0.950945	1	SLC30A8	http://amigo.geneontology.org/amigo/term/GO:0050714
cellular cation homeostasis	Gene Ontology	GO:0030003	2	1035	0.951088	1	TMPRSS6|MTL5	http://amigo.geneontology.org/amigo/term/GO:0030003
regulation of cell adhesion	Gene Ontology	GO:0030155	1	656	0.951171	1	MUC1	http://amigo.geneontology.org/amigo/term/GO:0030155
regulation of hormone secretion	Gene Ontology	GO:0046883	2	1040	0.952019	1	KISS1R|SYT9	http://amigo.geneontology.org/amigo/term/GO:0046883
neuromuscular process controlling balance	Gene Ontology	GO:0050885	1	660	0.952066	1	CLRN1	http://amigo.geneontology.org/amigo/term/GO:0050885
cellular amine metabolic process	Gene Ontology	GO:0044106	1	661	0.952287	1	TRH	http://amigo.geneontology.org/amigo/term/GO:0044106
renal system development	Gene Ontology	GO:0072001	1	664	0.952944	1	PAX2	http://amigo.geneontology.org/amigo/term/GO:0072001
positive regulation of lymphocyte migration	Gene Ontology	GO:2000403	1	666	0.953377	1	PYDC1	http://amigo.geneontology.org/amigo/term/GO:2000403
regulation of response to biotic stimulus	Gene Ontology	GO:0002831	1	667	0.953592	1	PYDC1	http://amigo.geneontology.org/amigo/term/GO:0002831
urogenital system development	Gene Ontology	GO:0001655	1	668	0.953807	1	RET	http://amigo.geneontology.org/amigo/term/GO:0001655
locomotion	Gene Ontology	GO:0040011	3	1390	0.954174	1	BMPR1B|ROBO2|RET	http://amigo.geneontology.org/amigo/term/GO:0040011
negative regulation of cellular biosynthetic process	Gene Ontology	GO:0031327	2	1053	0.95436	1	MUC1|PAX2	http://amigo.geneontology.org/amigo/term/GO:0031327
regulation of protein localization	Gene Ontology	GO:0032880	1	675	0.955278	1	SYT9	http://amigo.geneontology.org/amigo/term/GO:0032880
alpha-amino acid biosynthetic process	Gene Ontology	GO:1901607	1	676	0.955484	1	PAH	http://amigo.geneontology.org/amigo/term/GO:1901607
positive regulation of fatty acid metabolic process	Gene Ontology	GO:0045923	1	677	0.95569	1	APOA1	http://amigo.geneontology.org/amigo/term/GO:0045923
regulation of lymphocyte migration	Gene Ontology	GO:2000401	1	678	0.955894	1	PYDC1	http://amigo.geneontology.org/amigo/term/GO:2000401
positive regulation of triglyceride metabolic process	Gene Ontology	GO:0090208	1	679	0.956098	1	APOA1	http://amigo.geneontology.org/amigo/term/GO:0090208
phosphorus metabolic process	Gene Ontology	GO:0006793	2	1067	0.95676	1	PNLIPRP2|SLC44A4	http://amigo.geneontology.org/amigo/term/GO:0006793
synapse maturation	Gene Ontology	GO:0060074	1	684	0.957101	1	SEZ6L	http://amigo.geneontology.org/amigo/term/GO:0060074
positive regulation of T cell migration	Gene Ontology	GO:2000406	1	685	0.957299	1	PYDC1	http://amigo.geneontology.org/amigo/term/GO:2000406
aromatic amino acid family catabolic process	Gene Ontology	GO:0009074	1	685	0.957299	1	PAH	http://amigo.geneontology.org/amigo/term/GO:0009074
response to fungus	Gene Ontology	GO:0009620	1	686	0.957496	1	CGA	http://amigo.geneontology.org/amigo/term/GO:0009620
organic substance transport	Gene Ontology	GO:0071702	2	1074	0.957914	1	SLC7A13|SLC16A6	http://amigo.geneontology.org/amigo/term/GO:0071702
positive regulation of protein phosphorylation	Gene Ontology	GO:0001934	1	691	0.958468	1	FGFR3	http://amigo.geneontology.org/amigo/term/GO:0001934
interferon-gamma production	Gene Ontology	GO:0032609	1	692	0.958659	1	PYDC1	http://amigo.geneontology.org/amigo/term/GO:0032609
regulation of biological quality	Gene Ontology	GO:0065008	12	4013	0.958998	1	CACNA1H|KISS1R|DIO1|KCNK15|RET|EMX1|HPN|GRM4|HSH2D|ZG16B|MTL5|GNG3	http://amigo.geneontology.org/amigo/term/GO:0065008
myeloid cell activation involved in immune response	Gene Ontology	GO:0002275	1	697	0.959605	1	CGA	http://amigo.geneontology.org/amigo/term/GO:0002275
cellular biogenic amine metabolic process	Gene Ontology	GO:0006576	1	698	0.959791	1	TRH	http://amigo.geneontology.org/amigo/term/GO:0006576
biological regulation	Gene Ontology	GO:0065007	13	4289	0.95983	1	SERPINA12|SPINK4|CRABP2|PARD6B|RET|PRLH|MALRD1|TNNI3|PVALB|CACNG1|FOXH1|ARNT2|CST5	http://amigo.geneontology.org/amigo/term/GO:0065007
nucleoside phosphate metabolic process	Gene Ontology	GO:0006753	1	699	0.959977	1	MYOG	http://amigo.geneontology.org/amigo/term/GO:0006753
hepaticobiliary system development	Gene Ontology	GO:0061008	1	700	0.960161	1	HPN	http://amigo.geneontology.org/amigo/term/GO:0061008
cell projection morphogenesis	Gene Ontology	GO:0048858	4	1754	0.960538	1	BMPR1B|EMX1|PARD6B|PAX2	http://amigo.geneontology.org/amigo/term/GO:0048858
digestive system process	Gene Ontology	GO:0022600	1	703	0.960711	1	APOA1	http://amigo.geneontology.org/amigo/term/GO:0022600
skeletal muscle tissue development	Gene Ontology	GO:0007519	1	703	0.960711	1	NEURL1	http://amigo.geneontology.org/amigo/term/GO:0007519
biosynthetic process	Gene Ontology	GO:0009058	4	1756	0.960788	1	BMPR1B|MYOG|NAT1|TMPRSS6	http://amigo.geneontology.org/amigo/term/GO:0009058
nucleobase-containing small molecule metabolic process	Gene Ontology	GO:0055086	1	704	0.960892	1	ENTPD8	http://amigo.geneontology.org/amigo/term/GO:0055086
tissue morphogenesis	Gene Ontology	GO:0048729	2	1094	0.961052	1	TNNI3|RET	http://amigo.geneontology.org/amigo/term/GO:0048729
cell adhesion	Gene Ontology	GO:0007155	2	1094	0.961052	1	MUC1|APOA1	http://amigo.geneontology.org/amigo/term/GO:0007155
positive regulation of MAPK cascade	Gene Ontology	GO:0043410	1	706	0.961252	1	KISS1R	http://amigo.geneontology.org/amigo/term/GO:0043410
MAPK cascade	Gene Ontology	GO:0000165	1	706	0.961252	1	KISS1R	http://amigo.geneontology.org/amigo/term/GO:0000165
intestinal cholesterol absorption	Gene Ontology	GO:0030299	1	707	0.961431	1	APOA1	http://amigo.geneontology.org/amigo/term/GO:0030299
regulation of lipid catabolic process	Gene Ontology	GO:0050994	1	715	0.962833	1	APOA1	http://amigo.geneontology.org/amigo/term/GO:0050994
cardiac chamber morphogenesis	Gene Ontology	GO:0003206	1	716	0.963004	1	TNNI3	http://amigo.geneontology.org/amigo/term/GO:0003206
bile acid biosynthetic process	Gene Ontology	GO:0006699	1	716	0.963004	1	MALRD1	http://amigo.geneontology.org/amigo/term/GO:0006699
epithelial tube morphogenesis	Gene Ontology	GO:0060562	1	718	0.963345	1	FOXH1	http://amigo.geneontology.org/amigo/term/GO:0060562
cardiac chamber development	Gene Ontology	GO:0003205	1	718	0.963345	1	FOXH1	http://amigo.geneontology.org/amigo/term/GO:0003205
regulation of transcription by RNA polymerase II	Gene Ontology	GO:0006357	1	718	0.963345	1	CREB3L1	http://amigo.geneontology.org/amigo/term/GO:0006357
negative regulation of coagulation	Gene Ontology	GO:0050819	1	719	0.963514	1	TMPRSS6	http://amigo.geneontology.org/amigo/term/GO:0050819
skeletal muscle organ development	Gene Ontology	GO:0060538	1	720	0.963683	1	MYOG	http://amigo.geneontology.org/amigo/term/GO:0060538
cardiac conduction	Gene Ontology	GO:0061337	1	721	0.963851	1	CACNG4	http://amigo.geneontology.org/amigo/term/GO:0061337
positive regulation of lipid metabolic process	Gene Ontology	GO:0045834	1	722	0.964018	1	APOA1	http://amigo.geneontology.org/amigo/term/GO:0045834
negative regulation of hemostasis	Gene Ontology	GO:1900047	1	723	0.964184	1	TMPRSS6	http://amigo.geneontology.org/amigo/term/GO:1900047
regulation of establishment of protein localization	Gene Ontology	GO:0070201	1	725	0.964514	1	LRRC46	http://amigo.geneontology.org/amigo/term/GO:0070201
organelle lumen	Gene Ontology	GO:0043233	1	725	0.964514	1	PTK6	http://amigo.geneontology.org/amigo/term/GO:0043233
regulation of cellular biosynthetic process	Gene Ontology	GO:0031326	3	1467	0.964893	1	HYPM|AMH|MAPK15	http://amigo.geneontology.org/amigo/term/GO:0031326
regulation of cardiac muscle contraction	Gene Ontology	GO:0055117	1	732	0.965645	1	CGA	http://amigo.geneontology.org/amigo/term/GO:0055117
bile acid metabolic process	Gene Ontology	GO:0008206	1	735	0.966119	1	MALRD1	http://amigo.geneontology.org/amigo/term/GO:0008206
cardiac muscle tissue morphogenesis	Gene Ontology	GO:0055008	1	738	0.966586	1	FOXH1	http://amigo.geneontology.org/amigo/term/GO:0055008
retinoid metabolic process	Gene Ontology	GO:0001523	1	740	0.966894	1	APOA1	http://amigo.geneontology.org/amigo/term/GO:0001523
amine transport	Gene Ontology	GO:0015837	1	741	0.967047	1	CGA	http://amigo.geneontology.org/amigo/term/GO:0015837
cytokine secretion	Gene Ontology	GO:0050663	1	743	0.967351	1	APOA1	http://amigo.geneontology.org/amigo/term/GO:0050663
regulation of cell projection organization	Gene Ontology	GO:0031344	3	1490	0.967608	1	NEURL1|CRABP2|PTK6	http://amigo.geneontology.org/amigo/term/GO:0031344
purine-containing compound metabolic process	Gene Ontology	GO:0072521	1	745	0.967652	1	MYOG	http://amigo.geneontology.org/amigo/term/GO:0072521
antigen processing and presentation	Gene Ontology	GO:0019882	1	746	0.967801	1	PYDC1	http://amigo.geneontology.org/amigo/term/GO:0019882
taxis	Gene Ontology	GO:0042330	2	1149	0.968569	1	CGA|F7	http://amigo.geneontology.org/amigo/term/GO:0042330
monocarboxylic acid transport	Gene Ontology	GO:0015718	1	753	0.968828	1	LCN12	http://amigo.geneontology.org/amigo/term/GO:0015718
cell projection organization	Gene Ontology	GO:0030030	4	1828	0.968886	1	KLHL1|PARD6B|ZMYND10|PAX2	http://amigo.geneontology.org/amigo/term/GO:0030030
regulation of cell communication	Gene Ontology	GO:0010646	6	2445	0.969161	1	SLC6A4|CGA|SYT1|AGR2|CREB3L1|PEX5L	http://amigo.geneontology.org/amigo/term/GO:0010646
negative regulation of nucleobase-containing compound metabolic process	Gene Ontology	GO:0045934	2	1156	0.96942	1	MAPK15|MYOG	http://amigo.geneontology.org/amigo/term/GO:0045934
regulation of localization	Gene Ontology	GO:0032879	7	2743	0.969465	1	TRH|GHRH|RAB26|TNFRSF18|RIMS4|APOA1|MAPK8IP2	http://amigo.geneontology.org/amigo/term/GO:0032879
unsaturated fatty acid metabolic process	Gene Ontology	GO:0033559	1	759	0.969682	1	CYP2A7	http://amigo.geneontology.org/amigo/term/GO:0033559
retina development in camera-type eye	Gene Ontology	GO:0060041	1	760	0.969822	1	RET	http://amigo.geneontology.org/amigo/term/GO:0060041
positive regulation of phosphate metabolic process	Gene Ontology	GO:0045937	1	760	0.969822	1	PYDC1	http://amigo.geneontology.org/amigo/term/GO:0045937
leukocyte differentiation	Gene Ontology	GO:0002521	2	1170	0.971054	1	PGLYRP2|DHRS2	http://amigo.geneontology.org/amigo/term/GO:0002521
leukocyte apoptotic process	Gene Ontology	GO:0071887	1	769	0.971055	1	HSH2D	http://amigo.geneontology.org/amigo/term/GO:0071887
neurotransmitter uptake	Gene Ontology	GO:0001504	1	774	0.971717	1	SLC6A4	http://amigo.geneontology.org/amigo/term/GO:0001504
triglyceride catabolic process	Gene Ontology	GO:0019433	1	775	0.971848	1	APOA1	http://amigo.geneontology.org/amigo/term/GO:0019433
protein secretion	Gene Ontology	GO:0009306	1	776	0.971978	1	SYT9	http://amigo.geneontology.org/amigo/term/GO:0009306
cholesterol transport	Gene Ontology	GO:0030301	1	776	0.971978	1	APOA1	http://amigo.geneontology.org/amigo/term/GO:0030301
drug catabolic process	Gene Ontology	GO:0042737	1	776	0.971978	1	PAH	http://amigo.geneontology.org/amigo/term/GO:0042737
establishment of localization	Gene Ontology	GO:0051234	10	3635	0.972365	1	KCNJ3|SYT9|TRIM72|KCNE4|CALY|RAB26|LRRC46|SLC22A24|SYT1|COX6C	http://amigo.geneontology.org/amigo/term/GO:0051234
regulation of leukocyte migration	Gene Ontology	GO:0002685	2	1183	0.972497	1	TNFRSF18|F7	http://amigo.geneontology.org/amigo/term/GO:0002685
sterol homeostasis	Gene Ontology	GO:0055092	1	786	0.973247	1	APOA1	http://amigo.geneontology.org/amigo/term/GO:0055092
cellular metal ion homeostasis	Gene Ontology	GO:0006875	1	786	0.973247	1	MTL5	http://amigo.geneontology.org/amigo/term/GO:0006875
isoprenoid metabolic process	Gene Ontology	GO:0006720	1	786	0.973247	1	CRABP2	http://amigo.geneontology.org/amigo/term/GO:0006720
positive regulation of cell development	Gene Ontology	GO:0010720	1	787	0.973371	1	PTK6	http://amigo.geneontology.org/amigo/term/GO:0010720
arachidonic acid metabolic process	Gene Ontology	GO:0019369	1	791	0.97386	1	CYP2A7	http://amigo.geneontology.org/amigo/term/GO:0019369
production of molecular mediator of immune response	Gene Ontology	GO:0002440	1	792	0.97398	1	APOA1	http://amigo.geneontology.org/amigo/term/GO:0002440
response to organic substance	Gene Ontology	GO:0010033	4	1884	0.974079	1	SERPINA12|GDF15|CREB3L1|TNFRSF18	http://amigo.geneontology.org/amigo/term/GO:0010033
response to lipid	Gene Ontology	GO:0033993	2	1201	0.974381	1	FOXH1|MYOG	http://amigo.geneontology.org/amigo/term/GO:0033993
response to metal ion	Gene Ontology	GO:0010038	1	796	0.974458	1	TFF1	http://amigo.geneontology.org/amigo/term/GO:0010038
chemical synaptic transmission	Gene Ontology	GO:0007268	5	2213	0.975112	1	RIMS4|NEURL1|LRFN2|SYT1|KISS1R	http://amigo.geneontology.org/amigo/term/GO:0007268
neutral lipid catabolic process	Gene Ontology	GO:0046461	1	802	0.975159	1	APOA1	http://amigo.geneontology.org/amigo/term/GO:0046461
glycerolipid metabolic process	Gene Ontology	GO:0046486	1	805	0.975502	1	FGFR3	http://amigo.geneontology.org/amigo/term/GO:0046486
monocarboxylic acid metabolic process	Gene Ontology	GO:0032787	2	1227	0.976884	1	MYOG|CYP2B6	http://amigo.geneontology.org/amigo/term/GO:0032787
lipid localization	Gene Ontology	GO:0010876	1	818	0.976935	1	KISS1R	http://amigo.geneontology.org/amigo/term/GO:0010876
regulation of lipid metabolic process	Gene Ontology	GO:0019216	1	820	0.977147	1	MALRD1	http://amigo.geneontology.org/amigo/term/GO:0019216
cardiac muscle tissue development	Gene Ontology	GO:0048738	1	821	0.977253	1	TNNI3	http://amigo.geneontology.org/amigo/term/GO:0048738
positive regulation of innate immune response	Gene Ontology	GO:0045089	1	824	0.977567	1	PGLYRP2	http://amigo.geneontology.org/amigo/term/GO:0045089
regulation of endopeptidase activity	Gene Ontology	GO:0052548	2	1243	0.978306	1	SERPINA12|CSTL1	http://amigo.geneontology.org/amigo/term/GO:0052548
steroid biosynthetic process	Gene Ontology	GO:0006694	1	836	0.978782	1	APOA1	http://amigo.geneontology.org/amigo/term/GO:0006694
DNA integrity checkpoint	Gene Ontology	GO:0031570	1	837	0.97888	1	MUC1	http://amigo.geneontology.org/amigo/term/GO:0031570
monocarboxylic acid biosynthetic process	Gene Ontology	GO:0072330	1	837	0.97888	1	MALRD1	http://amigo.geneontology.org/amigo/term/GO:0072330
positive regulation of response to external stimulus	Gene Ontology	GO:0032103	2	1254	0.979234	1	PGLYRP2|PYDC1	http://amigo.geneontology.org/amigo/term/GO:0032103
nitrogen compound transport	Gene Ontology	GO:0071705	3	1620	0.97959	1	SYT9|LRRC46|PEX5L	http://amigo.geneontology.org/amigo/term/GO:0071705
regulation of apoptotic process	Gene Ontology	GO:0042981	1	848	0.97993	1	HSH2D	http://amigo.geneontology.org/amigo/term/GO:0042981
negative regulation of cell activation	Gene Ontology	GO:0050866	1	848	0.97993	1	PGLYRP2	http://amigo.geneontology.org/amigo/term/GO:0050866
cell killing	Gene Ontology	GO:0001906	1	857	0.980751	1	CGA	http://amigo.geneontology.org/amigo/term/GO:0001906
positive regulation of cellular component biogenesis	Gene Ontology	GO:0044089	2	1276	0.980976	1	NEURL1|CLGN	http://amigo.geneontology.org/amigo/term/GO:0044089
cellular homeostasis	Gene Ontology	GO:0019725	1	861	0.981105	1	SLC30A8	http://amigo.geneontology.org/amigo/term/GO:0019725
neuron development	Gene Ontology	GO:0048666	4	1980	0.981143	1	BMPR1B|KLHL1|CRABP2|METRN	http://amigo.geneontology.org/amigo/term/GO:0048666
axon development	Gene Ontology	GO:0061564	3	1648	0.98155	1	APOA1|RET|METRN	http://amigo.geneontology.org/amigo/term/GO:0061564
animal organ development	Gene Ontology	GO:0048513	4	1996	0.982128	1	SYT1|DNASE1L2|TNNI3|SLC6A4	http://amigo.geneontology.org/amigo/term/GO:0048513
lipid catabolic process	Gene Ontology	GO:0016042	1	874	0.982211	1	PNLIPRP2	http://amigo.geneontology.org/amigo/term/GO:0016042
cell activation involved in immune response	Gene Ontology	GO:0002263	1	877	0.982457	1	CGA	http://amigo.geneontology.org/amigo/term/GO:0002263
intracellular signal transduction	Gene Ontology	GO:0035556	2	1300	0.982715	1	CGA|MAPK15	http://amigo.geneontology.org/amigo/term/GO:0035556
monosaccharide metabolic process	Gene Ontology	GO:0005996	1	882	0.982859	1	SERPINA12	http://amigo.geneontology.org/amigo/term/GO:0005996
intraspecies interaction between organisms	Gene Ontology	GO:0051703	1	886	0.983175	1	MAPK8IP2	http://amigo.geneontology.org/amigo/term/GO:0051703
cellular hormone metabolic process	Gene Ontology	GO:0034754	1	895	0.983863	1	CACNA1H	http://amigo.geneontology.org/amigo/term/GO:0034754
cell migration	Gene Ontology	GO:0016477	2	1319	0.983982	1	PTK6|CEACAM6	http://amigo.geneontology.org/amigo/term/GO:0016477
cerebellum development	Gene Ontology	GO:0021549	1	903	0.984452	1	SEZ6L	http://amigo.geneontology.org/amigo/term/GO:0021549
organonitrogen compound biosynthetic process	Gene Ontology	GO:1901566	1	907	0.984738	1	EIF4E1B	http://amigo.geneontology.org/amigo/term/GO:1901566
transcription, DNA-templated	Gene Ontology	GO:0006351	3	1708	0.985165	1	MUC1|CREB3L1|PAX2	http://amigo.geneontology.org/amigo/term/GO:0006351
regulation of cell morphogenesis involved in differentiation	Gene Ontology	GO:0010769	2	1341	0.985337	1	CRABP2|METRN	http://amigo.geneontology.org/amigo/term/GO:0010769
positive regulation of catalytic activity	Gene Ontology	GO:0043085	1	917	0.98543	1	PYDC1	http://amigo.geneontology.org/amigo/term/GO:0043085
muscle system process	Gene Ontology	GO:0003012	3	1721	0.985853	1	TNNT1|CGA|CCDC78	http://amigo.geneontology.org/amigo/term/GO:0003012
anatomical structure development	Gene Ontology	GO:0048856	10	3916	0.986523	1	SLC6A4|SYT1|HOXB1|RAMP1|PARD6B|NEURL1|CREB3L1|KLHL1|OTOR|TNFRSF18	http://amigo.geneontology.org/amigo/term/GO:0048856
organonitrogen compound catabolic process	Gene Ontology	GO:1901565	1	936	0.986661	1	MAPK15	http://amigo.geneontology.org/amigo/term/GO:1901565
negative regulation of macromolecule biosynthetic process	Gene Ontology	GO:0010558	1	940	0.986907	1	TMPRSS6	http://amigo.geneontology.org/amigo/term/GO:0010558
cellular response to lipid	Gene Ontology	GO:0071396	1	941	0.986968	1	PTK6	http://amigo.geneontology.org/amigo/term/GO:0071396
microtubule cytoskeleton organization	Gene Ontology	GO:0000226	2	1374	0.987163	1	DNAAF3|ZMYND10	http://amigo.geneontology.org/amigo/term/GO:0000226
regulation of cellular component movement	Gene Ontology	GO:0051270	2	1376	0.987266	1	PARD6B|F7	http://amigo.geneontology.org/amigo/term/GO:0051270
positive regulation of response to stimulus	Gene Ontology	GO:0048584	4	2098	0.987353	1	KISS1R|BPIFB1|FGFR3|MAPK8IP2	http://amigo.geneontology.org/amigo/term/GO:0048584
positive regulation of cell population proliferation	Gene Ontology	GO:0008284	1	951	0.987559	1	GHRH	http://amigo.geneontology.org/amigo/term/GO:0008284
regulation of wound healing	Gene Ontology	GO:0061041	1	951	0.987559	1	F7	http://amigo.geneontology.org/amigo/term/GO:0061041
negative regulation of biosynthetic process	Gene Ontology	GO:0009890	1	952	0.987617	1	PAX2	http://amigo.geneontology.org/amigo/term/GO:0009890
oxidation-reduction process	Gene Ontology	GO:0055114	2	1385	0.987721	1	CYP21A2|DEGS2	http://amigo.geneontology.org/amigo/term/GO:0055114
neurotransmitter transport	Gene Ontology	GO:0006836	3	1770	0.988184	1	SYT9|SLC6A4|TRH	http://amigo.geneontology.org/amigo/term/GO:0006836
central nervous system development	Gene Ontology	GO:0007417	3	1773	0.988314	1	SSTR2|ARNT2|KLHL1	http://amigo.geneontology.org/amigo/term/GO:0007417
organic acid catabolic process	Gene Ontology	GO:0016054	1	970	0.988611	1	PAH	http://amigo.geneontology.org/amigo/term/GO:0016054
regulation of biosynthetic process	Gene Ontology	GO:0009889	2	1407	0.988767	1	NEURL1|RET	http://amigo.geneontology.org/amigo/term/GO:0009889
cellular response to xenobiotic stimulus	Gene Ontology	GO:0071466	1	975	0.988873	1	CYP2A13	http://amigo.geneontology.org/amigo/term/GO:0071466
steroid metabolic process	Gene Ontology	GO:0008202	1	978	0.989027	1	MALRD1	http://amigo.geneontology.org/amigo/term/GO:0008202
regulation of peptide transport	Gene Ontology	GO:0090087	1	981	0.989179	1	TRH	http://amigo.geneontology.org/amigo/term/GO:0090087
cellular calcium ion homeostasis	Gene Ontology	GO:0006874	1	981	0.989179	1	GNG3	http://amigo.geneontology.org/amigo/term/GO:0006874
multi-organism behavior	Gene Ontology	GO:0051705	1	983	0.989279	1	SLC6A4	http://amigo.geneontology.org/amigo/term/GO:0051705
vesicle-mediated transport	Gene Ontology	GO:0016192	4	2148	0.98935	1	RIMS4|CGA|TRIM72|RAB26	http://amigo.geneontology.org/amigo/term/GO:0016192
carboxylic acid biosynthetic process	Gene Ontology	GO:0046394	1	986	0.989427	1	APOA1	http://amigo.geneontology.org/amigo/term/GO:0046394
cellular divalent inorganic cation homeostasis	Gene Ontology	GO:0072503	1	989	0.989574	1	PVALB	http://amigo.geneontology.org/amigo/term/GO:0072503
response to xenobiotic stimulus	Gene Ontology	GO:0009410	1	992	0.989718	1	CYP2B6	http://amigo.geneontology.org/amigo/term/GO:0009410
cellular response to stimulus	Gene Ontology	GO:0051716	6	2814	0.98979	1	STARD10|F7|PRLH|CEACAM6|HSH2D|SEZ6L	http://amigo.geneontology.org/amigo/term/GO:0051716
organic acid metabolic process	Gene Ontology	GO:0006082	2	1434	0.989933	1	MALRD1|CYP2A7	http://amigo.geneontology.org/amigo/term/GO:0006082
negative regulation of macromolecule metabolic process	Gene Ontology	GO:0010605	2	1437	0.990055	1	MUC1|PTK6	http://amigo.geneontology.org/amigo/term/GO:0010605
neuron projection morphogenesis	Gene Ontology	GO:0048812	3	1820	0.990181	1	LRFN2|PARD6B|PAX2	http://amigo.geneontology.org/amigo/term/GO:0048812
muscle tissue morphogenesis	Gene Ontology	GO:0060415	1	1002	0.990186	1	TNNI3	http://amigo.geneontology.org/amigo/term/GO:0060415
triglyceride metabolic process	Gene Ontology	GO:0006641	1	1004	0.990276	1	SERPINA12	http://amigo.geneontology.org/amigo/term/GO:0006641
neutral lipid metabolic process	Gene Ontology	GO:0006638	1	1005	0.990322	1	PNLIPRP2	http://amigo.geneontology.org/amigo/term/GO:0006638
regulation of transport	Gene Ontology	GO:0051049	5	2511	0.990364	1	KCNK16|KCNK15|SLC30A8|RAB26|LRRC46	http://amigo.geneontology.org/amigo/term/GO:0051049
positive regulation of cytokine production	Gene Ontology	GO:0001819	1	1015	0.990762	1	PYDC1	http://amigo.geneontology.org/amigo/term/GO:0001819
telomere maintenance	Gene Ontology	GO:0000723	1	1025	0.991182	1	MAPK15	http://amigo.geneontology.org/amigo/term/GO:0000723
striated muscle cell differentiation	Gene Ontology	GO:0051146	2	1468	0.991235	1	CACNA1H|TRIM72	http://amigo.geneontology.org/amigo/term/GO:0051146
regulation of actin filament-based process	Gene Ontology	GO:0032970	1	1029	0.991344	1	APOA1	http://amigo.geneontology.org/amigo/term/GO:0032970
cellular chemical homeostasis	Gene Ontology	GO:0055082	1	1039	0.991738	1	TMPRSS6	http://amigo.geneontology.org/amigo/term/GO:0055082
peptide secretion	Gene Ontology	GO:0002790	1	1041	0.991814	1	APOA1	http://amigo.geneontology.org/amigo/term/GO:0002790
regulation of cytosolic calcium ion concentration	Gene Ontology	GO:0051480	1	1043	0.99189	1	PVALB	http://amigo.geneontology.org/amigo/term/GO:0051480
regulation of response to stress	Gene Ontology	GO:0080134	2	1491	0.992021	1	APOA1|TMPRSS6	http://amigo.geneontology.org/amigo/term/GO:0080134
divalent inorganic cation homeostasis	Gene Ontology	GO:0072507	1	1052	0.992223	1	PVALB	http://amigo.geneontology.org/amigo/term/GO:0072507
regulation of transporter activity	Gene Ontology	GO:0032409	1	1054	0.992295	1	CACNG4	http://amigo.geneontology.org/amigo/term/GO:0032409
positive regulation of cell motility	Gene Ontology	GO:2000147	1	1054	0.992295	1	F7	http://amigo.geneontology.org/amigo/term/GO:2000147
positive regulation of phagocytosis	Gene Ontology	GO:0050766	1	1057	0.992402	1	PYDC1	http://amigo.geneontology.org/amigo/term/GO:0050766
cell population proliferation	Gene Ontology	GO:0008283	4	2249	0.992507	1	KISS1R|DHRS2|HPN|PYY	http://amigo.geneontology.org/amigo/term/GO:0008283
response to inorganic substance	Gene Ontology	GO:0010035	1	1065	0.99268	1	SLC30A8	http://amigo.geneontology.org/amigo/term/GO:0010035
regulation of hormone levels	Gene Ontology	GO:0010817	4	2258	0.992741	1	CACNA1H|KISS1R|DHRS2|APOA1	http://amigo.geneontology.org/amigo/term/GO:0010817
system development	Gene Ontology	GO:0048731	9	3850	0.992768	1	TGM3|IL20|DNASE1L2|RAMP1|NEURL1|PRLH|SSTR2|KLHL1|FOXH1	http://amigo.geneontology.org/amigo/term/GO:0048731
regulation of organelle organization	Gene Ontology	GO:0033043	1	1068	0.992781	1	MUC1	http://amigo.geneontology.org/amigo/term/GO:0033043
detection of mechanical stimulus involved in sensory perception	Gene Ontology	GO:0050974	1	1068	0.992781	1	HPN	http://amigo.geneontology.org/amigo/term/GO:0050974
hormone secretion	Gene Ontology	GO:0046879	1	1084	0.9933	1	SLC30A8	http://amigo.geneontology.org/amigo/term/GO:0046879
organelle organization	Gene Ontology	GO:0006996	2	1535	0.993338	1	HYPM|MAPK15	http://amigo.geneontology.org/amigo/term/GO:0006996
innate immune response	Gene Ontology	GO:0045087	2	1539	0.993447	1	SRMS|PYDC1	http://amigo.geneontology.org/amigo/term/GO:0045087
regulation of neuron differentiation	Gene Ontology	GO:0045664	2	1541	0.993501	1	PTK6|METRN	http://amigo.geneontology.org/amigo/term/GO:0045664
regulation of chemotaxis	Gene Ontology	GO:0050920	1	1091	0.993515	1	ROBO2	http://amigo.geneontology.org/amigo/term/GO:0050920
secretion	Gene Ontology	GO:0046903	4	2300	0.99374	1	NEURL1|GHRH|APOA1|TRIM72	http://amigo.geneontology.org/amigo/term/GO:0046903
transport	Gene Ontology	GO:0006810	8	3602	0.993832	1	STARD10|CALY|RAMP1|SYT13|SLC30A8|GRM4|COX6C|HPN	http://amigo.geneontology.org/amigo/term/GO:0006810
signaling	Gene Ontology	GO:0023052	9	3906	0.993837	1	GHRH|UNC5A|TMEM145|PYDC1|BMPR1B|IGFALS|KCNK15|GDF15|MAPK8IP2	http://amigo.geneontology.org/amigo/term/GO:0023052
sensory perception	Gene Ontology	GO:0007600	2	1563	0.994063	1	SLITRK6|PAX2	http://amigo.geneontology.org/amigo/term/GO:0007600
regulation of RNA biosynthetic process	Gene Ontology	GO:2001141	2	1569	0.994208	1	AMH|FOXH1	http://amigo.geneontology.org/amigo/term/GO:2001141
homeostatic process	Gene Ontology	GO:0042592	3	1974	0.994495	1	HSH2D|SLC30A8|TMPRSS6	http://amigo.geneontology.org/amigo/term/GO:0042592
biological adhesion	Gene Ontology	GO:0022610	1	1136	0.994742	1	SPACA4	http://amigo.geneontology.org/amigo/term/GO:0022610
regulation of hydrolase activity	Gene Ontology	GO:0051336	1	1137	0.994766	1	FGD3	http://amigo.geneontology.org/amigo/term/GO:0051336
hormone transport	Gene Ontology	GO:0009914	1	1143	0.994911	1	GHRH	http://amigo.geneontology.org/amigo/term/GO:0009914
regulation of coagulation	Gene Ontology	GO:0050818	1	1150	0.995074	1	F7	http://amigo.geneontology.org/amigo/term/GO:0050818
regulation of developmental process	Gene Ontology	GO:0050793	3	2005	0.995107	1	FAM57B|IL20|AGR2	http://amigo.geneontology.org/amigo/term/GO:0050793
regulation of cell development	Gene Ontology	GO:0060284	2	1610	0.995111	1	NEURL1|RET	http://amigo.geneontology.org/amigo/term/GO:0060284
response to external biotic stimulus	Gene Ontology	GO:0043207	2	1614	0.995191	1	CST9|CFB	http://amigo.geneontology.org/amigo/term/GO:0043207
neurogenesis	Gene Ontology	GO:0022008	4	2376	0.995223	1	SLITRK6|NEURL1|EMX1|METRN	http://amigo.geneontology.org/amigo/term/GO:0022008
negative regulation of nitrogen compound metabolic process	Gene Ontology	GO:0051172	1	1158	0.995255	1	SERPINA9	http://amigo.geneontology.org/amigo/term/GO:0051172
regulation of locomotion	Gene Ontology	GO:0040012	1	1163	0.995364	1	F7	http://amigo.geneontology.org/amigo/term/GO:0040012
response to cytokine	Gene Ontology	GO:0034097	1	1166	0.995428	1	PYDC1	http://amigo.geneontology.org/amigo/term/GO:0034097
negative regulation of cellular macromolecule biosynthetic process	Gene Ontology	GO:2000113	1	1167	0.99545	1	TMPRSS6	http://amigo.geneontology.org/amigo/term/GO:2000113
cellular response to cytokine stimulus	Gene Ontology	GO:0071345	1	1168	0.995471	1	PYDC1	http://amigo.geneontology.org/amigo/term/GO:0071345
negative regulation of gene expression	Gene Ontology	GO:0010629	1	1168	0.995471	1	TMPRSS6	http://amigo.geneontology.org/amigo/term/GO:0010629
RNA biosynthetic process	Gene Ontology	GO:0032774	2	1629	0.995481	1	PYDC1|ARNT2	http://amigo.geneontology.org/amigo/term/GO:0032774
fatty acid metabolic process	Gene Ontology	GO:0006631	1	1169	0.995492	1	CYP2A7	http://amigo.geneontology.org/amigo/term/GO:0006631
immune effector process	Gene Ontology	GO:0002252	3	2035	0.995637	1	CGA|CFB|APOA1	http://amigo.geneontology.org/amigo/term/GO:0002252
tissue development	Gene Ontology	GO:0009888	2	1641	0.9957	1	KRT31|MYOG	http://amigo.geneontology.org/amigo/term/GO:0009888
signal release	Gene Ontology	GO:0023061	2	1649	0.995841	1	TRH|SLC30A8	http://amigo.geneontology.org/amigo/term/GO:0023061
organic substance catabolic process	Gene Ontology	GO:1901575	1	1196	0.996026	1	MYOG	http://amigo.geneontology.org/amigo/term/GO:1901575
positive regulation of synapse assembly	Gene Ontology	GO:0051965	1	1206	0.996207	1	SLITRK6	http://amigo.geneontology.org/amigo/term/GO:0051965
modulation of chemical synaptic transmission	Gene Ontology	GO:0050804	2	1672	0.99622	1	GRM4|SYT1	http://amigo.geneontology.org/amigo/term/GO:0050804
regulation of muscle contraction	Gene Ontology	GO:0006937	1	1209	0.99626	1	TNNI3	http://amigo.geneontology.org/amigo/term/GO:0006937
peptide transport	Gene Ontology	GO:0015833	1	1215	0.996363	1	APOA1	http://amigo.geneontology.org/amigo/term/GO:0015833
regulation of defense response	Gene Ontology	GO:0031347	1	1219	0.99643	1	IL20	http://amigo.geneontology.org/amigo/term/GO:0031347
neuron recognition	Gene Ontology	GO:0008038	1	1227	0.996561	1	ROBO2	http://amigo.geneontology.org/amigo/term/GO:0008038
muscle contraction	Gene Ontology	GO:0006936	2	1695	0.996565	1	CACNG1|SSTR2	http://amigo.geneontology.org/amigo/term/GO:0006936
cytolysis	Gene Ontology	GO:0019835	1	1232	0.996641	1	PAX2	http://amigo.geneontology.org/amigo/term/GO:0019835
response to drug	Gene Ontology	GO:0042493	1	1233	0.996656	1	AMH	http://amigo.geneontology.org/amigo/term/GO:0042493
negative regulation of cellular metabolic process	Gene Ontology	GO:0031324	1	1236	0.996703	1	PYDC1	http://amigo.geneontology.org/amigo/term/GO:0031324
divalent metal ion transport	Gene Ontology	GO:0070838	2	1720	0.996906	1	CACNA1H|CACNG4	http://amigo.geneontology.org/amigo/term/GO:0070838
positive regulation of neuron differentiation	Gene Ontology	GO:0045666	1	1252	0.99694	1	CRABP2	http://amigo.geneontology.org/amigo/term/GO:0045666
cell motility	Gene Ontology	GO:0048870	1	1255	0.996983	1	CLGN	http://amigo.geneontology.org/amigo/term/GO:0048870
regulation of synaptic transmission, glutamatergic	Gene Ontology	GO:0051966	1	1258	0.997025	1	GRM4	http://amigo.geneontology.org/amigo/term/GO:0051966
regulation of ion transport	Gene Ontology	GO:0043269	3	2137	0.997053	1	CACNA1H|TRH|KCNH1	http://amigo.geneontology.org/amigo/term/GO:0043269
regulation of humoral immune response	Gene Ontology	GO:0002920	1	1261	0.997066	1	CFB	http://amigo.geneontology.org/amigo/term/GO:0002920
muscle organ morphogenesis	Gene Ontology	GO:0048644	1	1269	0.997174	1	TNNI3	http://amigo.geneontology.org/amigo/term/GO:0048644
regulation of system process	Gene Ontology	GO:0044057	1	1284	0.997365	1	CGA	http://amigo.geneontology.org/amigo/term/GO:0044057
aromatic compound biosynthetic process	Gene Ontology	GO:0019438	2	1761	0.997394	1	AMH|PYDC1	http://amigo.geneontology.org/amigo/term/GO:0019438
negative regulation of immune system process	Gene Ontology	GO:0002683	1	1292	0.997462	1	BPIFB1	http://amigo.geneontology.org/amigo/term/GO:0002683
sensory perception of mechanical stimulus	Gene Ontology	GO:0050954	1	1297	0.997521	1	SLITRK6	http://amigo.geneontology.org/amigo/term/GO:0050954
actomyosin structure organization	Gene Ontology	GO:0031032	1	1308	0.997645	1	KISS1R	http://amigo.geneontology.org/amigo/term/GO:0031032
regulation of AMPA receptor activity	Gene Ontology	GO:2000311	1	1314	0.99771	1	CACNG4	http://amigo.geneontology.org/amigo/term/GO:2000311
negative regulation of cell differentiation	Gene Ontology	GO:0045596	1	1317	0.997742	1	TRIM72	http://amigo.geneontology.org/amigo/term/GO:0045596
catabolic process	Gene Ontology	GO:0009056	1	1322	0.997794	1	PYDC1	http://amigo.geneontology.org/amigo/term/GO:0009056
negative regulation of cell cycle process	Gene Ontology	GO:0010948	1	1322	0.997794	1	MUC1	http://amigo.geneontology.org/amigo/term/GO:0010948
ion homeostasis	Gene Ontology	GO:0050801	1	1323	0.997805	1	GNG3	http://amigo.geneontology.org/amigo/term/GO:0050801
memory	Gene Ontology	GO:0007613	1	1323	0.997805	1	SLC6A4	http://amigo.geneontology.org/amigo/term/GO:0007613
movement of cell or subcellular component	Gene Ontology	GO:0006928	1	1324	0.997815	1	CGA	http://amigo.geneontology.org/amigo/term/GO:0006928
embryo development ending in birth or egg hatching	Gene Ontology	GO:0009792	1	1335	0.997925	1	PAX2	http://amigo.geneontology.org/amigo/term/GO:0009792
acid secretion	Gene Ontology	GO:0046717	1	1335	0.997925	1	TRH	http://amigo.geneontology.org/amigo/term/GO:0046717
metal ion transport	Gene Ontology	GO:0030001	4	2610	0.997959	1	CACNG1|CALHM1|TNNI3|KCNE4	http://amigo.geneontology.org/amigo/term/GO:0030001
secretion by cell	Gene Ontology	GO:0032940	3	2244	0.998057	1	GRM4|APOA1|PYDC1	http://amigo.geneontology.org/amigo/term/GO:0032940
positive regulation of leukocyte activation	Gene Ontology	GO:0002696	1	1351	0.998074	1	PYDC1	http://amigo.geneontology.org/amigo/term/GO:0002696
positive regulation of cell activation	Gene Ontology	GO:0050867	1	1352	0.998083	1	PYDC1	http://amigo.geneontology.org/amigo/term/GO:0050867
regulation of T cell activation	Gene Ontology	GO:0050863	1	1357	0.998128	1	PYDC1	http://amigo.geneontology.org/amigo/term/GO:0050863
stem cell population maintenance	Gene Ontology	GO:0019827	1	1358	0.998136	1	PAX2	http://amigo.geneontology.org/amigo/term/GO:0019827
regulation of muscle system process	Gene Ontology	GO:0090257	1	1358	0.998136	1	TNNT1	http://amigo.geneontology.org/amigo/term/GO:0090257
neuron projection guidance	Gene Ontology	GO:0097485	1	1359	0.998145	1	UNC5A	http://amigo.geneontology.org/amigo/term/GO:0097485
behavior	Gene Ontology	GO:0007610	2	1845	0.99817	1	TRH|KLHL1	http://amigo.geneontology.org/amigo/term/GO:0007610
leukocyte migration	Gene Ontology	GO:0050900	1	1365	0.998196	1	PYDC1	http://amigo.geneontology.org/amigo/term/GO:0050900
cellular localization	Gene Ontology	GO:0051641	1	1392	0.998411	1	F7	http://amigo.geneontology.org/amigo/term/GO:0051641
G1/S transition of mitotic cell cycle	Gene Ontology	GO:0000082	1	1396	0.99844	1	MUC1	http://amigo.geneontology.org/amigo/term/GO:0000082
transmission of nerve impulse	Gene Ontology	GO:0019226	1	1406	0.998512	1	CACNG4	http://amigo.geneontology.org/amigo/term/GO:0019226
pallium development	Gene Ontology	GO:0021543	1	1413	0.99856	1	EMX1	http://amigo.geneontology.org/amigo/term/GO:0021543
complement activation	Gene Ontology	GO:0006956	1	1413	0.99856	1	CFB	http://amigo.geneontology.org/amigo/term/GO:0006956
cytokine production	Gene Ontology	GO:0001816	1	1416	0.99858	1	APOA1	http://amigo.geneontology.org/amigo/term/GO:0001816
multicellular organism development	Gene Ontology	GO:0007275	6	3422	0.998605	1	AMH|TRIM72|PTK6|SYT1|ROBO2|NEURL1	http://amigo.geneontology.org/amigo/term/GO:0007275
cellular response to DNA damage stimulus	Gene Ontology	GO:0006974	1	1420	0.998606	1	MUC1	http://amigo.geneontology.org/amigo/term/GO:0006974
regulation of vesicle-mediated transport	Gene Ontology	GO:0060627	2	1914	0.998633	1	RIMS4|SYT1	http://amigo.geneontology.org/amigo/term/GO:0060627
positive regulation of synaptic transmission	Gene Ontology	GO:0050806	1	1425	0.998638	1	KISS1R	http://amigo.geneontology.org/amigo/term/GO:0050806
organelle localization	Gene Ontology	GO:0051640	1	1429	0.998664	1	SYT1	http://amigo.geneontology.org/amigo/term/GO:0051640
microtubule-based process	Gene Ontology	GO:0007017	1	1436	0.998707	1	NEURL1	http://amigo.geneontology.org/amigo/term/GO:0007017
lymphocyte proliferation	Gene Ontology	GO:0046651	1	1439	0.998725	1	PYDC1	http://amigo.geneontology.org/amigo/term/GO:0046651
regulation of cell cycle phase transition	Gene Ontology	GO:1901987	1	1443	0.998749	1	MUC1	http://amigo.geneontology.org/amigo/term/GO:1901987
cell surface receptor signaling pathway	Gene Ontology	GO:0007166	4	2742	0.998751	1	SERPINA12|TSPAN1|FGFR3|PYDC1	http://amigo.geneontology.org/amigo/term/GO:0007166
amino acid transport	Gene Ontology	GO:0006865	1	1447	0.998772	1	TRH	http://amigo.geneontology.org/amigo/term/GO:0006865
neuron projection development	Gene Ontology	GO:0031175	2	1943	0.998792	1	SYT1|ROBO2	http://amigo.geneontology.org/amigo/term/GO:0031175
striated muscle tissue development	Gene Ontology	GO:0014706	1	1463	0.998861	1	FOXH1	http://amigo.geneontology.org/amigo/term/GO:0014706
response to stress	Gene Ontology	GO:0006950	4	2773	0.998888	1	PGLYRP2|SRMS|CFB|SSTR2	http://amigo.geneontology.org/amigo/term/GO:0006950
muscle tissue development	Gene Ontology	GO:0060537	1	1472	0.998908	1	TNNI3	http://amigo.geneontology.org/amigo/term/GO:0060537
nervous system process	Gene Ontology	GO:0050877	2	1969	0.998918	1	TPRN|SLC6A4	http://amigo.geneontology.org/amigo/term/GO:0050877
dendrite development	Gene Ontology	GO:0016358	1	1486	0.998977	1	MAPK8IP2	http://amigo.geneontology.org/amigo/term/GO:0016358
cell cycle process	Gene Ontology	GO:0022402	2	1985	0.99899	1	MUC1|MYOG	http://amigo.geneontology.org/amigo/term/GO:0022402
striated muscle contraction	Gene Ontology	GO:0006941	1	1492	0.999006	1	CGA	http://amigo.geneontology.org/amigo/term/GO:0006941
regulation of neuron projection development	Gene Ontology	GO:0010975	1	1494	0.999015	1	RET	http://amigo.geneontology.org/amigo/term/GO:0010975
muscle organ development	Gene Ontology	GO:0007517	1	1499	0.999038	1	TRIM72	http://amigo.geneontology.org/amigo/term/GO:0007517
cellular aromatic compound metabolic process	Gene Ontology	GO:0006725	3	2422	0.999039	1	AMH|MYOG|PAX2	http://amigo.geneontology.org/amigo/term/GO:0006725
organic hydroxy compound metabolic process	Gene Ontology	GO:1901615	1	1503	0.999056	1	DIO1	http://amigo.geneontology.org/amigo/term/GO:1901615
chemical homeostasis	Gene Ontology	GO:0048878	2	2002	0.99906	1	HSH2D|PAX2	http://amigo.geneontology.org/amigo/term/GO:0048878
muscle cell differentiation	Gene Ontology	GO:0042692	1	1508	0.999078	1	CACNA1H	http://amigo.geneontology.org/amigo/term/GO:0042692
adult behavior	Gene Ontology	GO:0030534	1	1513	0.999099	1	SLITRK6	http://amigo.geneontology.org/amigo/term/GO:0030534
hormone metabolic process	Gene Ontology	GO:0042445	1	1530	0.999168	1	CYP21A2	http://amigo.geneontology.org/amigo/term/GO:0042445
generation of neurons	Gene Ontology	GO:0048699	3	2465	0.99919	1	SLITRK6|CRABP2|SLC6A4	http://amigo.geneontology.org/amigo/term/GO:0048699
regulation of immune effector process	Gene Ontology	GO:0002697	1	1539	0.999202	1	PGLYRP2	http://amigo.geneontology.org/amigo/term/GO:0002697
ion transmembrane transport	Gene Ontology	GO:0034220	4	2865	0.999214	1	KCNJ3|CACNG4|TNNI3|SLC6A4	http://amigo.geneontology.org/amigo/term/GO:0034220
exocytosis	Gene Ontology	GO:0006887	2	2046	0.999221	1	RIMS4|RAB26	http://amigo.geneontology.org/amigo/term/GO:0006887
potassium ion transmembrane transport	Gene Ontology	GO:0071805	1	1545	0.999225	1	KCNJ3	http://amigo.geneontology.org/amigo/term/GO:0071805
membrane depolarization	Gene Ontology	GO:0051899	1	1557	0.999267	1	CACNA1H	http://amigo.geneontology.org/amigo/term/GO:0051899
defense response to other organism	Gene Ontology	GO:0098542	1	1562	0.999284	1	BPIFB1	http://amigo.geneontology.org/amigo/term/GO:0098542
small molecule metabolic process	Gene Ontology	GO:0044281	1	1584	0.999354	1	MALRD1	http://amigo.geneontology.org/amigo/term/GO:0044281
potassium ion transport	Gene Ontology	GO:0006813	1	1584	0.999354	1	KCNE4	http://amigo.geneontology.org/amigo/term/GO:0006813
forebrain development	Gene Ontology	GO:0030900	1	1585	0.999358	1	SLC6A4	http://amigo.geneontology.org/amigo/term/GO:0030900
regulation of secretion	Gene Ontology	GO:0051046	2	2091	0.999358	1	GHRH|PYDC1	http://amigo.geneontology.org/amigo/term/GO:0051046
wound healing	Gene Ontology	GO:0042060	1	1588	0.999367	1	TMPRSS6	http://amigo.geneontology.org/amigo/term/GO:0042060
immune system process	Gene Ontology	GO:0002376	4	2932	0.999391	1	IL20|BPIFB1|CST9|HSH2D	http://amigo.geneontology.org/amigo/term/GO:0002376
calcium ion transmembrane transport	Gene Ontology	GO:0070588	1	1597	0.999393	1	CACNG1	http://amigo.geneontology.org/amigo/term/GO:0070588
response to other organism	Gene Ontology	GO:0051707	1	1604	0.999412	1	CFB	http://amigo.geneontology.org/amigo/term/GO:0051707
neuron differentiation	Gene Ontology	GO:0030182	2	2118	0.999428	1	MAPK8IP2|SLC6A4	http://amigo.geneontology.org/amigo/term/GO:0030182
regulation of multicellular organismal development	Gene Ontology	GO:2000026	2	2125	0.999445	1	PGLYRP2|SLC6A4	http://amigo.geneontology.org/amigo/term/GO:2000026
nucleic acid metabolic process	Gene Ontology	GO:0090304	3	2578	0.999486	1	MUC1|HOXB1|MYT1	http://amigo.geneontology.org/amigo/term/GO:0090304
positive regulation of transport	Gene Ontology	GO:0051050	1	1636	0.999495	1	TSPAN1	http://amigo.geneontology.org/amigo/term/GO:0051050
lymphocyte activation	Gene Ontology	GO:0046649	1	1671	0.999571	1	PYDC1	http://amigo.geneontology.org/amigo/term/GO:0046649
axonogenesis	Gene Ontology	GO:0007409	1	1683	0.999595	1	PAX2	http://amigo.geneontology.org/amigo/term/GO:0007409
cell morphogenesis involved in neuron differentiation	Gene Ontology	GO:0048667	1	1685	0.999599	1	LRFN2	http://amigo.geneontology.org/amigo/term/GO:0048667
synapse organization	Gene Ontology	GO:0050808	1	1688	0.999604	1	SLITRK6	http://amigo.geneontology.org/amigo/term/GO:0050808
neurotransmitter secretion	Gene Ontology	GO:0007269	1	1691	0.99961	1	SYT9	http://amigo.geneontology.org/amigo/term/GO:0007269
cilium movement	Gene Ontology	GO:0003341	1	1701	0.999628	1	CCDC151	http://amigo.geneontology.org/amigo/term/GO:0003341
cellular macromolecule biosynthetic process	Gene Ontology	GO:0034645	2	2221	0.999633	1	NAT1|HS6ST3	http://amigo.geneontology.org/amigo/term/GO:0034645
regulation of cellular macromolecule biosynthetic process	Gene Ontology	GO:2000112	1	1718	0.999656	1	CRABP2	http://amigo.geneontology.org/amigo/term/GO:2000112
divalent inorganic cation transport	Gene Ontology	GO:0072511	1	1728	0.999672	1	SLC30A8	http://amigo.geneontology.org/amigo/term/GO:0072511
cell part morphogenesis	Gene Ontology	GO:0032990	1	1758	0.999715	1	SYT1	http://amigo.geneontology.org/amigo/term/GO:0032990
regulation of nucleobase-containing compound metabolic process	Gene Ontology	GO:0019219	1	1764	0.999723	1	TMPRSS6	http://amigo.geneontology.org/amigo/term/GO:0019219
immune response-regulating signaling pathway	Gene Ontology	GO:0002764	1	1769	0.99973	1	BPIFB1	http://amigo.geneontology.org/amigo/term/GO:0002764
cellular component morphogenesis	Gene Ontology	GO:0032989	1	1771	0.999732	1	HPN	http://amigo.geneontology.org/amigo/term/GO:0032989
macromolecule biosynthetic process	Gene Ontology	GO:0009059	2	2307	0.999748	1	ZDHHC22|ARNT2	http://amigo.geneontology.org/amigo/term/GO:0009059
actin filament-based process	Gene Ontology	GO:0030029	1	1790	0.999755	1	TNNI3	http://amigo.geneontology.org/amigo/term/GO:0030029
response to external stimulus	Gene Ontology	GO:0009605	2	2322	0.999764	1	CST9|SLC30A8	http://amigo.geneontology.org/amigo/term/GO:0009605
cell-cell signaling	Gene Ontology	GO:0007267	2	2334	0.999776	1	HTR1E|PYY	http://amigo.geneontology.org/amigo/term/GO:0007267
regulation of membrane potential	Gene Ontology	GO:0042391	2	2346	0.999787	1	GRIA2|KCNH1	http://amigo.geneontology.org/amigo/term/GO:0042391
regulation of nervous system development	Gene Ontology	GO:0051960	2	2353	0.999793	1	SLC6A4|EMX1	http://amigo.geneontology.org/amigo/term/GO:0051960
calcium ion transport	Gene Ontology	GO:0006816	1	1840	0.999807	1	CACNA1H	http://amigo.geneontology.org/amigo/term/GO:0006816
DNA metabolic process	Gene Ontology	GO:0006259	1	1854	0.999819	1	DNASE1L2	http://amigo.geneontology.org/amigo/term/GO:0006259
male sex differentiation	Gene Ontology	GO:0046661	1	1896	0.999852	1	AMH	http://amigo.geneontology.org/amigo/term/GO:0046661
cell activation	Gene Ontology	GO:0001775	1	1898	0.999853	1	PGLYRP2	http://amigo.geneontology.org/amigo/term/GO:0001775
positive regulation of immune system process	Gene Ontology	GO:0002684	2	2433	0.999854	1	IL20|BPIFB1	http://amigo.geneontology.org/amigo/term/GO:0002684
transmembrane transport	Gene Ontology	GO:0055085	4	3323	0.999867	1	PEX5L|CALHM1|MAPK8IP2|SLC6A4	http://amigo.geneontology.org/amigo/term/GO:0055085
nucleobase-containing compound metabolic process	Gene Ontology	GO:0006139	2	2479	0.999881	1	FOXH1|MYT1	http://amigo.geneontology.org/amigo/term/GO:0006139
G protein-coupled receptor signaling pathway	Gene Ontology	GO:0007186	2	2482	0.999883	1	CGA|GPRC5A	http://amigo.geneontology.org/amigo/term/GO:0007186
regulation of exocytosis	Gene Ontology	GO:0017157	1	1950	0.999885	1	SYT9	http://amigo.geneontology.org/amigo/term/GO:0017157
nervous system development	Gene Ontology	GO:0007399	4	3440	0.999917	1	NEURL1|GHRH|PARD6B|MAPK8IP2	http://amigo.geneontology.org/amigo/term/GO:0007399
regulation of transmembrane transport	Gene Ontology	GO:0034762	1	2021	0.999918	1	KCNF1	http://amigo.geneontology.org/amigo/term/GO:0034762
positive regulation of immune response	Gene Ontology	GO:0050778	1	2025	0.999919	1	PGLYRP2	http://amigo.geneontology.org/amigo/term/GO:0050778
reproductive system development	Gene Ontology	GO:0061458	2	2570	0.99992	1	AMH|BMPR1B	http://amigo.geneontology.org/amigo/term/GO:0061458
regulation of immune response	Gene Ontology	GO:0050776	1	2071	0.999935	1	PYDC1	http://amigo.geneontology.org/amigo/term/GO:0050776
response to wounding	Gene Ontology	GO:0009611	1	2133	0.999952	1	APOA1	http://amigo.geneontology.org/amigo/term/GO:0009611
inflammatory response	Gene Ontology	GO:0006954	1	2187	0.999963	1	PGLYRP2	http://amigo.geneontology.org/amigo/term/GO:0006954
anion transport	Gene Ontology	GO:0006820	2	2780	0.999969	1	SLC7A13|SLC16A6	http://amigo.geneontology.org/amigo/term/GO:0006820
immune response	Gene Ontology	GO:0006955	2	2792	0.99997	1	SLC30A8|TNFRSF18	http://amigo.geneontology.org/amigo/term/GO:0006955
cell development	Gene Ontology	GO:0048468	3	3348	0.999979	1	AMH|APOA1|PTK6	http://amigo.geneontology.org/amigo/term/GO:0048468
oogenesis	Gene Ontology	GO:0048477	2	2944	0.999985	1	AMH|BMPR1B	http://amigo.geneontology.org/amigo/term/GO:0048477
monovalent inorganic cation transport	Gene Ontology	GO:0015672	1	2392	0.999986	1	KCNJ3	http://amigo.geneontology.org/amigo/term/GO:0015672
organic anion transport	Gene Ontology	GO:0015711	1	2449	0.999989	1	APOA1	http://amigo.geneontology.org/amigo/term/GO:0015711
system process	Gene Ontology	GO:0003008	3	3535	0.999991	1	CACNG4|CCDC78|PAX2	http://amigo.geneontology.org/amigo/term/GO:0003008
carboxylic acid transport	Gene Ontology	GO:0046942	1	2486	0.999991	1	SLC16A6	http://amigo.geneontology.org/amigo/term/GO:0046942
chromosome organization	Gene Ontology	GO:0051276	1	2520	0.999992	1	HYPM	http://amigo.geneontology.org/amigo/term/GO:0051276
defense response	Gene Ontology	GO:0006952	2	3150	0.999994	1	IL20|TFF3	http://amigo.geneontology.org/amigo/term/GO:0006952
multi-organism process	Gene Ontology	GO:0051704	4	4668	0.999999	1	CLGN|CST9|HPN|SSTR2	http://amigo.geneontology.org/amigo/term/GO:0051704
reproductive process	Gene Ontology	GO:0022414	2	3781	1	1	ROBO2|MTL5	http://amigo.geneontology.org/amigo/term/GO:0022414
spermatid differentiation	Gene Ontology	GO:0048515	1	3256	1	1	NEURL1	http://amigo.geneontology.org/amigo/term/GO:0048515
spermatid development	Gene Ontology	GO:0007286	1	3261	1	1	NEURL1	http://amigo.geneontology.org/amigo/term/GO:0007286
cellular process involved in reproduction in multicellular organism	Gene Ontology	GO:0022412	1	3301	1	1	BMPR1B	http://amigo.geneontology.org/amigo/term/GO:0022412
cell recognition	Gene Ontology	GO:0008037	1	3316	1	1	ROBO2	http://amigo.geneontology.org/amigo/term/GO:0008037
ion transport	Gene Ontology	GO:0006811	1	3415	1	1	LCN12	http://amigo.geneontology.org/amigo/term/GO:0006811
gonad development	Gene Ontology	GO:0008406	1	3418	1	1	BMPR1B	http://amigo.geneontology.org/amigo/term/GO:0008406
multicellular organism reproduction	Gene Ontology	GO:0032504	1	3566	1	1	MAPK8IP2	http://amigo.geneontology.org/amigo/term/GO:0032504
male gamete generation	Gene Ontology	GO:0048232	1	3622	1	1	MTL5	http://amigo.geneontology.org/amigo/term/GO:0048232
multicellular organismal reproductive process	Gene Ontology	GO:0048609	1	3625	1	1	AMH	http://amigo.geneontology.org/amigo/term/GO:0048609
gamete generation	Gene Ontology	GO:0007276	1	3626	1	1	MTL5	http://amigo.geneontology.org/amigo/term/GO:0007276
reproduction	Gene Ontology	GO:0000003	2	4260	1	1	CGA|NEURL1	http://amigo.geneontology.org/amigo/term/GO:0000003
multi-organism reproductive process	Gene Ontology	GO:0044703	1	3644	1	1	MTL5	http://amigo.geneontology.org/amigo/term/GO:0044703
sexual reproduction	Gene Ontology	GO:0019953	1	3667	1	1	SLC6A4	http://amigo.geneontology.org/amigo/term/GO:0019953
--------------------

## Sheet: Brown module KEGG 
#Term	Database	ID	Input number	Background number	P-Value	Corrected P-Value	Input	Hyperlink
Neuroactive ligand-receptor interaction	KEGG PATHWAY	hsa04080	9	338	3.51945e-05	0.00965887	KISS1R|GHRH|PYY|GRIA2|PRLH|SSTR2|GRM4|HTR1E|TRH	http://www.genome.jp/kegg-bin/show_pathway?hsa04080/hsa:6752%09red/hsa:2691%09red/hsa:7200%09red/hsa:2891%09red/hsa:84634%09red/hsa:51052%09red/hsa:3354%09red/hsa:5697%09red/hsa:2914%09red
Dopaminergic synapse	KEGG PATHWAY	hsa04728	6	131	4.22532e-05	0.00965887	KCNJ3|CALY|GRIA2|GNG13|CREB3L1|GNG3	http://www.genome.jp/kegg-bin/show_pathway?hsa04728/hsa:51764%09red/hsa:2785%09red/hsa:2891%09red/hsa:3760%09red/hsa:90993%09red/hsa:50632%09red
Estrogen signaling pathway	KEGG PATHWAY	hsa04915	6	138	5.57913e-05	0.00965887	KCNJ3|KRT31|KRT35|TFF1|KRT37|CREB3L1	http://www.genome.jp/kegg-bin/show_pathway?hsa04915/hsa:3886%09red/hsa:3881%09red/hsa:3760%09red/hsa:90993%09red/hsa:8688%09red/hsa:7031%09red
Circadian entrainment	KEGG PATHWAY	hsa04713	5	97	0.00011	0.0156339	GRIA2|CACNA1H|GNG13|GNG3|KCNJ3	http://www.genome.jp/kegg-bin/show_pathway?hsa04713/hsa:8912%09red/hsa:51764%09red/hsa:2785%09red/hsa:2891%09red/hsa:3760%09red
Glutamatergic synapse	KEGG PATHWAY	hsa04724	5	114	0.000226518	0.0203851	GRIA2|KCNJ3|GRM4|GNG3|GNG13	http://www.genome.jp/kegg-bin/show_pathway?hsa04724/hsa:2914%09red/hsa:3760%09red/hsa:51764%09red/hsa:2785%09red/hsa:2891%09red
Serotonergic synapse	KEGG PATHWAY	hsa04726	5	115	0.000235496	0.0203851	KCNJ3|HTR1E|SLC6A4|GNG3|GNG13	http://www.genome.jp/kegg-bin/show_pathway?hsa04726/hsa:3760%09red/hsa:51764%09red/hsa:6532%09red/hsa:2785%09red/hsa:3354%09red
Metabolism of xenobiotics by cytochrome P450	KEGG PATHWAY	hsa00980	4	76	0.000508416	0.0335312	CYP2A13|AKR7A3|CYP2B6|GSTA3	http://www.genome.jp/kegg-bin/show_pathway?hsa00980/hsa:22977%09red/hsa:1555%09red/hsa:1553%09red/hsa:2940%09red
cAMP signaling pathway	KEGG PATHWAY	hsa04024	6	214	0.000552365	0.0347739	AMH|GRIA2|SSTR2|CREB3L1|TNNI3|HTR1E	http://www.genome.jp/kegg-bin/show_pathway?hsa04024/hsa:6752%09red/hsa:7137%09red/hsa:2891%09red/hsa:3354%09red/hsa:268%09red/hsa:90993%09red
Taste transduction	KEGG PATHWAY	hsa04742	4	83	0.000697941	0.0404173	GRM4|HTR1E|CALHM1|GNG13	http://www.genome.jp/kegg-bin/show_pathway?hsa04742/hsa:51764%09red/hsa:255022%09red/hsa:2914%09red/hsa:3354%09red
Cardiac muscle contraction	KEGG PATHWAY	hsa04260	4	86	0.000792695	0.0406623	CACNG1|CACNG4|TNNI3|COX6C	http://www.genome.jp/kegg-bin/show_pathway?hsa04260/hsa:786%09red/hsa:7137%09red/hsa:27092%09red/hsa:1345%09red
Tight junction	KEGG PATHWAY	hsa04530	5	170	0.0013031	0.0556383	TUBA3C|TUBA3E|TUBA3D|CLDN25|PARD6B	http://www.genome.jp/kegg-bin/show_pathway?hsa04530/hsa:84612%09red/hsa:112714%09red/hsa:113457%09red/hsa:7278%09red/hsa:644672%09red
Cholinergic synapse	KEGG PATHWAY	hsa04725	4	112	0.00202564	0.0738292	KCNJ3|CREB3L1|GNG3|GNG13	http://www.genome.jp/kegg-bin/show_pathway?hsa04725/hsa:3760%09red/hsa:90993%09red/hsa:51764%09red/hsa:2785%09red
Pathogenic Escherichia coli infection	KEGG PATHWAY	hsa05130	3	55	0.00240111	0.0773379	TUBA3C|TUBA3E|TUBA3D	http://www.genome.jp/kegg-bin/show_pathway?hsa05130/hsa:112714%09red/hsa:7278%09red/hsa:113457%09red
Relaxin signaling pathway	KEGG PATHWAY	hsa04926	4	130	0.00340872	0.0944215	CLGN|CREB3L1|GNG3|GNG13	http://www.genome.jp/kegg-bin/show_pathway?hsa04926/hsa:4312%09red/hsa:90993%09red/hsa:51764%09red/hsa:2785%09red
Cortisol synthesis and secretion	KEGG PATHWAY	hsa04927	3	65	0.0037717	0.100458	CACNA1H|CYP21A2|CREB3L1	http://www.genome.jp/kegg-bin/show_pathway?hsa04927/hsa:1589%09red/hsa:8912%09red/hsa:90993%09red
Retrograde endocannabinoid signaling	KEGG PATHWAY	hsa04723	4	148	0.00532514	0.120907	GRIA2|KCNJ3|GNG3|GNG13	http://www.genome.jp/kegg-bin/show_pathway?hsa04723/hsa:3760%09red/hsa:51764%09red/hsa:2785%09red/hsa:2891%09red
Adrenergic signaling in cardiomyocytes	KEGG PATHWAY	hsa04261	4	149	0.00544889	0.121721	CACNG1|CREB3L1|CACNG4|TNNI3	http://www.genome.jp/kegg-bin/show_pathway?hsa04261/hsa:786%09red/hsa:7137%09red/hsa:90993%09red/hsa:27092%09red
Gap junction	KEGG PATHWAY	hsa04540	3	88	0.00846904	0.158508	TUBA3C|TUBA3E|TUBA3D	http://www.genome.jp/kegg-bin/show_pathway?hsa04540/hsa:112714%09red/hsa:7278%09red/hsa:113457%09red
Hypertrophic cardiomyopathy (HCM)	KEGG PATHWAY	hsa05410	3	90	0.00898647	0.163767	CACNG1|CACNG4|TNNI3	http://www.genome.jp/kegg-bin/show_pathway?hsa05410/hsa:786%09red/hsa:7137%09red/hsa:27092%09red
Morphine addiction	KEGG PATHWAY	hsa05032	3	91	0.00925198	0.166416	KCNJ3|GNG3|GNG13	http://www.genome.jp/kegg-bin/show_pathway?hsa05032/hsa:3760%09red/hsa:51764%09red/hsa:2785%09red
Axon guidance	KEGG PATHWAY	hsa04360	4	181	0.0104817	0.183761	BMPR1B|ROBO2|PARD6B|UNC5A	http://www.genome.jp/kegg-bin/show_pathway?hsa04360/hsa:658%09red/hsa:6092%09red/hsa:84612%09red/hsa:90249%09red
Dilated cardiomyopathy (DCM)	KEGG PATHWAY	hsa05414	3	96	0.010648	0.184344	CACNG1|CACNG4|TNNI3	http://www.genome.jp/kegg-bin/show_pathway?hsa05414/hsa:786%09red/hsa:7137%09red/hsa:27092%09red
Aldosterone synthesis and secretion	KEGG PATHWAY	hsa04925	3	98	0.0112387	0.192168	CACNA1H|CYP21A2|CREB3L1	http://www.genome.jp/kegg-bin/show_pathway?hsa04925/hsa:1589%09red/hsa:8912%09red/hsa:90993%09red
Pathways in cancer	KEGG PATHWAY	hsa05200	7	530	0.0121534	0.201552	RET|GNG13|CLGN|GNG3|GSTA3|FGFR3|ARNT2	http://www.genome.jp/kegg-bin/show_pathway?hsa05200/hsa:2940%09red/hsa:51764%09red/hsa:4312%09red/hsa:2785%09red/hsa:9915%09red/hsa:2261%09red/hsa:5979%09red
Cytokine-cytokine receptor interaction	KEGG PATHWAY	hsa04060	5	294	0.0123696	0.201552	AMH|BMPR1B|GDF15|TNFRSF18|IL20	http://www.genome.jp/kegg-bin/show_pathway?hsa04060/hsa:658%09red/hsa:268%09red/hsa:9518%09red/hsa:50604%09red/hsa:8784%09red
MAPK signaling pathway	KEGG PATHWAY	hsa04010	5	295	0.0125339	0.201854	CACNA1H|CACNG1|CACNG4|FGFR3|MAPK8IP2	http://www.genome.jp/kegg-bin/show_pathway?hsa04010/hsa:786%09red/hsa:8912%09red/hsa:27092%09red/hsa:2261%09red/hsa:23542%09red
Bladder cancer	KEGG PATHWAY	hsa05219	2	41	0.0165309	0.241003	CLGN|FGFR3	http://www.genome.jp/kegg-bin/show_pathway?hsa05219/hsa:4312%09red/hsa:2261%09red
Fat digestion and absorption	KEGG PATHWAY	hsa04975	2	41	0.0165309	0.241003	PNLIPRP2|APOA1	http://www.genome.jp/kegg-bin/show_pathway?hsa04975/hsa:5408%09red/hsa:335%09red
Cocaine addiction	KEGG PATHWAY	hsa05030	2	49	0.0227928	0.277696	GRIA2|CREB3L1	http://www.genome.jp/kegg-bin/show_pathway?hsa05030/hsa:90993%09red/hsa:2891%09red
PI3K-Akt signaling pathway	KEGG PATHWAY	hsa04151	5	354	0.0250054	0.277696	CREB3L1|GNG13|GNG3|FGFR3|EIF4E1B	http://www.genome.jp/kegg-bin/show_pathway?hsa04151/hsa:90993%09red/hsa:51764%09red/hsa:253314%09red/hsa:2785%09red/hsa:2261%09red
Apoptosis	KEGG PATHWAY	hsa04210	3	136	0.0260592	0.277696	TUBA3C|TUBA3E|TUBA3D	http://www.genome.jp/kegg-bin/show_pathway?hsa04210/hsa:112714%09red/hsa:7278%09red/hsa:113457%09red
Phenylalanine, tyrosine and tryptophan biosynthesis	KEGG PATHWAY	hsa00400	1	5	0.0270431	0.277696	PAH	http://www.genome.jp/kegg-bin/show_pathway?hsa00400/hsa:5053%09red
Signaling pathways regulating pluripotency of stem cells	KEGG PATHWAY	hsa04550	3	140	0.0280215	0.277696	BMPR1B|HOXB1|FGFR3	http://www.genome.jp/kegg-bin/show_pathway?hsa04550/hsa:658%09red/hsa:3211%09red/hsa:2261%09red
Phagosome	KEGG PATHWAY	hsa04145	3	152	0.034366	0.282154	TUBA3C|TUBA3E|TUBA3D	http://www.genome.jp/kegg-bin/show_pathway?hsa04145/hsa:112714%09red/hsa:7278%09red/hsa:113457%09red
Oxytocin signaling pathway	KEGG PATHWAY	hsa04921	3	153	0.0349255	0.282154	KCNJ3|CACNG1|CACNG4	http://www.genome.jp/kegg-bin/show_pathway?hsa04921/hsa:786%09red/hsa:3760%09red/hsa:27092%09red
Hippo signaling pathway	KEGG PATHWAY	hsa04390	3	154	0.0354897	0.282154	AMH|BMPR1B|PARD6B	http://www.genome.jp/kegg-bin/show_pathway?hsa04390/hsa:658%09red/hsa:268%09red/hsa:84612%09red
Cushing syndrome	KEGG PATHWAY	hsa04934	3	155	0.0360586	0.282154	CACNA1H|CYP21A2|CREB3L1	http://www.genome.jp/kegg-bin/show_pathway?hsa04934/hsa:1589%09red/hsa:8912%09red/hsa:90993%09red
Amphetamine addiction	KEGG PATHWAY	hsa05031	2	68	0.0408152	0.289893	GRIA2|CREB3L1	http://www.genome.jp/kegg-bin/show_pathway?hsa05031/hsa:90993%09red/hsa:2891%09red
Central carbon metabolism in cancer	KEGG PATHWAY	hsa05230	2	69	0.0418748	0.292341	FGFR3|RET	http://www.genome.jp/kegg-bin/show_pathway?hsa05230/hsa:5979%09red/hsa:2261%09red
RNA transport	KEGG PATHWAY	hsa03013	3	165	0.0420042	0.292341	EEF1A2|NAT1|EIF4E1B	http://www.genome.jp/kegg-bin/show_pathway?hsa03013/hsa:1917%09red/hsa:1982%09red/hsa:253314%09red
Drug metabolism - cytochrome P450	KEGG PATHWAY	hsa00982	2	72	0.0451148	0.296133	CYP2B6|GSTA3	http://www.genome.jp/kegg-bin/show_pathway?hsa00982/hsa:2940%09red/hsa:1555%09red
PPAR signaling pathway	KEGG PATHWAY	hsa03320	2	76	0.0495733	0.304117	CLGN|APOA1	http://www.genome.jp/kegg-bin/show_pathway?hsa03320/hsa:4312%09red/hsa:335%09red
Arrhythmogenic right ventricular cardiomyopathy (ARVC)	KEGG PATHWAY	hsa05412	2	77	0.0507119	0.304117	CACNG1|CACNG4	http://www.genome.jp/kegg-bin/show_pathway?hsa05412/hsa:786%09red/hsa:27092%09red
Alcoholism	KEGG PATHWAY	hsa05034	3	180	0.0517814	0.304117	CREB3L1|GNG3|GNG13	http://www.genome.jp/kegg-bin/show_pathway?hsa05034/hsa:90993%09red/hsa:51764%09red/hsa:2785%09red
Synaptic vesicle cycle	KEGG PATHWAY	hsa04721	2	78	0.0518599	0.304117	SYT1|SLC6A4	http://www.genome.jp/kegg-bin/show_pathway?hsa04721/hsa:6857%09red/hsa:6532%09red
Complement and coagulation cascades	KEGG PATHWAY	hsa04610	2	79	0.0530171	0.304117	CFB|F7	http://www.genome.jp/kegg-bin/show_pathway?hsa04610/hsa:629%09red/hsa:2155%09red
EGFR tyrosine kinase inhibitor resistance	KEGG PATHWAY	hsa01521	2	79	0.0530171	0.304117	FGFR3|EIF4E1B	http://www.genome.jp/kegg-bin/show_pathway?hsa01521/hsa:2261%09red/hsa:253314%09red
Chemical carcinogenesis	KEGG PATHWAY	hsa05204	2	82	0.0565433	0.314823	CYP2A13|GSTA3	http://www.genome.jp/kegg-bin/show_pathway?hsa05204/hsa:2940%09red/hsa:1553%09red
GABAergic synapse	KEGG PATHWAY	hsa04727	2	89	0.0650758	0.337565	GNG3|GNG13	http://www.genome.jp/kegg-bin/show_pathway?hsa04727/hsa:51764%09red/hsa:2785%09red
Longevity regulating pathway	KEGG PATHWAY	hsa04211	2	89	0.0650758	0.337565	CREB3L1|EIF4E1B	http://www.genome.jp/kegg-bin/show_pathway?hsa04211/hsa:90993%09red/hsa:253314%09red
IL-17 signaling pathway	KEGG PATHWAY	hsa04657	2	93	0.0701325	0.348751	MAPK15|CLGN	http://www.genome.jp/kegg-bin/show_pathway?hsa04657/hsa:225689%09red/hsa:4312%09red
TGF-beta signaling pathway	KEGG PATHWAY	hsa04350	2	94	0.0714162	0.35075	AMH|BMPR1B	http://www.genome.jp/kegg-bin/show_pathway?hsa04350/hsa:658%09red/hsa:268%09red
Pancreatic secretion	KEGG PATHWAY	hsa04972	2	98	0.0766266	0.362211	PNLIPRP2|CPB1	http://www.genome.jp/kegg-bin/show_pathway?hsa04972/hsa:1360%09red/hsa:5408%09red
Phenylalanine metabolism	KEGG PATHWAY	hsa00360	1	17	0.0789632	0.365766	PAH	http://www.genome.jp/kegg-bin/show_pathway?hsa00360/hsa:5053%09red
Human cytomegalovirus infection	KEGG PATHWAY	hsa05163	3	225	0.086891	0.379221	CREB3L1|GNG3|GNG13	http://www.genome.jp/kegg-bin/show_pathway?hsa05163/hsa:90993%09red/hsa:51764%09red/hsa:2785%09red
Ras signaling pathway	KEGG PATHWAY	hsa04014	3	232	0.0930683	0.395398	GNG13|GNG3|FGFR3	http://www.genome.jp/kegg-bin/show_pathway?hsa04014/hsa:51764%09red/hsa:2261%09red/hsa:2785%09red
Vitamin digestion and absorption	KEGG PATHWAY	hsa04977	1	24	0.107966	0.424553	APOA1	http://www.genome.jp/kegg-bin/show_pathway?hsa04977/hsa:335%09red
Glycosaminoglycan biosynthesis - heparan sulfate / heparin	KEGG PATHWAY	hsa00534	1	24	0.107966	0.424553	HS6ST3	http://www.genome.jp/kegg-bin/show_pathway?hsa00534/hsa:266722%09red
Folate biosynthesis	KEGG PATHWAY	hsa00790	1	26	0.116084	0.429882	PAH	http://www.genome.jp/kegg-bin/show_pathway?hsa00790/hsa:5053%09red
Apelin signaling pathway	KEGG PATHWAY	hsa04371	2	137	0.132665	0.460502	GNG3|GNG13	http://www.genome.jp/kegg-bin/show_pathway?hsa04371/hsa:51764%09red/hsa:2785%09red
Fluid shear stress and atherosclerosis	KEGG PATHWAY	hsa05418	2	139	0.135745	0.465285	BMPR1B|GSTA3	http://www.genome.jp/kegg-bin/show_pathway?hsa05418/hsa:658%09red/hsa:2940%09red
Thyroid cancer	KEGG PATHWAY	hsa05216	1	37	0.159435	0.503	RET	http://www.genome.jp/kegg-bin/show_pathway?hsa05216/hsa:5979%09red
African trypanosomiasis	KEGG PATHWAY	hsa05143	1	37	0.159435	0.503	APOA1	http://www.genome.jp/kegg-bin/show_pathway?hsa05143/hsa:335%09red
Nicotine addiction	KEGG PATHWAY	hsa05033	1	40	0.170886	0.512114	GRIA2	http://www.genome.jp/kegg-bin/show_pathway?hsa05033/hsa:2891%09red
Vasopressin-regulated water reabsorption	KEGG PATHWAY	hsa04962	1	44	0.185912	0.537717	CREB3L1	http://www.genome.jp/kegg-bin/show_pathway?hsa04962/hsa:90993%09red
Sphingolipid metabolism	KEGG PATHWAY	hsa00600	1	47	0.197004	0.550102	DEGS2	http://www.genome.jp/kegg-bin/show_pathway?hsa00600/hsa:123099%09red
Cholesterol metabolism	KEGG PATHWAY	hsa04979	1	50	0.207945	0.570305	APOA1	http://www.genome.jp/kegg-bin/show_pathway?hsa04979/hsa:335%09red
Amyotrophic lateral sclerosis (ALS)	KEGG PATHWAY	hsa05014	1	51	0.211559	0.575837	GRIA2	http://www.genome.jp/kegg-bin/show_pathway?hsa05014/hsa:2891%09red
Kaposi sarcoma-associated herpesvirus infection	KEGG PATHWAY	hsa05167	2	186	0.211625	0.575837	GNG3|GNG13	http://www.genome.jp/kegg-bin/show_pathway?hsa05167/hsa:51764%09red/hsa:2785%09red
Chemokine signaling pathway	KEGG PATHWAY	hsa04062	2	190	0.218292	0.589401	GNG3|GNG13	http://www.genome.jp/kegg-bin/show_pathway?hsa04062/hsa:51764%09red/hsa:2785%09red
Mineral absorption	KEGG PATHWAY	hsa04978	1	53	0.218738	0.589401	S100G	http://www.genome.jp/kegg-bin/show_pathway?hsa04978/hsa:795%09red
Huntington disease	KEGG PATHWAY	hsa05016	2	193	0.223303	0.597056	CREB3L1|COX6C	http://www.genome.jp/kegg-bin/show_pathway?hsa05016/hsa:90993%09red/hsa:1345%09red
Legionellosis	KEGG PATHWAY	hsa05134	1	55	0.225851	0.600392	EEF1A2	http://www.genome.jp/kegg-bin/show_pathway?hsa05134/hsa:1917%09red
Glutathione metabolism	KEGG PATHWAY	hsa00480	1	56	0.229384	0.607451	GSTA3	http://www.genome.jp/kegg-bin/show_pathway?hsa00480/hsa:2940%09red
Pyrimidine metabolism	KEGG PATHWAY	hsa00240	1	57	0.2329	0.612082	ENTPD8	http://www.genome.jp/kegg-bin/show_pathway?hsa00240/hsa:377841%09red
Viral carcinogenesis	KEGG PATHWAY	hsa05203	2	201	0.236708	0.615086	CREB3L1|HPN	http://www.genome.jp/kegg-bin/show_pathway?hsa05203/hsa:3249%09red/hsa:90993%09red
Steroid hormone biosynthesis	KEGG PATHWAY	hsa00140	1	60	0.243354	0.624159	CYP21A2	http://www.genome.jp/kegg-bin/show_pathway?hsa00140/hsa:1589%09red
Viral myocarditis	KEGG PATHWAY	hsa05416	1	60	0.243354	0.624159	NAT1	http://www.genome.jp/kegg-bin/show_pathway?hsa05416/hsa:1982%09red
Long-term depression	KEGG PATHWAY	hsa04730	1	60	0.243354	0.624159	GRIA2	http://www.genome.jp/kegg-bin/show_pathway?hsa04730/hsa:2891%09red
Glycerolipid metabolism	KEGG PATHWAY	hsa00561	1	61	0.246807	0.62836	PNLIPRP2	http://www.genome.jp/kegg-bin/show_pathway?hsa00561/hsa:5408%09red
Rap1 signaling pathway	KEGG PATHWAY	hsa04015	2	210	0.251838	0.637651	FGFR3|PARD6B	http://www.genome.jp/kegg-bin/show_pathway?hsa04015/hsa:84612%09red/hsa:2261%09red
Arachidonic acid metabolism	KEGG PATHWAY	hsa00590	1	63	0.253666	0.639941	CYP2B6	http://www.genome.jp/kegg-bin/show_pathway?hsa00590/hsa:1555%09red
Human immunodeficiency virus 1 infection	KEGG PATHWAY	hsa05170	2	212	0.255204	0.640321	GNG3|GNG13	http://www.genome.jp/kegg-bin/show_pathway?hsa05170/hsa:51764%09red/hsa:2785%09red
Regulation of actin cytoskeleton	KEGG PATHWAY	hsa04810	2	214	0.258571	0.641888	FGFR3|FGD3	http://www.genome.jp/kegg-bin/show_pathway?hsa04810/hsa:89846%09red/hsa:2261%09red
Retinol metabolism	KEGG PATHWAY	hsa00830	1	67	0.267198	0.650385	CYP2B6	http://www.genome.jp/kegg-bin/show_pathway?hsa00830/hsa:1555%09red
Long-term potentiation	KEGG PATHWAY	hsa04720	1	67	0.267198	0.650385	GRIA2	http://www.genome.jp/kegg-bin/show_pathway?hsa04720/hsa:2891%09red
Staphylococcus aureus infection	KEGG PATHWAY	hsa05150	1	68	0.270543	0.655073	CFB	http://www.genome.jp/kegg-bin/show_pathway?hsa05150/hsa:629%09red
Renal cell carcinoma	KEGG PATHWAY	hsa05211	1	69	0.273872	0.659674	ARNT2	http://www.genome.jp/kegg-bin/show_pathway?hsa05211/hsa:9915%09red
Platinum drug resistance	KEGG PATHWAY	hsa01524	1	73	0.287039	0.676457	GSTA3	http://www.genome.jp/kegg-bin/show_pathway?hsa01524/hsa:2940%09red
Thermogenesis	KEGG PATHWAY	hsa04714	2	231	0.287189	0.676457	CREB3L1|COX6C	http://www.genome.jp/kegg-bin/show_pathway?hsa04714/hsa:90993%09red/hsa:1345%09red
Thyroid hormone synthesis	KEGG PATHWAY	hsa04918	1	74	0.290293	0.680298	CREB3L1	http://www.genome.jp/kegg-bin/show_pathway?hsa04918/hsa:90993%09red
Gastric acid secretion	KEGG PATHWAY	hsa04971	1	75	0.293533	0.682957	SSTR2	http://www.genome.jp/kegg-bin/show_pathway?hsa04971/hsa:6752%09red
Biosynthesis of amino acids	KEGG PATHWAY	hsa01230	1	75	0.293533	0.682957	PAH	http://www.genome.jp/kegg-bin/show_pathway?hsa01230/hsa:5053%09red
Drug metabolism - other enzymes	KEGG PATHWAY	hsa00983	1	79	0.306344	0.702462	GSTA3	http://www.genome.jp/kegg-bin/show_pathway?hsa00983/hsa:2940%09red
Endocytosis	KEGG PATHWAY	hsa04144	2	244	0.309	0.706213	FGFR3|PARD6B	http://www.genome.jp/kegg-bin/show_pathway?hsa04144/hsa:84612%09red/hsa:2261%09red
Peroxisome	KEGG PATHWAY	hsa04146	1	83	0.318925	0.719399	PEX5L	http://www.genome.jp/kegg-bin/show_pathway?hsa04146/hsa:51555%09red
Insulin secretion	KEGG PATHWAY	hsa04911	1	86	0.32821	0.731999	CREB3L1	http://www.genome.jp/kegg-bin/show_pathway?hsa04911/hsa:90993%09red
Metabolic pathways	KEGG PATHWAY	hsa01100	8	1433	0.336369	0.741832	DEGS2|PNLIPRP2|CYP21A2|CYP2B6|ENTPD8|PAH|GSTA3|COX6C	http://www.genome.jp/kegg-bin/show_pathway?hsa01100/hsa:2940%09red/hsa:123099%09red/hsa:1345%09red/hsa:5408%09red/hsa:1589%09red/hsa:377841%09red/hsa:5053%09red/hsa:1555%09red
Protein digestion and absorption	KEGG PATHWAY	hsa04974	1	90	0.340396	0.743609	CPB1	http://www.genome.jp/kegg-bin/show_pathway?hsa04974/hsa:1360%09red
Salivary secretion	KEGG PATHWAY	hsa04970	1	90	0.340396	0.743609	CST5	http://www.genome.jp/kegg-bin/show_pathway?hsa04970/hsa:1473%09red
Rheumatoid arthritis	KEGG PATHWAY	hsa05323	1	91	0.343407	0.746655	CLGN	http://www.genome.jp/kegg-bin/show_pathway?hsa05323/hsa:4312%09red
Prostate cancer	KEGG PATHWAY	hsa05215	1	97	0.361192	0.773186	CREB3L1	http://www.genome.jp/kegg-bin/show_pathway?hsa05215/hsa:90993%09red
Choline metabolism in cancer	KEGG PATHWAY	hsa05231	1	99	0.367013	0.776397	SLC44A4	http://www.genome.jp/kegg-bin/show_pathway?hsa05231/hsa:80736%09red
Viral protein interaction with cytokine and cytokine receptor	KEGG PATHWAY	hsa04061	1	100	0.369904	0.778597	IL20	http://www.genome.jp/kegg-bin/show_pathway?hsa04061/hsa:50604%09red
Melanogenesis	KEGG PATHWAY	hsa04916	1	101	0.372781	0.782276	CREB3L1	http://www.genome.jp/kegg-bin/show_pathway?hsa04916/hsa:90993%09red
Parathyroid hormone synthesis, secretion and action	KEGG PATHWAY	hsa04928	1	106	0.386974	0.798746	CREB3L1	http://www.genome.jp/kegg-bin/show_pathway?hsa04928/hsa:90993%09red
Glucagon signaling pathway	KEGG PATHWAY	hsa04922	1	106	0.386974	0.798746	CREB3L1	http://www.genome.jp/kegg-bin/show_pathway?hsa04922/hsa:90993%09red
Insulin resistance	KEGG PATHWAY	hsa04931	1	108	0.392561	0.806672	CREB3L1	http://www.genome.jp/kegg-bin/show_pathway?hsa04931/hsa:90993%09red
HIF-1 signaling pathway	KEGG PATHWAY	hsa04066	1	109	0.395335	0.809969	EIF4E1B	http://www.genome.jp/kegg-bin/show_pathway?hsa04066/hsa:253314%09red
TNF signaling pathway	KEGG PATHWAY	hsa04668	1	112	0.403583	0.818911	CREB3L1	http://www.genome.jp/kegg-bin/show_pathway?hsa04668/hsa:90993%09red
Leukocyte transendothelial migration	KEGG PATHWAY	hsa04670	1	112	0.403583	0.818911	CLDN25	http://www.genome.jp/kegg-bin/show_pathway?hsa04670/hsa:644672%09red
Sphingolipid signaling pathway	KEGG PATHWAY	hsa04071	1	119	0.422395	0.846623	DEGS2	http://www.genome.jp/kegg-bin/show_pathway?hsa04071/hsa:123099%09red
Thyroid hormone signaling pathway	KEGG PATHWAY	hsa04919	1	119	0.422395	0.846623	DIO1	http://www.genome.jp/kegg-bin/show_pathway?hsa04919/hsa:1733%09red
AMPK signaling pathway	KEGG PATHWAY	hsa04152	1	120	0.425033	0.849453	CREB3L1	http://www.genome.jp/kegg-bin/show_pathway?hsa04152/hsa:90993%09red
Human papillomavirus infection	KEGG PATHWAY	hsa05165	2	330	0.447562	0.885532	CREB3L1|PARD6B	http://www.genome.jp/kegg-bin/show_pathway?hsa05165/hsa:90993%09red/hsa:84612%09red
Purine metabolism	KEGG PATHWAY	hsa00230	1	130	0.450769	0.886461	ENTPD8	http://www.genome.jp/kegg-bin/show_pathway?hsa00230/hsa:377841%09red
Vascular smooth muscle contraction	KEGG PATHWAY	hsa04270	1	132	0.455776	0.887834	RAMP1	http://www.genome.jp/kegg-bin/show_pathway?hsa04270/hsa:10267%09red
Oxidative phosphorylation	KEGG PATHWAY	hsa00190	1	133	0.458263	0.891425	COX6C	http://www.genome.jp/kegg-bin/show_pathway?hsa00190/hsa:1345%09red
Insulin signaling pathway	KEGG PATHWAY	hsa04910	1	137	0.468097	0.902945	EIF4E1B	http://www.genome.jp/kegg-bin/show_pathway?hsa04910/hsa:253314%09red
Parkinson disease	KEGG PATHWAY	hsa05012	1	142	0.480141	0.923604	COX6C	http://www.genome.jp/kegg-bin/show_pathway?hsa05012/hsa:1345%09red
Cell adhesion molecules (CAMs)	KEGG PATHWAY	hsa04514	1	146	0.489579	0.935265	CLDN25	http://www.genome.jp/kegg-bin/show_pathway?hsa04514/hsa:644672%09red
Phospholipase D signaling pathway	KEGG PATHWAY	hsa04072	1	148	0.494234	0.940178	GRM4	http://www.genome.jp/kegg-bin/show_pathway?hsa04072/hsa:2914%09red
Non-alcoholic fatty liver disease (NAFLD)	KEGG PATHWAY	hsa04932	1	149	0.496546	0.942077	COX6C	http://www.genome.jp/kegg-bin/show_pathway?hsa04932/hsa:1345%09red
mTOR signaling pathway	KEGG PATHWAY	hsa04150	1	153	0.505688	0.954193	EIF4E1B	http://www.genome.jp/kegg-bin/show_pathway?hsa04150/hsa:253314%09red
Hepatitis C	KEGG PATHWAY	hsa05160	1	155	0.510197	0.960085	CLDN25	http://www.genome.jp/kegg-bin/show_pathway?hsa05160/hsa:644672%09red
Jak-STAT signaling pathway	KEGG PATHWAY	hsa04630	1	162	0.525657	0.979859	IL20	http://www.genome.jp/kegg-bin/show_pathway?hsa04630/hsa:50604%09red
Hepatitis B	KEGG PATHWAY	hsa05161	1	163	0.527826	0.982579	CREB3L1	http://www.genome.jp/kegg-bin/show_pathway?hsa05161/hsa:90993%09red
cGMP-PKG signaling pathway	KEGG PATHWAY	hsa04022	1	167	0.536402	0.991878	CREB3L1	http://www.genome.jp/kegg-bin/show_pathway?hsa04022/hsa:90993%09red
Hepatocellular carcinoma	KEGG PATHWAY	hsa05225	1	168	0.538522	0.993146	GSTA3	http://www.genome.jp/kegg-bin/show_pathway?hsa05225/hsa:2940%09red
Alzheimer disease	KEGG PATHWAY	hsa05010	1	171	0.544823	0.999443	COX6C	http://www.genome.jp/kegg-bin/show_pathway?hsa05010/hsa:1345%09red
NOD-like receptor signaling pathway	KEGG PATHWAY	hsa04621	1	178	0.559194	1	PYDC1	http://www.genome.jp/kegg-bin/show_pathway?hsa04621/hsa:260434%09red
Transcriptional misregulation in cancer	KEGG PATHWAY	hsa05202	1	186	0.575066	1	ARNT2	http://www.genome.jp/kegg-bin/show_pathway?hsa05202/hsa:9915%09red
Calcium signaling pathway	KEGG PATHWAY	hsa04020	1	193	0.588487	1	CACNA1H	http://www.genome.jp/kegg-bin/show_pathway?hsa04020/hsa:8912%09red
Epstein-Barr virus infection	KEGG PATHWAY	hsa05169	1	201	0.603308	1	ENTPD8	http://www.genome.jp/kegg-bin/show_pathway?hsa05169/hsa:377841%09red
Human T-cell leukemia virus 1 infection	KEGG PATHWAY	hsa05166	1	219	0.63474	1	CREB3L1	http://www.genome.jp/kegg-bin/show_pathway?hsa05166/hsa:90993%09red
MicroRNAs in cancer	KEGG PATHWAY	hsa05206	1	299	0.746998	1	FGFR3	http://www.genome.jp/kegg-bin/show_pathway?hsa05206/hsa:2261%09red
Olfactory transduction	KEGG PATHWAY	hsa04740	1	448	0.872506	1	GNG13	http://www.genome.jp/kegg-bin/show_pathway?hsa04740/hsa:51764%09red

## Sheet: P<0.05 KEGG
#Term	Database	ID	Input number	Background number	P-Value	Corrected P-Value	Input	Hyperlink
Neuroactive ligand-receptor interaction	KEGG PATHWAY	hsa04080	9	338	3.51945e-05	0.00965887	KISS1R|GHRH|PYY|GRIA2|PRLH|SSTR2|GRM4|HTR1E|TRH	http://www.genome.jp/kegg-bin/show_pathway?hsa04080/hsa:6752%09red/hsa:2691%09red/hsa:7200%09red/hsa:2891%09red/hsa:84634%09red/hsa:51052%09red/hsa:3354%09red/hsa:5697%09red/hsa:2914%09red
Dopaminergic synapse	KEGG PATHWAY	hsa04728	6	131	4.22532e-05	0.00965887	KCNJ3|CALY|GRIA2|GNG13|CREB3L1|GNG3	http://www.genome.jp/kegg-bin/show_pathway?hsa04728/hsa:51764%09red/hsa:2785%09red/hsa:2891%09red/hsa:3760%09red/hsa:90993%09red/hsa:50632%09red
Estrogen signaling pathway	KEGG PATHWAY	hsa04915	6	138	5.57913e-05	0.00965887	KCNJ3|KRT31|KRT35|TFF1|KRT37|CREB3L1	http://www.genome.jp/kegg-bin/show_pathway?hsa04915/hsa:3886%09red/hsa:3881%09red/hsa:3760%09red/hsa:90993%09red/hsa:8688%09red/hsa:7031%09red
Circadian entrainment	KEGG PATHWAY	hsa04713	5	97	0.00011	0.0156339	GRIA2|CACNA1H|GNG13|GNG3|KCNJ3	http://www.genome.jp/kegg-bin/show_pathway?hsa04713/hsa:8912%09red/hsa:51764%09red/hsa:2785%09red/hsa:2891%09red/hsa:3760%09red
Glutamatergic synapse	KEGG PATHWAY	hsa04724	5	114	0.000226518	0.0203851	GRIA2|KCNJ3|GRM4|GNG3|GNG13	http://www.genome.jp/kegg-bin/show_pathway?hsa04724/hsa:2914%09red/hsa:3760%09red/hsa:51764%09red/hsa:2785%09red/hsa:2891%09red
Serotonergic synapse	KEGG PATHWAY	hsa04726	5	115	0.000235496	0.0203851	KCNJ3|HTR1E|SLC6A4|GNG3|GNG13	http://www.genome.jp/kegg-bin/show_pathway?hsa04726/hsa:3760%09red/hsa:51764%09red/hsa:6532%09red/hsa:2785%09red/hsa:3354%09red
Metabolism of xenobiotics by cytochrome P450	KEGG PATHWAY	hsa00980	4	76	0.000508416	0.0335312	CYP2A13|AKR7A3|CYP2B6|GSTA3	http://www.genome.jp/kegg-bin/show_pathway?hsa00980/hsa:22977%09red/hsa:1555%09red/hsa:1553%09red/hsa:2940%09red
cAMP signaling pathway	KEGG PATHWAY	hsa04024	6	214	0.000552365	0.0347739	AMH|GRIA2|SSTR2|CREB3L1|TNNI3|HTR1E	http://www.genome.jp/kegg-bin/show_pathway?hsa04024/hsa:6752%09red/hsa:7137%09red/hsa:2891%09red/hsa:3354%09red/hsa:268%09red/hsa:90993%09red
Taste transduction	KEGG PATHWAY	hsa04742	4	83	0.000697941	0.0404173	GRM4|HTR1E|CALHM1|GNG13	http://www.genome.jp/kegg-bin/show_pathway?hsa04742/hsa:51764%09red/hsa:255022%09red/hsa:2914%09red/hsa:3354%09red
Cardiac muscle contraction	KEGG PATHWAY	hsa04260	4	86	0.000792695	0.0406623	CACNG1|CACNG4|TNNI3|COX6C	http://www.genome.jp/kegg-bin/show_pathway?hsa04260/hsa:786%09red/hsa:7137%09red/hsa:27092%09red/hsa:1345%09red
Tight junction	KEGG PATHWAY	hsa04530	5	170	0.0013031	0.0556383	TUBA3C|TUBA3E|TUBA3D|CLDN25|PARD6B	http://www.genome.jp/kegg-bin/show_pathway?hsa04530/hsa:84612%09red/hsa:112714%09red/hsa:113457%09red/hsa:7278%09red/hsa:644672%09red
Cholinergic synapse	KEGG PATHWAY	hsa04725	4	112	0.00202564	0.0738292	KCNJ3|CREB3L1|GNG3|GNG13	http://www.genome.jp/kegg-bin/show_pathway?hsa04725/hsa:3760%09red/hsa:90993%09red/hsa:51764%09red/hsa:2785%09red
Pathogenic Escherichia coli infection	KEGG PATHWAY	hsa05130	3	55	0.00240111	0.0773379	TUBA3C|TUBA3E|TUBA3D	http://www.genome.jp/kegg-bin/show_pathway?hsa05130/hsa:112714%09red/hsa:7278%09red/hsa:113457%09red
Relaxin signaling pathway	KEGG PATHWAY	hsa04926	4	130	0.00340872	0.0944215	CLGN|CREB3L1|GNG3|GNG13	http://www.genome.jp/kegg-bin/show_pathway?hsa04926/hsa:4312%09red/hsa:90993%09red/hsa:51764%09red/hsa:2785%09red
Cortisol synthesis and secretion	KEGG PATHWAY	hsa04927	3	65	0.0037717	0.100458	CACNA1H|CYP21A2|CREB3L1	http://www.genome.jp/kegg-bin/show_pathway?hsa04927/hsa:1589%09red/hsa:8912%09red/hsa:90993%09red
Retrograde endocannabinoid signaling	KEGG PATHWAY	hsa04723	4	148	0.00532514	0.120907	GRIA2|KCNJ3|GNG3|GNG13	http://www.genome.jp/kegg-bin/show_pathway?hsa04723/hsa:3760%09red/hsa:51764%09red/hsa:2785%09red/hsa:2891%09red
Adrenergic signaling in cardiomyocytes	KEGG PATHWAY	hsa04261	4	149	0.00544889	0.121721	CACNG1|CREB3L1|CACNG4|TNNI3	http://www.genome.jp/kegg-bin/show_pathway?hsa04261/hsa:786%09red/hsa:7137%09red/hsa:90993%09red/hsa:27092%09red
Gap junction	KEGG PATHWAY	hsa04540	3	88	0.00846904	0.158508	TUBA3C|TUBA3E|TUBA3D	http://www.genome.jp/kegg-bin/show_pathway?hsa04540/hsa:112714%09red/hsa:7278%09red/hsa:113457%09red
Hypertrophic cardiomyopathy (HCM)	KEGG PATHWAY	hsa05410	3	90	0.00898647	0.163767	CACNG1|CACNG4|TNNI3	http://www.genome.jp/kegg-bin/show_pathway?hsa05410/hsa:786%09red/hsa:7137%09red/hsa:27092%09red
Morphine addiction	KEGG PATHWAY	hsa05032	3	91	0.00925198	0.166416	KCNJ3|GNG3|GNG13	http://www.genome.jp/kegg-bin/show_pathway?hsa05032/hsa:3760%09red/hsa:51764%09red/hsa:2785%09red
Axon guidance	KEGG PATHWAY	hsa04360	4	181	0.0104817	0.183761	BMPR1B|ROBO2|PARD6B|UNC5A	http://www.genome.jp/kegg-bin/show_pathway?hsa04360/hsa:658%09red/hsa:6092%09red/hsa:84612%09red/hsa:90249%09red
Dilated cardiomyopathy (DCM)	KEGG PATHWAY	hsa05414	3	96	0.010648	0.184344	CACNG1|CACNG4|TNNI3	http://www.genome.jp/kegg-bin/show_pathway?hsa05414/hsa:786%09red/hsa:7137%09red/hsa:27092%09red
Aldosterone synthesis and secretion	KEGG PATHWAY	hsa04925	3	98	0.0112387	0.192168	CACNA1H|CYP21A2|CREB3L1	http://www.genome.jp/kegg-bin/show_pathway?hsa04925/hsa:1589%09red/hsa:8912%09red/hsa:90993%09red
Pathways in cancer	KEGG PATHWAY	hsa05200	7	530	0.0121534	0.201552	RET|GNG13|CLGN|GNG3|GSTA3|FGFR3|ARNT2	http://www.genome.jp/kegg-bin/show_pathway?hsa05200/hsa:2940%09red/hsa:51764%09red/hsa:4312%09red/hsa:2785%09red/hsa:9915%09red/hsa:2261%09red/hsa:5979%09red
Cytokine-cytokine receptor interaction	KEGG PATHWAY	hsa04060	5	294	0.0123696	0.201552	AMH|BMPR1B|GDF15|TNFRSF18|IL20	http://www.genome.jp/kegg-bin/show_pathway?hsa04060/hsa:658%09red/hsa:268%09red/hsa:9518%09red/hsa:50604%09red/hsa:8784%09red
MAPK signaling pathway	KEGG PATHWAY	hsa04010	5	295	0.0125339	0.201854	CACNA1H|CACNG1|CACNG4|FGFR3|MAPK8IP2	http://www.genome.jp/kegg-bin/show_pathway?hsa04010/hsa:786%09red/hsa:8912%09red/hsa:27092%09red/hsa:2261%09red/hsa:23542%09red
Bladder cancer	KEGG PATHWAY	hsa05219	2	41	0.0165309	0.241003	CLGN|FGFR3	http://www.genome.jp/kegg-bin/show_pathway?hsa05219/hsa:4312%09red/hsa:2261%09red
Fat digestion and absorption	KEGG PATHWAY	hsa04975	2	41	0.0165309	0.241003	PNLIPRP2|APOA1	http://www.genome.jp/kegg-bin/show_pathway?hsa04975/hsa:5408%09red/hsa:335%09red
Cocaine addiction	KEGG PATHWAY	hsa05030	2	49	0.0227928	0.277696	GRIA2|CREB3L1	http://www.genome.jp/kegg-bin/show_pathway?hsa05030/hsa:90993%09red/hsa:2891%09red
PI3K-Akt signaling pathway	KEGG PATHWAY	hsa04151	5	354	0.0250054	0.277696	CREB3L1|GNG13|GNG3|FGFR3|EIF4E1B	http://www.genome.jp/kegg-bin/show_pathway?hsa04151/hsa:90993%09red/hsa:51764%09red/hsa:253314%09red/hsa:2785%09red/hsa:2261%09red
Apoptosis	KEGG PATHWAY	hsa04210	3	136	0.0260592	0.277696	TUBA3C|TUBA3E|TUBA3D	http://www.genome.jp/kegg-bin/show_pathway?hsa04210/hsa:112714%09red/hsa:7278%09red/hsa:113457%09red
Phenylalanine, tyrosine and tryptophan biosynthesis	KEGG PATHWAY	hsa00400	1	5	0.0270431	0.277696	PAH	http://www.genome.jp/kegg-bin/show_pathway?hsa00400/hsa:5053%09red
Signaling pathways regulating pluripotency of stem cells	KEGG PATHWAY	hsa04550	3	140	0.0280215	0.277696	BMPR1B|HOXB1|FGFR3	http://www.genome.jp/kegg-bin/show_pathway?hsa04550/hsa:658%09red/hsa:3211%09red/hsa:2261%09red
Phagosome	KEGG PATHWAY	hsa04145	3	152	0.034366	0.282154	TUBA3C|TUBA3E|TUBA3D	http://www.genome.jp/kegg-bin/show_pathway?hsa04145/hsa:112714%09red/hsa:7278%09red/hsa:113457%09red
Oxytocin signaling pathway	KEGG PATHWAY	hsa04921	3	153	0.0349255	0.282154	KCNJ3|CACNG1|CACNG4	http://www.genome.jp/kegg-bin/show_pathway?hsa04921/hsa:786%09red/hsa:3760%09red/hsa:27092%09red
Hippo signaling pathway	KEGG PATHWAY	hsa04390	3	154	0.0354897	0.282154	AMH|BMPR1B|PARD6B	http://www.genome.jp/kegg-bin/show_pathway?hsa04390/hsa:658%09red/hsa:268%09red/hsa:84612%09red
Cushing syndrome	KEGG PATHWAY	hsa04934	3	155	0.0360586	0.282154	CACNA1H|CYP21A2|CREB3L1	http://www.genome.jp/kegg-bin/show_pathway?hsa04934/hsa:1589%09red/hsa:8912%09red/hsa:90993%09red
Amphetamine addiction	KEGG PATHWAY	hsa05031	2	68	0.0408152	0.289893	GRIA2|CREB3L1	http://www.genome.jp/kegg-bin/show_pathway?hsa05031/hsa:90993%09red/hsa:2891%09red
Central carbon metabolism in cancer	KEGG PATHWAY	hsa05230	2	69	0.0418748	0.292341	FGFR3|RET	http://www.genome.jp/kegg-bin/show_pathway?hsa05230/hsa:5979%09red/hsa:2261%09red
RNA transport	KEGG PATHWAY	hsa03013	3	165	0.0420042	0.292341	EEF1A2|NAT1|EIF4E1B	http://www.genome.jp/kegg-bin/show_pathway?hsa03013/hsa:1917%09red/hsa:1982%09red/hsa:253314%09red
Drug metabolism - cytochrome P450	KEGG PATHWAY	hsa00982	2	72	0.0451148	0.296133	CYP2B6|GSTA3	http://www.genome.jp/kegg-bin/show_pathway?hsa00982/hsa:2940%09red/hsa:1555%09red
PPAR signaling pathway	KEGG PATHWAY	hsa03320	2	76	0.0495733	0.304117	CLGN|APOA1	http://www.genome.jp/kegg-bin/show_pathway?hsa03320/hsa:4312%09red/hsa:335%09red
Arrhythmogenic right ventricular cardiomyopathy (ARVC)	KEGG PATHWAY	hsa05412	2	77	0.0507119	0.304117	CACNG1|CACNG4	http://www.genome.jp/kegg-bin/show_pathway?hsa05412/hsa:786%09red/hsa:27092%09red

## Sheet: KEGG pathway selected
Pathways	Count	pvalue	Gene
Neuroactive ligand-receptor interaction	9	3.51945e-05	KISS1R,GHRH,PYY,GRIA2,PRLH,SSTR2,GRM4,HTR1E,TRH
Estrogen signaling pathway	6	5.57913e-05	KCNJ3,KRT31,KRT35,TFF1,KRT37,CREB3L1
cAMP signaling pathway	6	0.000552365	AMH,GRIA2,SSTR2,CREB3L1,TNNI3,HTR1E
Tight junction	5	0.0013031	TUBA3C,TUBA3E,TUBA3D,CLDN25,PARD6B
Pathways in cancer	7	0.0121534	RET,GNG13,CLGN,GNG3,GSTA3,FGFR3,ARNT2
Cytokine-cytokine receptor interaction	5	0.0123696	AMH,BMPR1B,GDF15,TNFRSF18,IL20
MAPK signaling pathway	5	0.0125339	CACNA1H,CACNG1,CACNG4,FGFR3,MAPK8IP2
PI3K-Akt signaling pathway	5	0.0250054	CREB3L1,GNG13,GNG3,FGFR3,EIF4E1B
Apoptosis	3	0.0260592	TUBA3C,TUBA3E,TUBA3D
Signaling pathways regulating pluripotency of stem cells	3	0.0280215	BMPR1B,HOXB1,FGFR3

## Sheet: P<0.05 GO
#Term	Database	ID	Input number	Background number	P-Value	Corrected P-Value	Input	Hyperlink
somatodendritic compartment	Gene Ontology	GO:0036477	6	125	3.28702e-05	0.00965887	KCNH1|UNC5A|GNG13|BMPR1B|GNG3|MAPK8IP2	http://amigo.geneontology.org/amigo/term/GO:0036477
integral component of plasma membrane	Gene Ontology	GO:0005887	8	258	3.40301e-05	0.00965887	KCNJ3|CALHM1|KCNK16|SLC7A13|TPSG1|TSPAN1|GRM4|SHISA9	http://amigo.geneontology.org/amigo/term/GO:0005887
plasma membrane	Gene Ontology	GO:0005886	13	726	4.14048e-05	0.00965887	SLITRK6|SERPINA12|KCNK15|RAB26|F7|UNC5A|PARD6B|CLDN25|NEURL1|GNG3|CEACAM6|GP2|CLRN1	http://amigo.geneontology.org/amigo/term/GO:0005886
extracellular region	Gene Ontology	GO:0005576	13	736	4.74432e-05	0.00965887	PYY|SLC44A4|METRN|VSTM2A|MUC1|CPA6|TFF3|PGLYRP2|HPN|CEACAM6|PVALB|SPINK4|DNASE1L2	http://amigo.geneontology.org/amigo/term/GO:0005576
membrane	Gene Ontology	GO:0016020	19	1443	4.9443e-05	0.00965887	SPACA4|KCNJ3|KCNH1|GRIA2|KCNK15|CYP2B6|SPTSSB|CCDC78|GNG13|C16orf92|CYP2A7|DIO1|RIMS4|HTR1E|ZDHHC22|MISP|APOA1|GP2|GNG3	http://amigo.geneontology.org/amigo/term/GO:0016020
regulation of trans-synaptic signaling	Gene Ontology	GO:0099177	4	51	0.000119857	0.0156339	RIMS4|GRM4|SHISA9|SLC6A4	http://amigo.geneontology.org/amigo/term/GO:0099177
cell periphery	Gene Ontology	GO:0071944	13	812	0.000124168	0.0156339	SPACA4|SLC44A4|KCNE4|GRIA2|ROBO2|CFB|RET|ENTPD8|NEURL1|TPSG1|DIO1|CEACAM6|CLRN1	http://amigo.geneontology.org/amigo/term/GO:0071944
cellular anatomical entity	Gene Ontology	GO:0110165	28	2864	0.000156399	0.0175911	MTL5|GSTA3|TNNT1|AMH|CDH7|NEURL1|CEACAM5|CEACAM6|PVALB|NAT1|NKAIN1|CLRN1|KISS1R|METRN|TPRN|DNASE1L2|UNC5A|RAMP1|CLDN25|HPN|AKR7A3|CALY|SYT1|CFB|COX6C|CACNG1|MYT1|CACNG4	http://amigo.geneontology.org/amigo/term/GO:0110165
extracellular vesicle	Gene Ontology	GO:1903561	10	514	0.000166596	0.0175911	DHRS2|KRT35|KRT37|TFF3|PGLYRP2|GSTA3|AKR7A3|GPRC5A|GP2|CST5	http://amigo.geneontology.org/amigo/term/GO:1903561
intrinsic component of membrane	Gene Ontology	GO:0031224	13	843	0.000177816	0.0175911	CACNA1H|KISS1R|RAB26|SYT1|SPTSSB|ENTPD8|CREB3L1|KIAA1024L|SLC30A8|CACNG1|SLC22A24|SHISA9|HPN	http://amigo.geneontology.org/amigo/term/GO:0031224
cation transmembrane transporter activity	Gene Ontology	GO:0008324	5	120	0.00028451	0.0222375	CACNA1H|SLC44A4|COX6C|MAPK8IP2|SLC6A4	http://amigo.geneontology.org/amigo/term/GO:0008324
receptor regulator activity	Gene Ontology	GO:0030545	4	65	0.000289007	0.0222375	IL20|GDF15|APOA1|PRLH	http://amigo.geneontology.org/amigo/term/GO:0030545
binding	Gene Ontology	GO:0005488	23	2247	0.000329283	0.024003	GHRH|TRIM72|CFB|EEF1A2|TFF1|BPIFB1|TGM3|MYOG|CACNA1H|AMH|AMZ1|CIB3|MSMB|CEACAM6|MYT1|CALHM1|KCNK16|DNASE1L2|TSPAN1|RHPN1|SYT1|AGR2|CCDC151	http://amigo.geneontology.org/amigo/term/GO:0005488
steroid hydroxylase activity	Gene Ontology	GO:0008395	2	5	0.000428208	0.0296534	CYP2A7|CYP2B6	http://amigo.geneontology.org/amigo/term/GO:0008395
positive regulation of ERBB signaling pathway	Gene Ontology	GO:1901186	2	7	0.000729659	0.0404173	NEURL1|AGR2	http://amigo.geneontology.org/amigo/term/GO:1901186
cellular process	Gene Ontology	GO:0009987	26	2852	0.000758637	0.0404173	STARD10|GRIA2|EEF1A2|TFF1|HS6ST3|MAPK15|MYOG|PNLIPRP2|TUBA3E|CYP2B6|NEURL1|FAM135B|CST5|UNC5A|CCDC151|CYP2A7|KLHL1|NELL2|KIFC2|DUSP13|SYT9|LRFN2|RHBDL1|CSTL1|EIF4E1B|SPPL2C	http://amigo.geneontology.org/amigo/term/GO:0009987
inorganic cation transmembrane transport	Gene Ontology	GO:0098662	5	150	0.000758737	0.0404173	KCNK16|CACNG4|KCNK15|KCNH1|TNNI3	http://amigo.geneontology.org/amigo/term/GO:0098662
ceramide biosynthetic process	Gene Ontology	GO:0046513	2	9	0.00110806	0.0548095	FAM57B|DEGS2	http://amigo.geneontology.org/amigo/term/GO:0046513
serine hydrolase activity	Gene Ontology	GO:0017171	3	43	0.0012297	0.0556383	SERPINA9|SPINK4|HPN	http://amigo.geneontology.org/amigo/term/GO:0017171
regulation of stress fiber assembly	Gene Ontology	GO:0051492	2	10	0.00132568	0.0556383	KISS1R|APOA1	http://amigo.geneontology.org/amigo/term/GO:0051492
mating	Gene Ontology	GO:0007618	2	10	0.00132568	0.0556383	MAPK8IP2|SLC6A4	http://amigo.geneontology.org/amigo/term/GO:0007618
exocytic vesicle membrane	Gene Ontology	GO:0099501	2	10	0.00132568	0.0556383	SYT9|SYT1	http://amigo.geneontology.org/amigo/term/GO:0099501
channel activity	Gene Ontology	GO:0015267	4	102	0.00145604	0.0593122	GRIA2|CACNA1H|MAPK8IP2|KCNF1	http://amigo.geneontology.org/amigo/term/GO:0015267
receptor complex	Gene Ontology	GO:0043235	3	47	0.00156661	0.0619929	GRIA2|CACNG4|SHISA9	http://amigo.geneontology.org/amigo/term/GO:0043235
regulation of growth	Gene Ontology	GO:0040008	4	111	0.00196273	0.0738292	NELL2|SLC44A4|HPN|SLC6A4	http://amigo.geneontology.org/amigo/term/GO:0040008
extracellular space	Gene Ontology	GO:0005615	9	596	0.00199831	0.0738292	AMH|SLC44A4|DHRS2|RAMP1|KRT37|GSTA3|PAH|PVALB|LRG1	http://amigo.geneontology.org/amigo/term/GO:0005615
secretory granule	Gene Ontology	GO:0030141	3	53	0.00217156	0.0771181	SYT1|APOA1|SLC30A8	http://amigo.geneontology.org/amigo/term/GO:0030141
transmembrane receptor protein tyrosine kinase activity	Gene Ontology	GO:0004714	2	14	0.0023815	0.0773379	GPRC5A|RET	http://amigo.geneontology.org/amigo/term/GO:0004714
cochlea morphogenesis	Gene Ontology	GO:0090103	2	14	0.0023815	0.0773379	HPN|PAX2	http://amigo.geneontology.org/amigo/term/GO:0090103
tissue homeostasis	Gene Ontology	GO:0001894	3	55	0.00240111	0.0773379	PRLH|ZG16B|CLRN1	http://amigo.geneontology.org/amigo/term/GO:0001894
side of membrane	Gene Ontology	GO:0098552	3	57	0.00264513	0.0828211	SPPL2C|CEACAM5|GNG3	http://amigo.geneontology.org/amigo/term/GO:0098552
regulation of protein tyrosine kinase activity	Gene Ontology	GO:0061097	2	15	0.00269094	0.0828211	GPRC5A|DOK7	http://amigo.geneontology.org/amigo/term/GO:0061097
anion transmembrane transport	Gene Ontology	GO:0098656	3	59	0.00290392	0.0874333	SLC6A4|SLC22A24|SLC16A6	http://amigo.geneontology.org/amigo/term/GO:0098656
ciliary plasm	Gene Ontology	GO:0097014	2	16	0.00301823	0.0876863	SPEF1|CCDC151	http://amigo.geneontology.org/amigo/term/GO:0097014
response to peptide hormone	Gene Ontology	GO:0043434	3	60	0.00303895	0.0876863	CYP21A2|PRLH|GNG3	http://amigo.geneontology.org/amigo/term/GO:0043434
cis-regulatory region sequence-specific DNA binding	Gene Ontology	GO:0000987	3	62	0.00332042	0.0938527	MUC1|CREB3L1|PAX2	http://amigo.geneontology.org/amigo/term/GO:0000987
extrinsic component of cytoplasmic side of plasma membrane	Gene Ontology	GO:0031234	2	18	0.00372569	0.100458	SRMS|PTK6	http://amigo.geneontology.org/amigo/term/GO:0031234
neuron projection terminus	Gene Ontology	GO:0044306	2	19	0.00410553	0.10383	PVALB|GHRH	http://amigo.geneontology.org/amigo/term/GO:0044306
protein localization to cell periphery	Gene Ontology	GO:1990778	2	19	0.00410553	0.10383	RAMP1|RAB26	http://amigo.geneontology.org/amigo/term/GO:1990778
vesicle	Gene Ontology	GO:0031982	9	667	0.00414379	0.10383	SLC6A4|KRT31|F7|KRT37|RET|GDF15|ZG16B|FGFR3|BCAS1	http://amigo.geneontology.org/amigo/term/GO:0031982
cytoplasm	Gene Ontology	GO:0005737	16	1641	0.00419817	0.10383	TNNT1|CALY|RAB26|F7|GRIA2|PEX5L|NAT1|HSH2D|TFF3|SRMS|ARNT2|SPPL2C|EMX1|KIFC2|FGFR3|DUSP13	http://amigo.geneontology.org/amigo/term/GO:0005737
endopeptidase activity	Gene Ontology	GO:0004175	4	139	0.0042951	0.104363	CLGN|CST5|TMPRSS6|WFDC6	http://amigo.geneontology.org/amigo/term/GO:0004175
enzyme binding	Gene Ontology	GO:0019899	6	330	0.00464827	0.110998	FGD3|SLC6A4|NKAIN1|NELL2|FGFR3|MAPK8IP2	http://amigo.geneontology.org/amigo/term/GO:0019899
response to estradiol	Gene Ontology	GO:0032355	2	21	0.00491661	0.115415	MYOG|SLC6A4	http://amigo.geneontology.org/amigo/term/GO:0032355
peptidase activity, acting on L-amino acid peptides	Gene Ontology	GO:0070011	4	148	0.00532514	0.120907	CLGN|SPINK4|CPB1|CST5	http://amigo.geneontology.org/amigo/term/GO:0070011
peptide receptor activity	Gene Ontology	GO:0001653	2	23	0.00579514	0.1262	SSTR2|RAMP1	http://amigo.geneontology.org/amigo/term/GO:0001653
inorganic molecular entity transmembrane transporter activity	Gene Ontology	GO:0015318	4	152	0.00583162	0.1262	CACNA1H|CACNG1|KCNK16|SLC16A6	http://amigo.geneontology.org/amigo/term/GO:0015318
cell body	Gene Ontology	GO:0044297	3	77	0.00594089	0.126587	UNC5A|KCNH1|SEZ6L	http://amigo.geneontology.org/amigo/term/GO:0044297
negative regulation of protein metabolic process	Gene Ontology	GO:0051248	4	158	0.00664992	0.138937	SERPINA12|CSTL1|SPINK4|PTK6	http://amigo.geneontology.org/amigo/term/GO:0051248
hydrolase activity	Gene Ontology	GO:0016787	8	593	0.00672116	0.138937	PNLIPRP2|RHBDL1|CLGN|PAX2|SPPL2C|FGFR3|FAM135B|CST5	http://amigo.geneontology.org/amigo/term/GO:0016787
monooxygenase activity	Gene Ontology	GO:0004497	2	26	0.0072366	0.146162	PAH|CYP2B6	http://amigo.geneontology.org/amigo/term/GO:0004497
protein metabolic process	Gene Ontology	GO:0019538	11	1003	0.00733021	0.146162	F7|TMPRSS6|MUC1|PAX2|CFB|PYDC1|RHBDL1|HPN|EIF4E1B|EEF1A2|DOK7	http://amigo.geneontology.org/amigo/term/GO:0019538
ion transmembrane transporter activity	Gene Ontology	GO:0015075	4	163	0.00738724	0.146162	CACNA1H|TNNI3|MAPK8IP2|SLC22A24	http://amigo.geneontology.org/amigo/term/GO:0015075
intracellular vesicle	Gene Ontology	GO:0097708	5	261	0.0077362	0.15091	SYT1|SPPL2C|TRIM72|RAB26|FGFR3	http://amigo.geneontology.org/amigo/term/GO:0097708
cation transmembrane transport	Gene Ontology	GO:0098655	4	167	0.00801443	0.154166	KCNK16|MAPK8IP2|KCNF1|COX6C	http://amigo.geneontology.org/amigo/term/GO:0098655
endopeptidase inhibitor activity	Gene Ontology	GO:0004866	2	28	0.00827817	0.157058	SPINK4|WFDC6	http://amigo.geneontology.org/amigo/term/GO:0004866
proteolysis	Gene Ontology	GO:0006508	6	378	0.00871225	0.160886	SERPINA12|TRIM72|RET|TPSG1|CST9|ADAMTS19	http://amigo.geneontology.org/amigo/term/GO:0006508
GTPase binding	Gene Ontology	GO:0051020	3	92	0.00952204	0.169077	FGD3|FGFR3|RET	http://amigo.geneontology.org/amigo/term/GO:0051020
protein binding	Gene Ontology	GO:0005515	15	1688	0.012103	0.201552	TNNT1|AMH|FGD3|KRT31|SYT1|DHRS2|TFF1|RET|KCNJ3|PRLH|ZMYND10|CACNG1|NXPH1|FGFR3|NKAIN1	http://amigo.geneontology.org/amigo/term/GO:0005515
regulation of cellular metabolic process	Gene Ontology	GO:0031323	12	1229	0.0122565	0.201552	EEF1A2|HOXB1|EMX1|CREB3L1|MAPK8IP2|EIF4E1B|GRM4|DOK7|MYOG|APOA1|PAX2|GNG3	http://amigo.geneontology.org/amigo/term/GO:0031323
transmembrane transporter activity	Gene Ontology	GO:0022857	4	193	0.0129493	0.204208	GRIA2|SLC44A4|CACNG4|SLC6A4	http://amigo.geneontology.org/amigo/term/GO:0022857
peptidase regulator activity	Gene Ontology	GO:0061134	2	36	0.0130626	0.204208	CST9|WFDC6	http://amigo.geneontology.org/amigo/term/GO:0061134
trans-synaptic signaling	Gene Ontology	GO:0099537	3	104	0.0131224	0.204208	GRM4|HTR1E|SYT13	http://amigo.geneontology.org/amigo/term/GO:0099537
molecular function regulator	Gene Ontology	GO:0098772	5	307	0.0146211	0.225003	SERPINA9|CSTL1|GDF15|MAPK8IP2|CST5	http://amigo.geneontology.org/amigo/term/GO:0098772
identical protein binding	Gene Ontology	GO:0042802	4	202	0.0150241	0.227336	SYT9|CEACAM5|CALHM1|SYT1	http://amigo.geneontology.org/amigo/term/GO:0042802
extrinsic component of membrane	Gene Ontology	GO:0019898	2	39	0.015101	0.227336	TGM3|GNG13	http://amigo.geneontology.org/amigo/term/GO:0019898
voltage-gated channel activity	Gene Ontology	GO:0022832	2	40	0.015809	0.235434	KCNK16|CALHM1	http://amigo.geneontology.org/amigo/term/GO:0022832
serine-type endopeptidase activity	Gene Ontology	GO:0004252	2	42	0.0172666	0.246539	CFB|WFDC6	http://amigo.geneontology.org/amigo/term/GO:0004252
positive regulation of lipase activity	Gene Ontology	GO:0060193	2	42	0.0172666	0.246539	APOA1|FGFR3	http://amigo.geneontology.org/amigo/term/GO:0060193
extracellular exosome	Gene Ontology	GO:0070062	6	445	0.0179503	0.252043	TGM3|BPIFB1|TSPAN1|CYSRT1|GP2|BCAS1	http://amigo.geneontology.org/amigo/term/GO:0070062
molecular adaptor activity	Gene Ontology	GO:0060090	2	43	0.0180161	0.252043	HSH2D|MAPK8IP2	http://amigo.geneontology.org/amigo/term/GO:0060090
regulation of secretion by cell	Gene Ontology	GO:1903530	3	120	0.0189778	0.262843	RIMS4|SLC30A8|PYDC1	http://amigo.geneontology.org/amigo/term/GO:1903530
G protein-coupled receptor binding	Gene Ontology	GO:0001664	2	46	0.0203453	0.276257	PRLH|RAMP1	http://amigo.geneontology.org/amigo/term/GO:0001664
apical plasma membrane	Gene Ontology	GO:0016324	2	46	0.0203453	0.276257	MUC1|HPN	http://amigo.geneontology.org/amigo/term/GO:0016324
positive regulation of neuron projection development	Gene Ontology	GO:0010976	2	48	0.021964	0.277696	CRABP2|METRN	http://amigo.geneontology.org/amigo/term/GO:0010976
serine-type peptidase activity	Gene Ontology	GO:0008236	2	51	0.0244885	0.277696	TMPRSS6|WFDC6	http://amigo.geneontology.org/amigo/term/GO:0008236
presynapse	Gene Ontology	GO:0098793	2	51	0.0244885	0.277696	RIMS4|SYT9	http://amigo.geneontology.org/amigo/term/GO:0098793
transport vesicle	Gene Ontology	GO:0030133	2	51	0.0244885	0.277696	CGA|RAB26	http://amigo.geneontology.org/amigo/term/GO:0030133
glycerophospholipid biosynthetic process	Gene Ontology	GO:0046474	2	53	0.0262341	0.277696	SLC44A4|FGFR3	http://amigo.geneontology.org/amigo/term/GO:0046474
regulation of cellular amide metabolic process	Gene Ontology	GO:0034248	2	53	0.0262341	0.277696	NAT1|EIF4E1B	http://amigo.geneontology.org/amigo/term/GO:0034248
catalytic activity, acting on a protein	Gene Ontology	GO:0140096	6	488	0.026541	0.277696	F7|SERPINA9|MAPK15|DUSP13|MAPK8IP2|WFDC6	http://amigo.geneontology.org/amigo/term/GO:0140096
ammonium transmembrane transport	Gene Ontology	GO:0072488	1	5	0.0270431	0.277696	SLC6A4	http://amigo.geneontology.org/amigo/term/GO:0072488
centriolar satellite	Gene Ontology	GO:0034451	1	5	0.0270431	0.277696	ZMYND10	http://amigo.geneontology.org/amigo/term/GO:0034451
syntaxin-1 binding	Gene Ontology	GO:0017075	1	5	0.0270431	0.277696	SYT1	http://amigo.geneontology.org/amigo/term/GO:0017075
isoprenoid binding	Gene Ontology	GO:0019840	1	5	0.0270431	0.277696	LCN12	http://amigo.geneontology.org/amigo/term/GO:0019840
oxidoreductase activity, acting on paired donors, with incorporation or reduction of molecular oxygen, reduced flavin or flavoprotein as one donor, and incorporation of one atom of oxygen	Gene Ontology	GO:0016712	1	5	0.0270431	0.277696	CYP2B6	http://amigo.geneontology.org/amigo/term/GO:0016712
aldosterone metabolic process	Gene Ontology	GO:0032341	1	5	0.0270431	0.277696	CACNA1H	http://amigo.geneontology.org/amigo/term/GO:0032341
heparan sulfate sulfotransferase activity	Gene Ontology	GO:0034483	1	5	0.0270431	0.277696	HS6ST3	http://amigo.geneontology.org/amigo/term/GO:0034483
cell proliferation in external granule layer	Gene Ontology	GO:0021924	1	5	0.0270431	0.277696	SLC6A4	http://amigo.geneontology.org/amigo/term/GO:0021924
S-acyltransferase activity	Gene Ontology	GO:0016417	1	5	0.0270431	0.277696	ZDHHC22	http://amigo.geneontology.org/amigo/term/GO:0016417
secondary alcohol biosynthetic process	Gene Ontology	GO:1902653	1	5	0.0270431	0.277696	APOA1	http://amigo.geneontology.org/amigo/term/GO:1902653
negative regulation of cytokine secretion involved in immune response	Gene Ontology	GO:0002740	1	5	0.0270431	0.277696	APOA1	http://amigo.geneontology.org/amigo/term/GO:0002740
regulation of histone H4 acetylation	Gene Ontology	GO:0090239	1	5	0.0270431	0.277696	MUC1	http://amigo.geneontology.org/amigo/term/GO:0090239
chondrocyte development	Gene Ontology	GO:0002063	1	5	0.0270431	0.277696	BMPR1B	http://amigo.geneontology.org/amigo/term/GO:0002063
regulation of protein kinase C signaling	Gene Ontology	GO:0090036	1	5	0.0270431	0.277696	SEZ6L	http://amigo.geneontology.org/amigo/term/GO:0090036
enzyme inhibitor activity	Gene Ontology	GO:0004857	2	54	0.0271253	0.277696	CST9L|APOA1	http://amigo.geneontology.org/amigo/term/GO:0004857
response to insulin	Gene Ontology	GO:0032868	2	54	0.0271253	0.277696	SERPINA12|PRLH	http://amigo.geneontology.org/amigo/term/GO:0032868
supramolecular fiber organization	Gene Ontology	GO:0097435	3	139	0.0275237	0.277696	KISS1R|PYDC1|CLRN1	http://amigo.geneontology.org/amigo/term/GO:0097435
DNA-binding transcription factor binding	Gene Ontology	GO:0140297	2	56	0.0289439	0.277696	FOXH1|ARNT2	http://amigo.geneontology.org/amigo/term/GO:0140297
cellular response to tumor necrosis factor	Gene Ontology	GO:0071356	2	56	0.0289439	0.277696	APOA1|TNFRSF18	http://amigo.geneontology.org/amigo/term/GO:0071356
intracellular	Gene Ontology	GO:0005622	17	2228	0.0293324	0.277696	SPACA4|MALRD1|FGD3|CRABP2|PGLYRP2|PEX5L|EEF1A2|HOXB1|KRT35|TMPRSS6|MAPK15|TSPAN1|GRM4|ZDHHC22|MYT1|CAPN9|MISP	http://amigo.geneontology.org/amigo/term/GO:0005622
organonitrogen compound metabolic process	Gene Ontology	GO:1901564	15	1894	0.029855	0.277696	SERPINA12|DEGS2|KCNH1|MUC1|BMPR1B|CPB1|CLGN|SRMS|DIO1|HS6ST3|GRM4|ZDHHC22|SPINK4|EEF1A2|DUSP13	http://amigo.geneontology.org/amigo/term/GO:1901564
ear development	Gene Ontology	GO:0043583	2	58	0.0308098	0.277696	SLITRK6|HPN	http://amigo.geneontology.org/amigo/term/GO:0043583
positive regulation of telomere maintenance via telomere lengthening	Gene Ontology	GO:1904358	1	6	0.0314789	0.277696	MAPK15	http://amigo.geneontology.org/amigo/term/GO:1904358
AMPA glutamate receptor complex	Gene Ontology	GO:0032281	1	6	0.0314789	0.277696	GRIA2	http://amigo.geneontology.org/amigo/term/GO:0032281
phospholipid transporter activity	Gene Ontology	GO:0005548	1	6	0.0314789	0.277696	APOA1	http://amigo.geneontology.org/amigo/term/GO:0005548
positive regulation of axonogenesis	Gene Ontology	GO:0050772	1	6	0.0314789	0.277696	CRABP2	http://amigo.geneontology.org/amigo/term/GO:0050772
cellular response to estradiol stimulus	Gene Ontology	GO:0071392	1	6	0.0314789	0.277696	MYOG	http://amigo.geneontology.org/amigo/term/GO:0071392
negative regulation of response to endoplasmic reticulum stress	Gene Ontology	GO:1903573	1	6	0.0314789	0.277696	CREB3L1	http://amigo.geneontology.org/amigo/term/GO:1903573
regulation of intrinsic apoptotic signaling pathway in response to DNA damage by p53 class mediator	Gene Ontology	GO:1902165	1	6	0.0314789	0.277696	MUC1	http://amigo.geneontology.org/amigo/term/GO:1902165
renal vesicle morphogenesis	Gene Ontology	GO:0072077	1	6	0.0314789	0.277696	PAX2	http://amigo.geneontology.org/amigo/term/GO:0072077
ureter development	Gene Ontology	GO:0072189	1	6	0.0314789	0.277696	RET	http://amigo.geneontology.org/amigo/term/GO:0072189
cell aggregation	Gene Ontology	GO:0098743	1	6	0.0314789	0.277696	OTOR	http://amigo.geneontology.org/amigo/term/GO:0098743
presynaptic active zone	Gene Ontology	GO:0048786	1	6	0.0314789	0.277696	RIMS4	http://amigo.geneontology.org/amigo/term/GO:0048786
organelle localization by membrane tethering	Gene Ontology	GO:0140056	1	6	0.0314789	0.277696	SYT1	http://amigo.geneontology.org/amigo/term/GO:0140056
excitatory extracellular ligand-gated ion channel activity	Gene Ontology	GO:0005231	1	6	0.0314789	0.277696	GRIA2	http://amigo.geneontology.org/amigo/term/GO:0005231
nucleotide transport	Gene Ontology	GO:0006862	1	6	0.0314789	0.277696	CALHM1	http://amigo.geneontology.org/amigo/term/GO:0006862
negative regulation of catecholamine secretion	Gene Ontology	GO:0033604	1	6	0.0314789	0.277696	CGA	http://amigo.geneontology.org/amigo/term/GO:0033604
response to thyroid hormone	Gene Ontology	GO:0097066	1	6	0.0314789	0.277696	HPN	http://amigo.geneontology.org/amigo/term/GO:0097066
response to potassium ion	Gene Ontology	GO:0035864	1	6	0.0314789	0.277696	CACNA1H	http://amigo.geneontology.org/amigo/term/GO:0035864
lung epithelial cell differentiation	Gene Ontology	GO:0060487	1	6	0.0314789	0.277696	AGR2	http://amigo.geneontology.org/amigo/term/GO:0060487
triglyceride lipase activity	Gene Ontology	GO:0004806	1	6	0.0314789	0.277696	APOA1	http://amigo.geneontology.org/amigo/term/GO:0004806
regulation of gamma-aminobutyric acid secretion	Gene Ontology	GO:0014052	1	6	0.0314789	0.277696	TRH	http://amigo.geneontology.org/amigo/term/GO:0014052
T-tubule	Gene Ontology	GO:0030315	1	6	0.0314789	0.277696	KCNJ3	http://amigo.geneontology.org/amigo/term/GO:0030315
gated channel activity	Gene Ontology	GO:0022836	2	59	0.0317602	0.278404	GRIA2|CALHM1	http://amigo.geneontology.org/amigo/term/GO:0022836
organelle	Gene Ontology	GO:0043226	16	2086	0.0325742	0.282154	CALY|F7|KRT31|DHRS2|DNASE1L2|KRT35|TFF3|TSPAN1|GDF15|PVALB|LRG1|EMX1|MYOG|SEZ6L|ZG16B|CST5	http://amigo.geneontology.org/amigo/term/GO:0043226
mesonephric epithelium development	Gene Ontology	GO:0072163	2	61	0.0336953	0.282154	ROBO2|PAX2	http://amigo.geneontology.org/amigo/term/GO:0072163
cellular component organization or biogenesis	Gene Ontology	GO:0071840	13	1594	0.0340953	0.282154	SYT13|CRABP2|MAPK15|KRT31|SYT1|PTK6|EMX1|NEURL1|CREB3L1|LRFN2|HPN|PAX2|CDH7	http://amigo.geneontology.org/amigo/term/GO:0071840
developmental growth	Gene Ontology	GO:0048589	3	154	0.0354897	0.282154	SLITRK6|BMPR1B|EMX1	http://amigo.geneontology.org/amigo/term/GO:0048589
negative regulation of protein phosphorylation	Gene Ontology	GO:0001933	2	63	0.0356753	0.282154	GPRC5A|PTK6	http://amigo.geneontology.org/amigo/term/GO:0001933
negative chemotaxis	Gene Ontology	GO:0050919	1	7	0.0358946	0.282154	ROBO2	http://amigo.geneontology.org/amigo/term/GO:0050919
regulation of endoplasmic reticulum stress-induced intrinsic apoptotic signaling pathway	Gene Ontology	GO:1902235	1	7	0.0358946	0.282154	CREB3L1	http://amigo.geneontology.org/amigo/term/GO:1902235
cartilage condensation	Gene Ontology	GO:0001502	1	7	0.0358946	0.282154	BMPR1B	http://amigo.geneontology.org/amigo/term/GO:0001502
brain morphogenesis	Gene Ontology	GO:0048854	1	7	0.0358946	0.282154	EMX1	http://amigo.geneontology.org/amigo/term/GO:0048854
negative regulation of toll-like receptor 4 signaling pathway	Gene Ontology	GO:0034144	1	7	0.0358946	0.282154	BPIFB1	http://amigo.geneontology.org/amigo/term/GO:0034144
retinal ganglion cell axon guidance	Gene Ontology	GO:0031290	1	7	0.0358946	0.282154	BMPR1B	http://amigo.geneontology.org/amigo/term/GO:0031290
cellular response to lithium ion	Gene Ontology	GO:0071285	1	7	0.0358946	0.282154	MYOG	http://amigo.geneontology.org/amigo/term/GO:0071285
steroid hormone biosynthetic process	Gene Ontology	GO:0120178	1	7	0.0358946	0.282154	CACNA1H	http://amigo.geneontology.org/amigo/term/GO:0120178
regulation of intracellular steroid hormone receptor signaling pathway	Gene Ontology	GO:0033143	1	7	0.0358946	0.282154	FOXH1	http://amigo.geneontology.org/amigo/term/GO:0033143
apoptotic process involved in development	Gene Ontology	GO:1902742	1	7	0.0358946	0.282154	PAX2	http://amigo.geneontology.org/amigo/term/GO:1902742
active transmembrane transporter activity	Gene Ontology	GO:0022804	2	64	0.0366818	0.285417	SLC7A13|SLC16A6	http://amigo.geneontology.org/amigo/term/GO:0022804
GTPase activity	Gene Ontology	GO:0003924	3	158	0.0377935	0.287639	FGD3|FGFR3|RET	http://amigo.geneontology.org/amigo/term/GO:0003924
olfactory bulb interneuron differentiation	Gene Ontology	GO:0021889	1	8	0.0402902	0.287639	ROBO2	http://amigo.geneontology.org/amigo/term/GO:0021889
amyloid-beta binding	Gene Ontology	GO:0001540	1	8	0.0402902	0.287639	APOA1	http://amigo.geneontology.org/amigo/term/GO:0001540
kinesin binding	Gene Ontology	GO:0019894	1	8	0.0402902	0.287639	MAPK8IP2	http://amigo.geneontology.org/amigo/term/GO:0019894
O-acyltransferase activity	Gene Ontology	GO:0008374	1	8	0.0402902	0.287639	APOA1	http://amigo.geneontology.org/amigo/term/GO:0008374
delayed rectifier potassium channel activity	Gene Ontology	GO:0005251	1	8	0.0402902	0.287639	KCNH1	http://amigo.geneontology.org/amigo/term/GO:0005251
transition metal ion transmembrane transporter activity	Gene Ontology	GO:0046915	1	8	0.0402902	0.287639	SLC30A8	http://amigo.geneontology.org/amigo/term/GO:0046915
palmitoyltransferase activity	Gene Ontology	GO:0016409	1	8	0.0402902	0.287639	ZDHHC22	http://amigo.geneontology.org/amigo/term/GO:0016409
positive regulation of telomere maintenance	Gene Ontology	GO:0032206	1	8	0.0402902	0.287639	MAPK15	http://amigo.geneontology.org/amigo/term/GO:0032206
regulation of extrinsic apoptotic signaling pathway in absence of ligand	Gene Ontology	GO:2001239	1	8	0.0402902	0.287639	RET	http://amigo.geneontology.org/amigo/term/GO:2001239
heterotrimeric G-protein complex	Gene Ontology	GO:0005834	1	8	0.0402902	0.287639	GNG3	http://amigo.geneontology.org/amigo/term/GO:0005834
neuropeptide receptor activity	Gene Ontology	GO:0008188	1	8	0.0402902	0.287639	GPR139	http://amigo.geneontology.org/amigo/term/GO:0008188
vestibulocochlear nerve development	Gene Ontology	GO:0021562	1	8	0.0402902	0.287639	PAX2	http://amigo.geneontology.org/amigo/term/GO:0021562
calcium-dependent phospholipid binding	Gene Ontology	GO:0005544	1	8	0.0402902	0.287639	SYT1	http://amigo.geneontology.org/amigo/term/GO:0005544
microtubule motor activity	Gene Ontology	GO:0003777	1	8	0.0402902	0.287639	KIFC2	http://amigo.geneontology.org/amigo/term/GO:0003777
regulation of metanephric nephron tubule epithelial cell differentiation	Gene Ontology	GO:0072307	1	8	0.0402902	0.287639	PAX2	http://amigo.geneontology.org/amigo/term/GO:0072307
G protein-coupled receptor signaling pathway, coupled to cyclic nucleotide second messenger	Gene Ontology	GO:0007187	3	164	0.0413888	0.292341	GRM4|HTR1E|SSTR2	http://amigo.geneontology.org/amigo/term/GO:0007187
dendritic tree	Gene Ontology	GO:0097447	2	69	0.0418748	0.292341	GNG13|KLHL1	http://amigo.geneontology.org/amigo/term/GO:0097447
response to peptide	Gene Ontology	GO:1901652	2	70	0.0429447	0.294582	PRLH|TFF1	http://amigo.geneontology.org/amigo/term/GO:1901652
catalytic activity	Gene Ontology	GO:0003824	10	1162	0.043861	0.294582	SERPINA12|PNLIPRP2|CYP21A2|DHRS2|ENTPD8|PGLYRP2|CST9|GRM4|GPRC5A|ADAMTS19	http://amigo.geneontology.org/amigo/term/GO:0003824
cation channel activity	Gene Ontology	GO:0005261	2	71	0.0440247	0.294582	GRIA2|KCNK15	http://amigo.geneontology.org/amigo/term/GO:0005261
rhythmic behavior	Gene Ontology	GO:0007622	1	9	0.0446659	0.294582	GHRH	http://amigo.geneontology.org/amigo/term/GO:0007622
lumenal side of membrane	Gene Ontology	GO:0098576	1	9	0.0446659	0.294582	SPPL2C	http://amigo.geneontology.org/amigo/term/GO:0098576
negative regulation of organic acid transport	Gene Ontology	GO:0032891	1	9	0.0446659	0.294582	TRH	http://amigo.geneontology.org/amigo/term/GO:0032891
negative regulation of intrinsic apoptotic signaling pathway in response to DNA damage by p53 class mediator	Gene Ontology	GO:1902166	1	9	0.0446659	0.294582	MUC1	http://amigo.geneontology.org/amigo/term/GO:1902166
specification of animal organ identity	Gene Ontology	GO:0010092	1	9	0.0446659	0.294582	FOXH1	http://amigo.geneontology.org/amigo/term/GO:0010092
sterol binding	Gene Ontology	GO:0032934	1	9	0.0446659	0.294582	APOA1	http://amigo.geneontology.org/amigo/term/GO:0032934
regulation of carbohydrate biosynthetic process	Gene Ontology	GO:0043255	1	9	0.0446659	0.294582	SERPINA12	http://amigo.geneontology.org/amigo/term/GO:0043255
ionotropic glutamate receptor activity	Gene Ontology	GO:0004970	1	9	0.0446659	0.294582	MAPK8IP2	http://amigo.geneontology.org/amigo/term/GO:0004970
dendrite	Gene Ontology	GO:0030425	2	73	0.0462148	0.301922	GNG3|KLHL1	http://amigo.geneontology.org/amigo/term/GO:0030425
syncytium formation	Gene Ontology	GO:0006949	4	292	0.0473198	0.304117	CACNA1H|MYOG|GDF15|KCNH1	http://amigo.geneontology.org/amigo/term/GO:0006949
ribonucleotide binding	Gene Ontology	GO:0032553	4	292	0.0473198	0.304117	BMPR1B|KIFC2|FGFR3|RET	http://amigo.geneontology.org/amigo/term/GO:0032553
ionotropic glutamate receptor complex	Gene Ontology	GO:0008328	1	10	0.0490216	0.304117	SHISA9	http://amigo.geneontology.org/amigo/term/GO:0008328
regulation of viral transcription	Gene Ontology	GO:0046782	1	10	0.0490216	0.304117	HPN	http://amigo.geneontology.org/amigo/term/GO:0046782
regulation of filopodium assembly	Gene Ontology	GO:0051489	1	10	0.0490216	0.304117	NEURL1	http://amigo.geneontology.org/amigo/term/GO:0051489
positive regulation of striated muscle contraction	Gene Ontology	GO:0045989	1	10	0.0490216	0.304117	CGA	http://amigo.geneontology.org/amigo/term/GO:0045989
negative regulation of interleukin-1 secretion	Gene Ontology	GO:0050711	1	10	0.0490216	0.304117	APOA1	http://amigo.geneontology.org/amigo/term/GO:0050711
response to magnetism	Gene Ontology	GO:0071000	1	10	0.0490216	0.304117	MYOG	http://amigo.geneontology.org/amigo/term/GO:0071000
epidermis morphogenesis	Gene Ontology	GO:0048730	1	10	0.0490216	0.304117	TGM3	http://amigo.geneontology.org/amigo/term/GO:0048730
cerebellar Purkinje cell layer development	Gene Ontology	GO:0021680	1	10	0.0490216	0.304117	KLHL1	http://amigo.geneontology.org/amigo/term/GO:0021680
regulation of tumor necrosis factor-mediated signaling pathway	Gene Ontology	GO:0010803	1	10	0.0490216	0.304117	APOA1	http://amigo.geneontology.org/amigo/term/GO:0010803
membrane-bounded organelle	Gene Ontology	GO:0043227	15	2030	0.0491917	0.304117	SLC44A4|CRABP2|CYP2A13|SYT1|MUC1|DHRS2|PARD6B|RET|PGLYRP2|CCDC78|PAH|MYOG|APOA1|EEF1A2|ZG16B	http://amigo.geneontology.org/amigo/term/GO:0043227
cell junction	Gene Ontology	GO:0030054	3	177	0.049745	0.304117	RIMS4|NEURL1|SHISA9	http://amigo.geneontology.org/amigo/term/GO:0030054
regulation of protein metabolic process	Gene Ontology	GO:0051246	6	571	0.0499749	0.304117	CST9L|PYDC1|HPN|EIF4E1B|FGFR3|GNG3	http://amigo.geneontology.org/amigo/term/GO:0051246

## Sheet: GO term selected
Supplementary Table 6. KEGG pathway and GO enrichment analysis of differential genes in the co-expression Brown module.
Pathways	Count	pvalue	Gene
integral component of plasma membrane	8	3.40301e-05	KCNJ3,CALHM1,KCNK16,SLC7A13,TPSG1,TSPAN1,GRM4,SHISA9
extracellular region	13	4.74432e-05	PYY,SLC44A4,METRN,VSTM2A,MUC1,CPA6,TFF3,PGLYRP2,HPN,CEACAM6,PVALB,SPINK4,DNASE1L2
extracellular vesicle	10	0.000166596	DHRS2,KRT35,KRT37,TFF3,PGLYRP2,GSTA3,AKR7A3,GPRC5A,GP2,CST5
intrinsic component of membrane	13	0.000177816	CACNA1H,KISS1R,RAB26,SYT1,SPTSSB,ENTPD8,CREB3L1,KIAA1024L,SLC30A8,CACNG1,SLC22A24,SHISA9,HPN
receptor regulator activity	4	0.000289007	IL20,GDF15,APOA1,PRLH
binding	23	0.000329283	GHRH,TRIM72,CFB,EEF1A2,TFF1,BPIFB1,TGM3,MYOG,CACNA1H,AMH,AMZ1,CIB3,MSMB,CEACAM6,MYT1,CALHM1,KCNK16,DNASE1L2,TSPAN1,RHPN1,SYT1,AGR2,CCDC151
regulation of growth	4	0.00196273	NELL2,SLC44A4,HPN,SLC6A4
enzyme binding	6	0.00464827	FGD3,SLC6A4,NKAIN1,NELL2,FGFR3,MAPK8IP2
response to estradiol	2	0.00491661	MYOG,SLC6A4
GTPase binding	3	0.00952204	FGD3,FGFR3,RET
