# Supplementary material for: Identification of key modules and genes associated with breast cancer prognosis using WGCNA and ceRNA network analysis
Source: Aging (Albany NY). 2020 Dec 9;13(2):2519–38. doi: 10.18632/aging.202285 (PMC7880379; doi:10.18632/aging.202285)
Supplement: Supplementary Table 7 [file aging-13-202285-s008.xlsx]

## Sheet: lncRNA-miRNA-mRNA network edges
Supplementary Table 7. Genes in LncRNA-miRNA-mRNA ceRNA and lncRNA-RBP-mRNA networks.
Gene	attribute
PARD6B	hsa-miR-200b-3p
PARD6B	hsa-miR-429
PARD6B	hsa-miR-320b
ROBO2	hsa-miR-92b-3p
FBXL16	hsa-miR-9-5p
PEX5L	hsa-miR-130a-3p
FBXL16	hsa-miR-139-5p
SYT9	hsa-miR-34c-5p
PARD6B	hsa-let-7a-5p
FGFR3	hsa-miR-100-5p
PARD6B	hsa-miR-200c-3p
PARD6B	hsa-miR-196a-5p
SYT9	hsa-miR-196a-5p
SLC16A6	hsa-miR-26a-5p
PARD6B	hsa-let-7i-5p
PARD6B	hsa-miR-320d
PARD6B	hsa-miR-17-5p
PRR15	hsa-miR-17-5p
PARD6B	hsa-miR-20a-5p
PRR15	hsa-miR-20a-5p
ROBO2	hsa-miR-92a-3p
PARD6B	hsa-miR-381-3p
FBXL16	hsa-miR-154-5p
SLC16A6	hsa-miR-193b-3p
BMPR1B	hsa-miR-144-3p
SLC16A6	hsa-miR-193a-3p
PARD6B	hsa-miR-142-3p
PEX5L	hsa-miR-454-3p
PEX5L	hsa-miR-301a-3p
PARD6B	hsa-miR-320c
PARD6B	hsa-miR-27a-3p
SYT1	hsa-miR-27a-3p
PARD6B	hsa-miR-23a-3p
FGFR3	hsa-miR-99b-5p
PARD6B	hsa-let-7e-5p
PARD6B	hsa-miR-519d-3p
SLC16A6	hsa-miR-26b-5p
FGFR3	hsa-miR-99a-5p
PARD6B	hsa-let-7c-5p
PEX5L	hsa-miR-301b
PEX5L	hsa-miR-130b-3p
PARD6B	hsa-let-7b-5p
SYT1	hsa-miR-449a
SYT1	hsa-miR-449b-5p
PARD6B	hsa-miR-196b-5p
SYT9	hsa-miR-196b-5p
ROBO2	hsa-miR-25-3p
PARD6B	hsa-miR-93-5p
PRR15	hsa-miR-93-5p
PARD6B	hsa-miR-106b-5p
PEX5L	hsa-miR-106b-5p
PRR15	hsa-miR-106b-5p
PARD6B	hsa-miR-320a
COX6C	hsa-miR-873-5p
PARD6B	hsa-let-7f-5p
PARD6B	hsa-miR-23b-3p
PARD6B	hsa-miR-27b-3p
ROBO2	hsa-miR-32-5p
SYT1	hsa-miR-221-3p
PARD6B	hsa-miR-98-5p
PARD6B	hsa-miR-374b-5p
PARD6B	hsa-miR-374a-5p
ROBO2	hsa-miR-363-3p
PARD6B	hsa-miR-20b-5p
PRR15	hsa-miR-20b-5p
PARD6B	hsa-miR-106a-5p
PRR15	hsa-miR-106a-5p
MALAT1	hsa-miR-200b-3p
XIST	hsa-miR-429
MALAT1	hsa-miR-429
XIST	hsa-miR-320b
NEAT1	hsa-miR-320b
SNHG5	hsa-miR-92b-3p
XIST	hsa-miR-92b-3p
MALAT1	hsa-miR-92b-3p
XIST	hsa-miR-9-5p
TUG1	hsa-miR-9-5p
SNHG7	hsa-miR-9-5p
NEAT1	hsa-miR-9-5p
HCG18	hsa-miR-34c-5p
SNHG7	hsa-miR-34c-5p
XIST	hsa-let-7a-5p
KCNQ1OT1	hsa-let-7a-5p
XIST	hsa-miR-200c-3p
MALAT1	hsa-miR-200c-3p
H19	hsa-miR-196a-5p
GAS5	hsa-miR-26a-5p
MALAT1	hsa-miR-26a-5p
SNHG6	hsa-miR-26a-5p
XIST	hsa-let-7i-5p
KCNQ1OT1	hsa-let-7i-5p
SNHG12	hsa-miR-320d
XIST	hsa-miR-320d
MALAT1	hsa-miR-320d
NEAT1	hsa-miR-320d
XIST	hsa-miR-17-5p
H19	hsa-miR-17-5p
HOTAIR	hsa-miR-17-5p
HCG18	hsa-miR-17-5p
MALAT1	hsa-miR-17-5p
XIST	hsa-miR-20a-5p
H19	hsa-miR-20a-5p
HOTAIR	hsa-miR-20a-5p
MALAT1	hsa-miR-20a-5p
XIST	hsa-miR-92a-3p
MALAT1	hsa-miR-92a-3p
NEAT1	hsa-miR-154-5p
SNHG1	hsa-miR-154-5p
MALAT1	hsa-miR-154-5p
XIST	hsa-miR-193b-3p
NEAT1	hsa-miR-193b-3p
SNHG7	hsa-miR-193b-3p
XIST	hsa-miR-144-3p
XIST	hsa-miR-193a-3p
NEAT1	hsa-miR-193a-3p
SNHG7	hsa-miR-193a-3p
TUG1	hsa-miR-142-3p
MALAT1	hsa-miR-142-3p
XIST	hsa-miR-454-3p
MIR17HG	hsa-miR-454-3p
XIST	hsa-miR-301a-3p
MIR17HG	hsa-miR-301a-3p
NEAT1	hsa-miR-320c
XIST	hsa-miR-27a-3p
NEAT1	hsa-miR-27a-3p
XIST	hsa-miR-23a-3p
MALAT1	hsa-miR-23a-3p
XIST	hsa-let-7e-5p
KCNQ1OT1	hsa-let-7e-5p
GAS5	hsa-miR-26b-5p
MALAT1	hsa-miR-26b-5p
SNHG6	hsa-miR-26b-5p
KCNQ1OT1	hsa-let-7c-5p
XIST	hsa-miR-301b
MIR17HG	hsa-miR-301b
XIST	hsa-miR-130b-3p
MIR17HG	hsa-miR-130b-3p
XIST	hsa-let-7b-5p
KCNQ1OT1	hsa-let-7b-5p
HCG18	hsa-miR-449a
HCG18	hsa-miR-449b-5p
SNHG7	hsa-miR-449b-5p
H19	hsa-miR-196b-5p
TUG1	hsa-miR-196b-5p
XIST	hsa-miR-25-3p
MALAT1	hsa-miR-25-3p
XIST	hsa-miR-93-5p
H19	hsa-miR-93-5p
HOTAIR	hsa-miR-93-5p
HCG18	hsa-miR-93-5p
MALAT1	hsa-miR-93-5p
XIST	hsa-miR-106b-5p
H19	hsa-miR-106b-5p
HOTAIR	hsa-miR-106b-5p
HCG18	hsa-miR-106b-5p
MALAT1	hsa-miR-106b-5p
XIST	hsa-miR-320a
NEAT1	hsa-miR-320a
SNHG12	hsa-miR-320a
GAS5	hsa-miR-873-5p
MALAT1	hsa-miR-873-5p
XIST	hsa-let-7f-5p
KCNQ1OT1	hsa-let-7f-5p
MALAT1	hsa-miR-23b-3p
NEAT1	hsa-miR-27b-3p
XIST	hsa-miR-32-5p
SNHG5	hsa-miR-32-5p
MALAT1	hsa-miR-32-5p
TUG1	hsa-miR-221-3p
HOTAIR	hsa-miR-221-3p
XIST	hsa-miR-98-5p
KCNQ1OT1	hsa-miR-98-5p
MALAT1	hsa-miR-374b-5p
MALAT1	hsa-miR-374a-5p
SNHG5	hsa-miR-363-3p
MALAT1	hsa-miR-363-3p
XIST	hsa-miR-20b-5p
H19	hsa-miR-20b-5p
MALAT1	hsa-miR-20b-5p
XIST	hsa-miR-106a-5p
H19	hsa-miR-106a-5p
HOTAIR	hsa-miR-106a-5p
MALAT1	hsa-miR-106a-5p

## Sheet: lncRNA-miRNA-mRNA network nodes
Gene	attribute
MALAT1	lncRNA
XIST	lncRNA
NEAT1	lncRNA
SNHG5	lncRNA
TUG1	lncRNA
SNHG7	lncRNA
HCG18	lncRNA
KCNQ1OT1	lncRNA
H19	lncRNA
GAS5	lncRNA
SNHG6	lncRNA
SNHG12	lncRNA
HOTAIR	lncRNA
SNHG1	lncRNA
MIR17HG	lncRNA
hsa-miR-200b-3p	miRNA
hsa-miR-429	miRNA
hsa-miR-320b	miRNA
hsa-miR-92b-3p	miRNA
hsa-miR-9-5p	miRNA
hsa-miR-130a-3p	miRNA
hsa-miR-139-5p	miRNA
hsa-miR-34c-5p	miRNA
hsa-let-7a-5p	miRNA
hsa-miR-100-5p	miRNA
hsa-miR-200c-3p	miRNA
hsa-miR-196a-5p	miRNA
hsa-miR-26a-5p	miRNA
hsa-let-7i-5p	miRNA
hsa-miR-320d	miRNA
hsa-miR-17-5p	miRNA
hsa-miR-20a-5p	miRNA
hsa-miR-92a-3p	miRNA
hsa-miR-381-3p	miRNA
hsa-miR-154-5p	miRNA
hsa-miR-193b-3p	miRNA
hsa-miR-144-3p	miRNA
hsa-miR-193a-3p	miRNA
hsa-miR-142-3p	miRNA
hsa-miR-454-3p	miRNA
hsa-miR-301a-3p	miRNA
hsa-miR-320c	miRNA
hsa-miR-27a-3p	miRNA
hsa-miR-23a-3p	miRNA
hsa-miR-99b-5p	miRNA
hsa-let-7e-5p	miRNA
hsa-miR-519d-3p	miRNA
hsa-miR-26b-5p	miRNA
hsa-miR-99a-5p	miRNA
hsa-let-7c-5p	miRNA
hsa-miR-301b	miRNA
hsa-miR-130b-3p	miRNA
hsa-let-7b-5p	miRNA
hsa-miR-449a	miRNA
hsa-miR-449b-5p	miRNA
hsa-miR-196b-5p	miRNA
hsa-miR-25-3p	miRNA
hsa-miR-93-5p	miRNA
hsa-miR-106b-5p	miRNA
hsa-miR-320a	miRNA
hsa-miR-873-5p	miRNA
hsa-let-7f-5p	miRNA
hsa-miR-23b-3p	miRNA
hsa-miR-27b-3p	miRNA
hsa-miR-32-5p	miRNA
hsa-miR-221-3p	miRNA
hsa-miR-98-5p	miRNA
hsa-miR-374b-5p	miRNA
hsa-miR-374a-5p	miRNA
hsa-miR-363-3p	miRNA
hsa-miR-20b-5p	miRNA
hsa-miR-106a-5p	miRNA
PARD6B	mRNA
ROBO2	mRNA
FBXL16	mRNA
PEX5L	mRNA
SYT9	mRNA
FGFR3	mRNA
SLC16A6	mRNA
PRR15	mRNA
BMPR1B	mRNA
SYT1	mRNA
COX6C	mRNA

## Sheet: lncRNA-RBP-mRNA network edges
Gene	RBP
CXADRP3	HuR
AGAP1-IT1	PTB
AC093642.3	PTB
RP11-503N18.1	PTB
RP3-468B3.2	eIF4AIII
PRSS29P	eIF4AIII
AC093642.3	eIF4AIII
LINC00595	eIF4AIII
NBPF5P	eIF4AIII
RP11-265N7.1	eIF4AIII
CTD-3023L14.2	eIF4AIII
AC009005.2	eIF4AIII
AGAP1-IT1	eIF4AIII
AC005301.8	eIF4AIII
RP11-150O12.3	eIF4AIII
CITF22-49D8.1	eIF4AIII
AL121578.2	eIF4AIII
RP11-379K22.3	eIF4AIII
LINC00176	eIF4AIII
RP4-781K5.4	eIF4AIII
RP11-624L4.1	eIF4AIII
RP11-53O19.1	eIF4AIII
RP11-304L19.12	eIF4AIII
RP3-326I13.1	eIF4AIII
PRSS29P	DGCR8
RP11-486M23.2	DGCR8
RP4-781K5.6	DGCR8
LINC00176	DGCR8
LINC00593	DGCR8
SMCR2	DGCR8
RP11-19J5.2	DGCR8
RP3-468B3.2	FUS
PRSS29P	FUS
AC093642.3	FUS
RP11-265N7.2	FUS
LINC00595	FUS
RP11-503N18.1	FUS
AC007405.8	FUS
CTA-392C11.1	FUS
AC011899.10	FUS
AC124944.5	FUS
AGAP1-IT1	FUS
CXADRP3	FUS
RP11-459E5.1	FUS
RP11-150O12.3	FUS
KCNH1-IT1	FUS
RP11-27M9.1	FUS
CLRN1-AS1	FUS
LINC00176	FUS
AC005150.1	FUS
RP11-624L4.1	FUS
LINC00593	FUS
RP11-1157N2__B.2	FUS
RP11-53O19.1	FUS
RP11-416N2.3	FUS
AC012594.1	FUS
RP11-680B3.2	FUS
RP11-304L19.12	FUS
RP11-127I20.5	FUS
CITF22-49D8.1	LIN28A
AL121578.2	ZC3H7B
LINC00176	TAF15
AC093642.3	U2AF65
CTD-3023L14.1	U2AF65
AC009005.2	U2AF65
LINC00176	U2AF65
RP11-53O19.1	U2AF65
AC009005.2	TIAL1
CLRN1-AS1	hnRNPC
CTA-392E5.1	UPF1
AC009005.2	UPF1
AGAP1-IT1	UPF1
KCNH1-IT1	UPF1
DSCAM-AS1	UPF1
AL121578.2	UPF1
RP11-53O19.1	UPF1
ARNT2	HuR
COX6C	HuR
DHRS2	HuR
DNAJC12	HuR
PARD6B	HuR
NAT1	HuR
BCAS4	HuR
RIMS4	HuR
KIFC2	HuR
GPRC5A	HuR
NELL2	HuR
FBXL16	HuR
TPRN	HuR
CLGN	HuR
METRN	HuR
AMH	HuR
SYT9	HuR
MAPK8IP2	HuR
FGFR3	HuR
CRABP2	HuR
SLITRK6	PTB
PTK6	PTB
CGA	PTB
HS6ST3	PTB
TSPAN1	PTB
SLC16A6	PTB
COX6C	PTB
MUC1	PTB
DNAJC12	PTB
BMPR1B	PTB
PARD6B	PTB
KCNH1	PTB
KLHL1	PTB
EEF1A2	PTB
ROBO2	PTB
KIFC2	PTB
GPRC5A	PTB
NELL2	PTB
FBXL16	PTB
MTL5	PTB
TPRN	PTB
METRN	PTB
AMH	PTB
GDF15	PTB
CACNG4	PTB
RAB26	PTB
C9orf116	PTB
MAPK8IP2	PTB
KCNK15	PTB
CREB3L1	PTB
SLC16A6	IGF2BP1
DHRS2	IGF2BP1
BMPR1B	IGF2BP1
PARD6B	IGF2BP1
RIMS4	IGF2BP1
EEF1A2	IGF2BP1
ROBO2	IGF2BP1
GPRC5A	IGF2BP1
NELL2	IGF2BP1
TPRN	IGF2BP1
C9orf172	IGF2BP1
CLGN	IGF2BP1
AMH	IGF2BP1
ZDHHC22	IGF2BP1
NKAIN1	IGF2BP1
SYT9	IGF2BP1
C9orf116	IGF2BP1
MAPK8IP2	IGF2BP1
EMX1	IGF2BP1
FGFR3	IGF2BP1
FGD3	IGF2BP2
DNAJC12	IGF2BP2
BMPR1B	IGF2BP2
PARD6B	IGF2BP2
RIMS4	IGF2BP2
GPRC5A	IGF2BP2
PAX2	IGF2BP2
TPRN	IGF2BP2
ZDHHC22	IGF2BP2
SYT9	IGF2BP2
MAPK8IP2	IGF2BP2
FGFR3	IGF2BP2
ARNT2	IGF2BP3
SEZ6L	IGF2BP3
CGA	IGF2BP3
SLC16A6	IGF2BP3
BMPR1B	IGF2BP3
FAM57B	IGF2BP3
PARD6B	IGF2BP3
RIMS4	IGF2BP3
ROBO2	IGF2BP3
GPRC5A	IGF2BP3
NELL2	IGF2BP3
CACNA1H	IGF2BP3
FBXL16	IGF2BP3
MTL5	IGF2BP3
STARD10	IGF2BP3
TPRN	IGF2BP3
CLGN	IGF2BP3
METRN	IGF2BP3
AMH	IGF2BP3
ZDHHC22	IGF2BP3
NKAIN1	IGF2BP3
SYT9	IGF2BP3
C9orf116	IGF2BP3
MAPK8IP2	IGF2BP3
FGFR3	IGF2BP3
CGA	PUM2
BMPR1B	PUM2
PARD6B	PUM2
NAT1	PUM2
GPRC5A	PUM2
FBXL16	PUM2
MYT1	PUM2
CCDC151	QKI
SYT9	QKI
PARD6B	TNRC6
RIMS4	TNRC6
CCDC151	TNRC6
GDF15	TNRC6
SYT9	TNRC6
CCDC108	eIF4AIII
ARNT2	eIF4AIII
SLITRK6	eIF4AIII
PTK6	eIF4AIII
FGD3	eIF4AIII
NBPF6	eIF4AIII
MAPK15	eIF4AIII
C19orf33	eIF4AIII
KISS1R	eIF4AIII
CGA	eIF4AIII
SBK2	eIF4AIII
LGALS9C	eIF4AIII
CST9	eIF4AIII
TMEM82	eIF4AIII
HS6ST3	eIF4AIII
DOK7	eIF4AIII
TSPAN1	eIF4AIII
TGM3	eIF4AIII
TNNT1	eIF4AIII
SLC16A6	eIF4AIII
CYP21A2	eIF4AIII
SYT1	eIF4AIII
IL20	eIF4AIII
KCNF1	eIF4AIII
AMZ1	eIF4AIII
CALY	eIF4AIII
EIF4E1B	eIF4AIII
PRR15	eIF4AIII
TMEM145	eIF4AIII
COX6C	eIF4AIII
MUC1	eIF4AIII
UNC5A	eIF4AIII
CFB	eIF4AIII
DEGS2	eIF4AIII
HAGHL	eIF4AIII
VSTM2A	eIF4AIII
ZG16B	eIF4AIII
SPINK4	eIF4AIII
CCDC78	eIF4AIII
F7	eIF4AIII
NBPF4	eIF4AIII
DHRS2	eIF4AIII
DNAJC12	eIF4AIII
BMPR1B	eIF4AIII
FAM57B	eIF4AIII
ZMYND10	eIF4AIII
PARD6B	eIF4AIII
ENTPD8	eIF4AIII
DUSP13	eIF4AIII
HSH2D	eIF4AIII
NAT1	eIF4AIII
CACNG1	eIF4AIII
TNFRSF18	eIF4AIII
C16orf92	eIF4AIII
BCAS4	eIF4AIII
RIMS4	eIF4AIII
EEF1A2	eIF4AIII
ROBO2	eIF4AIII
HPN	eIF4AIII
DIO1	eIF4AIII
KIFC2	eIF4AIII
GPRC5A	eIF4AIII
RHPN1	eIF4AIII
LRRC46	eIF4AIII
NELL2	eIF4AIII
SLC6A4	eIF4AIII
CACNA1H	eIF4AIII
CCDC151	eIF4AIII
2020-03-10	eIF4AIII
FBXL16	eIF4AIII
MTL5	eIF4AIII
TNNI3	eIF4AIII
STARD10	eIF4AIII
S100G	eIF4AIII
TPRN	eIF4AIII
SPEF1	eIF4AIII
DNASE1L2	eIF4AIII
CLGN	eIF4AIII
METRN	eIF4AIII
SYT13	eIF4AIII
AMH	eIF4AIII
FSIP1	eIF4AIII
AGR2	eIF4AIII
GDF15	eIF4AIII
LRG1	eIF4AIII
FOXH1	eIF4AIII
LRRC24	eIF4AIII
LCN12	eIF4AIII
CACNG4	eIF4AIII
RHBDL1	eIF4AIII
RAB26	eIF4AIII
CNTD2	eIF4AIII
TMPRSS6	eIF4AIII
C9orf116	eIF4AIII
MAPK8IP2	eIF4AIII
KCNK15	eIF4AIII
FGFR3	eIF4AIII
ADAMTS19	eIF4AIII
AKR7A3	eIF4AIII
CYP2A7	eIF4AIII
CRABP2	eIF4AIII
CREB3L1	eIF4AIII
MYT1	eIF4AIII
ARNT2	DGCR8
CDH7	DGCR8
FGD3	DGCR8
KISS1R	DGCR8
KRT37	DGCR8
DOK7	DGCR8
TSPAN1	DGCR8
RAMP1	DGCR8
TGM3	DGCR8
AMZ1	DGCR8
TUBA3C	DGCR8
SRMS	DGCR8
SSTR2	DGCR8
COX6C	DGCR8
OTOR	DGCR8
BMPR1B	DGCR8
FAM57B	DGCR8
WFDC6	DGCR8
ZMYND10	DGCR8
ENTPD8	DGCR8
KLHL1	DGCR8
DUSP13	DGCR8
SERPINA12	DGCR8
RIMS4	DGCR8
EEF1A2	DGCR8
ROBO2	DGCR8
MYOG	DGCR8
KIFC2	DGCR8
GPRC5A	DGCR8
RHPN1	DGCR8
NELL2	DGCR8
SLC6A4	DGCR8
CACNA1H	DGCR8
PAX2	DGCR8
HOXB1	DGCR8
GPR139	DGCR8
2020-03-10	DGCR8
MTL5	DGCR8
PGLYRP2	DGCR8
STARD10	DGCR8
CALHM1	DGCR8
TPRN	DGCR8
C9orf172	DGCR8
TRH	DGCR8
AMH	DGCR8
LRG1	DGCR8
LRRC24	DGCR8
RET	DGCR8
MAPK8IP2	DGCR8
FGFR3	DGCR8
CLRN1	DGCR8
CRABP2	DGCR8
MYT1	DGCR8
ARNT2	FMRP
CDH7	FMRP
HS6ST3	FMRP
SLC16A6	FMRP
UNC5A	FMRP
BMPR1B	FMRP
PARD6B	FMRP
NAT1	FMRP
BCAS4	FMRP
RIMS4	FMRP
EEF1A2	FMRP
GPRC5A	FMRP
NELL2	FMRP
SLC6A4	FMRP
CACNA1H	FMRP
PAX2	FMRP
FBXL16	FMRP
STARD10	FMRP
TPRN	FMRP
C9orf172	FMRP
METRN	FMRP
AMH	FMRP
NKAIN1	FMRP
SYT9	FMRP
MAPK8IP2	FMRP
FGFR3	FMRP
AKR7A3	FMRP
PARD6B	FXR1
PTK6	FXR2
PARD6B	FXR2
RIMS4	FXR2
EEF1A2	FXR2
AMH	FXR2
SYT9	FXR2
MAPK8IP2	FXR2
CCDC108	FUS
ARNT2	FUS
SLITRK6	FUS
PTK6	FUS
SEZ6L	FUS
CDH7	FUS
FAM135B	FUS
FGD3	FUS
MAPK15	FUS
CPB1	FUS
TFF3	FUS
NXPH1	FUS
BCAS1	FUS
SBK2	FUS
CAPN9	FUS
TMEM82	FUS
HS6ST3	FUS
DOK7	FUS
TSPAN1	FUS
RAMP1	FUS
TGM3	FUS
CYP2B6	FUS
KRT31	FUS
SLC16A6	FUS
CYP21A2	FUS
SYT1	FUS
SLC7A13	FUS
KCNF1	FUS
AMZ1	FUS
KCNJ3	FUS
TUBA3C	FUS
CALY	FUS
SRMS	FUS
EIF4E1B	FUS
SSTR2	FUS
TMEM145	FUS
GNG3	FUS
COX6C	FUS
MUC1	FUS
UNC5A	FUS
CFB	FUS
DEGS2	FUS
HAGHL	FUS
VSTM2A	FUS
ZG16B	FUS
CCDC78	FUS
LRRC31	FUS
NBPF4	FUS
PEX5L	FUS
SLC30A8	FUS
PYY	FUS
DNAJC12	FUS
GRM4	FUS
BMPR1B	FUS
FAM57B	FUS
LRFN2	FUS
HTR1E	FUS
ZMYND10	FUS
PARD6B	FUS
KCNH1	FUS
ENTPD8	FUS
KLHL1	FUS
DUSP13	FUS
SERPINA12	FUS
HSH2D	FUS
CCDC83	FUS
TNFRSF18	FUS
RIMS4	FUS
GRIA2	FUS
EEF1A2	FUS
ROBO2	FUS
HPN	FUS
DIO1	FUS
KIFC2	FUS
GPRC5A	FUS
RHPN1	FUS
NELL2	FUS
SLC6A4	FUS
CACNA1H	FUS
PAX2	FUS
HOXB1	FUS
KCNK16	FUS
2020-03-10	FUS
FBXL16	FUS
PGLYRP2	FUS
STARD10	FUS
S100G	FUS
CALHM1	FUS
TPRN	FUS
SPEF1	FUS
DNASE1L2	FUS
C9orf172	FUS
CLGN	FUS
METRN	FUS
SHISA9	FUS
SYT13	FUS
CST5	FUS
AMH	FUS
FSIP1	FUS
GP2	FUS
KCNE4	FUS
FAM196A	FUS
ZDHHC22	FUS
NKAIN1	FUS
LRG1	FUS
SLC44A4	FUS
FOXH1	FUS
LCN12	FUS
SYT9	FUS
CACNG4	FUS
CEACAM6	FUS
RHBDL1	FUS
RAB26	FUS
RET	FUS
CNTD2	FUS
C9orf116	FUS
MAPK8IP2	FUS
EMX1	FUS
GHRH	FUS
KCNK15	FUS
FGFR3	FUS
ADAMTS19	FUS
CLRN1	FUS
AKR7A3	FUS
CRABP2	FUS
CREB3L1	FUS
MYT1	FUS
ARNT2	LIN28A
RAMP1	LIN28A
SLC16A6	LIN28A
SSTR2	LIN28A
TMEM145	LIN28A
BMPR1B	LIN28A
PARD6B	LIN28A
BCAS4	LIN28A
RIMS4	LIN28A
EEF1A2	LIN28A
GPRC5A	LIN28A
FBXL16	LIN28A
MTL5	LIN28A
TPRN	LIN28A
C9orf172	LIN28A
METRN	LIN28A
AMH	LIN28A
FSIP1	LIN28A
SYT9	LIN28A
MAPK8IP2	LIN28A
FGFR3	LIN28A
CRABP2	LIN28A
ARNT2	LIN28B
KCNJ3	LIN28B
BMPR1B	LIN28B
PARD6B	LIN28B
RIMS4	LIN28B
EEF1A2	LIN28B
GPRC5A	LIN28B
NELL2	LIN28B
FBXL16	LIN28B
MTL5	LIN28B
AMH	LIN28B
C9orf116	LIN28B
ADAMTS19	LIN28B
TNNT1	LIN28
SYT1	LIN28
COX6C	LIN28
PARD6B	LIN28
RIMS4	LIN28
EEF1A2	LIN28
GPRC5A	LIN28
NELL2	LIN28
CLGN	LIN28
ZDHHC22	LIN28
GDF15	LIN28
MAPK8IP2	LIN28
FGFR3	LIN28
ADAMTS19	LIN28
PARD6B	MOV10
DNAJC12	ALKBH5
AMH	C17ORF85
RIMS4	C22ORF28
SPEF1	C22ORF28
AMH	C22ORF28
SYT9	C22ORF28
FGFR3	C22ORF28
PARD6B	CAPRIN1
RIMS4	CAPRIN1
AMH	CAPRIN1
CRABP2	CAPRIN1
COX6C	ZC3H7B
BMPR1B	ZC3H7B
PARD6B	ZC3H7B
RIMS4	ZC3H7B
NELL2	ZC3H7B
SYT9	ZC3H7B
ADAMTS19	ZC3H7B
PARD6B	EWSR1
ROBO2	EWSR1
CLGN	EWSR1
AMH	EWSR1
SYT9	EWSR1
CGA	FUS-mutant
COX6C	FUS-mutant
PARD6B	FUS-mutant
MAPK8IP2	FUS-mutant
FGFR3	FUS-mutant
TNNT1	SFRS1
SYT1	SFRS1
COX6C	SFRS1
PARD6B	SFRS1
CACNA1H	SFRS1
CLGN	SFRS1
EMX1	SFRS1
AKR7A3	SFRS1
PTK6	U2AF65
C19orf33	U2AF65
TNNT1	U2AF65
SLC16A6	U2AF65
COX6C	U2AF65
MUC1	U2AF65
HAGHL	U2AF65
ZG16B	U2AF65
SPINK4	U2AF65
DHRS2	U2AF65
BMPR1B	U2AF65
ZMYND10	U2AF65
PARD6B	U2AF65
NAT1	U2AF65
HPN	U2AF65
KIFC2	U2AF65
GPRC5A	U2AF65
RHPN1	U2AF65
CACNA1H	U2AF65
FBXL16	U2AF65
MTL5	U2AF65
TNNI3	U2AF65
STARD10	U2AF65
DNASE1L2	U2AF65
METRN	U2AF65
AMH	U2AF65
FSIP1	U2AF65
FOXH1	U2AF65
RHBDL1	U2AF65
RAB26	U2AF65
C9orf116	U2AF65
FGFR3	U2AF65
AKR7A3	U2AF65
CRABP2	U2AF65
CGA	TIA1
PARD6B	TIA1
BCAS4	TIA1
GPRC5A	TIA1
CLGN	TIA1
CRABP2	TIA1
ARNT2	TIAL1
PARD6B	TIAL1
BCAS4	TIAL1
GPRC5A	TIAL1
CACNA1H	TIAL1
CACNG4	TIAL1
FGFR3	TIAL1
CREB3L1	TIAL1
SLC16A6	hnRNPC
PARD6B	hnRNPC
GPRC5A	hnRNPC
FGFR3	hnRNPC
AKR7A3	hnRNPC
ARNT2	UPF1
SLITRK6	UPF1
PTK6	UPF1
FGD3	UPF1
NBPF6	UPF1
C19orf33	UPF1
KISS1R	UPF1
CGA	UPF1
HS6ST3	UPF1
DOK7	UPF1
TSPAN1	UPF1
TNNT1	UPF1
SLC16A6	UPF1
SYT1	UPF1
KCNJ3	UPF1
PRR15	UPF1
COX6C	UPF1
MUC1	UPF1
HAGHL	UPF1
CCDC78	UPF1
DHRS2	UPF1
DNAJC12	UPF1
BMPR1B	UPF1
FAM57B	UPF1
ZMYND10	UPF1
PARD6B	UPF1
HSH2D	UPF1
NAT1	UPF1
BCAS4	UPF1
RIMS4	UPF1
EEF1A2	UPF1
KIFC2	UPF1
GPRC5A	UPF1
RHPN1	UPF1
LRRC46	UPF1
NELL2	UPF1
CACNA1H	UPF1
PAX2	UPF1
2020-03-10	UPF1
FBXL16	UPF1
MTL5	UPF1
STARD10	UPF1
TPRN	UPF1
SPEF1	UPF1
C9orf172	UPF1
CLGN	UPF1
METRN	UPF1
AMH	UPF1
FSIP1	UPF1
GDF15	UPF1
NKAIN1	UPF1
RHBDL1	UPF1
RAB26	UPF1
C9orf116	UPF1
EMX1	UPF1
KCNK15	UPF1
FGFR3	UPF1
CRABP2	UPF1
MYT1	UPF1
ARNT2	TDP43
FGD3	TDP43
SYT1	TDP43
LRFN2	TDP43
GRIA2	TDP43
EEF1A2	TDP43
GPRC5A	TDP43
NELL2	TDP43
RAB26	TDP43
RET	TDP43
FGFR3	TDP43

## Sheet: lncRNA-RBP-mRNA network nodes
Gene	attribute
CXADRP3	lncRNA
AGAP1-IT1	lncRNA
AC093642.3	lncRNA
RP11-503N18.1	lncRNA
RP3-468B3.2	lncRNA
PRSS29P	lncRNA
LINC00595	lncRNA
NBPF5P	lncRNA
RP11-265N7.1	lncRNA
CTD-3023L14.2	lncRNA
AC009005.2	lncRNA
AC005301.8	lncRNA
RP11-150O12.3	lncRNA
CITF22-49D8.1	lncRNA
AL121578.2	lncRNA
RP11-379K22.3	lncRNA
LINC00176	lncRNA
RP4-781K5.4	lncRNA
RP11-624L4.1	lncRNA
RP11-53O19.1	lncRNA
RP11-304L19.12	lncRNA
RP3-326I13.1	lncRNA
RP11-486M23.2	lncRNA
RP4-781K5.6	lncRNA
LINC00593	lncRNA
SMCR2	lncRNA
RP11-19J5.2	lncRNA
RP11-265N7.2	lncRNA
AC007405.8	lncRNA
CTA-392C11.1	lncRNA
AC011899.10	lncRNA
AC124944.5	lncRNA
RP11-459E5.1	lncRNA
KCNH1-IT1	lncRNA
RP11-27M9.1	lncRNA
CLRN1-AS1	lncRNA
AC005150.1	lncRNA
RP11-1157N2__B.2	lncRNA
RP11-416N2.3	lncRNA
AC012594.1	lncRNA
RP11-680B3.2	lncRNA
RP11-127I20.5	lncRNA
CTD-3023L14.1	lncRNA
CTA-392E5.1	lncRNA
DSCAM-AS1	lncRNA
ARNT2	mRNA
COX6C	mRNA
DHRS2	mRNA
DNAJC12	mRNA
PARD6B	mRNA
NAT1	mRNA
BCAS4	mRNA
RIMS4	mRNA
KIFC2	mRNA
GPRC5A	mRNA
NELL2	mRNA
FBXL16	mRNA
TPRN	mRNA
CLGN	mRNA
METRN	mRNA
AMH	mRNA
SYT9	mRNA
MAPK8IP2	mRNA
FGFR3	mRNA
CRABP2	mRNA
SLITRK6	mRNA
PTK6	mRNA
CGA	mRNA
HS6ST3	mRNA
TSPAN1	mRNA
SLC16A6	mRNA
MUC1	mRNA
BMPR1B	mRNA
KCNH1	mRNA
KLHL1	mRNA
EEF1A2	mRNA
ROBO2	mRNA
MTL5	mRNA
GDF15	mRNA
CACNG4	mRNA
RAB26	mRNA
C9orf116	mRNA
KCNK15	mRNA
CREB3L1	mRNA
C9orf172	mRNA
ZDHHC22	mRNA
NKAIN1	mRNA
EMX1	mRNA
FGD3	mRNA
PAX2	mRNA
SEZ6L	mRNA
FAM57B	mRNA
CACNA1H	mRNA
STARD10	mRNA
MYT1	mRNA
CCDC151	mRNA
CCDC108	mRNA
NBPF6	mRNA
MAPK15	mRNA
C19orf33	mRNA
KISS1R	mRNA
SBK2	mRNA
LGALS9C	mRNA
CST9	mRNA
TMEM82	mRNA
DOK7	mRNA
TGM3	mRNA
TNNT1	mRNA
CYP21A2	mRNA
SYT1	mRNA
IL20	mRNA
KCNF1	mRNA
AMZ1	mRNA
CALY	mRNA
EIF4E1B	mRNA
PRR15	mRNA
TMEM145	mRNA
UNC5A	mRNA
CFB	mRNA
DEGS2	mRNA
HAGHL	mRNA
VSTM2A	mRNA
ZG16B	mRNA
SPINK4	mRNA
CCDC78	mRNA
F7	mRNA
NBPF4	mRNA
ZMYND10	mRNA
ENTPD8	mRNA
DUSP13	mRNA
HSH2D	mRNA
CACNG1	mRNA
TNFRSF18	mRNA
C16orf92	mRNA
HPN	mRNA
DIO1	mRNA
RHPN1	mRNA
LRRC46	mRNA
SLC6A4	mRNA
2020-03-10	mRNA
TNNI3	mRNA
S100G	mRNA
SPEF1	mRNA
DNASE1L2	mRNA
SYT13	mRNA
FSIP1	mRNA
AGR2	mRNA
LRG1	mRNA
FOXH1	mRNA
LRRC24	mRNA
LCN12	mRNA
RHBDL1	mRNA
CNTD2	mRNA
TMPRSS6	mRNA
ADAMTS19	mRNA
AKR7A3	mRNA
CYP2A7	mRNA
CDH7	mRNA
KRT37	mRNA
RAMP1	mRNA
TUBA3C	mRNA
SRMS	mRNA
SSTR2	mRNA
OTOR	mRNA
WFDC6	mRNA
SERPINA12	mRNA
MYOG	mRNA
HOXB1	mRNA
GPR139	mRNA
PGLYRP2	mRNA
CALHM1	mRNA
TRH	mRNA
RET	mRNA
CLRN1	mRNA
FAM135B	mRNA
CPB1	mRNA
TFF3	mRNA
NXPH1	mRNA
BCAS1	mRNA
CAPN9	mRNA
CYP2B6	mRNA
KRT31	mRNA
SLC7A13	mRNA
KCNJ3	mRNA
GNG3	mRNA
LRRC31	mRNA
PEX5L	mRNA
SLC30A8	mRNA
PYY	mRNA
GRM4	mRNA
LRFN2	mRNA
HTR1E	mRNA
CCDC83	mRNA
GRIA2	mRNA
KCNK16	mRNA
SHISA9	mRNA
CST5	mRNA
GP2	mRNA
KCNE4	mRNA
FAM196A	mRNA
SLC44A4	mRNA
CEACAM6	mRNA
GHRH	mRNA
HuR	RBP
PTB	RBP
eIF4AIII	RBP
DGCR8	RBP
FUS	RBP
LIN28A	RBP
ZC3H7B	RBP
TAF15	RBP
U2AF65	RBP
TIAL1	RBP
hnRNPC	RBP
UPF1	RBP
IGF2BP1	RBP
IGF2BP2	RBP
IGF2BP3	RBP
PUM2	RBP
QKI	RBP
TNRC6	RBP
FMRP	RBP
FXR1	RBP
FXR2	RBP
LIN28B	RBP
LIN28	RBP
MOV10	RBP
ALKBH5	RBP
C17ORF85	RBP
C22ORF28	RBP
CAPRIN1	RBP
EWSR1	RBP
FUS-mutant	RBP
SFRS1	RBP
TIA1	RBP
TDP43	RBP
