# Supplementary material for: Identification of key modules and genes associated with breast cancer prognosis using WGCNA and ceRNA network analysis
Source: Aging (Albany NY). 2020 Dec 9;13(2):2519–38. doi: 10.18632/aging.202285 (PMC7880379; doi:10.18632/aging.202285)
Supplement: Supplementary Table 8 [file aging-13-202285-s009.xlsx]

## Sheet: lncRNA-miRNA-mRNA network edges
Gene	miRNA
MALAT1	hsa-miR-106a-5p
HOTAIR	hsa-miR-106a-5p
XIST	hsa-miR-106a-5p
H19	hsa-miR-106a-5p
MALAT1	hsa-miR-106b-5p
H19	hsa-miR-106b-5p
HOTAIR	hsa-miR-106b-5p
HCG18	hsa-miR-106b-5p
XIST	hsa-miR-106b-5p
HCG18	hsa-miR-17-5p
HOTAIR	hsa-miR-17-5p
H19	hsa-miR-17-5p
MALAT1	hsa-miR-17-5p
XIST	hsa-miR-17-5p
MALAT1	hsa-miR-20a-5p
H19	hsa-miR-20a-5p
HOTAIR	hsa-miR-20a-5p
XIST	hsa-miR-20a-5p
H19	hsa-miR-20b-5p
MALAT1	hsa-miR-20b-5p
XIST	hsa-miR-20b-5p
XIST	hsa-miR-93-5p
HCG18	hsa-miR-93-5p
HOTAIR	hsa-miR-93-5p
H19	hsa-miR-93-5p
MALAT1	hsa-miR-93-5p
PRR15	hsa-miR-106a-5p
PRR15	hsa-miR-106a-5p
PRR15	hsa-miR-106a-5p
PRR15	hsa-miR-106a-5p
PRR15	hsa-miR-106b-5p
PRR15	hsa-miR-106b-5p
PRR15	hsa-miR-106b-5p
PRR15	hsa-miR-106b-5p
PRR15	hsa-miR-106b-5p
PRR15	hsa-miR-17-5p
PRR15	hsa-miR-17-5p
PRR15	hsa-miR-17-5p
PRR15	hsa-miR-17-5p
PRR15	hsa-miR-17-5p
PRR15	hsa-miR-20a-5p
PRR15	hsa-miR-20a-5p
PRR15	hsa-miR-20a-5p
PRR15	hsa-miR-20a-5p
PRR15	hsa-miR-20b-5p
PRR15	hsa-miR-20b-5p
PRR15	hsa-miR-20b-5p
PRR15	hsa-miR-93-5p
PRR15	hsa-miR-93-5p
PRR15	hsa-miR-93-5p
PRR15	hsa-miR-93-5p
PRR15	hsa-miR-93-5p
XIST	hsa-let-7a-5p
KCNQ1OT1	hsa-let-7a-5p
KCNQ1OT1	hsa-let-7b-5p
XIST	hsa-let-7b-5p
KCNQ1OT1	hsa-let-7c-5p
KCNQ1OT1	hsa-let-7e-5p
XIST	hsa-let-7e-5p
XIST	hsa-let-7f-5p
KCNQ1OT1	hsa-let-7f-5p
KCNQ1OT1	hsa-let-7i-5p
XIST	hsa-let-7i-5p
MALAT1	hsa-miR-106a-5p
HOTAIR	hsa-miR-106a-5p
XIST	hsa-miR-106a-5p
H19	hsa-miR-106a-5p
MALAT1	hsa-miR-106b-5p
H19	hsa-miR-106b-5p
HOTAIR	hsa-miR-106b-5p
HCG18	hsa-miR-106b-5p
XIST	hsa-miR-106b-5p
MALAT1	hsa-miR-142-3p
TUG1	hsa-miR-142-3p
HCG18	hsa-miR-17-5p
HOTAIR	hsa-miR-17-5p
H19	hsa-miR-17-5p
MALAT1	hsa-miR-17-5p
XIST	hsa-miR-17-5p
H19	hsa-miR-196a-5p
TUG1	hsa-miR-196b-5p
H19	hsa-miR-196b-5p
MALAT1	hsa-miR-200b-3p
XIST	hsa-miR-200c-3p
MALAT1	hsa-miR-200c-3p
MALAT1	hsa-miR-20a-5p
H19	hsa-miR-20a-5p
HOTAIR	hsa-miR-20a-5p
XIST	hsa-miR-20a-5p
H19	hsa-miR-20b-5p
MALAT1	hsa-miR-20b-5p
XIST	hsa-miR-20b-5p
MALAT1	hsa-miR-23a-3p
XIST	hsa-miR-23a-3p
MALAT1	hsa-miR-23b-3p
XIST	hsa-miR-27a-3p
NEAT1	hsa-miR-27a-3p
NEAT1	hsa-miR-27b-3p
XIST	hsa-miR-320a
SNHG12	hsa-miR-320a
NEAT1	hsa-miR-320a
NEAT1	hsa-miR-320b
XIST	hsa-miR-320b
NEAT1	hsa-miR-320c
MALAT1	hsa-miR-320d
SNHG12	hsa-miR-320d
NEAT1	hsa-miR-320d
XIST	hsa-miR-320d
MALAT1	hsa-miR-374a-5p
MALAT1	hsa-miR-374b-5p
MALAT1	hsa-miR-429
XIST	hsa-miR-429
XIST	hsa-miR-93-5p
HCG18	hsa-miR-93-5p
HOTAIR	hsa-miR-93-5p
H19	hsa-miR-93-5p
MALAT1	hsa-miR-93-5p
KCNQ1OT1	hsa-miR-98-5p
XIST	hsa-miR-98-5p
PARD6B	hsa-let-7a-5p
PARD6B	hsa-let-7a-5p
PARD6B	hsa-let-7b-5p
PARD6B	hsa-let-7b-5p
PARD6B	hsa-let-7c-5p
PARD6B	hsa-let-7e-5p
PARD6B	hsa-let-7e-5p
PARD6B	hsa-let-7f-5p
PARD6B	hsa-let-7f-5p
PARD6B	hsa-let-7i-5p
PARD6B	hsa-let-7i-5p
PARD6B	hsa-miR-106a-5p
PARD6B	hsa-miR-106a-5p
PARD6B	hsa-miR-106a-5p
PARD6B	hsa-miR-106a-5p
PARD6B	hsa-miR-106b-5p
PARD6B	hsa-miR-106b-5p
PARD6B	hsa-miR-106b-5p
PARD6B	hsa-miR-106b-5p
PARD6B	hsa-miR-106b-5p
PARD6B	hsa-miR-142-3p
PARD6B	hsa-miR-142-3p
PARD6B	hsa-miR-17-5p
PARD6B	hsa-miR-17-5p
PARD6B	hsa-miR-17-5p
PARD6B	hsa-miR-17-5p
PARD6B	hsa-miR-17-5p
PARD6B	hsa-miR-196a-5p
PARD6B	hsa-miR-196b-5p
PARD6B	hsa-miR-196b-5p
PARD6B	hsa-miR-200b-3p
PARD6B	hsa-miR-200c-3p
PARD6B	hsa-miR-200c-3p
PARD6B	hsa-miR-20a-5p
PARD6B	hsa-miR-20a-5p
PARD6B	hsa-miR-20a-5p
PARD6B	hsa-miR-20a-5p
PARD6B	hsa-miR-20b-5p
PARD6B	hsa-miR-20b-5p
PARD6B	hsa-miR-20b-5p
PARD6B	hsa-miR-23a-3p
PARD6B	hsa-miR-23a-3p
PARD6B	hsa-miR-23b-3p
PARD6B	hsa-miR-27a-3p
PARD6B	hsa-miR-27a-3p
PARD6B	hsa-miR-27b-3p
PARD6B	hsa-miR-320a
PARD6B	hsa-miR-320a
PARD6B	hsa-miR-320a
PARD6B	hsa-miR-320b
PARD6B	hsa-miR-320b
PARD6B	hsa-miR-320c
PARD6B	hsa-miR-320d
PARD6B	hsa-miR-320d
PARD6B	hsa-miR-320d
PARD6B	hsa-miR-320d
PARD6B	hsa-miR-374a-5p
PARD6B	hsa-miR-374b-5p
PARD6B	hsa-miR-429
PARD6B	hsa-miR-429
PARD6B	hsa-miR-93-5p
PARD6B	hsa-miR-93-5p
PARD6B	hsa-miR-93-5p
PARD6B	hsa-miR-93-5p
PARD6B	hsa-miR-93-5p
PARD6B	hsa-miR-98-5p
PARD6B	hsa-miR-98-5p
GAS5	hsa-miR-873-5p
MALAT1	hsa-miR-873-5p
COX6C	hsa-miR-873-5p
COX6C	hsa-miR-873-5p

## Sheet: Sheet3
Gene	attribute
MALAT1	lncRNA
HOTAIR	lncRNA
XIST	lncRNA
H19	lncRNA
HCG18	lncRNA
GAS5	lncRNA
KCNQ1OT1	lncRNA
TUG1	lncRNA
NEAT1	lncRNA
SNHG12	lncRNA
hsa-miR-106a-5p	miRNA
hsa-miR-106b-5p	miRNA
hsa-miR-17-5p	miRNA
hsa-miR-20a-5p	miRNA
hsa-miR-20b-5p	miRNA
hsa-miR-93-5p	miRNA
hsa-miR-873-5p	miRNA
hsa-let-7a-5p	miRNA
hsa-let-7b-5p	miRNA
hsa-let-7c-5p	miRNA
hsa-let-7e-5p	miRNA
hsa-let-7f-5p	miRNA
hsa-let-7i-5p	miRNA
hsa-miR-142-3p	miRNA
hsa-miR-196a-5p	miRNA
hsa-miR-196b-5p	miRNA
hsa-miR-200b-3p	miRNA
hsa-miR-200c-3p	miRNA
hsa-miR-23a-3p	miRNA
hsa-miR-23b-3p	miRNA
hsa-miR-27a-3p	miRNA
hsa-miR-27b-3p	miRNA
hsa-miR-320a	miRNA
hsa-miR-320b	miRNA
hsa-miR-320c	miRNA
hsa-miR-320d	miRNA
hsa-miR-374a-5p	miRNA
hsa-miR-374b-5p	miRNA
hsa-miR-429	miRNA
hsa-miR-98-5p	miRNA
PRR15	mRNA
COX6C	mRNA
PARD6B	mRNA

## Sheet: lncRNA-RBP-mRNA network edges
Gene	RBP
AC009005.2	U2AF65
AC009005.2	UPF1
AC009005.2	TIAL1
AC009005.2	eIF4AIII
AC093642.3	PTB
AC093642.3	eIF4AIII
AC093642.3	U2AF65
AC093642.3	FUS
AGAP1-IT1	FUS
AGAP1-IT1	UPF1
AGAP1-IT1	eIF4AIII
AGAP1-IT1	PTB
AL121578.2	eIF4AIII
AL121578.2	UPF1
AL121578.2	ZC3H7B
DSCAM-AS1	UPF1
KCNH1-IT1	FUS
KCNH1-IT1	UPF1
LINC00176	eIF4AIII
LINC00176	FUS
LINC00176	U2AF65
LINC00595	eIF4AIII
LINC00595	FUS
PRSS29P	FUS
PRSS29P	eIF4AIII
RP11-150O12.3	eIF4AIII
RP11-150O12.3	FUS
RP11-304L19.12	FUS
RP11-304L19.12	eIF4AIII
RP11-53O19.1	UPF1
RP11-53O19.1	U2AF65
RP11-53O19.1	eIF4AIII
RP11-53O19.1	FUS
RP11-624L4.1	eIF4AIII
RP11-624L4.1	FUS
RP3-468B3.2	eIF4AIII
RP3-468B3.2	FUS
PARD6B	U2AF65
PARD6B	UPF1
PARD6B	TIAL1
PARD6B	eIF4AIII
PARD6B	PTB
PARD6B	eIF4AIII
PARD6B	U2AF65
PARD6B	FUS
PARD6B	FUS
PARD6B	UPF1
PARD6B	eIF4AIII
PARD6B	PTB
PARD6B	eIF4AIII
PARD6B	UPF1
PARD6B	ZC3H7B
PARD6B	UPF1
PARD6B	FUS
PARD6B	UPF1
PARD6B	eIF4AIII
PARD6B	FUS
PARD6B	U2AF65
PARD6B	eIF4AIII
PARD6B	FUS
PARD6B	FUS
PARD6B	eIF4AIII
PARD6B	eIF4AIII
PARD6B	FUS
PARD6B	FUS
PARD6B	eIF4AIII
PARD6B	UPF1
PARD6B	U2AF65
PARD6B	eIF4AIII
PARD6B	FUS
PARD6B	eIF4AIII
PARD6B	FUS
PARD6B	eIF4AIII
PARD6B	FUS
AC009005.2	U2AF65
AC009005.2	eIF4AIII
AC009005.2	UPF1
AC093642.3	FUS
AC093642.3	PTB
AC093642.3	U2AF65
AC093642.3	eIF4AIII
AGAP1-IT1	FUS
AGAP1-IT1	eIF4AIII
AGAP1-IT1	PTB
AGAP1-IT1	UPF1
AL121578.2	eIF4AIII
AL121578.2	ZC3H7B
AL121578.2	UPF1
DSCAM-AS1	UPF1
KCNH1-IT1	UPF1
KCNH1-IT1	FUS
LINC00176	DGCR8
LINC00176	eIF4AIII
LINC00176	U2AF65
LINC00176	FUS
LINC00595	eIF4AIII
LINC00595	FUS
PRSS29P	eIF4AIII
PRSS29P	DGCR8
PRSS29P	FUS
RP11-150O12.3	eIF4AIII
RP11-150O12.3	FUS
RP11-304L19.12	FUS
RP11-304L19.12	eIF4AIII
RP11-53O19.1	U2AF65
RP11-53O19.1	FUS
RP11-53O19.1	eIF4AIII
RP11-53O19.1	UPF1
RP11-624L4.1	eIF4AIII
RP11-624L4.1	FUS
RP3-468B3.2	eIF4AIII
RP3-468B3.2	FUS
COX6C	U2AF65
COX6C	eIF4AIII
COX6C	UPF1
COX6C	FUS
COX6C	PTB
COX6C	U2AF65
COX6C	eIF4AIII
COX6C	FUS
COX6C	eIF4AIII
COX6C	PTB
COX6C	UPF1
COX6C	eIF4AIII
COX6C	ZC3H7B
COX6C	UPF1
COX6C	UPF1
COX6C	UPF1
COX6C	FUS
COX6C	DGCR8
COX6C	eIF4AIII
COX6C	U2AF65
COX6C	FUS
COX6C	eIF4AIII
COX6C	FUS
COX6C	eIF4AIII
COX6C	DGCR8
COX6C	FUS
COX6C	eIF4AIII
COX6C	FUS
COX6C	FUS
COX6C	eIF4AIII
COX6C	U2AF65
COX6C	FUS
COX6C	eIF4AIII
COX6C	UPF1
COX6C	eIF4AIII
COX6C	FUS
COX6C	eIF4AIII
COX6C	FUS
AC009005.2	eIF4AIII
AC009005.2	UPF1
AC093642.3	eIF4AIII
AGAP1-IT1	UPF1
AGAP1-IT1	eIF4AIII
AL121578.2	UPF1
AL121578.2	eIF4AIII
DSCAM-AS1	UPF1
KCNH1-IT1	UPF1
LINC00176	eIF4AIII
LINC00595	eIF4AIII
PRSS29P	eIF4AIII
RP11-150O12.3	eIF4AIII
RP11-304L19.12	eIF4AIII
RP11-53O19.1	UPF1
RP11-53O19.1	eIF4AIII
RP11-624L4.1	eIF4AIII
RP3-468B3.2	eIF4AIII
PRR15	eIF4AIII
PRR15	UPF1
PRR15	eIF4AIII
PRR15	UPF1
PRR15	eIF4AIII
PRR15	UPF1
PRR15	eIF4AIII
PRR15	UPF1
PRR15	UPF1
PRR15	eIF4AIII
PRR15	eIF4AIII
PRR15	eIF4AIII
PRR15	eIF4AIII
PRR15	eIF4AIII
PRR15	UPF1
PRR15	eIF4AIII
PRR15	eIF4AIII
PRR15	eIF4AIII

## Sheet: lncRNA-RBP-mRNA network nodes
Supplementary Table 8. Genes in LncRNA-miRNA-mRNA ceRNA and lncRNA-RBP-mRNA networks related hub genes.
Gene	attribute
AC009005.2	lncRNA
AC093642.3	lncRNA
AGAP1-IT1	lncRNA
AL121578.2	lncRNA
DSCAM-AS1	lncRNA
KCNH1-IT1	lncRNA
LINC00176	lncRNA
LINC00595	lncRNA
PRSS29P	lncRNA
RP11-150O12.3	lncRNA
RP11-304L19.12	lncRNA
RP11-53O19.1	lncRNA
RP11-624L4.1	lncRNA
RP3-468B3.2	lncRNA
U2AF65	RBP
UPF1	RBP
TIAL1	RBP
eIF4AIII	RBP
PTB	RBP
FUS	RBP
ZC3H7B	RBP
DGCR8	RBP
PARD6B	mRNA
COX6C	mRNA
PRR15	mRNA
